# Supplementary material for: DigiChemTree enables programmable light-induced carbene generation for on demand chemical synthesis
Source: PubMed Central journal article supplement — Commun Chem. 2024 Nov 1;7:251. doi: 10.1038/s42004-024-01330-z (PMC11530455; doi:10.1038/s42004-024-01330-z), 2024-11-01
Supplement: 42004_2024_1330_MOESM1_ESM.pdf [file 42004_2024_1330_MOESM1_ESM.pdf]

*This manuscript has been previously reviewed at another journal. This document only contains information relating to versions considered at Communications Chemistry.*

## DigiChemTree enables programmable light-induced carbene generation for on demand chemical synthesis

Corresponding Author: Dr Ajay Singh

Version 0:

Reviewer comments:

Reviewer #1

(Remarks to the Author)

Based on my previous comments, I would support the publication of the work in its current form. I am glad that the authors addressed all the critiques, and I believe that the work is now much more clear and easy to follow than the initial submission.

Regarding Reviewer 3 comments: I think that the authors addressed all the points in an appropriate way. The authors have proven that the BO algorithm is working as it should, the argumentation on the number of experiments is arbitrary and well explained by the authors as well. Based on my understanding, I believe that the authors addressed the comments of Reviewer 3. My proposal of publication still stands.

**Open Access** This Peer Review File is licensed under a Creative Commons Attribution 4.0 International License, which permits use, sharing, adaptation, distribution and reproduction in any medium or format, as long as you give appropriate credit to the original author(s) and the source, provide a link to the Creative Commons license, and indicate if changes were made.

In cases where reviewers are anonymous, credit should be given to 'Anonymous Referee' and the source.

The images or other third party material in this Peer Review File are included in the article's Creative Commons license, unless indicated otherwise in a credit line to the material. If material is not included in the article's Creative Commons license and your intended use is not permitted by statutory regulation or exceeds the permitted use, you will need to obtain permission directly from the copyright holder.

To view a copy of this license, visit <https://creativecommons.org/licenses/by/4.0/>
