# Supplementary material for: DigiChemTree enables programmable light-induced carbene generation for on demand chemical synthesis
Source: PubMed Central journal article supplement — Commun Chem. 2024 Nov 1;7:251. doi: 10.1038/s42004-024-01330-z (PMC11530455; doi:10.1038/s42004-024-01330-z), 2024-11-01
Supplement: 42004_2024_1330_MOESM2_ESM.pdf [file 42004_2024_1330_MOESM2_ESM.pdf]

# **DigiChemTree enables programmable light-induced carbene generation for on demand chemical synthesis**

Abhilash Rana,<sup>1</sup> Ruchi Chauhan,<sup>1</sup> Amirreza Mottafeqh,<sup>2</sup> Dong Pyo Kim,<sup>2</sup> and Ajay K. Singh<sup>\*1</sup>

- [1] Abhilash Rana, Ruchi Chauhan, Ajay K. Singh\*, Department of organic Synthesis & Process Chemistry, CSIR-Indian Institute of Chemical Technology, Hyderabad 500007 (India) E-mail: ajaysingh015@iict.res.in; ajaysingh015@gmail.com and Academy of Scientific and Innovative Research (AcSIR) Ghaziabad 201002 (India)
- [2] Center for Intelligent Microprocess of Pharmaceutical Synthesis, Department of Chemical Engineering, Pohang University of Science and Technology (POSTECH), Pohang 37673, Republic of Korea
- Abhilash Rana and Ruchi Chauhan equally contributed the work

## Table of contents:

|      |                                                                                                                          |             |
|------|--------------------------------------------------------------------------------------------------------------------------|-------------|
| S1.  | General                                                                                                                  | <b>S3</b>   |
|      | S1.1. Materials.                                                                                                         |             |
|      | S1.2 Analysis.                                                                                                           |             |
| S2.  | Automated system overview                                                                                                | <b>S4</b>   |
| S3   | Case study-1: Carbene insertion (C-O bond formation) single objective multi-variant auto-optimization.                   | <b>S20</b>  |
| S4   | Case study-2: Carbene insertion (C-S bond formation) single objective multi-variant auto-optimization.                   | <b>S46</b>  |
| S5   | Case study-3: Carbene insertion (C-N bond formation) single objective multi-variant auto-optimization.                   | <b>S66</b>  |
| S6   | Case study-4: Carbene insertion (C-C bond formation, cyclopropanation) single objective multi-variant auto-optimization. | <b>S87</b>  |
| S7   | Case study-5: Carbene insertion (C-C bond formation, cyclopropanation) single objective multi-variant auto-optimization. | <b>S108</b> |
| S8   | Case study-6: Carbene insertion (N-C-O bond formation, oxazole) single objective multi-variant auto-optimization.        | <b>S128</b> |
| S9   | Case study-7: Carbene insertion (C=C bond formation, fumarate) single objective multi-variant auto-optimization.         | <b>S142</b> |
| S10. | Case study-8: On demand chemical synthesis.                                                                              | <b>S156</b> |
| S11. | Troubleshooting                                                                                                          | <b>S208</b> |
| S12. | Supplementary references                                                                                                 | <b>S209</b> |

## Supplementary Methods

### S1. General

**S1.1. Materials:** Most of the reagents and chemicals are bought from Sigma-Aldrich and used as such without any further purification. Common organic chemicals and salts were purchased from AVRA chemicals, India. Water used for the experiments was deionized water (18.2 mS conductivity). All work-up and purification procedures were carried out with reagent-grade solvents in air. Analytical thin-layer chromatography (TLC) was performed using analytical chromatography silica gel 60 F254 precoated plates (0.25 mm). The developed chromatogram was analysed by UV lamp (254 nm). PTFE (id = 500  $\mu\text{m}$ ) tubing, T-junction, high-purity PFA tubing was purchased from Upchurch IDEX HEALTH & SCIENCE. The photo-batch reactor bought from Lelesil Mumbai India was slightly modified for the continuous flow reaction. Visible light (Blue, Red, Green LED) reactor was bought from the Smartchemsynth Machine Pvt. Ltd, Hyderabad.

**S1.2. Analysis:** High-resolution mass spectra (HRMS) were obtained from a JMS-T100TD instrument (DART) and Thermo Fisher Scientific Exactive (APCI). Nuclear magnetic resonance (NMR) spectra were recorded on a Bruker 600, 500, 400 or 300 MHz in  $\text{CDCl}_3$  or  $\text{DMSO-}d_6$  solvent. Chemical shifts for  $^1\text{H}$  NMR are expressed in parts per million (ppm) relative to tetramethylsilane ( $\delta$  0.00 ppm). Chemical shifts for  $^{13}\text{C}$  NMR are expressed in ppm relative to  $\text{CDCl}_3$  ( $\delta$  77.0 ppm). Data are reported as follows: chemical shift, multiplicity (s = singlet, d = doublet, dd = doublet of doublets, t = triplet, q = quartet, quin = quintet, sext = sextet, m = multiplet), coupling constant (Hz). GC/MS analysis was conducted on a Shimadzu technology GCMS-QP2010 instrument equipped with a HP-5 column (30 m  $\times$  0.25 mm, Hewlett-Packard) and inbuilt MS 5975C VL MSD system with triple axis detector.

## S2. Automated system overview

### S2.1. Automated system components

**Table S1.** Outlines the hardware components utilized in the automated platform, with color coding representing distinct modules (green: operation module, blue: reaction module, yellow: analysis module, purple: fraction sample collection).

| Type               | Manufacturer     | Module             | Function                   | Communication protocol | Details in section |
|--------------------|------------------|--------------------|----------------------------|------------------------|--------------------|
| Syringe pump       | HARVARD          | Operational module | Solvent delivery           | Serial, USB            | 2.2.1              |
| HPLC pump          | KNAUER           | Operational module | Solvent delivery           | LAN                    | 2.2.1              |
| Continuous Syringe | SMART CHEM SYNTH | Operational module | Solvent delivery           | Serial, USB            | 2.2.1              |
| Power supply       | OWON             | Reaction module    | Reaction                   | Serial, USB            | 2.2.2              |
| Blue LED           | SMART CHEM SYNTH | Reaction module    | Reaction                   | Serial, USB            | 2.2.2              |
| In-line IR         | METTLER TOLEDO   | Analysis module    | Sample analysis            | Serial, USB            | 2.2.3              |
| 3D printer         | ENDER            | Collection module  | Fraction sample collection | Serial, USB            | 2.2.4              |

### S2.2. Automated system hardware module.

#### S2.2.1 Operational module

The HPLC pumps (figure S1a) and Harvard syringe pump (figure S1b) were directly interfaced to the main computer via an RS-232 interface or LAN. These pumps will help in introducing reactants and reagent solutions into the micro reactor with varied flow rate as the central computer's prescribed flow rate (fr). This control protocol also includes starting/stopping of the pump. The

central computer and the HPLC pump communicated through serial communication using ASCII code to exchange information about flow rate, operational status, and duration. This facilitated the transmission of essential details from the main computer to the pumps, enabling them to commence their operations as required. The syringe pump (figure S1c) The parameters for the serial communication of the syringe pump with the computer are given as follows: Baud Rate - 9600, Flow control – none. The basic control protocols include starting/stopping the pump and setting different parameters. Arduino (figure S1d) connected to syringe pump directly interfaced to the main computer via an RS-232 interface or LAN and helps in controlling flow rate. It has inbuilt proximity sensor and pulse will generate through Arduino program.

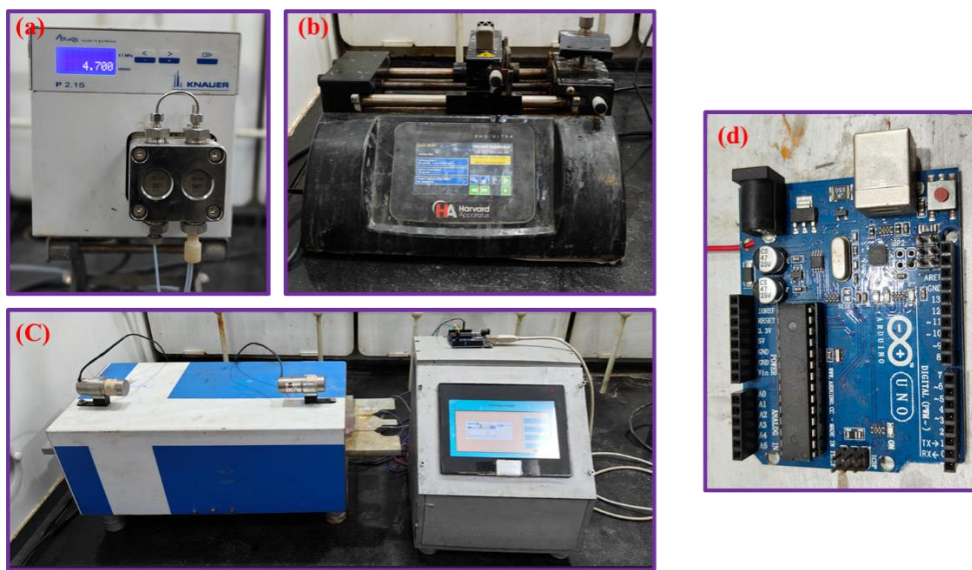

**Figure S1.** Picture of working syringe pump and HPLC pump (a) HPLC pump (Knauer) (b) syringe pump (Harvard) (c) Continuous syringe pump with Arduino (smarthchemsynth) (d) Arduino.

### S2.2.2 Reaction module

We employed a commercially accessible cylindrical blue LED (figure S2b) for the photochemical reaction, utilizing a programmable power supply manufacture by Owon (figure S2a) to regulate the lamp's power (measured in watts) by managing both current and voltage. The Blue LED produces light in the range of wavelength 450-495 nm and it can be operated up to 5 A current, and 14.5 v voltage corresponds to about 70 w wattage. Additionally, rotating fan was attached to the bottom of cylindrical blue LED light to maintain the room temperature throughout the reaction. The central computer and the power supply communicated through serial communication using ASCII code to exchange information about varied voltage, current and operational status.

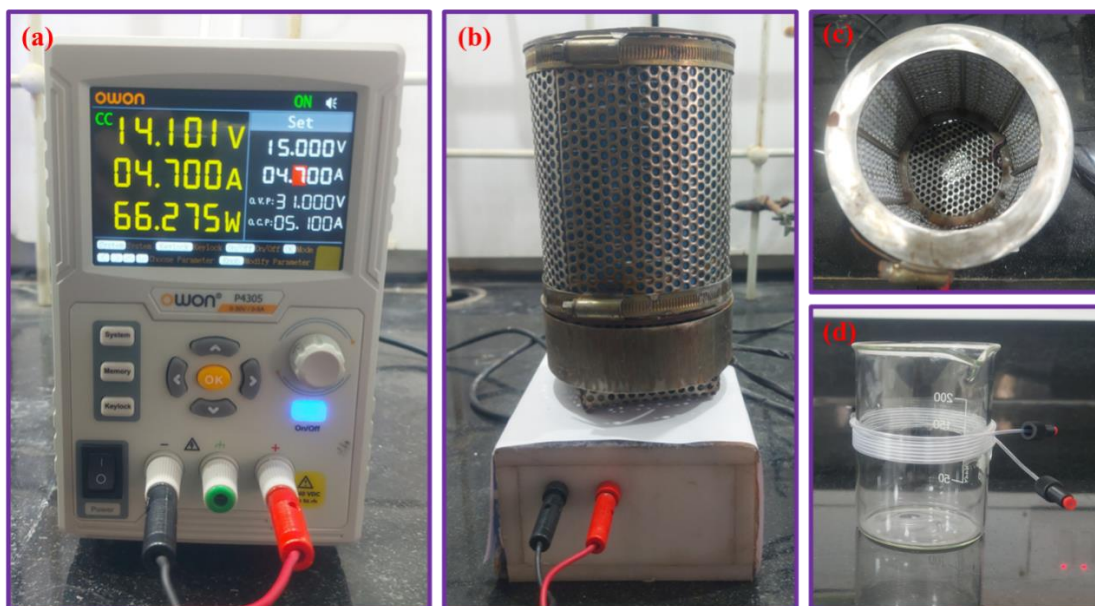

**Figure S2.** Manual designed photo-flow reactor; (a) power supply (b-c) blue LED module with cooling fan (1-70W, 460 nm max); (d) 1mL PFA coiled reactor (1.2-meter length, OD = 1.58 mm and id = 1.0 mm).

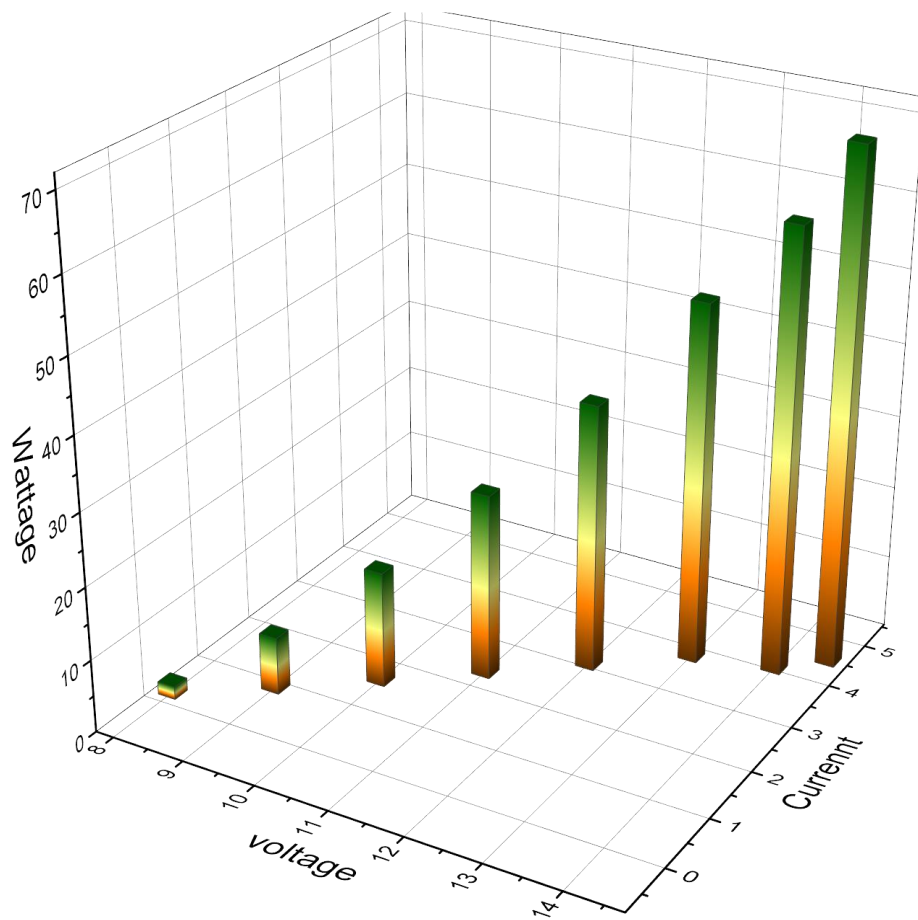

**Figure S3.** 3D graph elucidating the correlation among voltage (V), current (Amp), and the emission of blue light (Wattage).

### S2.2.3 Analysis module

#### **In-line FTIR analysis**

*In-situ* reaction analysis was accomplished by recording IR (functional group, shifting peak in product) spectra using a benchtop ReactIR 15 base unit with DS Micro Flow Cell (Mettler toledo). It works through sensing the amount of infrared radiation after passing through a sample, generating a 2D graph with absorption on the Y-axis and wavenumber on the X-axis, having optical range from 4000 to 650  $\text{cm}^{-1}$ . The system collected spectra with 16 scans at resolution 4  $\text{cm}^{-1}$ .

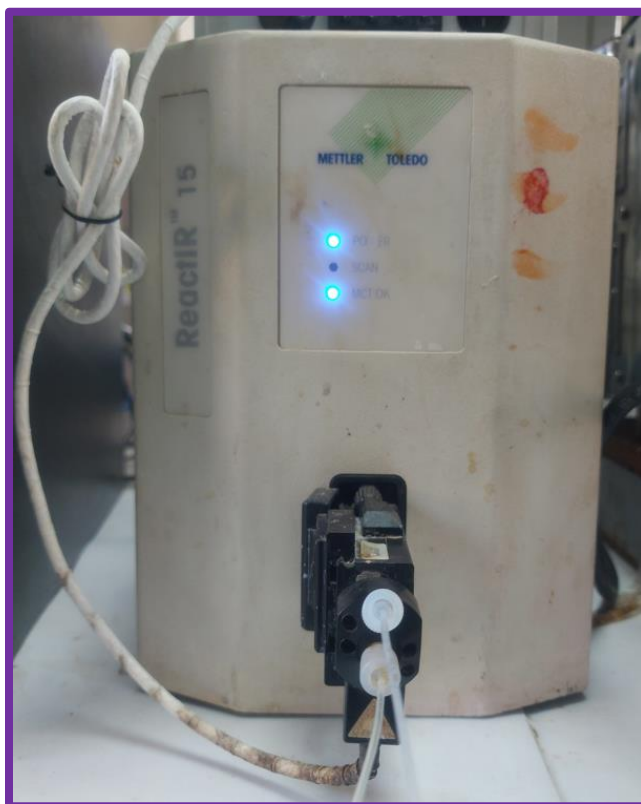

**Figure S4.** Actual photograph of ReactIR 15 flow cell setup.



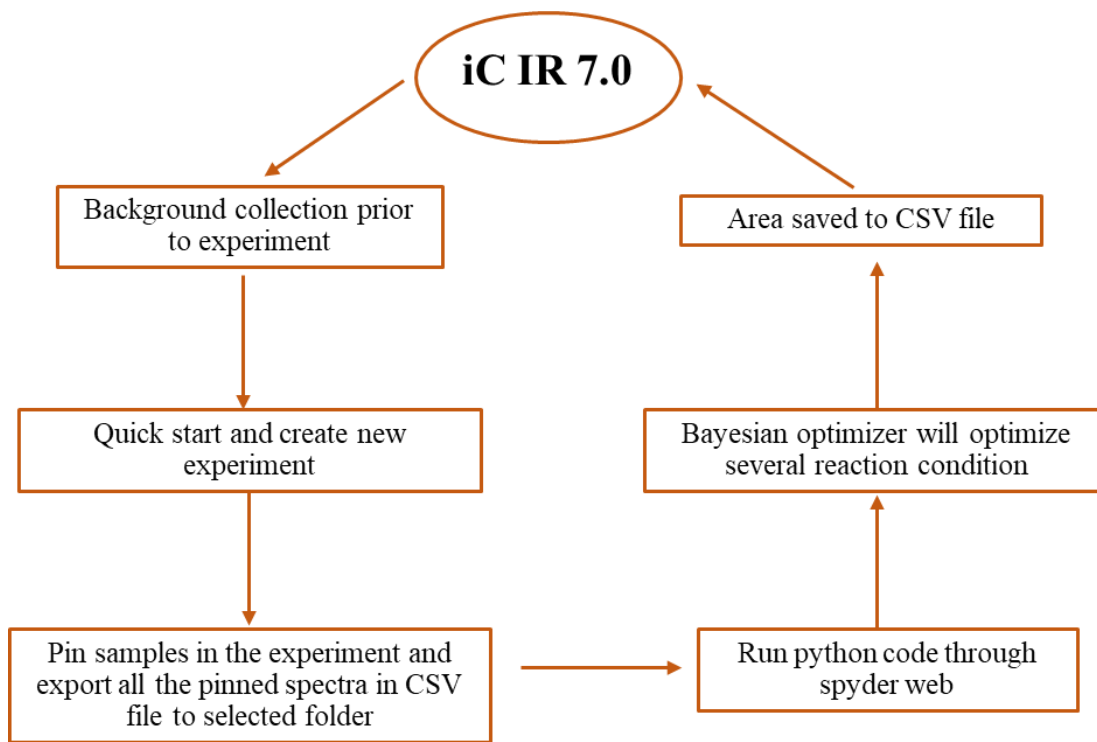

**Figure S5.** Work flow of In-line FTIR measurement when running reaction optimization.

#### S2.2.4. Collection module.

We employed a commercially accessible 3D printer as an automated collector. The Python program on the central system interfaced with the 3D printer and give commands to the stepper motors on the X, Y, and Z axis of the printer for movement. This information is transmitted via USB serial communication. PFA tubing (od = 1/16, id = 1mm) is connected to the printer nozzle and move along x-axis, and a test tube stand is placed on the printing platform which move along Y-axis to collect the fraction of reaction mixture output (see figure S6). This configuration enables precise control of the 3D printer, facilitating tasks such as sample collection, reactor stabilization, and washing in diverse scenarios. With this 3D printer setup, we can collect maximum 22 fraction of out coming reaction mixture in one run of experiment.

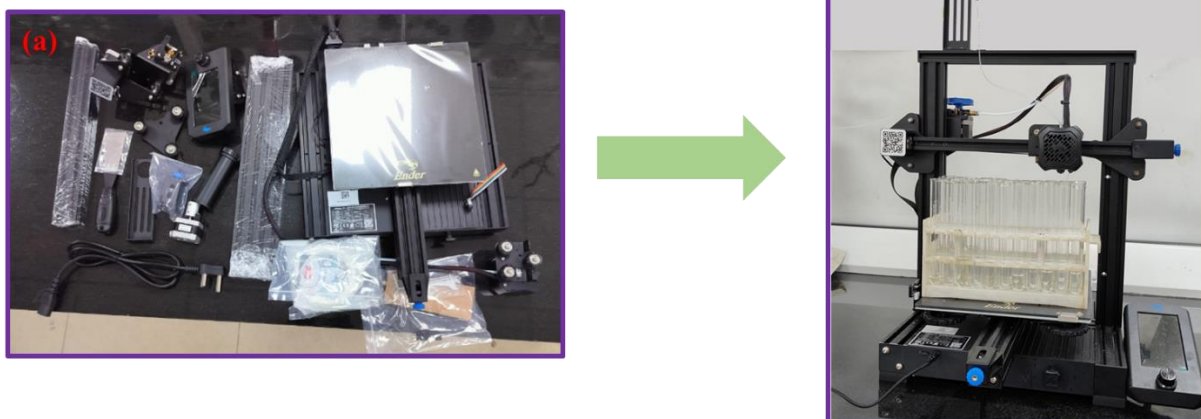

**Figure S6.** (a) Original photograph of dismantle 3D printer; (b) assembled photograph of 3D printer as auto-fraction collector.

### S2.3. Automated system software

**Table S2.** List of the software required for the automated system.

| Type        | Version      | Function                         |
|-------------|--------------|----------------------------------|
| Windows 10  | Professional | Control system                   |
| Python      | 3.9, 32-bit  | Control of platform              |
| Spyder web  | 3.7          | run Bayesian Optimizer algorithm |
| Arduino IDE | 1.8.19       | Control temperature              |
| iC IR       | 7.0          | Control benchtop In-line FTIR    |

## S2.4. Bayesian optimization

The machine learning algorithm utilized in this project is Bayesian Optimization (BO), implemented through the open-source package. Bayesian optimization is an algorithm which uses Baye's theorem to find the maximum of objective. It is a robust machine learning technique, especially suited for optimizing chemical reactions during the initial phases of process development its efficiency lies in the ability to navigate extensive reaction spaces effectively, forecasting optimal reaction conditions with high yields by assessing only a limited number of experiments. The selected initial points are the variable space (reaction conditions), the objectives to attain (e.g., maximize yield and/or conversion, minimize costs), the total number of experiments to perform, the information of communication port (e.g., pump = COM 7, printer = COM 9) and the overall experimental cost (indication how many cycles of experiment to be performed in each run). The initial points are chosen through Latin hypercube sampling for Euclidean and integral variables, while for discrete numeric values, selection is done uniformly at random. The variable space encompasses the range within which the objective is intended to be optimized. It accommodates both discrete and continuous variables. In Bayesian optimization incorporation of multiple variables of the same type (in a single line, as in String varA, varB, varC) is feasible, leaving the determination of the most effective among them to the model. Each time the BO calls the objective function, the platform is run, and the parameter settings are sent to the platform. The model then waits until the result is sent back before updating and deciding on the next experiment.

**S2.4.1.** Step-by-step instructions for setting up the experiments and operating the automated system.

### **Step 1**

Background collection: This marks the beginning of our new experiment. We'll start by selecting the wavenumber range and then proceed to click on "collect background." It's crucial to ensure

that our solvent is running through the In-line IR. Upon clicking "collect background," a new dialogue box will appear, where we'll select 128 scans and proceed to collect the background.

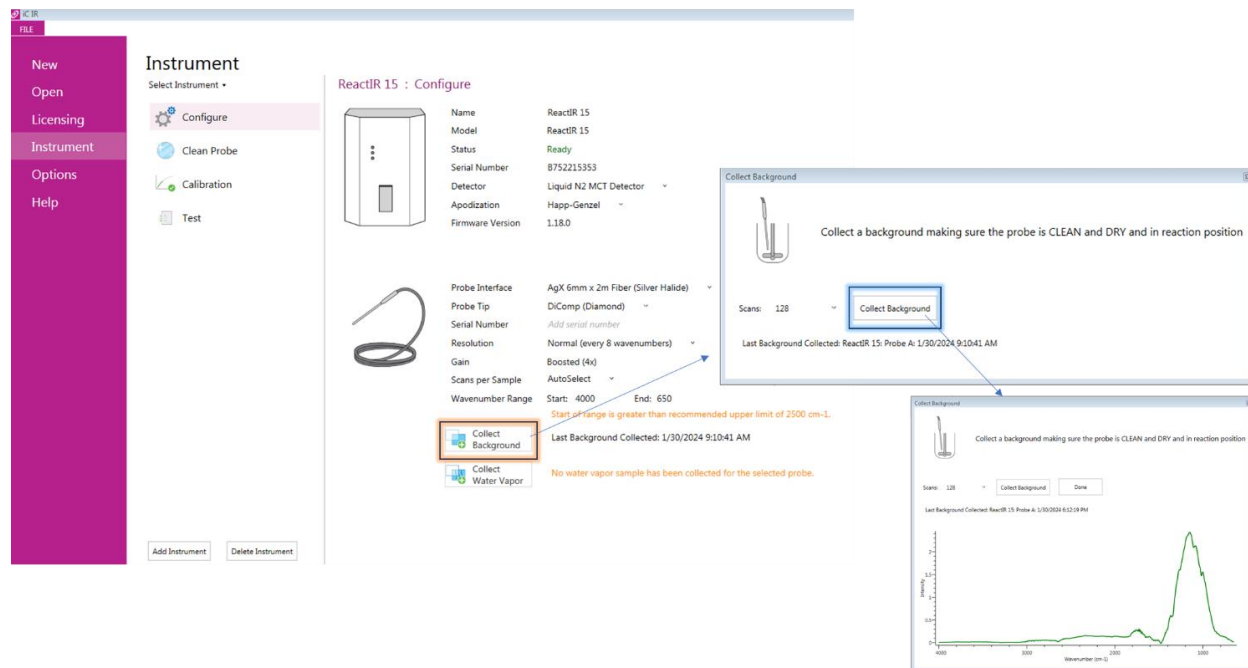

**Figure S7.** Home page of the iC IR 7.0 containing step-by-step instructions on how to take solvent background before starting experiment.

## Step 2

After background collection create new experiment by clicking on tab this dialogue box will appear.

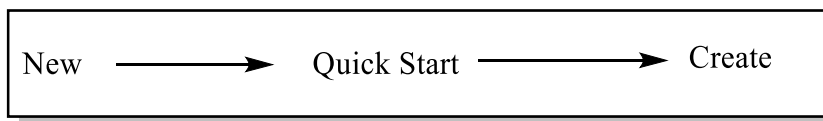

Type your experiment name and select the folder to save your experiment at your desired location then select duration (1h-2day) and scan of sample interval (15sec) for one run.

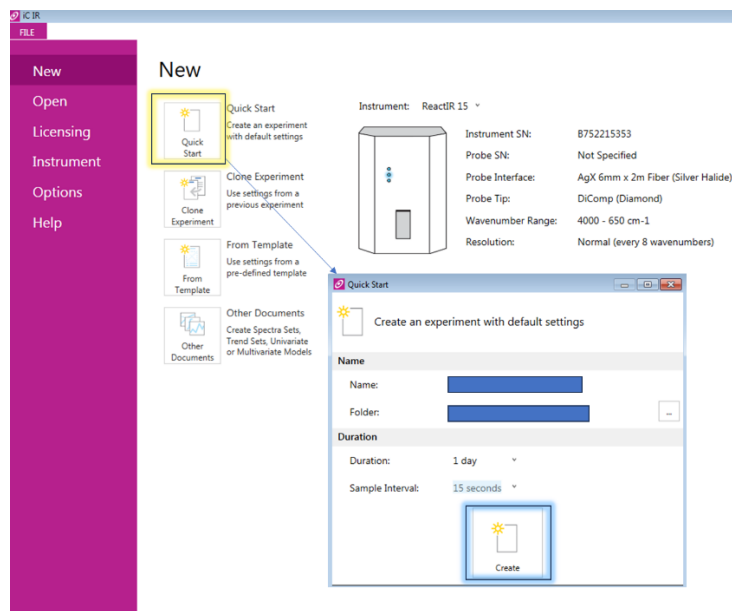

**Figure S8.** User Settings page, where the name of the experiments, folder and the location they are saved to are defined.

### Step 3

Upon creating the new experiment, you'll encounter this dialogue box. Firstly, **(a)** pin all the samples by clicking on "smart pin," followed by clicking on "pin 6 samples." Secondly, **(b)** export all the pinned spectra by clicking on "spectra" and then exporting all the files in CSV format only, which will be in an Excel file. Thirdly, **(c)** after clicking on "export," a new dialogue box will appear showing all the CSV files exported from the In-line IR. Create a text document in that folder and save it with a AB.py extension to save the Python code.

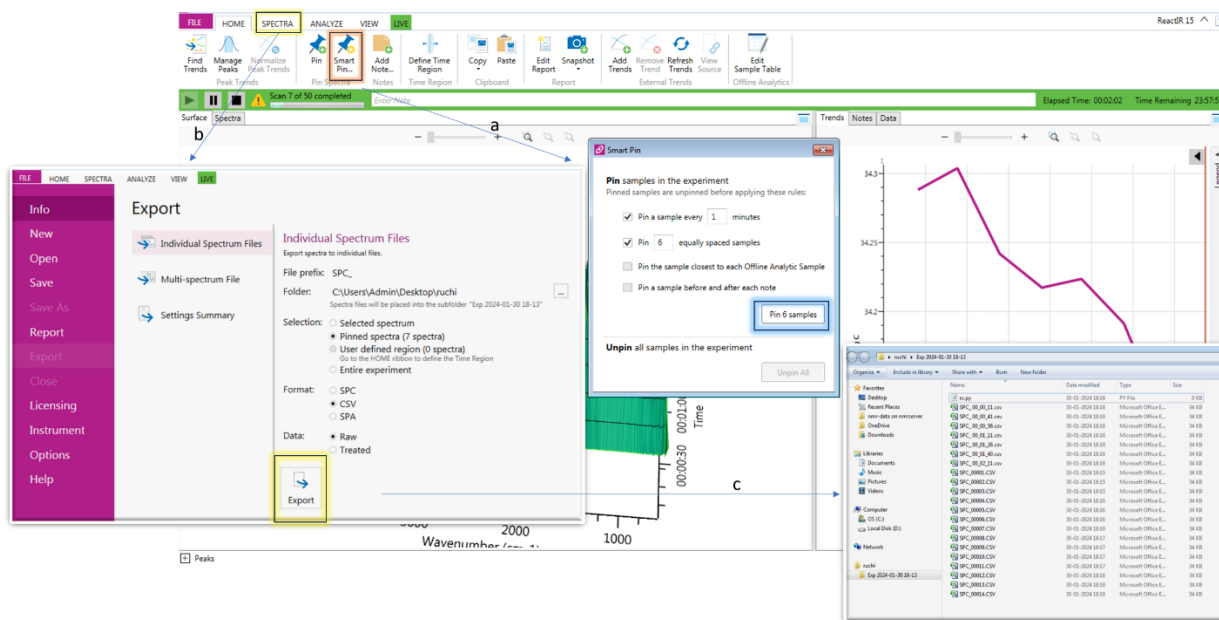

**Figure S9.** User Settings page, where in first step (a) pin all the sample, in second step (b) export spectrum file in CSV format and in third step (c) you can see all the spectrum file in excel format.

## Step 4

Open spyder web app in central system where we will write our python code or open the previously saved python code. In this python code we have to define path in **mypath** and then we write the communication port for syringe pump, power supply and auto collector. Then we will give reaction condition variable such as flow rate (residence time), voltage, current and select no of cycles (1-22) in one run.

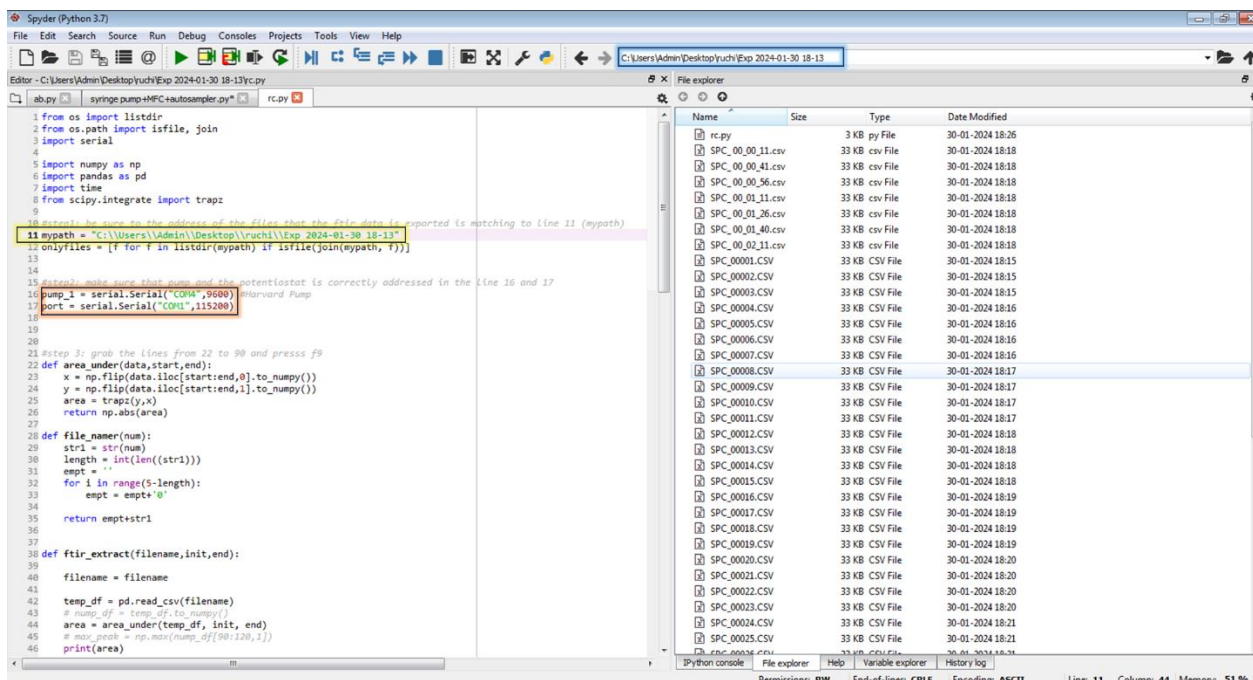

**Figure S10.** Reaction parameter settings page, where you will define the file path and communication port with the instruments attached to central system.

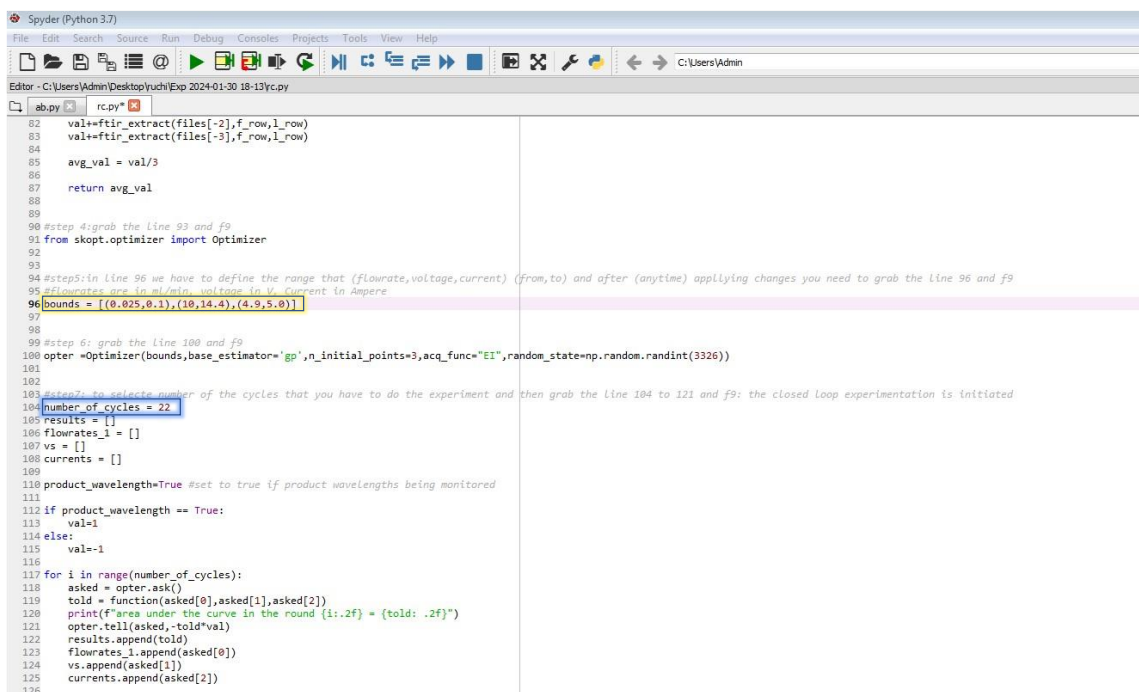

**Figure S11.** Reaction parameter settings page, where you will define the boundary of flow rate, voltage, current and communication port with the instruments attached to central system.

|    | A  | B        | C        | D        | E              | F      | G | H | I | J | K | L | M | N | O | P | Q | R | S | T | U | V | W | X |
|----|----|----------|----------|----------|----------------|--------|---|---|---|---|---|---|---|---|---|---|---|---|---|---|---|---|---|---|
| 1  |    | flowrate | voltages | currents | area-resulwatt |        |   |   |   |   |   |   |   |   |   |   |   |   |   |   |   |   |   |   |
| 2  | 0  | 0.102368 | 14.08762 | 4.968193 | 0.08926        | 65.321 |   |   |   |   |   |   |   |   |   |   |   |   |   |   |   |   |   |   |
| 3  | 1  | 0.104702 | 14.27705 | 4.963058 | 0.054675       | 68.01  |   |   |   |   |   |   |   |   |   |   |   |   |   |   |   |   |   |   |
| 4  | 2  | 0.112409 | 14.2009  | 4.941309 | 0.111543       | 67.218 |   |   |   |   |   |   |   |   |   |   |   |   |   |   |   |   |   |   |
| 5  | 3  | 0.066445 | 14.47059 | 4.901553 | 0.114956       | 70.786 |   |   |   |   |   |   |   |   |   |   |   |   |   |   |   |   |   |   |
| 6  | 4  | 0.125    | 14       | 4.9      | 0.025144       | 69.682 |   |   |   |   |   |   |   |   |   |   |   |   |   |   |   |   |   |   |
| 7  | 5  | 0.066    | 14.39582 | 5        | 0.049361       | 69.801 |   |   |   |   |   |   |   |   |   |   |   |   |   |   |   |   |   |   |
| 8  | 6  | 0.066156 | 14.49334 | 4.902017 | 0.138695       | 70.825 |   |   |   |   |   |   |   |   |   |   |   |   |   |   |   |   |   |   |
| 9  | 7  | 0.125    | 14.5     | 5        | 0.096633       | 71.413 |   |   |   |   |   |   |   |   |   |   |   |   |   |   |   |   |   |   |
| 10 | 8  | 0.066    | 14.16656 | 4.905818 | 0.045791       | 65.241 |   |   |   |   |   |   |   |   |   |   |   |   |   |   |   |   |   |   |
| 11 | 9  | 0.069702 | 14.5     | 4.901639 | 0.11917        | 70.892 |   |   |   |   |   |   |   |   |   |   |   |   |   |   |   |   |   |   |
| 12 | 10 | 0.124355 | 14.5     | 4.929517 | 0.097555       | 71.456 |   |   |   |   |   |   |   |   |   |   |   |   |   |   |   |   |   |   |
| 13 | 11 | 0.125    | 14.27383 | 4.930149 | 0.037493       | 68.225 |   |   |   |   |   |   |   |   |   |   |   |   |   |   |   |   |   |   |
| 14 | 12 | 0.066    | 14       | 4.982374 | 0.106264       | 63.896 |   |   |   |   |   |   |   |   |   |   |   |   |   |   |   |   |   |   |
| 15 | 13 | 0.082366 | 14       | 4.906796 | 0.025258       | 63.644 |   |   |   |   |   |   |   |   |   |   |   |   |   |   |   |   |   |   |
| 16 | 14 | 0.124833 | 14.13302 | 5        | 0.059424       | 65.357 |   |   |   |   |   |   |   |   |   |   |   |   |   |   |   |   |   |   |
| 17 | 15 | 0.105972 | 14.5     | 4.943228 | 0.091063       | 70.934 |   |   |   |   |   |   |   |   |   |   |   |   |   |   |   |   |   |   |
| 18 | 16 | 0.094977 | 14.5     | 4.9      | 0.113633       | 70.818 |   |   |   |   |   |   |   |   |   |   |   |   |   |   |   |   |   |   |
| 19 | 17 | 0.066536 | 14       | 5        | 0.076992       | 70.673 |   |   |   |   |   |   |   |   |   |   |   |   |   |   |   |   |   |   |
| 20 | 18 | 0.115403 | 14.5     | 4.9      | 0.141776       | 70.629 |   |   |   |   |   |   |   |   |   |   |   |   |   |   |   |   |   |   |
| 21 | 19 | 0.087432 | 14.00118 | 4.95748  | 0.099524       | 63.033 |   |   |   |   |   |   |   |   |   |   |   |   |   |   |   |   |   |   |
| 22 | 20 | 0.094102 | 14.5     | 4.9      | 0.252021       | 70.557 |   |   |   |   |   |   |   |   |   |   |   |   |   |   |   |   |   |   |
| 23 | 21 | 0.106282 | 14.49823 | 4.999693 | 0.233256       | 71.301 |   |   |   |   |   |   |   |   |   |   |   |   |   |   |   |   |   |   |
| 24 |    |          |          |          |                |        |   |   |   |   |   |   |   |   |   |   |   |   |   |   |   |   |   |   |

**Figure S12.** Example layout on excel file automatically generated from iC IR and bayesian optimizer.



**S2.4.2.** General Procedure for optimization with automated system.

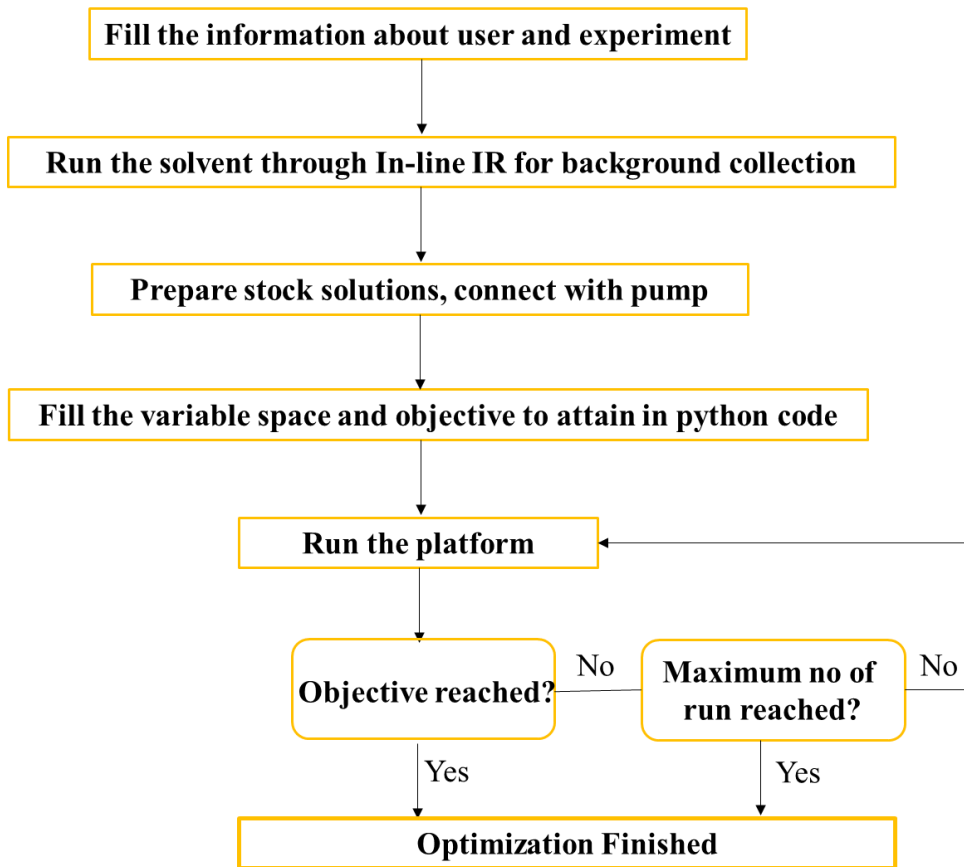

**List of starting material (2a-2g):** Previously, reported protocol has been used to synthesized the diazo-compound.<sup>1</sup>

---

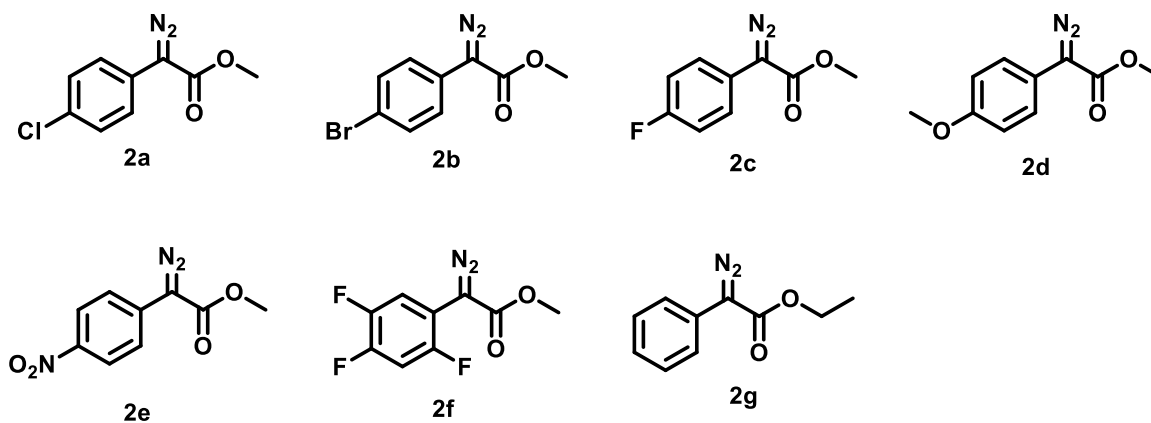

**Figure S13.** Starting material diazo ester reported earlier.

**Table S3.** Literature study of the probable molecules of product and their corresponding reported known molecule.

| Starting material                                                                               | Substrate                                                                                             | product                                                                                      | Probable molecule                         | Reported molecule |
|-------------------------------------------------------------------------------------------------|-------------------------------------------------------------------------------------------------------|----------------------------------------------------------------------------------------------|-------------------------------------------|-------------------|
| 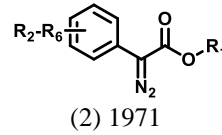<br>(2) 1971   | <br>(3) 1,159,909    | <br>(4)    | 1971 ×<br>1159909 =<br>2,286,180,639      | 5675              |
| <br>(2) 1971   | <br>(5) 31,582       | <br>(6)    | 1971 × 31582<br>= 62,248,122              | 2590              |
| <br>(2) 1971   | <br>(7) 666,981      | <br>(8)    | 1971 × 666981<br>=<br>1,314,619,551       | 2410              |
| <br>(2) 1971  | <br>(9) 64,464      | <br>(10)  | 1971 × 64464<br>= 127,058,544             | 954               |
| <br>(2) 1971 | <br>(11) 46,269    | <br>(12) | 1971 × 46269<br>= 91,196,199              | 396               |
| <br>(2) 1971 | <br>(13) 5,467,743 | <br>(14) | 1971 ×<br>5646743 =<br>11,129,730,45<br>3 | 385               |
| <br>(2) 1971 | <br>(15) 133666    | <br>(16) | 1971 × 133666<br>= 263,455,686            | 113               |
| <b>Total no of probable molecule = 1.5 × 10<sup>10</sup></b>                                    |                                                                                                       |                                                                                              |                                           |                   |
|                                                                                                 |                                                                                                       |                                                                                              | <b>Total no of known molecule = 12523</b> |                   |

\* Data extracted from Reaxys on 07 march 2024

$$\% \text{ known molecule} = \frac{12523}{15000000000} \times 100$$

$$= \sim 0.00000083\%$$

### **S3 Case study-1 carbene insertion (C-O bond formation) single objective multi-variant auto-optimization.**

#### **S3.1. Background collection**

The collection of solvent background or an air background before automated experiment stand out as most important step in obtaining finest quality infrared data from a fully operational React IR 15. Each sample measurement will use the background to 'ratio out' all infrared absorbing materials in the optical path and the source solvent peaks. It will give infrared fingerprint end-result in form of absorbance versus wavenumber of only the reaction mixture components. For background collection set the scan to 128 scans at 4 cm<sup>-1</sup> resolutions.

**Sample preparation:** We prepared 0.5 M stock solutions of compound **2a**, reagent **3a**, and product **4a** in ethyl acetate, with each solution loaded into separate syringes. Our analysis utilized an In-line FTIR system. The experimental procedure began by introducing ethyl acetate solvent using a syringe pump for 10 min, during which data was recorded. Subsequently, the stock solution of compound **2a** was introduced into the In-line FTIR for another 10 minutes. This process was repeated for the reaction product **4a** and reagent **3a**, each pumped for 10 minutes. After collecting all relevant data, we identified the signature peak present in the product. Using this peak as a reference, we employed a Bayesian optimizer to fine-tune and optimize the reaction conditions for improved results.

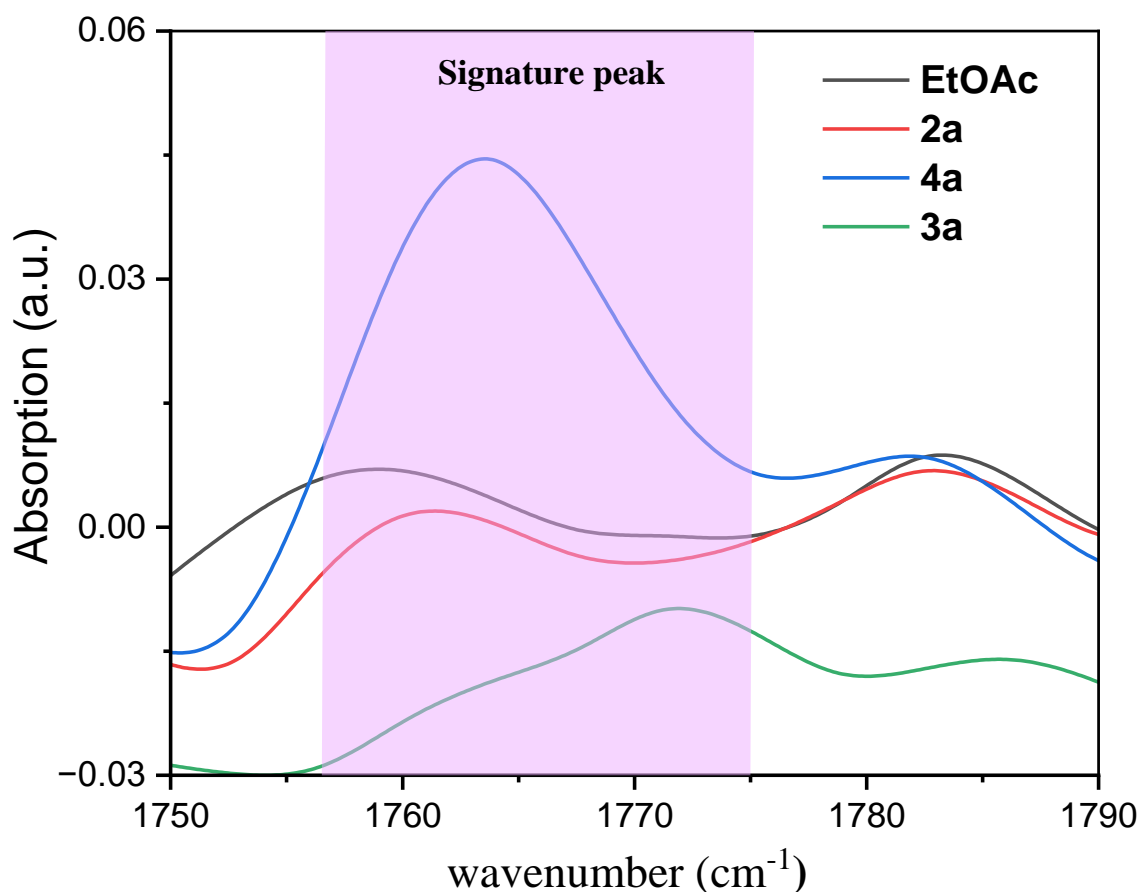

**Figure S14.** In-line IR background analysis of EtOAc, 0.5 M stock solution of **2a**, **3a**, and **4a** in EtOAc.

The distinctive keto peak associated with benzoic acid (**3a**) in the initial substrate undergoes a noticeable shift in the resulting product (**4a**), aligning within the range of 1756 to 1775  $\text{cm}^{-1}$ . This specific peak, falling within this range, is designated as the signature peak for our analysis. During the optimization of the reaction through Bayesian methods, this signature peak serves as a pivotal reference point. We utilize it to calculate the area under the curve in the In-line FT-IR spectra, providing a quantitative measure of the area in the forthcoming reaction mixture.

**Micro reactor system:** As shown in Figure. S2d, we had utilized pump to deliver the solution at varied flow rates. Stock solution starting material and reagent were introduced through a T-mixer with the same flow rate to maintain a stoichiometric ratio. Subsequently, they passed through a PFA tubing (od 1/16, id 1mm, l = 1.3 m, vol = 1 mL) for the carbene insertion reaction. The cylindrical reactor was enveloped by cylindrical blue light LED for irradiation. To enhance light absorption, the entire reactor was covered with aluminum foil.

### **S3.2. General procedure for the auto-optimized synthesis of compound 3a.**

In our approach we are employing a python-coded based Bayesian optimization strategy for further refinement. Initial steps involved the preparation of stock solutions for compound **2a** (0.1 M in EtOAc) and reagent **3a** (0.2 M in EtOAc), each filled into separate syringes and connected to a syringe pump. The solutions were then directed through a PFA tubular reactor (inner diameter = 1 mm, length = 1.3 m, volume = 1 mL) surrounded by a cylindrical-shaped blue LED light source. Once the solution setup was complete, input ranges for variable flow rates, voltages, and current were specified in the Python code designed for the reaction. The Bayesian optimizer systematically explored these varying reaction conditions, aiming to achieve maximum yield. The optimization process involved running 50-60 experiments in a 24 h time frame, and the results were tabulated in the optimization table (Table S4).

### S3.2.1. Python code for optimizing condition of carbene insertion reaction (C-O bond formation).

```
ab1.py x
1 from os import listdir
2 from os.path import isfile, join
3 import serial
4
5 import numpy as np
6 import pandas as pd
7 import time
8 from scipy.integrate import trapz
9
10 #step1: be sure to the address of the files that the ftir data is exported is matching to line 11 (mypath)
11 mypath = "C:\\Users\\Admin\\Desktop\\ruchi\\Exp 2023-09-22 14-27"
12 onlyfiles = [f for f in listdir(mypath) if isfile(join(mypath, f))]
13
14
15 #step2: make sure that pump and the potentiostat is correctly addressed in the line 16 and 17
16 pump_1 = serial.Serial("COM4",9600) #Harvard Pump
17 port = serial.Serial("COM1",115200)
18 printer = serial.Serial("COM10", 115200, timeout=1)
19
20
21
22 #step 3: grab the lines from 22 to 90 and press f9
23 def area_under(data,start,end):
24     x = np.flip(data.iloc[start:end,0].to_numpy())
25     y = np.flip(data.iloc[start:end,1].to_numpy())
26     area = trapz(y,x)
27     return np.abs(area)
28
29 def file_namer(num):
30     str1 = str(num)
31     length = int(len((str1)))
32     empt = ''
33     for i in range(5-length):
34         empt = empt+'0'
35
36     return empt+str1
37
38
39 def ftir_extract(filename,init,end):
40
41     filename = filename
42
43     temp_df = pd.read_csv(filename)
44     # nump_df = temp_df.to_numpy()
45     area = area_under(temp_df, init, end)
46     # max_peak = np.max(nump_df[90:120,1])
47     print(area)
```

```

48
49     return area
50
51
52 def function(flowrate_1,v,i):
53
54     #set the pumps with the flowrate as the desired flowrate for the function
55
56     fr_1 = flowrate_1 #ml/min
57     pump_1.write(('irate '+str(fr_1)+' ml/min\r\n').encode())
58
59     time.sleep(0.1)
60
61     #set the com port for potentiostat and set the voltage and current
62     vol = v
63     curr = i
64     port.write(('VOLT '+str(vol)+'\r\n').encode()) #to change the voltge we need to use "VOLT 1" command
65     port.write(('CURR '+str(curr)+'\r\n').encode()) #to change the current we need to use "CURR 1" command
66
67
68     #pumps run
69     pump_1.write((b'irun\r\n'))
70     time.sleep(0.1)
71     time.sleep(3636)
72
73 def function2(flowrate_1,v,i):
74     time.sleep(180)
75
76     files = [f for f in listdir(mypath) if isfile(join(mypath, f))]
77
78     val = 0
79
80     #change wavelengths as per product here.
81     f_row=21 #first row of range for wavelength as per IR CSV
82     l_row=28 #last row of range for wavelength as per IR CSV
83
84     val += ftir_extract(files[-1],f_row,l_row)
85     val+=ftir_extract(files[-2],f_row,l_row)
86     val+=ftir_extract(files[-3],f_row,l_row)
87
88     avg_val = val/3
89
90     return avg_val
91
92
93 #step 4:grab the line 93 and f9
94 from skopt.optimizer import Optimizer

```



```

95
96
97 #step5:in line 96 we have to define the range that (flowrate,voltage,current) (from,to) and after (anytime) applying changes you need to grab the line 96 and f9
98 #flowrates are in ml/min, voltage in V, Current in Ampere
99 bounds = [(0.05,0.125),(10,14.5),(4.9,5.0)]
100
101
102 #step 6: grab the line 100 and f9
103 opter =Optimizer(bounds,base_estimator='gp',n_initial_points=3,acq_func="EI",random_state=np.random.randint(3326))
104
105
106 #step7: to selecte number of the cycles that you have to do the experiment and then grab the line 104 to 121 and f9: the closed loop experimentation is initiated
107 number_of_cycles = 22
108 results = []
109 flowrates_1 = []
110 vs = []
111 currents = []
112
113 product_wavelength=True #set to true if product wavelengths being monitored
114
115 if product_wavelength == True:
116     val=1
117 else:
118     val=-1
119
120
121 # Step 8: Test Tubes on Printer
122 USE_PRINTER = True
123 REST_HEIGHT = 200
124 X_HOME = -5
125 Y_HOME = 20
126 Z_HOME = 175
127 DEFAULT_PUMP_TIME="1"
128 # Distance between test tubes
129 X_SPACING=20
130 Y_SPACING=20
131 # Number of test tubes
132 X_ROWS = 11
133 Y_COLUMNS = 4
134
135 def send_cmd(cmd):
136     print(cmd)
137     printer.write(f"{cmd}\n".encode("ASCII"))
138
139 def move(x=None, y=None, z=None):

```

```

140 s = "G0"
141 if x is not None:
142     s += f"X{x}"
143 if y is not None:
144     s += f"Y{y}"
145 if z is not None:
146     s += f"Z{z}"
147
148 s+= "F5000"
149 send_cmd(s)
150
151 def printer_positions():
152     for j in range(Y_COLUMNS):
153         for i in range(X_ROWS):
154             if j%2==1:
155                 yield (X_HOME + (X_ROWS - 1 - i) * X_SPACING, Y_HOME + j * Y_SPACING, Z_HOME)
156             else:
157                 yield (X_HOME + i * X_SPACING, Y_HOME + j * Y_SPACING, Z_HOME)
158
159 # Run this.
160 tube_location = list(printer_positions())
161
162
163 for i in range(number_of_cycles):
164     move(*tube_location[2*i])
165     asked = opter.ask()
166     function(asked[0],asked[1],asked[2])
167     move(*tube_location[2*i+1])
168     told = function2(asked[0],asked[1],asked[2])
169
170     print(f"area under the curve in the round {i:.2f} = {told: .2f}")
171     opter.tell(asked,-told*val)
172     results.append(told)
173     flowrates_1.append(asked[0])
174     vs.append(asked[1])
175     currents.append(asked[2])
176
177     dict1 = {"flowrate_1":flowrates_1,"voltages":vs, "currents":currents,"area-results":results}
178     df2 = pd.DataFrame(dict1)
179     df2.to_csv("output round "+str(i)+".csv")
180
181
182
183 pump_1.write(b'stop\r\n')
184
185
186

```

**Table S4.** Auto-optimization table of carbene insertion reaction into O-H bonds of carboxylic acid.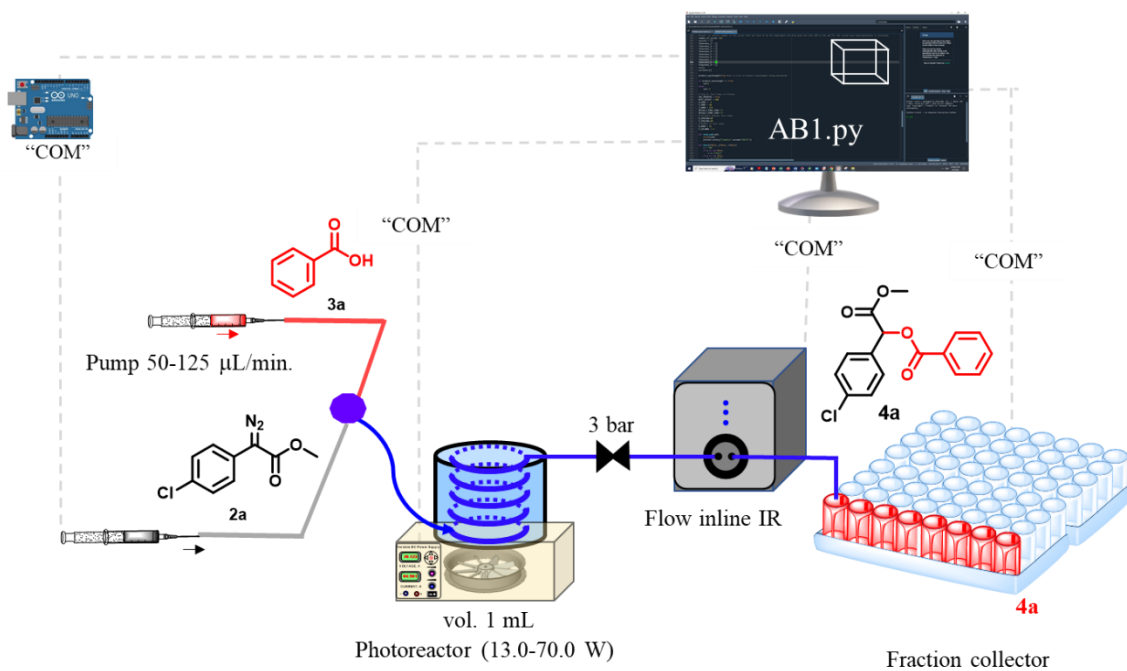

| No. of experiments | Flow rate mL/min | Voltage (V) | Light intensity (W) | area-results | Yield (%) | Space time yield (g mL <sup>-1</sup> h <sup>-1</sup> ) |
|--------------------|------------------|-------------|---------------------|--------------|-----------|--------------------------------------------------------|
| 1                  | 0.066608         | 10.882021   | 24.45               | 0.088501     | 22.30199  | 0.013547726                                            |
| 2                  | 0.029862         | 14.306068   | 65.808              | 0.200355     | 50.48887  | 0.013750297                                            |
| 3                  | 0.065704         | 12.421805   | 40.39               | 0.171524     | 43.22355  | 0.025900525                                            |
| 4                  | 0.099795         | 10.154336   | 16.488              | 0.227276     | 57.27289  | 0.052125911                                            |
| 5                  | 0.075772         | 13.720454   | 57.344              | 0.256559     | 64.65212  | 0.044677424                                            |
| 6                  | 0.041725         | 10          | 13.469              | 0.019331     | 4.871431  | 0.001853775                                            |
| 7                  | 0.046836         | 11.089352   | 24.981              | 0.097945     | 24.68185  | 0.010542825                                            |
| 8                  | 0.095982         | 10          | 13.83               | 0.026577     | 6.697226  | 0.005862467                                            |
| 9                  | 0.098594         | 14.4        | 66.616              | 0.381375     | 96.10539  | 0.086416489                                            |
| 10                 | 0.027592         | 13.123195   | 49.103              | 0.092042     | 23.19437  | 0.005836805                                            |
| 11                 | 0.094381         | 12.699958   | 43.77               | 0.071        | 17.89184  | 0.015400604                                            |
| 12                 | 0.1              | 13.164905   | 49.799              | 0.270311     | 68.11758  | 0.062123235                                            |
| 13                 | 0.025            | 12.628105   | 42.957              | 0.135531     | 34.15342  | 0.007786979                                            |
| 14                 | 0.040461         | 13.437396   | 53.558              | 0.200978     | 50.64587  | 0.01868879                                             |

|    |          |           |        |          |          |             |
|----|----------|-----------|--------|----------|----------|-------------|
| 15 | 0.076298 | 12.251856 | 38.395 | 0.12583  | 31.70879 | 0.022064265 |
| 16 | 0.090613 | 12.933006 | 46.788 | 0.166475 | 41.95121 | 0.034668386 |
| 17 | 0.028235 | 10        | 15.458 | 0.039305 | 9.904745 | 0.002550535 |
| 18 | 0.061374 | 14.4      | 67.262 | 0.330339 | 83.24446 | 0.046594855 |
| 19 | 0.102368 | 14.08762  | 62.363 | 0.08926  | 22.49326 | 0.077462861 |
| 20 | 0.104702 | 14.27705  | 65.017 | 0.054675 | 13.77794 | 0.08534457  |
| 21 | 0.119409 | 14.2009   | 63.843 | 0.111543 | 28.10851 | 0.074518828 |
| 22 | 0.066445 | 12.17059  | 37.334 | 0.114956 | 28.96858 | 0.017554331 |
| 23 | 0.125    | 11.8592   | 33.843 | 0.025144 | 6.336214 | 0.007223285 |
| 24 | 0.066    | 13.39582  | 52.746 | 0.099361 | 25.03868 | 0.015071283 |
| 25 | 0.056156 | 14.49334  | 68.059 | 0.238695 | 60.15044 | 0.032096196 |
| 26 | 0.125    | 12.5      | 41.184 | 0.196633 | 49.55094 | 0.056488073 |
| 27 | 0.066    | 14.16656  | 63.265 | 0.200791 | 50.59875 | 0.035006859 |
| 28 | 0.069702 | 14.5      | 68.049 | 0.26917  | 67.83005 | 0.04311836  |
| 29 | 0.094102 | 14.5      | 67.904 | 0.379021 | 95.51218 | 0.081969534 |
| 30 | 0.124355 | 13.5      | 53.919 | 0.097555 | 24.58357 | 0.027880665 |
| 31 | 0.125    | 14.27383  | 64.7   | 0.267493 | 67.40745 | 0.076844498 |
| 32 | 0.066    | 12.9345   | 46.537 | 0.106264 | 26.77822 | 0.016118345 |
| 33 | 0.082366 | 12        | 35.361 | 0.025258 | 6.364942 | 0.004781204 |
| 34 | 0.124833 | 14.13302  | 62.821 | 0.208424 | 52.52224 | 0.065533216 |
| 35 | 0.115972 | 14.5      | 68.02  | 0.351063 | 88.46685 | 0.093568259 |
| 36 | 0.036977 | 12        | 35.328 | 0.153633 | 38.71507 | 0.013055891 |
| 37 | 0.066536 | 14        | 60.984 | 0.276992 | 69.80117 | 0.042355933 |
| 38 | 0.115403 | 14.5      | 68.081 | 0.291776 | 73.5267  | 0.077385039 |
| 39 | 0.087432 | 14.00118  | 60.736 | 0.199524 | 50.27946 | 0.046119953 |
| 40 | 0.106282 | 13.49823  | 53.844 | 0.233256 | 58.77983 | 0.05697481  |
| 41 | 0.123375 | 14.15004  | 62.812 | 0.293364 | 73.92687 | 0.083181036 |
| 42 | 0.072075 | 14.492    | 67.649 | 0.272292 | 68.61679 | 0.048416336 |
| 43 | 0.067177 | 14.00765  | 60.664 | 0.209733 | 52.8521  | 0.032380065 |
| 44 | 0.110513 | 12.11331  | 36.53  | 0.10991  | 27.697   | 0.027915211 |
| 45 | 0.120569 | 14.34578  | 66.173 | 0.279088 | 70.32936 | 0.077333411 |
| 46 | 0.089661 | 14.12967  | 55.222 | 0.258843 | 65.22768 | 0.053337216 |

|           |                 |             |               |                 |                 |                    |
|-----------|-----------------|-------------|---------------|-----------------|-----------------|--------------------|
| 47        | 0.099916        | 13.9295     | 60.131        | 0.341064        | 85.94713        | 0.078317941        |
| 48        | 0.125           | 14.5        | 68.339        | 0.285321        | 71.90006        | 0.087711599        |
| 49        | 0.027135        | 13.5        | 54.216        | 0.127316        | 32.08326        | 0.007939683        |
| 50        | 0.096834        | 13.9295     | 60.131        | 0.337922        | 85.15536        | 0.075202916        |
| 51        | 0.039347        | 13.56446    | 54.622        | 0.263359        | 66.3657         | 0.023814975        |
| 52        | 0.078418        | 14.5        | 67.875        | 0.315884        | 79.60184        | 0.056929023        |
| <b>53</b> | <b>0.099858</b> | <b>14.5</b> | <b>69.733</b> | <b>0.396378</b> | <b>99.88607</b> | <b>0.090966741</b> |
| 54        | 0.11909         | 14.1        | 62.209        | 0.247817        | 62.44916        | 0.067826082        |
| 55        | 0.082793        | 14.2        | 63.659        | 0.298597        | 75.24557        | 0.056815836        |
| 56        | 0.088865        | 14.5        | 68.005        | 0.339088        | 85.44918        | 0.07231565         |
| 57        | 0.068636        | 14.41542    | 66.722        | 0.282448        | 71.17607        | 0.044553396        |
| 58        | 0.075903        | 14          | 60.802        | 0.192995        | 48.63418        | 0.033666296        |
| 59        | 0.084141        | 14.2        | 63.801        | 0.211859        | 53.38785        | 0.040968016        |
| 60        | 0.10001         | 11.43321    | 29.232        | 0.099703        | 25.12486        | 0.022916168        |
| 61        | 0.099987        | 13.437396   | 53.422        | 0.25504         | 64.26933        | 0.058606013        |
| 62        | 0.095871        | 13.537396   | 55.717        | 0.260815        | 65.72462        | 0.057465893        |

**Reaction condition:** compound **2a** (0.1 M in EtOAc); reagent **3a** (0.2 M in EtOAc); 1 mL reactor volume.

**Graph:** We have plotted 3D graph of optimization table S4, we have taken flow rate on X-axis, blue light intensity (watt) on Y-axis and product yield on Z axis.

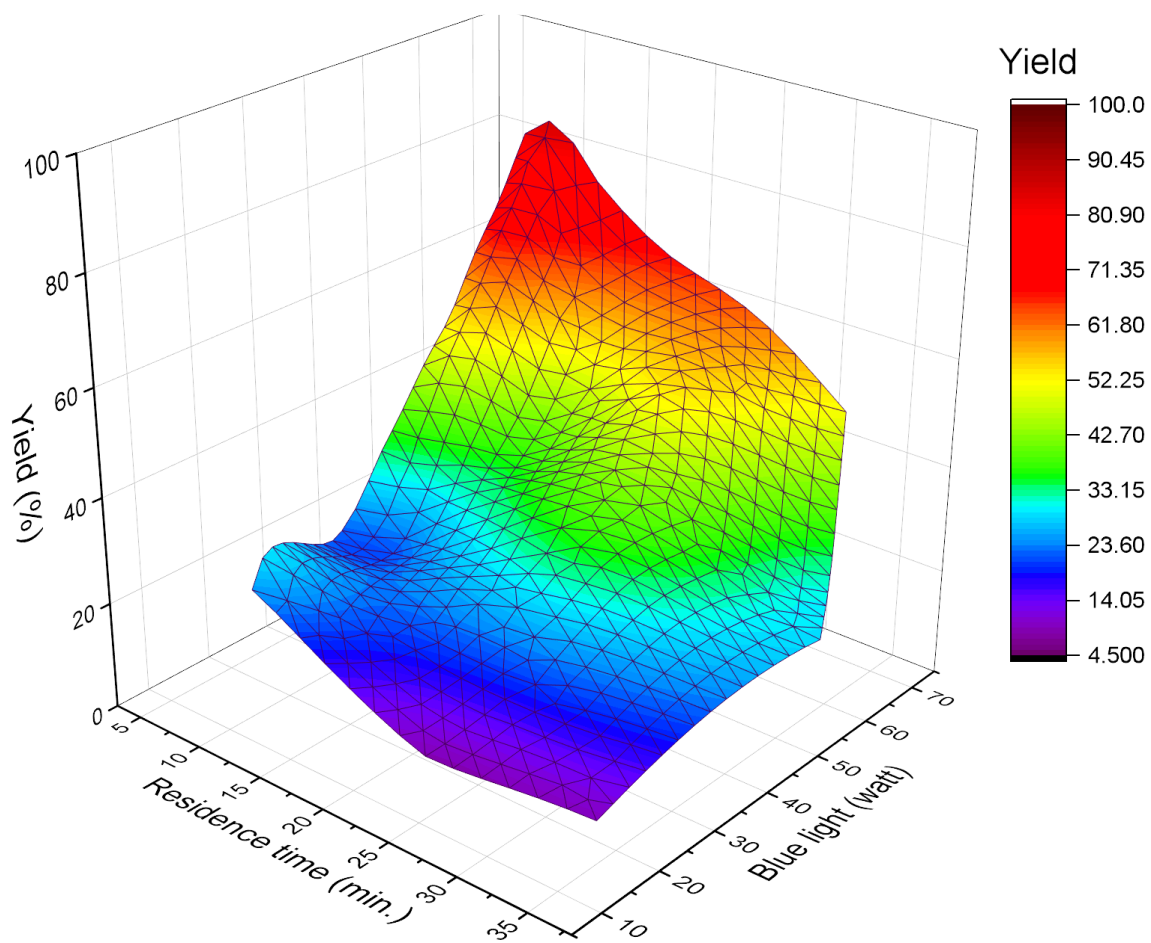

**Figure S15.** AI based system to auto-optimize and navigate this complexity and identify the optimal conditions for the photo activated C-O bond formation reaction. Compound **2a** (0.1 M in EtOAc); reagent **3a** (0.2 M in EtOAc); 1 mL reactor volume.

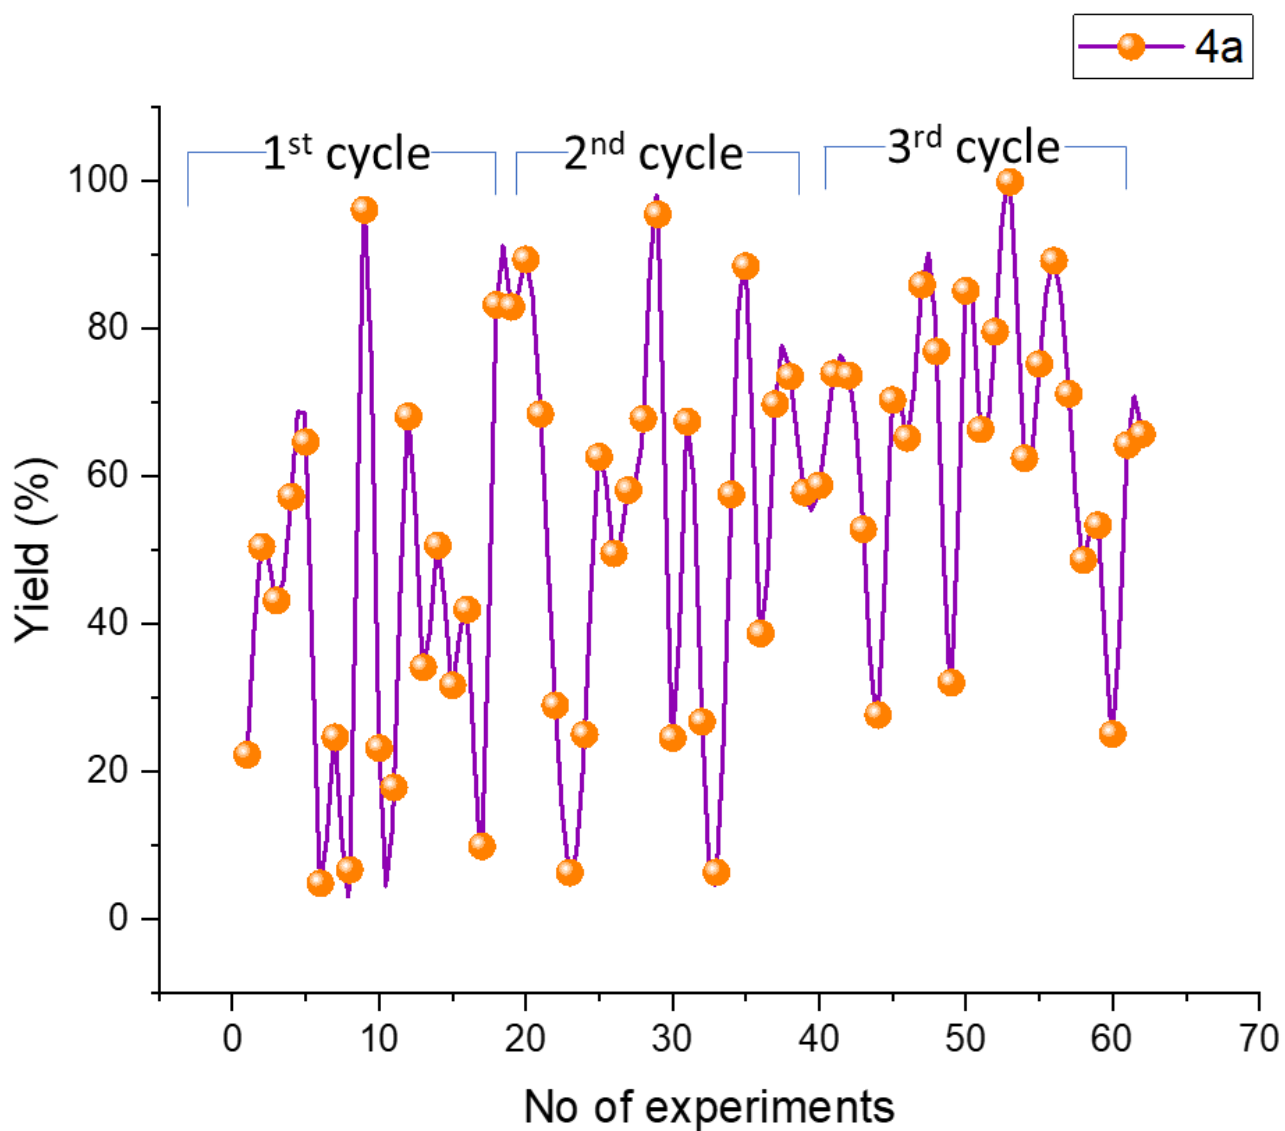

**Figure S16.** 2D graph between no of experiments performed versus yield (%) for the AI based auto-optimization of photo activated O-H reaction. Compound **2a** (0.1 M in EtOAc); reagent **3a** (0.2 M in EtOAc); 1 mL reactor volume.

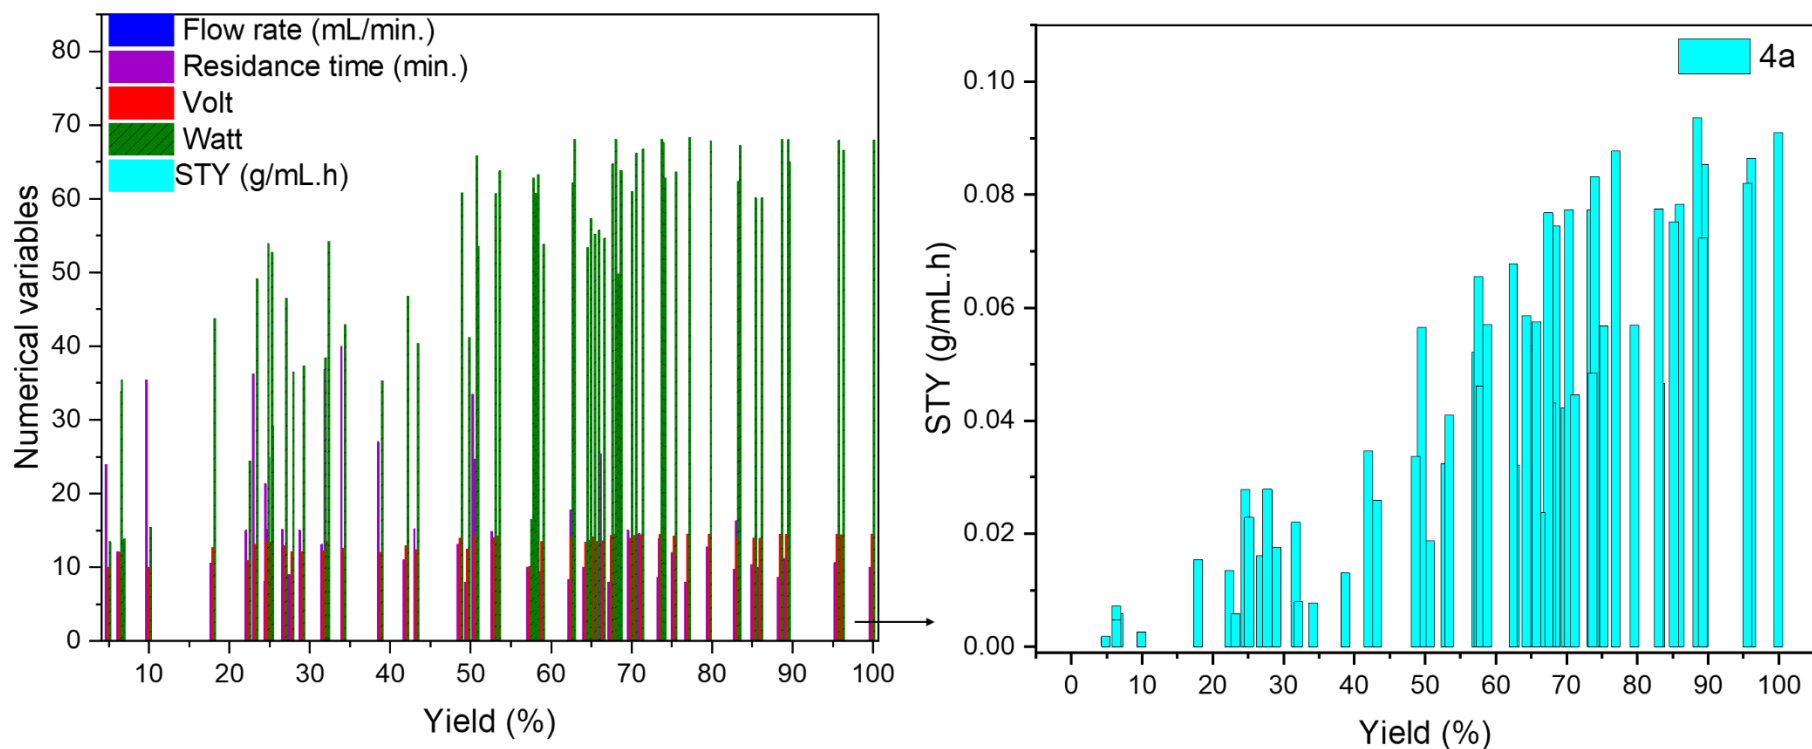

**Figure S17.** AI based system navigated multi-numerical variable complexity and identify the optimal conditions for the photo activated O-H reaction. Compound **2a** (0.1 M in EtOAc); reagent **3a** (0.2 M in EtOAc); 1 mL reactor volume.



### S3.3. Procedure for the synthesis, of compound **4a** for longer time.

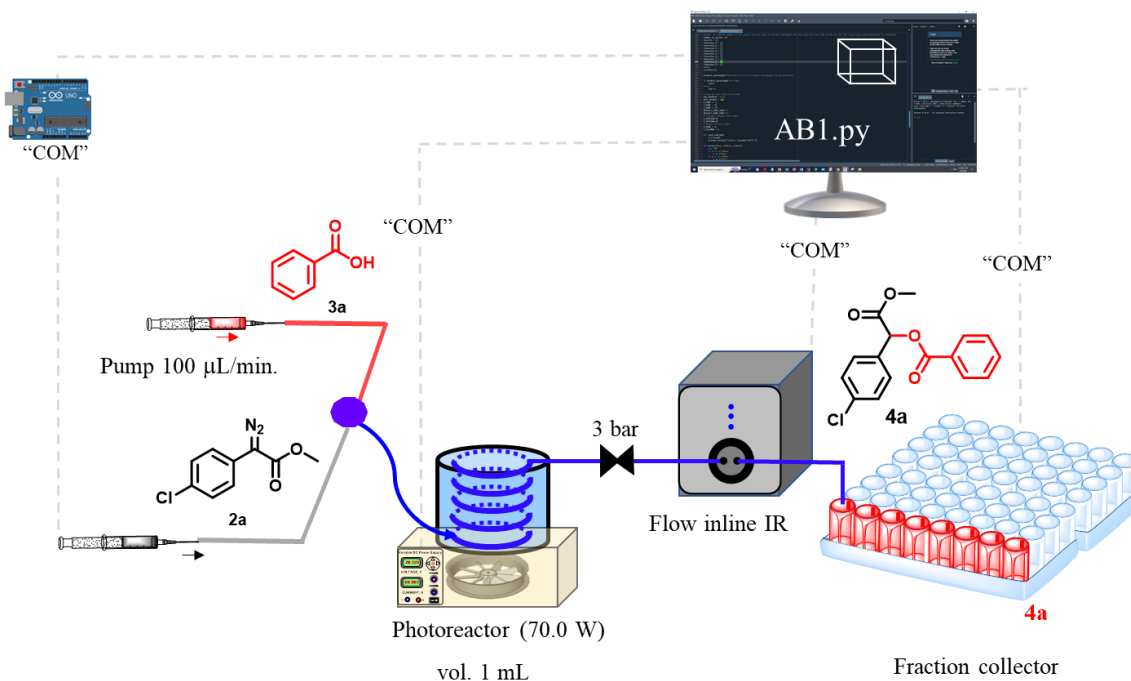

**Figure S18.** Schematic presentation of continuous flow for the synthesis, of compound **4a**.

To prepare the stock solution of compound **2a** (2.20 g, 0.01 mol) was dissolved in ethyl acetate (100 mL) charged in one syringe, another syringe charged with the reagent **3a** (2.56 g, 0.02 mol) dissolved in ethyl acetate (100 mL). These two syringes connected via pump and out-put is further connected with the T<sub>1</sub>-mixer. Both syringes were running with the 50 µL/min. flow rate each to maintain the stoichiometry and then passed through PFA tubular reactor (id = 1000 µm, l = 1.3 m, vol. = 1 mL) under blue light (70 W) exposure. The room temperature of the reactor was controlled by fan attached to the bottom of the photochemical reactor. The out-put of the tubular reactor was connected with spring based back pressure regulator (~3 bar) to maintain the evaporation. Then out coming first one hour of the product mixture **4a** was discarded and next 5 h of the product mixture [30 mL; **2a** (0.32 g)] was collected in HPLC bottle. The EtOAc reaction mixture washed it with 10% aq. NaOH and separated through the separating funnel. The organic EtOAc phase was concentrated under reduced pressure to give the product **4a** (0.45 g in 5 h, 99.88%) as a colorless oil. <sup>1</sup>H NMR (400 MHz, CDCl<sub>3</sub>) δ 8.12

– 8.10 (m, 2H), 7.60 – 7.51 (m, 3H), 7.47 – 7.38 (m, 4H), 6.15 (s, 1H), 3.74 (s, 3H). **<sup>13</sup>C NMR (126 MHz, CDCl<sub>3</sub>)** δ 168.97, 165.71, 135.36, 133.65, 132.55, 129.99, 129.14, 129.03, 128.55, 74.14, 52.82. **IR (ν<sub>max</sub>):** 3023.51, 1754.46, 1724.80, 1255.08, 815.32 cm<sup>-1</sup>. **HRMS (ESI):** *m/z* calcd for C<sub>16</sub>H<sub>14</sub>ClO<sub>4</sub> [M+H]<sup>+</sup> 305.7335, found 305.7332.

### Space time yield in previous reported batch process<sup>2</sup>

Productivity = 33 mg in 12 h

$$\text{Productivity (per h)} := \frac{0.033}{12} = 0.00275 \text{ g/h}$$

$$\begin{aligned} \text{Space time yield} &:= \frac{\text{productivity}}{\text{volume of reactor}} \\ &= \frac{0.0028}{4} = 0.0007 \text{ g mL}^{-1} \text{ h}^{-1} \end{aligned}$$

**Table S5:** Comparative table for the carbene insertion into O-H bonds of carboxylic acid.

| Entry | Compound 2a                                                                         | Reagent 3a                                                                          | Product 4a                                                                           | Comparative result                                                                                                                  |
|-------|-------------------------------------------------------------------------------------|-------------------------------------------------------------------------------------|--------------------------------------------------------------------------------------|-------------------------------------------------------------------------------------------------------------------------------------|
| 1     | 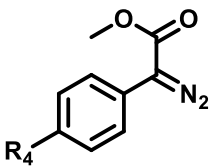 |  |  | 99.8%, 10 min. (our study)<br>Blue light, overnight, 91%<br>2<br>Guanidine (5 mol%), Rh(OAc) <sub>4</sub> (2.5 mol%), 3 h, 89%<br>3 |

**S3.5. General procedure for scope of substrate for carbene insertion into the O-H bonds of carboxylic acid for synthesis of compound 4b–4p.**

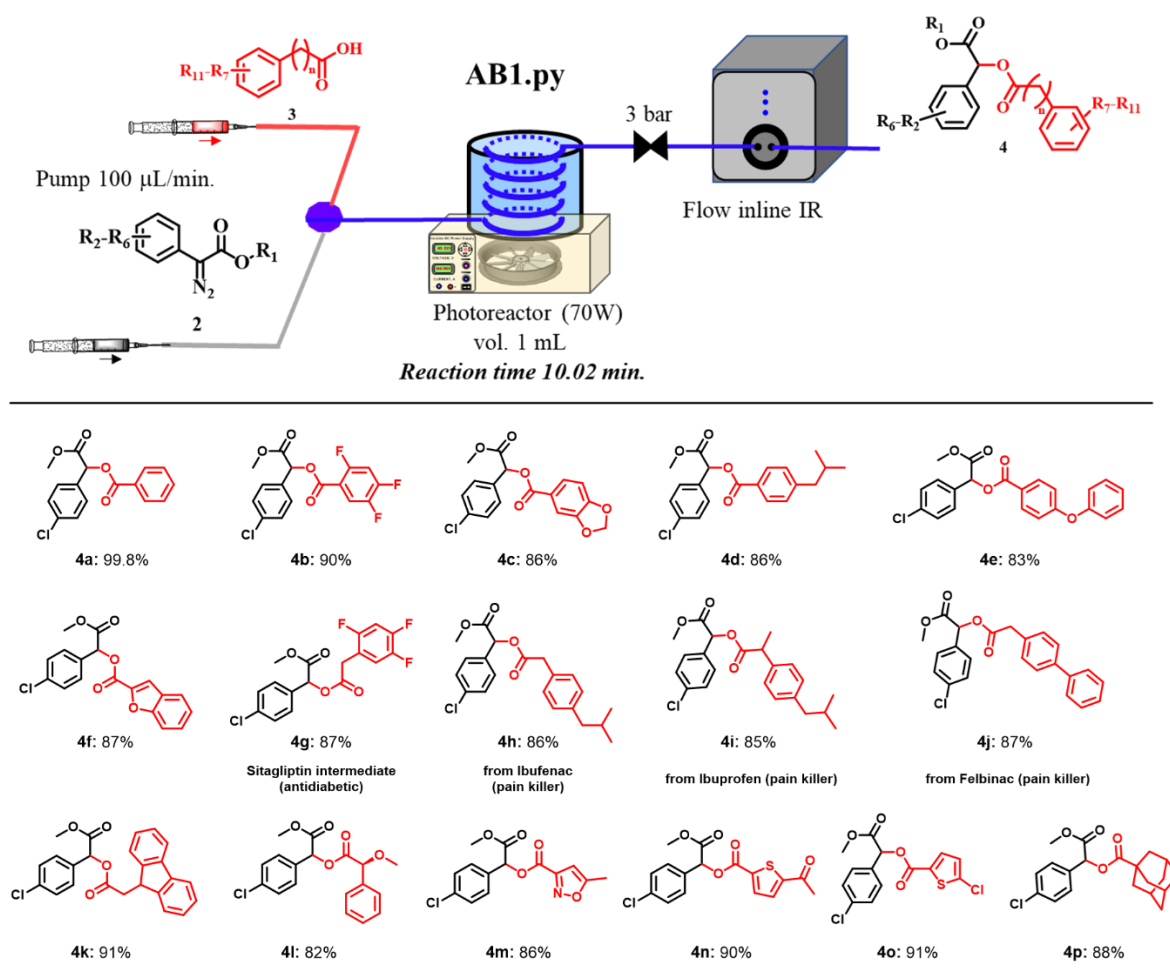

**Figure S19.** Scope of substrate for the photo activated O-H reaction. Compound **2** (0.1 M in EtOAc); reagent **3** (0.2 M in EtOAc); 1 mL reactor volume.

**Example 2.** 1-(4-chlorophenyl)-2-methoxy-2-oxoethyl 2,4,5-trifluorobenzoate (**4b**):

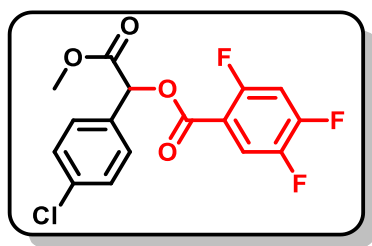

The title compound was synthesised following the general procedure described in section 3.3, and involve corresponding reactant exchange with compound **2a** and compound **3b** (2,4,5-trifluorobenzoic acid). The crude mixture was concentrated under vacuum and the product was purified by flash chromatography;  $R_f = 0.5$  (10% ethylacetate/hexane); to give compound **4b** (0.48 g in 5 h, 90%) as a colorless oil.  $^1\text{H NMR}$  (400 MHz,  $\text{CDCl}_3$ )  $\delta$  7.90 – 7.83 (m, 1H), 7.51 – 7.49 (m, 2H), 7.42 – 7.39 (m, 2H), 7.07 – 7.01 (m, 1H), 6.13 (s, 1H), 3.76 (s, 3H).  $^{13}\text{C NMR}$  (101 MHz,  $\text{CDCl}_3$ )  $\delta$  168.57, 161.79, 159.44, 157.34, 154.87, 152.81, 147.69, 145.64, 135.69, 131.89, 129.31, 129.04, 120.50, 120.33, 107.62, 107.46, 107.40, 107.23, 74.78, 53.10.  $^{19}\text{F NMR}$  (376 MHz,  $\text{CDCl}_3$ )  $\delta$  -107.92, -107.95, -107.96, -107.99, -123.52, -123.55, -123.59, -123.61, -140.79, -140.85, -140.90. **IR** ( $\nu_{\text{max}}$ ): 3021.92, 2925.33, 1746.25, 1623.42, 1518.64, 1216.49, 824.87  $\text{cm}^{-1}$ . **HRMS (ESI):**  $m/z$  calcd for  $\text{C}_{16}\text{H}_{11}\text{ClF}_3\text{O}_4$   $[\text{M}+\text{H}]^+$  359.0292, found 359.0298.

**Example 3.** 1-(4-chlorophenyl)-2-methoxy-2-oxoethyl benzo[d][1,3]dioxole-5-carboxylate (**4c**):

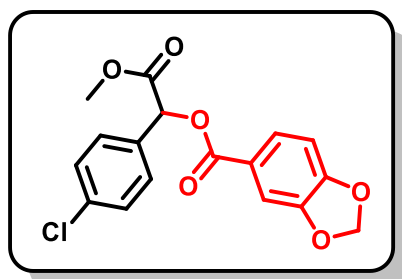

The title compound was synthesised following the general procedure described in section 3.3, and involve corresponding reactant exchange with compound **2a** and compound **3c**

(benzo[*d*][1,3]dioxole-5-carboxylic acid). The crude mixture was concentrated under vacuum and the product was purified by flash chromatography;  $R_f = 0.5$  (10% ethylacetate/hexane); to give compound **4c** (0.45 g in 5 h, 86%) as a colorless oil  $^1\text{H NMR}$  (400 MHz,  $\text{CDCl}_3$ )  $\delta$  7.74 – 7.72 (m, 1H), 7.52 – 7.49 (m, 3H), 7.41 – 7.39 (m, 2H), 6.85 (d,  $J = 8.2$  Hz, 1H), 6.10 (s, 1H), 6.05 (s, 2H), 3.75 (s, 3H).  $^{13}\text{C NMR}$  (101 MHz,  $\text{CDCl}_3$ )  $\delta$  169.13, 165.13, 152.34, 147.95, 135.44, 132.66, 131.09, 129.21, 129.08, 126.16, 123.01, 109.85, 108.24, 102.06, 74.15, 52.90.  $\text{IR}$  ( $\nu_{\text{max}}$ ): 2955.71, 2920.24, 1754.04, 1718.03, 1256.96, 1036.39, 831.60  $\text{cm}^{-1}$ .  $\text{HRMS}$  (ESI):  $m/z$  calcd for  $\text{C}_{17}\text{H}_{14}\text{ClO}_6$   $[\text{M}+\text{H}]^+$  349.0473, found 349.0475.

**Example 4. 1-(4-chlorophenyl)-2-methoxy-2-oxoethyl 4-isobutylbenzoate (4d):**

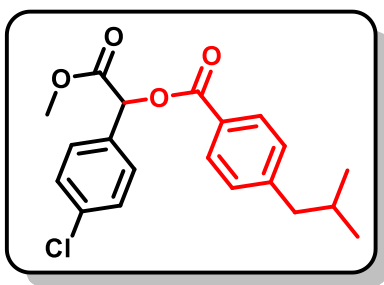

The title compound was synthesised following the general procedure described in section 3.3, and involve corresponding reactant exchange with compound **2a** and compound **3d** (4-isobutylbenzoic acid). The crude mixture was concentrated under vacuum and the product was purified by flash chromatography;  $R_f = 0.4$  (10% ethylacetate/hexane); to give compound **4d** (0.46 g in 5 h, 86%) as a colorless oil.  $^1\text{H NMR}$  (400 MHz,  $\text{CDCl}_3$ )  $\delta$  8.04 – 8.01 (m, 2H), 7.53 – 7.51 (m, 2H), 7.39 – 7.37 (m, 2H), 7.22 (d,  $J = 8.3$  Hz, 2H), 6.14 (s, 1H), 3.73 (s, 3H), 2.52 (d,  $J = 7.2$  Hz, 2H), 1.91 – 1.83 (m, 1H), 0.89 (d,  $J = 6.6$  Hz, 6H).  $^{13}\text{C NMR}$  (101 MHz,  $\text{CDCl}_3$ )  $\delta$  169.02, 165.73, 148.11, 135.25, 132.68, 129.90, 129.27, 129.07, 129.00, 126.57, 73.97, 52.71, 45.42, 30.12, 22.29.  $\text{IR}$  ( $\nu_{\text{max}}$ ): 3022.14, 2960.22, 1753.90, 1721.69, 1492.80, 1215.16, 1016.94  $\text{cm}^{-1}$ .  $\text{HRMS}$  (ESI):  $m/z$  calcd for  $\text{C}_{20}\text{H}_{22}\text{ClO}_4$   $[\text{M}+\text{H}]^+$  361.1201, found 361.1209.

**Example 5. 1-(4-chlorophenyl)-2-methoxy-2-oxoethyl 4-phenoxybenzoate (4e):**

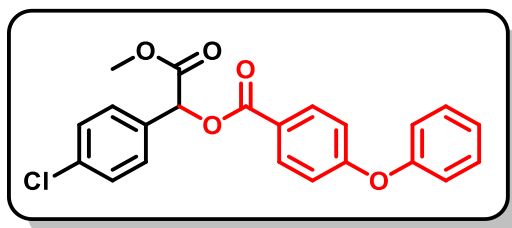

The title compound was synthesised following the general procedure described in section 3.3, and involve corresponding reactant exchange with compound **2a** and compound **3e** (4-phenoxybenzoic acid). The crude mixture was concentrated under vacuum and the product was purified by flash chromatography;  $R_f = 0.6$  (10% ethylacetate/hexane); to give compound **4e** (0.49 g in 5 h, 83%) as a colorless oil.  $^1\text{H NMR}$  (400 MHz,  $\text{CDCl}_3$ )  $\delta$  8.11 – 8.08 (m, 2H), 7.54 – 7.52 (m, 2H), 7.42 – 7.38 (m, 4H), 7.22 – 7.18 (m, 1H), 7.09 – 7.00 (m, 4H), 6.15 (s, 1H), 3.76 (s, 3H).  $^{13}\text{C NMR}$  (101 MHz,  $\text{CDCl}_3$ )  $\delta$  169.06, 165.19, 162.51, 155.48, 135.36, 132.65, 132.22, 130.13, 129.15, 129.03, 124.72, 123.25, 120.23, 117.40, 74.05, 52.83.  $\text{IR}$  ( $\nu_{\text{max}}$ ): 3022.03, 1754, 1720.35, 1491.57, 1215.73, 865.28  $\text{cm}^{-1}$ .  $\text{HRMS}$  (ESI):  $m/z$  calcd for  $\text{C}_{22}\text{H}_{18}\text{ClO}_5$   $[\text{M}+\text{H}]^+$  397.0837, found 397.0847.

**Example 6. 1-(4-chlorophenyl)-2-methoxy-2-oxoethyl benzofuran-2-carboxylate (4f):**

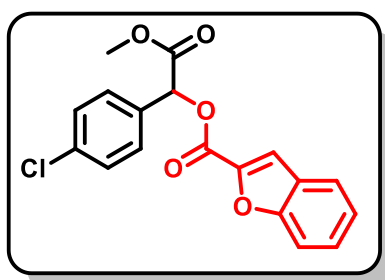

The title compound was synthesised following the general procedure described in section 3.3, and involve corresponding reactant exchange with compound **2a** and compound **3f** (benzofuran-2-carboxylic acid). The crude mixture was concentrated under vacuum and the product was purified by flash chromatography;  $R_f = 0.5$  (10% ethylacetate/hexane); to give compound **4f** (0.45 g in 5 h, 87%) as a colorless oil.  $^1\text{H NMR}$  (400 MHz,  $\text{CDCl}_3$ )  $\delta$  7.67 –

7.65 (m, 2H), 7.57 – 7.51 (m, 3H), 7.45 – 7.37 (m, 3H), 7.30 – 7.25 (m, 1H), 6.19 (s, 1H), 3.75 (s, 3H). **<sup>13</sup>C NMR (101 MHz, CDCl<sub>3</sub>)** δ 168.53, 158.52, 156.04, 144.36, 135.54, 132.01, 129.17, 129.11, 128.12, 126.81, 123.99, 123.02, 115.41, 74.21, 52.94. **IR (ν<sub>max</sub>):** 2956.04, 2854.56, 1730.43, 1566.86, 1172.31, 888.28 cm<sup>-1</sup>. **HRMS (ESI):** *m/z* calcd for C<sub>18</sub>H<sub>14</sub>ClO<sub>5</sub> [M+H]<sup>+</sup> 345.0524, found 345.0531.

**Example 7. Methyl 2-(4-chlorophenyl)-2-(2-(2,4,5-trifluorophenyl)acetoxy)acetate (4g):**

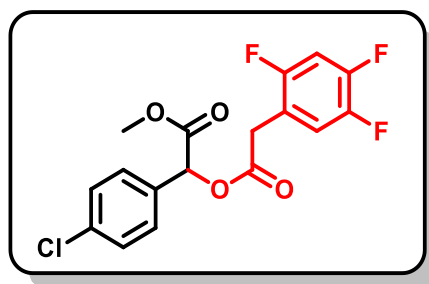

The title compound was synthesised following the general procedure described in section 3.3, and involve corresponding reactant exchange with compound **2a** and compound **3g** (2-(2,4,5-trifluorophenyl)acetic acid). The crude mixture was concentrated under vacuum and the product was purified by flash chromatography; **R<sub>f</sub>** = 0.4 (10% ethylacetate/hexane); to give compound **4g** (0.48 g in 5 h, 87%) as a colorless oil. **<sup>1</sup>H NMR (400 MHz, CDCl<sub>3</sub>)** δ 7.39 – 7.34 (m, 4H), 7.22 – 7.15 (m, 1H), 6.97 – 6.90 (m, 1H), 5.94 (s, 1H), 3.77 (d, *J* = 3.8 Hz, 2H), 3.71 (s, 3H). **<sup>13</sup>C NMR (101 MHz, CDCl<sub>3</sub>)** δ 169.27, 168.63, 157.40, 157.32, 154.95, 154.88, 150.95, 150.82, 150.69, 148.46, 148.32, 148.20, 148.00, 147.87, 145.60, 145.57, 145.47, 145.44, 135.54, 131.94, 129.17, 128.99, 119.33, 119.28, 119.13, 119.09, 117.10, 117.05, 117.00, 116.92, 116.87, 116.82, 105.83, 105.62, 105.55, 105.34, 74.36, 52.89, 33.32. **<sup>19</sup>F NMR (471 MHz, CDCl<sub>3</sub>)** δ -118.27, -118.30, -134.23, -134.27, -142.50, -142.54, -142.57. **IR (ν<sub>max</sub>):** 3024.90, 2958.73, 1749.06, 1633.89, 1215.42, 979.95, 850.85. **HRMS (ESI):** *m/z* calcd for C<sub>17</sub>H<sub>13</sub>ClF<sub>3</sub>O<sub>4</sub> [M+H]<sup>+</sup> 373.0449, found 373.0456.

**Example 8. Methyl 2-(4-chlorophenyl)-2-(2-(4-isobutylphenyl)acetoxy)acetate (4h):**

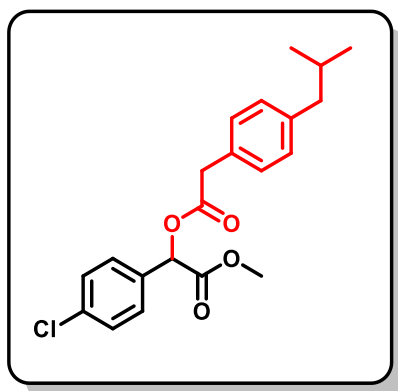

The title compound was synthesised following the general procedure described in section 3.3, and involve corresponding reactant exchange with compound **2a** and compound **3h** (2-(4-isobutylphenyl)acetic acid). The crude mixture was concentrated under vacuum and the product was purified by flash chromatography;  $R_f = 0.4$  (10% ethylacetate/hexane); to give compound **4h** (0.49 g in 5 h, 88%) as a colorless oil.  $^1\text{H NMR}$  (400 MHz,  $\text{CDCl}_3$ )  $\delta$  7.37 – 7.32 (m, 4H), 7.20 (d,  $J = 8.1$  Hz, 2H), 7.10 (d,  $J = 8.1$  Hz, 2H), 5.91 (s, 1H), 3.74 (d,  $J = 3.8$  Hz, 2H), 3.69 (s, 3H), 2.45 (d,  $J = 7.2$  Hz, 2H), 1.89 – 1.79 (m, 1H), 0.89 (d,  $J = 6.6$  Hz, 6H).  $^{13}\text{C NMR}$  (101 MHz,  $\text{CDCl}_3$ )  $\delta$  171.00, 168.85, 140.75, 135.27, 132.28, 130.43, 73.92, 52.76, 45.09, 40.47, 30.23, 22.39. IR ( $\nu_{\text{max}}$ ): 3020.64, 2957.88, 1748.49, 1492.75, 1215.51, 1016.03  $\text{cm}^{-1}$ . HRMS (ESI):  $m/z$  calcd for  $\text{C}_{21}\text{H}_{24}\text{ClO}_4$   $[\text{M}+\text{H}]^+$  375.8685, found 375.8690.

**Example 9. 1-(4-chlorophenyl)-2-methoxy-2-oxoethyl 2-(4-isobutylphenyl)propanoate (4i):**

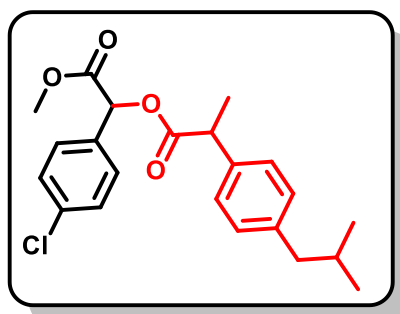

The title compound was synthesised following the general procedure described in section 3.3, and involve corresponding reactant exchange with compound **2a** and compound **3i** (2-(4-isobutylphenyl)propanoic acid). The crude mixture was concentrated under vacuum and the



product was purified by flash chromatography;  $R_f = 0.5$  (10% ethylacetate/hexane); to give compound **4i** (0.49 g in 5 h, 85%) as a colorless oil.  $^1\text{H NMR}$  (400 MHz,  $\text{CDCl}_3$ )  $\delta$  7.31 (d,  $J = 1.5$  Hz, 2H), 7.27 – 7.19 (m, 4H), 7.13 – 7.06 (m, 2H), 5.89 (d,  $J = 3.3$  Hz, 1H), 3.90 – 3.83 (m, 1H), 3.65 (d,  $J = 31.5$  Hz, 3H), 2.44 (dd,  $J = 10.1, 7.2$  Hz, 2H), 1.89 – 1.79 (m, 1H), 1.56 (dd,  $J = 7.2, 2.0$  Hz, 3H), 0.89 (t,  $J = 6.8$  Hz, 6H).  $^{13}\text{C NMR}$  (101 MHz,  $\text{CDCl}_3$ )  $\delta$  173.89, 173.82, 168.94, 168.74, 140.78, 140.71, 137.02, 136.92, 135.18, 135.08, 132.44, 132.39, 129.40, 129.33, 128.98, 128.91, 128.82, 128.71, 127.46, 127.37, 73.90, 73.71, 52.72, 52.59, 45.10, 45.06, 44.96, 44.82, 30.24, 22.41, 18.49, 18.35. IR ( $\nu_{\text{max}}$ ): 3020.99, 2956.85, 2872.11, 1744.81, 1599.53, 1215.33, 1016.16  $\text{cm}^{-1}$ . HRMS (ESI):  $m/z$  calcd for  $\text{C}_{22}\text{H}_{26}\text{ClO}_4$   $[\text{M}+\text{H}]^+$  389.1514, found 389.1520.

**Example 10. Methyl 2-(2-([1,1'-biphenyl]-4-yl)acetoxy)-2-(4-chlorophenyl)acetate (4j):**

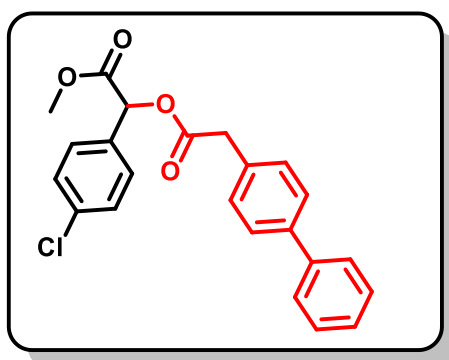

The title compound was synthesised following the general procedure described in section 3.3, and involve corresponding reactant exchange with compound **2a** and compound **3j** (2-([1,1'-biphenyl]-4-yl)acetic acid). The crude mixture was concentrated under vacuum and the product was purified by flash chromatography;  $R_f = 0.5$  (10% ethylacetate/hexane); to give compound **4j** (0.52 g in 5 h, 87%) as a colorless oil.  $^1\text{H NMR}$  (400 MHz,  $\text{CDCl}_3$ )  $\delta$  7.58 – 7.55 (m, 4H), 7.45 – 7.32 (m, 9H), 5.94 (s, 1H), 3.87 – 3.77 (m, 2H), 3.70 (s, 3H).  $^{13}\text{C NMR}$  (101 MHz,  $\text{CDCl}_3$ )  $\delta$  170.82, 168.84, 140.74, 140.29, 135.36, 132.22, 132.18, 129.83, 129.07, 128.94, 128.81, 127.38, 127.09, 74.04, 52.80, 40.45. IR ( $\nu_{\text{max}}$ ): 3024.43, 1744.86, 1489.15, 1215.88, 1013.88  $\text{cm}^{-1}$ . HRMS (ESI):  $m/z$  calcd for  $\text{C}_{23}\text{H}_{20}\text{ClO}_4$   $[\text{M}+\text{H}]^+$  395.1045, found 395.1055.

**Example 11. Methyl 2-(2-(9H-fluoren-9-yl)acetoxy)-2-(4-chlorophenyl)acetate (4k):**

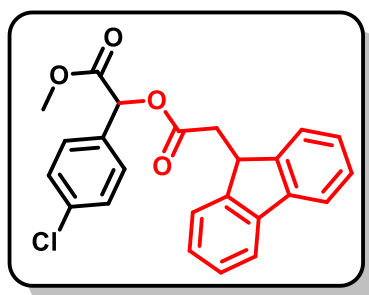

The title compound was synthesised following the general procedure described in section 3.3, and involve corresponding reactant exchange with compound **2a** and compound **3k** (2-(9H-fluoren-9-yl)acetic acid). The crude mixture was concentrated under vacuum and the product was purified by flash chromatography;  $R_f = 0.45$  (10% ethylacetate/hexane); to give compound **4k** (0.55 g in 5 h, 91%) as a colorless oil.  $^1\text{H NMR}$  (400 MHz,  $\text{CDCl}_3$ )  $\delta$  7.71 (d,  $J = 7.5$  Hz, 2H), 7.50 (dd,  $J = 10.7, 7.6$  Hz, 2H), 7.43 – 7.29 (m, 8H), 6.04 (s, 1H), 4.49 (t,  $J = 6.9$  Hz, 1H), 3.78 (s, 3H), 3.01 (dd,  $J = 16.5, 6.8$  Hz, 1H), 2.90 (dd,  $J = 16.5, 7.1$  Hz, 1H).  $^{13}\text{C NMR}$  (101 MHz,  $\text{CDCl}_3$ )  $\delta$  171.66, 168.85, 145.93, 140.86, 140.81, 135.32, 132.15, 129.05, 129.01, 127.59, 127.30, 127.25, 124.46, 120.00, 74.07, 52.83, 43.37, 38.15. IR ( $\nu_{\text{max}}$ ): 3019.04, 2922.32, 1741.47, 1489.45, 1216.03, 1144.72  $\text{cm}^{-1}$ . HRMS (ESI):  $m/z$  calcd for  $\text{C}_{24}\text{H}_{20}\text{ClO}_4$   $[\text{M}+\text{H}]^+$  407.1045, found 407.1053.

**Example 12. 1-(4-Chlorophenyl)-2-methoxy-2-oxoethyl (2S)-2-methoxy-2-phenylacetate (4l):**

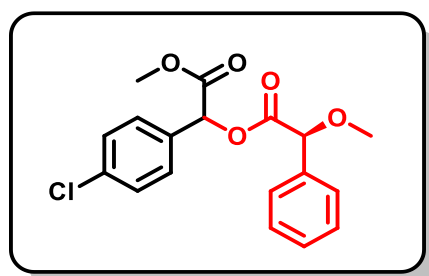

The title compound was synthesised following the general procedure described in section 3.3, and involve corresponding reactant exchange with compound **2a** and compound **3l** ((R)-3-

methoxy-3-phenylpropanoic acid). The crude mixture was concentrated under vacuum and the product was purified by flash chromatography;  $R_f = 0.6$  (10% ethylacetate/hexane); to give compound **4l** (0.44 g in 5 h, 82%) as a colorless oil.  $^1\text{H NMR}$  (400 MHz,  $\text{CDCl}_3$ )  $\delta$  7.50 – 7.48 (m, 2H), 7.41 – 7.33 (m, 7H), 5.93 (s, 1H), 4.90 (s, 1H), 3.59 (s, 3H), 3.49 (s, 3H).  $^{13}\text{C NMR}$  (101 MHz,  $\text{CDCl}_3$ )  $\delta$  170.10, 168.34, 135.70, 135.47, 132.02, 129.14, 129.00, 128.96, 128.69, 127.46, 82.49, 74.15, 57.71, 52.76.  $\text{IR}$  ( $\nu_{\text{max}}$ ): 2929.68, 1750.89, 1598.38, 1217.54, 1164.43, 1016.87, 828.38  $\text{cm}^{-1}$ .  $\text{HRMS}$  (ESI):  $m/z$  calcd for  $\text{C}_{22}\text{H}_{18}\text{ClO}_5$   $[\text{M}+\text{H}]^+$  363.0994, found 363.0999.

**Example 13. 1-(4-chlorophenyl)-2-methoxy-2-oxoethyl 5-methylisoxazole-3-carboxylate (4m):**

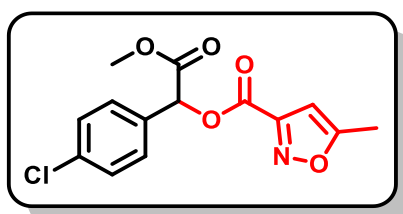

The title compound was synthesised following the general procedure described in section 3.3, and involve corresponding reactant exchange with compound **2a** and compound **3m** (5-methylisoxazole-3-carboxylic acid). The crude mixture was concentrated under vacuum and the product was purified by flash chromatography;  $R_f = 0.6$  (10% ethylacetate/hexane); to give compound **4m** (0.38 g in 5 h, 82%) as a colorless oil.  $^1\text{H NMR}$  (400 MHz,  $\text{CDCl}_3$ )  $\delta$  7.87 – 7.83 (m, 2H), 7.77 – 7.68 (m, 2H), 6.83 (d,  $J = 0.8$  Hz, 1H), 6.50 (s, 1H), 4.12 (s, 3H), 2.86 (d,  $J = 0.7$  Hz, 3H).  $^{13}\text{C NMR}$  (101 MHz,  $\text{CDCl}_3$ )  $\delta$  171.80, 168.21, 159.34, 155.55, 135.69, 131.62, 129.25, 129.15, 128.83, 128.04, 111.21, 102.55, 74.70, 72.26, 53.07, 12.40.  $\text{IR}$  ( $\nu_{\text{max}}$ ): 3021.10, 2957.90, 1746.23, 1598.19, 1207.20, 1006.59, 808.66  $\text{cm}^{-1}$ .  $\text{HRMS}$  (ESI):  $m/z$  calcd for  $\text{C}_{14}\text{H}_{13}\text{ClNO}_5$   $[\text{M}+\text{H}]^+$  310.0477, found 310.0478.

**Example 14. 1-(4-chlorophenyl)-2-methoxy-2-oxoethyl 5-acetylthiophene-2-carboxylate (4n):**

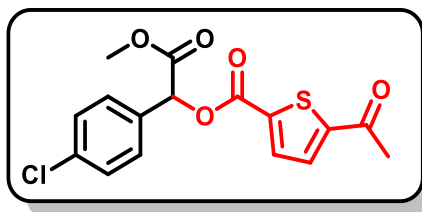

The title compound was synthesised following the general procedure described in section 3.3, and involve corresponding reactant exchange with compound **2a** and compound **3n** (5-acetylthiophene-2-carboxylic acid). The crude mixture was concentrated under vacuum and the product was purified by flash chromatography;  $R_f = 0.6$  (10% ethylacetate/hexane); to give compound **4n** (0.47 g in 5 h, 90%) as a colorless oil.  $^1\text{H NMR}$  (400 MHz,  $\text{CDCl}_3$ )  $\delta$  7.84 (d,  $J = 4.0$  Hz, 1H), 7.64 (d,  $J = 4.0$  Hz, 1H), 7.49 – 7.46 (m, 2H), 7.40 – 7.37 (m, 2H), 6.09 (s, 1H), 3.74 (s, 3H), 2.58 (s, 3H).  $^{13}\text{C NMR}$  (101 MHz,  $\text{CDCl}_3$ )  $\delta$  190.79, 168.43, 160.69, 149.64, 138.16, 135.61, 134.49, 131.85, 131.76, 129.22, 128.99, 74.54, 53.00, 27.07. IR ( $\nu_{\text{max}}$ ): 3021.89, 1724.77, 1673.48, 1524.47, 1214.90, 1017.28  $\text{cm}^{-1}$ . HRMS (ESI):  $m/z$  calcd for  $\text{C}_{16}\text{H}_{14}\text{ClO}_5\text{S}$   $[\text{M}+\text{H}]^+$  353.0245, found 353.0250.

**Example 15.** 1-(4-chlorophenyl)-2-methoxy-2-oxoethyl 5-chlorothiophene-2-carboxylate (**4o**):

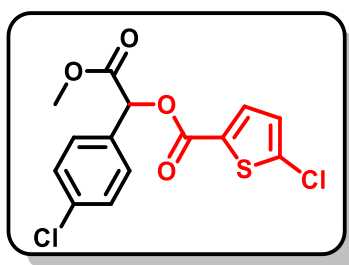

The title compound was synthesised following the general procedure described in section 3.3, and involve corresponding reactant exchange with compound **2a** and compound **3o** (5-chlorothiophene-2-carboxylic acid). The crude mixture was concentrated under vacuum and the product was purified by flash chromatography;  $R_f = 0.5$  (10% ethylacetate/hexane); to give compound **4o** (0.47 g in 5 h, 91%) as a colorless oil.  $^1\text{H NMR}$  (400 MHz,  $\text{CDCl}_3$ )  $\delta$  7.68 (d,  $J$

= 4.1 Hz, 1H), 7.48 – 7.46 (m, 2H), 7.40 – 7.37 (m, 2H), 6.95 (d,  $J = 5.0$  Hz, 1H), 6.08 (s, 1H), 3.74 (s, 3H).  **$^{13}\text{C}$  NMR (126 MHz,  $\text{CDCl}_3$ )**  $\delta$  168.53, 160.11, 138.53, 135.47, 134.15, 132.03, 130.39, 129.13, 128.95, 127.54, 74.20, 52.87. **IR ( $\nu_{\text{max}}$ ):** 3022.57, 1755.23, 1717.81, 1422.40, 1215.11, 1089.70  $\text{cm}^{-1}$ . **HRMS (ESI):**  $m/z$  calcd for  $\text{C}_{14}\text{H}_{11}\text{Cl}_2\text{O}_4\text{S}$   $[\text{M}+\text{H}]^+$  344.9750, found 344.9756.

**Example 16.** 1-(4-chlorophenyl)-2-methoxy-2-oxoethyl (1s,3s)-adamantane-1-carboxylate (**4p**):

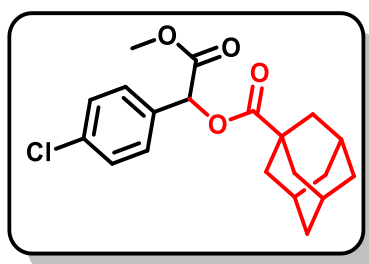

The title compound was synthesised following the general procedure described in section 3.3, and involve corresponding reactant exchange with compound **2a** and compound **3p** (adamantyl acid). The crude mixture was concentrated under vacuum and the product was purified by flash chromatography;  $R_f = 0.5$  (10% ethylacetate/hexane); to give compound **4p** (0.48 g in 5 h, 88%) as viscous oil.  **$^1\text{H}$  NMR (400 MHz,  $\text{CDCl}_3$ )**  $\delta$  7.42 – 7.40 (m, 2H), 7.35 – 7.32 (m, 2H), 5.88 (s, 1H), 3.68 (s, 3H), 2.02 (s, 3H), 1.97 (s, 6H), 1.71 (s, 6H).  **$^{13}\text{C}$  NMR (101 MHz,  $\text{CDCl}_3$ )**  $\delta$  176.70, 169.12, 135.10, 132.72, 129.00, 128.80, 73.24, 52.65, 40.75, 38.69, 36.46, 27.90. **IR ( $\nu_{\text{max}}$ ):** 2907.80, 2853.75, 1754.93, 1730.89, 1215.77, 1072.97  $\text{cm}^{-1}$ . **HRMS (ESI):**  $m/z$  calcd for  $\text{C}_{20}\text{H}_{24}\text{ClO}_4$   $[\text{M}+\text{H}]^+$  363.1358, found 363.1364.

**S4. Case study-2:** Carbene insertion (C-S bond formation) single objective multi-variant auto-optimization.

#### S4.1 Background collection

**Sample Preparation:** We prepared 0.5 M stock solutions of compound **2a**, reagent **5a**, and product **6a** in ethyl acetate, each loaded into separate syringes. For our analysis, we utilized an In-line FTIR system. The experimental protocol commenced with the initial introduction of ethyl acetate solvent for 10 minutes using a syringe pump, during which data was recorded. Subsequently, the stock solution of compound **2a** was introduced into the In-line FTIR for another 10 minutes. This procedure was repeated for the reaction product **6a** and reagent **5a**, with each pumped for 10 minutes. After collecting all relevant data, we identified the signature peak present in the product. Using this peak as a reference, we employed a Bayesian optimizer to fine-tune and optimize the reaction conditions for enhanced outcomes.

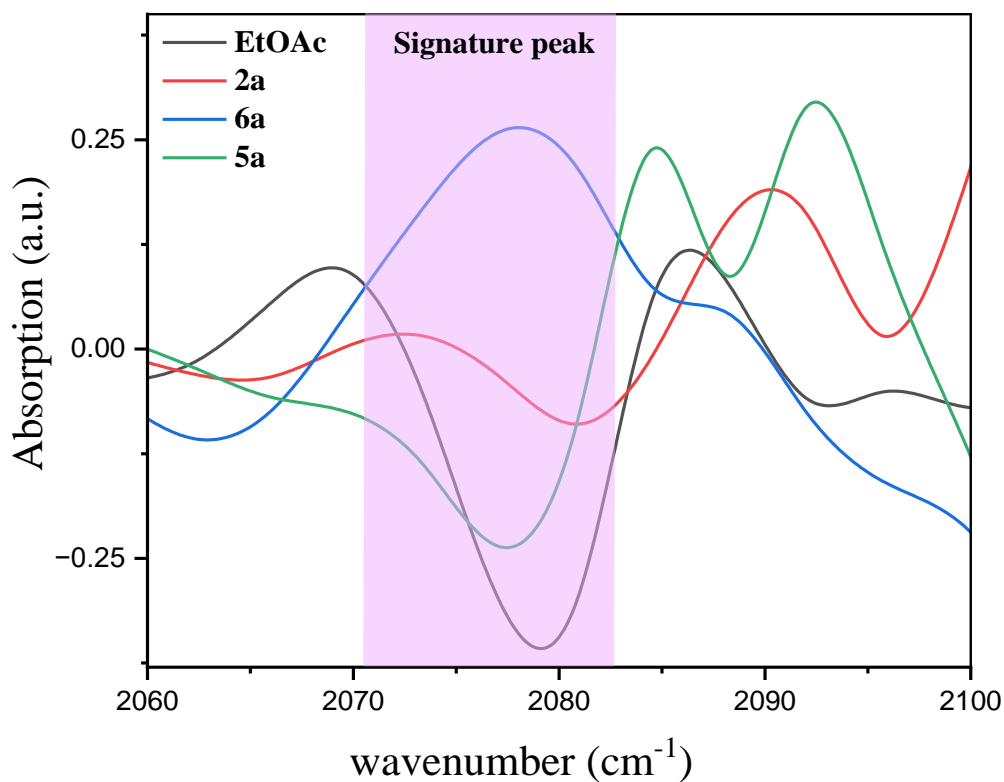

**Figure S20.** In-line IR background analysis of EtOAc, 0.5 M stock solution of **2a**, **5a**, and **6a** in EtOAc.

The distinctive shifting peak associated with product (**6a**) aligning within the range of 2070 to 2085  $\text{cm}^{-1}$  was observed. This specific peak, falling within this range, is designated as the signature peak for our analysis. During the optimization of the reaction through Bayesian methods, this signature peak serves as a pivotal reference point. We utilize it to calculate the area under the curve in the In-line FT-IR spectra, providing a quantitative measure of the area in the forthcoming reaction mixture.

#### **S4.2. General procedure for the auto-optimized synthesis of compound 6a.**

In our approach we are employing a Python-coded based Bayesian optimization strategy for further refinement. Initial steps involved the preparation of stock solutions for compound **2a** (0.1 M in EtOAc) and reagent **5a** (0.2 M in EtOAc), each filled into separate syringes and connected to a syringe pump. The solutions were then directed through a PFA tubular reactor (inner diameter = 1 mm, length = 1.3 m, volume = 1 mL) surrounded by a cylindrical-shaped blue LED light source. Once the solution setup was complete, input ranges for variable flow rates, voltages, and current were specified in the Python code designed for the reaction. The Bayesian optimizer systematically explored these varying reaction conditions, aiming to achieve maximum yield. The optimization process involved running 70-80 experiments and the results were tabulated in the optimization table (Table S6).

### S4.2.1. Python code for optimizing condition of carbene insertion reaction (C-S bond formation).

```
ab2.py
1 from os import listdir
2 from os.path import isfile, join
3 import serial
4
5 import numpy as np
6 import pandas as pd
7 import time
8 from scipy.integrate import trapz
9
10 #step1: be sure to the address of the files that the ftir data is exported is matching to line 11 (mypath)
11 mypath = "C:\\Users\\Admin\\Desktop\\ruchi\\Exp 2023-10-09 10-24"
12 onlyfiles = [f for f in listdir(mypath) if isfile(join(mypath, f))]
13
14
15 #step2: make sure that pump and the potentiostat is correctly addressed in the line 16 and 17
16 pump_1 = serial.Serial("COM4",9600) #Harvard Pump
17 port = serial.Serial("COM1",115200)
18 printer = serial.Serial("COM11", 115200, timeout=1)
19
20
21
22 #step 3: grab the lines from 22 to 90 and press f9
23 def area_under(data,start,end):
24     x = np.flip(data.iloc[start:end,0].to_numpy())
25     y = np.flip(data.iloc[start:end,1].to_numpy())
26     area = trapz(y,x)
27     return np.abs(area)
28
29 def file_namer(num):
30     str1 = str(num)
31     length = int(len((str1)))
32     empt = ''
33     for i in range(5-length):
34         empt = empt+'0'
35
36     return empt+str1
37
38
39 def ftir_extract(filename,init,end):
40
41     filename = filename
42
43     temp_df = pd.read_csv(filename)
44     # nump_df = temp_df.to_numpy()
45     area = area_under(temp_df, init, end)
46     # max_peak = np.max(nump_df[90:120,1])
47     print(area)
```



```

48
49     return area
50
51
52 def function(flowrate_1,v,i):
53
54     #set the pumps with the flowrate as the desired flowrate for the function
55
56     fr_1 = flowrate_1 #ml/min
57     pump_1.write(('irate '+str(fr_1)+' ml/min\r\n').encode())
58
59     time.sleep(0.1)
60
61     #set the com port for potentiostat and set the voltage and current
62     vol = v
63     curr = i
64     port.write(('VOLT '+str(vol)+'\r\n').encode()) #to change the voltge we need to use "VOLT 1" command
65     port.write(('CURR '+str(curr)+'\r\n').encode()) #to change the current we need to use "CURR 1" command
66
67
68     #pumps run
69     pump_1.write(('irun\r\n'))
70     time.sleep(0.1)
71     time.sleep(2400)
72
73 def function2(flowrate_1,v,i):
74     time.sleep(180)
75
76     files = [f for f in listdir(mypath) if isfile(join(mypath, f))]
77
78     val = 0
79
80     #change wavelengths as per product here.
81     f_row=17 #first row of range for wavelength as per IR CSV
82     l_row=23 #last row of range for wavelength as per IR CSV
83
84     val += ftir_extract(files[-1],f_row,l_row)
85     val+=ftir_extract(files[-2],f_row,l_row)
86     val+=ftir_extract(files[-3],f_row,l_row)
87
88     avg_val = val/3
89
90     return avg_val
91
92
93 #step 4:grab the line 93 and f9
94 from skopt.optimizer import Optimizer

```

```

95
96
97 #step5:in line 96 we have to define the range that (flowrate,voltage,current) (from,to) and after (anytime) applying changes you need to grab the line 96 and f9
98 #flowrates are in ml/min, voltage in V, Current in Ampere
99 bounds = [(0.05,0.2),(10,14.5),(4.9,5.0)]
100
101
102 #step 6: grab the line 100 and f9
103 opter =Optimizer(bounds,base_estimator='gp',n_initial_points=3,acq_func="EI",random_state=np.random.randint(3326))
104
105
106 #step7: to selecte number of the cycles that you have to do the experiment and then grab the line 104 to 121 and f9: the closed loop experimentation is initiated
107 number_of_cycles = 22
108 results = []
109 flowrates_1 = []
110 vs = []
111 currents = []
112
113 product_wavelength=True #set to true if product wavelengths being monitored
114
115 if product_wavelength == True:
116     val=1
117 else:
118     val=-1
119
120
121 # Step 8: Test Tubes on Printer
122 USE_PRINTER = True
123 REST_HEIGHT = 200
124 X_HOME = -5
125 Y_HOME = 20
126 Z_HOME = 175
127 DEFAULT_PUMP_TIME="1"
128 # Distance between test tubes
129 X_SPACING=20
130 Y_SPACING=20
131 # Number of test tubes
132 X_ROWS = 11
133 Y_COLUMNS = 4
134
135 def send_cmd(cmd):
136     print(cmd)
137     printer.write(f"{cmd}\n".encode("ASCII"))
138
139 def move(x=None, y=None, z=None):

```

```

140     s = "G0"
141     if x is not None:
142         s += f"X{x}"
143     if y is not None:
144         s += f"Y{y}"
145     if z is not None:
146         s += f"Z{z}"
147
148     s+= "F5000"
149     send_cmd(s)
150
151 def printer_positions():
152     for j in range(Y_COLUMNS):
153         for i in range(X_ROWS):
154             if j%2==1:
155                 yield (X_HOME + (X_ROWS - 1 - i) * X_SPACING, Y_HOME + j * Y_SPACING, Z_HOME)
156             else:
157                 yield (X_HOME + i * X_SPACING, Y_HOME + j * Y_SPACING, Z_HOME)
158
159 # Run this.
160 tube_location = list(printer_positions())
161
162
163 for i in range(number_of_cycles):
164     move(*tube_location[2*i])
165     asked = opter.ask()
166     function(asked[0],asked[1],asked[2])
167     move(*tube_location[2*i+1])
168     told = function2(asked[0],asked[1],asked[2])
169
170     print(f"area under the curve in the round {i:.2f} = {told: .2f}")
171     opter.tell(asked,-told*val)
172     results.append(told)
173     flowrates_1.append(asked[0])
174     vs.append(asked[1])
175     currents.append(asked[2])
176
177     dict1 = {"flowrate_1":flowrates_1,"voltages":vs, "currents":currents,"area-results":results}
178     df2 = pd.DataFrame(dict1)
179     df2.to_csv("output round "+str(i)+".csv")
180
181
182
183 pump_1.write(b'stop\r\n')
184
185
186

```

**Table S6.** Auto-optimization table of carbene insertion reaction into S-H bonds of thiophenol.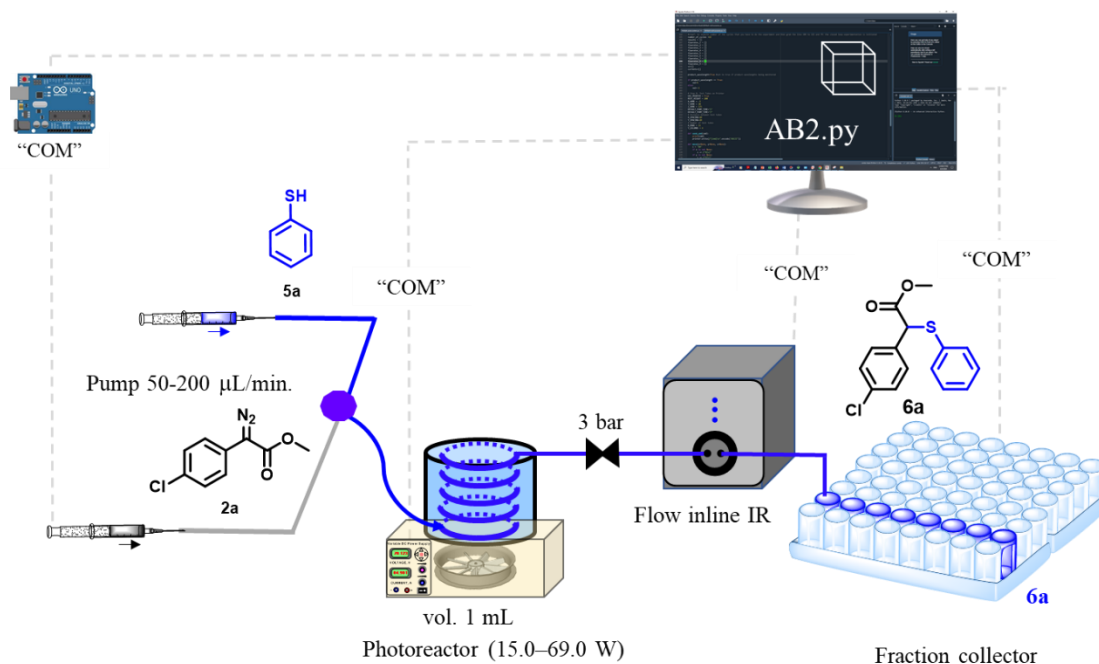

| No. of experiments | Flow rate mL/min | Voltage (V) | Light intensity (W) | area-results | Yield (%)  | Spacetime yield (g mL <sup>-1</sup> h <sup>-1</sup> ) |
|--------------------|------------------|-------------|---------------------|--------------|------------|-------------------------------------------------------|
| 1                  | 0.12187          | 14.0141     | 61.3                | 0.639877     | 62.1628401 | 0.066363879                                           |
| 2                  | 0.15077          | 14.1614     | 63.583              | 0.725702     | 70.500557  | 0.093113272                                           |
| 3                  | 0.14389          | 14.3314     | 65.894              | 0.771888     | 74.987459  | 0.094519922                                           |
| 4                  | 0.17094          | 14.5        | 65.85               | 0.94132      | 91.4474572 | 0.136936568                                           |
| 5                  | 0.1              | 12.3572     | 39.777              | 0.536517     | 52.1216116 | 0.045658532                                           |
| 6                  | 0.16593          | 14.0518     | 62.246              | 0.886884     | 86.1591028 | 0.125236288                                           |
| 7                  | 0.2              | 14.5        | 68.778              | 0.790801     | 76.8248211 | 0.134597087                                           |
| 8                  | 0.1894           | 14.5        | 68.778              | 0.910954     | 88.4974578 | 0.146830026                                           |
| 9                  | 0.17392          | 14.5        | 68.778              | 0.978956     | 95.1037234 | 0.144894251                                           |
| 10                 | 0.2              | 14          | 60.96               | 0.672707     | 65.3522124 | 0.114497076                                           |
| 11                 | 0.175            | 14.5        | 68.3                | 0.97634      | 94.849584  | 0.145404412                                           |
| 12                 | 0.14684          | 14.5        | 68.213              | 0.909719     | 88.3774799 | 0.113681579                                           |
| 13                 | 0.16295          | 14.5        | 68.169              | 0.953319     | 92.6131374 | 0.132199882                                           |
| 14                 | 0.2              | 14          | 61.002              | 0.758361     | 73.6733365 | 0.129075686                                           |
| 15                 | 0.15126          | 14.5        | 68.368              | 0.919708     | 89.3478923 | 0.118389317                                           |

|           |                |                |               |                 |                   |                    |
|-----------|----------------|----------------|---------------|-----------------|-------------------|--------------------|
| 16        | 0.13402        | 14.2839        | 66.944        | 0.797798        | 77.5045665        | 0.090991539        |
| 17        | 0.15638        | 14.0233        | 61.295        | 0.669423        | 65.0331781        | 0.089088222        |
| 18        | 0.12526        | 14.0342        | 61.455        | 0.745254        | 72.4000163        | 0.079442916        |
| 19        | 0.1            | 14.5           | 68.281        | 0.900546        | 87.4863403        | 0.076638034        |
| 20        | 0.11313        | 14.0352        | 61.319        | 0.61147         | 59.4031537        | 0.058869642        |
| 21        | 0.1            | 11.0324        | 25.032        | 0.206977        | 20.107424         | 0.017614103        |
| 22        | 0.16846        | 14.0379        | 61.305        | 0.851698        | 82.7408495        | 0.122101466        |
| 23        | 0.18174        | 12.3572        | 39.777        | 0.205725        | 19.9857946        | 0.031818232        |
| 24        | 0.18955        | 11.7409        | 32.482        | 0.466023        | 45.2732528        | 0.075174335        |
| 25        | 0.13922        | 14.1921        | 63.566        | 0.75473         | 73.3205917        | 0.089419389        |
| 26        | 0.14375        | 14.5           | 67.904        | 0.870399        | 84.5576163        | 0.106479178        |
| 27        | 0.18405        | 10.0002        | 15.42         | 0.103039        | 10.0100439        | 0.016138974        |
| 28        | 0.2            | 14             | 60.844        | 0.794354        | 77.1699884        | 0.13520182         |
| 29        | 0.18552        | 14.3822        | 66.263        | 0.894818        | 86.9298759        | 0.14127454         |
| 30        | 0.10265        | 14.104         | 62.297        | 0.769329        | 74.738857         | 0.067206227        |
| 31        | 0.16804        | 14.4279        | 66.956        | 0.89149         | 86.606567         | 0.127487499        |
| 32        | 0.17293        | 14.5           | 68.961        | 0.977279        | 94.9408061        | 0.143822675        |
| 33        | 0.1            | 14.4738        | 67.545        | 0.691974        | 67.2239651        | 0.058888193        |
| 34        | 0.12095        | 14.0335        | 61.184        | 0.622655        | 60.4897553        | 0.064090227        |
| 35        | 0.12869        | 14.3928        | 66.309        | 0.896598        | 87.1027996        | 0.098193111        |
| 36        | 0.1            | 13.466         | 54.12         | 0.584978        | 56.8295061        | 0.049782647        |
| 37        | 0.1653         | 14.5           | 67.41         | 0.931312        | 90.475199         | 0.131010621        |
| 38        | 0.1583         | 14.0035        | 60.003        | 0.89358         | 86.8096066        | 0.120379576        |
| 39        | 0.17399        | 14.0821        | 61.355        | 0.855364        | 83.0969945        | 0.126652484        |
| 40        | 0.1736         | 14.0805        | 61.186        | 0.830028        | 80.63565          | 0.122625536        |
| 41        | 0.19014        | 14.052         | 60.143        | 0.717789        | 69.7318435        | 0.116147199        |
| <b>42</b> | <b>0.17339</b> | <b>14.4756</b> | <b>68.784</b> | <b>1.008769</b> | <b>97.9786321</b> | <b>0.148819392</b> |
| 43        | 0.10246        | 14.0741        | 61.785        | 0.789538        | 76.6853989        | 0.068828949        |
| 44        | 0.1083         | 13.3572        | 52.066        | 0.597804        | 58.0628649        | 0.055084704        |
| 45        | 0.15031        | 13.3544        | 52            | 0.649264        | 63.0610165        | 0.083033424        |
| 46        | 0.16092        | 14.4505        | 67.288        | 0.928714        | 90.203136         | 0.127155681        |
| 47        | 0.18975        | 11.1796        | 26.503        | 0.190577        | 18.5101582        | 0.03076777         |
| 48        | 0.1005         | 10             | 15.48         | 0.061864        | 6.00866015        | 0.005289904        |

|    |         |         |        |          |            |             |
|----|---------|---------|--------|----------|------------|-------------|
| 49 | 0.18795 | 11.6288 | 30.954 | 0.394747 | 38.3405627 | 0.063125513 |
| 50 | 0.16037 | 10.909  | 23.563 | 0.227011 | 22.0488806 | 0.030975176 |
| 51 | 0.19911 | 12.9452 | 46.563 | 0.687769 | 66.8008888 | 0.116514351 |
| 52 | 0.19707 | 13.7912 | 57.233 | 0.794465 | 77.1639433 | 0.133210677 |
| 53 | 0.10353 | 13.9953 | 60.109 | 0.823241 | 79.9588677 | 0.07251652  |
| 54 | 0.1882  | 13.6429 | 54.882 | 0.765239 | 74.3253118 | 0.122535087 |
| 55 | 0.11839 | 13.1852 | 49.839 | 0.751321 | 72.9734992 | 0.075680553 |
| 56 | 0.19909 | 14.499  | 68.131 | 0.903623 | 87.7661243 | 0.153066613 |
| 57 | 0.10173 | 10.0506 | 15.849 | 0.092939 | 9.02687938 | 0.008044347 |
| 58 | 0.11477 | 12.3255 | 39.218 | 0.464055 | 45.0722357 | 0.045314959 |
| 59 | 0.12176 | 12.3888 | 39.803 | 0.521891 | 50.6896686 | 0.054066493 |
| 60 | 0.19812 | 12.2467 | 38.122 | 0.419045 | 40.7005527 | 0.070637079 |
| 61 | 0.14555 | 12.194  | 36.286 | 0.272067 | 26.4250314 | 0.033692391 |
| 62 | 0.18235 | 12.5432 | 39.924 | 0.590353 | 57.3391722 | 0.091592791 |
| 63 | 0.18723 | 12.0402 | 34.157 | 0.234019 | 22.7295461 | 0.03727952  |
| 64 | 0.2     | 12.29   | 37.001 | 0.427683 | 41.5395351 | 0.072777266 |
| 65 | 0.12925 | 10.4935 | 19.748 | 0.193939 | 18.8366989 | 0.021327476 |
| 66 | 0.10105 | 10.525  | 20.027 | 0.360808 | 35.0441719 | 0.031021031 |
| 67 | 0.16517 | 14.4505 | 67.288 | 0.895807 | 87.0069803 | 0.12588946  |
| 68 | 0.14869 | 14.3822 | 66.263 | 0.842513 | 81.8306979 | 0.106586481 |
| 69 | 0.13311 | 13.3572 | 52.066 | 0.573379 | 55.6905397 | 0.064937597 |
| 70 | 0.10145 | 10.5483 | 20.261 | 0.195224 | 18.961507  | 0.016851129 |
| 71 | 0.17331 | 10.5219 | 20.043 | 0.288514 | 28.0224779 | 0.042543603 |
| 72 | 0.15263 | 10.5261 | 20.094 | 0.355223 | 34.5017181 | 0.046130136 |
| 73 | 0.1     | 13.466  | 54.12  | 0.692583 | 67.2684578 | 0.058927169 |
| 74 | 0.1     | 14.5    | 67.41  | 0.819158 | 79.5622985 | 0.069696573 |
| 75 | 0.19775 | 14.4028 | 66.182 | 0.858552 | 83.3885166 | 0.144453093 |
| 76 | 0.11677 | 10.5449 | 20.13  | 0.190198 | 18.4733471 | 0.018896483 |
| 77 | 0.12524 | 11.6656 | 31.411 | 0.290907 | 28.2549027 | 0.030998522 |
| 78 | 0.1297  | 14.4989 | 67.952 | 0.796329 | 77.3449879 | 0.08787721  |
| 79 | 0.17576 | 14.5    | 68.3   | 0.975133 | 94.7116708 | 0.145823544 |
| 80 | 0.14697 | 10.0002 | 15.42  | 0.118176 | 11.4780716 | 0.014777526 |
| 81 | 0.18865 | 11.7409 | 32.482 | 0.225615 | 21.9132914 | 0.036213336 |

|    |         |         |        |          |            |             |
|----|---------|---------|--------|----------|------------|-------------|
| 82 | 0.11754 | 14.4997 | 67.304 | 0.77118  | 74.9023428 | 0.077123227 |
| 83 | 0.17818 | 10.0003 | 16.025 | 0.114992 | 11.1688195 | 0.017432928 |
| 84 | 0.11092 | 10      | 16.01  | 0.175406 | 17.0366456 | 0.016553813 |

**Reaction condition:** compound **2a** (0.1 M in EtOAc); reagent **5a** (0.2 M in EtOAc); 1 mL reactor volume.

**Graph:** We have plotted 3D graph of optimization table S6, we have taken flow rate on X-axis, blue light intensity (watt) on Y-axis and product yield on Z axis.

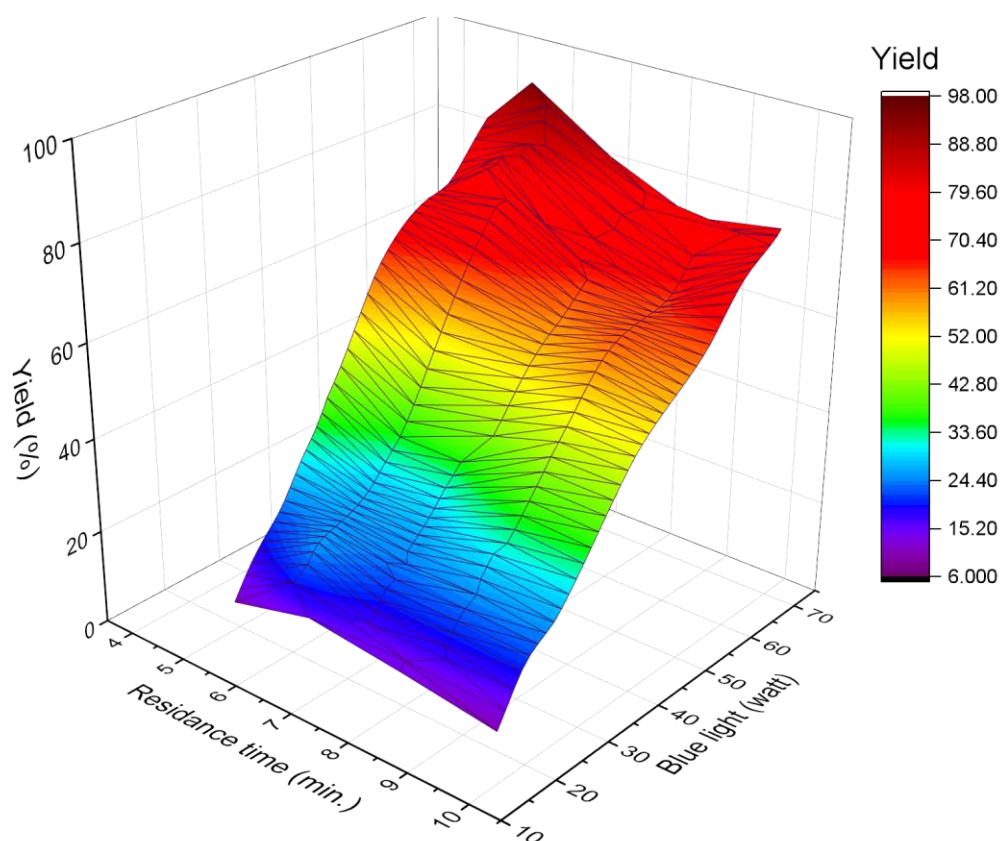

**Figure S21.** AI based system to auto-optimize and navigate this complexity and identify the optimal conditions for the photo activated S-H insertion reaction. Compound **2a** (0.1 M in EtOAc); reagent **5a** (0.2 M in EtOAc); 1 mL reactor volume.

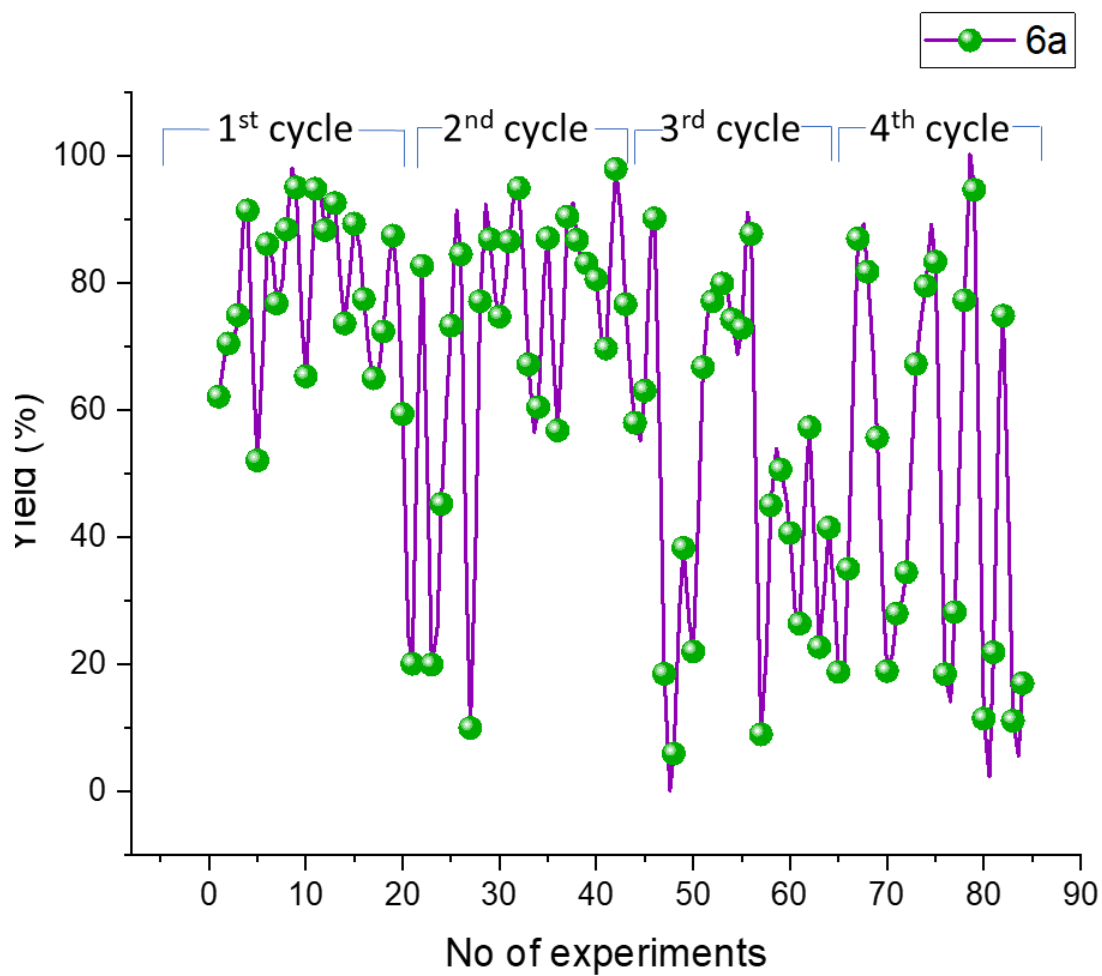

**Figure S22.** 2D graph between no of experiments performed versus yield (%) for the AI based auto-optimization of photo activated S-H insertion reaction. Compound **2a** (0.1 M in EtOAc); reagent **5a** (0.2 M in EtOAc); 1 mL reactor volume.



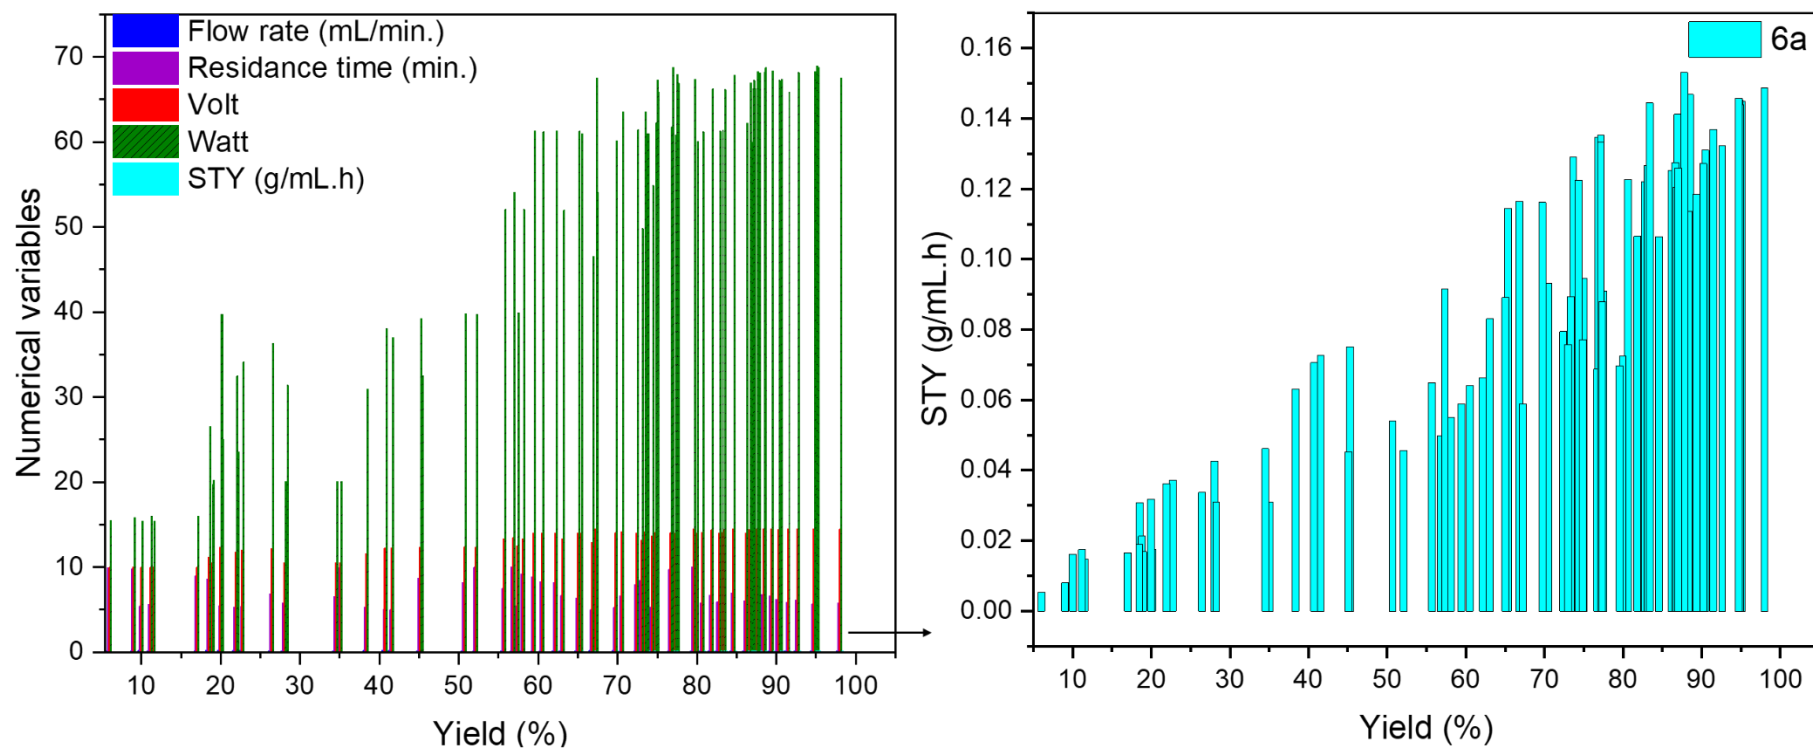

**Figure S23.** AI based system navigated multi-numerical variable complexity and identify the optimal condition for the photo activated S-H insertion reaction. Compound **2a** (0.1 M in EtOAc); reagent **5a** (0.2 M in EtOAc); 1 mL reactor volume.

### S4.3. General procedure of running AI-optimized condition for longer time for synthesis of compound (6a).

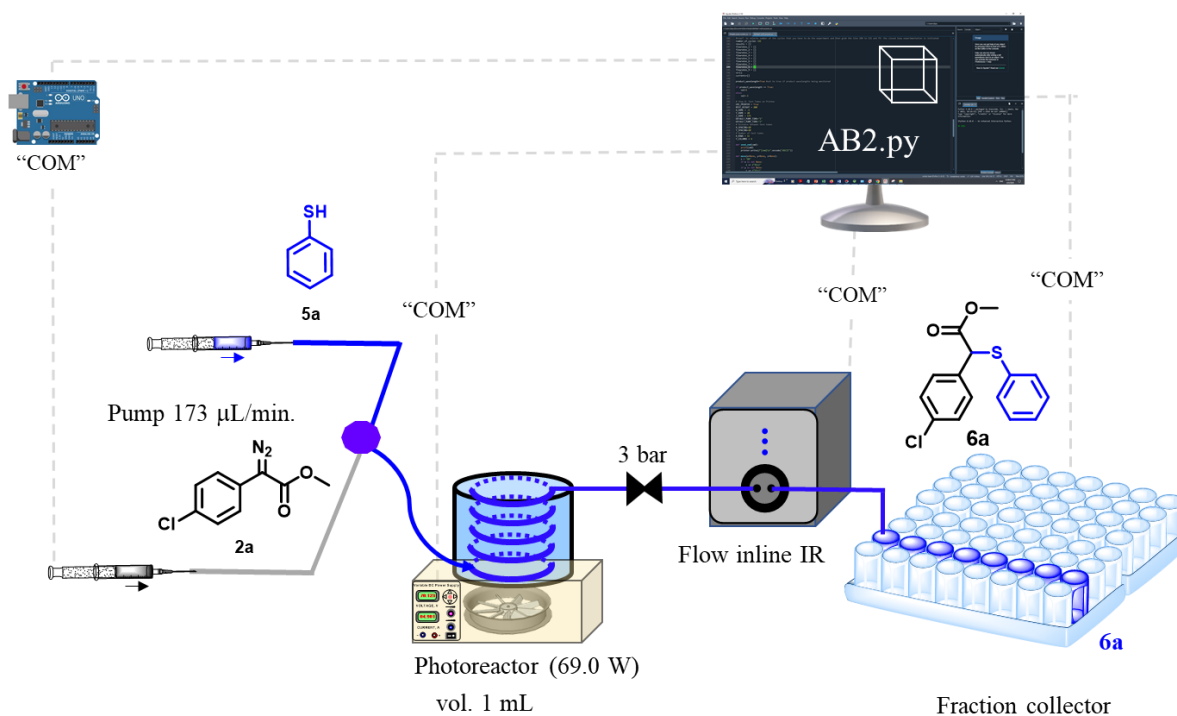

**Figure S24.** Schematic presentation of continuous flow for the synthesis, of compound **6a**.

To prepare the stock solution of compound **2a** (2.20 g, 0.01 mol) was dissolved in ethyl acetate (100 mL) charged in one syringe, another syringe charged with the reagent **5a** (1.9 mL, 0.02 mol) dissolved in ethyl acetate (100 mL). These two syringes connected via pump and out-put is further connected with the T1-mixer and both syringes were running with the 173 µL/min. flow rate to maintain the stoichiometry and then passed through PFA tubular reactor (id = 1000 µm, l = 1.3 m, vol. = 1 mL) under blue light (69W) exposure. The room temperature of the reactor was controlled by fan attached to the bottom of the photochemical reactor. The out-put of the tubular reactor was connected with spring based back pressure regulator (~3 bar) to maintain the evaporation. Then outcoming first one hour of the product mixture **6a** was discarded and next 5 h of the product mixture [52 mL; **2a** (0.546 g)] was collected in HPLC bottle. The EtOAc reaction mixture washed it with 10% aq. NaOH and separated through the separating funnel. The organic EtOAc phase was concentrated under reduced pressure to give

the product **6a** (0.74 g in 5 h, 97.98%) as a colorless oil. **<sup>1</sup>H NMR (400 MHz, CDCl<sub>3</sub>)** δ 7.37 – 7.33 (m, 4H), 7.29 – 7.25 (m, 5H), 4.86 (s, 1H), 3.67 (s, 3H). **<sup>13</sup>C NMR (101 MHz, CDCl<sub>3</sub>)** δ 170.55, 134.32, 133.16, 133.10, 129.98, 129.14, 128.89, 128.40, 55.73, 52.88. **IR (ν<sub>max</sub>):** 3021.35, 2952.59, 1737.18, 1487.9, 1214.19, 829.21 cm<sup>-1</sup>. **HRMS (ESI):** *m/z* calcd for **C<sub>15</sub>H<sub>14</sub>ClO<sub>2</sub>S** [M+H]<sup>+</sup> 293.0398, found 293.0404. Verified the analytical data with those reported in the literature.<sup>4</sup>

#### Space time yield in previous reported batch process <sup>4</sup>

Productivity = 130 mg in 12 h

$$\text{Productivity (per h)} := \frac{0.130}{12} = 0.011 \text{ g/h}$$

$$\text{Space time yield} := \frac{\text{productivity}}{\text{volume of reactor}}$$

$$= \frac{0.011}{1} = 0.011 \text{ g mL}^{-1} \text{ h}^{-1}$$

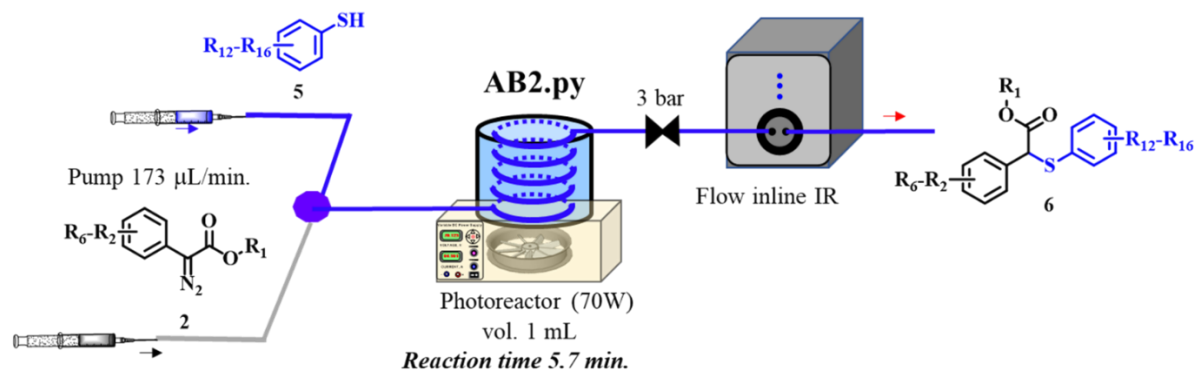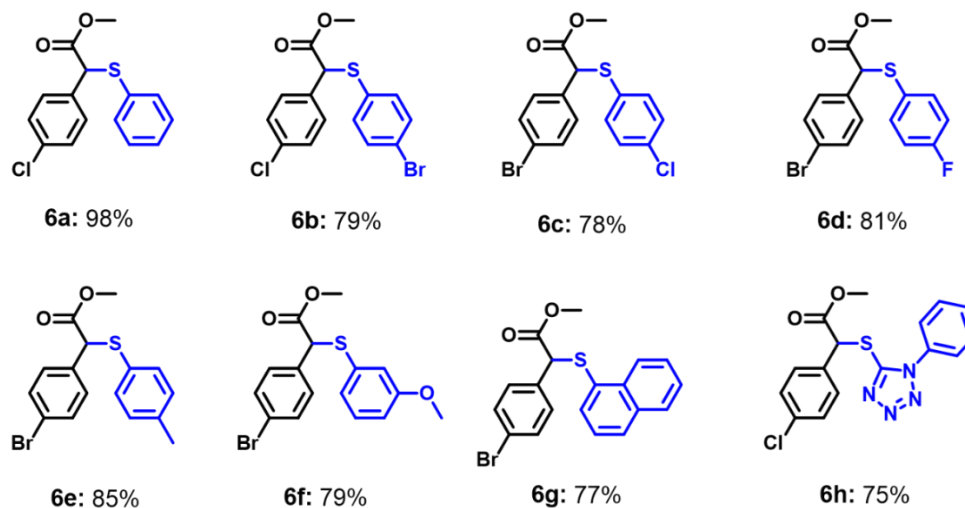

**Figure S25.** Scope of substrate for the photo activated S-H insertion reaction. Compound **2** (0.1 M in EtOAc); reagent **5** (0.2 M in EtOAc); 1 mL reactor volume.

#### S4.3.2. General procedure for scope of substrate for carbene insertion into the S–H bonds of organic aromatic thiol for synthesis of compound **6b–6h**.

**Example 18.** Methyl 2-((4-bromophenyl)thio)-2-(4-chlorophenyl)acetate (**6b**).

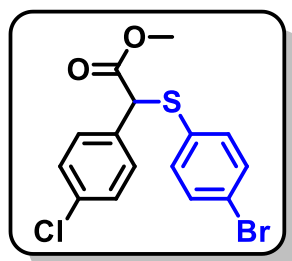

The title compound was synthesised following the general procedure described in section 4.3, and involve corresponding reactant exchange with compound **2a** and compound **5b** (4-bromobenzenethiol). The crude mixture was concentrated under vacuum and the product was

purified by flash chromatography;  $R_f = 0.5$  (5% ethylacetate/hexane); to give compound **6b** (0.76 g in 5 h, 79%) as a colorless oil.  $^1\text{H NMR}$  (400 MHz,  $\text{CDCl}_3$ )  $\delta$  7.39 – 7.32 (m, 4H), 7.30 – 7.25 (m, 2H), 7.22 – 7.17 (m, 2H), 4.83 (s, 1H), 3.68 (s, 3H).  $^{13}\text{C NMR}$  (126 MHz,  $\text{CDCl}_3$ )  $\delta$  170.23, 137.70, 134.68, 132.24, 129.94, 128.98, 122.88, 55.62, 52.98.  $\text{IR}$  ( $\nu_{\text{max}}$ ): 3020.98, 1736.81, 1483.63, 1214.01, 817.91, 667.71  $\text{cm}^{-1}$ .  $\text{HRMS}$  (ESI):  $m/z$  calcd. for  $\text{C}_{15}\text{H}_{13}\text{BrClO}_2\text{S}$   $[\text{M}+\text{H}]^+$  370.9503, found 370.9509.

**Example 19.** Methyl 2-(4-bromophenyl)-2-((4-chlorophenyl)thio)acetate (**6c**).

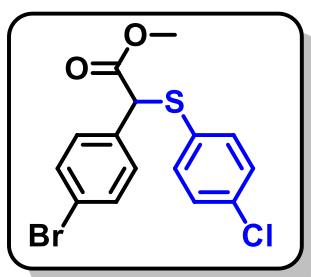

The title compound was synthesised following the general procedure described in section 4.3, and involve corresponding reactant exchange with compound **2b** and compound **5c** (4-chlorobenzenethiol). The crude mixture was concentrated under vacuum and the product was purified by flash chromatography;  $R_f = 0.5$  (5% ethylacetate/hexane); to give compound **6c** (0.75 g in 5 h, 78%) as a colorless oil.  $^1\text{H NMR}$  (400 MHz,  $\text{CDCl}_3$ )  $\delta$  7.42 (d,  $J = 8.4$  Hz, 2H), 7.28 – 7.25 (m, 4H), 7.21 (d,  $J = 8.6$  Hz, 2H), 4.81 (s, 1H), 3.66 (s, 3H).  $^{13}\text{C NMR}$  (126 MHz,  $\text{CDCl}_3$ )  $\delta$  170.15, 134.75, 134.59, 134.47, 131.91, 131.43, 130.26, 129.30, 122.66, 55.79, 52.96.  $\text{IR}$  ( $\nu_{\text{max}}$ ): 3019.95, 2952.20, 1735.81, 1497.43, 1213.23, 817.44, 626.54  $\text{cm}^{-1}$ .  $\text{HRMS}$  (ESI):  $m/z$  calcd for  $\text{C}_{15}\text{H}_{13}\text{BrClO}_2\text{S}$   $[\text{M}+\text{H}]^+$  370.9503, found 370.9510.

**Example 20.** Methyl 2-(4-bromophenyl)-2-((4-fluorophenyl)thio)acetate (**6d**).

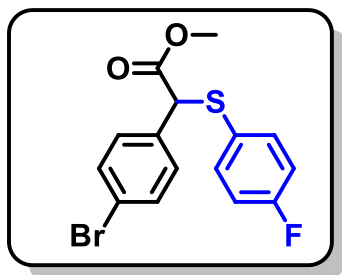

The title compound was synthesised following the general procedure described in section 4.3, and involve corresponding reactant exchange with compound **2b** and compound **5d** (4-fluorobenzenethiol). The crude mixture was concentrated under vacuum and the product was purified by flash chromatography;  $R_f = 0.5$  (5% ethylacetate/hexane); to give compound **6d** (0.74 g in 5 h, 81%) as a colorless oil.  $^1\text{H NMR}$  (500 MHz,  $\text{CDCl}_3$ )  $\delta$  7.42–7.40 (m, 2H), 7.34–7.32 (m, 2H), 7.27–7.24 (m, 2H), 6.96–6.92 (m, 2H), 4.77 (s, 1H), 3.64 (s, 3H).  $^{13}\text{C NMR}$  (101 MHz,  $\text{CDCl}_3$ )  $\delta$  170.25, 164.38, 161.90, 136.37, 136.29, 134.63, 131.81, 130.29, 127.85, 127.82, 122.52, 116.34, 116.13, 56.26, 52.83.  $^{19}\text{F NMR}$  (471 MHz,  $\text{CDCl}_3$ )  $\delta$  -111.71. IR ( $\nu_{\text{max}}$ ): 3021.30, 1737.68, 1437.42, 1216.36, 828.38, 668.88  $\text{cm}^{-1}$ . HRMS (ESI):  $m/z$  calcd for  $\text{C}_{15}\text{H}_{13}\text{BrFO}_2\text{S}$   $[\text{M}+\text{H}]^+$  354.9798, found 354.9802.

**Example 21.** Methyl 2-(4-bromophenyl)-2-(p-tolylthio)acetate (**6e**).

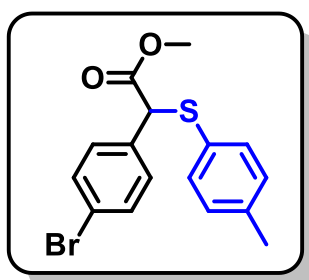

The title compound was synthesised following the general procedure described in section 4.3, and involve corresponding reactant exchange with compound **2b** and compound **5e** (4-methylbenzenethiol). The crude mixture was concentrated under vacuum and the product was purified by flash chromatography;  $R_f = 0.5$  (5% ethylacetate/hexane); to give compound **6e** (0.77 g in 5 h, 85%) as a colorless oil.  $^1\text{H NMR}$  (400 MHz,  $\text{CDCl}_3$ )  $\delta$  7.42 (d,  $J = 8.5$  Hz, 2H),

7.30 – 7.24 (m, 4H), 6.79 (d,  $J = 8.9$  Hz, 2H), 4.70 (s, 1H), 3.77 (s, 3H), 3.66 (s, 3H).  $^{13}\text{C}$  NMR (101 MHz,  $\text{CDCl}_3$ )  $\delta$  170.57, 160.44, 136.48, 135.02, 131.72, 130.36, 123.05, 122.33, 114.63, 56.67, 55.36, 52.75. IR ( $\nu_{\text{max}}$ ): 3020.59, 1735.43, 1437.72, 1214.76, 1010.62, 826.89  $\text{cm}^{-1}$ . HRMS (ESI):  $m/z$  calcd for  $\text{C}_{16}\text{H}_{16}\text{BrO}_2\text{S}$   $[\text{M}+\text{H}]^+$  351.0049, found 351.0055.

**Example 22.** Methyl 2-(4-bromophenyl)-2-((3-methoxyphenyl)thio)acetate (**6f**).

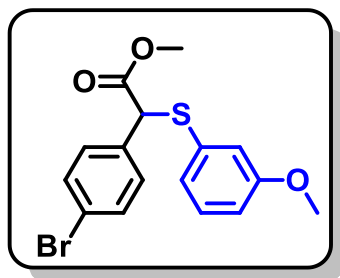

The title compound was synthesised following the general procedure described in section 4.3, and involve corresponding reactant exchange with compound **2b** and compound **5f** (3-methoxybenzenethiol). The crude mixture was concentrated under vacuum and the product was purified by flash chromatography;  $R_f = 0.5$  (5% ethylacetate/hexane); to give compound **6f** (0.74 g in 5 h, 79%) as a yellow oil.  $^1\text{H}$  NMR (500 MHz,  $\text{CDCl}_3$ )  $\delta$  7.44 – 7.42 (m, 2H), 7.31 – 7.30 (m, 2H), 7.18 – 7.14 (m, 1H), 6.93 – 6.91 (m, 1H), 6.86 – 6.85 (m, 1H), 6.80 – 6.78 (m, 1H), 4.87 (s, 1H), 3.71 (s, 3H), 3.67 (s, 3H).  $^{13}\text{C}$  NMR (101 MHz,  $\text{CDCl}_3$ )  $\delta$  170.39, 159.74, 134.82, 134.33, 131.82, 130.25, 129.89, 124.70, 122.47, 117.58, 114.29, 55.56, 55.26, 52.90. IR ( $\nu_{\text{max}}$ ): 3019.75, 1737.02, 1481.61, 1215.45, 669.75  $\text{cm}^{-1}$ . HRMS (ESI):  $m/z$  calcd for  $\text{C}_{16}\text{H}_{16}\text{BrO}_3\text{S}$   $[\text{M}+\text{H}]^+$  366.9998, found 366.9993.

**Example 23.** Methyl 2-(4-bromophenyl)-2-(naphthalen-1-ylthio)acetate (**6g**).

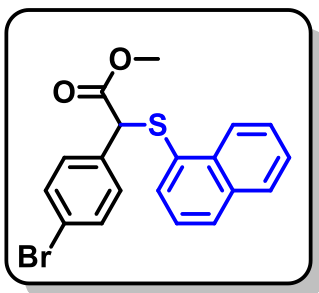

The title compound was synthesised following the general procedure described in section 4.3, and involve corresponding reactant exchange with compound **2b** and compound **5g** (3-methoxybenzenethiol). The crude mixture was concentrated under vacuum and the product was purified by flash chromatography;  $R_f = 0.5$  (5% ethylacetate/hexane); to give compound **6g** (0.77 g in 6 h, 77%) as a colorless oil.  $^1\text{H NMR}$  (400 MHz,  $\text{CDCl}_3$ )  $\delta$  7.83 (d,  $J = 1.4$  Hz, 1H), 7.77 – 7.74 (m, 1H), 7.72 – 7.69 (m, 2H), 7.50 – 7.42 (m, 3H), 7.41 – 7.38 (m, 2H), 7.33 – 7.31 (m, 2H), 4.95 (s, 1H), 3.64 (s, 3H).  $^{13}\text{C NMR}$  (101 MHz,  $\text{CDCl}_3$ )  $\delta$  170.47, 134.80, 133.56, 132.77, 132.22, 131.88, 130.50, 130.29, 129.72, 128.75, 127.74, 127.66, 126.74, 126.69, 122.55, 55.73, 52.92. **IR** ( $\nu_{\text{max}}$ ): 3053.68, 2951.64, 1738.16, 1489.43, 1212.16, 634.22  $\text{cm}^{-1}$ . **HRMS** (ESI):  $m/z$  calcd for  $\text{C}_{19}\text{H}_{16}\text{BrO}_2\text{S}$   $[\text{M}+\text{H}]^+$  387.0049, found 387.0053.

**Example 24.** Methyl 2-(4-chlorophenyl)-2-((1-phenyl-1H-tetrazol-5-yl)thio)acetate (**6h**).

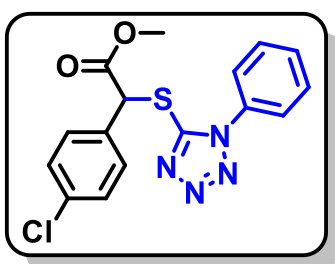

The title compound was synthesised following the general procedure described in section 4.3, and involve corresponding reactant exchange with compound **2a** and compound **5h** (1-phenyl-1H-tetrazole-5-thiol). The crude mixture was concentrated under vacuum and the product was purified by flash chromatography;  $R_f = 0.5$  (5% ethylacetate/hexane); to give compound **6h** (0.70 g in 6 h, 75%) as a colorless oil.  $^1\text{H NMR}$  (400 MHz,  $\text{CDCl}_3$ )  $\delta$  7.56 – 7.49 (m, 5H),



7.45 – 7.42 (m, 2H), 7.32 – 7.29 (m, 2H), 5.78 (s, 1H), 3.76 (s, 3H). **<sup>13</sup>C NMR (126 MHz, CDCl<sub>3</sub>)** δ 169.17, 152.44, 135.38, 133.34, 132.35, 130.39, 129.93, 129.92, 129.38, 123.77, 54.07, 53.70. **IR (ν<sub>max</sub>):** 3018.80, 2955.24, 1741.03, 1216.96, 1009.64, 832.24 cm<sup>-1</sup>. **HRMS (ESI):** *m/z* calcd for C<sub>16</sub>H<sub>14</sub>ClN<sub>4</sub>O<sub>2</sub>S [M+H]<sup>+</sup> 361.0521, found 361.0526

Table S7. Comparative result for the carbene insertion into S-H bonds of thiols.

| Entry | Compound 2a | Reagent 5a | Product 6a | Comparative result                                                                                                                                                         |
|-------|-------------|------------|------------|----------------------------------------------------------------------------------------------------------------------------------------------------------------------------|
| 1     |             |            |            | 98%, 5.7 min. (our study)<br>[(CH <sub>3</sub> CN) <sub>4</sub> Cu]PF <sub>6</sub> (5 mol%),<br>12-24 h, 89%<br>4<br>Fe(OTf) <sub>2</sub> (15 mol%), 24-48<br>h, 35 %<br>5 |

**S5. Case study-3:** Carbene insertion (C-N bond formation) single objective multi-variant auto-optimization.

### **S5.1. Background collection**

**Sample Preparation:** We prepare 0.5 M stock solution of compound **2a** in ethyl acetate, 0.5 M stock solution of reagent **7a** in ethyl acetate and 0.5 M stock solution of product **8a** in ethyl acetate. The three of the solution taken in three different syringes.

**Delivery system:** The HPLC pumps and syringe pump were directly interfaced to the main computer via an RS-232 interface or LAN. These pumps will help in introducing reactants and reagent solutions into the microreactor with varied flow rate as the central computer's prescribed flow rate (fr). The central computer and the HPLC pump communicated through serial communication using ASCII code to exchange information about flow rate, operational status, and duration. This facilitated the transmission of essential details from the main computer to the pumps, enabling them to commence their operations as required. To conduct our analysis, we utilized an In-line FTIR system. The experimental protocol involved the initial introduction of the solvent, ethyl acetate, for a duration of 10 min. using a syringe pump, during which data was recorded. Subsequently, a previously prepared stock solution of compound **2a** was similarly introduced into the In-line FTIR for 10 min. This process was repeated for the reaction product **8a** and reagent **7a**, each pumped for 10 min. Upon collecting all relevant data, we identified the signature peak present in the product. Using this peak as a reference, we employed a Bayesian optimizer to fine-tune and optimize the reaction conditions for improved results.

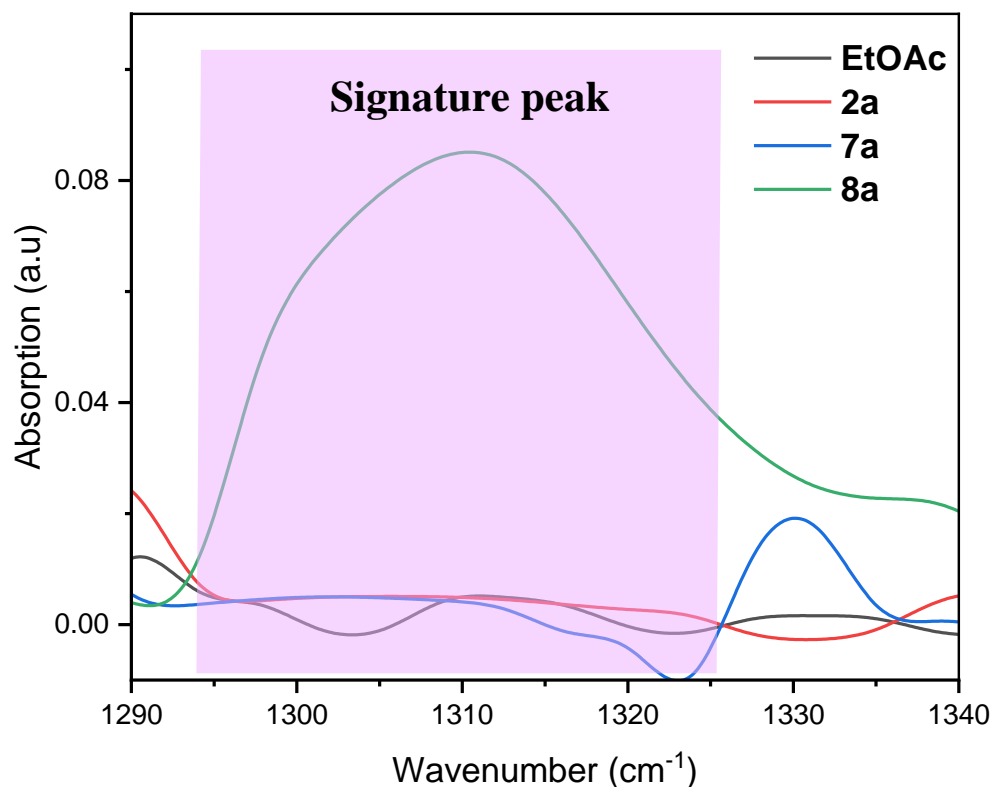

**Figure S26.** In-line IR background analysis of EtOAc, 0.5 M stock solution of **2a**, **7a**, and **8a** in EtOAc.

The distinctive C-N stretching associated with product (**8a**) aligning within the range of 1295 to 1325  $\text{cm}^{-1}$  was observed. This specific peak, falling within this range, is designated as the signature peak for our analysis. During the optimization of the reaction through Bayesian methods, this signature peak serves as a pivotal reference point. We utilize it to calculate the area under the curve in the In-line FT-IR spectra, providing a quantitative measure of the area in the forthcoming reaction mixture.

### S5.2. General procedure for the auto-optimized synthesis of compound **8a**.

Initial steps involved the preparation of stock solutions for compound **2a** (0.1 M in EtOAc) and reagent **7a** (0.3 M in EtOAc), each filled into separate syringes and connected to a syringe pump. The solutions were then directed through a PFA tubular reactor (inner diameter = 1 mm,

length = 1.3 m, volume = 1 mL) surrounded by a cylindrical-shaped blue LED light source. Once the solution setup was complete, input ranges for variable flow rates, voltages, and current were specified in the Python code designed for the reaction. The Bayesian optimizer systematically explored these varying reaction conditions, aiming to achieve maximum yield. The optimization process involved running 40-44 experiments and the results were tabulated in the optimization table (Table S8).

### S5.2.1. Python code for optimizing condition of carbene insertion reaction (C-N bond formation).

```
ab3.py
1 from os import listdir
2 from os.path import isfile, join
3 import serial
4
5 import numpy as np
6 import pandas as pd
7 import time
8 from scipy.integrate import trapz
9
10 #step1: be sure to the address of the files that the ftir data is exported is matching to line 11 (mypath)
11 mypath = "C:\\Users\\Admin\\Desktop\\ruchi\\Exp 2024-02-27 13-13"
12 onlyfiles = [f for f in listdir(mypath) if isfile(join(mypath, f))]
13
14 #step2: make sure that pump and the potentiostat is correctly addressed in the line 16 and 17
15 pump_1 = serial.Serial("COM15",9600) #Syringe Pump
16 port = serial.Serial("COM1",115200)
17 printer = serial.Serial("COM14", 115200, timeout=1)
18
19 r_1=13.36 #radius of syringe used (50ml,14.25|20ml,9.6|10ml,7.25|5ml,6.03|3ml,4/3|1ml,2.39|60ml,13.36)
20 pump_1_k=(13.36/r_1)**2
21
22 #step 3: grab the lines from 22 to 90 and presss f9
23 def area_under(data,start,end):
24     x = np.flip(data.iloc[start:end,0].to_numpy())
25     y = np.flip(data.iloc[start:end,1].to_numpy())
26     area = trapz(y,x)
27     return np.abs(area)
28
29 def file_namer(num):
30     str1 = str(num)
31     length = int(len((str1)))
32     empt = ''
33     for i in range(5-length):
34         empt = empt+'0'
35
36     return empt+str1
37
38
39 def ftir_extract(filename,init,end):
40
41     filename = filename
42
43     temp_df = pd.read_csv(filename)
44     # nump_df = temp_df.to_numpy()
45     area = area_under(temp_df, init, end)
46     # max_peak = np.max(nump_df[90:120,1])
47     print(area)
```

```

48
49     return area
50
51
52 def function(flowrate_1,v,i):
53
54     #set the pumps with the flowrate as the desired flowrate for the function
55
56     fr_1 = flowrate_1*1000*pump_1_k    #mL/min to microliter/min and syringe correction factor
57     send_syr_command(f'fr{fr_1}')
58     time.sleep(0.1)
59
60     #set the com port for potentiostat and set the voltage and current
61     vol = v
62     curr = i
63     port.write(('VOLT '+str(vol)+'\r\n').encode())    #to change the voltge we need to use "VOLT 1" command
64     port.write(('CURR '+str(curr)+'\r\n').encode())    #to change the current we need to use "CURR 1" command
65
66
67     #pumps run
68     time.sleep(0.1)
69     time.sleep(1000)
70
71 def function2():
72     time.sleep(1000)
73
74     files = [f for f in listdir(mypath) if isfile(join(mypath, f))]
75
76     val = 0
77
78     #change wavelengths as per product here.
79     f_row=16 #first row of range for wavelength as per IR CSV
80     l_row=24 #Last row of range for wavelength as per IR CSV
81
82     val += ftir_extract(files[-1],f_row,l_row)
83     val+=ftir_extract(files[-2],f_row,l_row)
84     val+=ftir_extract(files[-3],f_row,l_row)
85
86     avg_val = val/3
87
88     return avg_val
89
90
91 #step 4:grab the line 93 and f9
92 from skopt.optimizer import Optimizer
93
94

```

```

95 def send_syr_command(command):
96     pump_1.write(command.encode() + b'\n') # Send the command to Arduino with a newline character
97     pump_1.flush() # Flush the serial buffer
98
99
100 #step5: in line 96 we have to define the range that (flowrate,voltage,current) (from,to) and after (anytime) applying changes you need to grab the line 96 and f9
101 #flowrates are in ml/min, voltage in V, Current in Ampere
102 bounds = [(0.05,0.2),(10,14.5),(4.9,5.0)]
103
104 #step 6: grab the line 100 and f9
105 opter =Optimizer(bounds,base_estimator='gp',n_initial_points=3,acq_func="EI",random_state=np.random.randint(3326))
106
107
108 #step7: to selecte number of the cycles that you have to do the experiment and then grab the line 104 to 121 and f9: the closed loop experimentation is initiated
109 number_of_cycles = 22
110 results = []
111 flowrates_1 = []
112 vs = []
113 currents = []
114
115 product_wavelength=True #set to true if product wavelengths being monitored
116
117 if product_wavelength == True:
118     val=1
119 else:
120     val=-1
121
122
123 # Step 8: Test Tubes on Printer
124 USE_PRINTER = True
125 REST_HEIGHT = 200
126 X_HOME = -5
127 Y_HOME = 20
128 Z_HOME = 175
129 DEFAULT_PUMP_TIME="1"
130 # Distance between test tubes
131 X_SPACING=20
132 Y_SPACING=20
133 # Number of test tubes
134 X_ROWS = 11
135 Y_COLUMNS = 4
136
137 def send_cmd(cmd):
138     print(cmd)
139     printer.write(f"{cmd}\n".encode("ASCII"))
140
141 def move(x=None, y=None, z=None):

```

```

142 s = "G0"
143 if x is not None:
144     s += f"X{x}"
145 if y is not None:
146     s += f"Y{y}"
147 if z is not None:
148     s += f"Z{z}"
149
150 s+= "F5000"
151 send_cmd(s)
152
153 def printer_positions():
154     for j in range(Y_COLUMNS):
155         for i in range(X_ROWS):
156             if j%2==1:
157                 yield (X_HOME + (X_ROWS - 1 - i) * X_SPACING, Y_HOME + j * Y_SPACING, Z_HOME)
158             else:
159                 yield (X_HOME + i * X_SPACING, Y_HOME + j * Y_SPACING, Z_HOME)
160
161 # Run this.
162 tube_location = list(printer_positions())
163
164 time.sleep(2)
165
166 for i in range(number_of_cycles):
167     move(*tube_location[2*i])
168     asked = opter.ask()
169     print (asked[0])
170     function(asked[0],asked[1],asked[2])
171     move(*tube_location[2*i+1])
172     told = function2()
173
174     print(f"area under the curve in the round {i:.2f} = {told: .2f}")
175     opter.tell(asked,-told*val)
176     results.append(told)
177     flowrates_1.append(asked[0])
178     vs.append(asked[1])
179     currents.append(asked[2])
180
181     dict1 = {"flowrate_1":flowrates_1,"voltages":vs, "currents":currents,"area-results":results}
182     df2 = pd.DataFrame(dict1)
183     df2.to_csv("output round "+str(i)+".csv")
184
185
186
187 send_syr_command("stop")    #turns off syringe pump flow
188

```



**Table S8.** Auto-optimization table of carbene insertion reaction (C-N bond formation).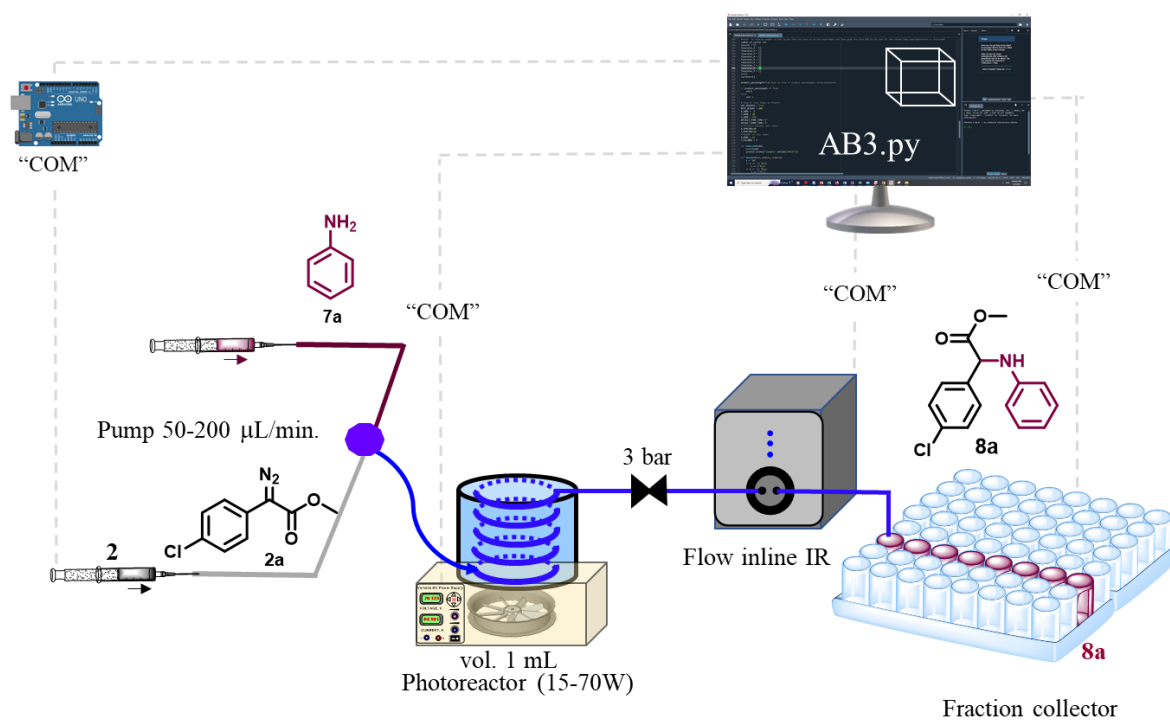

| No. of experiments | Flow rate mL/min | Voltage (V)    | Light intensity (W) | area-results    | Yield (%)         | Spacetime yield (g mL <sup>-1</sup> h <sup>-1</sup> ) |
|--------------------|------------------|----------------|---------------------|-----------------|-------------------|-------------------------------------------------------|
| 1                  | 0.118968         | 12.38799       | 40.459              | 1.196524        | 71.6165410        | 0.0702906                                             |
| 2                  | 0.093580         | 10.18322       | 17.197              | 0.279182        | 16.7101331        | 0.012900                                              |
| 3                  | 0.111095         | 13.78164       | 59.183              | 1.514104        | 90.6249622        | 0.0830608                                             |
| 4                  | 0.05             | 11.07727       | 25.851              | 0.628177        | 37.5988264        | 0.0155095                                             |
| 5                  | 0.066191         | 14.23180       | 65.638              | 1.482614        | 88.7401704        | 0.0484595                                             |
| 6                  | 0.061313         | 10.04277       | 15.985              | 0.343314        | 20.5487147        | 0.0103943                                             |
| 7                  | 0.115638         | 13.65416       | 57.251              | 1.346334        | 80.5832479        | 0.0768775                                             |
| 8                  | 0.069548         | 12.82883       | 17.25               | 0.234918        | 14.0607889        | 0.0080677                                             |
| 9                  | 0.099196         | 11.69255       | 69.716              | 1.506151        | 90.1489571        | 0.0737751                                             |
| 10                 | 0.093306         | 10.18078       | 17.163              | 0.291460        | 17.4450195        | 0.0134288                                             |
| <b>11</b>          | <b>0.092505</b>  | <b>14.3295</b> | <b>68.113</b>       | <b>1.537078</b> | <b>92.0000251</b> | <b>0.0702116</b>                                      |
| 12                 | 0.051560         | 14.48697       | 69.75               | 1.456641        | 87.1855572        | 0.0370862                                             |
| 13                 | 0.111049         | 13.75428       | 58.757              | 1.311133        | 78.4763496        | 0.0718964                                             |
| 14                 | 0.118626         | 10.00002       | 15.663              | 0.210988        | 12.6248993        | 0.0123556                                             |
| 15                 | 0.050115         | 10.06854       | 16.238              | 0.178406        | 10.6783159        | 0.0044149                                             |

|    |           |          |        |          |            |                  |
|----|-----------|----------|--------|----------|------------|------------------|
| 16 | 0.062578  | 13.06313 | 49.698 | 1.021805 | 61.158672  | 0.0315746        |
| 17 | 0.100030  | 12.22525 | 38.894 | 1.029414 | 61.6143808 | 0.0508472        |
| 18 | 0.05      | 10.10525 | 16.638 | 0.240613 | 14.4016513 | 0.0059406        |
| 19 | 0.111160  | 13.82081 | 60.249 | 1.373565 | 82.2131677 | 0.0753953        |
| 20 | 0.093994  | 11.74773 | 33.39  | 0.921292 | 55.1429018 | 0.0427608        |
| 21 | 0.122704  | 14.31194 | 67.567 | 1.225070 | 73.3251847 | 0.0742279        |
| 22 | 0.057572  | 10.62465 | 21.511 | 0.980855 | 58.7079763 | 0.0278848        |
| 23 | 0.086404  | 14       | 62.807 | 1.494519 | 89.4526871 | 0.0637649        |
| 24 | 0.148922  | 11       | 25.125 | 0.133867 | 8.01247153 | 0.0098441        |
| 25 | 0.052426  | 12       | 36.174 | 1.244392 | 74.4816629 | 0.0322148        |
| 26 | 0.15      | 11       | 25.18  | 0.156175 | 9.34772818 | 0.0115678        |
| 27 | 0.05      | 10.0673  | 15.564 | 0.303881 | 18.1884792 | 0.0075027        |
| 28 | 0.05      | 10       | 15.604 | 0.378768 | 22.6707418 | 0.0093516        |
| 29 | 0.15      | 13       | 48.67  | 1.093202 | 65.4323299 | 0.0809725        |
| 30 | 0.063750  | 11.6785  | 32.683 | 1.165559 | 69.7631768 | 0.0366912        |
| 31 | 0.052816  | 12.9356  | 47.678 | 1.242195 | 74.3501624 | 0.0323970        |
| 32 | 0.05      | 13.3951  | 53.794 | 1.265565 | 75.7489373 | 0.0312464        |
| 33 | 0.055842  | 11       | 29.217 | 0.797093 | 47.7090838 | 0.0219795        |
| 34 | 0.101936  | 14.0832  | 67.409 | 1.504863 | 90.0718120 | 0.0757479        |
| 35 | 0.05      | 13.0828  | 49.985 | 0.773444 | 46.2935985 | 0.0190961        |
| 36 | 0.132422  | 11       | 26.081 | 0.482431 | 28.8753526 | 0.0315458        |
| 37 | 0.05      | 10.085   | 16.437 | 0.105391 | 6.30806718 | 0.0026020        |
| 38 | 0.067590  | 12.315   | 40.073 | 1.017212 | 60.8840568 | 0.0339503        |
| 39 | 0.089018  | 14       | 63.507 | 1.528104 | 91.4628977 | 0.0671702        |
| 40 | 0.053891  | 11.315   | 28.469 | 0.783364 | 46.8873703 | 0.0208464        |
| 41 | 0.139535  | 13.38552 | 58.881 | 1.272373 | 76.1564519 | <b>0.0876686</b> |
| 42 | 0.1282496 | 11.937   | 35.17  | 0.748672 | 44.8109424 | 0.0474126        |
| 43 | 0.15      | 13.2041  | 51.367 | 0.640692 | 38.3479029 | 0.0474555        |
| 44 | 0.068291  | 14       | 62.656 | 1.513058 | 90.562340  | 0.0510233        |

---

**Reaction condition:** compound **2a** (0.1 M in EtOAc); reagent **7a** (0.3 M in EtOAc); 1 mL reactor volume.

**Graph:** We have plotted 3D graph of optimization table S8, we have taken flow rate on X-axis, blue light intensity (watt) on Y-axis and product yield on Z axis.

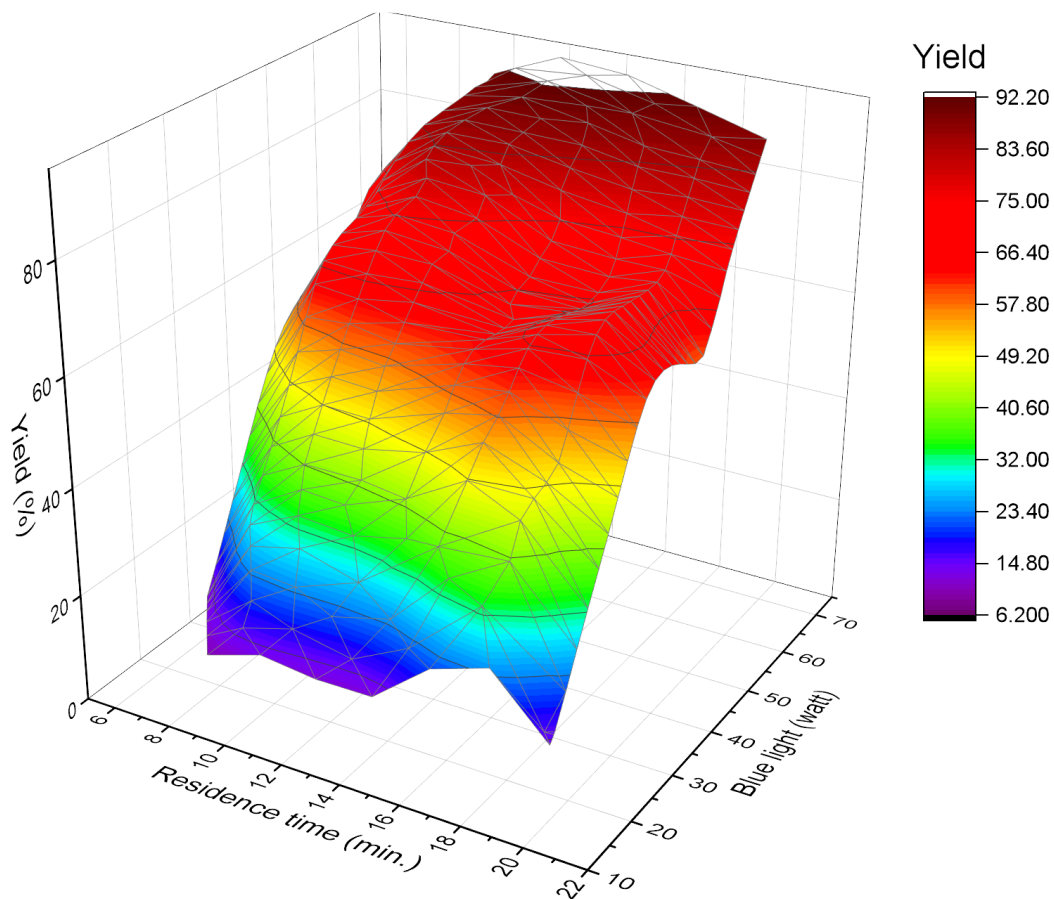

**Figure S27.** AI based system to auto-optimize and navigate this complexity and identify the optimal conditions for the photo activated N-H insertion reaction. Compound **2a** (0.1 M in EtOAc); reagent **7a** (0.3 M in EtOAc); 1 mL reactor volume.

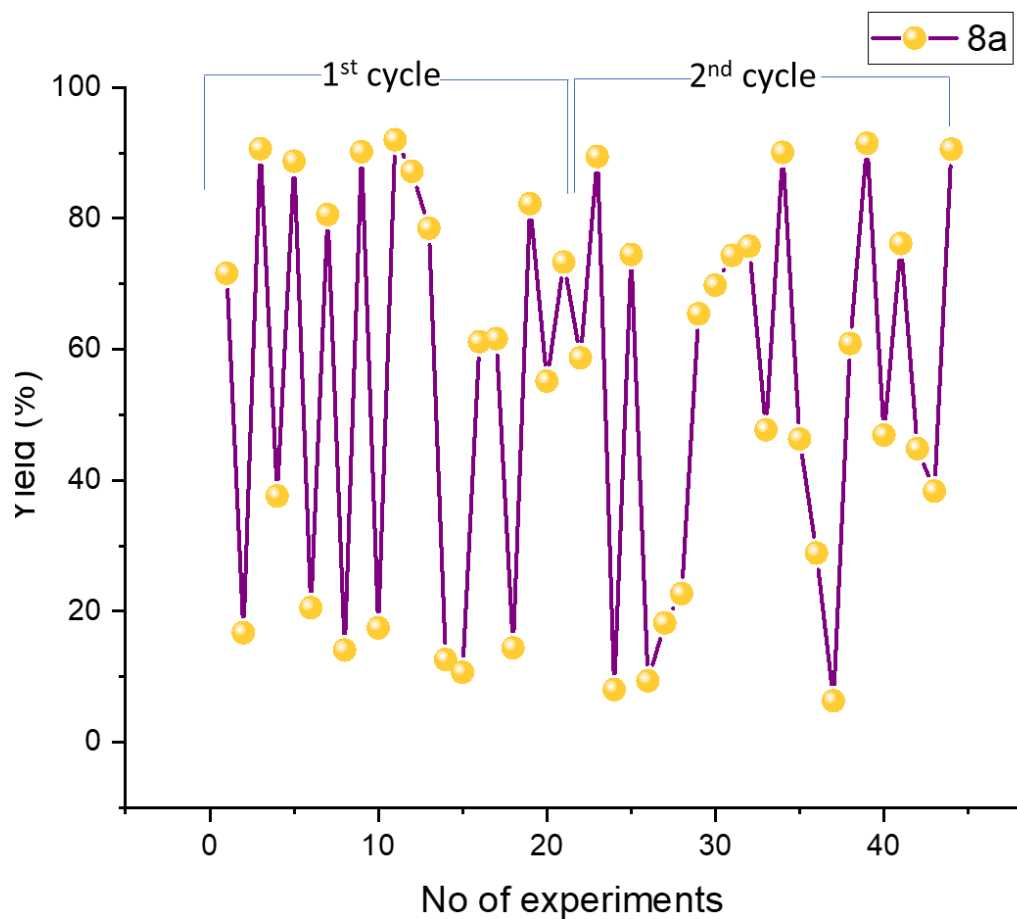

**Figure S28.** 2D graph between no of experiments performed versus yield (%) for the AI based auto-optimization of photo activated N-H insertion reaction. Compound **2a** (0.1 M in EtOAc); reagent **7a** (0.3 M in EtOAc); 1 mL reactor volume.

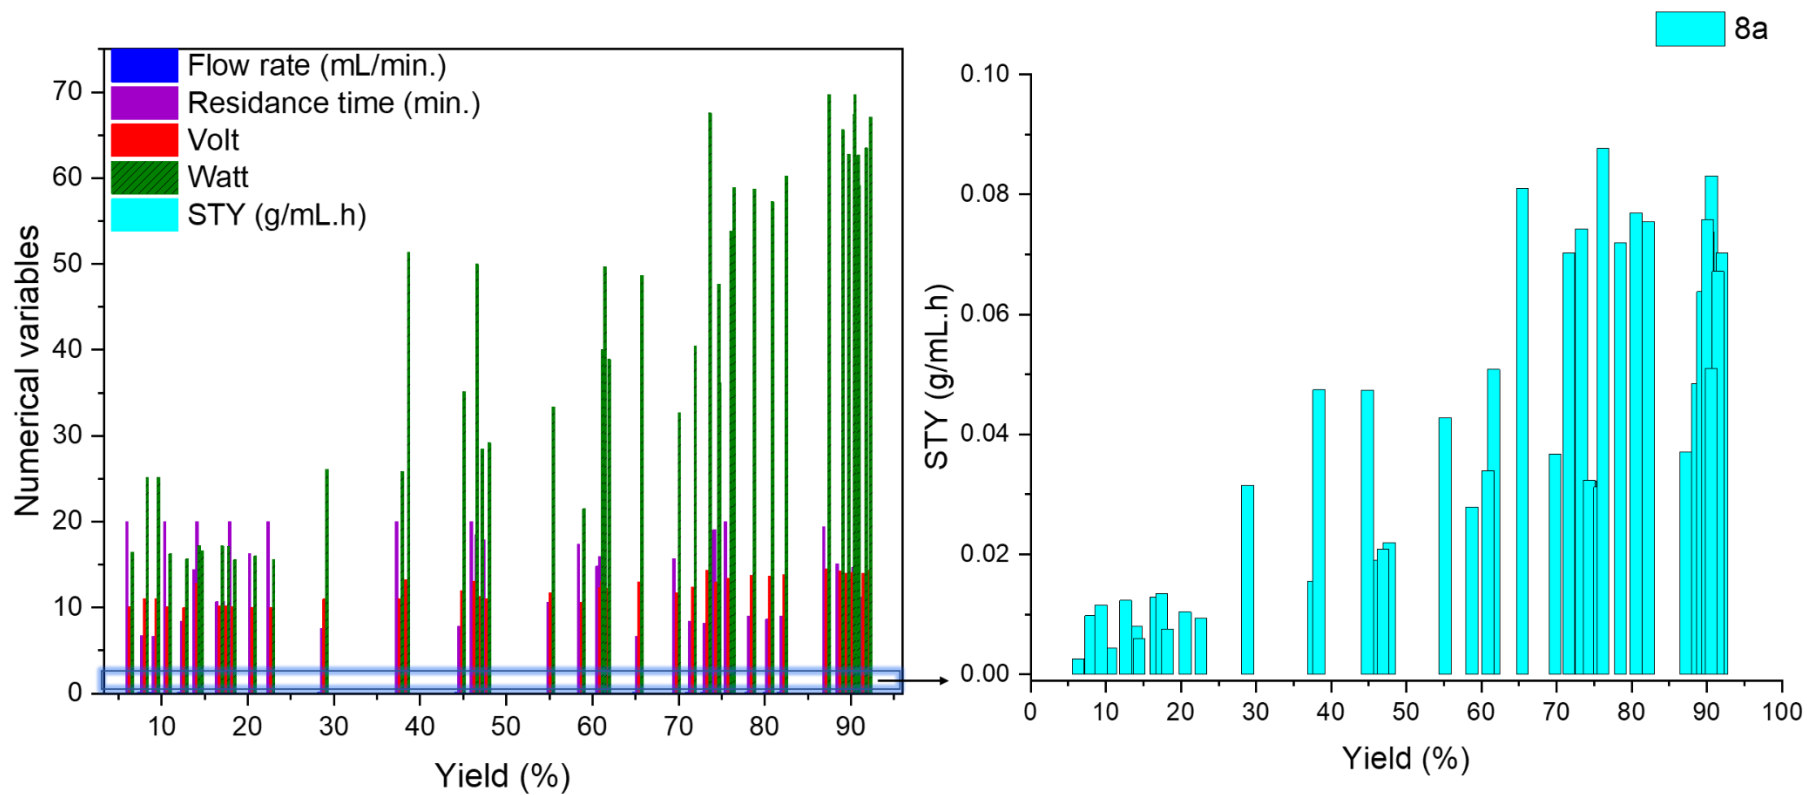

**Figure S29.** AI based system navigated multi-numerical variable complexity and identify the optimal conditions for the photo activated N-H insertion reaction. Compound **2a** (0.1 M in EtOAc); reagent **7a** (0.3 M in EtOAc); 1 mL reactor volume.

### S5.3. General procedure of running AI optimized condition for longer time for synthesis of compound 8a.

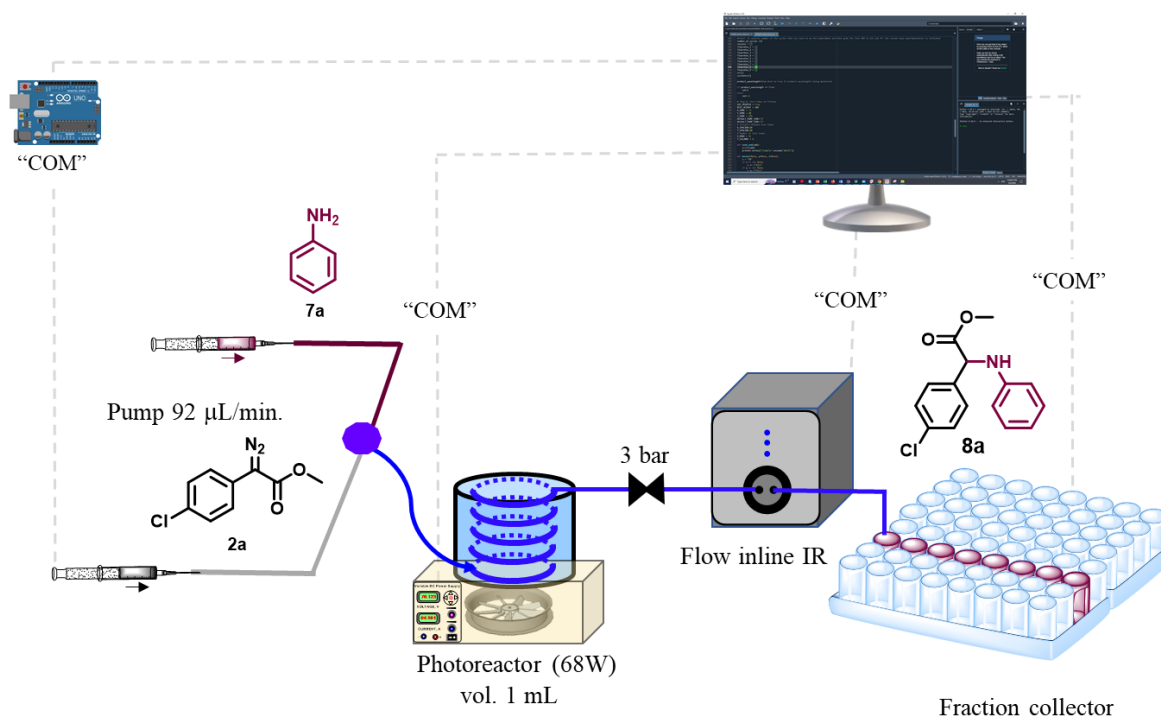

**Figure S30.** Schematic presentation of continuous flow for the synthesis, of compound **8a**.

To prepare the stock solution of compound **2a** (2.20 g, 0.01 mol) was dissolved in ethyl acetate (100 mL) charged in one syringe, another syringe charged with the reagent **7a** (2.9 mL, 0.03 mol) dissolved in ethyl acetate (100 mL). These two syringes connected via pump and out-put is further connected with the T<sub>1</sub>-mixer and both syringes were running with the 46  $\mu\text{L}/\text{min}$ . each flow rate to maintain the stoichiometry and then passed through PFA tubular reactor (id = 1000  $\mu\text{m}$ , l = 1.3 m, vol. = 1 mL) under blue light (68.0 $\pm$ 2 W) exposure. The room temperature of the reactor was controlled by fan attached to the bottom of the photochemical reactor. The out-put of the tubular reactor was connected with spring based back pressure regulator ( $\sim$ 3 bar) to maintain the evaporation. First one hour of the product mixture was discarded and next 5 h of the product mixture [28 mL; **2a** (0.294 g)] was collected in HPLC bottle The organic EtOAc phase was concentrated under reduced pressure and purified through the regular batch process protocols to give the product **8a** (0.35 g in 5 h, 92 %) as a colourless oil. **<sup>1</sup>H NMR (400 MHz,**

**CDCl<sub>3</sub>**)  $\delta$  7.43 – 7.40 (m, 2H), 7.30 – 7.27 (m, 2H), 7.11 – 7.07 (m, 2H), 6.71 – 6.67 (m, 1H), 6.52 – 6.49 (m, 2H), 5.03 (s, 1H), 5.00 (s, 1H), 3.69 (s, 3H). **<sup>13</sup>C NMR (126 MHz, CDCl<sub>3</sub>)**  $\delta$  171.86, 145.67, 136.29, 134.17, 129.33, 129.10, 128.67, 118.37, 113.50, 60.12, 52.98. **IR (v<sub>max</sub>):** 3418.02, 3020.09, 1740.08, 1214.36, 688.27 cm<sup>-1</sup>. **HRMS (ESI):** *m/z* calcd for **C<sub>15</sub>H<sub>15</sub>ClNO<sub>2</sub>** [M+H]<sup>+</sup> 276.0786, found 276.0782. Verified the analytical data with those reported in the literature.<sup>6</sup>

Table S9. Comparative result for the carbene insertion into N-H bonds of amines.

| Entry | Compound 2a                                                                       | Reagent 5a                                                                        | Product 6a                                                                          | Comparative result                                                                                                     |
|-------|-----------------------------------------------------------------------------------|-----------------------------------------------------------------------------------|-------------------------------------------------------------------------------------|------------------------------------------------------------------------------------------------------------------------|
| 1     | 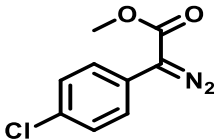 |  |  | 92%, 11 min. (our study)<br>Blue light, chiral spiro phosphamides (2 mol%), 1 h<br>6<br>White light, 80 min., 83%<br>1 |

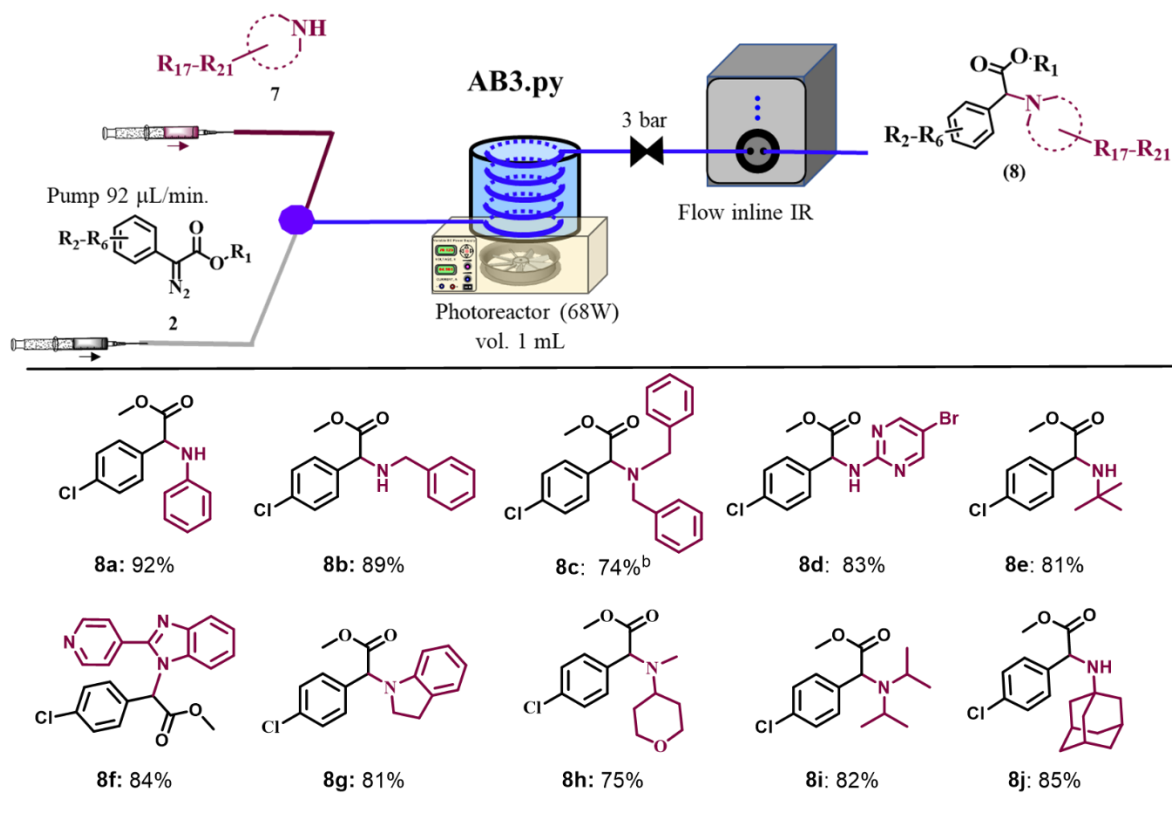

**Figure S31.** Scope of substrate for the photo activated N-H insertion reaction. Compound **2a** (0.1 M in EtOAc); reagent **7a** (0.3 M in EtOAc); 1 mL reactor volume.



**S5.3.1. General procedure for scope of substrate for carbene insertion into the N–H bonds of organic aromatic and aliphatic amines for synthesis of compound 8b–8j.**

**Example 26.** Methyl 2-(benzylamino)-2-(4-chlorophenyl)acetate (**8b**).

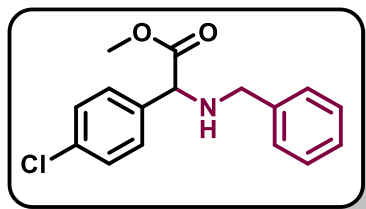

The title compound was synthesized following the general procedure described in section 5.3 and involved corresponding reactant exchange with compound **2a** and compound **7b** (benzyl amine). The crude mixture was concentrated under vacuum, and the product was purified by flash chromatography; to give compound **8b** (0.74 g in 5 h, 89%) as a colorless oil. **<sup>1</sup>H NMR (400 MHz, CDCl<sub>3</sub>)** δ 7.34 – 7.22 (m, 9H), 4.36 (s, 1H), 3.70 (d, *J* = 6.2 Hz, 2H), 3.66 (s, 3H), 2.32 (s, 1H). **<sup>13</sup>C NMR (101 MHz, CDCl<sub>3</sub>)** δ 173.02, 139.28, 136.61, 133.96, 129.05, 128.89, 128.51, 128.31, 127.27, 63.64, 52.36, 51.30. **IR (ν<sub>max</sub>):** 3340.60, 2951.52, 1736.67, 1489.77, 1169.20, 769.20 cm<sup>-1</sup>. **HRMS (ESI):** *m/z* calcd for C<sub>16</sub>H<sub>17</sub>ClNO<sub>2</sub> [M+H]<sup>+</sup> 290.0948, found 290.0967.

**Example 27.** Methyl 2-(4-chlorophenyl)-2-(dibenzylamino)acetate (**8c**).

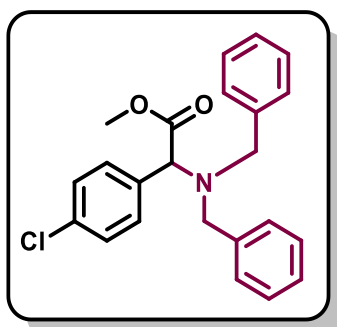

The title compound was synthesized following the general procedure described in section 5.3 and involved corresponding reactant exchange with compounds **2a** and **7c** (dibenzylamine). The crude mixture was concentrated under vacuum, and the product was purified by flash

chromatography; to give compound **8c** (0.79 g in 5 h, 74%) as a colourless liquid. **<sup>1</sup>H NMR (400 MHz, CDCl<sub>3</sub>)** δ 7.34 – 7.21 (m, 14H), 4.57 (s, 1H), 3.77 (s, 3H), 3.73 (d, *J* = 2.9 Hz, 4H). **<sup>13</sup>C NMR (101 MHz, CDCl<sub>3</sub>)** δ 172.28, 139.32, 135.32, 133.87, 130.26, 128.88, 128.69, 128.48, 127.28, 65.31, 54.35, 51.67. **IR (ν<sub>max</sub>):** 3024.08, 1736.91, 1451.25, 1213.67, 688.73 cm<sup>-1</sup>. **HRMS (ESI):** *m/z* calcd for C<sub>23</sub>H<sub>23</sub>ClNO<sub>2</sub> [M+H]<sup>+</sup> 380.1412, found 380.1408.

**Example 28.** Methyl 2-((5-bromopyrimidin-2-yl)amino)-2-(4-chlorophenyl)acetate (**8d**).

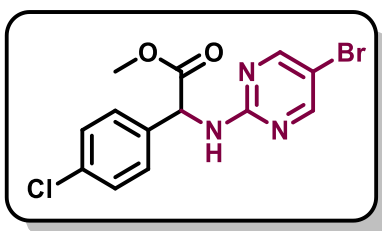

The title compound was synthesized following the general procedure described in section 5.3 and involved corresponding reactant exchange with compound **2a** and compound **7d** (5-bromopyrimidin-2-amine). The crude mixture was concentrated under vacuum, and the product was purified by flash chromatography; to give compound **8d** (0.83 g in 5 h, 83%) as a yellow liquid. **<sup>1</sup>H NMR (500 MHz, CDCl<sub>3</sub>)** δ 8.21 (s, 2H), 7.40 – 7.38 (m, 2H), 7.33 – 7.32 (m, 2H), 6.61 (s, 1H), 5.56 (d, *J* = 6.8 Hz, 1H), 3.74 (s, 3H). **<sup>13</sup>C NMR (101 MHz, CDCl<sub>3</sub>)** δ 171.30, 159.18, 158.36, 135.38, 134.50, 129.11, 128.84, 107.86, 58.01, 52.93. **IR(ν<sub>max</sub>):** 3251.65, 3001.76, 2952.73, 1742.79, 1577.46, 1429.20, 1170.80 cm<sup>-1</sup>. **HRMS (ESI):** *m/z* calcd for C<sub>13</sub>H<sub>12</sub>BrClN<sub>3</sub>O<sub>2</sub> [M+H]<sup>+</sup> 355.9796, found 355.9792.

**Example 29.** Methyl 2-(*tert*-butylamino)-2-(4-chlorophenyl)acetate (**8e**).

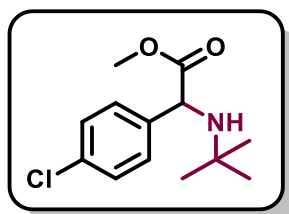

The title compound was synthesized following the general procedure described in section 4.8.2 and involved corresponding reactant exchange with compound **2a** and compound **7e** (*tert*-butyl amine). The crude mixture was concentrated under vacuum, and the product was purified by flash chromatography; to give compound **8e** (0.56 g in 5 h, 81%) as a colorless oil. **<sup>1</sup>H NMR (500 MHz, CDCl<sub>3</sub>)** δ 7.37 – 7.27 (m, 4H), 4.46 (s, 1H), 3.68 (s, 3H), 2.03 (s, 1H), 1.08 (s, 9H). **<sup>13</sup>C NMR (101 MHz, CDCl<sub>3</sub>)** δ 175.11, 139.37, 133.50, 128.76, 59.08, 52.58, 51.36, 29.52. **IR (ν<sub>max</sub>):** 3341.84, 2928.86, 1736.93, 1488.43, 1167.16, 823.38 cm<sup>-1</sup>. **HRMS (ESI):** *m/z* calcd for C<sub>13</sub>H<sub>19</sub>ClNO<sub>2</sub> [M+H]<sup>+</sup> 256.1099, found 256.1103.

**Example 30.** Methyl 2-(4-chlorophenyl)-2-(2-(pyridin-4-yl)-1H-benzo[d]imidazol-1-yl)acetate (**8f**).

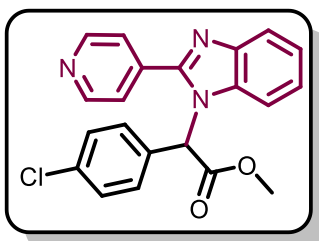

The title compound was synthesized following the general procedure described in section 5.3 and involved corresponding reactant exchange with compound **2a** and compound **7f** (2-(pyridin-4-yl)-1H-benzo[d]imidazole). The crude mixture was concentrated under vacuum, and the product was purified by flash chromatography; to give compound **8f** (0.92 g in 5 h, 84%) as an off white solid and **mp**: 166-168 °C. **<sup>1</sup>H NMR (400 MHz, CDCl<sub>3</sub>)** δ 8.77 (d, *J* = 6.0 Hz, 2H), 7.88 (d, *J* = 8.1 Hz, 1H), 7.56 – 7.55 (m, 2H), 7.37 – 7.33 (m, 3H), 7.25 – 7.23 (m, 1H), 7.15 – 7.09 (m, 3H), 6.37 (s, 1H), 3.76 (s, 3H). **<sup>13</sup>C NMR (101 MHz, CDCl<sub>3</sub>)** δ 168.01, 151.50, 150.58, 143.19, 137.46, 135.06, 134.64, 131.44, 129.23, 128.53, 124.32, 123.55, 123.51, 120.76, 120.51, 112.40, 61.38, 53.44. **IR (ν<sub>max</sub>):** 2958.15, 1747.03, 1411.75, 1212.68, 1004.48 cm<sup>-1</sup>. **HRMS (ESI):** *m/z* calcd for C<sub>21</sub>H<sub>17</sub>ClN<sub>3</sub>O<sub>2</sub> [M+H]<sup>+</sup> 378.1007, found 378.1009.

**Example 31.** Methyl 2-(4-chlorophenyl)-2-(indolin-1-yl)acetate (**8g**).

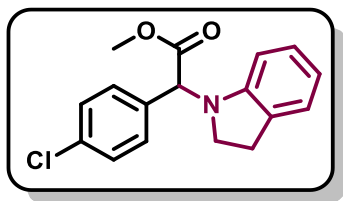

The title compound was synthesized following the general procedure described in section 5.3 and involved corresponding reactant exchange with compound **2a** and compound **7g** (indoline). The crude mixture was concentrated under vacuum, and the product was purified by flash chromatography;  $R_f = 0.5$  (30% ethylacetate/hexane); to give compound **8g** (0.70 g in 5 h, 81%) as a white solid and **mp**: 105-107 °C.  $^1\text{H NMR}$  (400 MHz,  $\text{CDCl}_3$ )  $\delta$  7.39 (s, 4H), 7.13 – 7.06 (m, 2H), 6.76 – 6.72 (m, 1H), 6.47 (d,  $J = 7.9$  Hz, 1H), 5.29 (s, 1H), 3.78 (s, 3H), 3.66 (dd,  $J = 17.9, 8.6$  Hz, 1H), 3.23 – 3.17 (m, 1H), 3.05 – 2.89 (m, 2H).  $^{13}\text{C NMR}$  (101 MHz,  $\text{CDCl}_3$ )  $\delta$  171.30, 150.63, 134.33, 133.76, 130.25, 130.03, 128.92, 127.24, 124.77, 118.64, 106.90, 63.21, 52.15, 49.90, 28.20. **IR** ( $\nu_{\text{max}}$ ): 2954.36, 1714.79, 1213.16, 1013.78, 838.25  $\text{cm}^{-1}$ .  $^1\text{HRMS}$  (ESI):  $m/z$  calcd for  $\text{C}_{17}\text{H}_{17}\text{ClNO}_2$   $[\text{M}+\text{H}]^+$  302.0942, found 302.0970.

**Example 32.** Methyl 2-(4-chlorophenyl)-2-(methyl(tetrahydro-2H-pyran-4-yl)amino)acetate (**8h**).

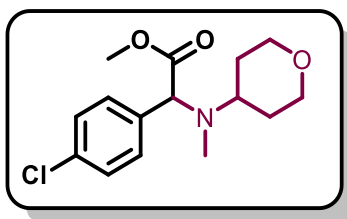

The title compound was synthesized following the general procedure described in section 5.3 and involved corresponding reactant exchange with compound **2a** and compound **7h** (N-methyltetrahydro-2H-pyran-4-amine). The crude mixture was concentrated under vacuum, and the product was purified by flash chromatography; to give compound **8h** (0.62 g in 5 h, 75%) as a colourless liquid.  $^1\text{H NMR}$  (400 MHz,  $\text{CDCl}_3$ )  $\delta$  7.38 – 7.36 (m, 2H), 7.33 – 7.30 (m, 2H), 4.47 (s, 1H), 4.00 – 3.95 (m, 2H), 3.70 (s, 3H), 3.32 – 3.21 (m, 2H), 2.74 – 2.66 (m, 1H), 2.24 (s, 3H), 1.72 – 1.59 (m, 4H).  $^{13}\text{C NMR}$  (101 MHz,  $\text{CDCl}_3$ ) 172.32, 135.51, 133.93,

129.92, 128.70, 68.63, 67.57, 67.36, 56.94, 51.93, 33.42, 29.69, 28.64. **IR** ( $\nu_{\max}$ ): 2952.50, 2846.49, 1738.35, 1489.25, 1206.43, 1011.50, 816.53  $\text{cm}^{-1}$ . **HRMS (ESI)**:  $m/z$  calcd for  $\text{C}_{15}\text{H}_{21}\text{ClNO}_3$   $[\text{M}+\text{H}]^+$  298.1210, found 298.1230.

**Example 33.** Methyl 2-(4-chlorophenyl)-2-(diisopropylamino)acetate (**8i**).

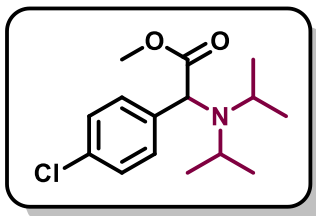

The title compound was synthesized following the general procedure described in section 5.3 and involved corresponding reactant exchange with compounds **2a** and **7i** (diisopropylamine). The crude mixture was concentrated under vacuum, and the product was purified by flash chromatography; to give compound **8i** (0.66 g in 5 h, 82%) as a white solid.  **$^1\text{H NMR}$  (400 MHz,  $\text{CDCl}_3$ )**  $\delta$  7.29 – 7.22 (m, 4H), 4.73 (s, 1H), 3.73 (s, 3H), 3.30 – 3.20 (m, 2H), 1.10 (d,  $J = 6.6$  Hz, 6H), 0.96 (d,  $J = 6.7$  Hz, 6H).  **$^{13}\text{C NMR}$  (126 MHz,  $\text{CDCl}_3$ )**  $\delta$  175.62, 138.16, 133.05, 129.78, 128.33, 61.04, 51.69, 45.95, 23.24, 21.55. **IR** ( $\nu_{\max}$ ): 2963.52, 2871.93, 1740.85, 1459.80, 1140.85, 1015.15, 821.93  $\text{cm}^{-1}$ . **HRMS (ESI)**:  $m/z$  calcd for  $\text{C}_{15}\text{H}_{23}\text{ClNO}_2$   $[\text{M}+\text{H}]^+$  284.1412, found 284.1411.

**Example 34.** Methyl 2-(((3s,5s,7s)-adamantan-1-yl)amino)-2-(4-chlorophenyl)acetate (**8j**).

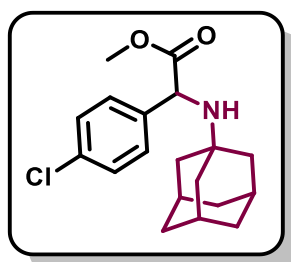

The title compound was synthesized following the general procedure described in section 5.3 and involved corresponding reactant exchange with compound **2a** and compound **7j** (adamantly amine). The crude mixture was concentrated under vacuum, and the product was purified by flash chromatography; to give compound **8j** (0.76 g in 5 h, 85%) as a white solid.

**<sup>1</sup>H NMR (400 MHz, CDCl<sub>3</sub>)** δ 7.37 – 7.26 (m, 4H), 4.57 (s, 1H), 3.67 (s, 3H), 2.04 (d, *J* = 7.0 Hz, 4H), 1.64 – 1.55 (m, 12H). **<sup>13</sup>C NMR (101 MHz, CDCl<sub>3</sub>)** δ 175.05, 139.49, 133.33, 128.68, 128.63, 56.90, 52.45, 51.31, 43.07, 36.51, 29.56. **IR (ν<sub>max</sub>):** 3328.25, 2904.43, 2848.81, 1736.79, 1487.26, 1163.15, 821.61 cm<sup>-1</sup>. **HRMS (ESI):** *m/z* calcd for C<sub>19</sub>H<sub>25</sub>ClNO<sub>2</sub> [M+H]<sup>+</sup> 334.1574, found 334.1592.

**S6 Case study-4: Carbene insertion (C-C bond formation, cyclopropanation) single objective multi-variant auto-optimization.**

**5.6.1 Background collection**

**Sample Preparation:** We prepare 0.5 M stock solution of compound **2a** in DCE, 0.5 M stock solution of reagent **9a** in DCE and 0.5 M stock solution of product **10a** in DCE. The three of the solution taken in three different syringes. To conduct our analysis, we utilized an In-line FTIR system. The experimental protocol involved the initial introduction of the solvent, DCE, for a duration of 10 min. using a syringe pump, during which data was recorded. Subsequently, a previously prepared stock solution of compound **2a** was similarly introduced into the In-line FTIR for 10 min. This process was repeated for the reaction product **10a** and reagent **9a**, each pumped for 10 min. Upon collecting all relevant data, we identified the signature peak present in the product. Using this peak as a reference, we employed a Bayesian optimizer to fine-tune and optimize the reaction conditions for improved results.

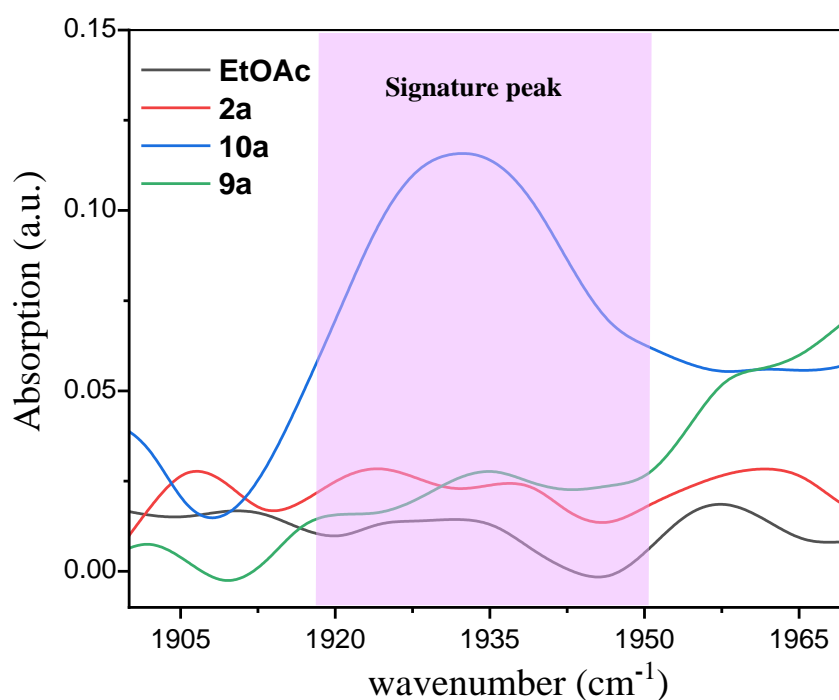

**Figure S32.** In-line IR background analysis of DCE, 0.5 M stock solution of **2a**, **9a**, and **10a** in DCE.

The distinctive shifting peak associated with product (**10a**) aligning within the range of 1910 to 1950  $\text{cm}^{-1}$  was observed. This specific peak, falling within this range, is designated as the signature peak for our analysis. During the optimization of the reaction through Bayesian methods, this signature peak serves as a pivotal reference point. We utilize it to calculate the area under the curve in the In-line FT-IR spectra, providing a quantitative measure of the area in the forthcoming reaction mixture.

### **S6.2. General procedure for the auto-optimized synthesis of compound 10a.**

Initial steps involved the preparation of stock solutions for compound **2a** (0.1 M in DCE) and reagent **9a** (0.2 M in DCE), each filled into separate syringes and connected to a syringe pump. The solutions were then directed through a PFA tubular reactor (inner diameter = 1 mm, length = 5.0 m, volume = 4 mL) surrounded by a cylindrical-shaped blue LED light source. Once the solution setup was complete, input ranges for variable flow rates, voltages, and current were specified in the Python code designed for the reaction. The Bayesian optimizer systematically explored these varying reaction conditions, aiming to achieve maximum yield. The optimization process involved running 50-60 experiments and the results were tabulated in the optimization table (Table S10).



### S6.2.1. Python code for optimizing condition for C-C bond formation (cyclopropanation).

```
ab4.py
1 from os import listdir
2 from os.path import isfile, join
3 import serial
4
5 import numpy as np
6 import pandas as pd
7 import time
8 from scipy.integrate import trapz
9
10 #step1: be sure to the address of the files that the ftir data is exported is matching to line 11 (mypath)
11 mypath = "C:\\Users\\Admin\\Desktop\\ruchi\\Exp 2023-10-31 18-27"
12 onlyfiles = [f for f in listdir(mypath) if isfile(join(mypath, f))]
13
14
15 #step2: make sure that pump and the potentiostat is correctly addressed in the Line 16 and 17
16 pump_1 = serial.Serial("COM4",9600) #Harvard Pump
17 port = serial.Serial("COM1",115200)
18 printer = serial.Serial("COM6", 115200, timeout=1)
19
20
21
22 #step 3: grab the lines from 22 to 90 and press f9
23 def area_under(data,start,end):
24     x = np.flip(data.iloc[start:end,0].to_numpy())
25     y = np.flip(data.iloc[start:end,1].to_numpy())
26     area = trapz(y,x)
27     return np.abs(area)
28
29 def file_namer(num):
30     str1 = str(num)
31     length = int(len((str1)))
32     empt = ''
33     for i in range(5-length):
34         empt = empt+'0'
35
36     return empt+str1
37
38
39 def ftir_extract(filename,init,end):
40     filename = filename
41
42     temp_df = pd.read_csv(filename)
43     # nump_df = temp_df.to_numpy()
44     area = area_under(temp_df, init, end)
45     # max_peak = np.max(nump_df[90:120,1])
46     print(area)
47
```

```

48     return area
49
50
51 def function(flowrate_1,v,i):
52     #set the pumps with the flowrate as the desired flowrate for the function
53
54     fr_1 = flowrate_1 #ml/min
55     pump_1.write(('irate '+str(fr_1)+' ml/min\r\n').encode())
56
57     time.sleep(0.1)
58
59     #set the com port for potentiostat and set the voltage and current
60     vol = v
61     curr = i
62     port.write(('VOLT '+str(vol)+'\r\n').encode()) #to change the voltge we need to use "VOLT 1" command
63     port.write(('CURR '+str(curr)+'\r\n').encode()) #to change the current we need to use "CURR 1" command
64
65
66
67     #pumps run
68     pump_1.write((b'irun\r\n'))
69     time.sleep(0.1)
70     time.sleep(4800)
71
72 def function2(flowrate_1,v,i):
73     time.sleep(180)
74
75     files = [f for f in listdir(mypath) if isfile(join(mypath, f))]
76
77     val = 0
78
79     #change wavelenghts as per product here.
80     f_row=9 #first row of range for wavelength as per IR CSV
81     l_row=19 #Last row of range for wavelength as per IR CSV
82
83     val += ftir_extract(files[-1],f_row,l_row)
84     val+=ftir_extract(files[-2],f_row,l_row)
85     val+=ftir_extract(files[-3],f_row,l_row)
86
87     avg_val = val/3
88
89     return avg_val
90
91
92 #step 4:grab the line 93 and f9
93 from skopt.optimizer import Optimizer
94

```

```

95
96 #step5:in line 96 we have to define the range that (flowrate,voltage,current) (from,to) and after (anytime) applying changes you need to grab the line 96 and f:
97 #flowrates are in ml/min, voltage in V, Current in Ampere
98 bounds = [(0.05,0.15),(10,14.5),(4.9,5.0)]
99
100
101 #step 6: grab the line 100 and f9
102 opter =Optimizer(bounds,base_estimator='gp',n_initial_points=3,acq_func="EI",random_state=np.random.randint(3326))
103
104
105 #step7: to selecte number of the cycles that you have to do the experiment and then grab the line 104 to 121 and f9: the closed loop experimentation is initiate
106 number_of_cycles = 22
107 results = []
108 flowrates_1 = []
109 vs = []
110 currents = []
111
112 product_wavelength=True #set to true if product wavelengths being monitored
113
114 if product_wavelength == True:
115     val=1
116 else:
117     val=-1
118
119
120 # Step 8: Test Tubes on Printer
121 USE_PRINTER = True
122 REST_HEIGHT = 200
123 X_HOME = -5
124 Y_HOME = 20
125 Z_HOME = 175
126 DEFAULT_PUMP_TIME="1"
127 # Distance between test tubes
128 X_SPACING=20
129 Y_SPACING=20
130 # Number of test tubes
131 X_ROWS = 11
132 Y_COLUMNS = 4
133
134 def send_cmd(cmd):
135     print(cmd)
136     printer.write(f"{cmd}\n".encode("ASCII"))
137
138 def move(x=None, y=None, z=None):

```

```

139 s = "G0"
140 if x is not None:
141     s += f"X{x}"
142 if y is not None:
143     s += f"Y{y}"
144 if z is not None:
145     s += f"Z{z}"
146
147 s+= "F5000"
148 send_cmd(s)
149
150 def printer_positions():
151     for j in range(Y_COLUMNS):
152         for i in range(X_ROWS):
153             if j%2==1:
154                 yield (X_HOME + (X_ROWS - 1 - i) * X_SPACING, Y_HOME + j * Y_SPACING, Z_HOME)
155             else:
156                 yield (X_HOME + i * X_SPACING, Y_HOME + j * Y_SPACING, Z_HOME)
157
158 # Run this.
159 tube_location = list(printer_positions())
160
161
162 for i in range(number_of_cycles):
163     move(*tube_location[2*i])
164     asked = opter.ask()
165     function(asked[0],asked[1],asked[2])
166     move(*tube_location[2*i+1])
167     told = function2(asked[0],asked[1],asked[2])
168
169     print(f"area under the curve in the round {i:.2f} = {told: .2f}")
170     opter.tell(asked,-told*val)
171     results.append(told)
172     flowrates_1.append(asked[0])
173     vs.append(asked[1])
174     currents.append(asked[2])
175
176     dict1 = {"flowrate_1":flowrates_1,"voltages":vs, "currents":currents,"area-results":results}
177     df2 = pd.DataFrame(dict1)
178     df2.to_csv("output round "+str(i)+".csv")
179
180
181
182 pump_1.write(b'stop\r\n')
183
184
185

```

**Table S10.** Auto-optimization table of C-C bond formation (cyclopropanation).

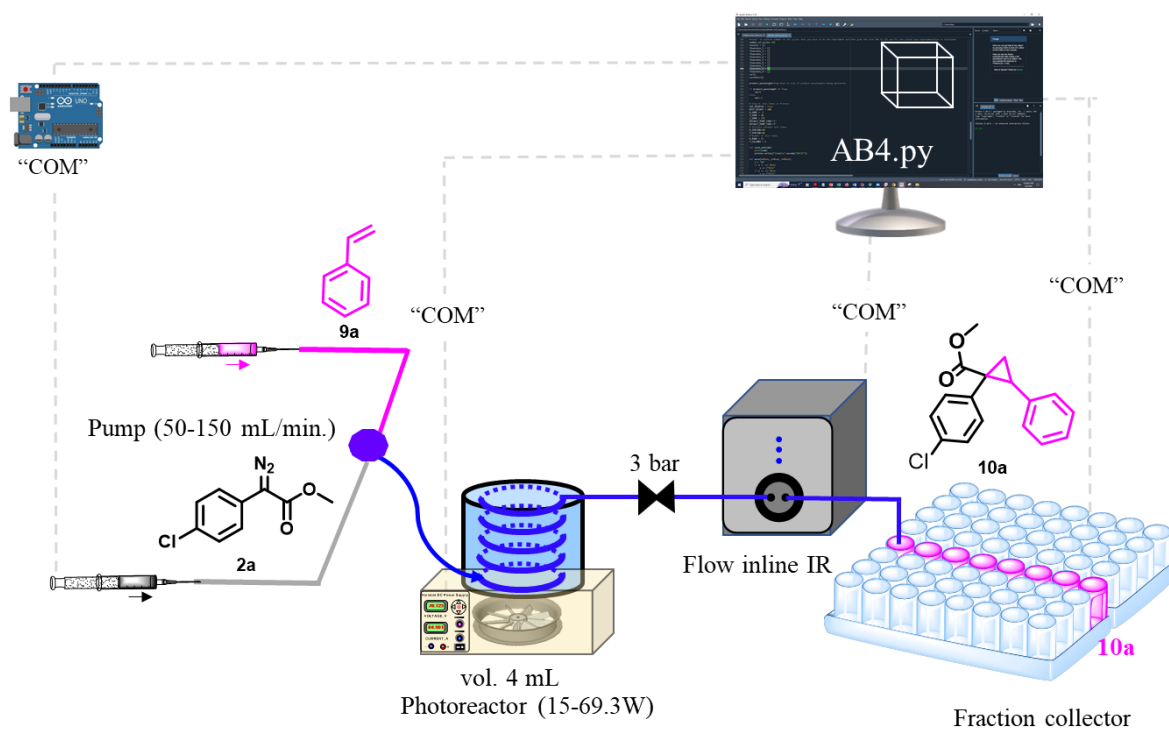

| No. of experiments | Flow rate<br>mL/min. | Voltage<br>(V) | Light intensity<br>(W) | area-<br>results | Yield<br>(%) | Space time<br>yield<br>(g mL <sup>-1</sup> h <sup>-1</sup> ) |
|--------------------|----------------------|----------------|------------------------|------------------|--------------|--------------------------------------------------------------|
| 1                  | 0.05238              | 11.3274        | 27.907                 | 0.221759         | 15.04351243  | 0.001690215                                                  |
| 2                  | 0.11695              | 12.0946        | 36.33                  | 0.883698         | 59.94760912  | 0.015038322                                                  |
| 3                  | 0.0759               | 14.4634        | 67.166                 | 0.965877         | 65.52240341  | 0.010667408                                                  |
| 4                  | 0.13854              | 14             | 60.298                 | 1.178701         | 79.95979035  | 0.023761515                                                  |
| 5                  | 0.05488              | 12.406         | 40.357                 | 0.586033         | 39.75484522  | 0.004679845                                                  |
| 6                  | 0.10281              | 14.484         | 67.22                  | 1.280536         | 86.8679929   | 0.019156777                                                  |
| 7                  | 0.09679              | 14.0054        | 60.698                 | 1.104894         | 74.9529292   | 0.015561319                                                  |
| 8                  | 0.05326              | 14.1323        | 62.576                 | 0.860929         | 58.40302362  | 0.006672119                                                  |
| 9                  | 0.10344              | 14.0963        | 62.093                 | 1.268002         | 86.01772127  | 0.019085509                                                  |
| 10                 | 0.06814              | 14.4914        | 67.943                 | 1.050196         | 71.24236934  | 0.010412806                                                  |
| 11                 | 0.09225              | 14.4998        | 67.938                 | 1.119739         | 75.95997262  | 0.015030675                                                  |
| 12                 | 0.05962              | 14.5           | 67.889                 | 1.076398         | 73.01983999  | 0.009338135                                                  |
| 13                 | 0.1326               | 14.2594        | 64.379                 | 1.344057         | 91.17708048  | 0.025933223                                                  |
| 14                 | 0.09069              | 10.0003        | 15.612                 | 0.104695         | 7.102216975  | 0.001381595                                                  |

|    |         |         |        |          |             |             |
|----|---------|---------|--------|----------|-------------|-------------|
| 15 | 0.08657 | 14.5    | 64.141 | 0.86797  | 58.88066544 | 0.010933707 |
| 16 | 0.09243 | 12.5787 | 42.061 | 0.566808 | 38.45067481 | 0.007623321 |
| 17 | 0.06643 | 14.5    | 58.947 | 0.863185 | 58.55606437 | 0.008343791 |
| 18 | 0.14817 | 14.0122 | 59.401 | 0.97105  | 65.87332531 | 0.020936167 |
| 19 | 0.05161 | 14.0002 | 60.993 | 0.980286 | 66.49986981 | 0.007361765 |
| 20 | 0.07201 | 14.0001 | 60.965 | 0.938318 | 63.65287767 | 0.009831916 |
| 21 | 0.14721 | 14.4998 | 60.856 | 1.198318 | 81.29055295 | 0.025668748 |
| 22 | 0.1287  | 13.7505 | 57.251 | 1.108318 | 75.18520381 | 0.020755574 |
| 23 | 0.14672 | 14.4002 | 62.576 | 1.206441 | 81.84159463 | 0.025756728 |
| 24 | 0.11723 | 14.5    | 68.44  | 1.244494 | 84.42300408 | 0.021228869 |
| 25 | 0.06946 | 12.406  | 40.357 | 0.32261  | 21.88496316 | 0.003260678 |
| 26 | 0.15    | 10      | 15.58  | 0.069309 | 4.701729369 | 0.001512781 |
| 27 | 0.05    | 10      | 15.58  | 0.294156 | 19.95472311 | 0.002140144 |
| 28 | 0.05058 | 14.1178 | 62.919 | 0.412608 | 27.99017662 | 0.003036769 |
| 29 | 0.128   | 14.5    | 68.353 | 1.37646  | 93.37520968 | 0.025637098 |
| 30 | 0.09281 | 14.5    | 68.251 | 1.167093 | 79.17233598 | 0.015761427 |
| 31 | 0.05643 | 14.5    | 68.179 | 0.679223 | 46.07659507 | 0.005577219 |
| 32 | 0.05563 | 10.002  | 15.602 | 0.132377 | 8.980086695 | 0.001071561 |
| 33 | 0.14537 | 10.0003 | 15.612 | 0.289655 | 19.64938782 | 0.006127046 |
| 34 | 0.14994 | 13.0001 | 47.886 | 0.798213 | 54.14854499 | 0.017415325 |
| 35 | 0.14993 | 10.0356 | 15.895 | 0.277093 | 18.79721676 | 0.006045182 |
| 36 | 0.15    | 14.5    | 67.947 | 0.979234 | 66.42850506 | 0.021373372 |
| 37 | 0.14897 | 10.7891 | 22.869 | 0.293017 | 19.87745653 | 0.006351655 |
| 38 | 0.14945 | 11.2435 | 27.424 | 0.330208 | 22.4003903  | 0.007180899 |
| 39 | 0.05023 | 10.7667 | 22.585 | 0.504851 | 34.24768463 | 0.00368996  |
| 40 | 0.09691 | 13.0001 | 47.886 | 0.921254 | 62.49530347 | 0.012991021 |
| 41 | 0.05134 | 12.3099 | 39.229 | 0.813469 | 55.18346951 | 0.006077041 |
| 42 | 0.14539 | 14.1487 | 62.167 | 1.265278 | 85.83293271 | 0.026767991 |
| 43 | 0.05    | 14.5    | 67.831 | 0.983382 | 66.70989382 | 0.007154636 |
| 44 | 0.05    | 13.1051 | 41.708 | 0.871355 | 59.1102944  | 0.006339579 |
| 45 | 0.05    | 14.5    | 67.802 | 1.223662 | 83.00981927 | 0.008902803 |
| 46 | 0.11106 | 14.5    | 67.744 | 1.27144  | 86.25094561 | 0.020547019 |
| 47 | 0.15    | 12.5787 | 42.061 | 0.927784 | 62.93828047 | 0.020250392 |

|           |               |             |               |                 |                    |                   |
|-----------|---------------|-------------|---------------|-----------------|--------------------|-------------------|
| 48        | 0.15          | 13.1051     | 48.708        | 0.957731        | 64.96980148        | 0.020904034       |
| <b>49</b> | <b>0.1251</b> | <b>14.5</b> | <b>69.301</b> | <b>1.406376</b> | <b>95.40462773</b> | <b>0.02560083</b> |
| 50        | 0.15          | 13.3803     | 52.251        | 1.129606        | 76.6293224         | 0.024655484       |
| 51        | 0.15          | 11.126      | 26.133        | 0.46734         | 31.70304294        | 0.010200454       |
| 52        | 0.15          | 14.5        | 67.947        | 1.313304        | 89.09088268        | 0.028664992       |
| 53        | 0.13          | 13.3538     | 52.209        | 1.04556         | 70.92787602        | 0.019778238       |
| 54        | 0.06674       | 14.4746     | 67.719        | 1.186773        | 80.50737233        | 0.011525218       |
| 55        | 0.15          | 12.6835     | 43.512        | 0.99783         | 67.69000587        | 0.021779259       |
| 56        | 0.15          | 13.3591     | 55.044        | 1.033796        | 70.12983905        | 0.022564276       |
| 57        | 0.14801       | 10.0012     | 15.5          | 0.037879        | 2.569605777        | 0.000815802       |
| 58        | 0.09802       | 12.9662     | 46.924        | 0.988208        | 67.03727621        | 0.014094782       |
| 59        | 0.14937       | 14.4998     | 60.391        | 1.096345        | 74.37298887        | 0.023829005       |
| 60        | 0.14409       | 14.1585     | 61.436        | 1.12544         | 76.34671257        | 0.023596711       |

**Reaction condition:** compound **2a** (0.1 M in DCE); reagent **9a** (0.2 M in DCE); 4 mL reactor volume.

**Graph:**

We have plotted 3D graph of optimization table S10, we have taken flow rate on X-axis, blue light intensity (watt) on Y-axis and product yield on Z axis.

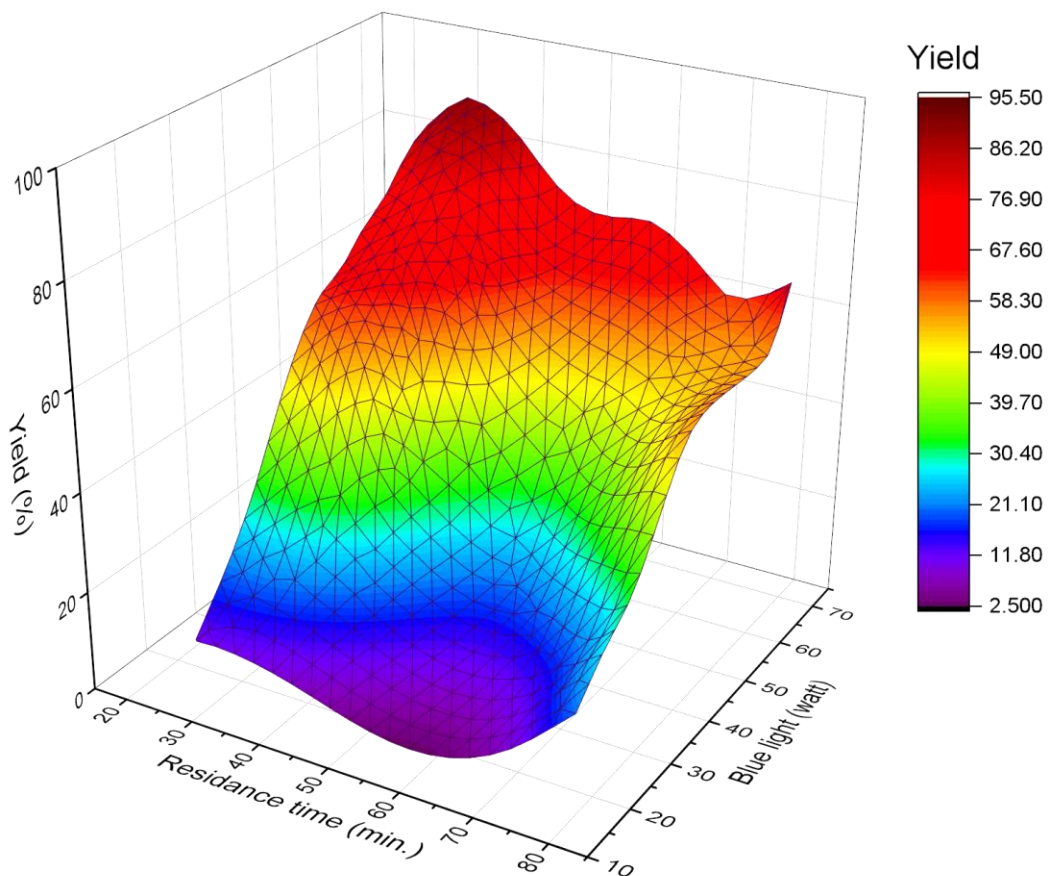

**Figure S33.** AI based system to auto-optimize and navigate this complexity and identify the optimal conditions for the photo activated cyclopropanation reaction. Compound **2a** (0.1 M in DCE); reagent **9a** (0.2 M in DCE); 4 mL reactor volume.



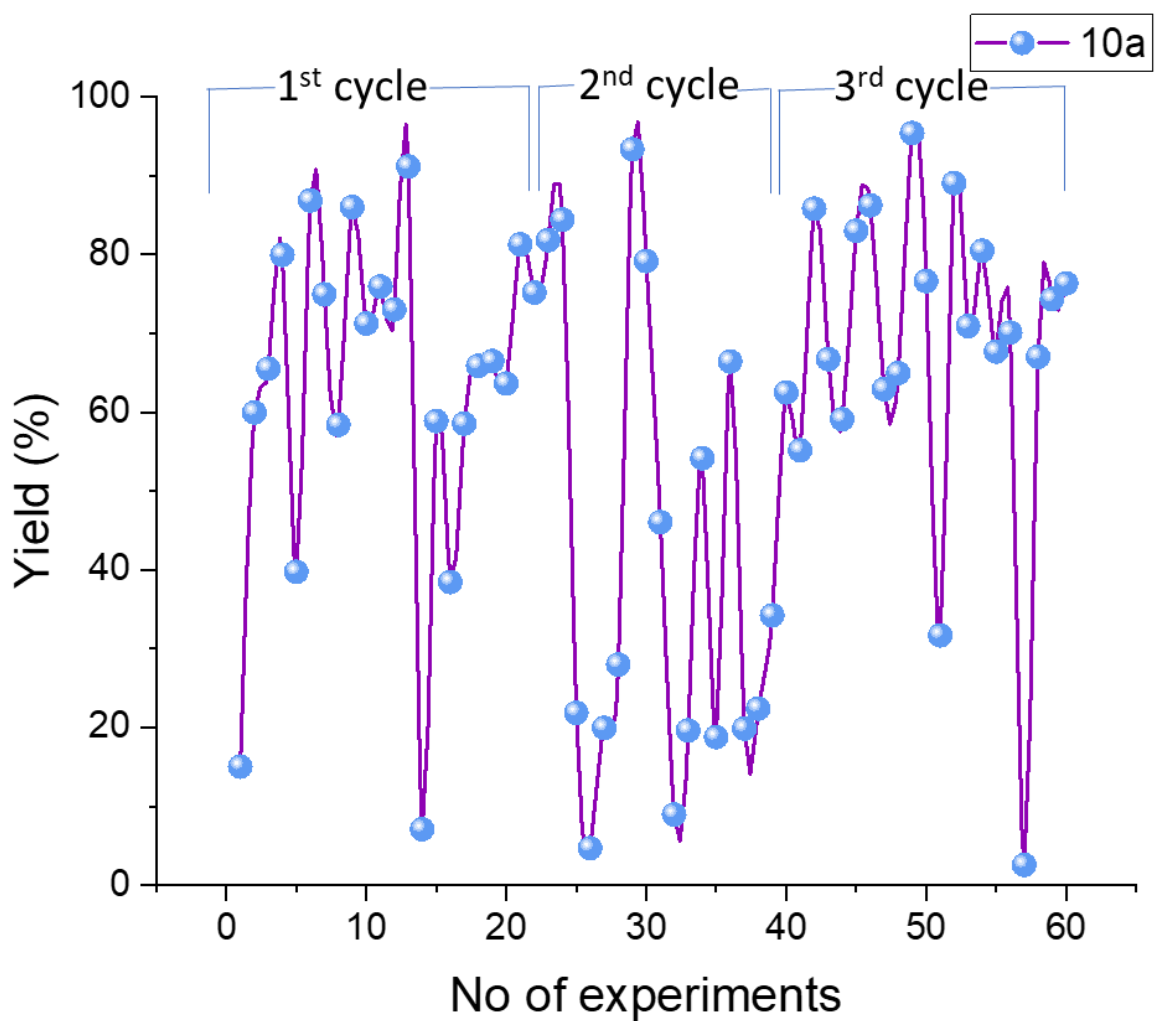

**Figure S34.** 2D graph between no of experiments performed versus yield (%) for the AI based auto-optimization of photo activated cyclopropanation reaction. Compound **2a** (0.1 M in DCE); reagent **9a** (0.2 M in DCE); 4 mL reactor volume.

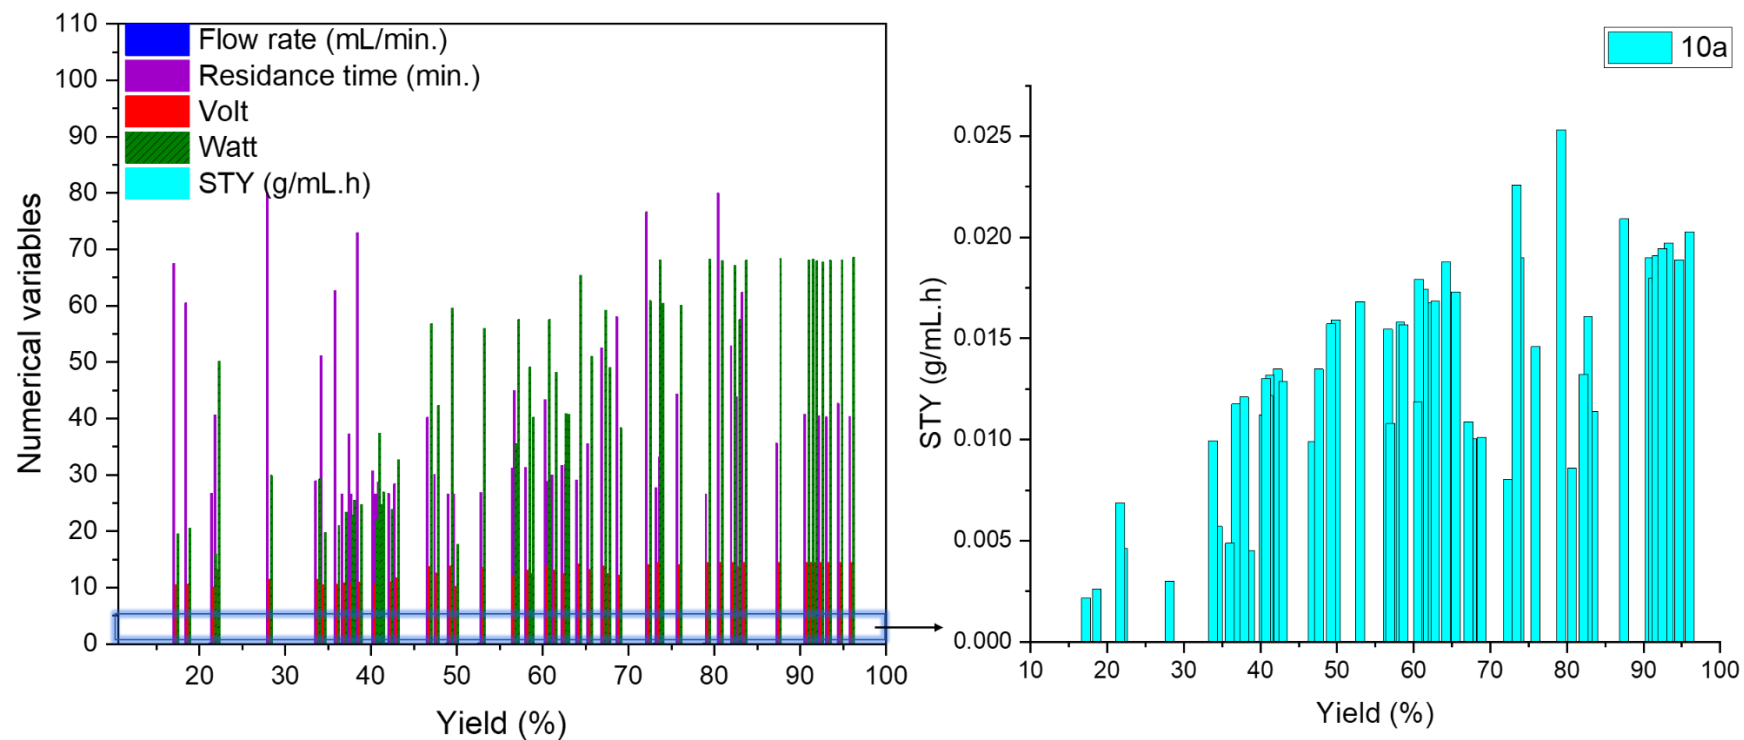

**Figure S35.** AI based system navigated multi-numerical variable complexity and identify the optimal condition for the photo activated cyclopropanation reaction. Compound **2a** (0.1 M in DCE); reagent **9a** (0.2 M in DCE); 4 mL reactor volume.

**S6.3.** General procedure for AI optimized carbene insertion into the double bonds of aromatic alkenes for longer run to synthesis compound **10a**.

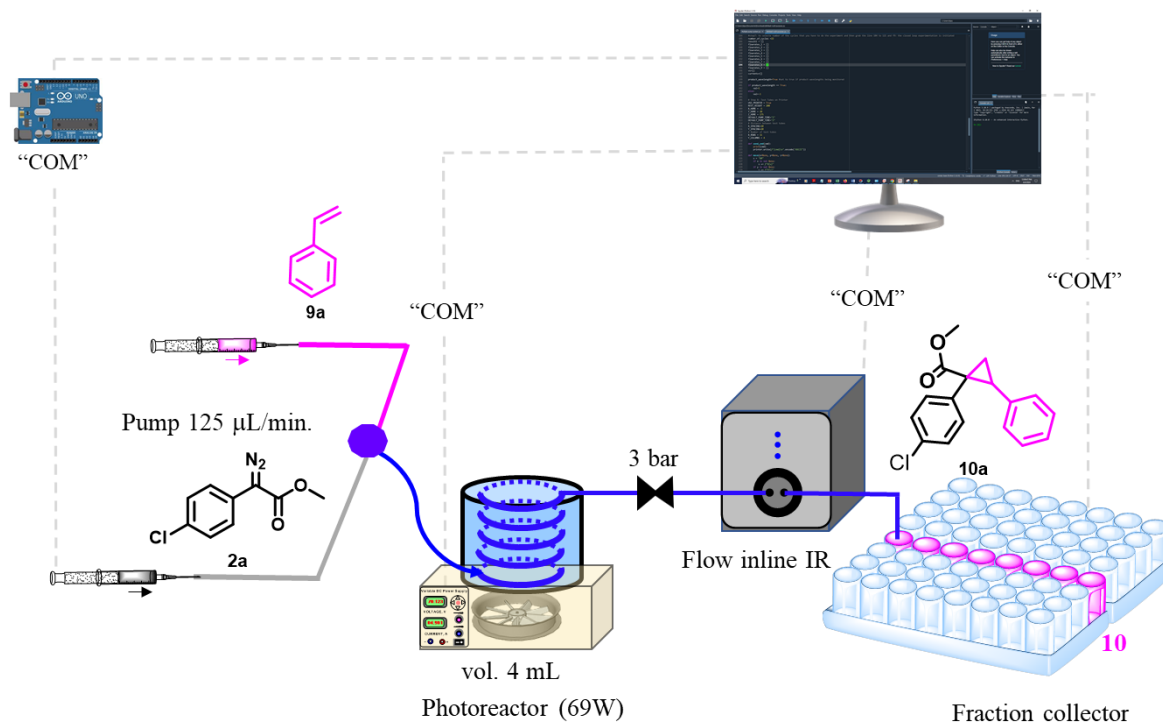

**Figure S36.** Schematic presentation of continuous flow for the synthesis, of compound **9a**.

To prepare the stock solution of compound **2a** (2.20 g, 0.01 mol) was dissolved in ethyl acetate (100 mL) charged in one syringe, another syringe charged with the reagent **9a** (2.4 mL, 0.02 mol) dissolved in ethyl acetate (100 mL). These two syringes connected via pump and out-put is further connected with the T-mixer and both syringes were running with the 125 µL/min. flow rate to maintain the stoichiometry and then passed through PFA tubular reactor (id = 1000 µm, l = 5 m, vol. = 4 mL) under blue light (69W) exposure. The room temperature of the reactor was controlled by fan attached to the bottom of the photochemical reactor. The out-put of the tubular reactor was connected with spring based back pressure regulator (~3 bar) to maintain the evaporation. First one hour of the product mixture was discarded and next 5 h of the product mixture [37.5 mL; **2a** (0.393 g)] was collected in HPLC bottle. The organic EtOAc phase was concentrated under reduced pressure to give the product **10a** (0.507 g in 5 h, 95%) as a colorless oil.  $^1\text{H NMR}$  (400 MHz,  $\text{CDCl}_3$ )  $\delta$  7.12 – 7.07 (m, 5H), 6.97 – 6.93 (m, 2H), 6.79 – 6.77 (m,

2H), 3.67 (s, 3H), 3.11 (dd,  $J = 9.3, 7.4$  Hz, 1H), 2.14 (dd,  $J = 9.3, 5.0$  Hz, 1H), 1.84 (dd,  $J = 7.3, 5.0$  Hz, 1H).  **$^{13}\text{C}$  NMR (101 MHz,  $\text{CDCl}_3$ )**  $\delta$  173.99, 135.99, 133.56, 133.33, 133.07, 131.63, 129.46, 128.15, 128.07, 128.02, 126.68, 52.80, 36.82, 33.31, 20.47. **IR ( $\nu_{\text{max}}$ ):** 3024.29, 2953.82, 1716.75, 1494.38, 1213.56, 825.68  $\text{cm}^{-1}$ . **HRMS (ESI):**  $m/z$  calcd for  $\text{C}_{17}\text{H}_{16}\text{ClO}_2$   $[\text{M}+\text{H}]^+$  286.0833, found 286.0842. Verified the analytical data with those reported in the literature.<sup>7</sup>

### Space time yield in previous reported batch process<sup>8</sup>

Productivity = 100.4 mg in 12 h

$$\text{Productivity (per h)} := \frac{0.100}{12} = 0.008 \text{ g/h}$$

$$\text{Space time yield} := \frac{\text{productivity}}{\text{volume of reactor}}$$

$$= \frac{0.008}{3} = 0.0026 \text{ g mL}^{-1} \text{ h}^{-1}$$

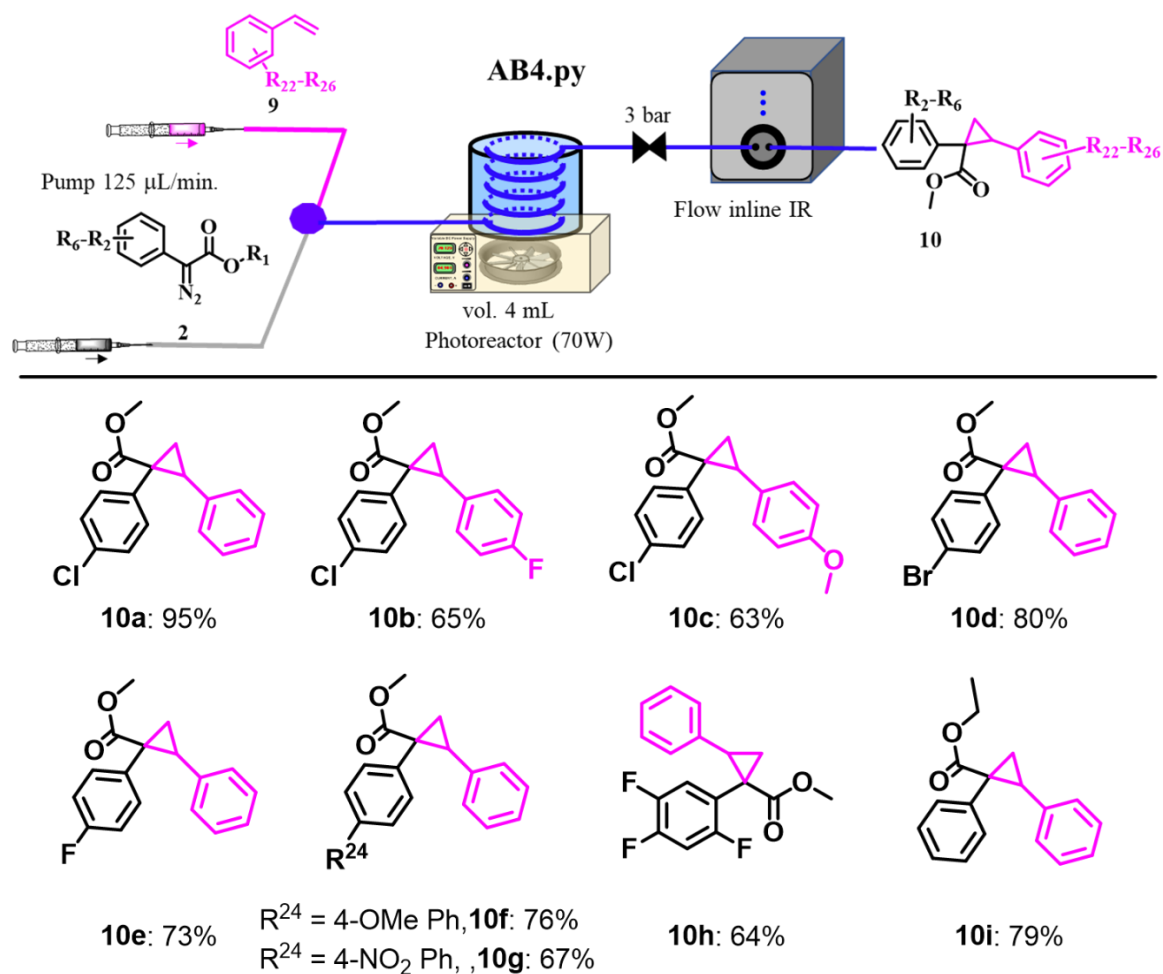

**Figure S37.** Scope of substrate for the photo activated cyclopropanation reaction. Compound **2a** (0.1 M in DCE); reagent **9a** (0.2 M in DCE); 4 mL reactor volume.

### S6.3.1. General procedure for scope of substrate for synthesis of compound **10b–10i**.

**Example 36.** Methyl 1-(4-chlorophenyl)-2-(4-fluorophenyl)cyclopropane-1-carboxylate (**10b**).

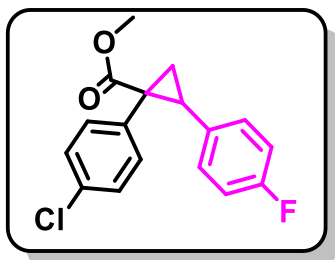

The title compound was synthesised following the general procedure described in section 6.3, and involve corresponding reactant exchange with compound **2a** and compound **9b** (1-fluoro-

4-vinylbenzene). The crude mixture was concentrated under vacuum and the product was purified by flash chromatography;  $R_f = 0.5$  (5% ethylacetate/hexane); to give compound **10b** (0.37 g in 5 h, 65%) as a colorless oil.  $^1\text{H NMR}$  (400 MHz,  $\text{CDCl}_3$ )  $\delta$  7.13–7.10 (m, 2H), 6.96–6.93 (m, 2H), 6.81–6.71 (m, 4H), 3.66 (s, 3H), 3.09 (dd,  $J = 9.3, 7.3$  Hz, 1H), 2.13 (dd,  $J = 9.4, 5.1$  Hz, 1H), 1.78 (dd,  $J = 7.3, 5.1$  Hz, 1H).  $^{13}\text{C NMR}$  (101 MHz,  $\text{CDCl}_3$ )  $\delta$  173.83, 162.92, 160.48, 133.34, 133.28, 133.20, 131.75, 129.57, 129.49, 128.17, 115.07, 114.85, 52.81, 36.65, 32.50, 20.55.  $^{19}\text{F NMR}$  (471 MHz,  $\text{CDCl}_3$ )  $\delta$  -114.38 (s). IR ( $\nu_{\text{max}}$ ): 3021.76, 1715.56, 1437.27, 1214.76, 836.50  $\text{cm}^{-1}$ . HRMS (ESI):  $m/z$  calcd for  $\text{C}_{17}\text{H}_{15}\text{ClFO}_2$   $[\text{M}+\text{H}]^+$  305.0739, found 305.0748.

**Example 37.** Methyl 1-(4-chlorophenyl)-2-(4-methoxyphenyl)cyclopropane-1-carboxylate (**10c**).

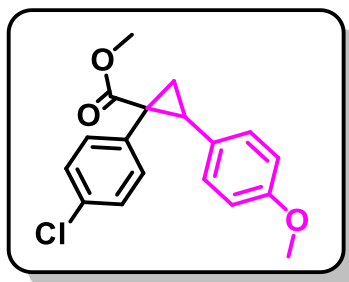

The title compound was synthesised following the general procedure described in section 6.3, and involve corresponding reactant exchange with compound **2a** and compound **9c** (1-methoxy-4-vinylbenzene). The crude mixture was concentrated under vacuum and the product was purified by flash chromatography;  $R_f = 0.5$  (5% ethylacetate/hexane); to give compound **10c** (0.375 g in 5 h, 63%) as a colorless oil.  $^1\text{H NMR}$  (400 MHz,  $\text{CDCl}_3$ )  $\delta$  7.11–7.08 (m, 2H), 6.97–6.94 (m, 2H), 6.70–6.68 (m, 2H), 6.64–6.61 (m, 2H), 3.68 (s, 3H), 3.64 (s, 3H), 3.08–3.04 (m, 1H), 2.13–2.10 (m, 1H), 1.78–1.75 (m, 1H).  $^{13}\text{C NMR}$  (101 MHz,  $\text{CDCl}_3$ )  $\delta$  190.83, 173.95, 158.31, 133.69, 133.32, 132.89, 132.03, 131.69, 130.08, 129.07, 128.51, 127.99, 127.84, 114.37, 113.42, 55.22, 55.13, 52.63, 36.42, 32.81, 20.43. IR ( $\nu_{\text{max}}$ ): 3020.53,

1714.16, 1437.97, 1214.91, 833.50  $\text{cm}^{-1}$ . **HRMS (ESI):**  $m/z$  calcd for  $\text{C}_{18}\text{H}_{18}\text{ClO}_3$   $[\text{M}+\text{H}]^+$  317.0939, found 317.0942.

**Example 38.** Methyl 1-(4-bromophenyl)-2-phenylcyclopropane-1-carboxylate (**10d**).

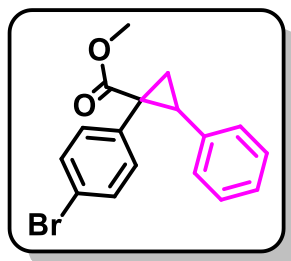

The title compound was synthesised following the general procedure described in section 6.3, and involve corresponding reactant exchange with compound **2b** and compound **9a** (styrene). The crude mixture was concentrated under vacuum and the product was purified by flash chromatography;  $R_f$  = 0.5 (5% ethylacetate/hexane); to give compound **10d** (0.494 g in 5 h, 80%) as a colorless oil.  **$^1\text{H NMR}$  (400 MHz,  $\text{CDCl}_3$ )**  $\delta$  7.23 (d,  $J$  = 8.4 Hz, 2H), 7.08 – 7.05 (m, 3H), 6.88 (d,  $J$  = 8.4 Hz, 2H), 6.77 – 6.75 (m, 2H), 3.63 (s, 3H), 3.10 (t,  $J$  = 8.3 Hz, 1H), 2.12 (dd,  $J$  = 9.3, 5.0 Hz, 1H), 1.82 (dd,  $J$  = 7.2, 5.1 Hz, 1H).  **$^{13}\text{C NMR}$  (101 MHz,  $\text{CDCl}_3$ )**  $\delta$  173.78, 135.88, 134.03, 133.64, 130.94, 128.08, 127.97, 126.63, 121.26, 52.73, 36.82, 33.21, 20.37. **IR ( $\nu_{\text{max}}$ ):** 3021.33, 1715.74, 1491.81, 1214.63, 668.65  $\text{cm}^{-1}$ . **HRMS (ESI):**  $m/z$  calcd for  $\text{C}_{17}\text{H}_{16}\text{BrO}_2$   $[\text{M}+\text{H}]^+$  331.0328, found 331.0337.

**Example 39.** Methyl 1-(4-fluorophenyl)-2-phenylcyclopropane-1-carboxylate (**10e**).

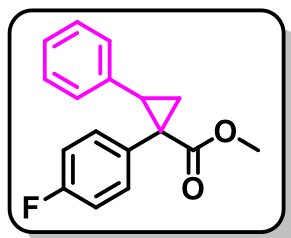

The title compound was synthesised following the general procedure described in section 6.3, and involve corresponding reactant exchange with compound **2c** and compound **9a** (styrene).

The crude mixture was concentrated under vacuum and the product was purified by flash chromatography;  $R_f = 0.5$  (5% ethylacetate/hexane); to give compound **10e** (0.370 g in 6 h, 73%) as a colorless oil.  $^1\text{H NMR}$  (500 MHz,  $\text{CDCl}_3$ )  $\delta$  7.05 – 7.01 (m, 3H), 6.97 – 6.94 (m, 2H), 6.78 – 6.73 (m, 4H), 3.59 (s, 3H), 3.10 (dd,  $J = 9.3, 7.3$  Hz, 1H), 2.12 (dd,  $J = 9.3, 5.0$  Hz, 1H), 1.82 (dd,  $J = 7.3, 5.0$  Hz, 1H).  $^{13}\text{C NMR}$  (101 MHz,  $\text{CDCl}_3$ )  $\delta$  173.92, 162.89, 160.45, 135.99, 133.49, 133.41, 130.66, 130.63, 127.99, 127.76, 126.41, 114.67, 114.46, 52.46, 36.54, 33.09, 20.36.  $^{19}\text{F NMR}$  (377 MHz,  $\text{CDCl}_3$ )  $\delta$  -114.84. IR ( $\nu_{\text{max}}$ ): 3023.59, 2954.03, 1715.89, 1510.89, 1216.92  $\text{cm}^{-1}$ . HRMS (ESI):  $m/z$  calcd for  $\text{C}_{17}\text{H}_{16}\text{FO}_2$   $[\text{M}+\text{H}]^+$  271.1129, found 271.1139.

**Example 40.** Methyl 1-(4-methoxyphenyl)-2-phenylcyclopropane-1-carboxylate (**10f**).

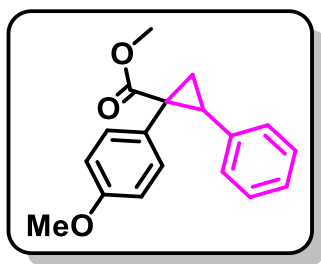

The title compound was synthesised following the general procedure described in section 6.3, and involve corresponding reactant exchange with compound **2d** and compound **9a** (styrene). The crude mixture was concentrated under vacuum and the product was purified by flash chromatography;  $R_f = 0.5$  (5% ethylacetate/hexane); to give compound **10f** (0.403 g in 5 h, 76%) as a colorless oil.  $^1\text{H NMR}$  (400 MHz,  $\text{CDCl}_3$ )  $\delta$  7.04 – 7.00 (m, 3H), 6.92 – 6.90 (m, 2H), 6.76 – 6.73 (m, 2H), 6.62 (d,  $J = 8.6$  Hz, 2H), 3.62 (s, 3H), 3.59 (s, 3H), 3.06 (t,  $J = 8.2$  Hz, 1H), 2.11 – 2.07 (m, 1H), 1.81 – 1.71 (m, 1H).  $^{13}\text{C NMR}$  (101 MHz,  $\text{CDCl}_3$ )  $\delta$  174.64, 158.56, 136.59, 133.03, 128.21, 127.82, 126.87, 126.37, 113.26, 55.07, 52.63, 36.79, 33.30, 20.81. IR ( $\nu_{\text{max}}$ ): 3028.49, 2952.42, 1714.73, 1513.38, 1247.84, 934.88  $\text{cm}^{-1}$ . HRMS (ESI):  $m/z$  calcd for  $\text{C}_{18}\text{H}_{19}\text{O}_3$   $[\text{M}+\text{H}]^+$  283.1329, found 283.1335.



**Example 41.** Methyl 1-(4-nitrophenyl)-2-phenylcyclopropane-1-carboxylate (**10g**).

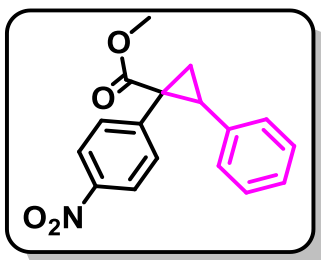

The title compound was synthesised following the general procedure described in section 6.3, and involve corresponding reactant exchange with compound **2e** and compound **9a** (styrene). The crude mixture was concentrated under vacuum and the product was purified by flash chromatography;  $R_f = 0.5$  (5% ethylacetate/hexane); to give compound **10g** (0.373 g in 5 h, 67%) as a colorless oil.  $^1\text{H NMR}$  (500 MHz,  $\text{CDCl}_3$ )  $\delta$  7.99 – 7.97 (m, 2H), 7.21– 7.18 (m, 2H), 7.09 – 7.07 (m, 3H), 6.80 – 6.7 (m, 2H), 3.68 (s, 3H), 3.21 (dd,  $J = 9.3, 7.4$  Hz, 1H), 2.22 (dd,  $J = 9.3, 5.2$  Hz, 1H), 1.96 (dd,  $J = 7.4, 5.2$  Hz, 1H).  $^{13}\text{C NMR}$  (101 MHz,  $\text{CDCl}_3$ )  $\delta$  172.97, 146.94, 142.76, 135.21, 132.89, 128.23, 128.01, 127.06, 122.98, 52.94, 37.04, 33.64, 20.06. IR ( $\nu_{\text{max}}$ ): 3023.03, 2953.82, 1720.22, 1519.83, 1214.04  $\text{cm}^{-1}$ . HRMS (ESI):  $m/z$  calcd for  $\text{C}_{17}\text{H}_{16}\text{NO}_4$   $[\text{M}+\text{H}]^+$  298.1074, found 298.1082.

**Example 42.** Methyl 2-phenyl-1-(2,4,5-trifluorophenyl)cyclopropane-1-carboxylate (**10h**).

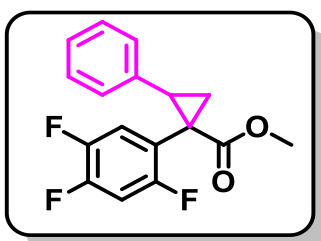

The title compound was synthesised following the general procedure described in section 6.3, and involve corresponding reactant exchange with compound **2k** and compound **9a** (styrene). The crude mixture was concentrated under vacuum and the product was purified by flash chromatography;  $R_f = 0.5$  (5% ethylacetate/hexane); to give compound **10h** (0.368 g in 5 h, 64%) as a colorless oil.  $^1\text{H NMR}$  (400 MHz,  $\text{CDCl}_3$ )  $\delta$  7.11 – 7.09 (m, 3H), 6.88 – 6.85 (m,

3H), 6.67 – 6.60 (m, 1H), 3.68 (s, 3H), 3.22 (dd,  $J = 9.3, 7.6$  Hz, 1H), 2.10 (dd,  $J = 9.4, 5.3$  Hz, 1H), 1.86 (dd,  $J = 7.5, 5.4$  Hz, 1H).  **$^{13}\text{C}$  NMR (126 MHz,  $\text{CDCl}_3$ )**  $\delta$  172.59, 158.68, 158.62, 156.71, 156.64, 150.53, 150.42, 150.32, 148.62, 148.53, 148.43, 148.32, 147.15, 147.13, 147.05, 147.03, 145.50, 145.21, 145.18, 145.11, 145.08, 135.62, 135.19, 129.30, 128.13, 127.94, 127.89, 127.17, 126.94, 120.23, 120.19, 120.08, 120.04, 119.60, 119.56, 119.51, 119.47, 119.43, 105.40, 105.24, 105.18, 105.02, 52.75, 52.10, 33.60, 33.10, 32.27, 19.72, 18.86.  **$^{19}\text{F}$  NMR (471 MHz,  $\text{CDCl}_3$ )**  $\delta$  -113.59, -134.16, -134.20, -143.40, -143.44, -143.47. **IR ( $\nu_{\text{max}}$ ):** 3027.15, 2926.40, 1725.42, 1516.46, 1264.81, 885.38  $\text{cm}^{-1}$ . **HRMS (ESI):**  $m/z$  calcd for  $\text{C}_{17}\text{H}_{14}\text{F}_3\text{O}_2$   $[\text{M}+\text{H}]^+$  307.0940, found 307.0949.

**Example 43.** Methyl 1,2-diphenylcyclopropane-1-carboxylate (**10i**).

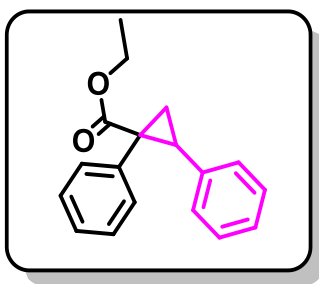

The title compound was synthesised following the general procedure described in section 6.3, and involve corresponding reactant exchange with compound **2l** and compound **9a** (styrene). The crude mixture was concentrated under vacuum and the product was purified by flash chromatography;  $R_f = 0.5$  (5% ethylacetate/hexane); to give compound **10i** (0.395 g in 5 h, 79%) as a colorless oil.  **$^1\text{H}$  NMR (300 MHz,  $\text{CDCl}_3$ )**  $\delta$  7.12 – 7.09 (m, 3H), 7.05 – 7.00 (m, 5H), 6.78 – 6.74 (m, 2H), 4.19 – 4.06 (m, 2H), 3.09 (dd,  $J = 9.3, 7.3$  Hz, 1H), 2.11 (dd,  $J = 9.3, 4.9$  Hz, 1H), 1.86 (dd,  $J = 7.3, 4.9$  Hz, 1H), 1.17 (t,  $J = 7.1$  Hz, 3H).  **$^{13}\text{C}$  NMR (101 MHz,  $\text{CDCl}_3$ )**  $\delta$  173.77, 136.59, 134.99, 132.05, 128.18, 127.80, 127.72, 127.02, 126.38, 61.33, 37.73, 33.04, 20.27, 14.30. **IR ( $\nu_{\text{max}}$ ):** 3028.05, 2983.04, 1711.52, 1451.75, 1252.14, 1164.61  $\text{cm}^{-1}$ . **HRMS (ESI):**  $m/z$  calcd for  $\text{C}_{18}\text{H}_{19}\text{O}_2$   $[\text{M}+\text{H}]^+$  267.1380, found 267.1391.

**Table S11.** Comparative result for C-C bond formation (cyclopropanation).

| Entry | Compound 2a                                                                         | Reagent 9a                                                                          | Product 10a                                                                         | Comparative result                                                                                                                                                                                   |
|-------|-------------------------------------------------------------------------------------|-------------------------------------------------------------------------------------|-------------------------------------------------------------------------------------|------------------------------------------------------------------------------------------------------------------------------------------------------------------------------------------------------|
| 1     | 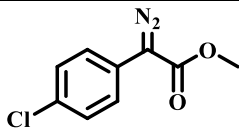   |    |    | 94.7%, 32 min. (our study)<br>Bis(imino)pyridine iron complexes, 12 h, 88% <sup>8</sup><br>Borane-catalyzed, 18-24 h, 83% <sup>9</sup><br>Tris(pentafluorophenyl)borane-catalyzed, 69% <sup>10</sup> |
| 2     |    |    |    | 75%, 32 min. (our study)<br>Rh <sub>2</sub> (S-TPPTTL) <sub>4</sub> , 13 h, 61% <sup>11</sup><br>Rh <sub>2</sub> (S-biTISP) <sub>2</sub> , 22 h, 86% <sup>12</sup>                                   |
| 3     |  |  |  | 73%, 32 min. (our study)<br>bismuth-rhodium complexes, 22 h, 90% (based on <sup>1</sup> H NMR), 32% ee <sup>13</sup>                                                                                 |
| 4     |  |  |  | 76%, 32 min. (our study)<br>Ag, 16 h, 95% <sup>14</sup><br>bis(imino)pyridine iron complex, 12 h, 83% <sup>8</sup>                                                                                   |

## S7 Case study-5: Carbene insertion (C-C bond formation, cyclopropenation) single objective multi-variant auto-optimization.

### S7.1. Background collection

**Sample Preparation:** We prepare 0.5 M stock solution of compound **2a** in DCE, 0.5 M stock solution of reagent **11a** in DCE and 0.5 M stock solution of product **12a** in DCE. The three of the solution taken in three different syringes.

To conduct our analysis, we utilized an In-line FTIR system. The experimental protocol involved the initial introduction of the solvent, DCE, for a duration of 10 min. using a syringe pump, during which data was recorded. Subsequently, a previously prepared stock solution of compound **2a** was similarly introduced into the In-line FTIR for 10 min. This process was repeated for the reaction product **12a** and reagent **11a**, each pumped for 10 min. Upon collecting all relevant data, we identified the signature peak present in the product. Using this peak as a reference, we employed a Bayesian optimizer to fine-tune and optimize the reaction conditions for improved results.

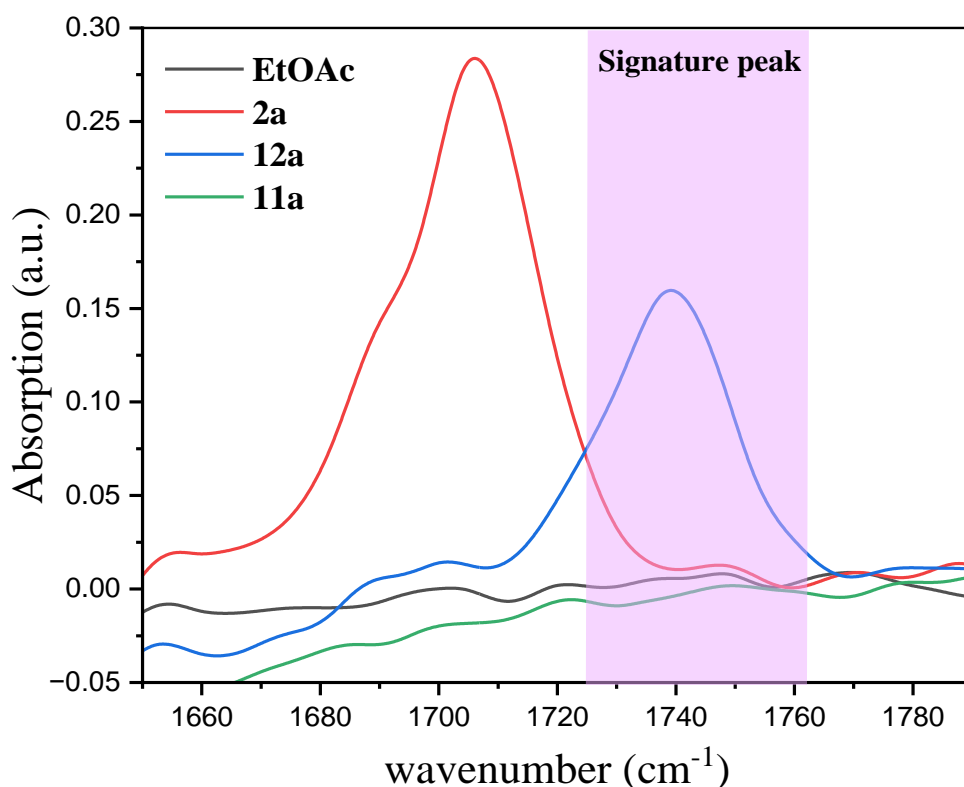

**Figure S38.** In-line IR background analysis of DCE, 0.5 M stock solution of **2a**, **11a**, and **12a** in DCE.

The distinctive shifting peak associated with product (**12a**) aligning within the range of 1730 to 1770  $\text{cm}^{-1}$  was observed. This specific peak, falling within this range, is designated as the signature peak for our analysis. During the optimization of the reaction through Bayesian methods, this signature peak serves as a pivotal reference point. We utilize it to calculate the area under the curve in the In-line FT-IR spectra, providing a quantitative measure of the area in the forthcoming reaction mixture.

### **S7.2. General procedure for the auto-optimized synthesis of compound 12a.**

In our approach we are employing a Python-coded based Bayesian optimization strategy for further refinement. Initial steps involved the preparation of stock solutions for compound **2a** (0.1 M in DCE) and reagent **11a** (0.2 M in DCE), each filled into separate syringes and connected to a syringe pump. The solutions were then directed through a PFA tubular reactor (inner diameter = 1 mm, length = 5.1 m, volume = 4 mL) surrounded by a cylindrical-shaped blue LED light source. Once the solution setup was complete, input ranges for variable flow rates, voltages, and current were specified in the Python code designed for the reaction. The Bayesian optimizer systematically explored these varying reaction conditions, aiming to achieve maximum yield. The optimization process involved running 50-60 experiments and the results were tabulated in the optimization table (Table S12).

### S7.2.1. Python code for optimizing condition of C-C bond formation, (cyclopropanation)

```
ab5.py x
1 from os import listdir
2 from os.path import isfile, join
3 import serial
4
5 import numpy as np
6 import pandas as pd
7 import time
8 from scipy.integrate import trapz
9
10 #step1: be sure to the address of the files that the ftir data is exported is matching to line 11 (mypath)
11 mypath = "C:\\Users\\Admin\\Desktop\\ruchi\\Exp 2023-11-04 15-53"
12 onlyfiles = [f for f in listdir(mypath) if isfile(join(mypath, f))]
13
14
15 #step2: make sure that pump and the potentiostat is correctly addressed in the line 16 and 17
16 pump_1 = serial.Serial("COM4",9600) #Harvard Pump
17 port = serial.Serial("COM1",115200)
18 printer = serial.Serial("COM6", 115200, timeout=1)
19
20
21
22 #step 3: grab the lines from 22 to 90 and press f9
23 def area_under(data,start,end):
24     x = np.flip(data.iloc[start:end,0].to_numpy())
25     y = np.flip(data.iloc[start:end,1].to_numpy())
26     area = trapz(y,x)
27     return np.abs(area)
28
29 def file_namer(num):
30     str1 = str(num)
31     length = int(len((str1)))
32     empt = ''
33     for i in range(5-length):
34         empt = empt+'0'
35
36     return empt+str1
37
38
39 def ftir_extract(filename,init,end):
40     filename = filename
41
42     temp_df = pd.read_csv(filename)
43     # nump_df = temp_df.to_numpy()
44     area = area_under(temp_df, init, end)
45     # max_peak = np.max(nump_df[90:120,1])
46     print(area)
47
```

```

48     return area
49
50
51 def function(flowrate_1,v,i):
52
53     #set the pumps with the flowrate as the desired flowrate for the function
54
55     fr_1 = flowrate_1 #ml/min
56     pump_1.write(('irate '+str(fr_1)+' ml/min\r\n').encode())
57
58     time.sleep(0.1)
59
60     #set the com port for potentiostat and set the voltage and current
61     vol = v
62     curr = i
63     port.write(('VOLT '+str(vol)+'\r\n').encode()) #to change the voltge we need to use "VOLT 1" command
64     port.write(('CURR '+str(curr)+'\r\n').encode()) #to change the current we need to use "CURR 1" command
65
66
67     #pumps run
68     pump_1.write((b'irun\r\n'))
69     time.sleep(0.1)
70     time.sleep(4800)
71
72 def function2(flowrate_1,v,i):
73     time.sleep(180)
74
75     files = [f for f in listdir(mypath) if isfile(join(mypath, f))]
76
77     val = 0
78
79     #change wavelengths as per product here.
80     f_row=13 #first row of range for wavelength as per IR CSV
81     l_row=21 #last row of range for wavelength as per IR CSV
82
83     val += ftir_extract(files[-1],f_row,l_row)
84     val+=ftir_extract(files[-2],f_row,l_row)
85     val+=ftir_extract(files[-3],f_row,l_row)
86
87     avg_val = val/3
88
89     return avg_val
90
91
92 #step 4:grab the line 93 and f9
93 from skopt.optimizer import Optimizer
94

```

```

95
96 #step5:in line 96 we have to define the range that (flowrate,voltage,current) (from,to) and after (anytime) applying changes you need to grab the line 96 an
97 #flowrates are in ml/min, voltage in V, Current in Ampere
98 bounds = [(0.05,0.15),(10,14.5),(4.9,5.0)]
99
100
101 #step 6: grab the line 100 and f9
102 opter =Optimizer(bounds,base_estimator='gp',n_initial_points=3,acq_func="EI",random_state=np.random.randint(3326))
103
104
105 #step7: to selecte number of the cycles that you have to do the experiment and then grab the line 104 to 121 and f9: the closed loop experimentation is initi
106 number_of_cycles = 22
107 results = []
108 flowrates_1 = []
109 vs = []
110 currents = []
111
112 product_wavelength=True #set to true if product wavelengths being monitored
113
114 if product_wavelength == True:
115     val=1
116 else:
117     val=-1
118
119
120 # Step 8: Test Tubes on Printer
121 USE_PRINTER = True
122 REST_HEIGHT = 200
123 X_HOME = -5
124 Y_HOME = 20
125 Z_HOME = 175
126 DEFAULT_PUMP_TIME="1"
127 # Distance between test tubes
128 X_SPACING=20
129 Y_SPACING=20
130 # Number of test tubes
131 X_ROWS = 11
132 Y_COLUMNS = 4
133
134 def send_cmd(cmd):
135     print(cmd)
136     printer.write(f"{cmd}\n".encode("ASCII"))
137
138 def move(x=None, y=None, z=None):

```



```

139 s = "G0"
140 if x is not None:
141     s += f"X{x}"
142 if y is not None:
143     s += f"Y{y}"
144 if z is not None:
145     s += f"Z{z}"
146
147 s+= "F5000"
148 send_cmd(s)
149
150 def printer_positions():
151     for j in range(Y_COLUMNS):
152         for i in range(X_ROWS):
153             if j%2==1:
154                 yield (X_HOME + (X_ROWS - 1 - i) * X_SPACING, Y_HOME + j * Y_SPACING, Z_HOME)
155             else:
156                 yield (X_HOME + i * X_SPACING, Y_HOME + j * Y_SPACING, Z_HOME)
157
158 # Run this.
159 tube_location = list(printer_positions())
160
161
162 for i in range(number_of_cycles):
163     move(*tube_location[2*i])
164     asked = opter.ask()
165     function(asked[0],asked[1],asked[2])
166     move(*tube_location[2*i+1])
167     told = function2(asked[0],asked[1],asked[2])
168
169     print(f"area under the curve in the round {i:.2f} = {told: .2f}")
170     opter.tell(asked, -told*val)
171     results.append(told)
172     flowrates_1.append(asked[0])
173     vs.append(asked[1])
174     currents.append(asked[2])
175
176     dict1 = {"flowrate_1":flowrates_1,"voltages":vs, "currents":currents,"area-results":results}
177     df2 = pd.DataFrame(dict1)
178     df2.to_csv("output round "+str(i)+".csv")
179
180
181
182 pump_1.write(b'stop\r\n')
183
184
185

```

**Table S12.** Auto-optimization table of C-C bond formation, (cyclopropenation)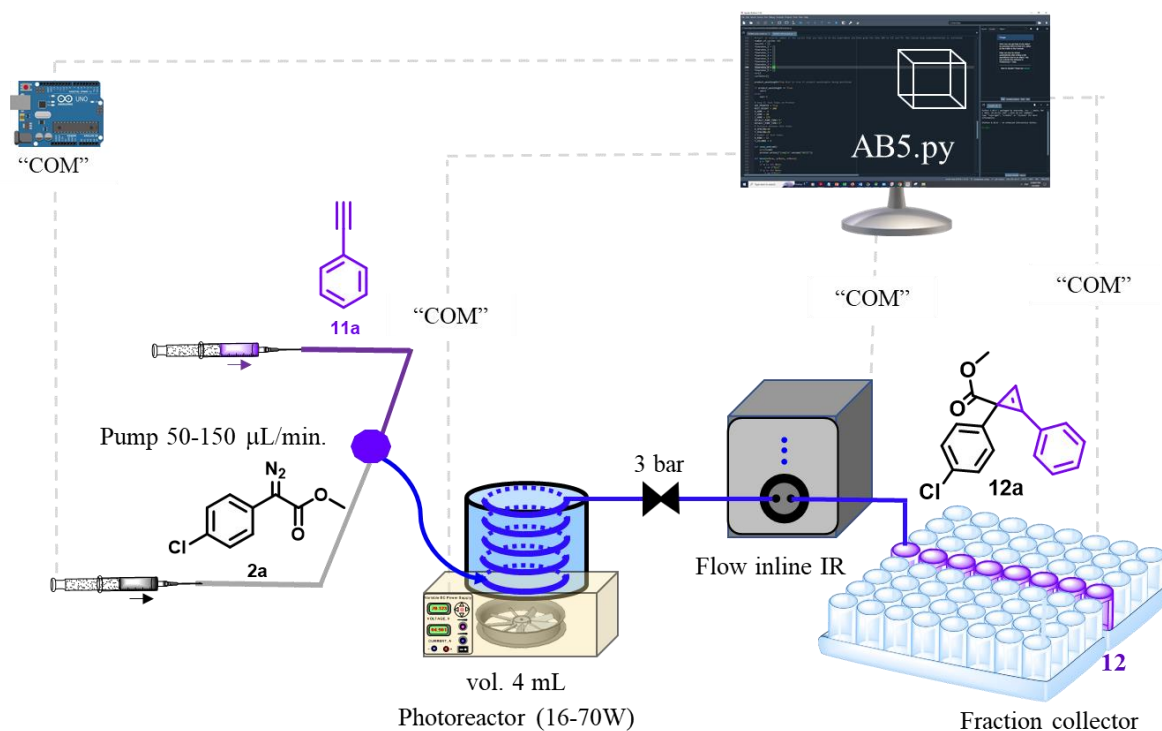

| No. of experiments | Flow rate mL/min | Voltage (V) | Light intensity (W) | area-results | Yield (%) | Space time yield (g mL <sup>-1</sup> h <sup>-1</sup> ) |
|--------------------|------------------|-------------|---------------------|--------------|-----------|--------------------------------------------------------|
| 1                  | 0.120701         | 14.1092     | 60.443              | 0.454837     | 73.79562  | 0.018972347                                            |
| 2                  | 0.090227         | 14.0756     | 60.142              | 0.467826     | 75.90304  | 0.014587312                                            |
| 3                  | 0.066047         | 10.6181     | 20.55               | 0.114833     | 18.63123  | 0.002621043                                            |
| 4                  | 0.052175         | 14.1067     | 60.91               | 0.445654     | 72.30571  | 0.008035533                                            |
| 5                  | 0.05922          | 10.4612     | 19.499              | 0.106311     | 17.24857  | 0.00217571                                             |
| 6                  | 0.127527         | 13.1035     | 49.136              | 0.358988     | 58.24447  | 0.015821093                                            |
| 7                  | 0.130375         | 10.6304     | 21.864              | 0.249116     | 40.41815  | 0.01122407                                             |
| 8                  | 0.093723         | 14.4455     | 68.115              | 0.583323     | 94.642    | 0.018893381                                            |
| 9                  | 0.069852         | 12.4586     | 49.071              | 0.41648      | 67.57234  | 0.010053734                                            |
| 10                 | 0.15             | 14.5        | 68.251              | 0.48846      | 79.25083  | 0.025320639                                            |
| 11                 | 0.149893         | 10.9074     | 23.886              | 0.260363     | 42.24293  | 0.01348699                                             |
| 12                 | 0.099249         | 14.5        | 68.105              | 0.574865     | 93.26972  | 0.019717253                                            |
| 13                 | 0.05             | 14.5        | 68.077              | 0.497185     | 80.66643  | 0.008590974                                            |
| 14                 | 0.15             | 11.2061     | 26.928              | 0.254111     | 41.22857  | 0.013172528                                            |
| 15                 | 0.11223          | 14.5        | 68.352              | 0.539139     | 87.47331  | 0.020910486                                            |

|           |                 |                |               |                 |                 |                    |
|-----------|-----------------|----------------|---------------|-----------------|-----------------|--------------------|
| 16        | 0.144445        | 14.5           | 68.164        | 0.452476        | 73.41256        | 0.022586684        |
| 17        | 0.064064        | 14.5           | 68.091        | 0.514453        | 83.4681         | 0.011389749        |
| 18        | 0.054786        | 10.9936        | 24.807        | 0.238132        | 38.63604        | 0.004508601        |
| 19        | 0.098561        | 13.1959        | 50.192        | 0.135787        | 22.03094        | 0.004625063        |
| 20        | 0.107359        | 10.7921        | 22.836        | 0.231832        | 37.61388        | 0.008601343        |
| 21        | 0.099419        | 13.6901        | 56.831        | 0.288356        | 46.78469        | 0.009907242        |
| <b>22</b> | <b>0.099154</b> | <b>14.4518</b> | <b>69.581</b> | <b>0.591693</b> | <b>96.00162</b> | <b>0.020275353</b> |
| 23        | 0.078101        | 10.4687        | 19.751        | 0.212029        | 34.40092        | 0.005722277        |
| 24        | 0.149026        | 13.6182        | 55.984        | 0.326608        | 52.99094        | 0.016820669        |
| 25        | 0.128138        | 12.0086        | 35.58         | 0.349058        | 56.63337        | 0.015457169        |
| 26        | 0.133455        | 13.0499        | 48.233        | 0.377999        | 61.32894        | 0.017433312        |
| 27        | 0.138758        | 11.0478        | 25.215        | 0.373725        | 60.6355         | 0.017921097        |
| 28        | 0.15            | 10.2395        | 17.684        | 0.307325        | 49.86234        | 0.015931019        |
| 29        | 0.09817         | 14.4834        | 68.2          | 0.559436        | 90.76642        | 0.018979449        |
| 30        | 0.091267        | 13.7496        | 57.585        | 0.510067        | 82.75648        | 0.016087754        |
| 31        | 0.126242        | 12.456         | 40.893        | 0.384914        | 62.45087        | 0.016792756        |
| 32        | 0.068906        | 12.2385        | 38.326        | 0.424445        | 68.86463        | 0.010107247        |
| 33        | 0.092488        | 14.5           | 68.324        | 0.56245         | 91.25543        | 0.017977269        |
| 34        | 0.112444        | 13.2561        | 51.079        | 0.403716        | 65.50143        | 0.015687966        |
| 35        | 0.075546        | 14.4222        | 67.192        | 0.506462        | 82.17159        | 0.013222475        |
| 36        | 0.088877        | 13.7497        | 57.553        | 0.351022        | 56.95202        | 0.010781474        |
| 37        | 0.092205        | 13.7496        | 57.553        | 0.373007        | 60.51901        | 0.01188573         |
| 38        | 0.097674        | 14.4875        | 67.973        | 0.565181        | 91.69853        | 0.019077477        |
| 39        | 0.125538        | 12.4198        | 40.238        | 0.361648        | 58.67605        | 0.015689738        |
| 40        | 0.125824        | 12.4595        | 40.787        | 0.387129        | 62.81025        | 0.016833468        |
| 41        | 0.12398         | 12.5461        | 42.079        | 0.403667        | 65.49348        | 0.017295347        |
| 42        | 0.139188        | 10.9791        | 24.766        | 0.253061        | 41.05821        | 0.012172546        |
| 43        | 0.15            | 12.1401        | 37.379        | 0.251172        | 40.75173        | 0.013020177        |
| 44        | 0.15            | 10.8394        | 23.41         | 0.227043        | 36.83689        | 0.011769385        |
| 45        | 0.133045        | 12.5478        | 42.296        | 0.293369        | 47.59803        | 0.01348861         |
| 46        | 0.15            | 13.8612        | 59.614        | 0.303369        | 49.2205         | 0.015725949        |
| 47        | 0.149999        | 11.0341        | 25.511        | 0.233369        | 37.86326        | 0.01209723         |
| 48        | 0.050002        | 11.4698        | 29.911        | 0.173369        | 28.12848        | 0.002995803        |

|    |          |         |        |          |          |             |
|----|----------|---------|--------|----------|----------|-------------|
| 49 | 0.098806 | 14.4781 | 67.772 | 0.569669 | 92.4267  | 0.019451826 |
| 50 | 0.149282 | 10.0468 | 16.022 | 0.133369 | 21.63863 | 0.006880448 |
| 51 | 0.140899 | 11.6944 | 32.679 | 0.264725 | 42.95065 | 0.012890129 |
| 52 | 0.137499 | 14.2234 | 65.412 | 0.395556 | 64.17815 | 0.018796038 |
| 53 | 0.063767 | 10.58   | 21.028 | 0.221869 | 35.99742 | 0.004889304 |
| 54 | 0.138262 | 11.4412 | 29.286 | 0.208132 | 33.76865 | 0.009944801 |
| 55 | 0.076134 | 13.8555 | 59.2   | 0.413512 | 67.09079 | 0.010879806 |

**Reaction condition:** compound **2a** (0.1 M in DCE); reagent **11a** (0.2 M in DCE); 4 mL reactor volume.

**Graph:**

We have plotted 3D graph of optimization table S12, we have taken flow rate on X-axis, blue light intensity (watt) on Y-axis and product yield on Z axis.

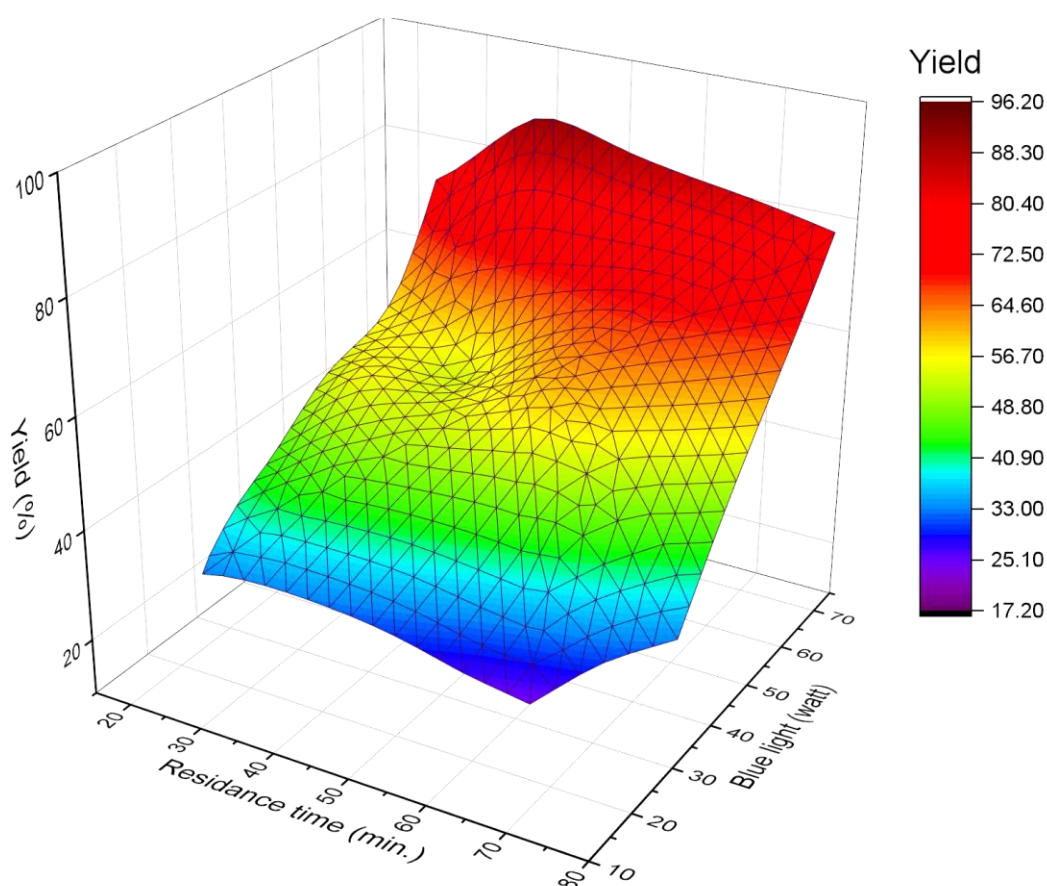

**Figure S39.** AI based system to auto-optimize and navigate this complexity and identify the optimal conditions for the photo activated cyclopropanation reaction. Compound **2a** (0.1 M in DCE); reagent **11a** (0.2 M in DCE); 4 mL reactor volume.

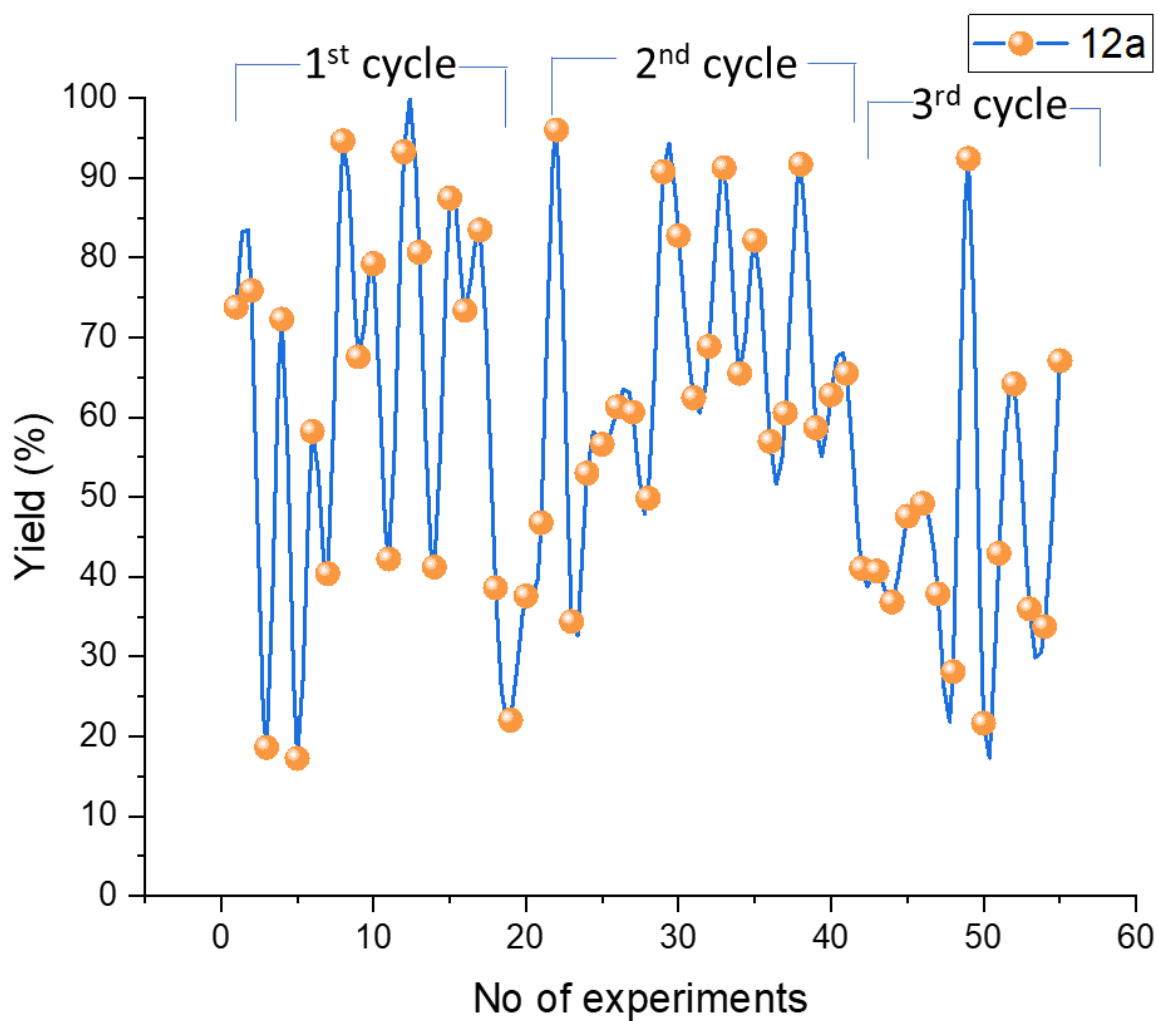

**Figure S40.** 2D graph between no of experiments performed versus yield (%) for the AI based auto-optimization of photo activated cyclopropanation reaction. Compound **2a** (0.1 M in DCE); reagent **11a** (0.2 M in DCE); 4 mL reactor volume.

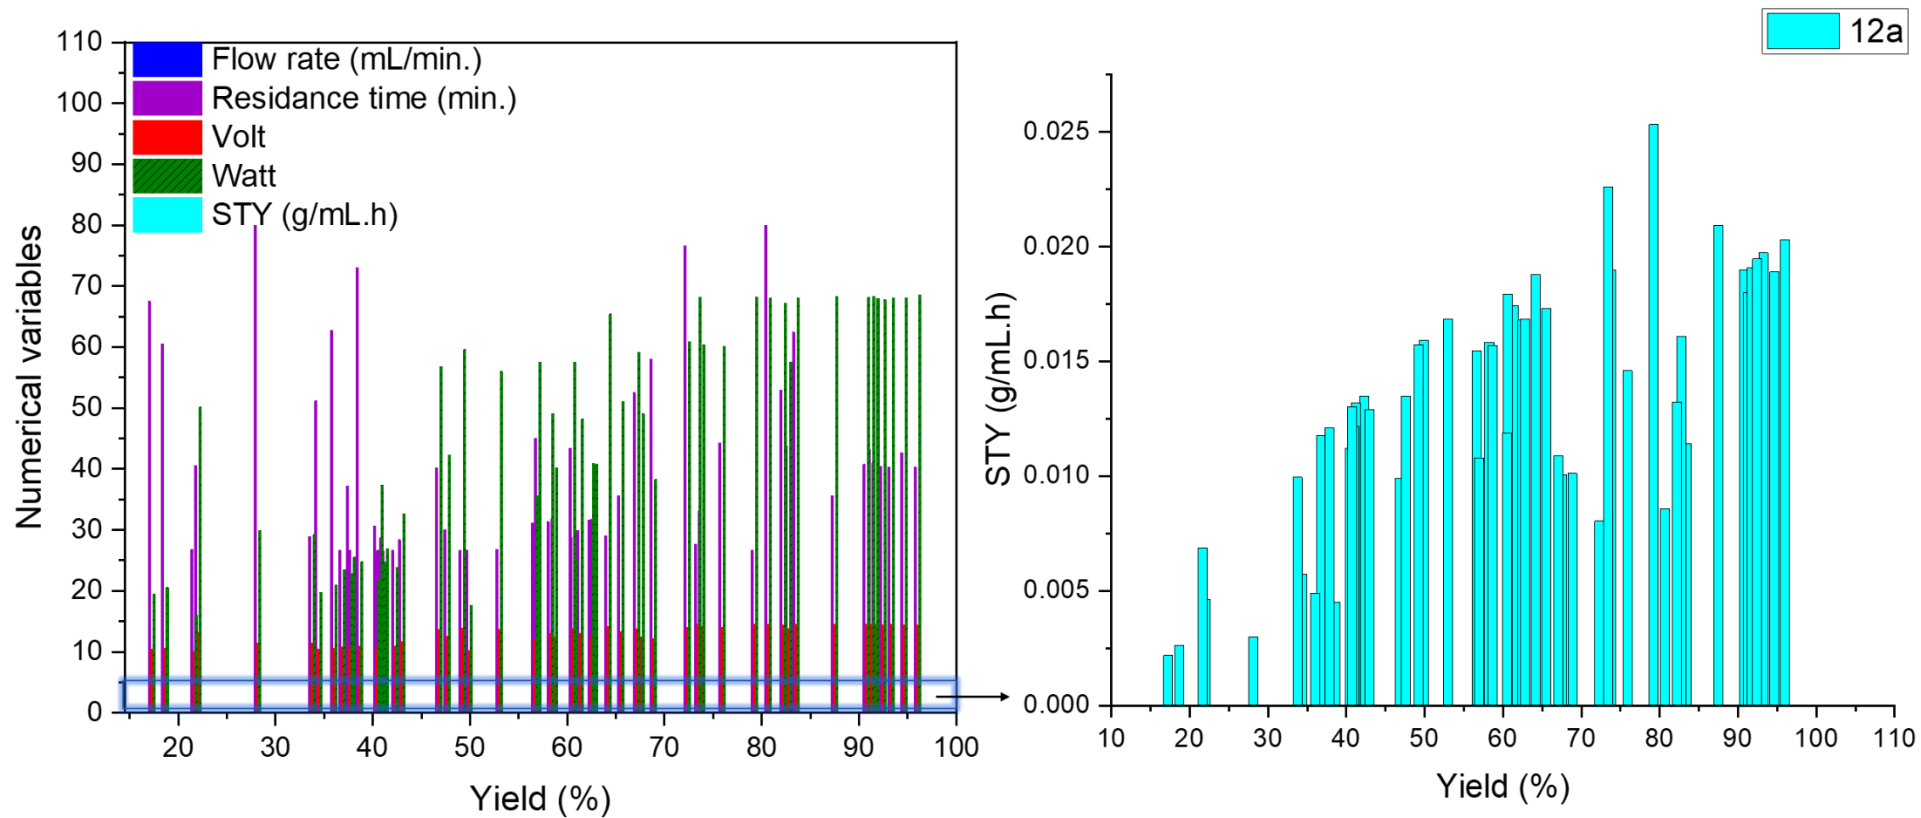

**Figure S41.** AI based system navigated multi-numerical variable complexity and identify the optimal condition for the photo activated cyclopropanation reaction. Compound **2a** (0.1 M in DCE); reagent **11a** (0.2 M in DCE); 4 mL reactor volume.

### S7.3. General procedure for AI optimized carbene insertion into the triple bonds of aromatic alkynes for synthesis of compound **12a**

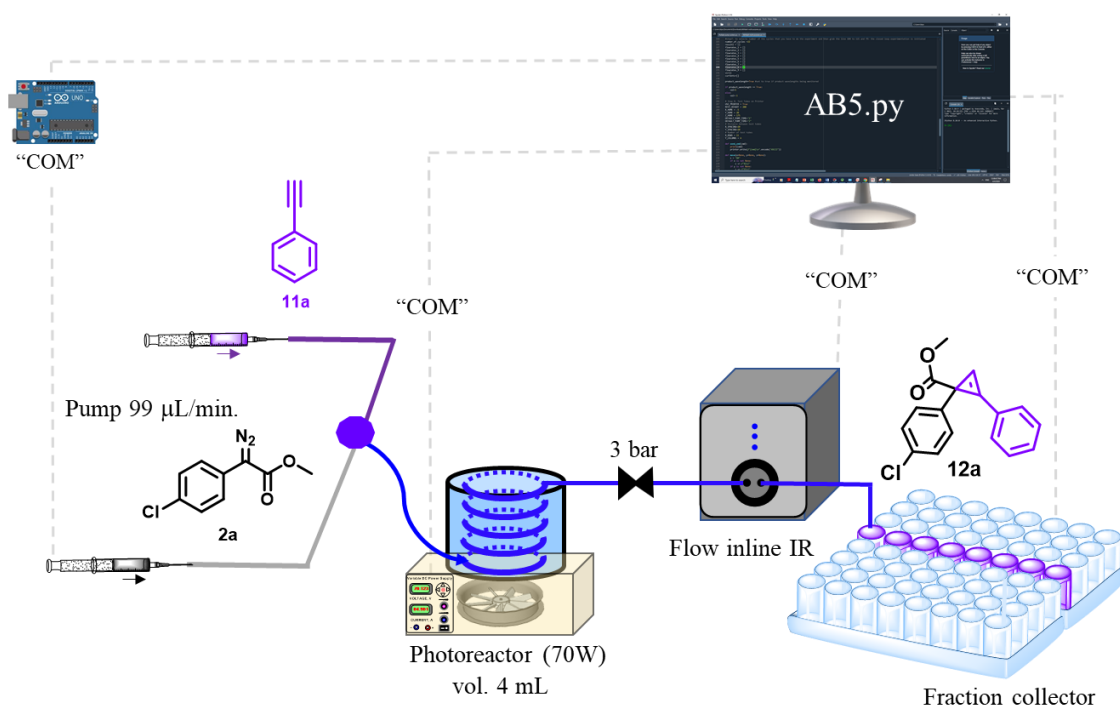

**Figure S42.** Schematic presentation of continuous flow for the synthesis, of compound **12a**.

To prepare the stock solution of compound **2a** (2.20 g, 0.01 mol) was dissolved in ethyl acetate (100 mL) and connected with pump. Another pump was connected with the reagent **11a** (2.3 mL, 0.02 mol) dissolved in ethyl acetate (100 mL). These two pump out-put is further connected with the T<sub>1</sub>-mixer and pumps were running with the flow rate 50 μL/min.each to maintain the stoichiometry and then passed through PFA tubular reactor (id = 1000 μm, l = 5 m, vol. = 4 mL) under blue light (68.581 W) exposure. The room temperature of the reactor was controlled by fan attached to the bottom of the photochemical reactor. The out-put of the tubular reactor was connected with spring based back pressure regulator (~3 bar) to maintain the evaporation. First one hour of the product mixture was discarded and next 5 h of the product mixture [30 mL; **2a** (0.315 g)] was collected in HPLC bottle. The organic EtOAc phase was concentrated under reduced pressure to give the product **12a** (0.410 g in 5 h, 96%) as a yellow

oil.  **$^1\text{H NMR}$  (400 MHz,  $\text{CDCl}_3$ )**  $\delta$  7.59 – 7.57 (m, 2H), 7.42 – 7.39 (m, 3H), 7.34 – 7.31 (m, 2H), 7.25 – 7.22 (m, 2H), 7.17 (s, 1H), 3.70 (s, 3H).  **$^{13}\text{C NMR}$  (126 MHz,  $\text{CDCl}_3$ )**  $\delta$  174.65, 139.48, 132.32, 130.25, 129.94, 129.68, 129.01, 128.23, 125.11, 117.09, 99.86, 52.32, 32.98. **IR** ( $\nu_{\text{max}}$ ): 3021.78, 1720.27, 1595.83, 1490.51, 1214.17, 830.32  $\text{cm}^{-1}$ . **HRMS (ESI)**:  $m/z$  calcd for  $\text{C}_{17}\text{H}_{14}\text{ClO}_2$   $[\text{M}+\text{H}]^+$  285.0677, found 285.0686. Verified the analytical data with those reported in the literature.<sup>15</sup>

### Space time yield in previous reported batch process <sup>15</sup>

Productivity = 67 mg in 16 h

$$\text{Productivity (per h)} := \frac{0.067}{16} = 0.0041 \text{ g/h}$$

$$\text{Space time yield} := \frac{\text{productivity}}{\text{volume of reactor}}$$

$$= \frac{0.0041}{2} = 0.002 \text{ g mL}^{-1} \text{ h}^{-1}$$



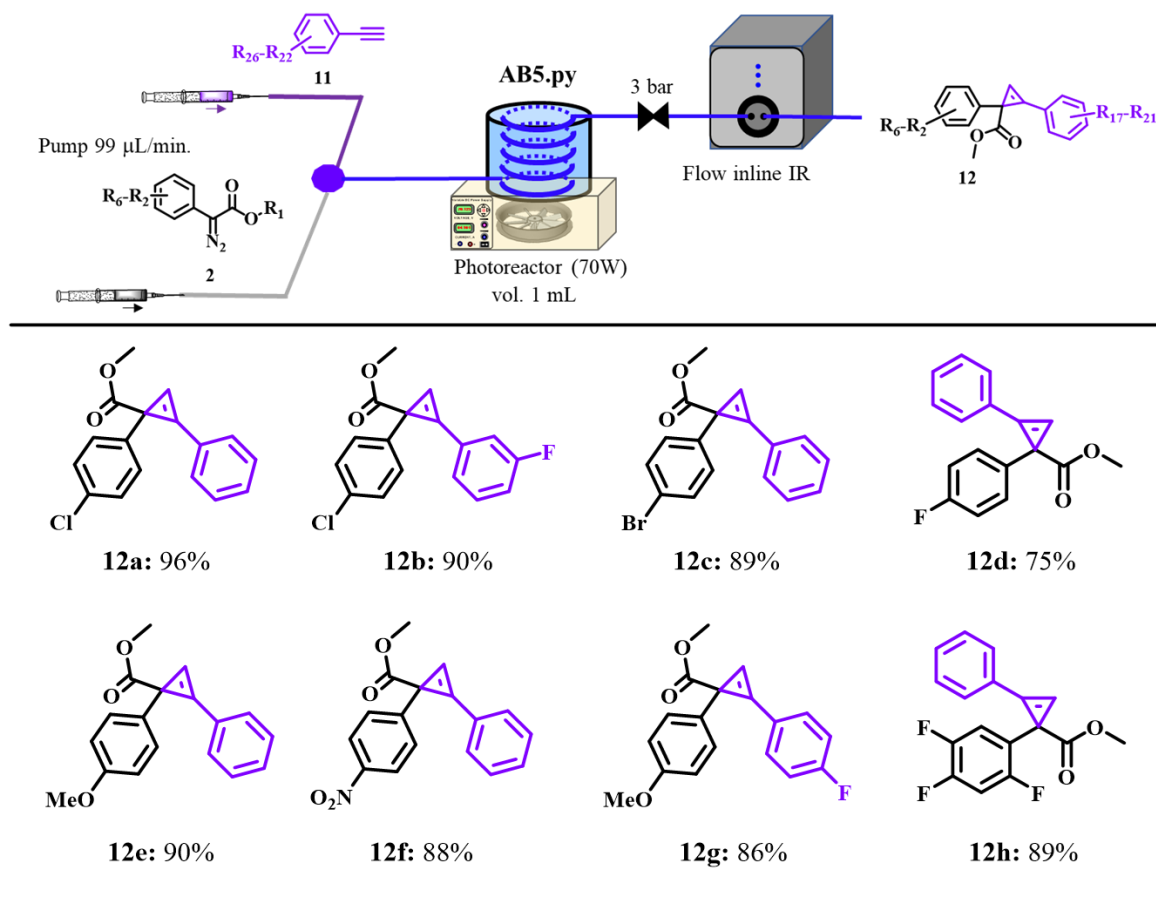

**Figure S43.** Scope of substrate for the photo activated cyclopropanation reaction. Compound **2a** (0.1 M in DCE); reagent **11a** (0.2 M in DCE); 4 mL reactor volume.

**S.7.3.1. General procedure for scope of substrate for carbene insertion into the S–H bonds of organic aromatic thiol for synthesis of compound 12b-12h.**

**Example 45.** Methyl 1-(4-chlorophenyl)-2-(3-fluorophenyl)cycloprop-2-ene-1-carboxylate (**12b**).

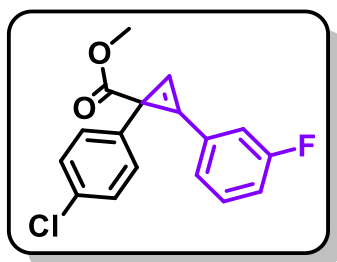

The title compound was synthesised following the general procedure described in section 7.3, and involve corresponding reactant exchange with compound **2a** and compound **11b** (1-ethynyl-3-fluorobenzene). The crude mixture was concentrated under vacuum and the product was purified by flash chromatography;  $R_f = 0.4$  (5% ethylacetate/hexane); to give compound **12b** (0.410 g in 5 h, 90%) as a yellow oil.  $^1\text{H NMR}$  (500 MHz,  $\text{CDCl}_3$ )  $\delta$  7.42 – 7.35 (m, 2H), 7.32 – 7.23 (m, 6H), 7.12 – 7.08 (m, 1H), 3.71 (s, 3H).  $^{13}\text{C NMR}$  (101 MHz,  $\text{CDCl}_3$ )  $\delta$  174.26, 164.08, 161.62, 139.02, 132.52, 130.72, 130.64, 129.59, 129.28, 128.32, 127.11, 125.66, 125.64, 117.45, 117.24, 116.60, 116.38, 101.44, 52.40, 33.28.  $^{19}\text{F NMR}$  (471 MHz,  $\text{CDCl}_3$ )  $\delta$  -112.83 (s).  $\text{IR}$  ( $\nu_{\text{max}}$ ): 3021.73, 1726.97, 1587.32, 1214.51, 1014.81  $\text{cm}^{-1}$ .  $\text{HRMS}$  (ESI):  $m/z$  calcd for  $\text{C}_{17}\text{H}_{13}\text{ClFO}_2$   $[\text{M}+\text{H}]^+$  303.0583, found 303.0597.

**Example 46.** Methyl 1-(4-bromophenyl)-2-phenylcycloprop-2-ene-1-carboxylate (**12c**).

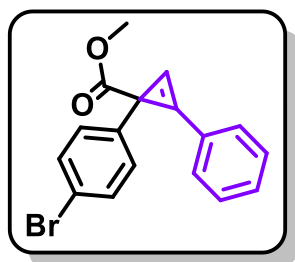

The title compound was synthesised following the general procedure described in section 7.3, and involve corresponding reactant exchange with compound **2b** and compound **11a** (ethynylbenzene). The crude mixture was concentrated under vacuum and the product was purified by flash chromatography;  $R_f = 0.4$  (5% ethylacetate/hexane); to give compound **12c** (0.440 g in 5 h, 89%) as a colorless oil.  $^1\text{H NMR}$  (400 MHz,  $\text{CDCl}_3$ )  $\delta$  7.59 – 7.57 (m, 2H), 7.42 – 7.39 (m, 3H), 7.33 (d,  $J = 12.0$  Hz, 2H), 7.24 (d,  $J = 8.5$  Hz, 2H), 7.17 (s, 1H), 3.70 (s, 3H).  $^{13}\text{C NMR}$  (101 MHz,  $\text{CDCl}_3$ )  $\delta$  174.57, 140.01, 131.18, 130.28, 130.07, 129.95, 129.03, 125.09, 120.45, 117.04, 99.78, 52.34, 33.06.  $\text{IR}$  ( $\nu_{\text{max}}$ ): 3136.19, 2950.74, 1719.37, 1587.93, 1216.09, 629.14  $\text{cm}^{-1}$ .  $\text{HRMS}$  (ESI):  $m/z$  calcd for  $\text{C}_{17}\text{H}_{14}\text{BrO}_2$   $[\text{M}+\text{H}]^+$  329.0172, found 329.0180.

**Example 47.** Methyl 1-(4-fluorophenyl)-2-phenylcycloprop-2-ene-1-carboxylate (**12d**).

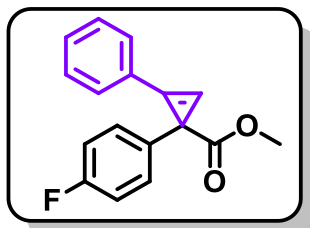

The title compound was synthesised following the general procedure described in section 7.3, and involve corresponding reactant exchange with compound **2c** and compound **11a** (ethynylbenzene). The crude mixture was concentrated under vacuum and the product was purified by flash chromatography;  $R_f = 0.4$  (5% ethylacetate/hexane); to give compound **12d** (0.302 g in 5 h, 75%) as a yellow oil.  $^1\text{H NMR}$  (500 MHz,  $\text{CDCl}_3$ )  $\delta$  7.64 – 7.62 (m, 2H), 7.47 – 7.38 (m, 5H), 7.22 (s, 1H), 7.01 – 6.98 (m, 2H), 3.73 (s, 3H).  $^{13}\text{C NMR}$  (101 MHz,  $\text{CDCl}_3$ )  $\delta$  174.96, 162.85, 160.42, 136.79, 130.22, 129.95, 129.90, 129.04, 125.30, 117.41, 115.07, 114.86, 100.23, 52.33, 32.95.  $^{19}\text{F NMR}$  (377 MHz,  $\text{CDCl}_3$ )  $\delta$  -116.21. IR ( $\nu_{\text{max}}$ ): 3024.19, 2952.42, 1718.44, 1507.81, 1217.41, 1019.92, 837.24  $\text{cm}^{-1}$ . HRMS (ESI):  $m/z$  calcd for  $\text{C}_{17}\text{H}_{14}\text{FO}_2$   $[\text{M}+\text{H}]^+$  269.0972, found 269.0990.

**Example 48.** Methyl 1-(4-methoxyphenyl)-2-phenylcycloprop-2-ene-1-carboxylate (**12e**).

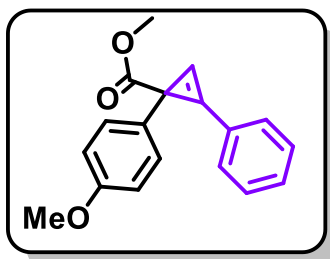

The title compound was synthesised following the general procedure described in section 7.3, and involve corresponding reactant exchange with compound **2d** and compound **11a** (ethynylbenzene). The crude mixture was concentrated under vacuum and the product was purified by flash chromatography;  $R_f = 0.4$  (5% ethylacetate/hexane); to give compound **12e**

(0.380 g in 5 h, 90%) as a yellow oil. **<sup>1</sup>H NMR (400 MHz, CDCl<sub>3</sub>)** δ 7.60 – 7.58 (m, 2H), 7.40 – 7.30 (m, 5H), 7.18 (s, 1H), 6.81 (d, *J* = 8.7 Hz, 2H), 3.72 (s, 3H), 3.68 (s, 3H). **<sup>13</sup>C NMR (101 MHz, CDCl<sub>3</sub>)** δ 175.36, 158.32, 133.16, 130.02, 129.93, 129.40, 128.96, 125.59, 117.71, 113.62, 100.63, 55.25, 52.23. **IR (ν<sub>max</sub>):** 3021.06, 1718.02, 1606.03, 1511.72, 1214.64 cm<sup>-1</sup>. **HRMS (ESI):** *m/z* calcd for C<sub>18</sub>H<sub>17</sub>O<sub>3</sub> [M+H]<sup>+</sup> 281.1172, found 281.1185.

**Example 49.** Methyl 1-(4-nitrophenyl)-2-phenylcycloprop-2-ene-1-carboxylate (**12f**).

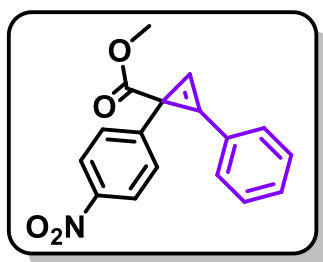

The title compound was synthesised following the general procedure described in section 7.3, and involve corresponding reactant exchange with compound **2e** and compound **11a** (ethynylbenzene). The crude mixture was concentrated under vacuum and the product was purified by flash chromatography; **R<sub>f</sub>** = 0.4 (5% ethylacetate/hexane); to give compound **12f** (0.390 g in 5 h, 88%) as a yellow oil. **<sup>1</sup>H NMR (400 MHz, CDCl<sub>3</sub>)** δ 8.16 – 8.13 (m, 2H), 7.60 – 7.56 (m, 4H), 7.47 – 7.44 (m, 3H), 7.19 (s, 1H), 3.73 (s, 3H). **<sup>13</sup>C NMR (101 MHz, CDCl<sub>3</sub>)** δ 173.75, 148.59, 146.45, 130.63, 129.99, 129.13, 129.05, 124.45, 123.33, 116.18, 98.99, 52.46, 33.25. **IR (ν<sub>max</sub>):** 3022.46, 2925.68, 1722.41, 1520.33, 1215.42 cm<sup>-1</sup>. **HRMS (ESI):** *m/z* calcd for C<sub>17</sub>H<sub>14</sub>NO<sub>4</sub> [M+H]<sup>+</sup> 296.0917, found 296.0927.

**Example 50.** Methyl 2-(4-fluorophenyl)-1-(4-methoxyphenyl)cycloprop-2-ene-1-carboxylate (**12g**).

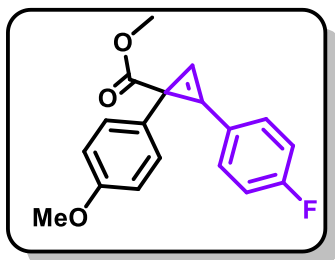

The title compound was synthesised following the general procedure described in section 7.3, and involve corresponding reactant exchange with compound **2a** and compound **11c** (1-ethynyl-4-fluorobenzene). The crude mixture was concentrated under vacuum and the product was purified by flash chromatography;  $R_f = 0.4$  (5% ethylacetate/hexane); to give compound **12g** (0.385 g in 5 h, 86%) as a yellow oil.  $^1\text{H NMR}$  (400 MHz,  $\text{CDCl}_3$ )  $\delta$  7.60 – 7.58 (m, 2H), 7.40 – 7.30 (m, 5H), 6.81 (d,  $J = 8.8$  Hz, 2H), 3.72 (s, 3H), 3.68 (s, 3H).  $^{13}\text{C NMR}$  (101 MHz,  $\text{CDCl}_3$ )  $\delta$  175.36, 158.32, 133.16, 130.02, 129.93, 129.40, 128.96, 125.59, 117.71, 113.62, 100.63, 55.25, 52.23.  $^{19}\text{F NMR}$  (376 MHz,  $\text{CDCl}_3$ )  $\delta$  -110.11, IR ( $\nu_{\text{max}}$ ): 2954.04, 2844.40, 1723.50, 1602.75, 1247.68, 1029.28  $\text{cm}^{-1}$ . HRMS (ESI):  $m/z$  calcd for  $\text{C}_{18}\text{H}_{16}\text{FO}_3$   $[\text{M}+\text{H}]^+$  299.1078, found 299.1089.

**Example 51.** Methyl 2-phenyl-1-(2,4,5-trifluorophenyl)cycloprop-2-ene-1-carboxylate (**12h**).

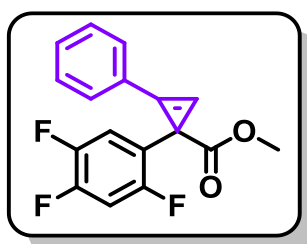

The title compound was synthesised following the general procedure described in section 7.3, and involve corresponding reactant exchange with compound **2k** and compound **11a** (ethynylbenzene). The crude mixture was concentrated under vacuum and the product was purified by flash chromatography;  $R_f = 0.4$  (5% ethylacetate/hexane); to give compound **12h** (0.408 g in 5 h, 89%) as a yellow oil.  $^1\text{H NMR}$  (500 MHz,  $\text{CDCl}_3$ )  $\delta$  7.66 – 7.65 (m, 2H), 7.48

– 7.42 (m, 3H), 7.22 (s, 1H), 7.03 – 6.98 (m, 1H), 6.93 – 6.88 (m, 1H), 3.71 (s, 3H). **<sup>13</sup>C NMR (176 MHz, CDCl<sub>3</sub>)** δ 174.06, 157.56, 156.13, 149.99, 148.57, 147.43, 145.97, 130.64, 130.05, 129.14, 125.39, 125.29, 124.77, 118.69, 117.83, 117.75, 105.78, 105.62, 105.50, 98.98, 52.69, 29.83, 29.28. **<sup>19</sup>F NMR (471 MHz, CDCl<sub>3</sub>)** δ -115.94, -115.96, -135.30, -135.34, -142.94, -142.98, -143.01. **IR (ν<sub>max</sub>):** 3071.13, 2956.10, 1724.39, 1512.59, 1247.95, 880.71 cm<sup>-1</sup>. **HRMS (ESI):** *m/z* calcd for C<sub>17</sub>H<sub>12</sub>F<sub>3</sub>O<sub>2</sub> [M+H]<sup>+</sup> 305.0784, found 305.0797.

**Table S13.** Comparative result for C-C bond formation, (cyclopropenation).

| Entry | Compound 2a | Reagent 11a | Product 12a | Comparative result                                                                                                                               |
|-------|-------------|-------------|-------------|--------------------------------------------------------------------------------------------------------------------------------------------------|
| 1     |             |             |             | 95%, 40 min, (our study)<br>Blue LED, 16 h, 80%<br><sup>15</sup><br>dirhodium tetraacetate, 10 h,<br>72%<br><sup>16</sup>                        |
| 2     |             |             |             | 89%, 40 min, (our study)<br>Cu, 16h, 81%<br><sup>17</sup><br>dirhodium tetraacetate, 10h, 69%<br><sup>16</sup>                                   |
| 3     |             |             |             | 75%, 40 min, (our study)<br>tris(pentafluorophenyl)borate,<br>24h, 75%<br><sup>18</sup><br>Irradiation, 16 h, 56%<br><sup>15</sup>               |
| 4     |             |             |             | 90%, 40 min, (our study)<br>tris(pentafluorophenyl)borate,<br>24h, 50%<br><sup>18</sup><br>dirhodium tetraacetate, 10 h,<br>50%<br><sup>19</sup> |
| 5     |             |             |             | 88%, 40 min, (our study)<br>dirhodium tetraacetate, 64%<br><sup>20</sup>                                                                         |

## **S8. Case study-6: Carbene insertion (N-C-O bond formation, oxazole) single objective multi-variant auto-optimization.**

### **S.8.1 Background collection**

**Sample Preparation:** We prepare 0.5 M stock solution of compound **2a** in DCE, 0.5 M stock solution of reagent **13a** in DCE and 0.5 M stock solution of product **14a** in DCE. The three of the solution taken in three different syringes.

To conduct our analysis, we utilized an In-line FTIR system. The experimental protocol involved the initial introduction of the solvent, DCE, for a duration of 10 min. using a syringe pump, during which data was recorded. Subsequently, a previously prepared stock solution of compound **2a** was similarly introduced into the In-line FTIR for 10 min. This process was repeated for the reaction product **14a** and reagent **13a**, each pumped for 10 min. Upon collecting all relevant data, we identified the signature peak present in the product. Using this peak as a reference, we employed a Bayesian optimizer to fine-tune and optimize the reaction conditions for improved results.



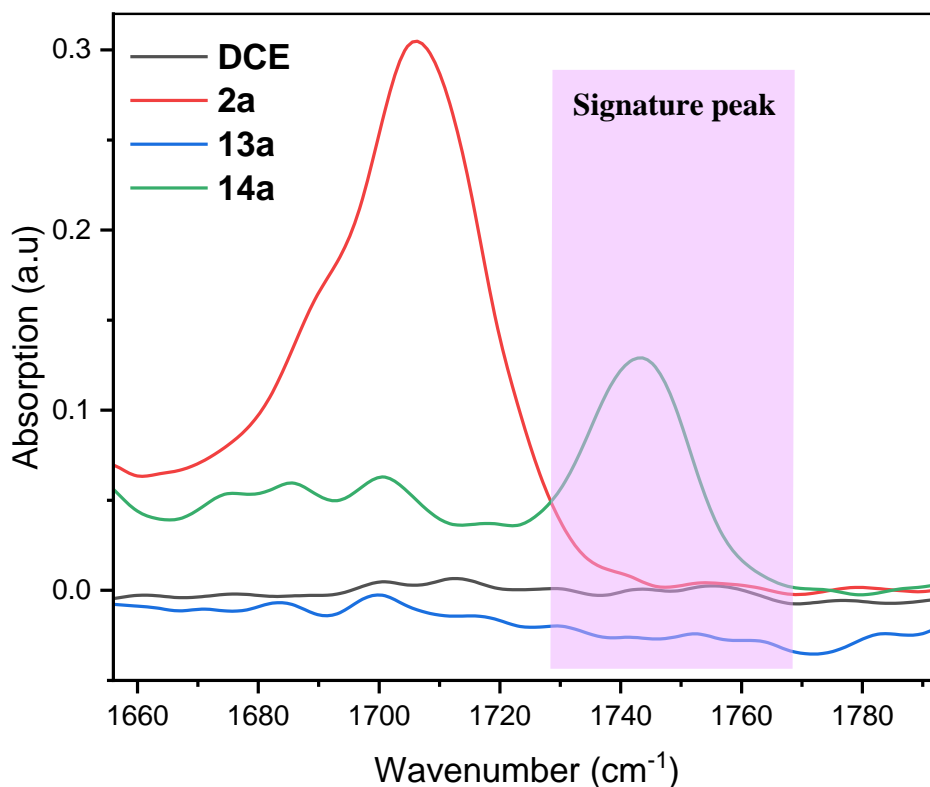

**Figure S44.** In-line IR background analysis of DCE, 0.5 M stock solution of **2a**, **13a**, and **14a** in DCE.

The distinctive shifting peak associated with product (**14a**) aligning within the range of 1730 to 1770  $\text{cm}^{-1}$ . This specific peak, falling within this range, is designated as the signature peak for our analysis. During the optimization of the reaction through Bayesian methods, this signature peak serves as a pivotal reference point. We utilize it to calculate the area under the curve in the In-line FT-IR spectra, providing a quantitative measure of the area in the forthcoming reaction mixture.

### **S8.2. General procedure for the auto-optimized synthesis of compound 14a.**

In our approach we are employing a Python-coded based Bayesian optimization strategy for further refinement. Initial steps involved the preparation of stock solutions for compound **2a**

(0.1 M in DCE) and reagent **13a** (0.2 M in DCE), each filled into separate syringes and connected to a syringe pump. The solutions were then directed through a PFA tubular reactor (inner diameter = 1 mm, length = 1.3 m, volume = 1 mL) surrounded by a cylindrical-shaped blue LED light source. Once the solution setup was complete, input ranges for variable flow rates, voltages, and current were specified in the Python code designed for the reaction. The Bayesian optimizer systematically explored these varying reaction conditions, aiming to achieve maximum yield. The optimization process involved running 40-45 experiments and the results were tabulated in the optimization table (Table S14).

### S8.2.1. Python code for optimized condition for N-C-O bond formation, (oxazole)

```
ab6.py
1 from os import listdir
2 from os.path import isfile, join
3 import serial
4
5 import numpy as np
6 import pandas as pd
7 import time
8 from scipy.integrate import trapz
9
10 #step1: be sure to the address of the files that the ftir data is exported is matching to line 11 (mypath)
11 mypath = "C:\\Users\\Admin\\Desktop\\ruchi\\Exp 2024-03-02 14-49"
12 onlyfiles = [f for f in listdir(mypath) if isfile(join(mypath, f))]
13
14
15 #step2: make sure that pump and the potentiostat is correctly addressed in the line 16 and 17
16 pump_1 = serial.Serial("COM4",9600) #Harvard Pump
17 port = serial.Serial("COM1",115200)
18 printer = serial.Serial("COM9", 115200, timeout=1)
19
20
21
22 #step 3: grab the lines from 22 to 90 and press f9
23 def area_under(data,start,end):
24     x = np.flip(data.iloc[start:end,0].to_numpy())
25     y = np.flip(data.iloc[start:end,1].to_numpy())
26     area = trapz(y,x)
27     return np.abs(area)
28
29 def file_namer(num):
30     str1 = str(num)
31     length = int(len((str1)))
32     empt = ''
33     for i in range(5-length):
34         empt = empt+'0'
35
36     return empt+str1
37
38
39 def ftir_extract(filename,init,end):
40
41     filename = filename
42
43     temp_df = pd.read_csv(filename)
44     # nump_df = temp_df.to_numpy()
45     area = area_under(temp_df, init, end)
46     # max_peak = np.max(nump_df[90:120,1])
47     print(area)
```

```

48
49     return area
50
51
52 def function(flowrate_1,v,i):
53
54     #set the pumps with the flowrate as the desired flowrate for the function
55
56     fr_1 = flowrate_1 #ml/min
57     pump_1.write(('irate '+str(fr_1)+' ml/min\r\n').encode())
58
59     time.sleep(0.1)
60
61     #set the com port for potentiostat and set the voltage and current
62     vol = v
63     curr = i
64     port.write(('VOLT '+str(vol)+'\r\n').encode()) #to change the voltage we need to use "VOLT 1" command
65     port.write(('CURR '+str(curr)+'\r\n').encode()) #to change the current we need to use "CURR 1" command
66
67
68     #pumps run
69     pump_1.write((b'irun\r\n'))
70     time.sleep(0.1)
71     time.sleep(1000)
72
73 def function2(flowrate_1,v,i):
74     time.sleep(1400)
75
76     files = [f for f in listdir(mypath) if isfile(join(mypath, f))]
77
78     val = 0
79
80     #change wavelengths as per product here.
81     f_row=15 #first row of range for wavelength as per IR CSV
82     l_row=25 #last row of range for wavelength as per IR CSV
83
84     val += ftir_extract(files[-1],f_row,l_row)
85     val+=ftir_extract(files[-2],f_row,l_row)
86     val+=ftir_extract(files[-3],f_row,l_row)
87
88     avg_val = val/3
89
90     return avg_val
91
92
93 #step 4:grab the line 93 and f9
94 from skopt.optimizer import Optimizer

```

```

95
96
97 #step5:in line 96 we have to define the range that (flowrate,voltage,current) (from,to) and after (anytime) applying changes you need to grab the line 96 and f9
98 #flowrates are in ml/min, voltage in V, Current in Ampere
99 bounds = [(0.05,0.150),(10.0,14.5),(4.9,5.0)]
100
101
102 #step 6: grab the line 100 and f9
103 opter =Optimizer(bounds,base_estimator='gp',n_initial_points=3,acq_func="EI",random_state=np.random.randint(3326))
104
105
106 #step7: to selecte number of the cycles that you have to do the experiment and then grab the line 104 to 121 and f9: the closed loop experimentation is initiated
107 number_of_cycles = 22
108 results = []
109 flowrates_1 = []
110 vs = []
111 currents = []
112
113 product_wavelength=True #set to true if product wavelengths being monitored
114
115 if product_wavelength == True:
116     val=1
117 else:
118     val=-1
119
120
121 # Step 8: Test Tubes on Printer
122 USE_PRINTER = True
123 REST_HEIGHT = 200
124 X_HOME = -5
125 Y_HOME = 20
126 Z_HOME = 175
127 DEFAULT_PUMP_TIME="1"
128 # Distance between test tubes
129 X_SPACING=20
130 Y_SPACING=20
131 # Number of test tubes
132 X_ROWS = 11
133 Y_COLUMNS = 4
134
135 def send_cmd(cmd):
136     print(cmd)
137     printer.write(f"{cmd}\n".encode("ASCII"))
138
139 def move(x=None, y=None, z=None):

```

```

140 s = "G0"
141 if x is not None:
142     s += f"X{x}"
143 if y is not None:
144     s += f"Y{y}"
145 if z is not None:
146     s += f"Z{z}"
147
148 s+= "F5000"
149 send_cmd(s)
150
151 def printer_positions():
152     for j in range(Y_COLUMNS):
153         for i in range(X_ROWS):
154             if j%2==1:
155                 yield (X_HOME + (X_ROWS - 1 - i) * X_SPACING, Y_HOME + j * Y_SPACING, Z_HOME)
156             else:
157                 yield (X_HOME + i * X_SPACING, Y_HOME + j * Y_SPACING, Z_HOME)
158
159 # Run this.
160 tube_location = list(printer_positions())
161
162
163 for i in range(number_of_cycles):
164     move(*tube_location[2*i])
165     asked = opter.ask()
166     function(asked[0],asked[1],asked[2])
167     move(*tube_location[2*i+1])
168     told = function2(asked[0],asked[1],asked[2])
169
170     print(f"area under the curve in the round {i:.2f} = {told: .2f}")
171     opter.tell(asked, -told*val)
172     results.append(told)
173     flowrates_1.append(asked[0])
174     vs.append(asked[1])
175     currents.append(asked[2])
176
177     dict1 = {"flowrate_1":flowrates_1,"voltages":vs, "currents":currents,"area-results":results}
178     df2 = pd.DataFrame(dict1)
179     df2.to_csv("output round "+str(i)+".csv")
180
181
182
183 pump_1.write(b'stop\r\n')
184
185
186

```

**Table S14.** Auto-optimization table of carbene insertion reaction (N-C-O bond formation, oxazole).

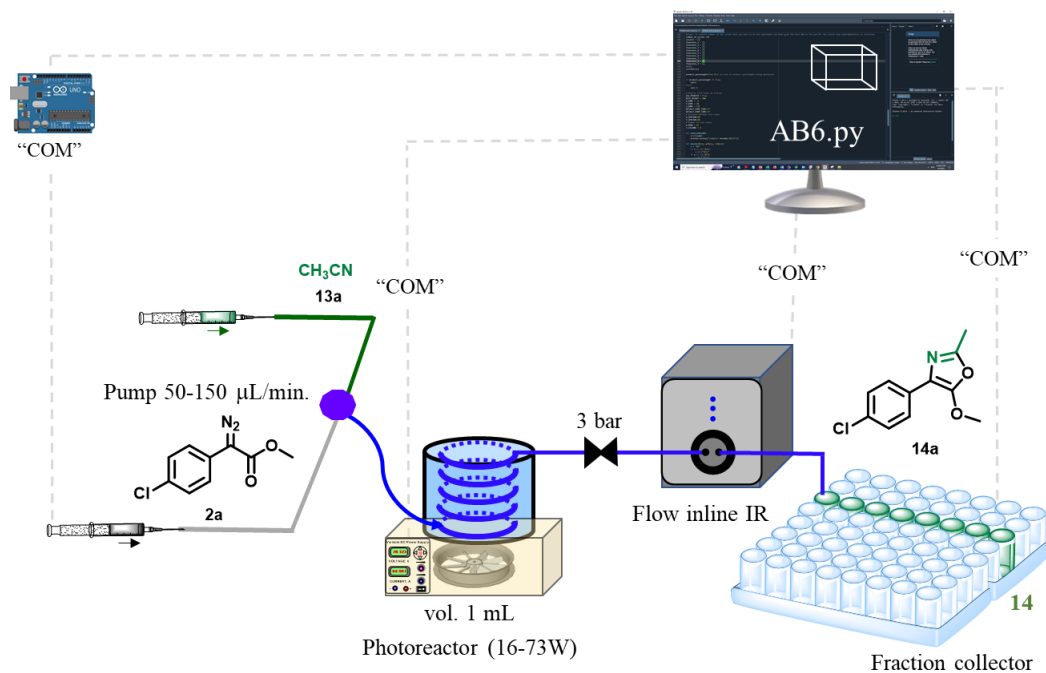

| No. of experiments | Flow rate mL/min | Voltage (V) | Light intensity (W) | area-results | Yield (%) | Space time yield (g mL <sup>-1</sup> h <sup>-1</sup> ) |
|--------------------|------------------|-------------|---------------------|--------------|-----------|--------------------------------------------------------|
| 1                  | 0.060718         | 12.40142    | 41.056              | 1.155747     | 66.97147  | 0.027204                                               |
| 2                  | 0.10674          | 10.77376    | 22.862              | 0.55897      | 32.39033  | 0.02313                                                |
| 3                  | 0.107843         | 10.36182    | 18.909              | 0.267647     | 15.50919  | 0.011189                                               |
| 4                  | 0.108263         | 10.79726    | 23.103              | 0.543014     | 31.46576  | 0.02279                                                |
| 5                  | 0.099346         | 10.72808    | 22.398              | 0.541964     | 31.40494  | 0.020873                                               |
| 6                  | 0.068879         | 10.66267    | 21.772              | 0.510561     | 29.58525  | 0.013633                                               |
| 7                  | 0.060402         | 14.4994     | 69.755              | 1.570414     | 91.00002  | 0.036772                                               |
| 8                  | 0.149805         | 14.34272    | 67.192              | 1.231955     | 71.38748  | 0.071544                                               |
| 9                  | 0.053698         | 14.13864    | 64.004              | 1.410356     | 81.72518  | 0.029359                                               |
| 10                 | 0.145992         | 13.77436    | 58.806              | 1.178274     | 68.27688  | 0.066685                                               |
| 11                 | 0.129902         | 14.38545    | 67.638              | 1.292653     | 74.90471  | 0.065096                                               |
| 12                 | 0.15             | 14.44019    | 68.469              | 1.252034     | 72.55097  | 0.072805                                               |
| 13                 | 0.13959          | 12.22695    | 38.597              | 0.937301     | 54.31332  | 0.050721                                               |
| 14                 | 0.147351         | 14.00744    | 62.093              | 1.237856     | 71.72945  | 0.07071                                                |
| 15                 | 0.070144         | 14.49956    | 69.252              | 1.496397     | 86.71099  | 0.04069                                                |

|           |                 |                 |               |                |                 |                 |
|-----------|-----------------|-----------------|---------------|----------------|-----------------|-----------------|
| 16        | 0.15            | 12.64771        | 44.051        | 1.159221       | 67.17278        | 0.067408        |
| 17        | 0.141495        | 14.42064        | 16.392        | 0.123688       | 7.167289        | 0.006785        |
| 18        | 0.15            | 14.47181        | 68.795        | 1.170652       | 67.83517        | 0.068073        |
| 19        | 0.05            | 14.30231        | 66.266        | 1.542238       | 89.36728        | 0.029893        |
| 20        | 0.060666        | 14.03974        | 62.491        | 1.458827       | 84.53391        | 0.034309        |
| 21        | 0.146306        | 13.80666        | 59.163        | 1.196568       | 69.33694        | 0.067866        |
| 22        | 0.053558        | 13.26608        | 51.711        | 1.147437       | 66.48996        | 0.023824        |
| 23        | 0.101353        | 12.36236        | 40.263        | 0.970972       | 56.26446        | 0.03815         |
| 24        | 0.111683        | 10.08164        | 68.24         | 1.389288       | 80.50436        | 0.06015         |
| 25        | 0.050659        | 14.27468        | 66.303        | 1.43998        | 83.44181        | 0.028279        |
| 26        | 0.05            | 10.52857        | 20.456        | 0.350086       | 20.28625        | 0.006786        |
| 27        | 0.05            | 15              | 73.955        | 1.561132       | 90.46212        | 0.03026         |
| 28        | 0.15            | 13.76539        | 58.639        | 1.178978       | 68.31763        | 0.068557        |
| 29        | 0.063485        | 10.41661        | 19.403        | 0.406903       | 23.57859        | 0.010014        |
| 30        | 0.139424        | 10.02272        | 15.941        | 0.291171       | 16.87234        | 0.015738        |
| <b>31</b> | <b>0.062383</b> | <b>14.73195</b> | <b>70.464</b> | <b>1.57821</b> | <b>91.45174</b> | <b>0.038167</b> |
| 32        | 0.082665        | 14.57888        | 70.718        | 1.457362       | 84.44903        | 0.046703        |
| 33        | 0.064109        | 14.40021        | 67.925        | 1.564911       | 90.68111        | 0.038892        |
| 34        | 0.146834        | 10.72916        | 22.411        | 0.51166        | 29.64892        | 0.029125        |
| 35        | 0.05799         | 14.59723        | 70.971        | 1.55543        | 90.13171        | 0.034967        |
| 36        | 0.077781        | 14.85116        | 74.015        | 1.550575       | 89.85043        | 0.046754        |
| 37        | 0.149019        | 10.96034        | 24.693        | 0.691132       | 40.04866        | 0.039926        |
| 38        | 0.06201         | 14.99412        | 73.149        | 1.543011       | 89.4121         | 0.037092        |
| 39        | 0.09372         | 13.86823        | 60.073        | 1.510841       | 87.54798        | 0.054892        |
| 40        | 0.060974        | 14.27468        | 66.303        | 0.979244       | 56.74375        | 0.023147        |
| 41        | 0.064852        | 14.76182        | 73.203        | 1.320306       | 76.50714        | 0.033193        |
| 42        | 0.13607         | 13.16311        | 50.48         | 0.771156       | 44.68577        | 0.040678        |
| 43        | 0.053277        | 10.40976        | 19.38         | 0.261369       | 15.14544        | 0.005398        |
| 44        | 0.147724        | 10.71269        | 22.349        | 0.495395       | 28.70643        | 0.02837         |

**Reaction condition:** compound **2a** (0.1 M in DCE); reagent **13a** (0.2 M in DCE); 1 mL reactor volume.



**Graph:**

We have plotted 3D graph of optimization table S14, we have taken flow rate on X-axis, blue light intensity (watt) on Y-axis and product yield on Z axis.

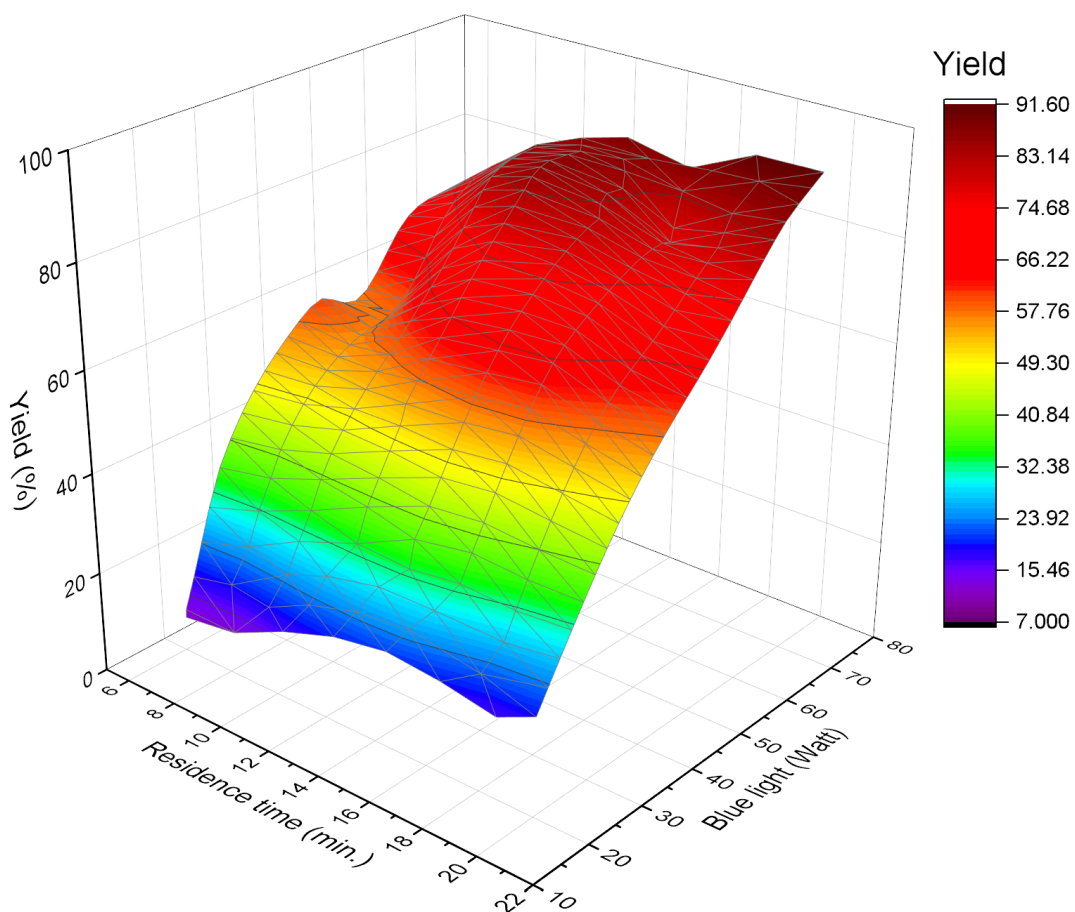

**Figure S45.** AI based system to auto-optimize and navigate this complexity and identify the optimal conditions for the photo activated [3+2] cycloaddition reaction. Compound **2a** (0.1 M in DCE); reagent **13a** (0.2 M in DCE); 1 mL reactor volume.

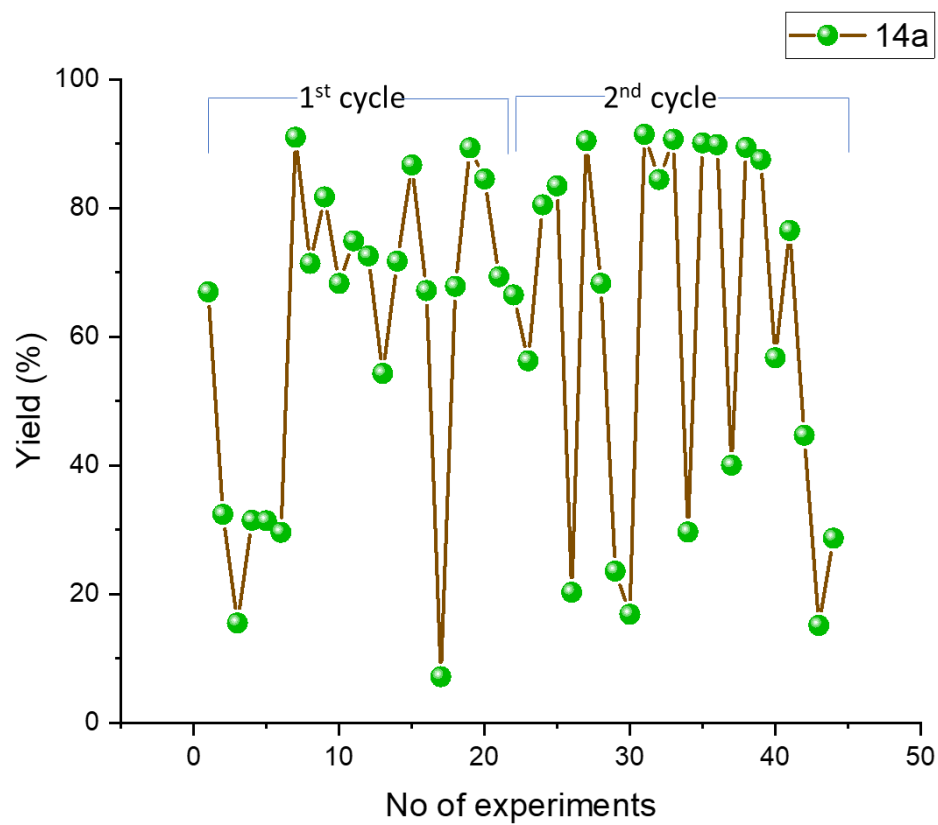

**Figure S46.** 2D graph between no of experiments performed versus yield (%) for the AI based auto-optimization of photo activated [3+2] cycloaddition reaction. Compound **2a** (0.1 M in DCE); reagent **13a** (0.2 M in DCE); 1 mL reactor volume.

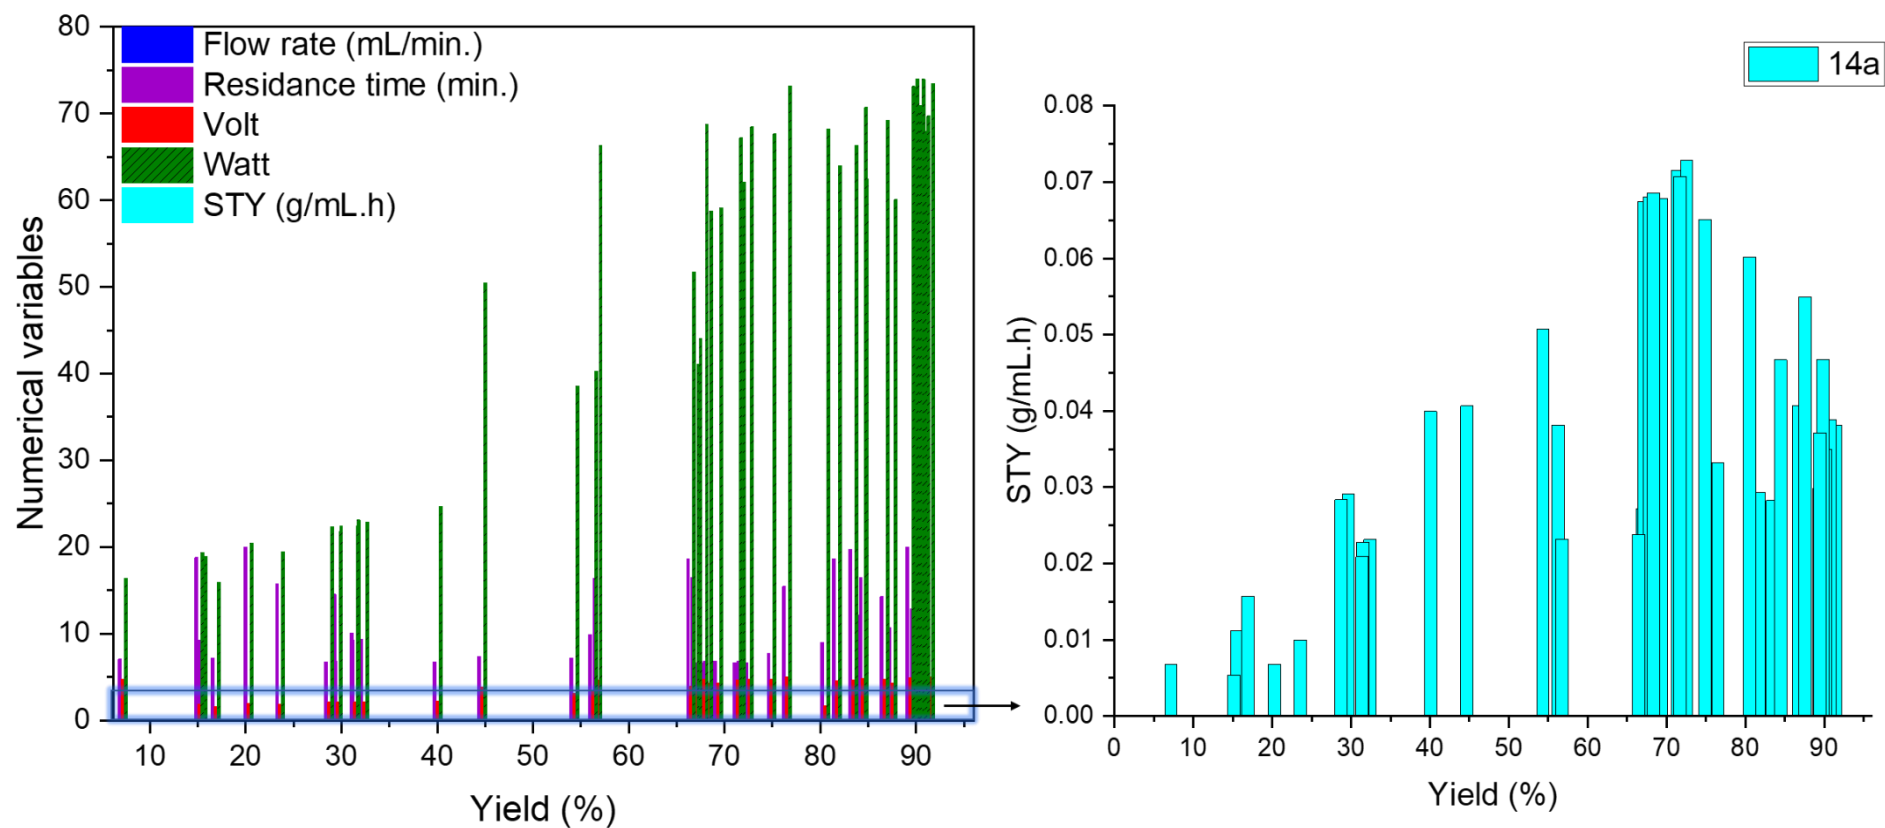

**Figure S47.** AI based system navigated multi-numerical variable complexity and identify the optimal conditons for the photo activated [3+2] cycloaddition reaction. Compound **2a** (0.1 M in DCE); reagent **13a** (0.2 M in DCE); 1 mL reactor volume.

**S.8.3. General procedure for AI optimized carbene insertion into the triple bonds of  $C\equiv N$  for synthesis of compound 14a.**

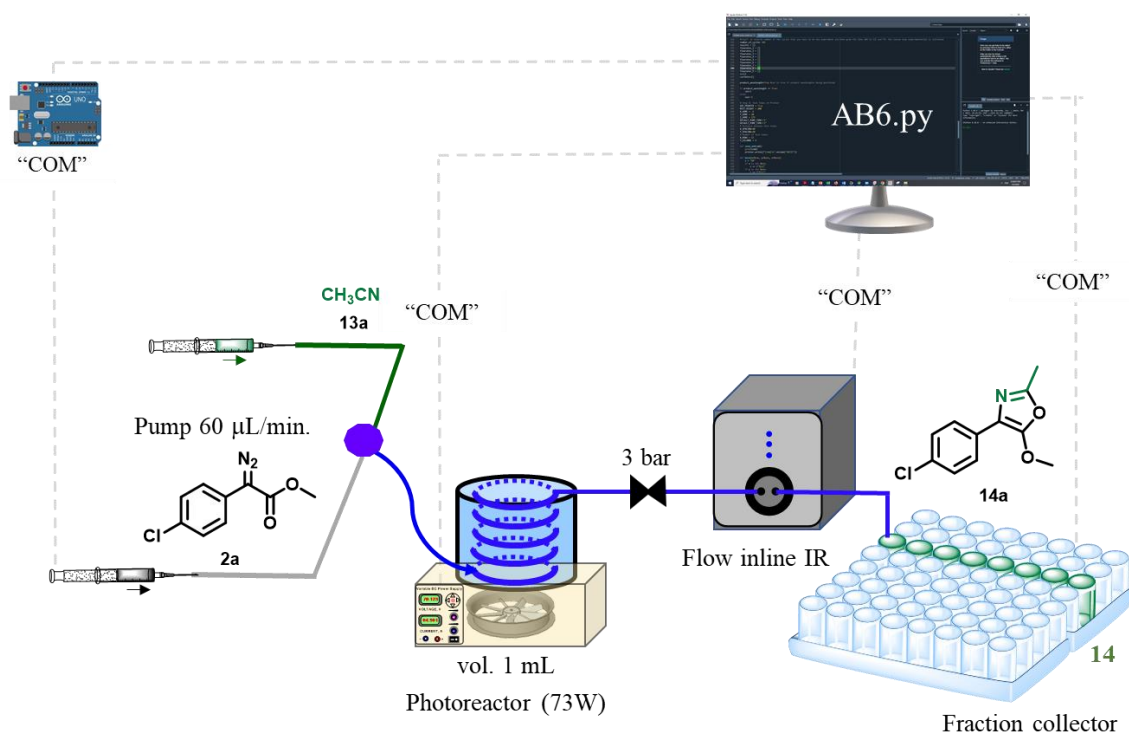

**Figure S48.** Schematic presentation of continuous flow for the synthesis, of compound **14a**.

To prepare the stock solution of compound **2a** (2.20 g, 0.01 mol) was dissolved in DCE (100 mL) and connected with pump. Another pump was connected with the reagent **13a** (1.09 mL, 0.026 mol) dissolved in DCE (100 mL). These two pump out-put is further connected with the T<sub>1</sub>-mixer and pumps were running with the flow rate 31 µL/min. each to maintain the stoichiometry and then passed through PFA tubular reactor (inner diameter = 1 mm, length = 1.3 m, volume = 1 mL) under blue light (73.464 W) exposure. The room temperature of the reactor was controlled by fan attached to the bottom of the photochemical reactor. The out-put of the tubular reactor was connected with spring based back pressure regulator (~3 bar) to maintain the evaporation. First one hour of the product mixture was discarded and next 5 h of the product mixture [18.6 mL; **2a** (0.195 g)] was collected in HPLC bottle. The organic EtOAc phase was concentrated under reduced pressure to give the product **13a** (0.190g in 5 h, 91%)

as a colourless oil. **<sup>1</sup>H NMR (500 MHz, CDCl<sub>3</sub>)** δ 7.70 – 7.67 (m, 2H), 7.32 – 7.30 (m, 2H), 4.00 (s, 3H), 2.38 (s, 3H). **<sup>13</sup>C NMR (126 MHz, CDCl<sub>3</sub>)** δ 154.28, 151.75, 131.56, 130.07, 129.22, 128.56, 126.01, 113.27, 59.84, 14.11. **IR (ν<sub>max</sub>):** 3019.92, 1741.94, 1646.73, 1214.78, 1013.60, 745.47 cm<sup>-1</sup>. **HRMS (ESI):** *m/z* calcd for C<sub>11</sub>H<sub>11</sub>ClNO<sub>2</sub> [M+H]<sup>+</sup> 224.0473, found 224.0451. Verified the analytical data with those reported in the literature.<sup>21</sup>

### Space time yield in previous reported batch process <sup>21</sup>

Productivity = 39.8 mg in 24 h

$$\text{Productivity (per h)} := \frac{0.39}{24} = 0.0016 \text{ g/h}$$

$$\text{Space time yield} := \frac{\text{productivity}}{\text{volume of reactor}}$$

$$= \frac{0.0016}{1} = 0.0016 \text{ g mL}^{-1} \text{ h}^{-1}$$

**Table S15.** Comparative result for the carbene insertion (N-C-O bond formation, oxazole).

| Entry | Compound 2a                                                                         | Reagent 13a        | Product 14a                                                                         | Comparative result                                                                                                                                                                                |
|-------|-------------------------------------------------------------------------------------|--------------------|-------------------------------------------------------------------------------------|---------------------------------------------------------------------------------------------------------------------------------------------------------------------------------------------------|
| 1     | 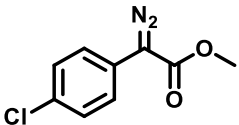 | CH <sub>3</sub> CN |  | 91.4%, 16.6 min. (our study)<br>Blue LED, RVC (+), Pt (-),<br>1.5 h, 88%<br><sup>22</sup><br>Et <sub>3</sub> SiCl, Blue LED, 8 h,<br>83%<br><sup>23</sup><br>Blue LED, 24 h, 89%<br><sup>21</sup> |

## **S9. Case study-7: Carbene insertion (C=C bond formation, fumarate) single objective multi-variant auto-optimization.**

### **S9.1 Background collection**

**Sample Preparation:** We prepare 0.5 M stock solution of compound **2a** in DCE, 0.5 M stock solution of reagent **15** in DCE and 0.5 M stock solution of product **16a** in DCE. The three of the solution taken in three different syringes.

To conduct our analysis, we utilized an In-line FTIR system. The experimental protocol involved the initial introduction of the solvent, DCE, for a duration of 10 min. using a syringe pump, during which data was recorded. Subsequently, a previously prepared stock solution of compound **2a** was similarly introduced into the In-line FTIR for 10 min. This process was repeated for the reaction product **16a** and reagent **15**, each pumped for 10 min. Upon collecting all relevant data, we identified the signature peak present in the product. Using this peak as a reference, we employed a Bayesian optimizer to fine-tune and optimize the reaction conditions for improved results.

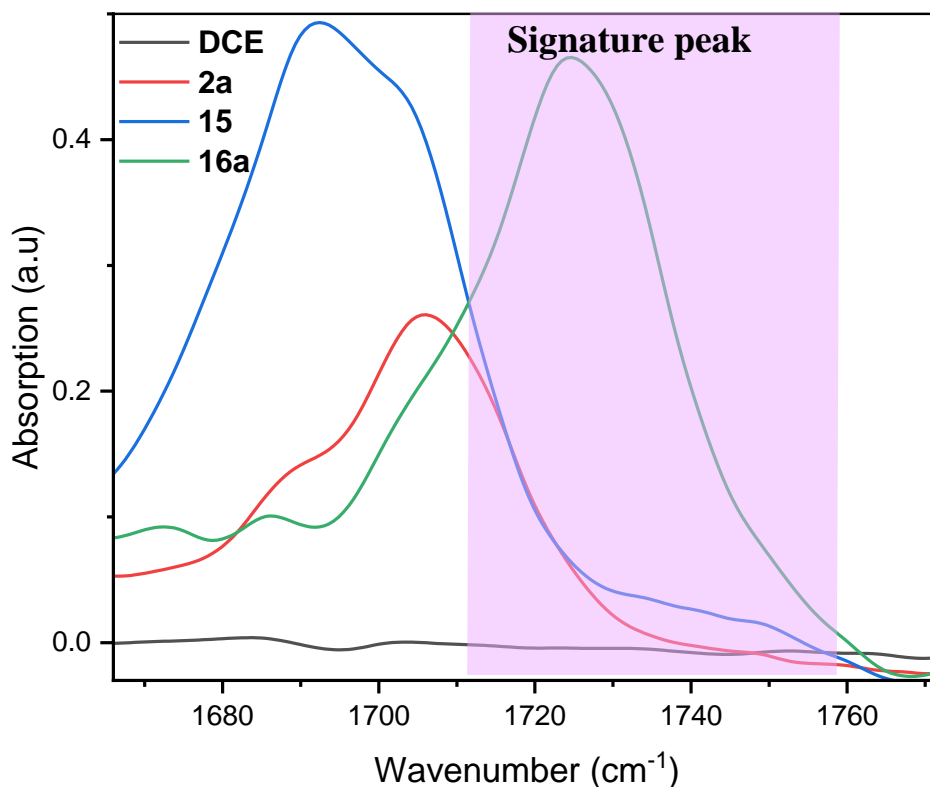

**Figure. S49.** In-line IR background analysis of DCE, 0.5 M stock solution of **1a**, **15a**, and **16a** in DCE.

The distinctive shifting peak associated with product (**16a**) aligning within the range of 1715 to 1760  $\text{cm}^{-1}$ . This specific peak, falling within this range, is designated as the signature peak for our analysis. During the optimization of the reaction through Bayesian methods, this signature peak serves as a pivotal reference point. We utilize it to calculate the area under the curve in the In-line FT-IR spectra, providing a quantitative measure of the area in the forthcoming reaction mixture.

### **S8.2. General procedure for the auto-optimized synthesis of compound 16a.**

Initial steps involved the preparation of stock solutions for compound **2a** (0.1 M in DCE) and reagent **15** (0.1 M in DCE), each filled into separate syringes and connected to a syringe pump.

The solutions were then directed through a PFA tubular reactor (inner diameter = 1 mm, length = 1.3 m, volume = 1 mL) surrounded by a cylindrical-shaped blue LED light source. Once the solution setup was complete, input ranges for variable flow rates, voltages, and current were specified in the Python code designed for the reaction. The Bayesian optimizer systematically explored these varying reaction conditions, aiming to achieve maximum yield. The optimization process involved running 40-45 experiments and the results were tabulated in the optimization table (Table S16).



### S8.2.1. Python code for optimized condition for C=C bond formation, fumarate

```
ab7.py
1 from os import listdir
2 from os.path import isfile, join
3 import serial
4
5 import numpy as np
6 import pandas as pd
7 import time
8 from scipy.integrate import trapz
9
10 #step1: be sure to the address of the files that the ftir data is exported is matching to line 11 (mypath)
11 mypath = "C:\\Users\\Admin\\Desktop\\ruchi\\Exp 2024-03-06 13-11"
12 onlyfiles = [f for f in listdir(mypath) if isfile(join(mypath, f))]
13
14 #step2: make sure that pump and the potentiostat is correctly addressed in the Line 16 and 17
15 pump_1 = serial.Serial("COM17",9600) #Syringe Pump
16 port = serial.Serial("COM1",115200)
17 printer = serial.Serial("COM9", 115200, timeout=1)
18
19 r_1=13.36 #radius of syringe used (50ml,14.25|20ml,9.6|10ml,7.25|5ml,6.03|3ml,4/3|1ml,2.39|60ml,13.36)
20 pump_1_k=(13.36/r_1)**2
21
22 #step 3: grab the lines from 22 to 90 and presss f9
23 def area_under(data,start,end):
24     x = np.flip(data.iloc[start:end,0].to_numpy())
25     y = np.flip(data.iloc[start:end,1].to_numpy())
26     area = trapz(y,x)
27     return np.abs(area)
28
29 def file_namer(num):
30     str1 = str(num)
31     length = int(len((str1)))
32     empt = ''
33     for i in range(5-length):
34         empt = empt+'0'
35
36     return empt+str1
37
38
39 def ftir_extract(filename,init,end):
40
41     filename = filename
42
43     temp_df = pd.read_csv(filename)
44     # nump_df = temp_df.to_numpy()
45     area = area_under(temp_df, init, end)
46     # max_peak = np.max(nump_df[90:120,1])
47     print(area)
```

```

48
49     return area
50
51
52 def function(flowrate_1,v,i):
53
54     #set the pumps with the flowrate as the desired flowrate for the function
55
56     fr_1 = flowrate_1*1000*pump_1_k #mL/min to microliter/min and syringe correction factor
57     send_syr_command(f'fr{fr_1}')
58     time.sleep(0.1)
59
60     #set the com port for potentiostat and set the voltage and current
61     vol = v
62     curr = i
63     port.write(('VOLT '+str(vol)+'\r\n').encode()) #to change the voltage we need to use "VOLT 1" command
64     port.write(('CURR '+str(curr)+'\r\n').encode()) #to change the current we need to use "CURR 1" command
65
66
67     #pumps run
68     time.sleep(0.1)
69     time.sleep(20)
70
71 def function2():
72     time.sleep(20)
73
74     files = [f for f in listdir(mypath) if isfile(join(mypath, f))]
75
76     val = 0
77
78     #change wavelengths as per product here.
79     f_row=11 #first row of range for wavelength as per IR CSV
80     l_row=15 #last row of range for wavelength as per IR CSV
81
82     val += ftir_extract(files[-1],f_row,l_row)
83     val+=ftir_extract(files[-2],f_row,l_row)
84     val+=ftir_extract(files[-3],f_row,l_row)
85
86     avg_val = val/3
87
88     return avg_val
89
90
91 #step 4:grab the line 93 and f9
92 from skopt.optimizer import Optimizer
93
94

```

```

95 def send_syr_command(command):
96     pump_1.write(command.encode() + b'\n') # Send the command to Arduino with a newline character
97     pump_1.flush() # Flush the serial buffer
98
99
100 #step5:in line 96 we have to define the range that (flowrate,voltage,current) (from,to) and after (anytime) appling changes you need to grab the line 96 and f9
101 #flowrates are in ml/min, voltage in V, Current in Ampere
102 bounds = [(0.05,0.15),(10.0,14.5),(0.0,5.0)]
103
104 #step 6: grab the line 100 and f9
105 opter =Optimizer(bounds,base_estimator='gp',n_initial_points=3,acq_func="EI",random_state=np.random.randint(3326))
106
107
108 #step7: to selecte number of the cycles that you have to do the experiment and then grab the line 104 to 121 and f9: the closed loop experimentation is initiated
109 number_of_cycles = 22
110 results = []
111 flowrates_1 = []
112 vs = []
113 currents = []
114
115 product_wavelength=True #set to true if product wavelengths being monitored
116
117 if product_wavelength == True:
118     val=1
119 else:
120     val=-1
121
122
123 # Step 8: Test Tubes on Printer
124 USE_PRINTER = True
125 REST_HEIGHT = 200
126 X_HOME = -5
127 Y_HOME = 20
128 Z_HOME = 175
129 DEFAULT_PUMP_TIME="1"
130 # Distance between test tubes
131 X_SPACING=20
132 Y_SPACING=20
133 # Number of test tubes
134 X_ROWS = 11
135 Y_COLUMNS = 4
136
137 def send_cmd(cmd):
138     print(cmd)
139     printer.write(f"{cmd}\n".encode("ASCII"))
140

```

```

141 def move(x=None, y=None, z=None):
142     s = "G0"
143     if x is not None:
144         s += f"X{x}"
145     if y is not None:
146         s += f"Y{y}"
147     if z is not None:
148         s += f"Z{z}"
149
150     s += "F5000"
151     send_cmd(s)
152
153 def printer_positions():
154     for j in range(Y_COLUMNS):
155         for i in range(X_ROWS):
156             if j%2==1:
157                 yield (X_HOME + (X_ROWS - 1 - i) * X_SPACING, Y_HOME + j * Y_SPACING, Z_HOME)
158             else:
159                 yield (X_HOME + i * X_SPACING, Y_HOME + j * Y_SPACING, Z_HOME)
160
161 # Run this.
162 tube_location = list(printer_positions())
163
164 time.sleep(2)
165
166 for i in range(number_of_cycles):
167     move(*tube_location[2*i])
168     asked = opter.ask()
169     print (asked[0])
170     function(asked[0],asked[1],asked[2])
171     move(*tube_location[2*i+1])
172     told = function2()
173
174     print(f"area under the curve in the round {i:.2f} = {told: .2f}")
175     opter.tell(asked,-told*val)
176     results.append(told)
177     flowrates_1.append(asked[0])
178     vs.append(asked[1])
179     currents.append(asked[2])
180
181     dict1 = {"flowrate_1":flowrates_1,"voltages":vs, "currents":currents,"area-results":results}
182     df2 = pd.DataFrame(dict1)
183     df2.to_csv("output round "+str(i)+".csv")
184
185
186
187 send_syr_command("stop")    #turns off syringe pump flow

```

**Table S16.** Auto-optimization table of cross coupling reaction (C=C bond formation, fumarate).

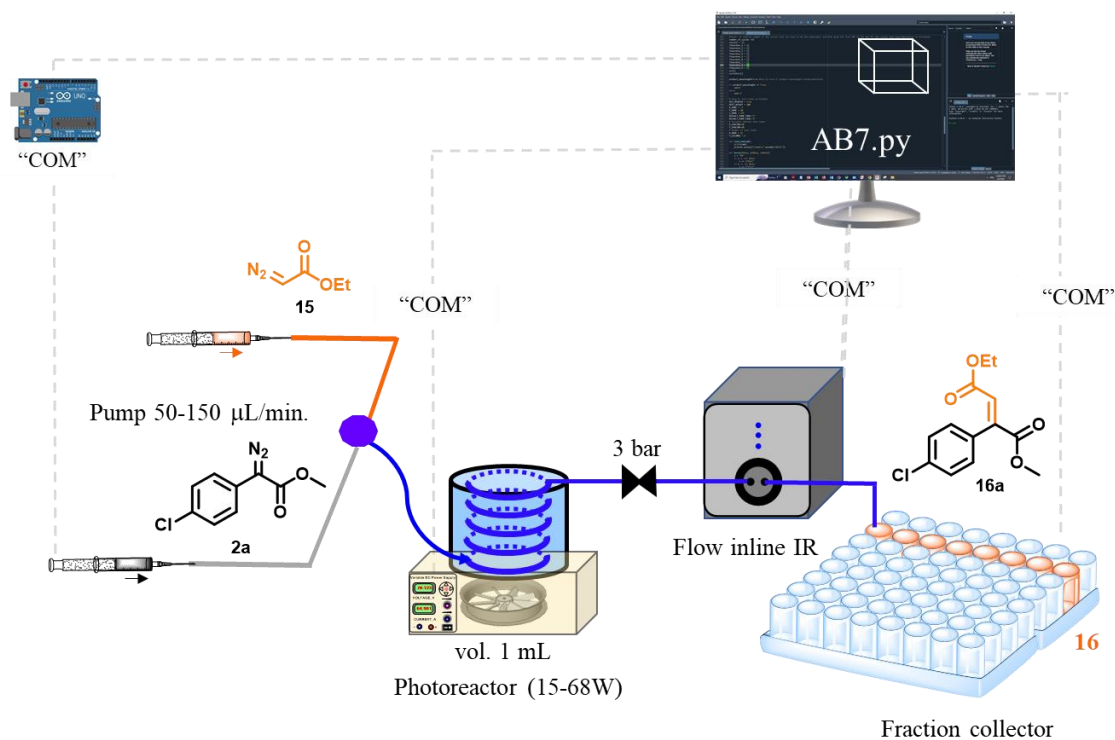

| No. of experiments | Flow rate mL/min | Voltage (V) | Light intensity (W) | area-results | Yield (%) | Space time yield (g mL <sup>-1</sup> h <sup>-1</sup> ) |
|--------------------|------------------|-------------|---------------------|--------------|-----------|--------------------------------------------------------|
| 1                  | 0.114805         | 11.92934    | 34.102              | 0.470179     | 36.42071  | 0.033618                                               |
| 2                  | 0.098673         | 12.30966    | 38.515              | 0.854069     | 66.1574   | 0.052485                                               |
| 3                  | 0.103371         | 11.69926    | 31.712              | 0.830144     | 64.3041   | 0.053443                                               |
| 4                  | 0.053233         | 14.41624    | 67.034              | 1.090795     | 84.49451  | 0.036163                                               |
| 5                  | 0.15             | 12.46267    | 41.012              | 0.60424      | 46.80531  | 0.056447                                               |
| 6                  | 0.136292         | 11.89984    | 34.436              | 0.627558     | 48.61151  | 0.053268                                               |
| 7                  | 0.0808           | 13.69994    | 57.96               | 1.106513     | 85.71207  | 0.055682                                               |
| 8                  | 0.070825         | 11.19236    | 26.491              | 0.542513     | 42.0238   | 0.02393                                                |
| 9                  | 0.052078         | 10.03053    | 15.605              | 0.349642     | 27.08376  | 0.01134                                                |
| 10                 | 0.109072         | 12.22021    | 37.699              | 0.508583     | 39.39557  | 0.034548                                               |
| 11                 | 0.100732         | 12.0365     | 35.578              | 0.421314     | 32.63555  | 0.026431                                               |
| 12                 | 0.114871         | 11.90975    | 34.56               | 0.456292     | 35.345    | 0.032643                                               |
| 13                 | 0.148623         | 14.25763    | 65.083              | 1.000345     | 77.48811  | 0.092593                                               |

|           |                 |                 |               |                 |                 |                 |
|-----------|-----------------|-----------------|---------------|-----------------|-----------------|-----------------|
| 14        | 0.053555        | 10.00233        | 15.532        | 0.192328        | 14.89802        | 0.006415        |
| 15        | 0.05            | 12.69937        | 44.027        | 0.739746        | 57.30175        | 0.023035        |
| 16        | 0.129758        | 11.12454        | 26.086        | 0.44318         | 34.32936        | 0.035814        |
| 17        | 0.123543        | 12.8464         | 45.873        | 0.795025        | 61.58378        | 0.06117         |
| 18        | 0.142808        | 11.61169        | 31.302        | 0.302434        | 23.42699        | 0.026898        |
| 19        | 0.080479        | 11.63094        | 31.389        | 0.381501        | 29.5516         | 0.019121        |
| <b>20</b> | <b>0.081458</b> | <b>14.41624</b> | <b>67.034</b> | <b>1.148959</b> | <b>88.99998</b> | <b>0.058288</b> |
| 21        | 0.065678        | 12.35186        | 39.644        | 0.714388        | 55.33753        | 0.029221        |
| 22        | 0.068097        | 12.28934        | 39.054        | 0.431773        | 33.44574        | 0.018311        |
| 23        | 0.094075        | 10.32873        | 18.363        | 0.20385         | 15.79052        | 0.011943        |
| 24        | 0.054858        | 12.70035        | 44.104        | 0.90043         | 69.74862        | 0.030763        |
| 25        | 0.132587        | 14.37057        | 66.907        | 0.816223        | 63.22577        | 0.067399        |
| 26        | 0.15            | 10              | 15.53         | 0.124816        | 9.668397        | 0.01166         |
| 27        | 0.149923        | 11.35554        | 28.524        | 0.250264        | 19.38581        | 0.023367        |
| 28        | 0.15            | 10              | 16.018        | 0.193638        | 14.99947        | 0.018089        |
| 29        | 0.15            | 10              | 16.018        | 0.19419         | 15.04221        | 0.018141        |
| 30        | 0.081458        | 14.32353        | 66.382        | 1.09276         | 84.64676        | 0.055437        |
| 31        | 0.14972         | 10.04417        | 15.585        | 0.164063        | 12.70858        | 0.015298        |
| 32        | 0.124635        | 14.5            | 68.203        | 0.653962        | 50.6568         | 0.050762        |
| 33        | 0.050661        | 10.01346        | 15.52         | 0.189311        | 14.6643         | 0.005973        |
| 34        | 0.148887        | 14.32353        | 66.382        | 0.96474         | 74.73017        | 0.089456        |
| 35        | 0.059379        | 10              | 15.499        | 0.156635        | 12.13321        | 0.005792        |
| 36        | 0.050761        | 11.45305        | 29.297        | 0.368252        | 28.5253         | 0.011642        |
| 37        | 0.052621        | 12.00522        | 35.367        | 0.75496         | 58.48026        | 0.024741        |
| 38        | 0.090012        | 10.00458        | 15.458        | 0.35354         | 27.38574        | 0.019819        |
| 39        | 0.079081        | 14.4398         | 67.541        | 1.03432         | 80.11992        | 0.050941        |
| 40        | 0.129892        | 10.00877        | 15.502        | 0.417781        | 32.3619         | 0.033797        |
| 41        | 0.080521        | 14.47602        | 68.587        | 1.140182        | 88.32009        | 0.057177        |
| 42        | 0.078882        | 10.02039        | 14.682        | 0.251696        | 19.4967         | 0.012365        |
| 43        | 0.094613        | 14.48282        | 68.427        | 1.068802        | 82.79091        | 0.062978        |
| 44        | 0.094114        | 14.49842        | 68.595        | 1.089417        | 84.38781        | 0.063854        |

**Reaction condition:** compound **2a** (0.1 M in DCE); reagent **15** (0.1 M in DCE); 1 mL reactor volume.

## Graphs:

We have plotted 3D graph of optimization table S16, we have taken flow rate on X-axis, blue light intensity (watt) on Y-axis and product yield on Z axis.

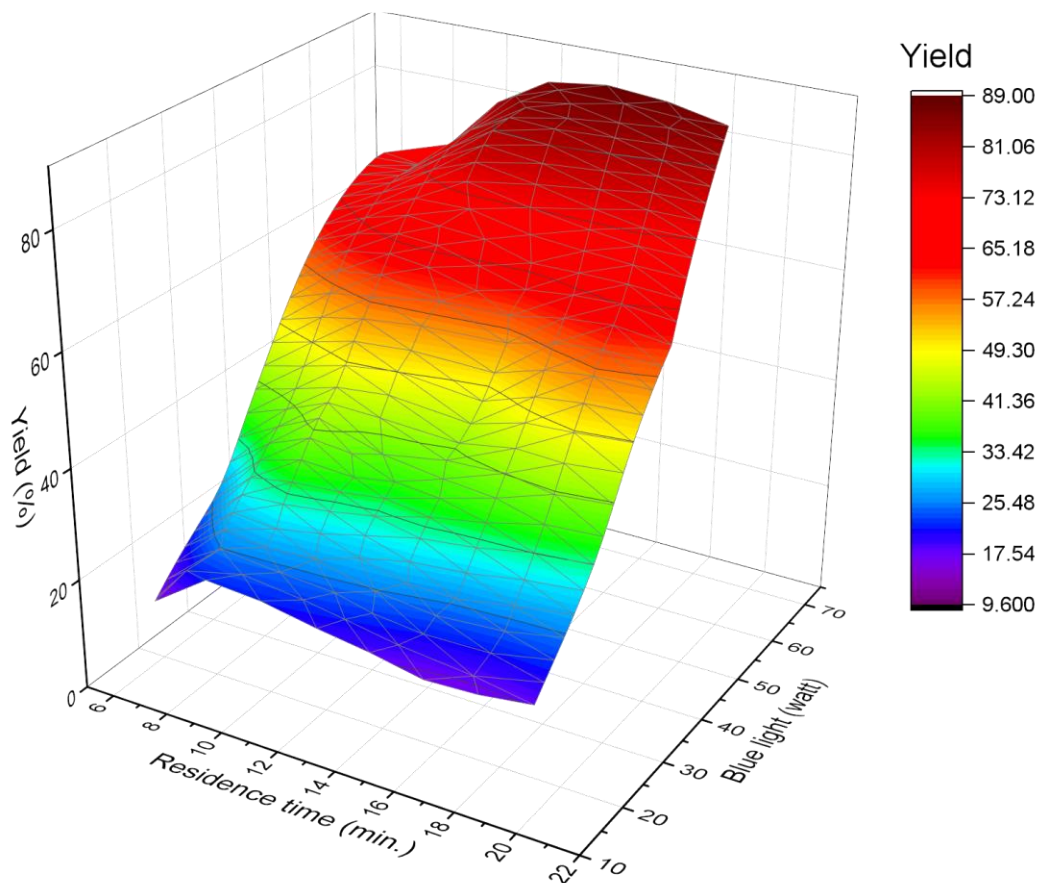

**Figure S50.** AI based system to auto-optimize and navigate this complexity and identify the optimal conditions for the photo activated cross-coupling reaction. Compound **2a** (0.1 M in DCE); reagent **15** (0.1 M in DCE); 1 mL reactor volume.

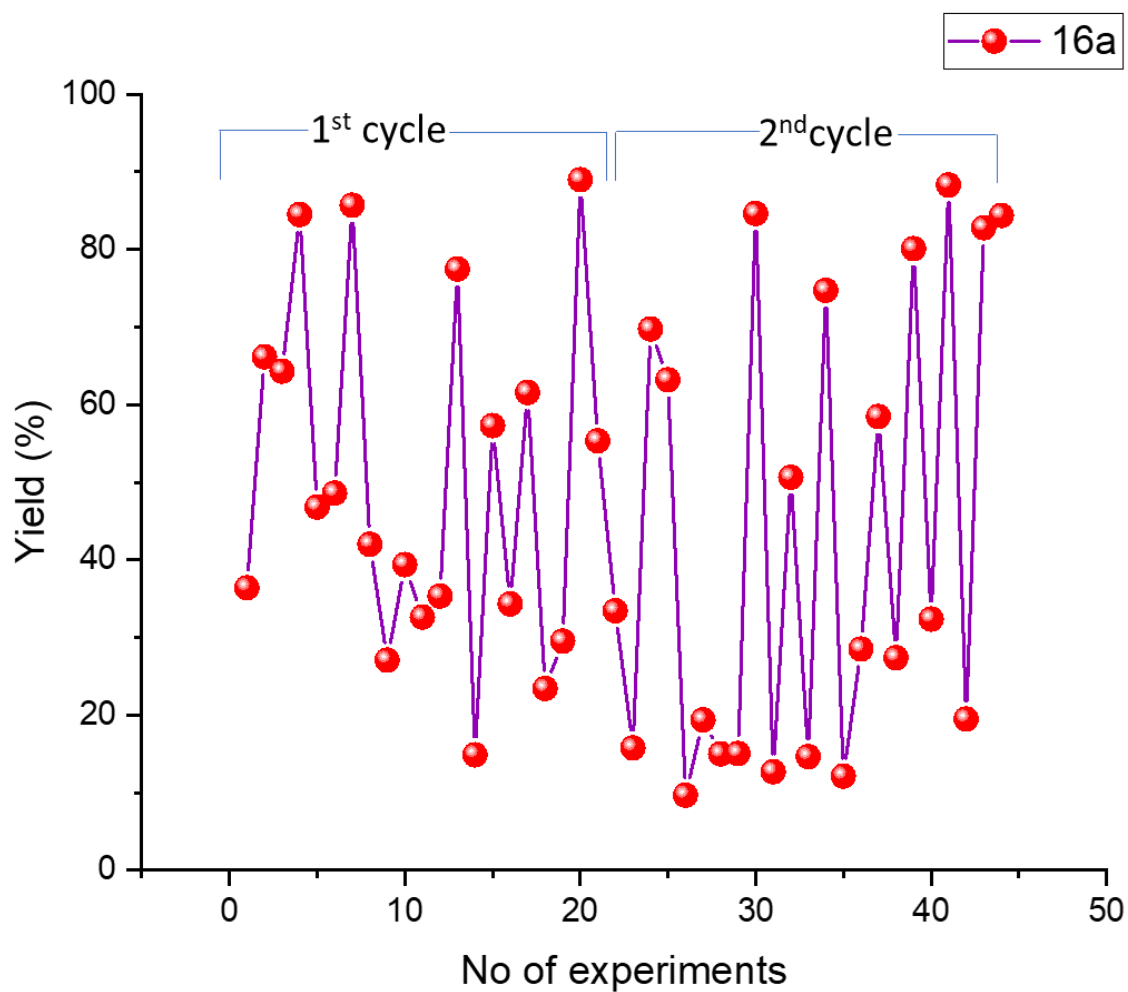

**Figure S51.** 2D graph between No of experiments performed versus Yield (%) for the AI based auto-optimization for the photo activated cross-coupling reaction. Compound **2a** (0.1 M in DCE); reagent **15** (0.1 M in DCE); 1 mL reactor volume.



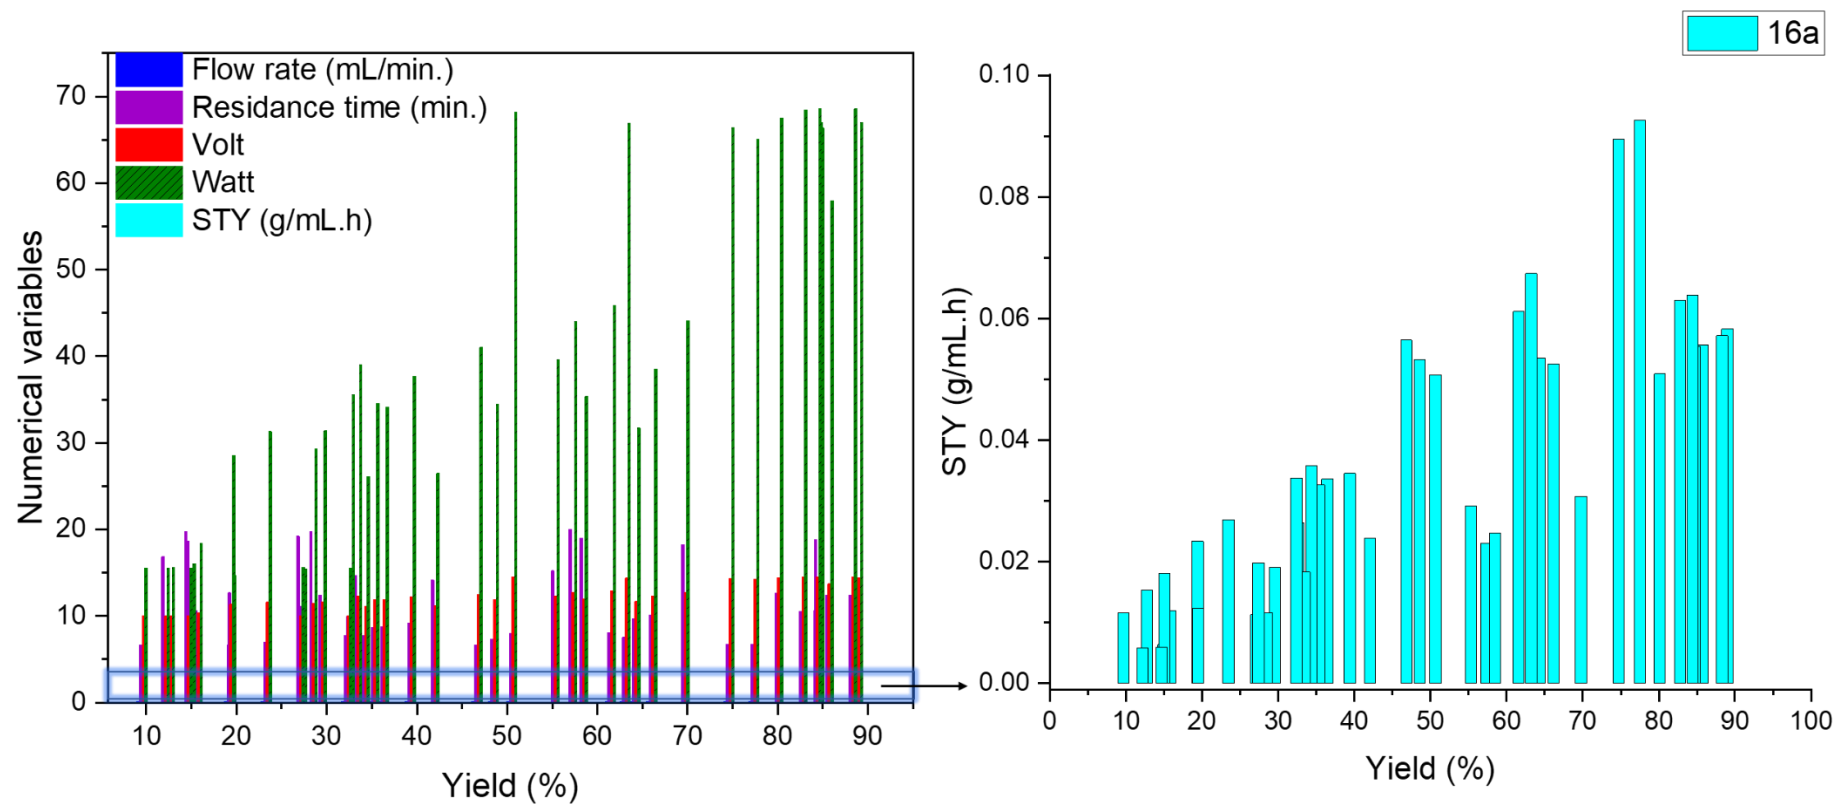

**Figure S52.** AI based system navigated multi-numerical variable complexity and identify the optimal condition for the photo activated cross-coupling reaction. Compound **2a** (0.1 M in DCE); reagent **15** (0.1 M in DCE); 1 mL reactor volume.

### S.8.3. General procedure for AI optimized cross coupling reaction of ethyl diazoacetate and aryldiazoester for synthesis of compound 16a.

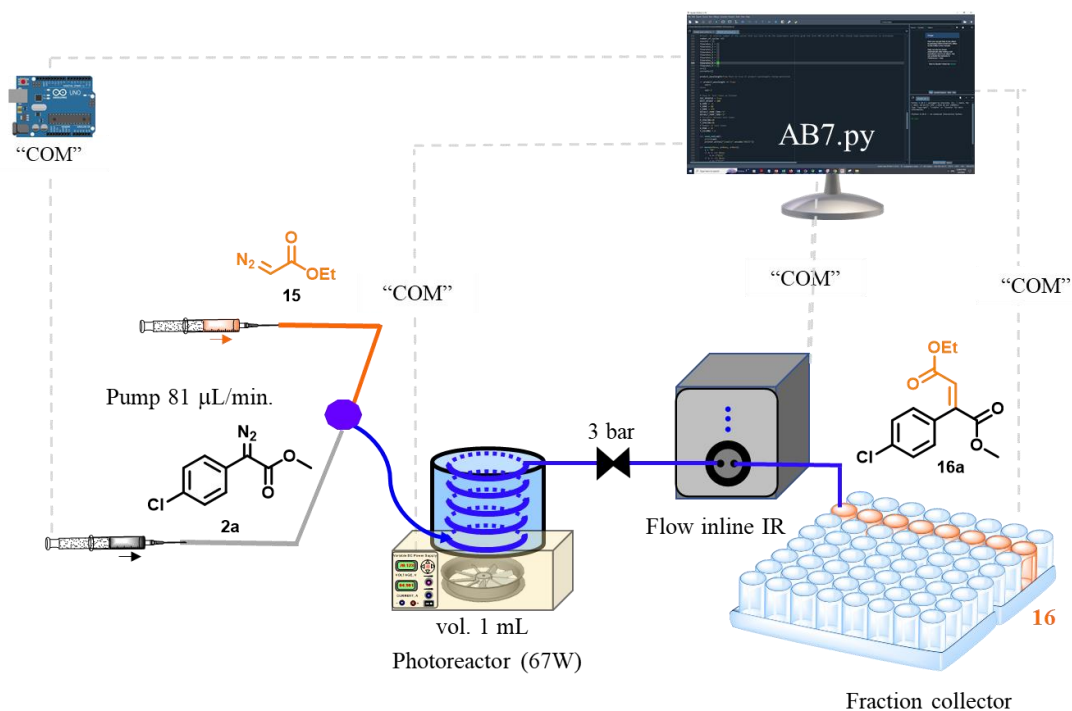

**Figure S53.** Schematic presentation of continuous flow for the synthesis, of compound **16**.

To prepare the stock solution of compound **2a** (2.20 g, 0.01 mol) was dissolved in DCE (100 mL) and connected with pump. Another pump was connected with the reagent **15** (1.32 mL, 0.01 mol) dissolved in DCE (100 mL). These two pump out-put is further connected with the T<sub>1</sub>-mixer and pumps were running with the flow rate 40 µL/min.each to maintain the stoichiometry and then passed through PFA tubular reactor (inner diameter = 1 mm, length = 1.3 m, volume = 1 mL) under blue light (67.034 W) exposure. The room temperature of the reactor was controlled by fan attached to the bottom of the photochemical reactor. The out-put of the tubular reactor was connected with spring based back pressure regulator (~3 bar) to maintain the evaporation. First one hour of the product mixture was discarded and next 5 h of the product mixture [24.3 mL; **2a** (0.255 g)] was collected in HPLC bottle. The organic EtOAc phase was concentrated under reduced pressure to give the product **16a** (0.29 g in 5 h, 89%) as

a colourless oil. **<sup>1</sup>H NMR (400 MHz, CDCl<sub>3</sub>)** δ 7.35–7.32 (m, 2H), 7.21–7.16 (m, 2H), 7.03 (s, 1H), 4.06 (q, *J* = 7.1 Hz, 2H), 3.79 (s, 3H), 1.10 (t, *J* = 7.1 Hz, 3H). **<sup>13</sup>C NMR (126 MHz, CDCl<sub>3</sub>)** δ 166.34, 164.93, 142.65, 134.63, 132.35, 130.36, 129.81, 128.06, 61.02, 52.97, 13.84. **IR (ν<sub>max</sub>):** 2985.96, 1719.69, 1439.07, 1242.01, 832.82 cm<sup>-1</sup>. **HRMS (ESI):** *m/z* calcd for C<sub>13</sub>H<sub>14</sub>ClO<sub>4</sub> [M+H]<sup>+</sup> 269.0575, found 269.0590. Verified the analytical data with those reported in the literature.<sup>24</sup>

### Space time yield in previous reported batch process<sup>24</sup>

Productivity = 41.5 mg in 12 h

$$\text{Productivity (per h)} := \frac{0.041}{12} = 0.0034 \text{ g/h}$$

$$\text{Space time yield} := \frac{\text{productivity}}{\text{volume of reactor}}$$

$$= \frac{0.0034}{2} = 0.0017 \text{ g mL}^{-1} \text{ h}^{-1}$$

**Table S17.** Comparative result for the carbene insertion (C=C bond formation, fumarate).

| Entry | Compound <b>2a</b>                                                                  | Reagent <b>15a</b>                                                                  | Product <b>16a</b>                                                                  | Comparative result                                                                                                             |
|-------|-------------------------------------------------------------------------------------|-------------------------------------------------------------------------------------|-------------------------------------------------------------------------------------|--------------------------------------------------------------------------------------------------------------------------------|
| 1     | 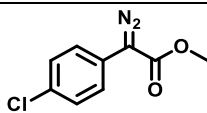 |  |  | 89%, 12.3 min. (our study)<br>Blue LED, 12 h, 93%<br><sup>24</sup><br>Artificial metalloenzymes,<br>22 h, 68%<br><sup>25</sup> |

### **S10. Case study-8: On demand chemical synthesis.**

After individually optimizing the experimental conditions and validating our codes for carbene insertion reactions with varied nucleophiles photo chemically, we aimed to integrate all the python codes (AB1, AB2, AB3, AB4, AB5, AB6, AB7) with optimized conditions. We drew inspiration from the natural grafting technique observed in hibiscus plants, where the root remains the same, but a portion of one plant is placed into the branch of another, resulting in the growth of the same kind of flower with different colours. Similarly, in our "digichemtree" approach, we maintain the same starting material, 4-chloro phenyl diazoester (**2a**), but graft our tree with varied nucleophiles (**3a**, **5a**, **7a**, **9a**, **11a**, **13**, **15**) to obtain our respective carbene-inserted products photo chemically. The neural network remains unchanged from our individual experiments, but we've now integrated a total of 9 pumps to flow the starting material and nucleophiles. The outlets of these pumps are connected to an 8-port valve for mixing purposes. The resulting stock solution then passes through a 1 mL PFA tubular reactor with a blue LED and tunable power supply. For fraction collection, we've utilized our tailor-made 3D printer module. This integrated system employs 4 syringe pumps and 5 HPLC pumps. As a model reaction, we've conducted 7 chemical transformations with 7 different nucleophiles.

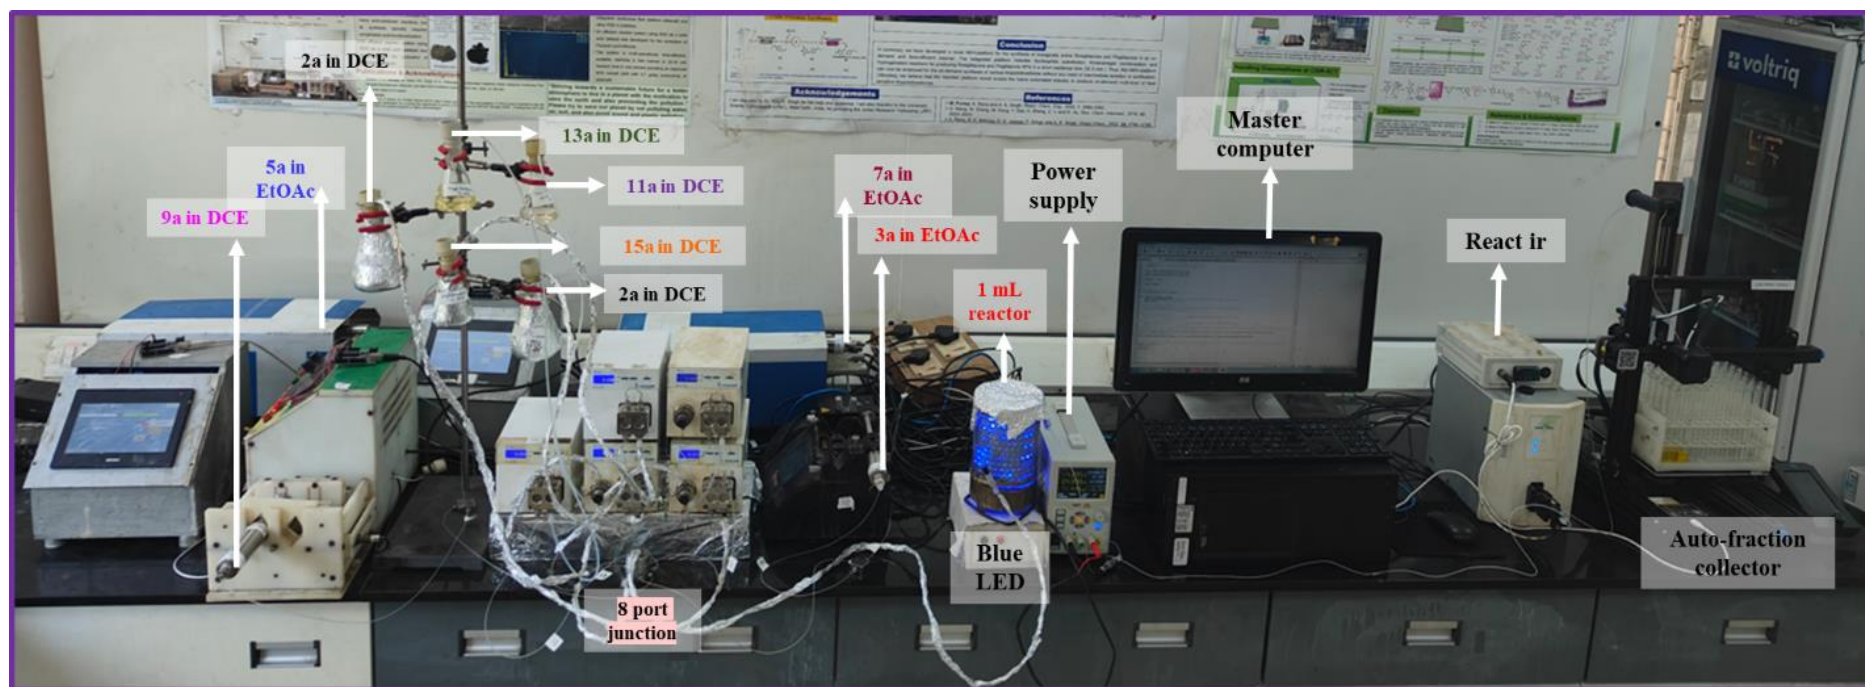

**Figure S54.** Actual picture of the setup.

## S10.1. Python code for integrated optimized condition for carbene insertion reactions.

### AB1.PY CODE (for benzoic acid)

```
AB1.py x
1
2 """
3 Created on Wed Aug 30 14:48:13 2023
4
5 @author: Admin
6 """
7
8
9 from os import listdir
10 from os.path import isfile, join
11 import serial
12
13 import numpy as np
14 import pandas as pd
15 import time
16 from scipy.integrate import trapz
17
18 #step1: be sure to the address of the files that the ftir data is exported is matching to line 11 (mypath)
19 mypath = "C:\\Users\\Admin\\Desktop\\ruchi\\Exp 2024-04-11 15-26"
20 onlyfiles = [f for f in listdir(mypath) if isfile(join(mypath, f))]
21
22
23 #step2: make sure that pump and the potentiostat is correctly addressed in the Line 16 and 17
24 pump_1 = serial.Serial("COM10",9600) #hwSyringe Pump
25 #pump_2 = serial.Serial("COM16",9600) #Syringe Pump
26 #pump_3 = serial.Serial("COM19",9600) #Syringe Pump
27 #pump_4 = serial.Serial("COM15",9600) #Syringe Pump
28 #pump_5 = serial.serial_for_url("COM29",9600) #HPLC Pump LAN
29 #pump_6 = serial.serial_for_url("socket://169.254.225.18:10001",9600)
30 port = serial.Serial("COM1",115200)
31 #pump_7 = serial.Serial("COM28",9600) #HPLC Pump
32 #pump_8 = serial.Serial("COM30",9600) #HPLC Pump
33 pump_9 = serial.Serial("COM5",9600) #HPLC Pump
34 printer = serial.Serial("COM14", 115200, timeout=1)
35
36 r_1=14.25 #radius of syringe used (50ml,14.25|20ml,9.6|10ml,7.25|5ml,6.03|3ml,4/3|1ml,2.39|60ml,13.36)
37 r_2=14.25
38 r_3=14.25
39 r_4=14.25
40 pump_1_k=(14.25/r_1)**2
41 #pump_2_k=(14.25/r_2)**2
42 #pump_3_k=(14.25/r_3)**2
43 #pump_4_k=(14.25/r_4)**2
44
45 #step 3: grab the lines from 22 to 90 and presss f9
46 def area_under(data,start,end):
```

```

47 x = np.flip(data.iloc[start:end,0].to_numpy())
48 y = np.flip(data.iloc[start:end,1].to_numpy())
49 area = trapz(y,x)
50 return np.abs(area)
51
52 def file_namer(num):
53     str1 = str(num)
54     length = int(len((str1)))
55     empt = ''
56     for i in range(5-length):
57         empt = empt+'0'
58
59     return empt+str1
60
61
62 def ftir_extract(filename,init,end):
63
64     filename = filename
65
66     temp_df = pd.read_csv(filename)
67     # nump_df = temp_df.to_numpy()
68     area = area_under(temp_df, init, end)
69     # max_peak = np.max(nump_df[90:120,1])
70     print(area)
71
72     return area
73
74
75 def function(flowrate_1,flowrate_2,flowrate_3,flowrate_4,flowrate_5,flowrate_6,flowrate_7,flowrate_8,flowrate_9,v,i):
76
77     #set the pumps with the flowrate as the desired flowrate for the function
78
79     fr_1 = flowrate_1*1000*pump_1_k #mL/min to microliter/min and syringe correction factor
80     #fr_2 = flowrate_2*1000*pump_2_k #mL/min to microliter/min and syringe correction factor
81     #fr_3 = flowrate_3*1000*pump_3_k #mL/min to microliter/min and syringe correction factor
82     #fr_4 = flowrate_4*1000*pump_4_k #mL/min to microliter/min and syringe correction factor
83     #fr_5 = flowrate_5*1000 #mL/min
84     #pump_5.write(('flow: '+ str(fr_5) + '\r').encode())
85
86     #time.sleep(0.1)
87     #fr_6=flowrate_6*1000 #converting mL/min to uL/min as pump takes this as input val
88     #pump_6.write(('flow: '+ str(fr_6) + '\r').encode())
89
90     #time.sleep(0.1)
91     #fr_7 = flowrate_7*1000 #mL/min
92     #pump_7.write(('flow: '+ str(fr_7) + '\r').encode())

```

```

93
94 #time.sleep(0.1)
95 #fr_8=flowrate_8*1000 #converting ml/min to ul/min as pump takes this as input val
96 #pump_8.write(('flow:'+ str(fr_8) + '\r').encode())
97
98 time.sleep(0.1)
99 fr_9=flowrate_9*1000 #converting ml/min to ul/min as pump takes this as input val
100 pump_9.write(('flow:'+ str(fr_9) + '\r').encode())
101 time.sleep(0.1)
102
103 #set the com port for potentiostat and set the voltage and current
104 vol = v
105 curr = i
106 port.write(('VOLT '+str(vol)+'\r\n').encode()) #to change the voltage we need to use "VOLT 1" command
107 port.write(('CURR '+str(curr)+'\r\n').encode()) #to change the current we need to use "CURR 1" command
108
109
110 #pumps run
111 #pump_5.write(b'on\r')
112 #time.sleep(0.1)
113 #pump_6.write(b'on\r')
114 #time.sleep(0.1)
115 #pump_7.write(b'on\r')
116 #time.sleep(0.1)
117 #pump_8.write(b'on\r')
118 #time.sleep(0.1)
119 pump_9.write(b'on\r')
120 time.sleep(0.1)
121
122
123 send_syr_command_1(f'fr_{fr_1}')
124 #send_syr_command_2(f'fr_{fr_2}')
125 #send_syr_command_3(f'fr_{fr_3}')
126 #send_syr_command_4(f'fr_{fr_4}')
127 time.sleep(6000)
128 def function2():
129     time.sleep(6000) # Last 3 minutes
130     files = [f for f in listdir(mypath) if isfile(join(mypath, f))]
131
132     val = 0
133
134     #change wavelengths as per product here.
135     f_row=17 #first row of range for wavelength as per IR CSV
136     l_row=24 #last row of range for wavelength as per IR CSV
137

```



```

138 val += ftir_extract(files[-1],f_row,l_row)
139 val += ftir_extract(files[-2],f_row,l_row)
140 val += ftir_extract(files[-3],f_row,l_row)
141
142 avg_val = val/3
143
144 return avg_val
145
146
147 #step 4:grab the line 93 and f9
148 from skopt.optimizer import Optimizer
149
150 def send_syr_command_1(command):
151     pump_1.write(command.encode() + b'\n') # Send the command to Arduino with a newline character
152     pump_1.flush() # Flush the serial buffer
153
154 #def send_syr_command_2(command):
155     #pump_2.write(command.encode() + b'\n') # Send the command to Arduino with a newline character
156     #pump_2.flush() # Flush the serial buffer
157
158 #def send_syr_command_3(command):
159     #pump_3.write(command.encode() + b'\n') # Send the command to Arduino with a newline character
160     #pump_3.flush() # Flush the serial buffer
161 #def send_syr_command_4(command):
162     #pump_4.write(command.encode() + b'\n') # Send the command to Arduino with a newline character
163     #pump_4.flush() # Flush the serial buffer
164 #step5:in line 96 we have to define the range that (flowrate,voltage,current) (from,to) and after (anytime) applying changes you need to grab the line 96 and f9
165 #flowrates are in ml/min, voltage in V, Current in Ampere
166 bounds = [(-0.050,-0.049),(0.1,0.2),(0.1,0.2),(0.1,0.2),(0.1,0.2),(0.1,0.2),(0.1,0.2),(0.1,0.2),(0.049,0.050),(14.49,14.50),(4.99,5.0)]
167 #step 6: grab the line 100 and f9
168 opter =Optimizer(bounds,base_estimator='gp',n_initial_points=3,acq_func="EI",random_state=np.random.randint(3326))
169
170
171 #step7: to selecte number of the cycles that you have to do the experiment and then grab the line 104 to 121 and f9: the closed loop experimentation is initiated
172 number_of_cycles =5
173 results = []
174 flowrates_1 = []
175 #flowrates_2 = []
176 #flowrates_3 = []
177 #flowrates_4 = []
178 #flowrates_5 = []
179 #flowrates_6 = []
180 #flowrates_7 = []
181 #flowrates_8 = []
182 flowrates_9 = []
183 vs = []

```

```

184 currents = []
185
186 product_wavelength=True #set to true if product wavelengths being monitored
187
188 if product_wavelength == True:
189     val=1
190 else:
191     val=-1
192
193 # Step 8: Test Tubes on Printer
194 USE_PRINTER = True
195 REST_HEIGHT = 200
196 X_HOME = -5
197 Y_HOME = 20
198 Z_HOME = 175
199 DEFAULT_PUMP_TIME="1"
200 # Distance between test tubes
201 X_SPACING=20
202 Y_SPACING=20
203 # Number of test tubes
204 X_ROWS = 11
205 Y_COLUMNS = 4
206
207 def send_cmd(cmd):
208     print(cmd)
209     printer.write(f"{cmd}\n".encode("ASCII"))
210
211 #-----code for changing column for run---
212 column_num=1 #column number of run to try from
213 Y_HOME=Y_HOME+(column_num-1)*Y_SPACING
214 #-----
215
216
217 def move(x=None, y=None, z=None):
218     s = "G0"
219     if x is not None:
220         s += f"X{x}"
221     if y is not None:
222         s += f"Y{y}"
223     if z is not None:
224         s += f"Z{z}"
225
226     s+= "F5000"
227     send_cmd(s)
228

```

```

229 def printer_positions():
230     for j in range(Y_COLUMNS):
231         for i in range(X_ROWS):
232             if j%2==1:
233                 yield (X_HOME + (X_ROWS - 1 - i) * X_SPACING, Y_HOME + j * Y_SPACING, Z_HOME)
234             else:
235                 yield (X_HOME + i * X_SPACING, Y_HOME + j * Y_SPACING, Z_HOME)
236
237 # Run this.
238 tube_location = list(printer_positions())
239
240 time.sleep(2)
241
242 try:
243     for i in range(number_of_cycles):
244         move(*tube_location[2*i])
245         asked = opter.ask()
246         function(asked[0],asked[1],asked[2],asked[3],asked[4],asked[5],asked[6],asked[7],asked[8],asked[9],asked[10])
247         move(*tube_location[2*i+1])
248         told= function2()
249
250         print(f"area under the curve in the round {i:.2f} = {told:.2f}")
251         opter.tell(asked,-told*val)
252         results.append(told)

```

```

253     flowrates_1.append(asked[0])
254     #flowrates_2.append(asked[1])
255     #flowrates_3.append(asked[2])
256     #flowrates_4.append(asked[3])
257     #flowrates_5.append(asked[4])
258     #flowrates_6.append(asked[5])
259     #flowrates_7.append(asked[6])
260     #flowrates_8.append(asked[7])
261     flowrates_9.append(asked[8])
262     vs.append(asked[9])
263     currents.append(asked[10])
264 #dict1 = {"flowrate_2":flowrates_2,"flowrate_3":flowrates_3,"flowrate_4":flowrates_4,"flowrate_5":flowrates_5,"flowrate_6":flowrates_6,"flowrate_7":flowrates_7,"flowrate_8":flowrates_8,"flowrate_9":flowrates_9,"voltage":vs,"currents":currents,"area-results":results}
265 dict1 = {"flowrate_1":flowrates_1,"flowrate_9":flowrates_9,"voltages":vs,"currents":currents,"area-results":results}
266 df2 = pd.DataFrame(dict1)
267 df2.to_csv("output round "+str(i)+".csv")
268 finally:
269     pump_1.write(b'stop\r')
270     #pump_2.write(b'stop\r')
271     #pump_3.write(b'stop\r')
272     #pump_4.write(b'stop\r')
273     #pump_5.write(b'off\r')
274     #pump_6.write(b'off\r')
275     #pump_7.write(b'off\r')
276     #pump_8.write(b'off\r')
277     pump_9.write(b'off\r')
278

```

## AB2.py (for thiophenol)

```
AB2.py x
1
2 """
3 Created on Wed Aug 30 14:48:13 2023
4
5 @author: Admin
6 """
7
8
9 from os import listdir
10 from os.path import isfile, join
11 import serial
12
13 import numpy as np
14 import pandas as pd
15 import time
16 from scipy.integrate import trapz
17
18 #step1: be sure to the address of the files that the ftir data is exported is matching to line 11 (mypath)
19 mypath = "C:\\Users\\Admin\\Desktop\\ruchi\\Exp 2024-04-11 11-04"
20 onlyfiles = [f for f in listdir(mypath) if isfile(join(mypath, f))]
21
22
23 #step2: make sure that pump and the potentiostat is correctly addressed in the line 16 and 17
24 #pump_1 = serial.Serial("COM10",9600) #hwSyringe Pump
25 pump_2 = serial.Serial("COM16",9600) #Syringe Pump
26 #pump_3 = serial.Serial("COM19",9600) #Syringe Pump
27 #pump_4 = serial.Serial("COM15",9600) #Syringe Pump
28 #pump_5 = serial.serial_for_url("COM29",9600) #HPLC Pump LAN
29 #pump_6 = serial.serial_for_url("socket://169.254.225.18:10001",9600)
30 port = serial.Serial("COM1",115200)
31 #pump_7 = serial.Serial("COM28",9600) #HPLC Pump
32 #pump_8 = serial.Serial("COM30",9600) #HPLC Pump
33 pump_9 = serial.Serial("COM5",9600) #HPLC Pump
34 printer = serial.Serial("COM14", 115200, timeout=1)
35
36 r_1=14.25 #radius of syringe used (50ml,14.25|20ml,9.6|10ml,7.25|5ml,6.03|3ml,4/3|1ml,2.39|60ml,13.36)
37 r_2=14.25
38 r_3=14.25
39 r_4=14.25
40 #pump_1_k=(14.25/r_1)**2
41 pump_2_k=(14.25/r_2)**2
42 #pump_3_k=(14.25/r_3)**2
43 #pump_4_k=(14.25/r_4)**2
44
45 #step 3: grab the lines from 22 to 90 and press f9
46 def area_under(data,start,end):
```

```

47 x = np.flip(data.iloc[start:end,0].to_numpy())
48 y = np.flip(data.iloc[start:end,1].to_numpy())
49 area = trapz(y,x)
50 return np.abs(area)
51
52 def file_namer(num):
53     str1 = str(num)
54     length = int(len((str1)))
55     empt = ''
56     for i in range(5-length):
57         empt = empt+'0'
58
59     return empt+str1
60
61
62 def ftir_extract(filename,init,end):
63
64     filename = filename
65
66     temp_df = pd.read_csv(filename)
67     # nump_df = temp_df.to_numpy()
68     area = area_under(temp_df, init, end)
69     # max_peak = np.max(nump_df[90:120,1])
70     print(area)
71
72     return area
73
74
75 def function(flowrate_1,flowrate_2,flowrate_3,flowrate_4,flowrate_5,flowrate_6,flowrate_7,flowrate_8,flowrate_9,v,i):
76
77     #set the pumps with the flowrate as the desired flowrate for the function
78
79     #fr_1 = flowrate_1*1000*pump_1_k #mL/min to microliter/min and syringe correction factor
80     fr_2 = flowrate_2*1000*pump_2_k #mL/min to microliter/min and syringe correction factor
81     #fr_3 = flowrate_3*1000*pump_3_k #mL/min to microliter/min and syringe correction factor
82     #fr_4 = flowrate_4*1000*pump_4_k #mL/min to microliter/min and syringe correction factor
83     #fr_5 = flowrate_5*1000 #mL/min
84     #pump_5.write(('flow:'+ str(fr_5) + '\r').encode())
85
86     #time.sleep(0.1)
87     #fr_6=flowrate_6*1000 #converting mL/min to uL/min as pump takes this as input val
88     #pump_6.write(('flow:'+ str(fr_6) + '\r').encode())
89
90     #time.sleep(0.1)
91     #fr_7 = flowrate_7*1000 #mL/min
92     #pump_7.write(('flow:'+ str(fr_7) + '\r').encode())

```

```

93
94 #time.sleep(0.1)
95 #fr_8=flowrate_8*1000 #converting ml/min to ul/min as pump takes this as input val
96 #pump_8.write(('flow:'+ str(fr_8) + '\r').encode())
97
98 time.sleep(0.1)
99 fr_9=flowrate_9*1000 #converting ml/min to ul/min as pump takes this as input val
100 pump_9.write(('flow:'+ str(fr_9) + '\r').encode())
101 time.sleep(0.1)
102
103 #set the com port for potentiostat and set the voltage and current
104 vol = v
105 curr = i
106 port.write(('VOLT '+str(vol)+'\r\n').encode()) #to change the voltge we need to use "VOLT 1" command
107 port.write(('CURR '+str(curr)+'\r\n').encode()) #to change the current we need to use "CURR 1" command
108
109
110 #pumps run
111 #pump_5.write(b'on\r')
112 #time.sleep(0.1)
113 #pump_6.write(b'on\r')
114 #time.sleep(0.1)
115 #pump_7.write(b'on\r')
116 #time.sleep(0.1)
117 #pump_8.write(b'on\r')
118 #time.sleep(0.1)
119 pump_9.write(b'on\r')
120 time.sleep(0.1)
121
122
123 #send_syr_command_1(f'fr{fr_1}')
124 send_syr_command_2(f'fr{fr_2}')
125 #send_syr_command_3(f'fr{fr_3}')
126 #send_syr_command_4(f'fr{fr_4}')
127 time.sleep(3300)
128 def function2():
129 time.sleep(3300) # Last 3 minutes
130 files = [f for f in listdir(mypath) if isfile(join(mypath, f))]
131
132 val = 0
133
134 #change wavelengths as per product here.
135 f_row=17 #first row of range for wavelength as per IR CSV
136 l_row=24 #last row of range for wavelength as per IR CSV
137

```

```

138 val += ftir_extract(files[-1],f_row,l_row)
139 val += ftir_extract(files[-2],f_row,l_row)
140 val += ftir_extract(files[-3],f_row,l_row)
141
142 avg_val = val/3
143
144 return avg_val
145
146
147 #step 4:grab the line 93 and f9
148 from skopt.optimizer import Optimizer
149
150 #def send_syr_command_1(command):
151     #pump_1.write(command.encode() + b'\n') # Send the command to Arduino with a newline character
152     #pump_1.flush() # Flush the serial buffer
153
154 def send_syr_command_2(command):
155     pump_2.write(command.encode() + b'\n') # Send the command to Arduino with a newline character
156     pump_2.flush() # Flush the serial buffer
157
158 #def send_syr_command_3(command):
159     #pump_3.write(command.encode() + b'\n') # Send the command to Arduino with a newline character
160     #pump_3.flush() # Flush the serial buffer
161 #def send_syr_command_4(command):
162     #pump_4.write(command.encode() + b'\n') # Send the command to Arduino with a newline character
163     #pump_4.flush() # Flush the serial buffer
164 #step5:in line 96 we have to define the range that (flowrate,voltage,current) (from,to) and after (anytime) appling changes you need to grab the line 96 and f9
165 #flowrates are in ml/min, voltage in V, Current in Ampere
166 bounds = [(-10.0,-5.0),(0.086,0.087),(0.1,0.2),(0.1,0.2),(0.1,0.2),(0.1,0.2),(0.1,0.2),(0.1,0.2),(0.086,0.087),(14.49,14.50),(4.99,5.0)]
167 #step 6: grab the line 100 and f9
168 opter =Optimizer(bounds,base_estimator='gp',n_initial_points=3,acq_func="EI",random_state=np.random.randint(3326))
169
170
171 #step7: to selecte number of the cycles that you have to do the experiment and then grab the line 104 to 121 and f9: the closed loop experimentation is initiated
172 number_of_cycles =5
173 results = []
174 #flowrates_1 = []
175 flowrates_2 = []
176 #flowrates_3 = []
177 #flowrates_4 = []
178 #flowrates_5 = []
179 #flowrates_6 = []
180 #flowrates_7 = []
181 #flowrates_8 = []
182 flowrates_9 = []
183 vs = []

```

```

184 currents = []
185
186 product_wavelength=True #set to true if product wavelengths being monitored
187
188 if product_wavelength == True:
189     val=1
190 else:
191     val=-1
192
193 # Step 8: Test Tubes on Printer
194 USE_PRINTER = True
195 REST_HEIGHT = 200
196 X_HOME = -5
197 Y_HOME = 20
198 Z_HOME = 175
199 DEFAULT_PUMP_TIME="1"
200 # Distance between test tubes
201 X_SPACING=20
202 Y_SPACING=20
203 # Number of test tubes
204 X_ROWS = 11
205 Y_COLUMNS = 4
206
207 #-----code for changing column for run---
208 column_num=2 #column number of run to try from
209 Y_HOME=Y_HOME+(column_num-1)*Y_SPACING
210 #-----
211
212 def send_cmd(cmd):
213     print(cmd)
214     printer.write(f"{cmd}\n".encode("ASCII"))
215
216 def move(x=None, y=None, z=None):
217     s = "G0"
218     if x is not None:
219         s += f"X{x}"
220     if y is not None:
221         s += f"Y{y}"
222     if z is not None:
223         s += f"Z{z}"
224

```



```

225     s+= "F5000"
226     send_cmd(s)
227
228 def printer_positions():
229     for j in range(Y_COLUMNS):
230         for i in range(X_ROWS):
231             if j%2==1:
232                 yield (X_HOME + (X_ROWS - 1 - i) * X_SPACING, Y_HOME + j * Y_SPACING, Z_HOME)
233             else:
234                 yield (X_HOME + i * X_SPACING, Y_HOME + j * Y_SPACING, Z_HOME)
235
236 # Run this.
237 tube_location = list(printer_positions())
238
239 time.sleep(2)
240
241 try:
242     for i in range(number_of_cycles):
243         move(*tube_location[2*i])
244         asked = opter.ask()
245         function(asked[0],asked[1],asked[2],asked[3],asked[4],asked[5],asked[6],asked[7],asked[8],asked[9],asked[10])
246         move(*tube_location[2*i+1])
247         told= function2()
248
249         print(f"area under the curve in the round {i:.2f} = {told:.2f}")
250         opter.tell(asked,-told*val)
251         results.append(told)
252         #flowrates_1.append(asked[0])
253         flowrates_2.append(asked[1])
254         #flowrates_3.append(asked[2])
255         #flowrates_4.append(asked[3])
256         #flowrates_5.append(asked[4])
257         #flowrates_6.append(asked[5])
258         #flowrates_7.append(asked[6])
259         #flowrates_8.append(asked[7])
260         flowrates_9.append(asked[8])
261         vs.append(asked[9])
262         currents.append(asked[10])
263
264         #dict1 = {"flowrate_2":flowrates_2,"flowrate_3":flowrates_3,"flowrate_4":flowrates_4,"flowrate_5":flowrates_5,"flowrate_6":flowrates_6,"flowrate_7":flowrates_7,"flowrate_8":flowrates_8,"flowrate_9":flowrates_9
265         dict1 = {"flowrate_2":flowrates_2,"flowrate_9":flowrates_9,"voltages":vs,"currents":currents,"area-results":results}
266         df2 = pd.DataFrame(dict1)
267         df2.to_csv("output round "+str(i)+".csv")
268 finally:
269     #pump_1.write(b'stop\r')
270     pump_2.write(b'stop\r')
271     #pump_3.write(b'stop\r')
272     #pump_4.write(b'stop\r')
273     #pump_5.write(b'off\r')
274     #pump_6.write(b'off\r')
275     #pump_7.write(b'off\r')
276     #pump_8.write(b'off\r')
277     pump_9.write(b'off\r')
278

```

## AB3.py (for aniline)

```
AB3.py* X
1
2 """
3 Created on Wed Aug 30 14:48:13 2023
4
5 @author: Admin
6 """
7
8
9 from os import listdir
10 from os.path import isfile, join
11 import serial
12
13 import numpy as np
14 import pandas as pd
15 import time
16 from scipy.integrate import trapz
17
18 #step1: be sure to the address of the files that the ftir data is exported is matching to line 11 (mypath)
19 mypath = "C:\\Users\\Admin\\Desktop\\ruchi\\Exp 2024-04-11 11-30"
20 onlyfiles = [f for f in listdir(mypath) if isfile(join(mypath, f))]
21
22
23 #step2: make sure that pump and the potentiostat is correctly addressed in the line 16 and 17
24 #pump_1 = serial.Serial("COM10",9600) #hwSyringe Pump
25 #pump_2 = serial.Serial("COM16",9600) #Syringe Pump
26 pump_3 = serial.Serial("COM19",9600) #Syringe Pump
27 #pump_4 = serial.Serial("COM15",9600) #Syringe Pump
28 #pump_5 = serial.serial_for_url("COM29",9600) #HPLC Pump LAN
29 #pump_6 = serial.serial_for_url("socket://169.254.225.18:10001",9600)
30 port = serial.Serial("COM1",115200)
31 #pump_7 = serial.Serial("COM28",9600) #HPLC Pump
32 #pump_8 = serial.Serial("COM30",9600) #HPLC Pump
33 pump_9 = serial.Serial("COM5",9600) #HPLC Pump
34 printer = serial.Serial("COM14", 115200, timeout=1)
35
36 r_1=14.25 #radius of syringe used (50ml,14.25|20ml,9.6|10ml,7.25|5ml,6.03|3ml,4/3|1ml,2.39|60ml,13.36)
37 r_2=14.25
38 r_3=14.25
39 r_4=14.25
40 #pump_1_k=(14.25/r_1)**2
41 #pump_2_k=(14.25/r_2)**2
42 pump_3_k=(14.25/r_3)**2
43 #pump_4_k=(14.25/r_4)**2
44
```

```

45 #step 3: grab the lines from 22 to 90 and presss f9
46 def area_under(data,start,end):
47     x = np.flip(data.iloc[start:end,0].to_numpy())
48     y = np.flip(data.iloc[start:end,1].to_numpy())
49     area = trapz(y,x)
50     return np.abs(area)
51
52 def file_namer(num):
53     str1 = str(num)
54     length = int(len((str1)))
55     empt = ''
56     for i in range(5-length):
57         empt = empt+'0'
58
59     return empt+str1
60
61
62 def ftir_extract(filename,init,end):
63
64     filename = filename
65
66     temp_df = pd.read_csv(filename)
67     # nump_df = temp_df.to_numpy()
68     area = area_under(temp_df, init, end)
69     # max_peak = np.max(nump_df[90:120,1])
70     print(area)
71
72     return area
73
74
75 def function(flowrate_1,flowrate_2,flowrate_3,flowrate_4,flowrate_5,flowrate_6,flowrate_7,flowrate_8,flowrate_9,v,i):
76
77     #set the pumps with the flowrate as the desired flowrate for the function
78
79     #fr_1 = flowrate_1*1000*pump_1_k #ml/min to microliter/min and syringe correction factor
80     #fr_2 = flowrate_2*1000*pump_2_k #ml/min to microliter/min and syringe correction factor
81     fr_3 = flowrate_3*1000*pump_3_k #ml/min to microliter/min and syringe correction factor
82     #fr_4 = flowrate_4*1000*pump_4_k #ml/min to microliter/min and syringe correction factor
83     #fr_5 = flowrate_5*1000 #ml/min
84     #pump_5.write(('flow:'+ str(fr_5) + '\r').encode())
85

```

```

86 #time.sleep(0.1)
87 #fr_6=flowrate_6*1000 #converting ml/min to ul/min as pump takes this as input val
88 #pump_6.write(('flow:'+ str(fr_6) + '\r').encode())
89
90 #time.sleep(0.1)
91 #fr_7 = flowrate_7*1000 #ml/min
92 #pump_7.write(('flow:'+ str(fr_7) + '\r').encode())
93
94 #time.sleep(0.1)
95 #fr_8=flowrate_8*1000 #converting ml/min to ul/min as pump takes this as input val
96 #pump_8.write(('flow:'+ str(fr_8) + '\r').encode())
97
98 time.sleep(0.1)
99 fr_9=flowrate_9*1000 #converting ml/min to ul/min as pump takes this as input val
100 pump_9.write(('flow:'+ str(fr_9) + '\r').encode())
101 time.sleep(0.1)
102
103 #set the com port for potentiostat and set the voltage and current
104 vol = v
105 curr = i
106 port.write(('VOLT '+str(vol)+'\r\n').encode()) #to change the voltge we need to use "VOLT 1" command
107 port.write(('CURR '+str(curr)+'\r\n').encode()) #to change the current we need to use "CURR 1" command
108
109
110 #pumps run
111 #pump_5.write(b'on\r')
112 #time.sleep(0.1)
113 #pump_6.write(b'on\r')
114 #time.sleep(0.1)
115 #pump_7.write(b'on\r')
116 #time.sleep(0.1)
117 #pump_8.write(b'on\r')
118 #time.sleep(0.1)
119 pump_9.write(b'on\r')
120 time.sleep(0.1)
121
122
123 #send_syr_command_1(f'fr_{fr_1}')
124 #send_syr_command_2(f'fr_{fr_2}')
125 send_syr_command_3(f'fr_{fr_3}')
126 #send_syr_command_4(f'fr_{fr_4}')
127 time.sleep(6000)
128 def function2():
129     time.sleep(6000) # Last 3 minutes
130     files = [f for f in listdir(mypath) if isfile(join(mypath, f))]

```

```

131
132     val = 0
133
134     #change wavelengths as per product here.
135     f_row=17 #first row of range for wavelength as per IR CSV
136     l_row=24 #Last row of range for wavelength as per IR CSV
137
138     val += ftir_extract(files[-1],f_row,l_row)
139     val += ftir_extract(files[-2],f_row,l_row)
140     val += ftir_extract(files[-3],f_row,l_row)
141
142     avg_val = val/3
143
144     return avg_val
145
146
147 #step 4:grab the line 93 and f9
148 from skopt.optimizer import Optimizer
149
150 #def send_syr_command_1(command):
151     #pump_1.write(command.encode() + b'\n') # Send the command to Arduino with a newline character
152     #pump_1.flush() # Flush the serial buffer
153
154 #def send_syr_command_2(command):
155     #pump_2.write(command.encode() + b'\n') # Send the command to Arduino with a newline character
156     #pump_2.flush() # Flush the serial buffer
157
158 def send_syr_command_3(command):
159     pump_3.write(command.encode() + b'\n') # Send the command to Arduino with a newline character
160     pump_3.flush() # Flush the serial buffer
161 #def send_syr_command_4(command):
162     #pump_4.write(command.encode() + b'\n') # Send the command to Arduino with a newline character
163     #pump_4.flush() # Flush the serial buffer
164 #step5:in line 96 we have to define the range that (flowrate,voltage,current) (from,to) and after (anytime) applying changes you need to grab the line 96 and f9
165 #flowrates are in ml/min, voltage in V, Current in Ampere
166 bounds = [(-10.0,-5.0),(0.1,0.2),(-0.05,-0.049),(0.1,0.2),(0.1,0.2),(0.1,0.2),(0.1,0.2),(0.1,0.2),(0.049,0.050),(14.49,14.5),(4.99,5.00)]
167 #step 6: grab the line 100 and f9
168 opter =Optimizer(bounds,base_estimator='gp',n_initial_points=3,acq_func="EI",random_state=np.random.randint(3326))
169
170

```

```

171 #step7: to selecte number of the cycles that you have to do the experiment and then grab the line 104 to 121 and f9: the closed loop
172 number_of_cycles =5
173 results = []
174 #flowrates_1 = []
175 #flowrates_2 = []
176 flowrates_3 = []
177 #flowrates_4 = []
178 #flowrates_5 = []
179 #flowrates_6 = []
180 #flowrates_7 = []
181 #flowrates_8 = []
182 flowrates_9 = []
183 vs = []
184 currents = []
185
186 product_wavelength=True #set to true if product wavelengths being monitored
187
188 if product_wavelength == True:
189     val=1
190 else:
191     val=-1
192
193 # Step 8: Test Tubes on Printer
194 USE_PRINTER = True
195 REST_HEIGHT = 200
196 X_HOME = -5
197 Y_HOME = 20
198 Z_HOME = 175
199 DEFAULT_PUMP_TIME="1"
200 # Distance between test tubes
201 X_SPACING=20
202 Y_SPACING=20
203 # Number of test tubes
204 X_ROWS = 11
205 Y_COLUMNS = 4
206
207 #-----code for changing column for run---
208 column_num=3 #column number of run to try from
209 Y_HOME=Y_HOME+(column_num-1)*Y_SPACING
210 #-----
211

```

```

212 def send_cmd(cmd):
213     print(cmd)
214     printer.write(f"{cmd}\n".encode("ASCII"))
215
216 def move(x=None, y=None, z=None):
217     s = "G0"
218     if x is not None:
219         s += f"X{x}"
220     if y is not None:
221         s += f"Y{y}"
222     if z is not None:
223         s += f"Z{z}"
224
225     s += "F5000"
226     send_cmd(s)
227
228 def printer_positions():
229     for j in range(Y_COLUMNS):
230         for i in range(X_ROWS):
231             if j%2==1:
232                 yield (X_HOME + (X_ROWS - 1 - i) * X_SPACING, Y_HOME + j * Y_SPACING, Z_HOME)
233             else:
234                 yield (X_HOME + i * X_SPACING, Y_HOME + j * Y_SPACING, Z_HOME)
235
236 # Run this.
237 tube_location = list(printer_positions())
238
239 time.sleep(2)
240
241 try:
242     for i in range(number_of_cycles):
243         move(*tube_location[2*i])
244         asked = opter.ask()
245         function(asked[0],asked[1],asked[2],asked[3],asked[4],asked[5],asked[6],asked[7],asked[8],asked[9],asked[10])
246         move(*tube_location[2*i+1])
247         told= function2()
248
249         print(f"area under the curve in the round {i:.2f} = {told:.2f}")
250         opter.tell(asked,-told*val)
251         results.append(told)
252         #flowrates_1.append(asked[0])
253         #flowrates_2.append(asked[1])
254         flowrates_3.append(asked[2])
255         #flowrates_4.append(asked[3])
256         #flowrates_5.append(asked[4])
257         #flowrates_6.append(asked[5])
258         #flowrates_7.append(asked[6])
259         #flowrates_8.append(asked[7])
260         flowrates_9.append(asked[8])
261         vs.append(asked[9])
262         currents.append(asked[10])
263
264         #dict1 = {"flowrate_2":flowrates_2,"flowrate_3":flowrates_3,"flowrate_4":flowrates_4,"flowrate_5":flowrates_5,"flowrate_6":flowrates_6,"flowrate_7":flowrates_7,"flowrate_8":flowrates_8,"flowrate_9":flowrates_
265         dict1 = {"flowrate_3":flowrates_3,"flowrate_9":flowrates_9,"voltages":vs,"currents":currents,"area-results":results}
266         df2 = pd.DataFrame(dict1)
267         df2.to_csv("output round "+str(i)+".csv")
268 finally:
269     #pump_1.write(b'stop\r')
270     #pump_2.write(b'stop\r')
271     pump_3.write(b'stop\r')
272     #pump_4.write(b'stop\r')
273     #pump_5.write(b'off\r')
274     #pump_6.write(b'off\r')
275     #pump_7.write(b'off\r')
276     #pump_8.write(b'off\r')
277     pump_9.write(b'off\r')
278

```

## AB4.py (for styrene)

```
AB4.py x
1
2 """
3 Created on Wed Aug 30 14:48:13 2023
4
5 @author: Admin
6 """
7
8
9 from os import listdir
10 from os.path import isfile, join
11 import serial
12
13 import numpy as np
14 import pandas as pd
15 import time
16 from scipy.integrate import trapz
17
18 #step1: be sure to the address of the files that the ftir data is exported is matching to line 11 (mypath)
19 mypath = "C:\\Users\\Admin\\Desktop\\ruchi\\Exp 2024-04-11 12-01"
20 onlyfiles = [f for f in listdir(mypath) if isfile(join(mypath, f))]
21
22
23 #step2: make sure that pump and the potentiostat is correctly addressed in the line 16 and 17
24 #pump_1 = serial.Serial("COM10",9600) #hwSyringe Pump
25 #pump_2 = serial.Serial("COM16",9600) #Syringe Pump
26 #pump_3 = serial.Serial("COM19",9600) #Syringe Pump
27 #pump_4 = serial.Serial("COM15",9600) #Syringe Pump
28 #pump_5 = serial.Serial("COM29",9600) #HPLC Pump LAN
29 #pump_6 = serial.Serial("socket://169.254.225.18:10001",9600)
30 #port = serial.Serial("COM1",115200)
31 #pump_7 = serial.Serial("COM28",9600) #HPLC Pump
32 #pump_8 = serial.Serial("COM30",9600) #HPLC Pump
33 #pump_9 = serial.Serial("COM5",9600) #HPLC Pump
34 #printer = serial.Serial("COM14", 115200, timeout=1)
35
36 r_1=14.25 #radius of syringe used (50mL,14.25|20mL,9.6|10mL,7.25|5mL,6.03|3mL,4/3|1mL,2.39|60mL,13.36)
37 r_2=14.25
38 r_3=14.25
39 r_4=14.25
40 #pump_1_k=(14.25/r_1)**2
41 #pump_2_k=(14.25/r_2)**2
42 #pump_3_k=(14.25/r_3)**2
43 #pump_4_k=(14.25/r_4)**2
44
```



```

45 #step 3: grab the lines from 22 to 90 and press f9
46 def area_under(data,start,end):
47     x = np.flip(data.iloc[start:end,0].to_numpy())
48     y = np.flip(data.iloc[start:end,1].to_numpy())
49     area = trapezoid(y,x)
50     return np.abs(area)
51
52 def file_namer(num):
53     str1 = str(num)
54     length = int(len(str1))
55     empt = ''
56     for i in range(5-length):
57         empt = empt+'0'
58
59     return empt+str1
60
61
62 def ftir_extract(filename,init,end):
63
64     filename = filename
65
66     temp_df = pd.read_csv(filename)
67     # nump_df = temp_df.to_numpy()
68     area = area_under(temp_df, init, end)
69     # max_peak = np.max(nump_df[90:120,1])
70     print(area)
71
72     return area
73
74
75 def function(flowrate_1,flowrate_2,flowrate_3,flowrate_4,flowrate_5,flowrate_6,flowrate_7,flowrate_8,flowrate_9,v,i):
76
77     #set the pumps with the flowrate as the desired flowrate for the function
78
79     #fr_1 = flowrate_1*1000*pump_1_k #mL/min to microliter/min and syringe correction factor
80     #fr_2 = flowrate_2*1000*pump_2_k #mL/min to microliter/min and syringe correction factor
81     #fr_3 = flowrate_3*1000*pump_3_k #mL/min to microliter/min and syringe correction factor
82     fr_4 = flowrate_4*1000*pump_4_k #mL/min to microliter/min and syringe correction factor
83     #time.sleep(0.1)
84     #fr_5 = flowrate_5*1000 #mL/min
85     #pump_5.write(('flow:'+ str(fr_5) + '\r').encode())
86

```

```

87 #time.sleep(0.1)
88 #fr_6=flowrate_6*1000 #converting ml/min to ul/min as pump takes this as input val
89 #pump_6.write(('flow:'+ str(fr_6) + '\r').encode())
90
91 #time.sleep(0.1)
92 #fr_7 = flowrate_7*1000 #mL/min
93 #pump_7.write(('flow:'+ str(fr_7) + '\r').encode())
94
95 time.sleep(0.1)
96 fr_8=flowrate_8*1000 #converting ml/min to ul/min as pump takes this as input val
97 pump_8.write(('flow:'+ str(fr_8) + '\r').encode())
98
99 #time.sleep(0.1)
100 #fr_9=flowrate_9*1000 #converting ml/min to ul/min as pump takes this as input val
101 #pump_9.write(('flow:'+ str(fr_9) + '\r').encode())
102 #time.sleep(0.1)
103
104 #set the com port for potentiostat and set the voltage and current
105 vol = v
106 curr = i
107 port.write(('VOLT '+str(vol)+'\r\n').encode()) #to change the voltge we need to use "VOLT 1" command
108 port.write(('CURR '+str(curr)+'\r\n').encode()) #to change the current we need to use "CURR 1" command
109
110
111 #pumps run
112 #pump_5.write(b'on\r')
113 #time.sleep(0.1)
114 #pump_6.write(b'on\r')
115 #time.sleep(0.1)
116 #pump_7.write(b'on\r')
117 #time.sleep(0.1)
118 pump_8.write(b'on\r')
119 time.sleep(0.1)
120 #pump_9.write(b'on\r')
121 #time.sleep(0.1)
122
123

```

```

124 #send_syr_command_1(f'fr{fr_1}')
125 #send_syr_command_2(f'fr{fr_2}')
126 #send_syr_command_3(f'fr{fr_3}')
127 send_syr_command_4(f'fr{fr_4}')
128 time.sleep(15000)
129 def function2():
130     time.sleep(15000) # Last 3 minutes
131     files = [f for f in listdir(mypath) if.isfile(join(mypath, f))]
132
133     val = 0
134
135     #change wavelengths as per product here.
136     f_row=17 #first row of range for wavelength as per IR CSV
137     l_row=24 #Last row of range for wavelength as per IR CSV
138
139     val += ftir_extract(files[-1],f_row,l_row)
140     val += ftir_extract(files[-2],f_row,l_row)
141     val += ftir_extract(files[-3],f_row,l_row)
142
143     avg_val = val/3
144
145     return avg_val
146
147
148 #step 4:grab the line 93 and f9
149 from skopt.optimizer import Optimizer
150
151 #def send_syr_command_1(command):
152     #pump_1.write(command.encode() + b'\n') # Send the command to Arduino with a newline character
153     #pump_1.flush() # Flush the serial buffer
154
155 #def send_syr_command_2(command):
156     #pump_2.write(command.encode() + b'\n') # Send the command to Arduino with a newline character
157     #pump_2.flush() # Flush the serial buffer
158
159 #def send_syr_command_3(command):
160     #pump_3.write(command.encode() + b'\n') # Send the command to Arduino with a newline character
161     #pump_3.flush() # Flush the serial buffer

```

```

162 def send_syr_command_4(command):
163     pump_4.write(command.encode() + b'\n') # Send the command to Arduino with a newline character
164     pump_4.flush() # Flush the serial buffer
165 #step5:in line 96 we have to define the range that (flowrate,voltage,current) (from,to) and after (anytime) applying changes you need to grab the line 96 and f9
166 #flowrates are in ml/min, voltage in V, Current in Amperes
167 bounds = [(-10.0,-5.0),(0.1,0.2),(0.1,0.2),(0.014,0.015),(0.1,0.2),(0.1,0.2),(0.1,0.2),(0.014,0.015),(0.1,0.2),(14.49,14.5),(4.99,5.0)]
168 #step 6: grab the line 100 and f9
169 opter =Optimizer(bounds,base_estimator='gp',n_initial_points=3,acq_func="EI",random_state=np.random.randint(3326))
170
171
172 #step7: to selecte number of the cycles that you have to do the experiment and then grab the line 104 to 121 and f9: the closed loop experimentation is initiated
173 number_of_cycles =5
174 results = []
175 #flowrates_1 = []
176 #flowrates_2 = []
177 #flowrates_3 = []
178 flowrates_4 = []
179 #flowrates_5 = []
180 #flowrates_6 = []
181 #flowrates_7 = []
182 flowrates_8 = []
183 #flowrates_9 = []
184 vs = []
185 currents = []
186
187 product_wavelength=True #set to true if product wavelengths being monitored
188
189 if product_wavelength == True:
190     val=1
191 else:
192     val=-1
193
194 # Step 8: Test Tubes on Printer
195 USE_PRINTER = True
196 REST_HEIGHT = 200
197 X_HOME = -5
198 Y_HOME = 20
199 Z_HOME = 175
200 DEFAULT_PUMP_TIME="1"
201 # Distance between test tubes
202 X_SPACING=20
203 Y_SPACING=20
204 # Number of test tubes

```

```

205 X_ROWS = 11
206 Y_COLUMNS = 4
207
208 #-----code for changing column for run---
209 column_num=4 #column number of run to try from
210 Y_HOME=Y_HOME+(column_num-1)*Y_SPACING
211 #-----
212
213 def send_cmd(cmd):
214     print(cmd)
215     printer.write(f"{cmd}\n".encode("ASCII"))
216
217 def move(x=None, y=None, z=None):
218     s = "G0"
219     if x is not None:
220         s += f"X{x}"
221     if y is not None:
222         s += f"Y{y}"
223     if z is not None:
224         s += f"Z{z}"
225
226     s+= "F5000"
227     send_cmd(s)
228
229 def printer_positions():
230     for j in range(Y_COLUMNS):
231         for i in range(X_ROWS):
232             if j%2==1:
233                 yield (X_HOME + (X_ROWS - 1 - i) * X_SPACING, Y_HOME + j * Y_SPACING, Z_HOME)
234             else:
235                 yield (X_HOME + i * X_SPACING, Y_HOME + j * Y_SPACING, Z_HOME)
236
237 # Run this.
238 tube_location = list(printer_positions())
239

```

```

240 time.sleep(2)
241
242 try:
243     for i in range(number_of_cycles):
244         move(*tube_location[2*i])
245         asked = opter.ask()
246         function(asked[0],asked[1],asked[2],asked[3],asked[4],asked[5],asked[6],asked[7],asked[8],asked[9],asked[10])
247         move(*tube_location[2*i+1])
248         told= function2()
249
250         print(f"area under the curve in the round {i:.2f} = {told:.2f}")
251         opter.tell(asked,-told*val)
252         results.append(told)
253         #flowrates_1.append(asked[0])
254         #flowrates_2.append(asked[1])
255         #flowrates_3.append(asked[2])
256         flowrates_4.append(asked[3])
257         #flowrates_5.append(asked[4])
258         #flowrates_6.append(asked[5])
259         #flowrates_7.append(asked[6])
260         flowrates_8.append(asked[7])
261         #flowrates_9.append(asked[8])
262         vs.append(asked[9])
263         currents.append(asked[10])
264
265         #dict1 = {"flowrate_2":flowrates_2,"flowrate_3":flowrates_3,"flowrate_4":flowrates_4,"flowrate_5":flowrates_5,"flowrate_6":flowrates_6,"flowrate_7":flowrates_7,"flowrate_8":flowrates_8,"flowrate_9":flowrates_5
266         dict1 = {"flowrate_4":flowrates_4,"flowrate_8":flowrates_8,"voltages":vs,"currents":currents,"area-results":results}
267         df2 = pd.DataFrame(dict1)
268         df2.to_csv("output round "+str(i)+".csv")
269 finally:
270     #pump_1.write(b'stop\r')
271     #pump_2.write(b'stop\r')
272     #pump_3.write(b'stop\r')
273     pump_4.write(b'stop\r')
274     #pump_5.write(b'off\r')
275     #pump_6.write(b'off\r')
276     #pump_7.write(b'off\r')
277     pump_8.write(b'off\r')
278     #pump_9.write(b'off\r')
279

```

## AB5.py (for phenyl acetylene)

```
AB5.py x
1
2 """
3 Created on Wed Aug 30 14:48:13 2023
4
5 @author: Admin
6 """
7
8
9 from os import listdir
10 from os.path import isfile, join
11 import serial
12
13 import numpy as np
14 import pandas as pd
15 import time
16 from scipy.integrate import trapz
17
18 #step1: be sure to the address of the files that the ftir data is exported is matching to line 11 (mypath)
19 mypath = "C:\\Users\\Admin\\Desktop\\ruchi\\Exp 2024-04-11 13-33"
20 onlyfiles = [f for f in listdir(mypath) if isfile(join(mypath, f))]
21
22
23 #step2: make sure that pump and the potentiostat is correctly addressed in the Line 16 and 17
24 #pump_1 = serial.Serial("COM10",9600) #hwSyringe Pump
25 #pump_2 = serial.Serial("COM16",9600) #Syringe Pump
26 #pump_3 = serial.Serial("COM19",9600) #Syringe Pump
27 #pump_4 = serial.Serial("COM15",9600) #Syringe Pump
28 #pump_5 = serial.Serial("COM29",9600) #HPLC Pump
29 #pump_6 = serial.Serial("COM28",9600) #HPLC Pump
30 #pump_7 = serial.Serial("COM28",9600) #HPLC Pump
31 #pump_8 = serial.Serial("COM30",9600) #HPLC Pump
32 #pump_9 = serial.Serial("COM5",9600) #HPLC Pump
33 #printer = serial.Serial("COM14", 115200, timeout=1)
34
35
36 r_1=14.25 #radius of syringe used (50ml,14.25|20ml,9.6|10ml,7.25|5ml,6.03|3ml,4/3|1ml,2.39|60ml,13.36)
37 r_2=14.25
38 r_3=14.25
39 r_4=14.25
40 #pump_1_k=(14.25/r_1)**2
41 #pump_2_k=(14.25/r_2)**2
42 #pump_3_k=(14.25/r_3)**2
43 #pump_4_k=(14.25/r_4)**2
44
```

```

45 #step 3: grab the lines from 22 to 90 and press f9
46 def area_under(data,start,end):
47     x = np.flip(data.iloc[start:end,0].to_numpy())
48     y = np.flip(data.iloc[start:end,1].to_numpy())
49     area = trapz(y,x)
50     return np.abs(area)
51
52 def file_namer(num):
53     str1 = str(num)
54     length = int(len((str1)))
55     empt = ''
56     for i in range(5-length):
57         empt = empt+'0'
58
59     return empt+str1
60
61
62 def ftir_extract(filename,init,end):
63
64     filename = filename
65
66     temp_df = pd.read_csv(filename)
67     # nump_df = temp_df.to_numpy()
68     area = area_under(temp_df, init, end)
69     # max_peak = np.max(nump_df[90:120,1])
70     print(area)
71
72     return area
73
74
75 def function(flowrate_1,flowrate_2,flowrate_3,flowrate_4,flowrate_5,flowrate_6,flowrate_7,flowrate_8,flowrate_9,v,i):
76
77     #set the pumps with the flowrate as the desired flowrate for the function
78
79     #fr_1 = flowrate_1*1000*pump_1_k #mL/min to microliter/min and syringe correction factor
80     #fr_2 = flowrate_2*1000*pump_2_k #mL/min to microliter/min and syringe correction factor
81     #fr_3 = flowrate_3*1000*pump_3_k #mL/min to microliter/min and syringe correction factor
82     #fr_4 = flowrate_4*1000*pump_4_k #mL/min to microliter/min and syringe correction factor
83     time.sleep(0.1)
84     fr_5 = flowrate_5*1000 #mL/min
85     pump_5.write(('flow: '+ str(fr_5) + '\r').encode())
86

```



```

87  #time.sleep(0.1)
88  #fr_6=flowrate_6*1000 #converting ml/min to ul/min as pump takes this as input val
89  #pump_6.write(('flow:'+ str(fr_6) + '\r').encode())
90
91  #time.sleep(0.1)
92  #fr_7 = flowrate_7*1000  #ml/min
93  #pump_7.write(('flow:'+ str(fr_7) + '\r').encode())
94
95  time.sleep(0.1)
96  fr_8=flowrate_8*1000 #converting ml/min to ul/min as pump takes this as input val
97  pump_8.write(('flow:'+ str(fr_8) + '\r').encode())
98
99  #time.sleep(0.1)
100 #fr_9=flowrate_9*1000 #converting ml/min to ul/min as pump takes this as input val
101 #pump_9.write(('flow:'+ str(fr_9) + '\r').encode())
102 #time.sleep(0.1)
103
104 #set the com port for potentiostat and set the voltage and current
105 vol = v
106 curr = i
107 port.write(('VOLT '+str(vol)+'\r\n').encode()) #to change the voltge we need to use "VOLT 1" command
108 port.write(('CURR '+str(curr)+'\r\n').encode()) #to change the current we need to use "CURR 1" command
109
110
111 #pumps run
112 pump_5.write(b'on\r')
113 time.sleep(0.1)
114 #pump_6.write(b'on\r')
115 #time.sleep(0.1)
116 #pump_7.write(b'on\r')
117 #time.sleep(0.1)
118 pump_8.write(b'on\r')
119 time.sleep(0.1)
120 #pump_9.write(b'on\r')
121 #time.sleep(0.1)
122
123

```

```

125 #send_syr_command_2(f'fr{fr_2}')
126 #send_syr_command_3(f'fr{fr_3}')
127 #send_syr_command_4(f'fr{fr_4}')
128 time.sleep(15000)
129 def function2():
130     time.sleep(15000) # Last 3 minutes
131     files = [f for f in listdir(mypath) if isfile(join(mypath, f))]
132
133     val = 0
134
135     #change wavelengths as per product here.
136     f_row=17 #first row of range for wavelength as per IR CSV
137     l_row=24 #Last row of range for wavelength as per IR CSV
138
139     val += ftir_extract(files[-1],f_row,l_row)
140     val += ftir_extract(files[-2],f_row,l_row)
141     val += ftir_extract(files[-3],f_row,l_row)
142
143     avg_val = val/3
144
145     return avg_val
146
147
148 #step 4:grab the line 93 and f9
149 from skopt.optimizer import Optimizer
150
151 #def send_syr_command_1(command):
152     #pump_1.write(command.encode() + b'\n') # Send the command to Arduino with a newline character
153     #pump_1.flush() # Flush the serial buffer
154
155 #def send_syr_command_2(command):
156     #pump_2.write(command.encode() + b'\n') # Send the command to Arduino with a newline character
157     #pump_2.flush() # Flush the serial buffer
158
159 #def send_syr_command_3(command):
160     #pump_3.write(command.encode() + b'\n') # Send the command to Arduino with a newline character
161     #pump_3.flush() # Flush the serial buffer
162 #def send_syr_command_4(command):
163     #pump_4.write(command.encode() + b'\n') # Send the command to Arduino with a newline character
164     #pump_4.flush() # Flush the serial buffer
165 #step5:in line 96 we have to define the range that (fLowrate,voltage,current) (from,to) and after (anytime) applying changes you need to grab the line 96 and f9
166 #flowrates are in ml/min, voltage in V, Current in Amperes
167 bounds = [(-10.0,-5.0),(0.1,0.2),(0.1,0.2),(0.1,0.2),(0.012,0.013),(0.1,0.2),(0.1,0.2),(0.012,0.013),(0.1,0.2),(14.49,14.50),(4.99,5.00)]
168 #step 6: grab the line 100 and f9
169 opter =Optimizer(bounds,base_estimator='gp',n_initial_points=3,acq_func="EI",random_state=np.random.randint(3326))

```

```

170
171
172 #step7: to selecte number of the cycles that you have to do the experiment and then grab the line 104 to 121 and f9: the closed loop experimentation is initiated
173 number_of_cycles =5
174 results = []
175 #flowrates_1 = []
176 #flowrates_2 = []
177 #flowrates_3 = []
178 #flowrates_4 = []
179 flowrates_5 = []
180 #flowrates_6 = []
181 #flowrates_7 = []
182 flowrates_8 = []
183 #flowrates_9 = []
184 vs = []
185 currents = []
186
187 product_wavelength=True #set to true if product wavelengths being monitored
188
189 if product_wavelength == True:
190     val=1
191 else:
192     val=-1
193
194 # Step 8: Test Tubes on Printer
195 USE_PRINTER = True
196 REST_HEIGHT = 200
197 X_HOME = -5
198 Y_HOME = 20
199 Z_HOME = 175
200 DEFAULT_PUMP_TIME="1"
201 # Distance between test tubes
202 X_SPACING=20
203 Y_SPACING=20
204 # Number of test tubes
205 X_ROWS = 11
206 Y_COLUMNS = 4
207
208 #-----code for changing column for run---

```

```

209 column_num=5 #column number of run to try from
210 Y_HOME=Y_HOME+(column_num-1)*Y_SPACING
211 #-----
212
213 def send_cmd(cmd):
214     print(cmd)
215     printer.write(f"{cmd}\n".encode("ASCII"))
216
217 def move(x=None, y=None, z=None):
218     s = "G0"
219     if x is not None:
220         s += f"X{x}"
221     if y is not None:
222         s += f"Y{y}"
223     if z is not None:
224         s += f"Z{z}"
225
226     s+= "F5000"
227     send_cmd(s)
228
229 def printer_positions():
230     for j in range(Y_COLUMNS):
231         for i in range(X_ROWS):
232             if j%2==1:
233                 yield (X_HOME + (X_ROWS - 1 - i) * X_SPACING, Y_HOME + j * Y_SPACING, Z_HOME)
234             else:
235                 yield (X_HOME + i * X_SPACING, Y_HOME + j * Y_SPACING, Z_HOME)
236

```

```

237 # Run this.
238 tube_location = list(printer_positions())
239
240 try:
241     for i in range(number_of_cycles):
242         move(*tube_location[2*i])
243         asked = opter.ask()
244         function(asked[0],asked[1],asked[2],asked[3],asked[4],asked[5],asked[6],asked[7],asked[8],asked[9],asked[10])
245         move(*tube_location[2*i+1])
246         told= function2()
247
248         print(f"area under the curve in the round {i:.2f} = {told:.2f}")
249         opter.tell(asked,-told*val)
250         results.append(told)
251         #flowrates_1.append(asked[0])
252         #flowrates_2.append(asked[1])
253         #flowrates_3.append(asked[2])
254         #flowrates_4.append(asked[3])
255         flowrates_5.append(asked[4])
256         #flowrates_6.append(asked[5])
257         #flowrates_7.append(asked[6])
258         flowrates_8.append(asked[7])
259         #flowrates_9.append(asked[8])
260         vs.append(asked[9])
261         currents.append(asked[10])
262
263         #dict1 = {"flowrate_2":flowrates_2,"flowrate_3":flowrates_3,"flowrate_4":flowrates_4,"flowrate_5":flowrates_5,"flowrate_6":flowrates_6,"flowrate_7":flowrates_7,"flowrate_8":flowrates_8,"flowrate_9":flowrates_9}
264         dict1 = {"flowrate_5":flowrates_5,"flowrate_8":flowrates_8,"voltages":vs,"currents":currents,"area-results":results}
265         df2 = pd.DataFrame(dict1)
266         df2.to_csv("output round "+str(i)+".csv")
267 finally:
268     #pump_1.write(b'stop\r')
269     #pump_2.write(b'stop\r')
270     #pump_3.write(b'stop\r')
271     #pump_4.write(b'stop\r')
272     pump_5.write(b'off\r')
273     #pump_6.write(b'off\r')
274     #pump_7.write(b'off\r')
275     pump_8.write(b'off\r')
276     #pump_9.write(b'off\r')
277

```

## AB6.py (for acetonitrile)

```
AB6.py x
1
2 """
3 Created on Wed Aug 30 14:48:13 2023
4
5 @author: Admin
6 """
7
8
9 from os import listdir
10 from os.path import isfile, join
11 import serial
12
13 import numpy as np
14 import pandas as pd
15 import time
16 from scipy.integrate import trapz
17
18 #step1: be sure to the address of the files that the ftir data is exported is matching to line 11 (mypath)
19 mypath = "C:\\Users\\Admin\\Desktop\\ruchi\\Exp 2024-04-11 13-46"
20 onlyfiles = [f for f in listdir(mypath) if isfile(join(mypath, f))]
21
22
23 #step2: make sure that pump and the potentiostat is correctly addressed in the line 16 and 17
24 #pump_1 = serial.Serial("COM10",9600) #hwSyringe Pump
25 #pump_2 = serial.Serial("COM16",9600) #Syringe Pump
26 #pump_3 = serial.Serial("COM19",9600) #Syringe Pump
27 #pump_4 = serial.Serial("COM15",9600) #Syringe Pump
28 #pump_5 = serial.serial_for_url("COM29",9600) #HPLC Pump LAN
29 pump_6 = serial.serial_for_url("socket://169.254.189.57:10001",9600)
30 port = serial.Serial("COM1",115200)
31 #pump_7 = serial.Serial("COM28",9600) #HPLC Pump
32 pump_8 = serial.Serial("COM30",9600) #HPLC Pump
33 #pump_9 = serial.Serial("COM5",9600) #HPLC Pump
34 printer = serial.Serial("COM14", 115200, timeout=1)
35
36 r_1=14.25 #radius of syringe used (50ml,14.25|20ml,9.6|10ml,7.25|5ml,6.03|3ml,4/3|1ml,2.39|60ml,13.36)
37 r_2=14.25
38 r_3=14.25
39 r_4=14.25
40 #pump_1_k=(14.25/r_1)**2
41 #pump_2_k=(14.25/r_2)**2
42 #pump_3_k=(14.25/r_3)**2
43 #pump_4_k=(14.25/r_4)**2
44
```

```

45 #step 3: grab the lines from 22 to 90 and press f9
46 def area_under(data,start,end):
47     x = np.flip(data.iloc[start:end,0].to_numpy())
48     y = np.flip(data.iloc[start:end,1].to_numpy())
49     area = trapz(y,x)
50     return np.abs(area)
51
52 def file_namer(num):
53     str1 = str(num)
54     length = int(len((str1)))
55     empt = ''
56     for i in range(5-length):
57         empt = empt+'0'
58
59     return empt+str1
60
61
62 def ftir_extract(filename,init,end):
63
64     filename = filename
65
66     temp_df = pd.read_csv(filename)
67     # nump_df = temp_df.to_numpy()
68     area = area_under(temp_df, init, end)
69     # max_peak = np.max(nump_df[90:120,1])
70     print(area)
71
72     return area
73
74
75 def function(flowrate_1,flowrate_2,flowrate_3,flowrate_4,flowrate_5,flowrate_6,flowrate_7,flowrate_8,flowrate_9,v,i):
76
77     #set the pumps with the flowrate as the desired flowrate for the function
78
79     #fr_1 = flowrate_1*1000*pump_1_k #mL/min to microliter/min and syringe correction factor
80     #fr_2 = flowrate_2*1000*pump_2_k #mL/min to microliter/min and syringe correction factor
81     #fr_3 = flowrate_3*1000*pump_3_k #mL/min to microliter/min and syringe correction factor
82     #fr_4 = flowrate_4*1000*pump_4_k #mL/min to microliter/min and syringe correction factor
83     #time.sleep(0.1)
84     #fr_5 = flowrate_5*1000 #mL/min
85     #pump_5.write(('flow:'+ str(fr_5) + '\r').encode())
86

```

```

87  time.sleep(0.1)
88  fr_6=flowrate_6*1000 #converting ml/min to ul/min as pump takes this as input val
89  pump_6.write(('flow:'+ str(fr_6) + '\r').encode())
90
91  #time.sleep(0.1)
92  #fr_7 = flowrate_7*1000  #ml/min
93  #pump_7.write(('flow:'+ str(fr_7) + '\r').encode())
94
95  time.sleep(0.1)
96  fr_8=flowrate_8*1000 #converting ml/min to ul/min as pump takes this as input val
97  pump_8.write(('flow:'+ str(fr_8) + '\r').encode())
98
99  #time.sleep(0.1)
100 #fr_9=flowrate_9*1000 #converting ml/min to ul/min as pump takes this as input val
101 #pump_9.write(('flow:'+ str(fr_9) + '\r').encode())
102 #time.sleep(0.1)
103
104 #set the com port for potentiostat and set the voltage and current
105 vol = v
106 curr = i
107 port.write(('VOLT '+str(vol)+'\r\n').encode()) #to change the vltge we need to use "VOLT 1" command
108 port.write(('CURR '+str(curr)+'\r\n').encode()) #to change the current we need to use "CURR 1" command
109
110
111 #pumps run
112 #pump_5.write(b'on\r')
113 #time.sleep(0.1)
114 pump_6.write(b'on\r')
115 time.sleep(0.1)
116 #pump_7.write(b'on\r')
117 #time.sleep(0.1)
118 pump_8.write(b'on\r')
119 time.sleep(0.1)
120 #pump_9.write(b'on\r')
121 #time.sleep(0.1)
122
123

```



```

124 #send_syr_command_1(f'fr{fr_1}')
125 #send_syr_command_2(f'fr{fr_2}')
126 #send_syr_command_3(f'fr{fr_3}')
127 #send_syr_command_4(f'fr{fr_4}')
128 time.sleep(8400)
129 def function2():
130     time.sleep(8400) # Last 3 minutes
131     files = [f for f in listdir(mypath) if isfile(join(mypath, f))]
132
133     val = 0
134
135     #change wavelengths as per product here.
136     f_row=17 #first row of range for wavelength as per IR CSV
137     l_row=24 #Last row of range for wavelength as per IR CSV
138
139     val += ftir_extract(files[-1],f_row,l_row)
140     val += ftir_extract(files[-2],f_row,l_row)
141     val += ftir_extract(files[-3],f_row,l_row)
142
143     avg_val = val/3
144
145     return avg_val
146
147
148 #step 4:grab the line 93 and f9
149 from skopt.optimizer import Optimizer
150
151 #def send_syr_command_1(command):
152     #pump_1.write(command.encode() + b'\n') # Send the command to Arduino with a newline character
153     #pump_1.flush() # Flush the serial buffer
154
155 #def send_syr_command_2(command):
156     #pump_2.write(command.encode() + b'\n') # Send the command to Arduino with a newline character
157     #pump_2.flush() # Flush the serial buffer
158

```

```

159 #def send_syr_command_3(command):
160     #pump_3.write(command.encode() + b'\n') # Send the command to Arduino with a newline character
161     #pump_3.flush() # Flush the serial buffer
162 #def send_syr_command_4(command):
163     #pump_4.write(command.encode() + b'\n') # Send the command to Arduino with a newline character
164     #pump_4.flush() # Flush the serial buffer
165 #step5: in line 96 we have to define the range that (flowrate,voltage,current) (from,to) and after (anytime) applying changes you need to grab the line 96 and f9
166 #flowrates are in ml/min, voltage in V, Current in Ampere
167 bounds = [(-10.0,-5.0),(0.1,0.2),(0.1,0.2),(0.1,0.2),(0.1,0.2),(0.029,0.030),(0.1,0.2),(0.029,0.030),(0.1,0.2),(14.49,14.50),(4.99,5.00)]
168 #step 6: grab the line 100 and f9
169 opter =Optimizer(bounds,base_estimator='gp',n_initial_points=3,acq_func="EI",random_state=np.random.randint(3326))
170
171
172 #step7: to selecte number of the cycles that you have to do the experiment and then grab the line 104 to 121 and f9: the closed loop experimentation is initiated
173 number_of_cycles =5
174 results = []
175 #flowrates_1 = []
176 #flowrates_2 = []
177 #flowrates_3 = []
178 #flowrates_4 = []
179 #flowrates_5 = []
180 flowrates_6 = []
181 #flowrates_7 = []
182 flowrates_8 = []
183 #flowrates_9 = []
184 vs = []
185 currents = []
186
187 product_wavelength=True #set to true if product wavelengths being monitored
188
189 if product_wavelength == True:
190     val=1
191 else:
192     val=-1
193

```

```

194 # Step 8: Test Tubes on Printer
195 USE_PRINTER = True
196 REST_HEIGHT = 200
197 X_HOME = -5
198 Y_HOME = 20
199 Z_HOME = 175
200 DEFAULT_PUMP_TIME="1"
201 # Distance between test tubes
202 X_SPACING=20
203 Y_SPACING=20
204 # Number of test tubes
205 X_ROWS = 11
206 Y_COLUMNS = 4
207
208 #-----code for changing column for run---
209 column_num=6 #column number of run to try from
210 Y_HOME=Y_HOME+(column_num-1)*Y_SPACING
211 #-----
212
213 def send_cmd(cmd):
214     print(cmd)
215     printer.write(f"{cmd}\n".encode("ASCII"))
216
217 def move(x=None, y=None, z=None):
218     s = "G0"
219     if x is not None:
220         s += f"X{x}"
221     if y is not None:
222         s += f"Y{y}"
223     if z is not None:
224         s += f"Z{z}"
225
226     s+= "F5000"
227     send_cmd(s)
228
229 def printer_positions():
230     for j in range(Y_COLUMNS):
231         for i in range(X_ROWS):
232             if j%2==1:
233                 yield (X_HOME + (X_ROWS - 1 - i) * X_SPACING, Y_HOME + j * Y_SPACING, Z_HOME)
234             else:
235                 yield (X_HOME + i * X_SPACING, Y_HOME + j * Y_SPACING, Z_HOME)
236

```

```

237 # Run this.
238 tube_location = list(printer_positions())
239
240 try:
241     for i in range(number_of_cycles):
242         move(*tube_location[2*i])
243         asked = opter.ask()
244         function(asked[0],asked[1],asked[2],asked[3],asked[4],asked[5],asked[6],asked[7],asked[8],asked[9],asked[10])
245         move(*tube_location[2*i+1])
246         told= function2()
247
248         print(f"area under the curve in the round {i:.2f} = {told:.2f}")
249         opter.tell(asked,-told*val)
250         results.append(told)
251         #flowrates_1.append(asked[0])
252         #flowrates_2.append(asked[1])
253         #flowrates_3.append(asked[2])
254         #flowrates_4.append(asked[3])
255         #flowrates_5.append(asked[4])
256         flowrates_6.append(asked[5])
257         #flowrates_7.append(asked[6])
258         flowrates_8.append(asked[7])
259         #flowrates_9.append(asked[8])
260         vs.append(asked[9])
261         currents.append(asked[10])
262
263         #dict1 = {"flowrate_2":flowrates_2,"flowrate_3":flowrates_3,"flowrate_4":flowrates_4,"flowrate_5":flowrates_5,"flowrate_6":flowrates_6,"flowrate_7":flowrates_7,"flowrate_8":flowrates_8,"flowrate_9":flowrates_9
264         dict1 = {"flowrate_6":flowrates_6,"flowrate_8":flowrates_8,"voltages":vs,"currents":currents,"area-results":results}
265         df2 = pd.DataFrame(dict1)
266         df2.to_csv("output round "+str(i)+".csv")
267 finally:
268     #pump_1.write(b'stop\r')
269     #pump_2.write(b'stop\r')
270     #pump_3.write(b'stop\r')
271     #pump_4.write(b'stop\r')
272     #pump_5.write(b'off\r')
273     pump_6.write(b'off\r')
274     #pump_7.write(b'off\r')
275     pump_8.write(b'off\r')
276     #pump_9.write(b'off\r')
277

```

## AB7.py (for diazoetherate)

```
AB7.py
1
2 """
3 Created on Wed Aug 30 14:48:13 2023
4
5 @author: Admin
6 """
7
8
9 from os import listdir
10 from os.path import isfile, join
11 import serial
12
13 import numpy as np
14 import pandas as pd
15 import time
16 from scipy.integrate import trapz
17
18 #step1: be sure to the address of the files that the ftir data is exported is matching to line 11 (mypath)
19 mypath = "C:\\Users\\Admin\\Desktop\\ruchi\\Exp 2024-04-11 13-57"
20 onlyfiles = [f for f in listdir(mypath) if isfile(join(mypath, f))]
21
22
23 #step2: make sure that pump and the potentiostat is correctly addressed in the line 16 and 17
24 #pump_1 = serial.Serial("COM10",9600) #hwSyringe Pump
25 #pump_2 = serial.Serial("COM16",9600) #Syringe Pump
26 #pump_3 = serial.Serial("COM19",9600) #Syringe Pump
27 #pump_4 = serial.Serial("COM15",9600) #Syringe Pump
28 #pump_5 = serial.serial_for_url("COM29",9600) #HPLC Pump LAN
29 #pump_6 = serial.serial_for_url("socket://169.254.225.18:10001",9600)
30 port = serial.Serial("COM1",115200)
31 pump_7 = serial.Serial("COM28",9600) #HPLC Pump
32 pump_8 = serial.Serial("COM30",9600) #HPLC Pump
33 #pump_9 = serial.Serial("COM5",9600) #HPLC Pump
34 printer = serial.Serial("COM14", 115200, timeout=1)
35
36 r_1=14.25 #radius of syringe used (50ml,14.25|20ml,9.6|10ml,7.25|5ml,6.03|3ml,4/3|1ml,2.39|60ml,13.36)
37 r_2=14.25
38 r_3=14.25
39 r_4=14.25
40 #pump_1_r=(14.25/r_1)**2
41 #pump_2_r=(14.25/r_2)**2
42 #pump_3_r=(14.25/r_3)**2
43 #pump_4_r=(14.25/r_4)**2
44
```

```

45 #step 3: grab the lines from 22 to 90 and press f9
46 def area_under(data,start,end):
47     x = np.flip(data.iloc[start:end,0].to_numpy())
48     y = np.flip(data.iloc[start:end,1].to_numpy())
49     area = trapz(y,x)
50     return np.abs(area)
51
52 def file_namer(num):
53     str1 = str(num)
54     length = int(len((str1)))
55     empt = ''
56     for i in range(5-length):
57         empt = empt+'0'
58
59     return empt+str1
60
61
62 def ftir_extract(filename,init,end):
63
64     filename = filename
65
66     temp_df = pd.read_csv(filename)
67     # nump_df = temp_df.to_numpy()
68     area = area_under(temp_df, init, end)
69     # max_peak = np.max(nump_df[90:120,1])
70     print(area)
71
72     return area
73
74
75 def function(flowrate_1,flowrate_2,flowrate_3,flowrate_4,flowrate_5,flowrate_6,flowrate_7,flowrate_8,flowrate_9,v,i):
76
77     #set the pumps with the flowrate as the desired flowrate for the function
78
79     #fr_1 = flowrate_1*1000*pump_1_k #mL/min to microliter/min and syringe correction factor
80     #fr_2 = flowrate_2*1000*pump_2_k #mL/min to microliter/min and syringe correction factor
81     #fr_3 = flowrate_3*1000*pump_3_k #mL/min to microliter/min and syringe correction factor
82     #fr_4 = flowrate_4*1000*pump_4_k #mL/min to microliter/min and syringe correction factor
83     #time.sleep(0.1)
84     #fr_5 = flowrate_5*1000 #mL/min
85     #pump_5.write(('flow:'+ str(fr_5) + '\r').encode())
86

```

```

87  #time.sleep(0.1)
88  #fr_6=flowrate_6*1000 #converting ml/min to ul/min as pump takes this as input val
89  #pump_6.write(('flow:'+ str(fr_6) + '\r').encode())
90
91  time.sleep(0.1)
92  fr_7 = flowrate_7*1000  #ml/min
93  pump_7.write(('flow:'+ str(fr_7) + '\r').encode())
94
95  time.sleep(0.1)
96  fr_8=flowrate_8*1000 #converting ml/min to ul/min as pump takes this as input val
97  pump_8.write(('flow:'+ str(fr_8) + '\r').encode())
98
99  #time.sleep(0.1)
100 #fr_9=flowrate_9*1000 #converting ml/min to ul/min as pump takes this as input val
101 #pump_9.write(('flow:'+ str(fr_9) + '\r').encode())
102 #time.sleep(0.1)
103
104 #set the com port for potentiostat and set the voltage and current
105 vol = v
106 curr = i
107 port.write(('VOLT '+str(vol)+'\r\n').encode())  #to change the vltge we need to use "VOLT 1" command
108 port.write(('CURR '+str(curr)+'\r\n').encode())  #to change the current we need to use "CURR 1" command
109
110
111 #pumps run
112 #pump_5.write(b'on\r')
113 #time.sleep(0.1)
114 #pump_6.write(b'on\r')
115 #time.sleep(0.1)
116 pump_7.write(b'on\r')
117 time.sleep(0.1)
118 pump_8.write(b'on\r')
119 time.sleep(0.1)
120 #pump_9.write(b'on\r')
121 #time.sleep(0.1)
122

```

```

123 #send_syr_command_1(f'fr{fr_1}')
124 #send_syr_command_2(f'fr{fr_2}')
125 #send_syr_command_3(f'fr{fr_3}')
126 #send_syr_command_4(f'fr{fr_4}')
127 time.sleep(6600)
128 def function2():
129     time.sleep(6600) # Last 3 minutes
130     files = [f for f in listdir(mypath) if isfile(join(mypath, f))]
131
132     val = 0
133
134     #change wavelengths as per product here.
135     f_row=17 #first row of range for wavelength as per IR CSV
136     l_row=24 #last row of range for wavelength as per IR CSV
137
138     val += ftir_extract(files[-1],f_row,l_row)
139     val += ftir_extract(files[-2],f_row,l_row)
140     val += ftir_extract(files[-3],f_row,l_row)
141
142     avg_val = val/3
143
144     return avg_val
145
146
147 #step 4:grab the line 93 and f9
148 from skopt.optimizer import Optimizer
149
150 #def send_syr_command_1(command):
151     #pump_1.write(command.encode() + b'\n') # Send the command to Arduino with a newline character
152     #pump_1.flush() # Flush the serial buffer
153
154 #def send_syr_command_2(command):
155     #pump_2.write(command.encode() + b'\n') # Send the command to Arduino with a newline character
156     #pump_2.flush() # Flush the serial buffer
157
158 #def send_syr_command_3(command):
159     #pump_3.write(command.encode() + b'\n') # Send the command to Arduino with a newline character
160     #pump_3.flush() # Flush the serial buffer
161 #def send_syr_command_4(command):

```



```

162 #pump_4.write(command.encode() + b'\n') # Send the command to Arduino with a newline character
163 #pump_4.flush() # Flush the serial buffer
164 #step5: in line 96 we have to define the range that (flowrate,voltage,current) (from,to) and after (anytime) applying changes you need to grab the line 96 and f9
165 #flowrates are in mL/min, voltage in V, Current in Ampere
166 bounds = [(-10.0,-5.0),(0.1,0.2),(0.1,0.2),(0.1,0.2),(0.1,0.2),(0.039,0.040),(0.039,0.040),(0.1,0.2),(14.49,14.50),(4.99,5.00)]
167 #step 6: grab the line 100 and f9
168 opter =Optimizer(bounds,base_estimator='gp',n_initial_points=3,acq_func="EI",random_state=np.random.randint(3326))
169
170
171 #step7: to selecte number of the cycles that you have to do the experiment and then grab the line 104 to 121 and f9: the closed loop experimentation is initiated
172 number_of_cycles =5 #max is 5 cycles for 10 tet tubes
173
174 results = []
175 #flowrates_1 = []
176 #flowrates_2 = []
177 #flowrates_3 = []
178 #flowrates_4 = []
179 #flowrates_5 = []
180 #flowrates_6 = []
181 flowrates_7 = []
182 flowrates_8 = []
183 #flowrates_9 = []
184 vs = []
185 currents = []
186
187 product_wavelength=True #set to true if product wavelengths being monitored
188
189 if product_wavelength == True:
190     val=1
191 else:
192     val=-1
193
194
195
196 # Step 8: Test Tubes on Printer
197 USE_PRINTER = True
198 REST_HEIGHT = 200
199 X_HOME = -5
200 Y_HOME = 20
201 Z_HOME = 175
202 DEFAULT_PUMP_TIME="1"

```

```

203 # Distance between test tubes
204 X_SPACING=20
205 Y_SPACING=20
206 # Number of test tubes
207 X_ROWS = 11
208 Y_COLUMNS = 4
209
210 #-----code for changing column for run---
211 column_num=7 #column number of run to try from
212 Y_HOME=Y_HOME+(column_num-1)*Y_SPACING
213 #-----
214
215
216 def send_cmd(cmd):
217     print(cmd)
218     printer.write(f"{cmd}\n".encode("ASCII"))
219
220 def move(x=None, y=None, z=None):
221     s = "G0"
222     if x is not None:
223         s += f"X{x}"
224     if y is not None:
225         s += f"Y{y}"
226     if z is not None:
227         s += f"Z{z}"
228
229     s+= "F5000"
230     send_cmd(s)
231
232 def printer_positions():
233     for j in range(Y_COLUMNS):
234         for i in range(X_ROWS):
235             if j%2==1:
236                 yield (X_HOME + (X_ROWS - 1 - i) * X_SPACING, Y_HOME + j * Y_SPACING, Z_HOME)
237             else:
238                 yield (X_HOME + i * X_SPACING, Y_HOME + j * Y_SPACING, Z_HOME)
239
240 # Run this.
241 tube_location = list(printer_positions())
242

```

```

243 try:
244     for i in range(number_of_cycles):
245         move(*tube_location[2*i])
246         asked = opter.ask()
247         function(asked[0],asked[1],asked[2],asked[3],asked[4],asked[5],asked[6],asked[7],asked[8],asked[9],asked[10])
248         move(*tube_location[2*i+1])
249         told= function2()
250
251         print(f"area under the curve in the round {i:.2f} = {told:.2f}")
252         opter.tell(asked,-told*val)
253         results.append(told)
254         #flowrates_1.append(asked[0])
255         #flowrates_2.append(asked[1])
256         #flowrates_3.append(asked[2])
257         #flowrates_4.append(asked[3])
258         #flowrates_5.append(asked[4])
259         #flowrates_6.append(asked[5])
260         flowrates_7.append(asked[6])
261         flowrates_8.append(asked[7])
262         #flowrates_9.append(asked[8])
263         vs.append(asked[9])
264         currents.append(asked[10])
265
266         #dict1 = {"flowrate_2":flowrates_2,"flowrate_3":flowrates_3,"flowrate_4":flowrates_4,"flowrate_5":flowrates_5,"flowrate_6":flowrates_6,"flowrate_7":flowrates_7,"flowrate_8":flowrates_8,"flowrate_9":flowrates_9
267         dict1 = {"flowrate_7":flowrates_7,"flowrate_8":flowrates_8,"voltages":vs,"currents":currents,"area-results":results}
268         df2 = pd.DataFrame(dict1)
269         df2.to_csv("output round "+str(i)+".csv")
270 finally:
271     #pump_1.write(b'stop\r')
272     #pump_2.write(b'stop\r')
273     #pump_3.write(b'stop\r')
274     #pump_4.write(b'stop\r')
275     #pump_5.write(b'off\r')
276     #pump_6.write(b'off\r')
277     pump_7.write(b'off\r')
278     pump_8.write(b'off\r')
279     #pump_9.write(b'off\r')
280

```

**S10.2.** General procedure of Integrated AI optimized carbene insertion reaction into diazo ester photochemically.

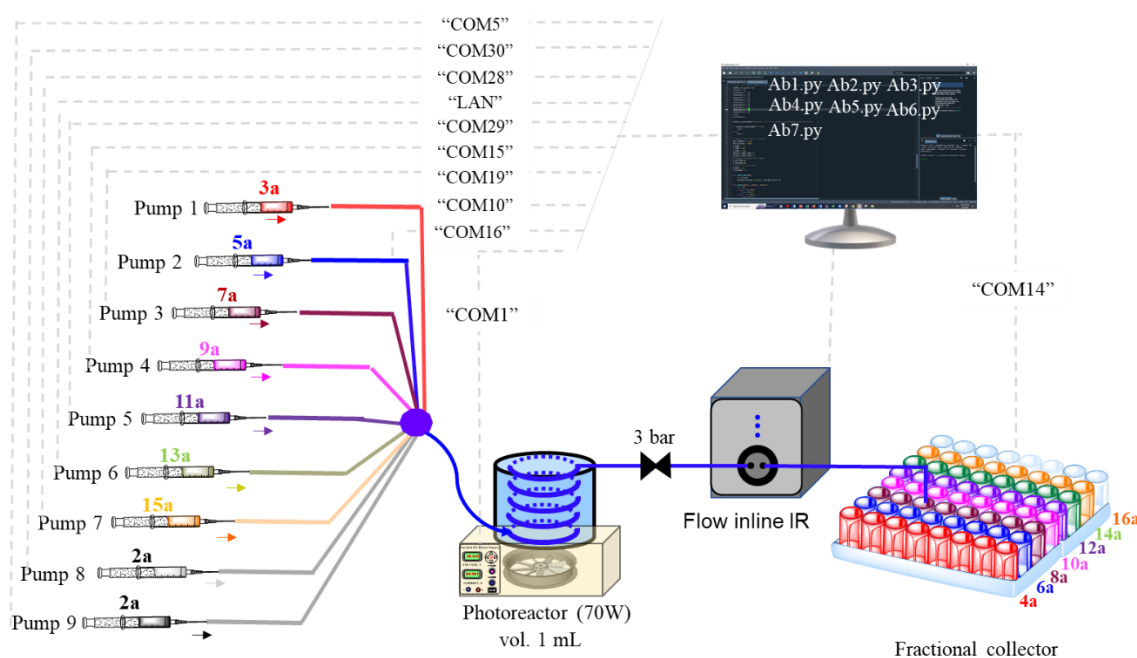

**Figure S55.** Schematic diagram of Integrated AI optimized carbene insertion reaction into diazo ester photochemically.

Our interest turned to integrating our protocol into a unified flow process akin to grafting techniques observed in hibiscus plants. In this process, reminiscent of the grafting of branches onto a common trunk, we maintain the same starting material and combine it with different substrates to yield respective products, each designated with a distinct colour. We coined this process "digichemtree," where we sequentially run seven different reagents, each mixed with the starting material to obtain a single product at a time.

Before commencing the experiment, we prepared 0.1 M stock solutions of compound **2a** in both EtOAc and DCE, each stored in separate conical flasks covered with aluminum foil. Similarly, we prepared 0.2 M stock solutions of compounds **3a**, **5a**, and **7a** in EtOAc, each loaded into syringes and connected to pumps. Additionally, 0.2 M stock solutions of compounds **9a**, **11a**, **13a**, and **15a** in DCE were prepared, also stored in separate conical flasks

and connected to pumps. After ensuring all connections were secure, we checked communication ports with the master computer. Our integrated continuous flow setup, coupled with AI, was now prepared for operation. Upon executing the code AB1.py, pumps 1 and 9 were activated. Pump 1 dispensed the 0.2 M solution of **3a** in EtOAc, while pump 9 in EtOAc dispensed the 0.1 M solution of **2a**, each at an optimized flow rate of 50  $\mu\text{L}/\text{min}$ . The resulting reaction mixture flowed through a 1 mL PFA tubular reactor, exposed to blue LED illumination (70 watts), with a residence time of 10 minutes under 3 bar pressure. Upon completion, the first drop of product emerged, and subsequent solution was collected in individual test tubes over a period of 6000 seconds using tailor made auto fraction collector. Following the first test tube of product, the subsequent ones were reserved for external analysis.

After the successful execution of the AB1.py experiment code, we proceeded to test the AB2.py code. This time, pumps 2 and 9 were activated. Pump 2 delivered the 0.2 M solution of **5a** in EtOAc, while pump 9 dispensed the 0.1 M solution of **2a** in EtOAc, each at an optimized flow rate of 86  $\mu\text{L}/\text{min}$ . The resulting reaction mixture traversed through a 1 mL PFA tubular reactor, subjected to intense blue LED illumination (70 watts), with a residence time of 11 minutes under 3 bar pressure. As the reaction concluded, the initial drop of product appeared, and the ensuing solution was meticulously collected in individual test tubes over a span of 3300 seconds utilizing a tailor-made auto fraction collector. Following the first test tube of product, the subsequent ones were reserved for external analysis.

Energized by the successful outcomes of the preceding experiments, we were keen to explore our AB3.py code for a photochemical N-H insertion reaction. Initiating the AB3.py experiment code prompted pump 3 to dispense the 0.2 M solution of **7a** in EtOAc, while pump 9 delivered the 0.1 M solution of **2a** in EtOAc, each flowing at an optimized rate of 46  $\mu\text{L}/\text{min}$ . The resultant reaction mixture journeyed through a 1 mL PFA tubular reactor, bathed in vibrant blue LED illumination (70 watts), with a residence time of 10.86 minutes under 3 bar pressure.

Upon completion, the droplet of product emerged, and the successive solution was gathered into individual test tubes over a period of 6000 seconds via the tailor-made auto fraction collector. Following the first test tube of product, the subsequent ones were reserved for external analysis.

Having accomplished three successful experimental runs, we were tantalized by the prospect of investigating the feasibility of the remaining experiment codes. We started with clicking on experiment code AB4.py, now pump 4 and pump 8 is activated, pumping the 0.2 M solution of reagent **9a** in DCE with pump 4 and 0.1 M solution of compound **2a** in DCE each flowing at an optimized rate of 15  $\mu\text{L}/\text{min}$ . The resultant reaction mixture journeyed through a 1 mL PFA tubular reactor, bathed in vibrant blue LED illumination (70 watts), with a residence time of 32.0 min under 3 bar pressure. Upon completion, the droplet of product emerged, and the successive solution was gathered into individual test tubes over a period of 15000 seconds via the tailor-made auto fraction collector. Following the first test tube of product, the subsequent ones were reserved for external analysis. Next we have run experiment code AB5.py This time, pumps 5 and 8 were activated. Pump 5 delivered the 0.2 M solution of **11a** in DCE, while pump 8 dispensed the 0.1 M solution of **2a** in DCE, each at an optimized flow rate of 12.5  $\mu\text{L}/\text{min}$ . The resulting reaction mixture traversed through a 1 mL PFA tubular reactor, subjected to intense blue LED illumination (70 watts), with a residence time of 40 min under 3 bar pressure. As the reaction concluded, the initial drop of product appeared, and the ensuing solution was meticulously collected in individual test tubes over a span of 3300 seconds utilizing a tailor-made auto fraction collector. Following the first test tube of product, the subsequent ones were reserved for external analysis.

Then for [3+2] cycloaddition reaction have done utilizing experiment code AB6.py, in which upon executing, pumps 6 and 8 were activated. Pump 6 dispensed the 0.2 M solution of **13a** in DCE, while pump 8 dispensed the 0.1 M solution of **2a** in DCE, each at an optimized flow rate

of 31  $\mu\text{L}/\text{min}$ . The resulting reaction mixture flowed through a 1 mL PFA tubular reactor, exposed to blue LED illumination (70 watts), with a residence time of 16.6 minutes under 3 bar pressure. Upon completion, the first drop of product emerged, and subsequent solution was collected in individual test tubes over a period of 8400 seconds using tailor made auto fraction collector. Following the first test tube of product, the subsequent ones were reserved for external analysis.

In last for cross coupling reaction experiment code AB7.py is subjected and pump 7 and pump 8 is activated, pumping the 0.2 M solution of reagent **15a** in DCE with pump 8 and 0.1 M solution of compound **2a** in DCE each flowing at an optimized rate of 40  $\mu\text{L}/\text{min}$ . The resultant reaction mixture journeyed through a 1 mL PFA tubular reactor, bathed in vibrant blue LED illumination (70 watts), with a residence time of 12.5 minutes under 3 bar pressure. Upon completion, the droplet of product emerged, and the successive solution was gathered into individual test tubes over a period of 6600 seconds via the tailor-made auto fraction collector. Following the first test tube of product, the subsequent ones were reserved for external analysis.

## **S12. Troubleshooting**

Question: Where to buy AI-system for the reaction optimization?

Answer: No need to buy from any place the python code is available in supporting information.

Question: Where to buy the 3D printer and Arduino board?

Answer: We bought through Amazon.

Question: Any other company photo-flow reactor will work?

Answer: Yes, it'll work but need to change the python code accordingly.

Question: Does other tube id work?

Answer: Other higher tube id (e.g., 2-5 mm) also work, but further need to optimize to get the optimal condition.

Question: Does code will work for the production 100 kg scale?

Answer: Yes, it'll work but further auto-optimization may give you better reaction condition.

Question: Does current code will work with any other company hardware set-up?

Answer: Yes, it'll work but slight modification needed in python code.

Question: Can we replace the In-line IR with other analysis unit?

Answer: Yes, you can replace with HPLC, In-line NMR, GC-MS, LC-MS, XAS etc but the analysis code need to rewrite as per the analysis system manual.

Question: Do we need the super computer to run the auto-reaction optimization?

Answer: We don't need any supercomputer. Any normal PC will work for the reaction auto-optimization and on demand synthesis.

Question: Optimization will have effected by the current failure?

Answer: Yes, before starting the experiment make sure system have proper battery back-up.

Question: How many pump we can connect with one AI system?

Answer: Infinite.



### S13. Supplementary references:

- 1 Rana, A., Chauhan, R. & Singh, A. K. Thermal/photochemical micro-flow probe system for direct C–H bond functionalization of biologically active molecules. *React. Chem. Eng.* **9**, 1313-1319, doi:10.1039/D4RE00083H (2024).
- 2 Jurberg, I. D. & Davies, H. M. L. Blue light-promoted photolysis of aryldiazoacetates. *Chem. Sci.* **9**, 5112-5118, doi:10.1039/C8SC01165F (2018).
- 3 Tan, F. *et al.* Asymmetric Catalytic Insertion of  $\alpha$ -Diazo Carbonyl Compounds into O–H Bonds of Carboxylic Acids. *ACS Catal.* **6**, 6930-6934, doi:10.1021/acscatal.6b02184 (2016).
- 4 Keipour, H., Jalba, A., Delage-Laurin, L. & Ollevier, T. Copper-Catalyzed Carbenoid Insertion Reactions of  $\alpha$ -Diazoesters and  $\alpha$ -Diazoketones into Si–H and S–H Bonds. *J. Org. Chem.* **82**, 3000-3010, doi:10.1021/acs.joc.6b02998 (2017).
- 5 Keipour, H., Jalba, A., Tanbouza, N., Carreras, V. & Ollevier, T.  $\alpha$ -Thiocarbonyl synthesis via the FeII-catalyzed insertion reaction of  $\alpha$ -diazocarbonyls into S–H bonds. *Org. Biomol. Chem.* **17**, 3098-3102, doi:10.1039/C9OB00261H (2019).
- 6 Pan, J. B. *et al.* A Spiro Phosphamide Catalyzed Enantioselective Proton Transfer of Ylides in a Free Carbene Insertion into N–H Bonds. *Angew. Chem.* **135**, e202300691 (2023).
- 7 Wang, B., Howard, I. G., Pope, J. W., Conte, E. D. & Deng, Y. Bis(imino) pyridine iron complexes for catalytic carbene transfer reactions. *Chem. Sci.* **10**, 7958-7963 (2019).
- 8 Wang, B., Howard, I. G., Pope, J. W., Conte, E. D. & Deng, Y. Bis(imino)pyridine iron complexes for catalytic carbene transfer reactions. *Chem. Sci.* **10**, 7958-7963, doi:10.1039/C9SC02189B (2019).

- 9 Dasgupta, A. *et al.* Borane-catalyzed stereoselective C–H insertion, cyclopropanation, and ring-opening reactions. *Chem* **6**, 2364-2381 (2020).
- 10 Mancinelli, J. P. & Wilkerson-Hill, S. M. Tris(pentafluorophenyl)borane-Catalyzed Cyclopropanation of Styrenes with Aryldiazoacetates. *ACS Catal.* **10**, 11171-11176, doi:10.1021/acscatal.0c03218 (2020).
- 11 Sharland, J. C. *et al.* Asymmetric synthesis of pharmaceutically relevant 1-aryl-2-heteroaryl- and 1,2-diheteroarylcyclopropane-1-carboxylates. *Chem. Sci.* **12**, 11181-11190, doi:10.1039/D1SC02474D (2021).
- 12 Davies, H. M. & Venkataramani, C. Dirhodium tetraproline-catalyzed asymmetric cyclopropanations with high turnover numbers. *Org. Lett.* **5**, 1403-1406 (2003).
- 13 Singha, S., Buchsteiner, M., Bistoni, G., Goddard, R. & Fürstner, A. A New Ligand Design Based on London Dispersion Empowers Chiral Bismuth–Rhodium Paddlewheel Catalysts. *J. Am. Chem. Soc.* **143**, 5666-5673 (2021).
- 14 Chen, L. *et al.* An Inexpensive and Recyclable Silver-Foil Catalyst for the Cyclopropanation of Alkenes with Diazoacetates under Mechanochemical Conditions. *Angew. Chem. Int. Ed.* **54**, 11084-11087, doi:<https://doi.org/10.1002/anie.201504236> (2015).
- 15 Hommelsheim, R., Guo, Y., Yang, Z., Empel, C. & Koenigs, R. M. Blue-Light-Induced Carbene-Transfer Reactions of Diazoalkanes. *Angew. Chem. Int. Ed.* **58**, 1203-1207, doi:<https://doi.org/10.1002/anie.201811991> (2019).
- 16 Li, C., Zeng, Y. & Wang, J. Au-catalyzed isomerization of cyclopropenes: a novel approach to indene derivatives. *Tetrahedron Lett.* **50**, 2956-2959 (2009).
- 17 Chen, L., Leslie, D., Coleman, M. G. & Mack, J. Recyclable heterogeneous metal foil-catalyzed cyclopropanation of alkynes and diazoacetates under solvent-free

- mechanochemical reaction conditions. *Chem. Sci.* **9**, 4650-4661, doi:10.1039/C8SC00443A (2018).
- 18 Stefkova, K., Heard, M. J., Dasgupta, A. & Melen, R. L. Borane catalysed cyclopropanation of arylacetylenes. *Chem. Comm.* **57**, 6736-6739 (2021).
- 19 Muriel, B. & Waser, J. Azide radical initiated ring opening of cyclopropenes leading to alkenyl nitriles and polycyclic aromatic compounds. *Angew. Chem. Int. Ed.* **60**, 4075-4079 (2021).
- 20 Chuprakov, S., Rubin, M. & Gevorgyan, V. Direct palladium-catalyzed arylation of cyclopropenes. *J. Am. Chem. Soc.* **127**, 3714-3715 (2005).
- 21 Saha, A. *et al.* Photoinduced [3+2] Cycloaddition of Carbenes and Nitriles: A Versatile Approach to Oxazole Synthesis. *Angew. Chem. Int. Ed.* **62**, e202308916, doi:<https://doi.org/10.1002/anie.202308916> (2023).
- 22 Maiti, D., Saha, A., Guin, S., Maiti, D. & Sen, S. Unveiling catalyst-free electro-photochemical reactivity of aryl diazoesters and facile synthesis of oxazoles, imide-fused pyrroles and tetrahydro-epoxy-pyridines via carbene radical anions. *Chem. Sci.* **14**, 6216-6225, doi:10.1039/D3SC00089C (2023).
- 23 Bai, J. *et al.* Visible light-induced synthesis of polysubstituted oxazoles from diazo compounds. *Org. Biomol. Chem.* **21**, 5511-5515, doi:10.1039/D3OB00878A (2023).
- 24 Xiao, T., Mei, M., He, Y. & Zhou, L. Blue light-promoted cross-coupling of aryldiazoacetates and diazocarbonyl compounds. *Chem. Comm.* **54**, 8865-8868, doi:10.1039/C8CC04609C (2018).
- 25 Upp, D. M. *et al.* Engineering Dirhodium Artificial Metalloenzymes for Diazo Coupling Cascade Reactions\*\*. *Angew. Chem. Int. Ed.* **60**, 23672-23677, doi:<https://doi.org/10.1002/anie.202107982> (2021).
