# Supplementary material for: DigiChemTree enables programmable light-induced carbene generation for on demand chemical synthesis
Source: PubMed Central journal article supplement — Commun Chem. 2024 Nov 1;7:251. doi: 10.1038/s42004-024-01330-z (PMC11530455; doi:10.1038/s42004-024-01330-z), 2024-11-01
Supplement: 42004_2024_1330_MOESM3_ESM.pdf [file 42004_2024_1330_MOESM3_ESM.pdf]

## Description of Additional Supplementary Files

**File name:** Supplementary Data

**Description:** Detailed information of experiments

**File name:** Supplementary Data 1

**Description:** NMR spectra

**File name:** Supplementary Data 2

**Description:** Table of acid coupling

**File name:** Supplementary Data 3

**Description:** Table of thiol coupling

**File name:** Supplementary Data 4

**Description:** Table of amine coupling

**File name:** Supplementary Data 5

**Description:** Table of alkene coupling

**File name:** Supplementary Data 6

**Description:** Table of alkyne coupling

**File name:** Supplementary Data 7

**Description:** Table of oxazole formation

**File name:** Supplementary Data 8

**Description:** Table of diazo acetate coupling

**File name:** Supplementary software 1

**Description:** Python code for individual step

**File name:** Supplementary software 2

**Description:** Python code for DigiChemTree

**File name:** Supplementary movie

**Description:** Video of running setup
