# Supplementary material for: DigiChemTree enables programmable light-induced carbene generation for on demand chemical synthesis
Source: PubMed Central journal article supplement — Commun Chem. 2024 Nov 1;7:251. doi: 10.1038/s42004-024-01330-z (PMC11530455; doi:10.1038/s42004-024-01330-z), 2024-11-01
Supplement: 42004_2024_1330_MOESM4_ESM.pdf [file 42004_2024_1330_MOESM4_ESM.pdf]

# Spectra

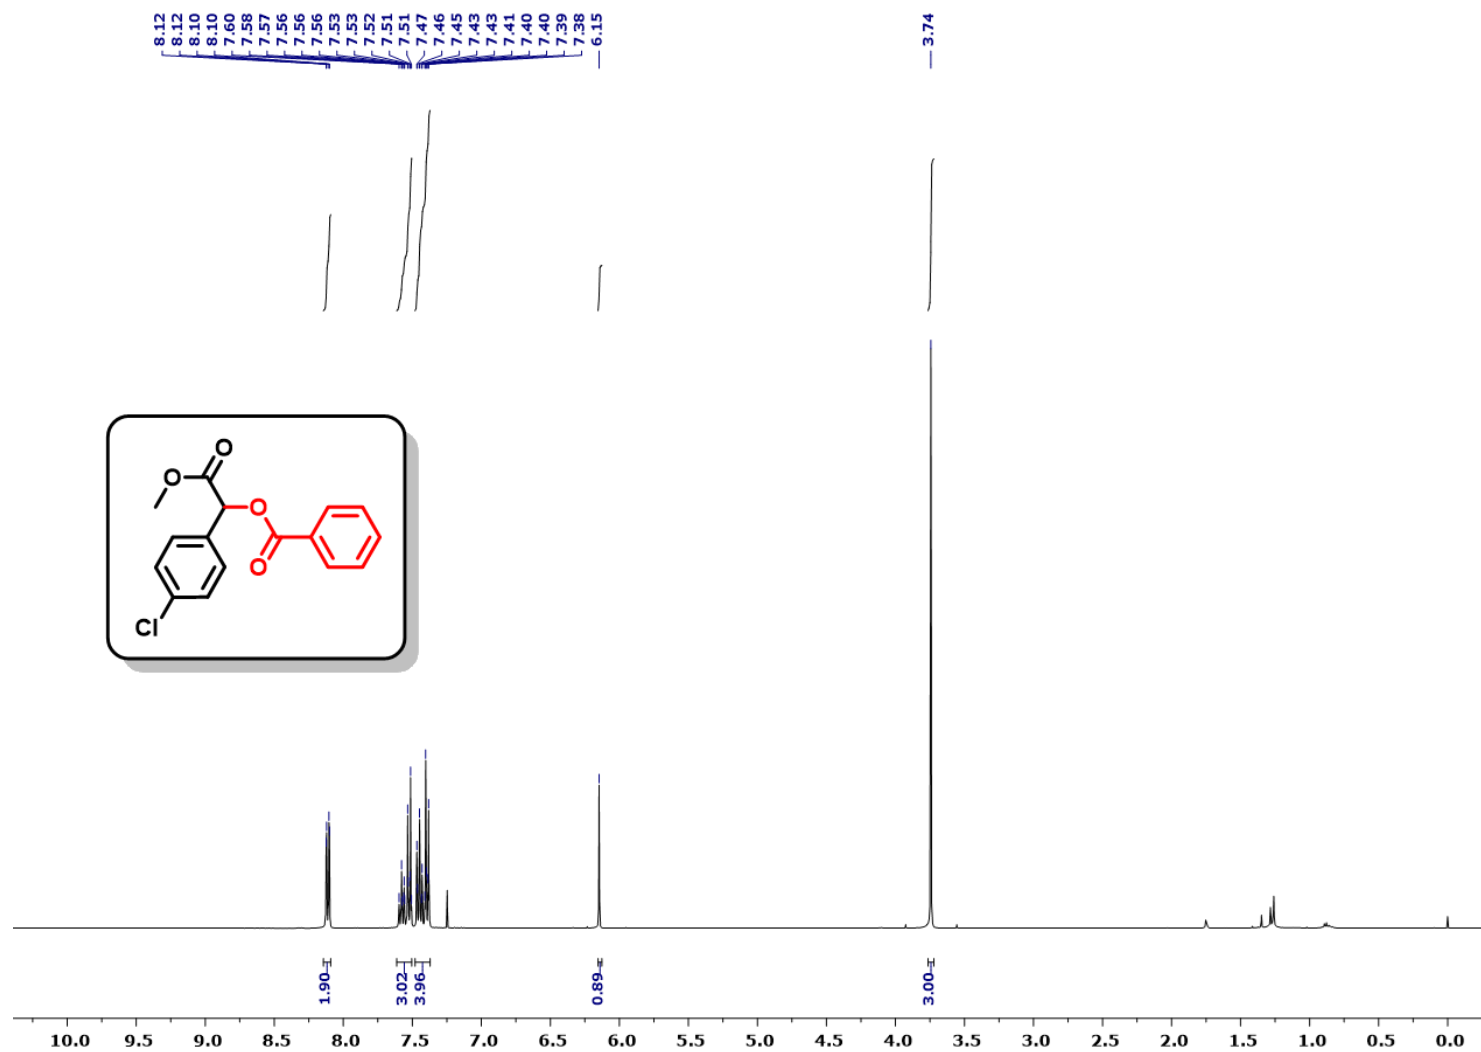

**Fig. S56.** <sup>1</sup>H NMR (400 MHz, CDCl<sub>3</sub>) spectra of 1-(4-chlorophenyl)-2-methoxy-2-oxoethyl benzoate (**4a**).

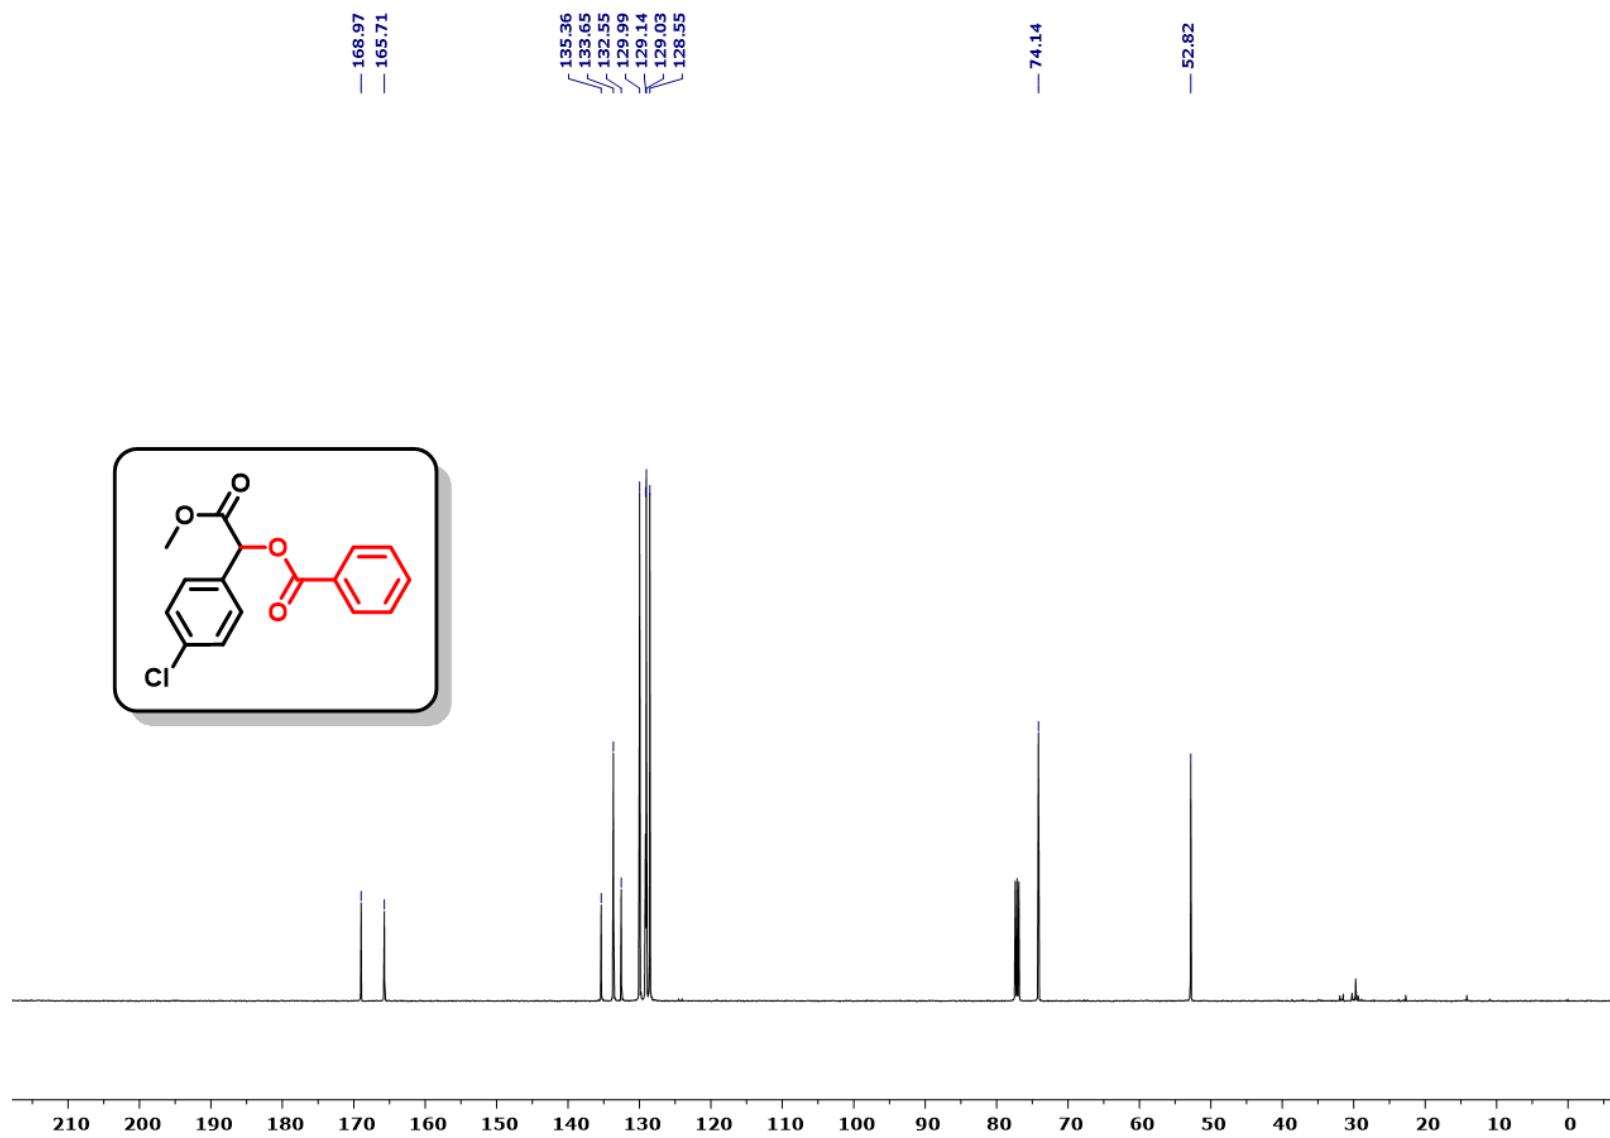

**Fig. S57.** <sup>13</sup>C NMR (126 MHz, CDCl<sub>3</sub>) spectra of 1-(4-chlorophenyl)-2-methoxy-2-oxoethyl benzoate (**4a**).

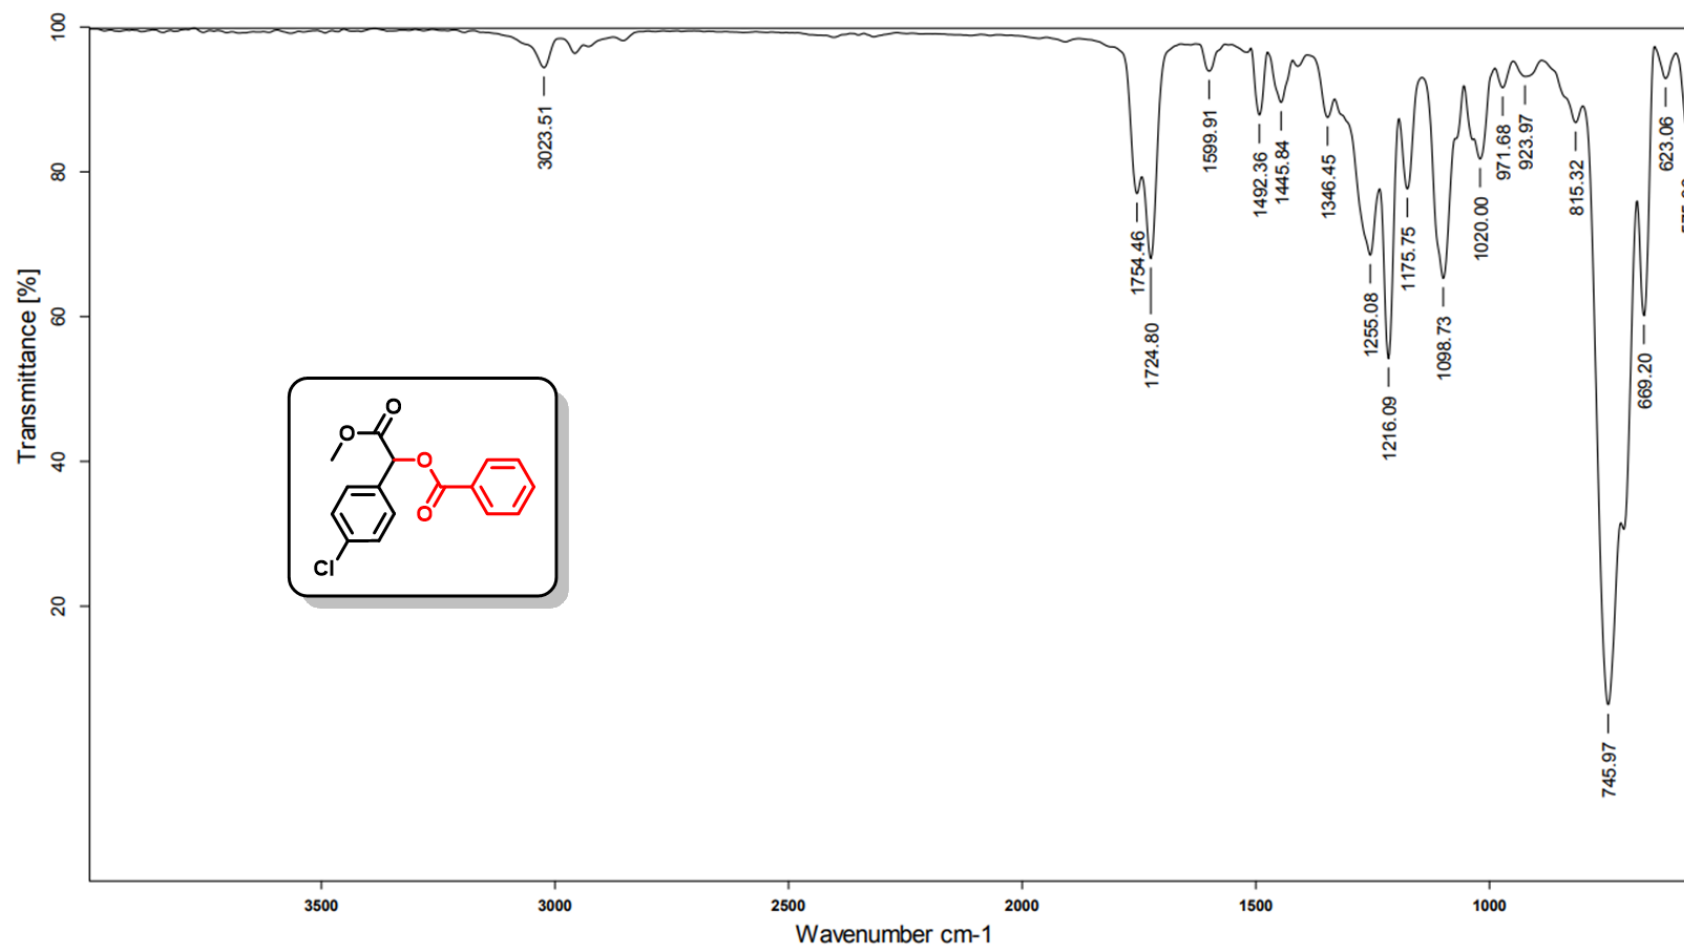

**Fig. S58.** IR spectra of spectra of 1-(4-chlorophenyl)-2-methoxy-2-oxoethyl benzoate (**4a**).

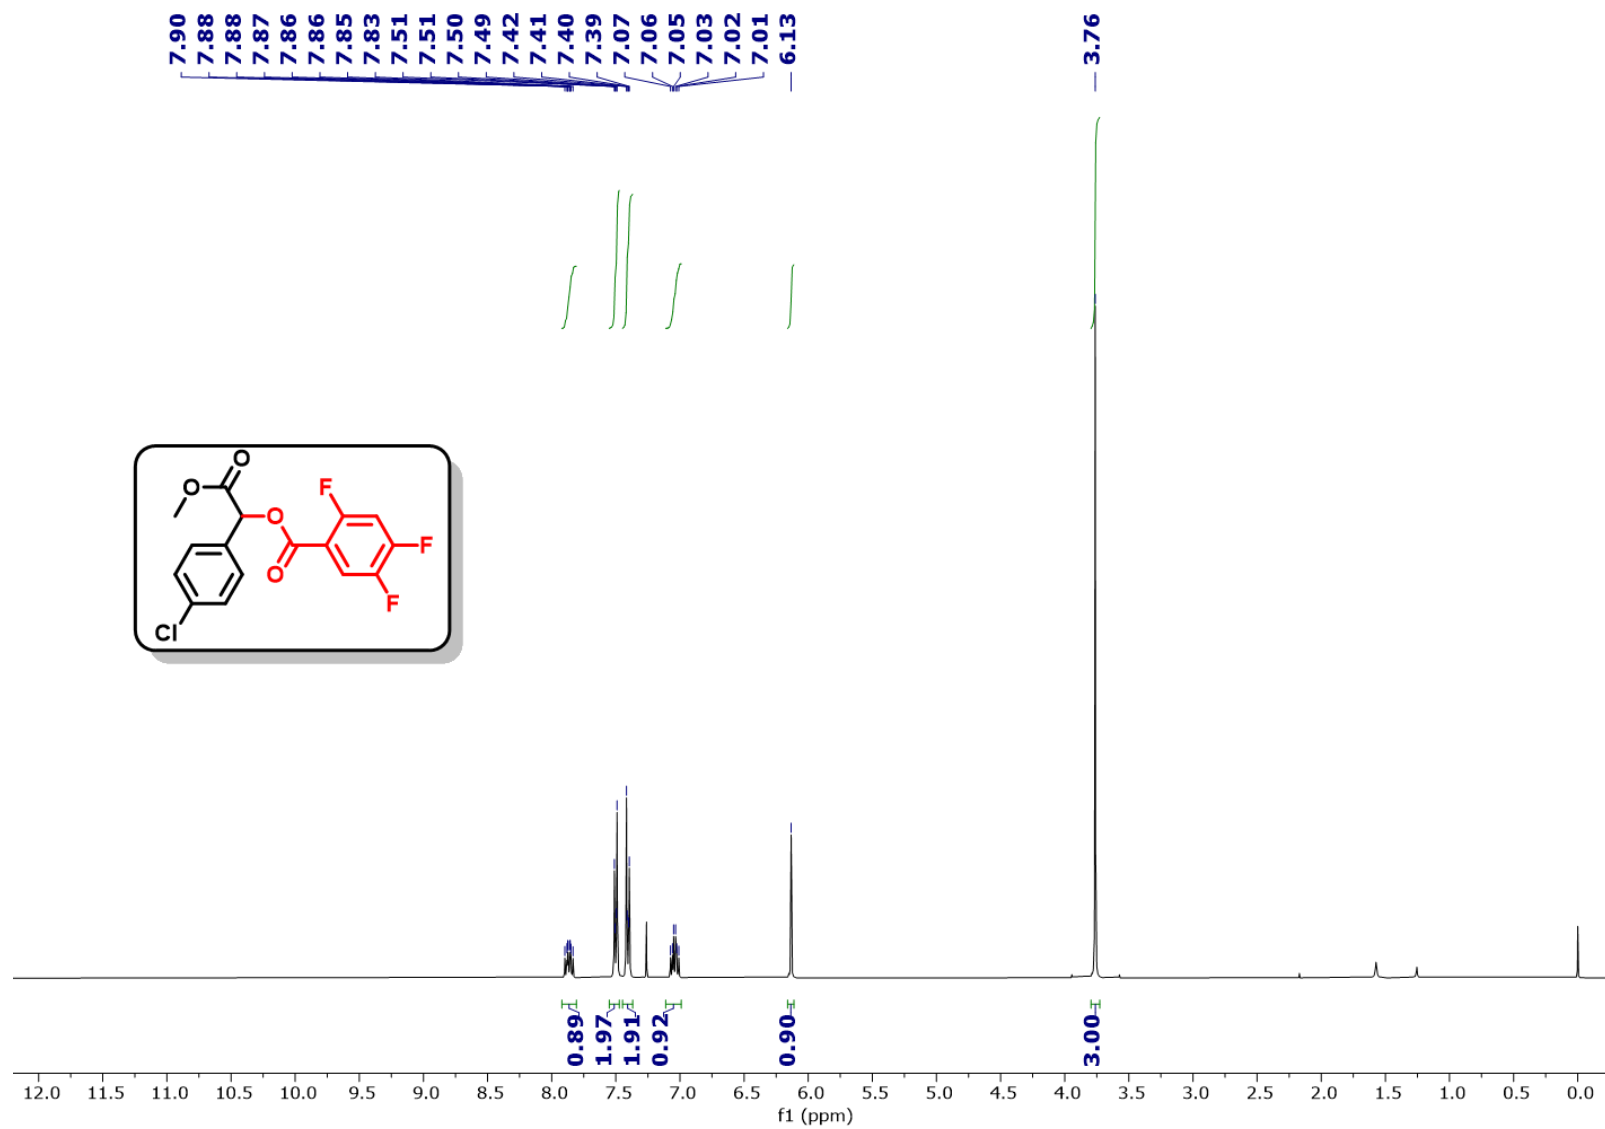

**Fig. S59.** <sup>1</sup>H NMR (400 MHz, CDCl<sub>3</sub>) spectra of 1-(4-chlorophenyl)-2-methoxy-2-oxoethyl 2,4,5-trifluorobenzoate (**4b**).

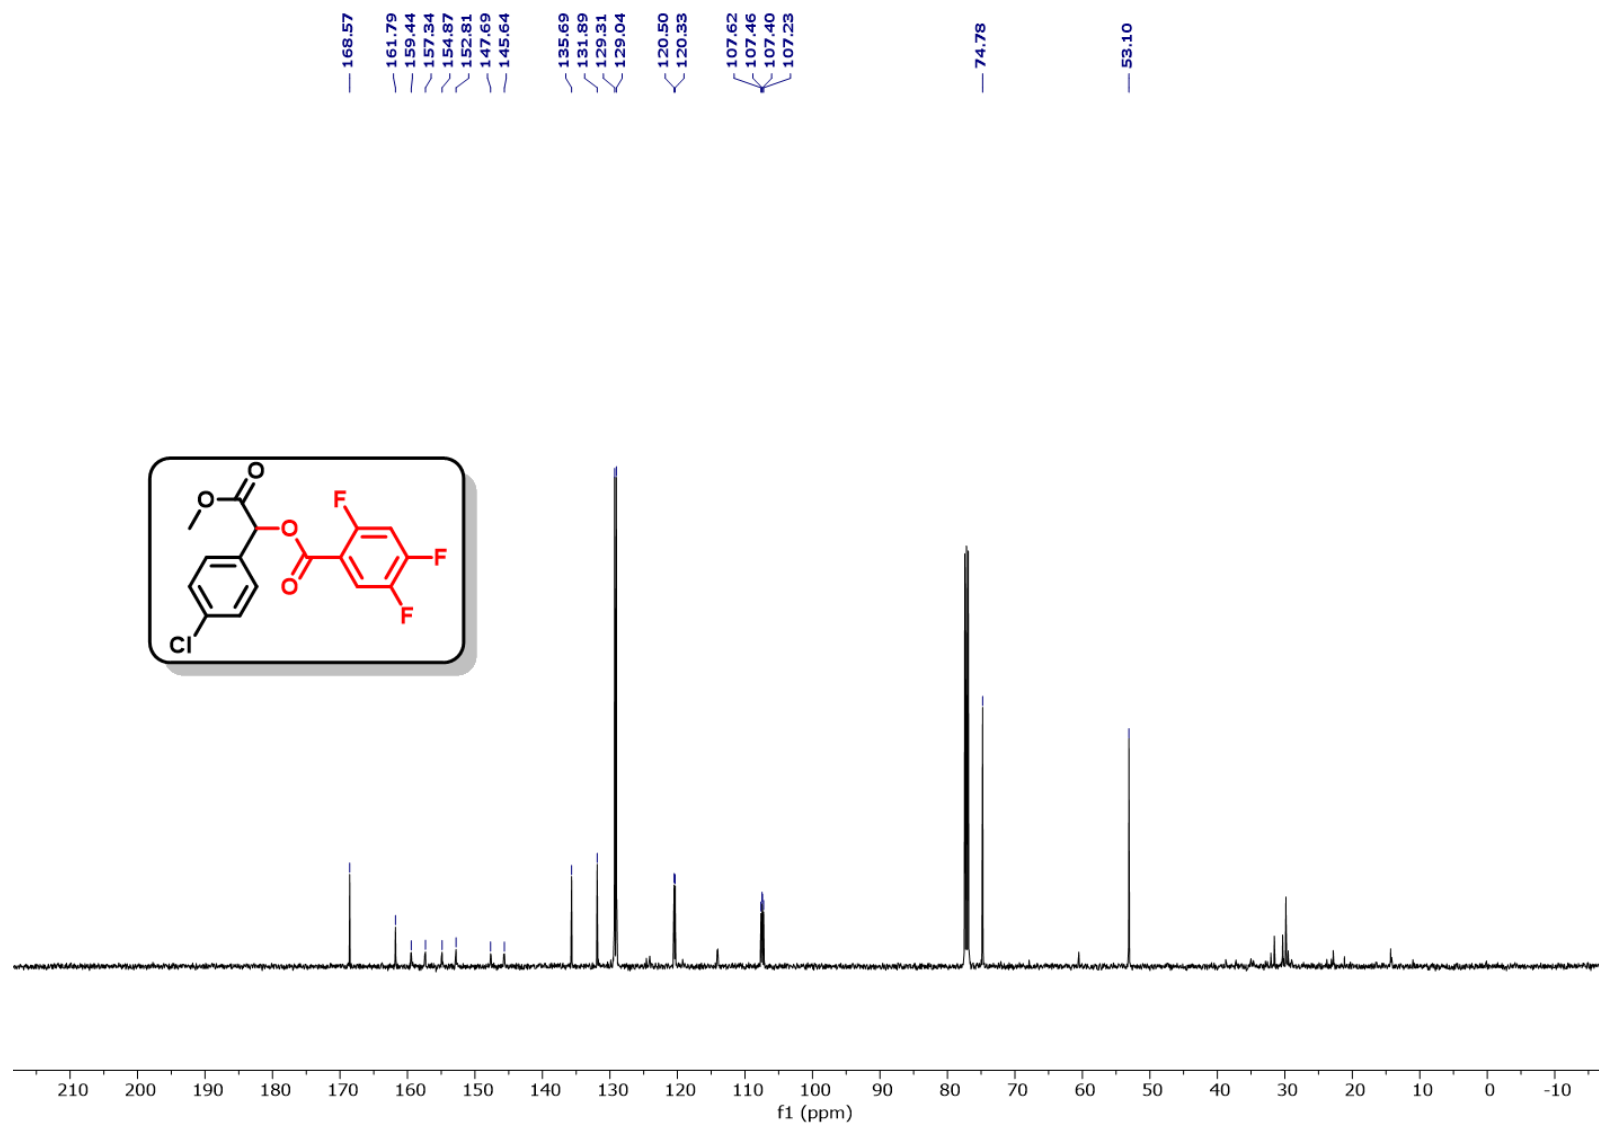

**Fig. S60.** <sup>13</sup>C NMR (126 MHz, CDCl<sub>3</sub>) spectra of 1-(4-chlorophenyl)-2-methoxy-2-oxoethyl 2,4,5-trifluorobenzoate (**4b**).

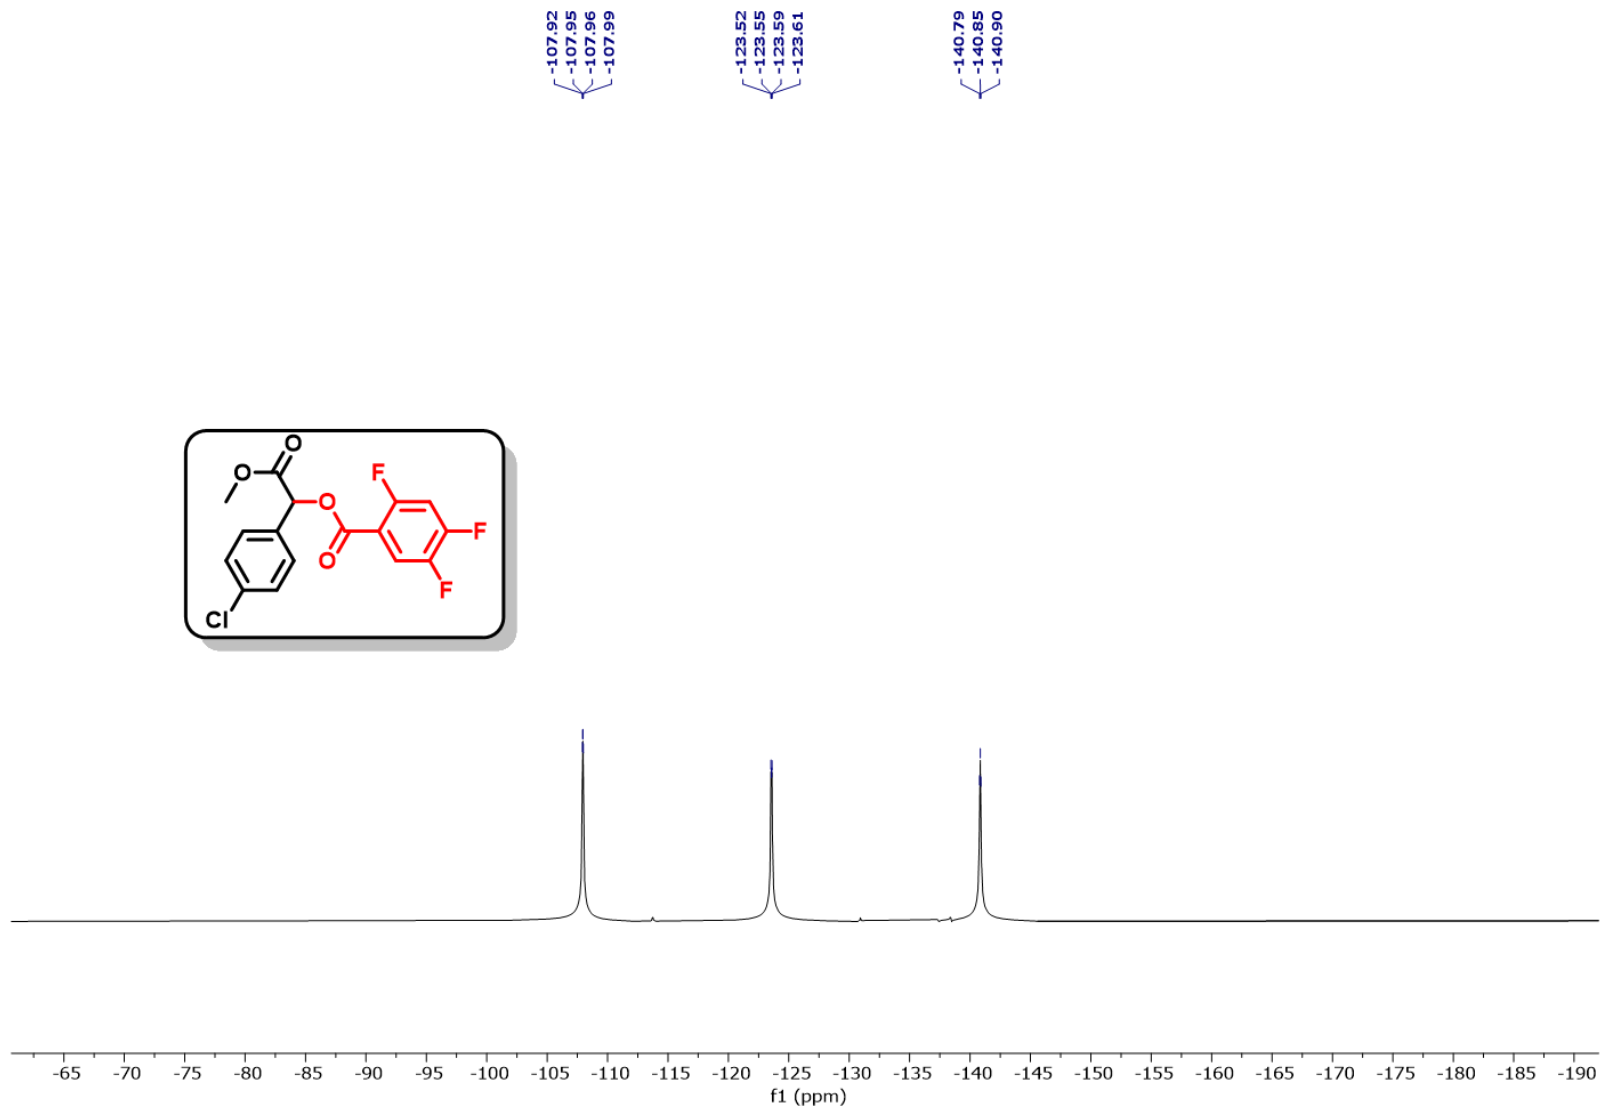

**Fig. S61.**  $^{19}\text{F}$  NMR (376 MHz,  $\text{CDCl}_3$ ) spectra of 1-(4-chlorophenyl)-2-methoxy-2-oxoethyl 2,4,5-trifluorobenzoate (**4b**).

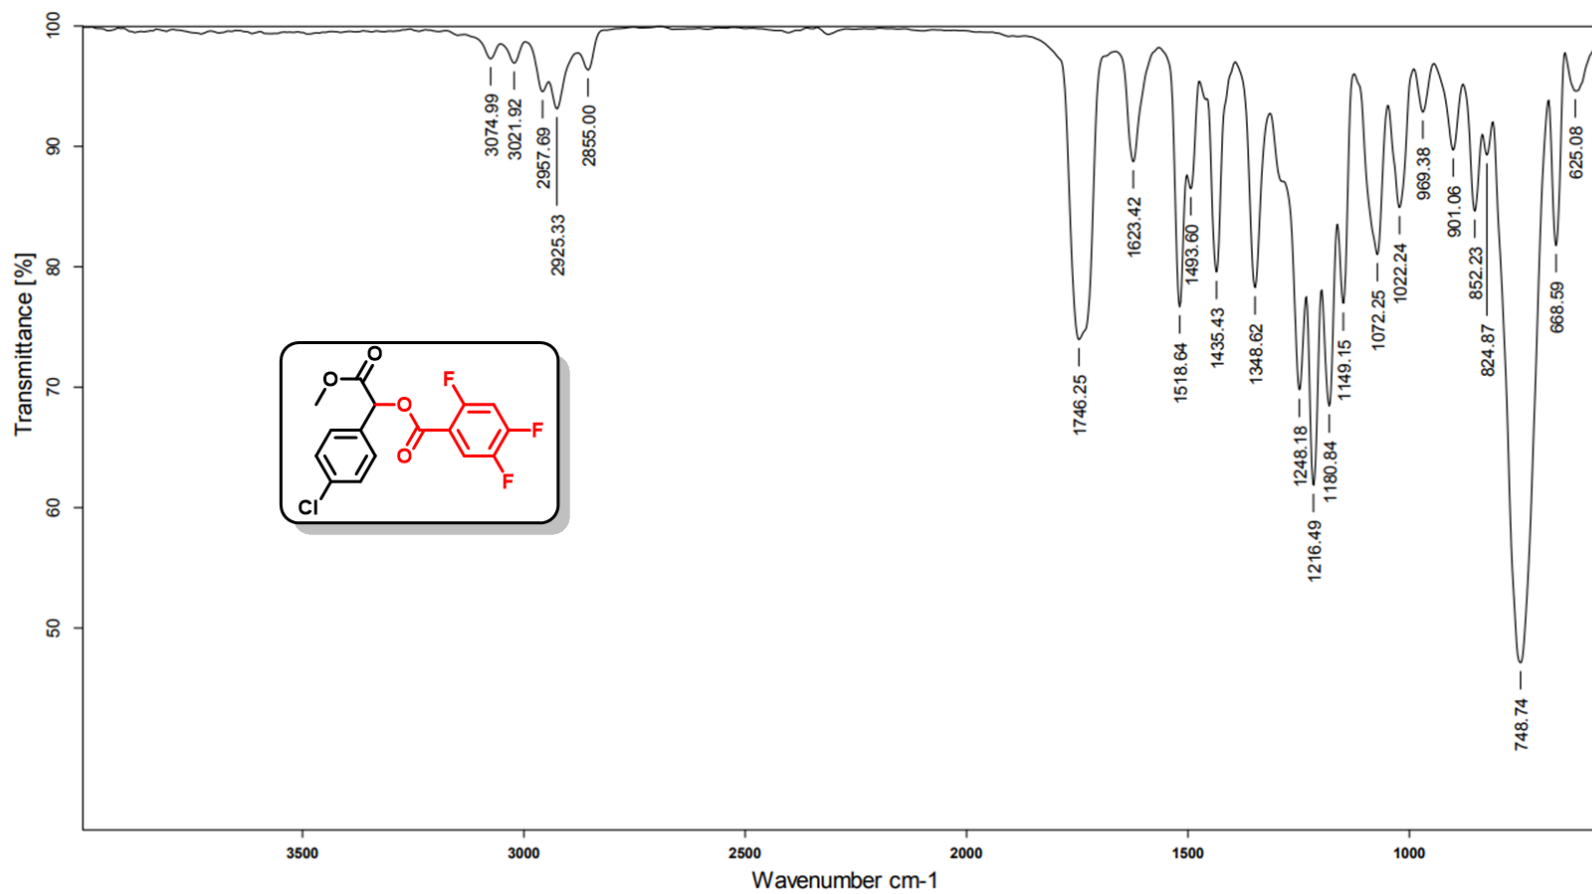

**Fig. S62.** IR spectra of spectra of 1-(4-chlorophenyl)-2-methoxy-2-oxoethyl 2,4,5-trifluorobenzoate (**4b**).

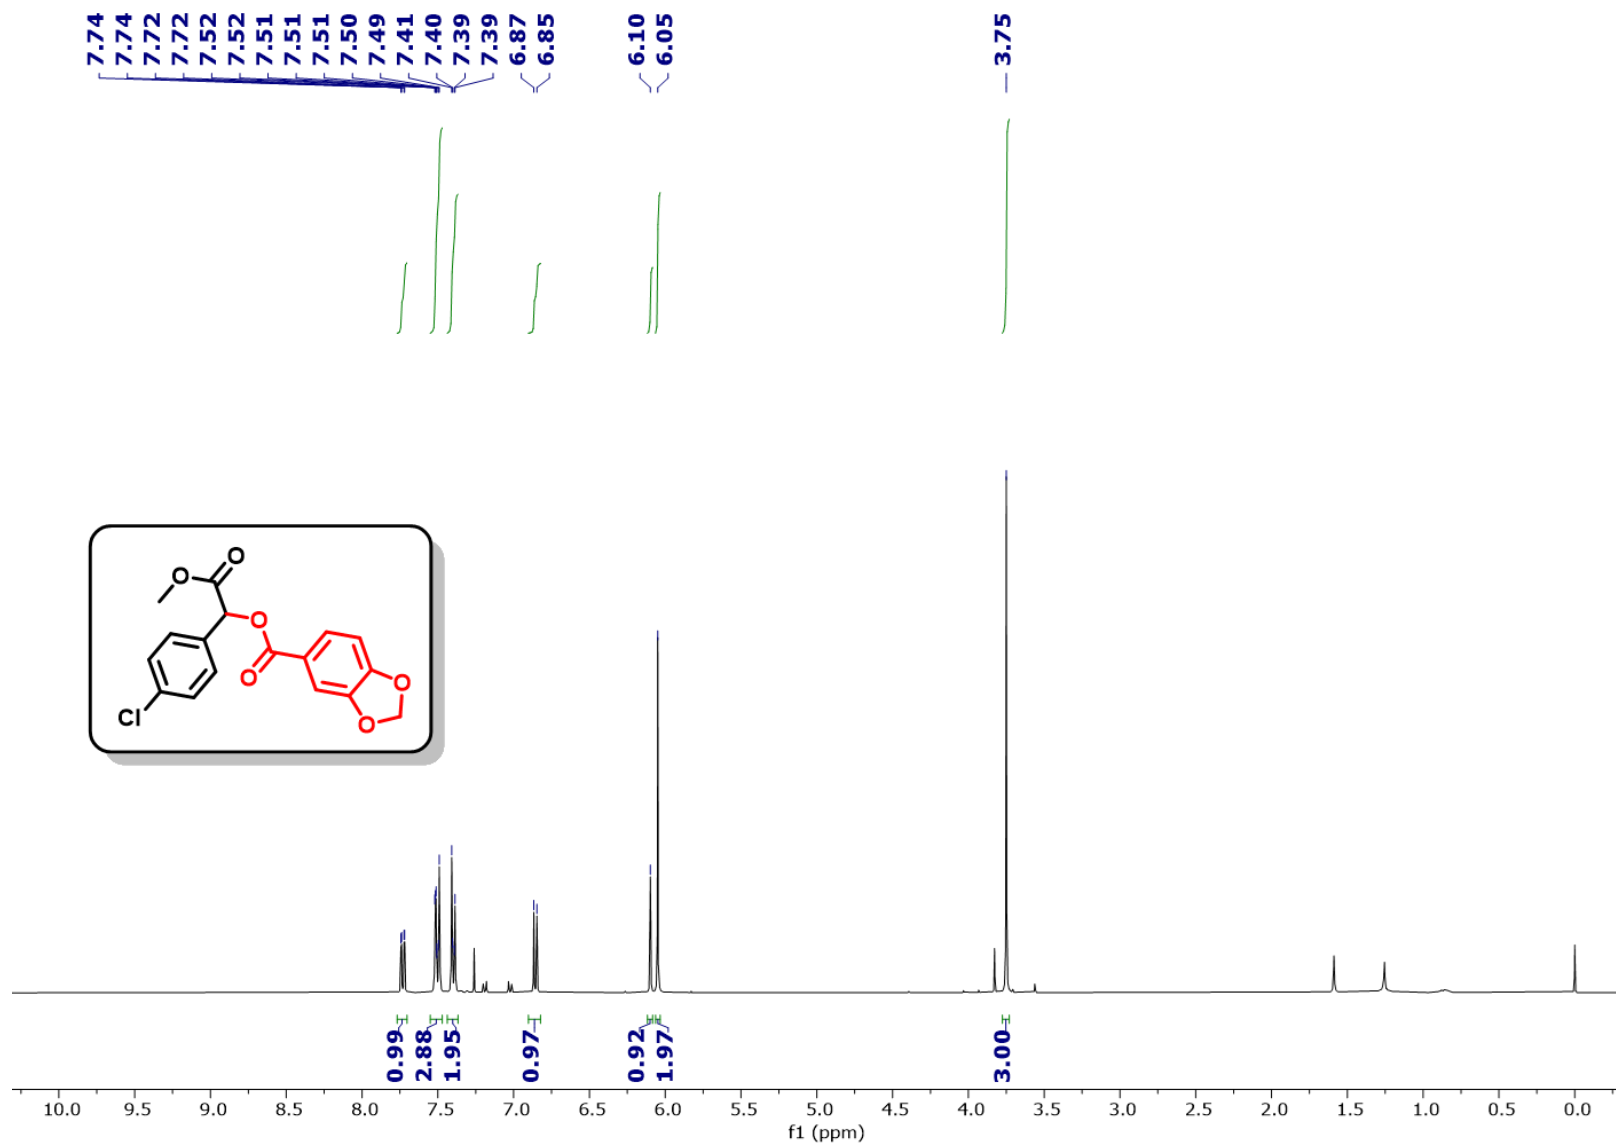

**Fig. S63.** <sup>1</sup>H NMR (400 MHz, CDCl<sub>3</sub>) spectra of 1-(4-chlorophenyl)-2-methoxy-2-oxoethyl benzo[d][1,3]dioxole-5-carboxylate (**4c**).



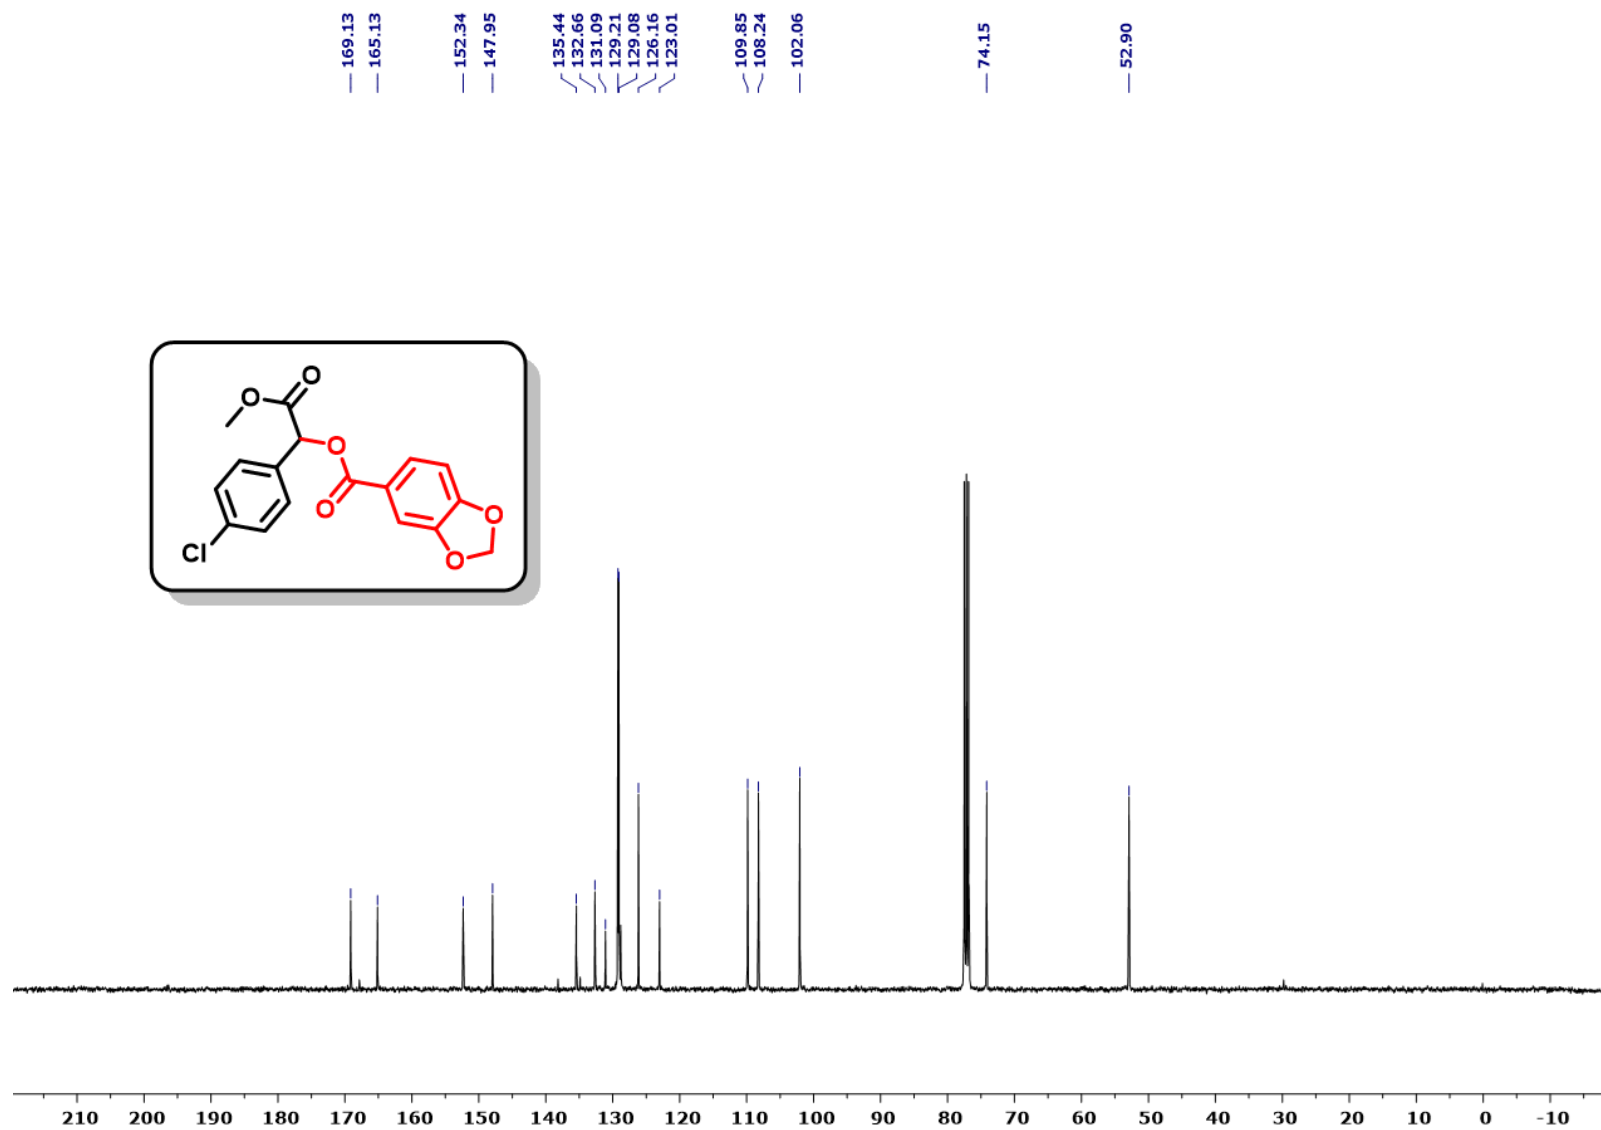

**Fig. S64.** <sup>13</sup>C NMR (101 MHz, CDCl<sub>3</sub>) spectra of 1-(4-chlorophenyl)-2-methoxy-2-oxoethyl benzo[d][1,3]dioxole-5-carboxylate (**4c**).

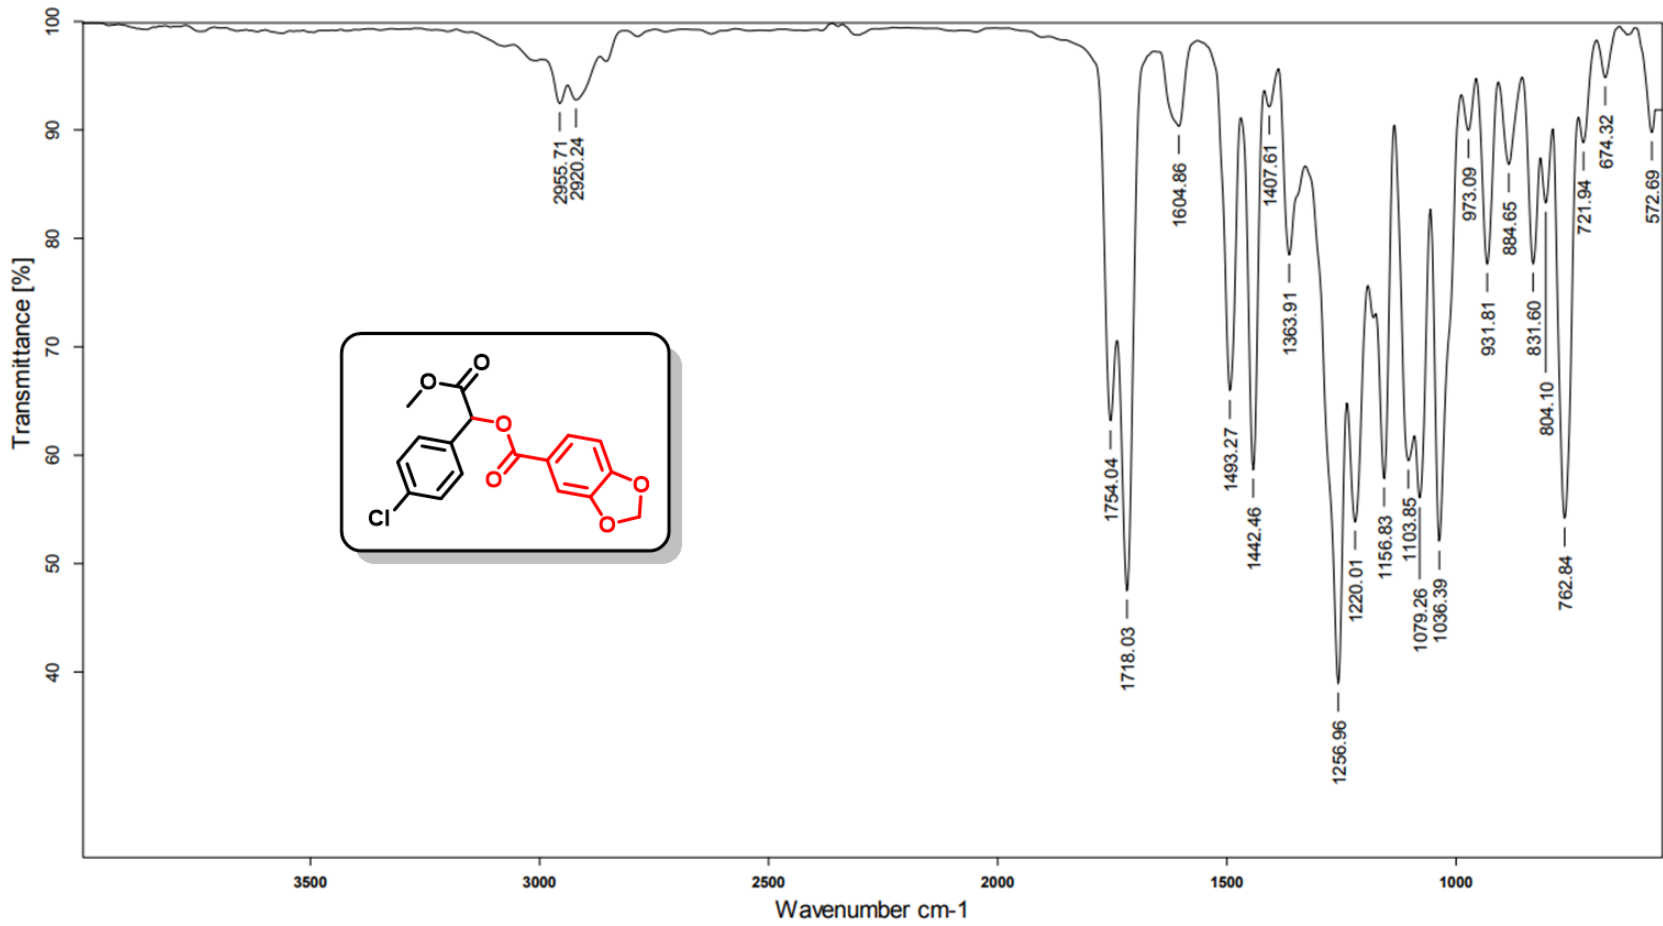

**Fig. S65.** IR spectra of spectra of 1-(4-chlorophenyl)-2-methoxy-2-oxoethyl benzo[d][1,3]dioxole-5-carboxylate (**4c**).

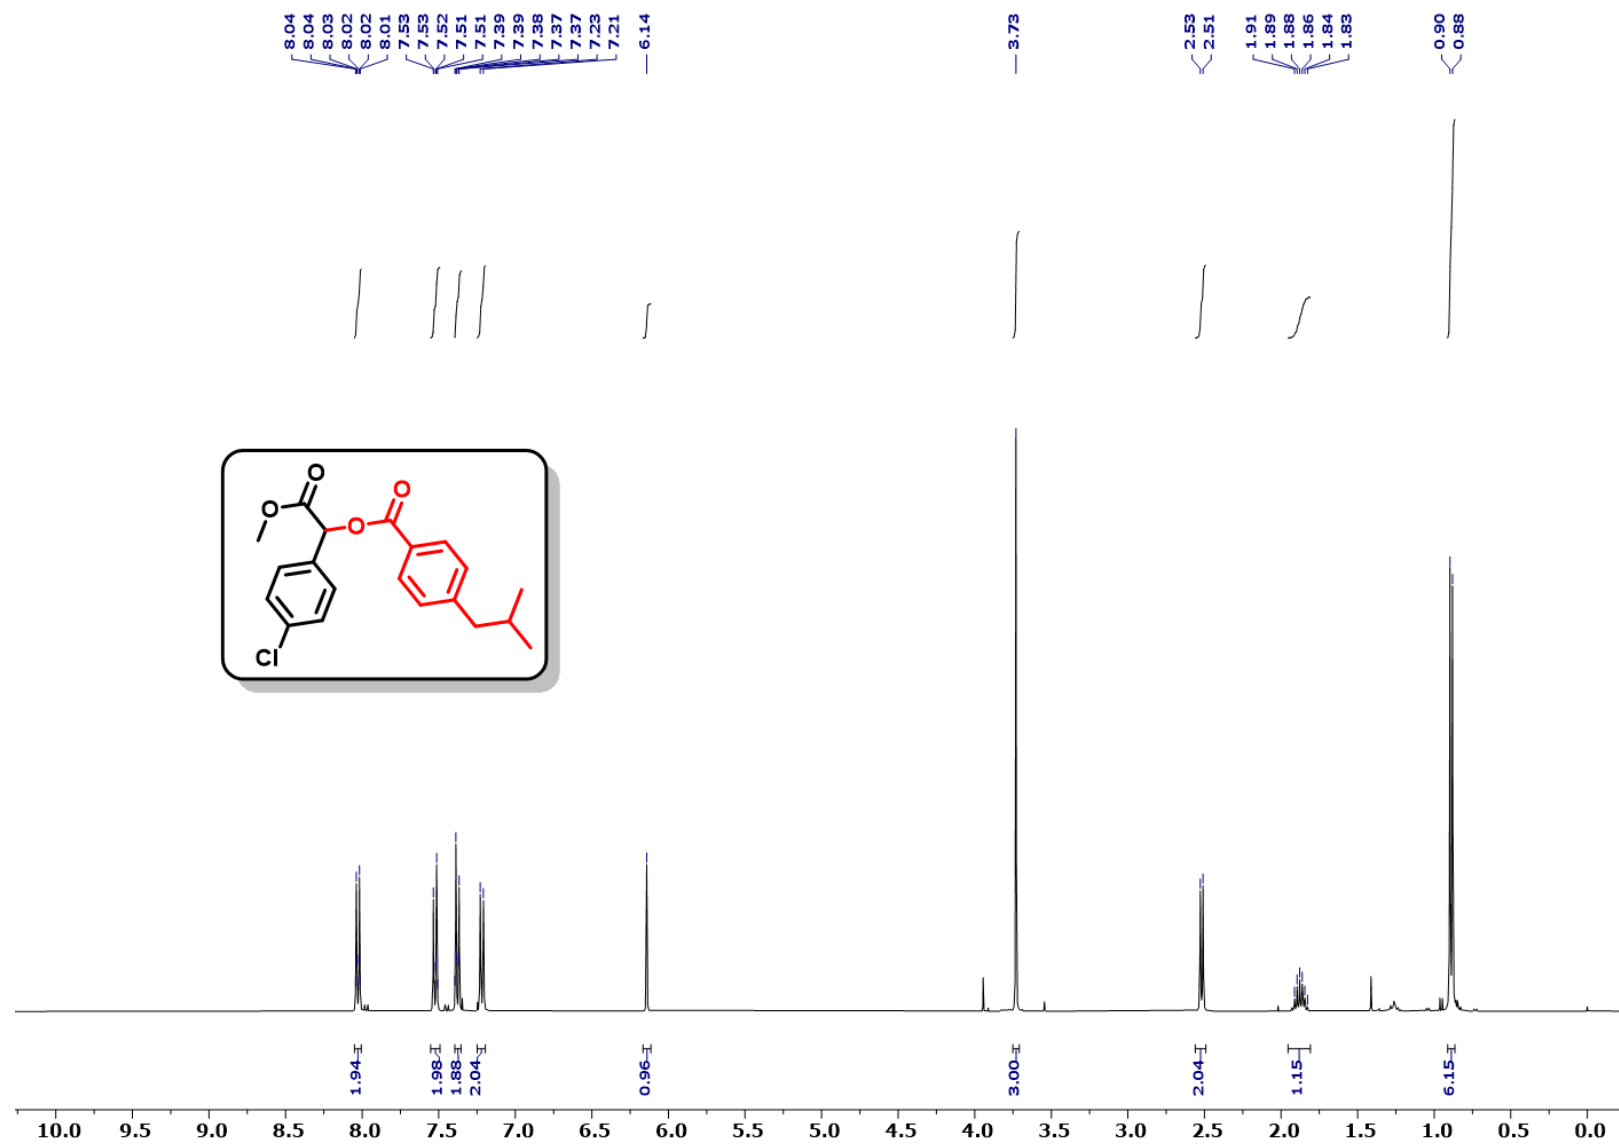

**Fig. S66.** <sup>1</sup>H NMR (400 MHz, CDCl<sub>3</sub>) spectra of 1-(4-chlorophenyl)-2-methoxy-2-oxoethyl 4-isobutylbenzoate (**4d**).

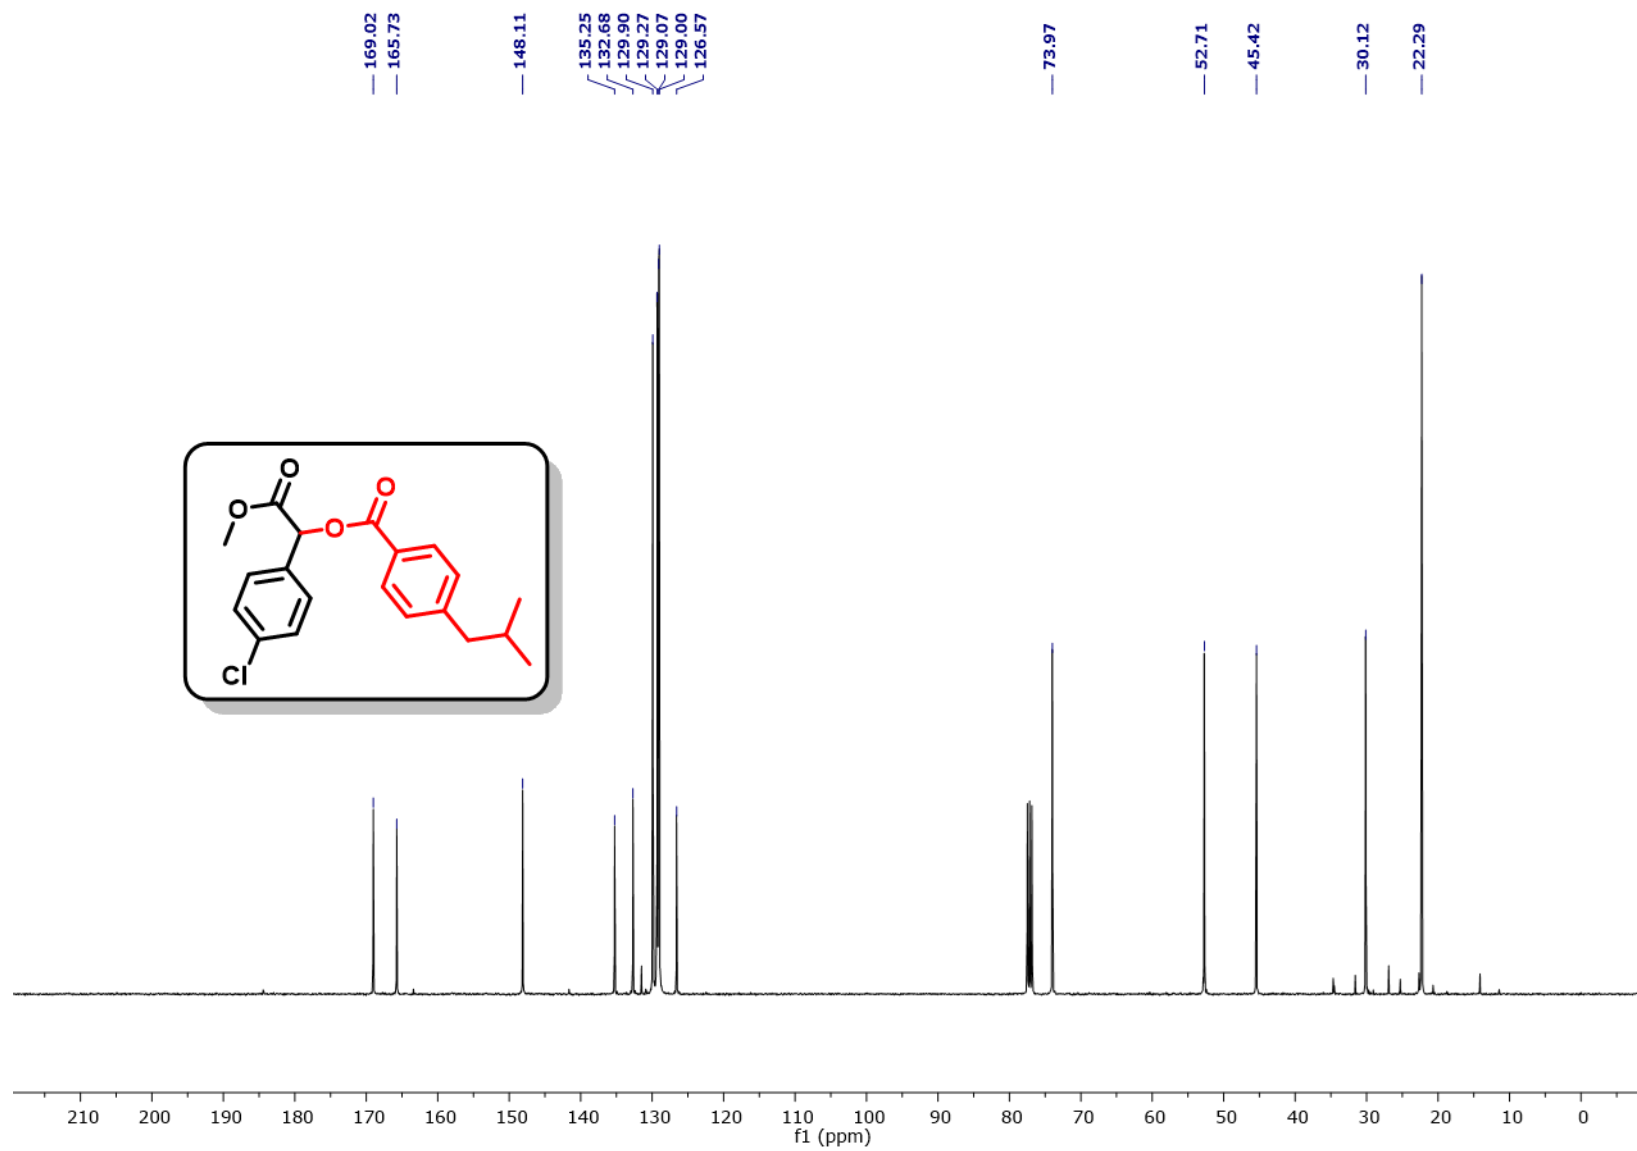

**Fig. S67.** <sup>13</sup>C NMR (101 MHz, CDCl<sub>3</sub>) spectra of 1-(4-chlorophenyl)-2-methoxy-2-oxoethyl 4-isobutylbenzoate (**4d**).

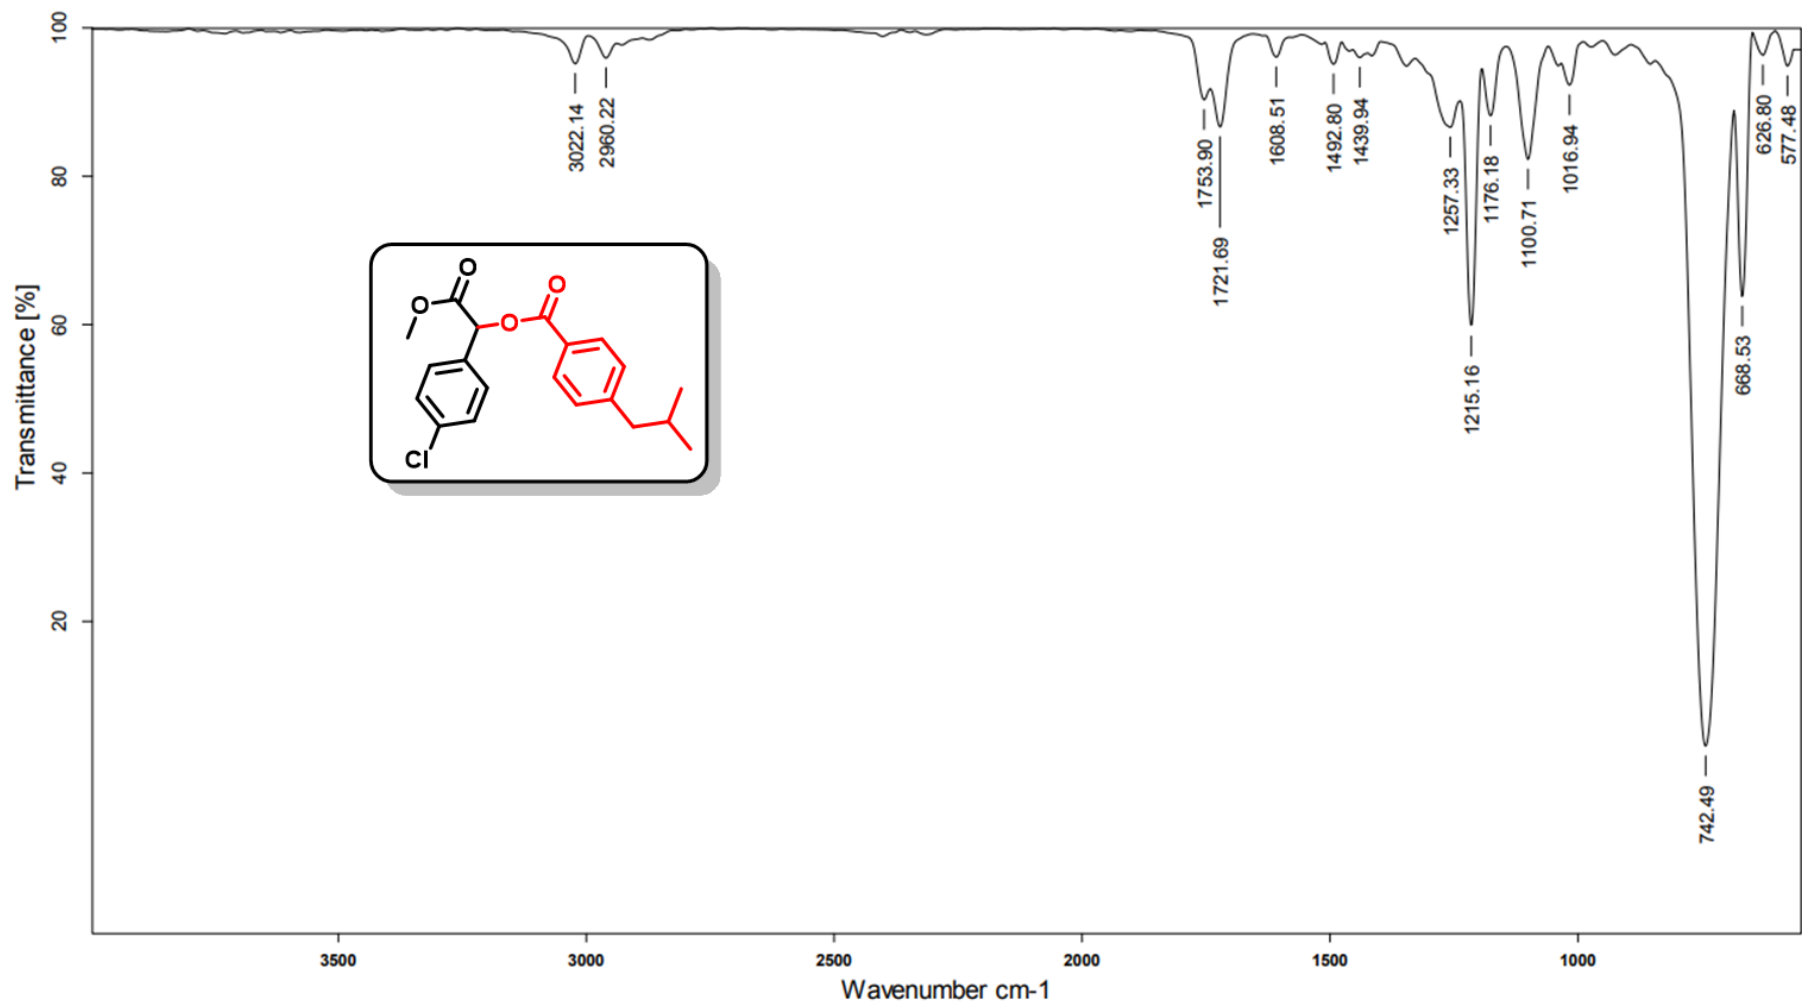

**Fig. S68.** IR spectra of spectra of 1-(4-chlorophenyl)-2-methoxy-2-oxoethyl 4-isobutylbenzoate (**4d**).

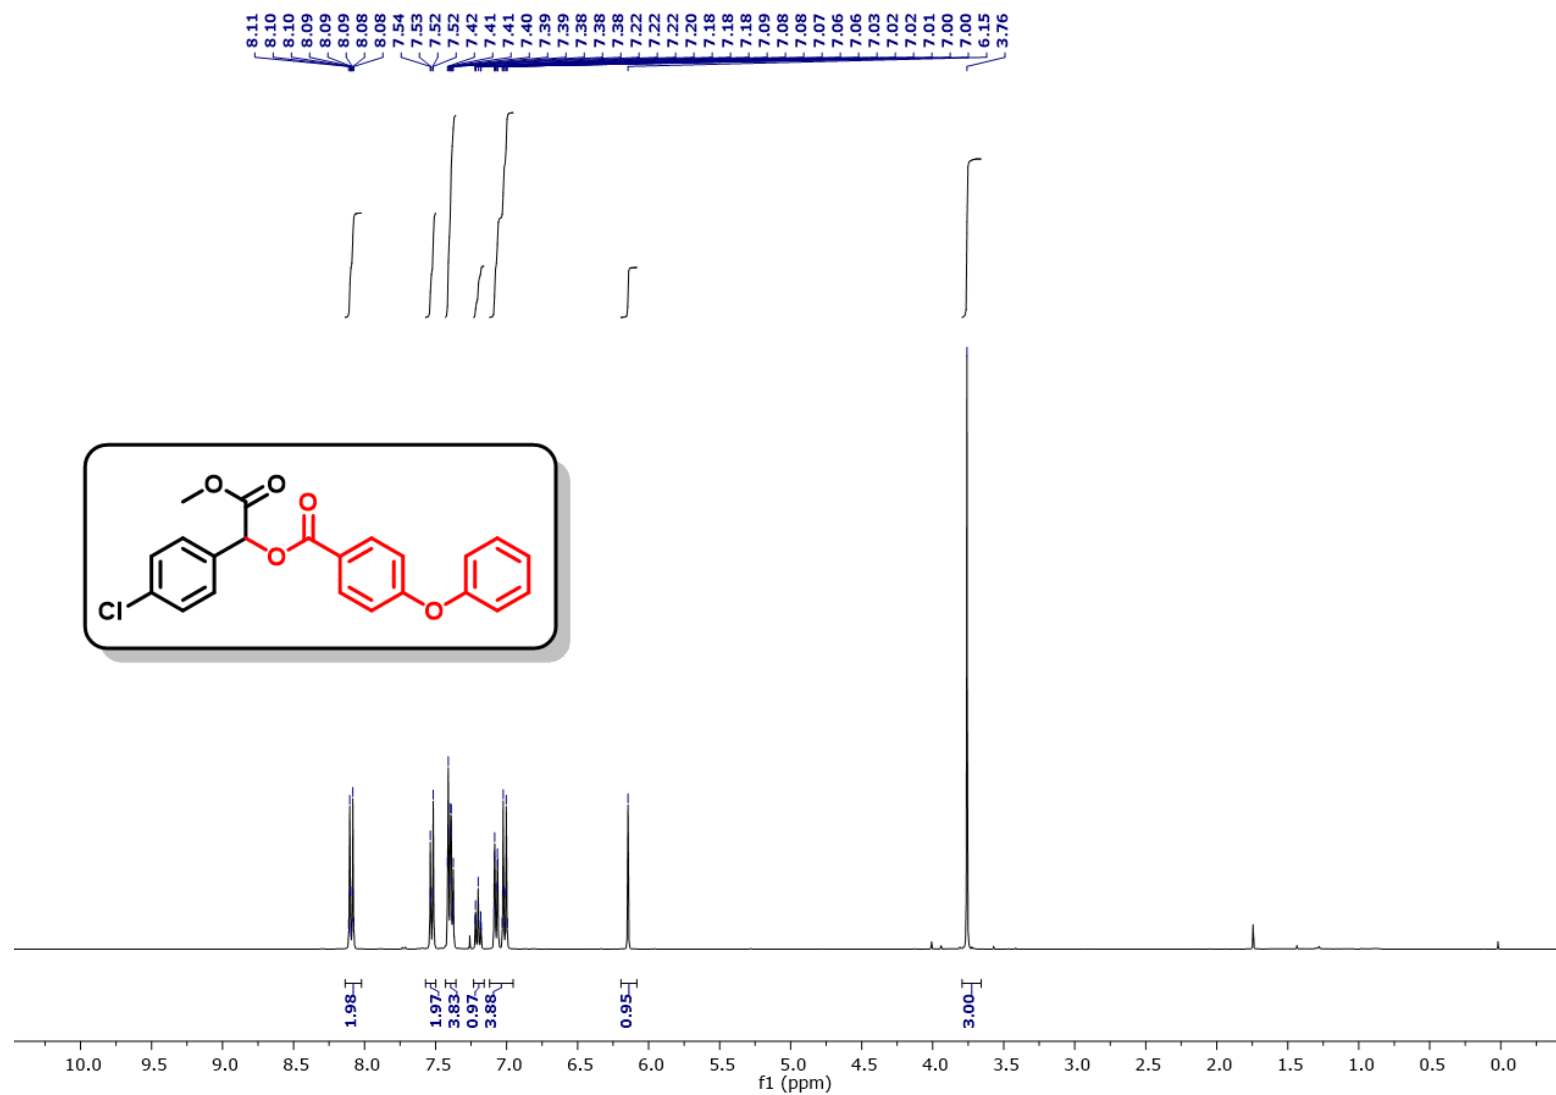

**Fig. S69.** <sup>1</sup>H NMR (400 MHz, CDCl<sub>3</sub>) spectra of 1-(4-chlorophenyl)-2-methoxy-2-oxoethyl 4-phenoxybenzoate (**4e**).

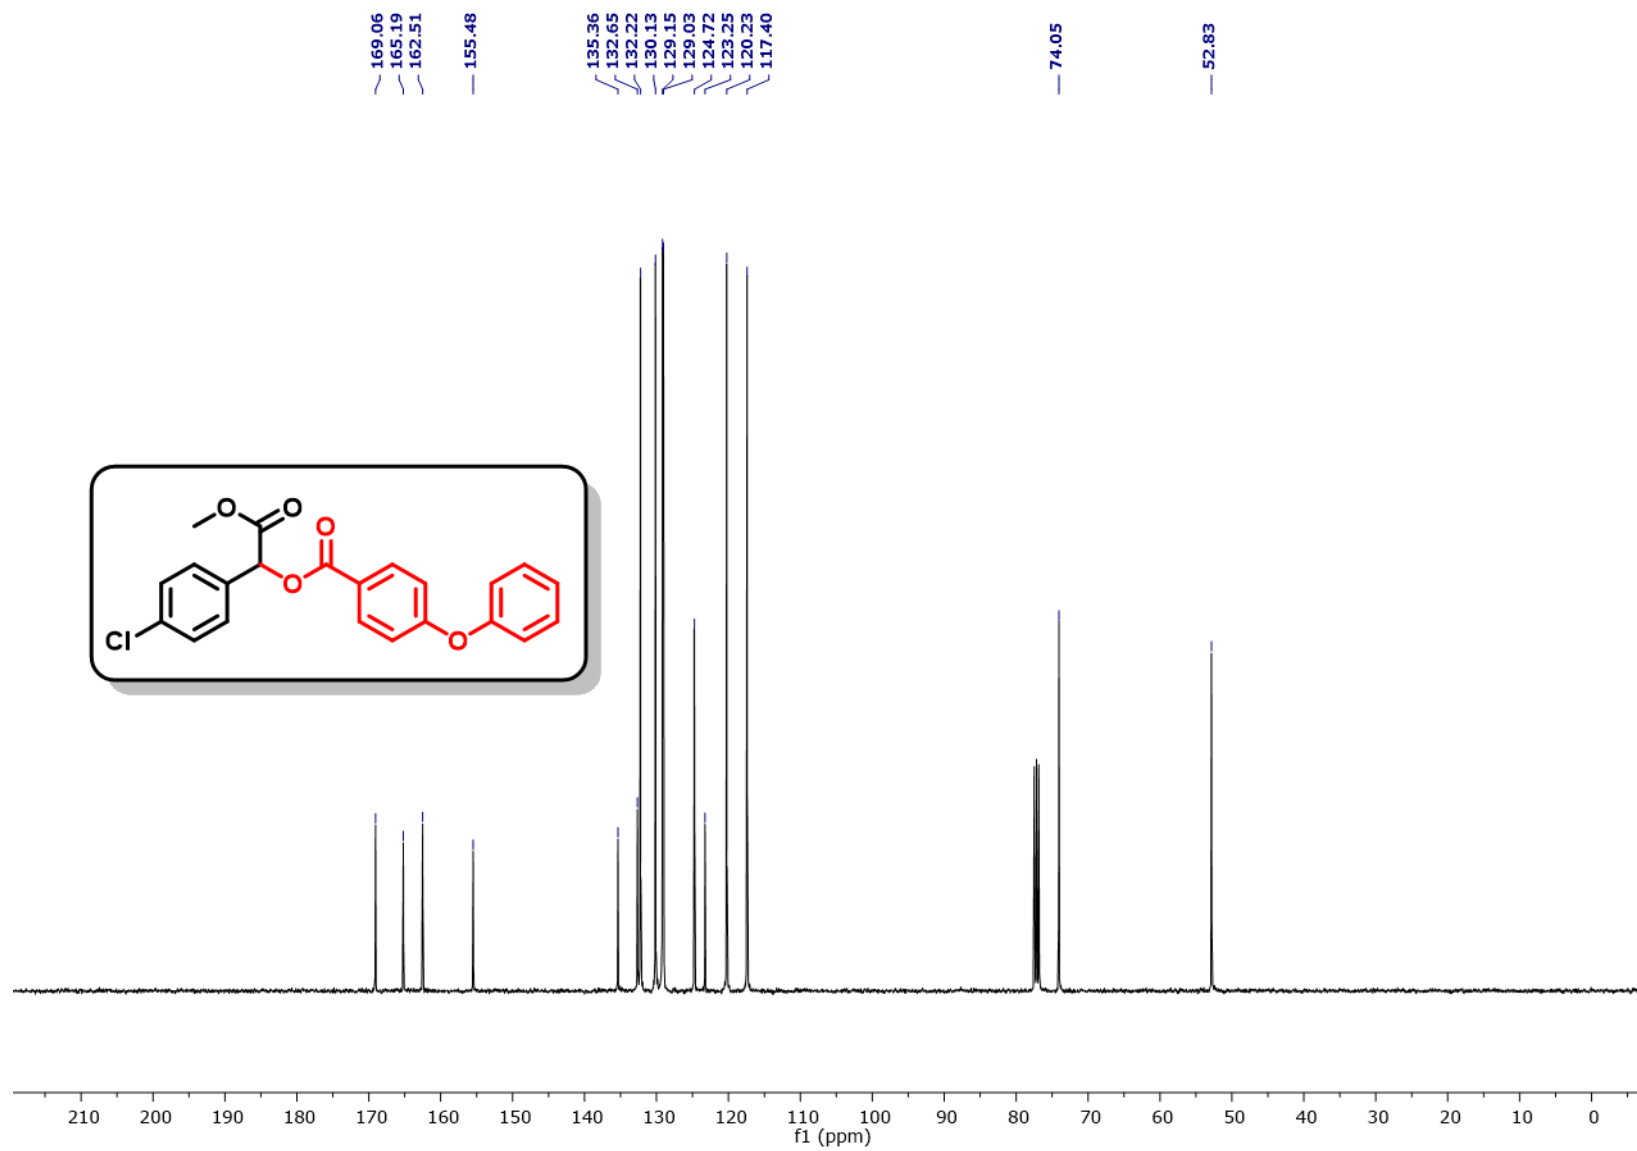

**Fig. S70.** <sup>13</sup>C NMR (101 MHz, CDCl<sub>3</sub>) spectra of 1-(4-chlorophenyl)-2-methoxy-2-oxoethyl 4-phenoxybenzoate (**4e**).

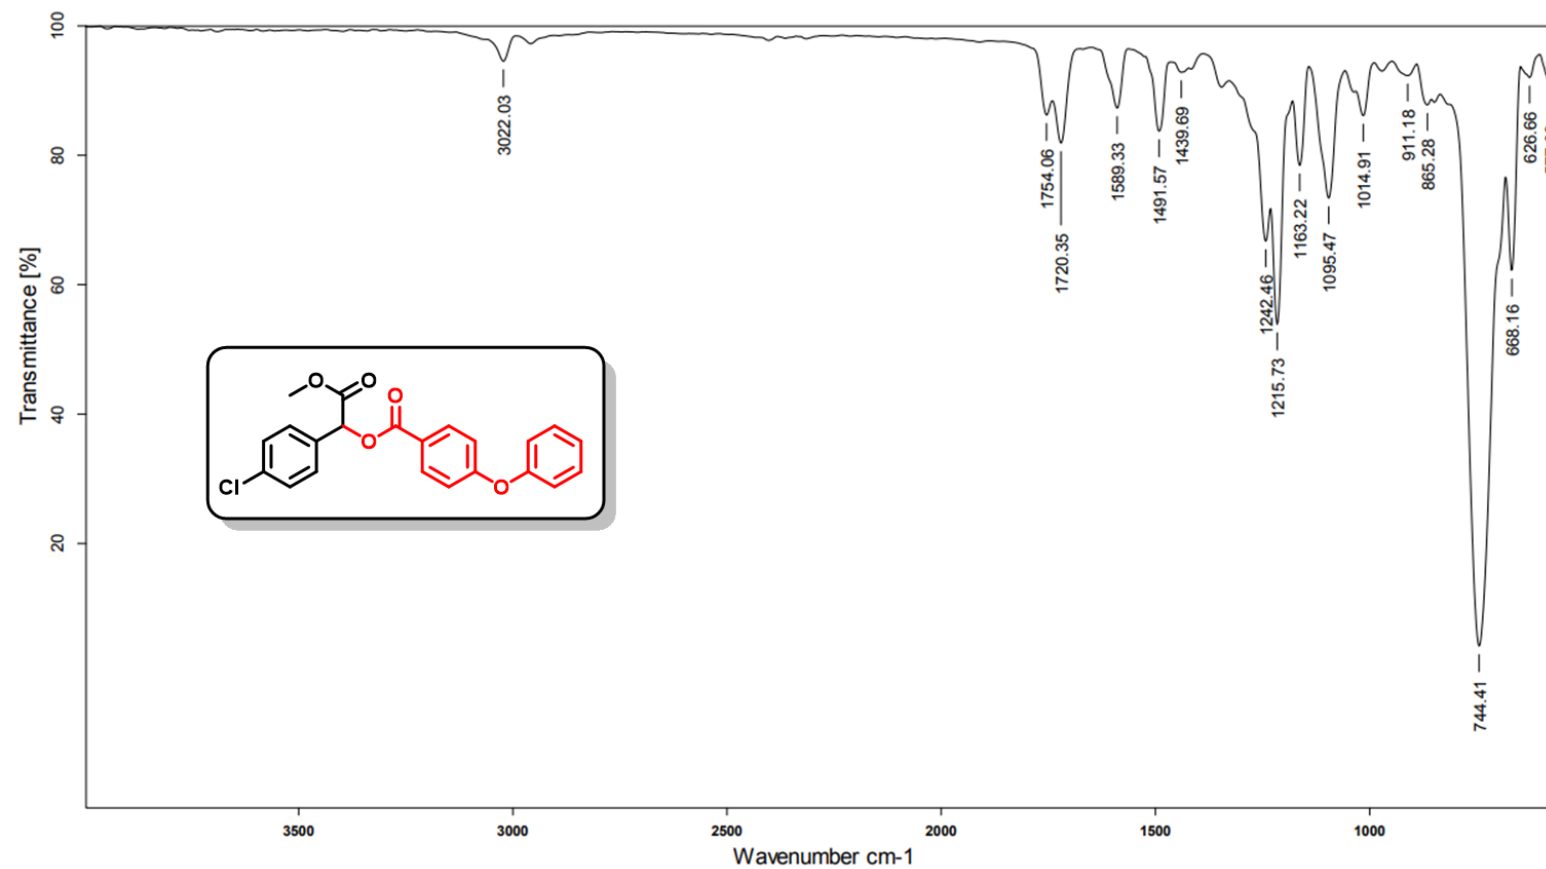

**Fig. S71.** IR spectra of spectra of 1-(4-chlorophenyl)-2-methoxy-2-oxoethyl 4-phenoxybenzoate (**4e**).



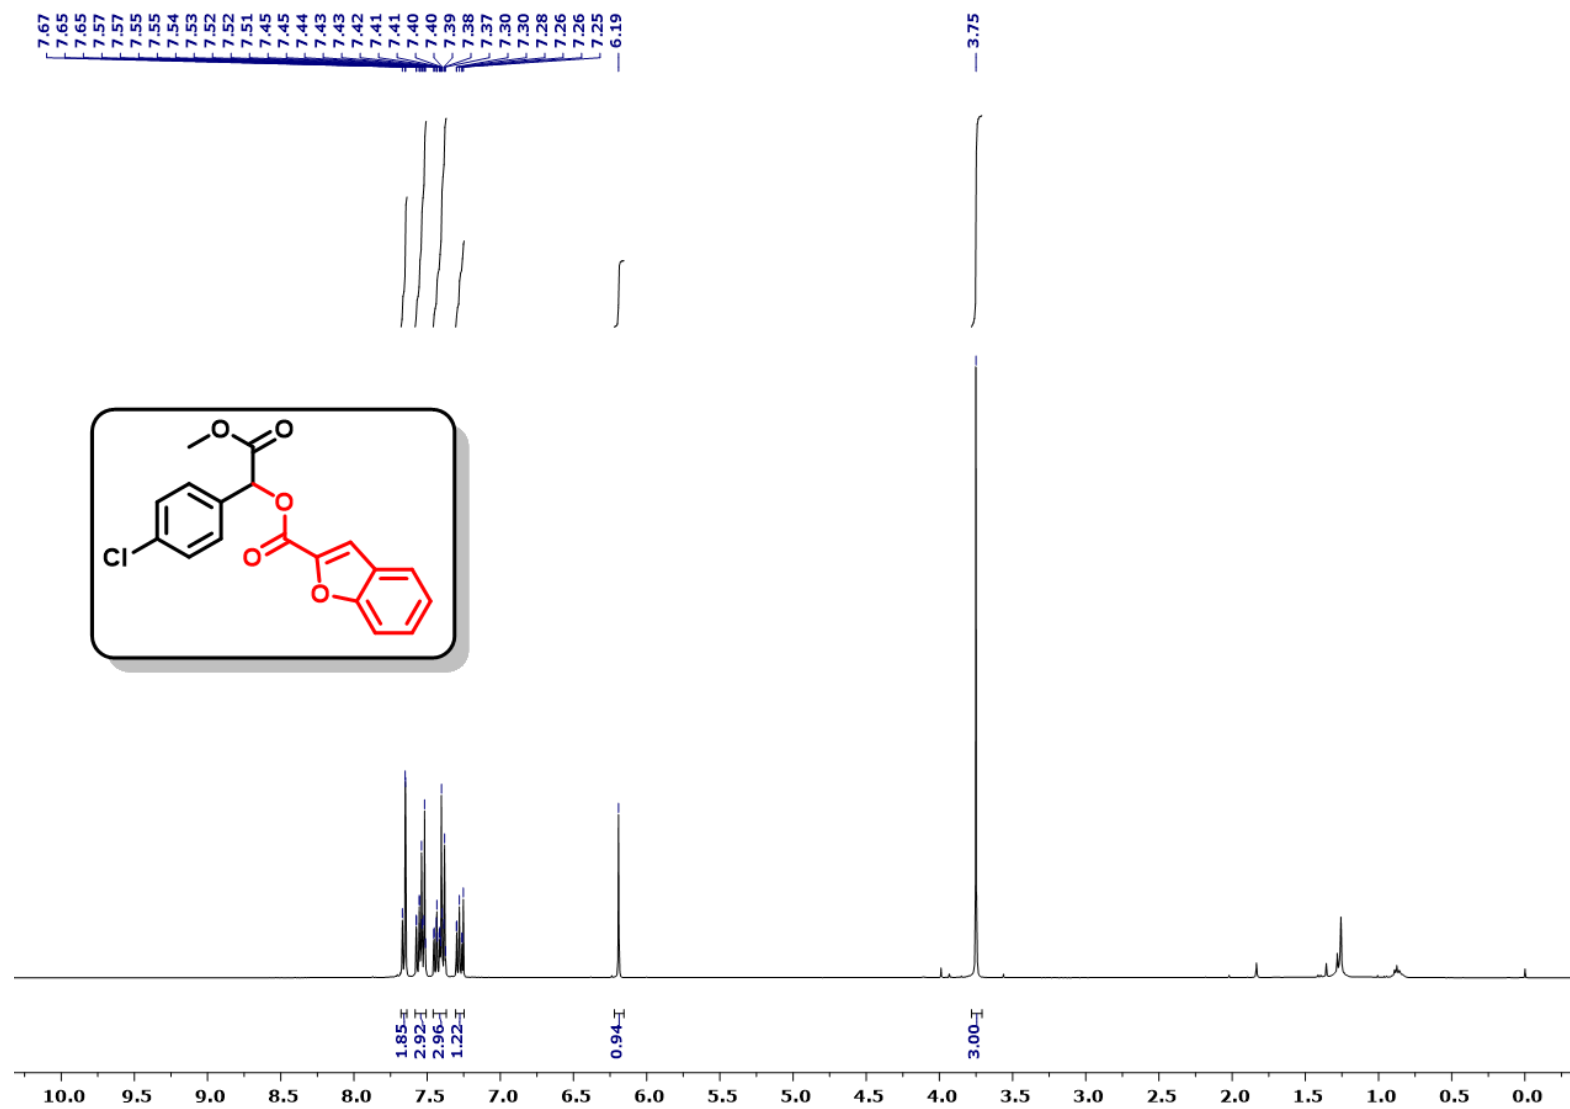

Fig. S72. <sup>1</sup>H NMR (400 MHz, CDCl<sub>3</sub>) spectra of 1-(4-chlorophenyl)-2-methoxy-2-oxoethyl benzofuran-2-carboxylate (4f).

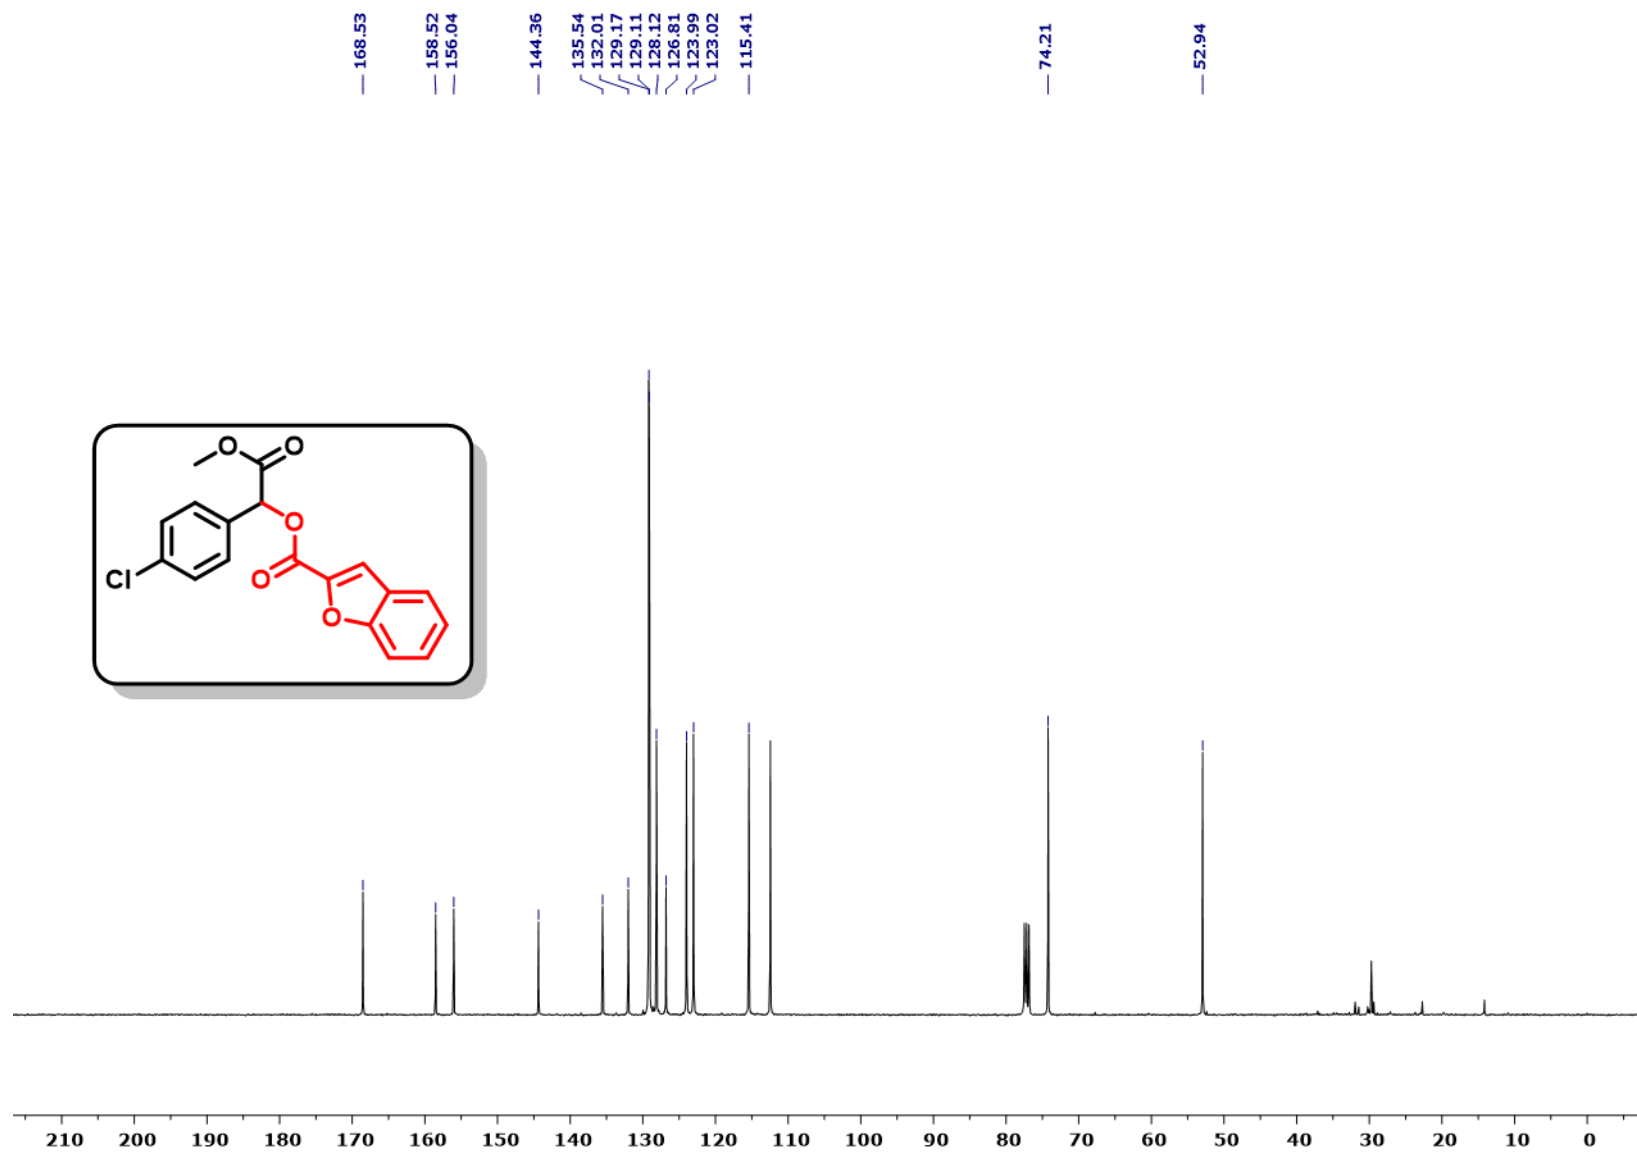

**Fig. S73.** <sup>13</sup>C NMR (101 MHz, CDCl<sub>3</sub>) spectra of 1-(4-chlorophenyl)-2-methoxy-2-oxoethyl benzofuran-2-carboxylate (**4f**).

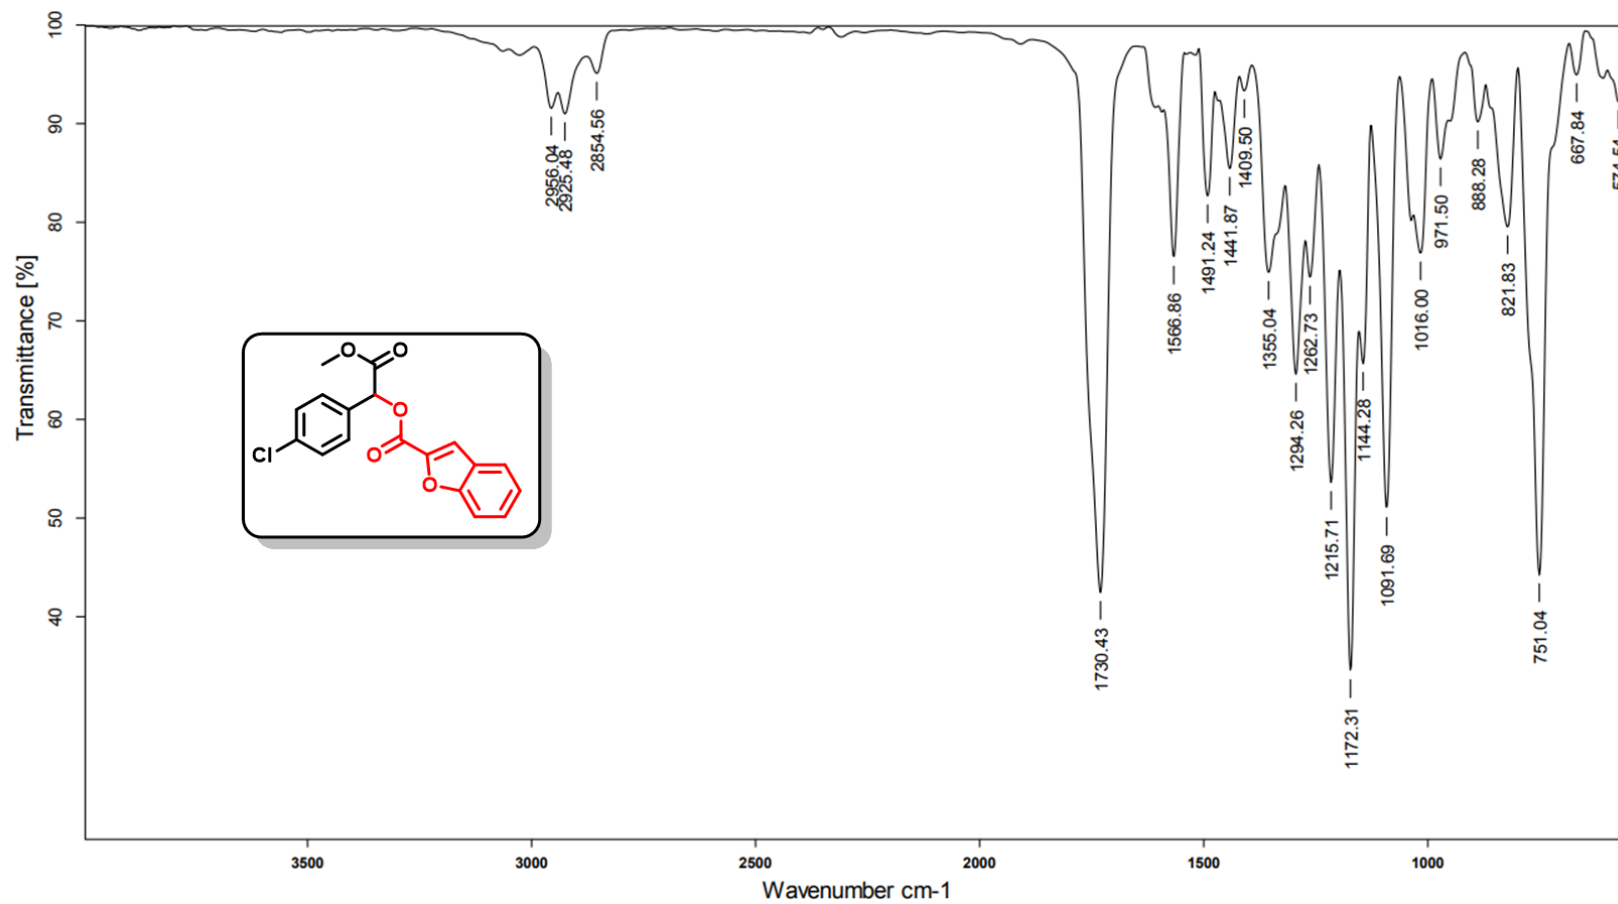

**Fig. S74.** IR spectra of spectra of 1-(4-chlorophenyl)-2-methoxy-2-oxoethyl benzofuran-2-carboxylate (**4f**).

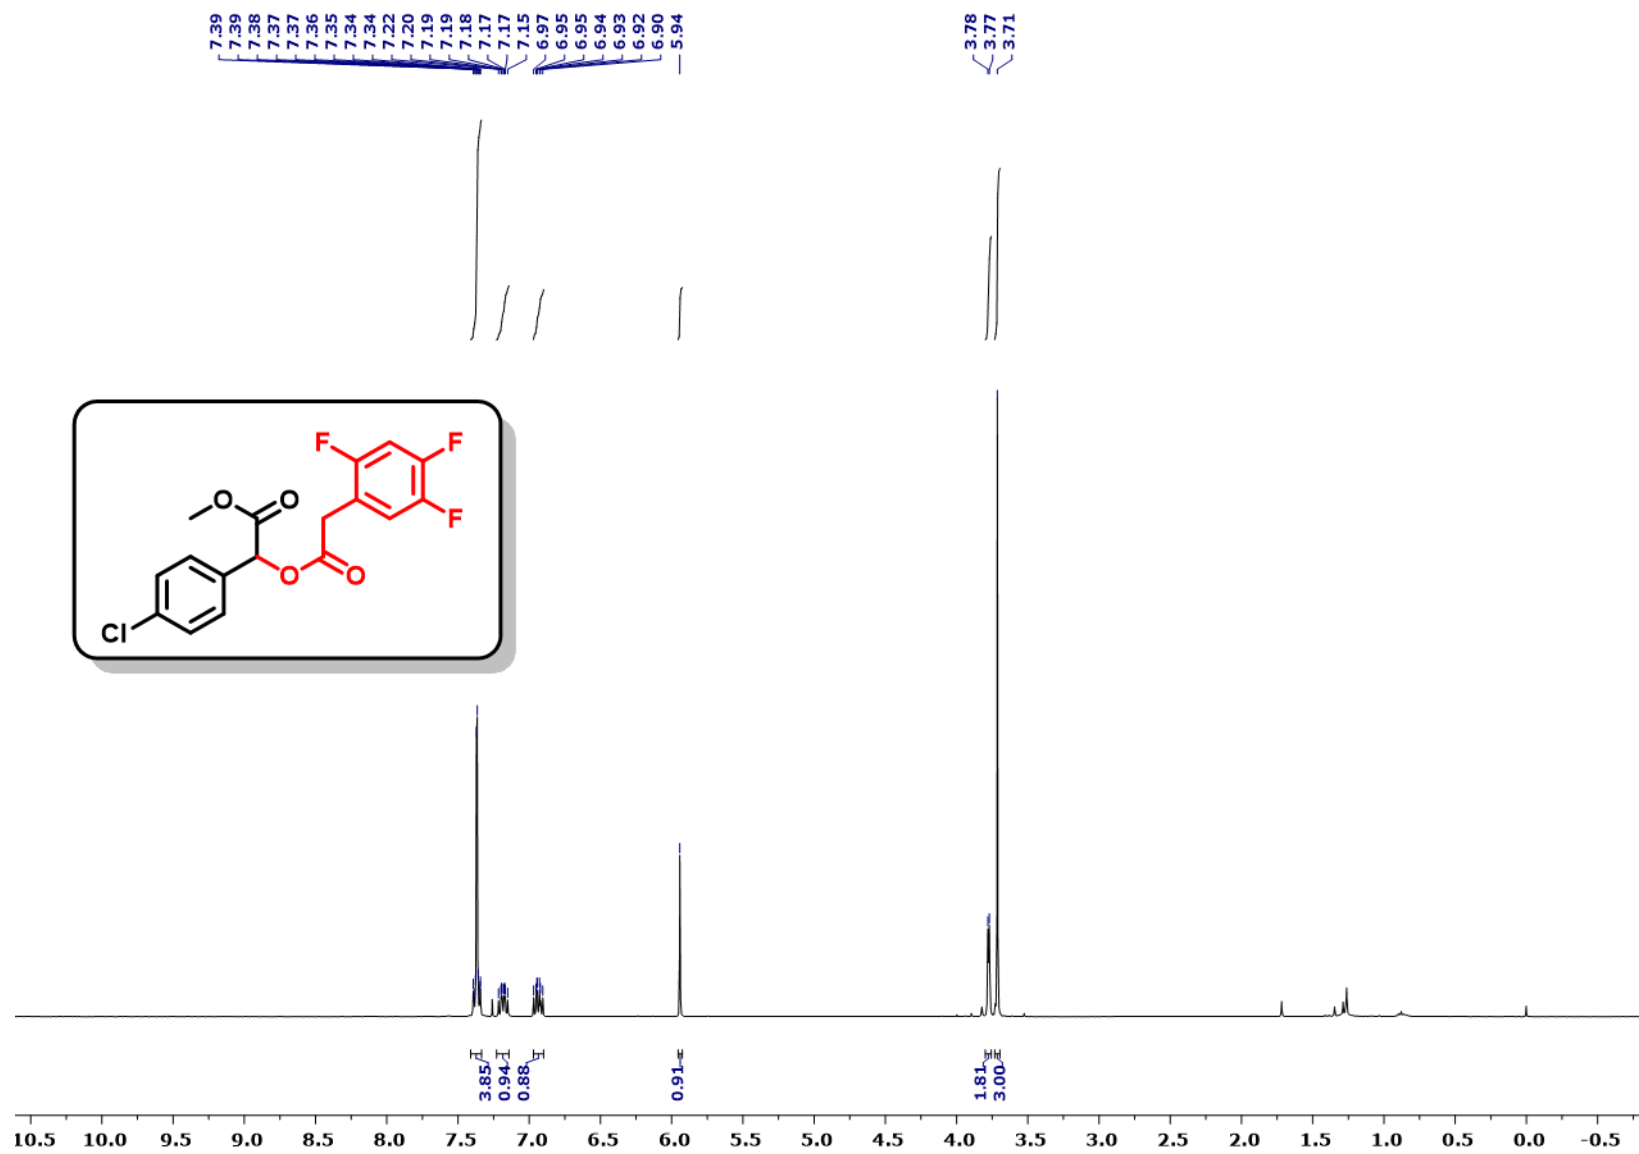

**Fig. S75.** <sup>1</sup>H NMR (400 MHz, CDCl<sub>3</sub>) spectra of methyl 2-(4-chlorophenyl)-2-(2-(2,4,5-trifluorophenyl)acetoxy)acetate (**4g**).

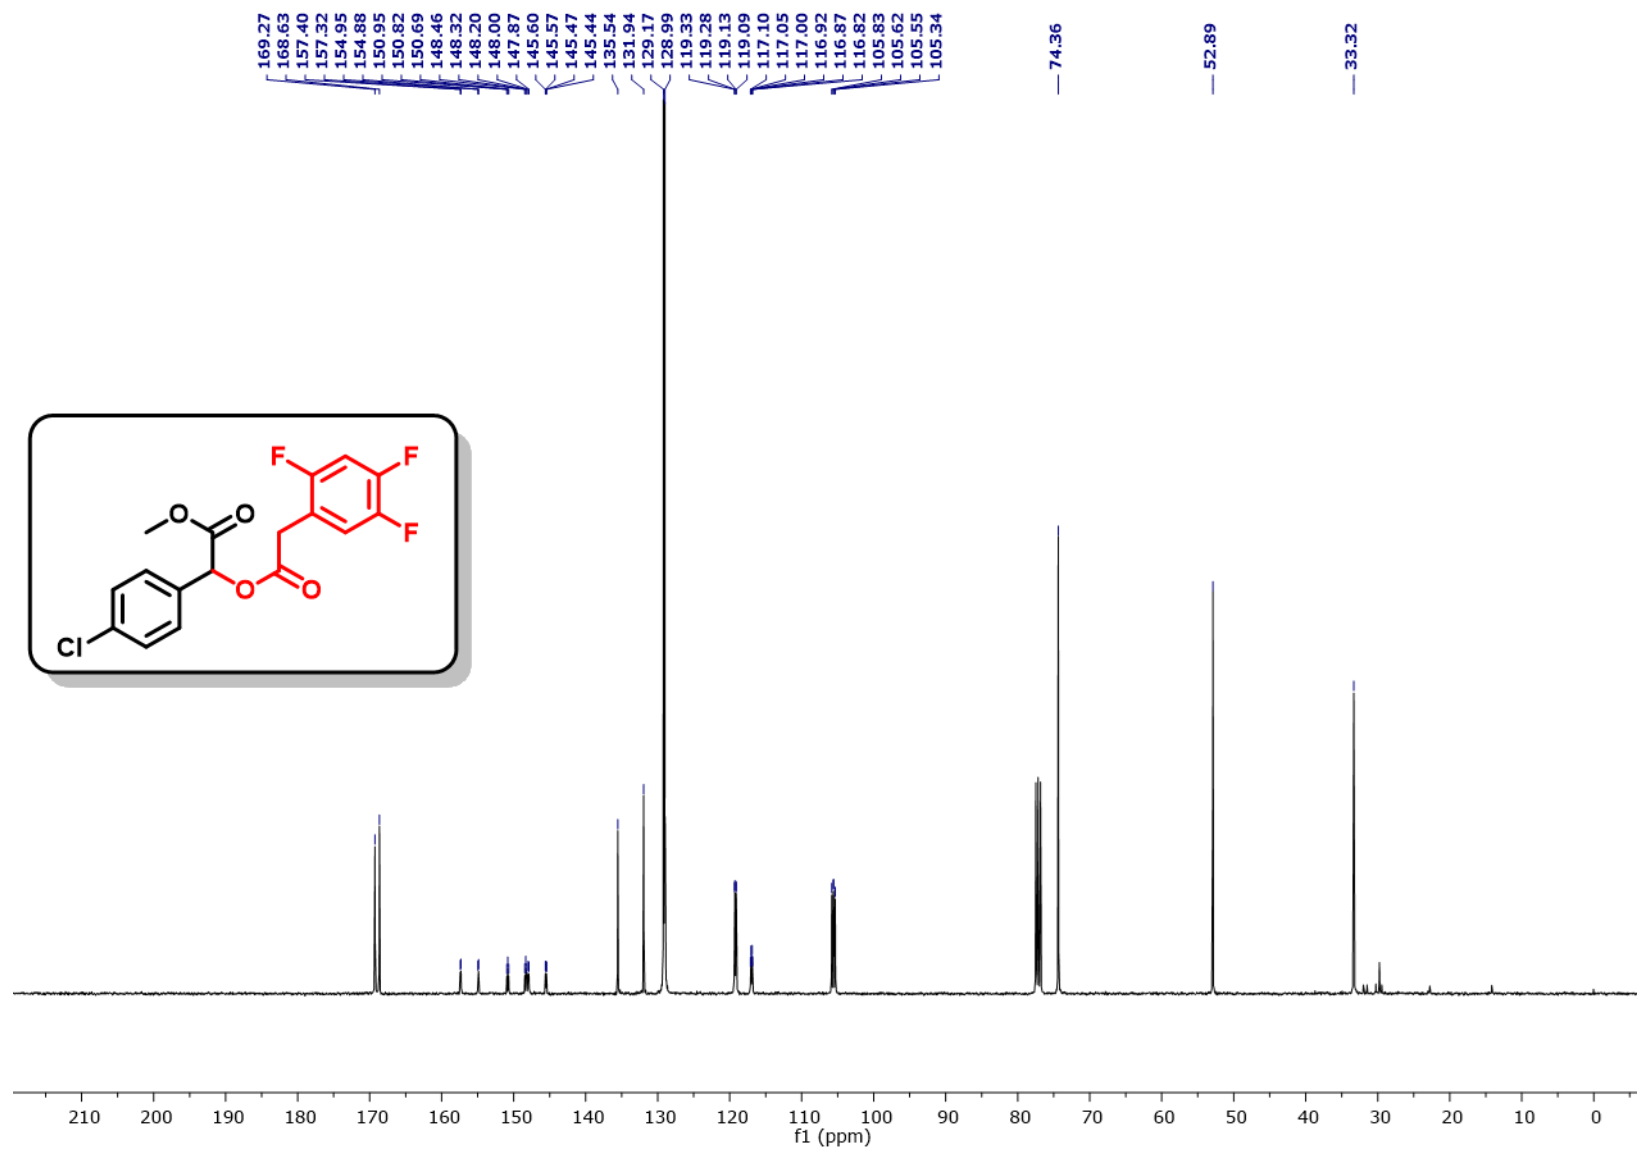

**Fig. S76.**  $^{13}\text{C}$  NMR (101 MHz,  $\text{CDCl}_3$ ) spectra of methyl 2-(4-chlorophenyl)-2-(2-(2,4,5-trifluorophenyl)acetoxy)acetate (**4g**).

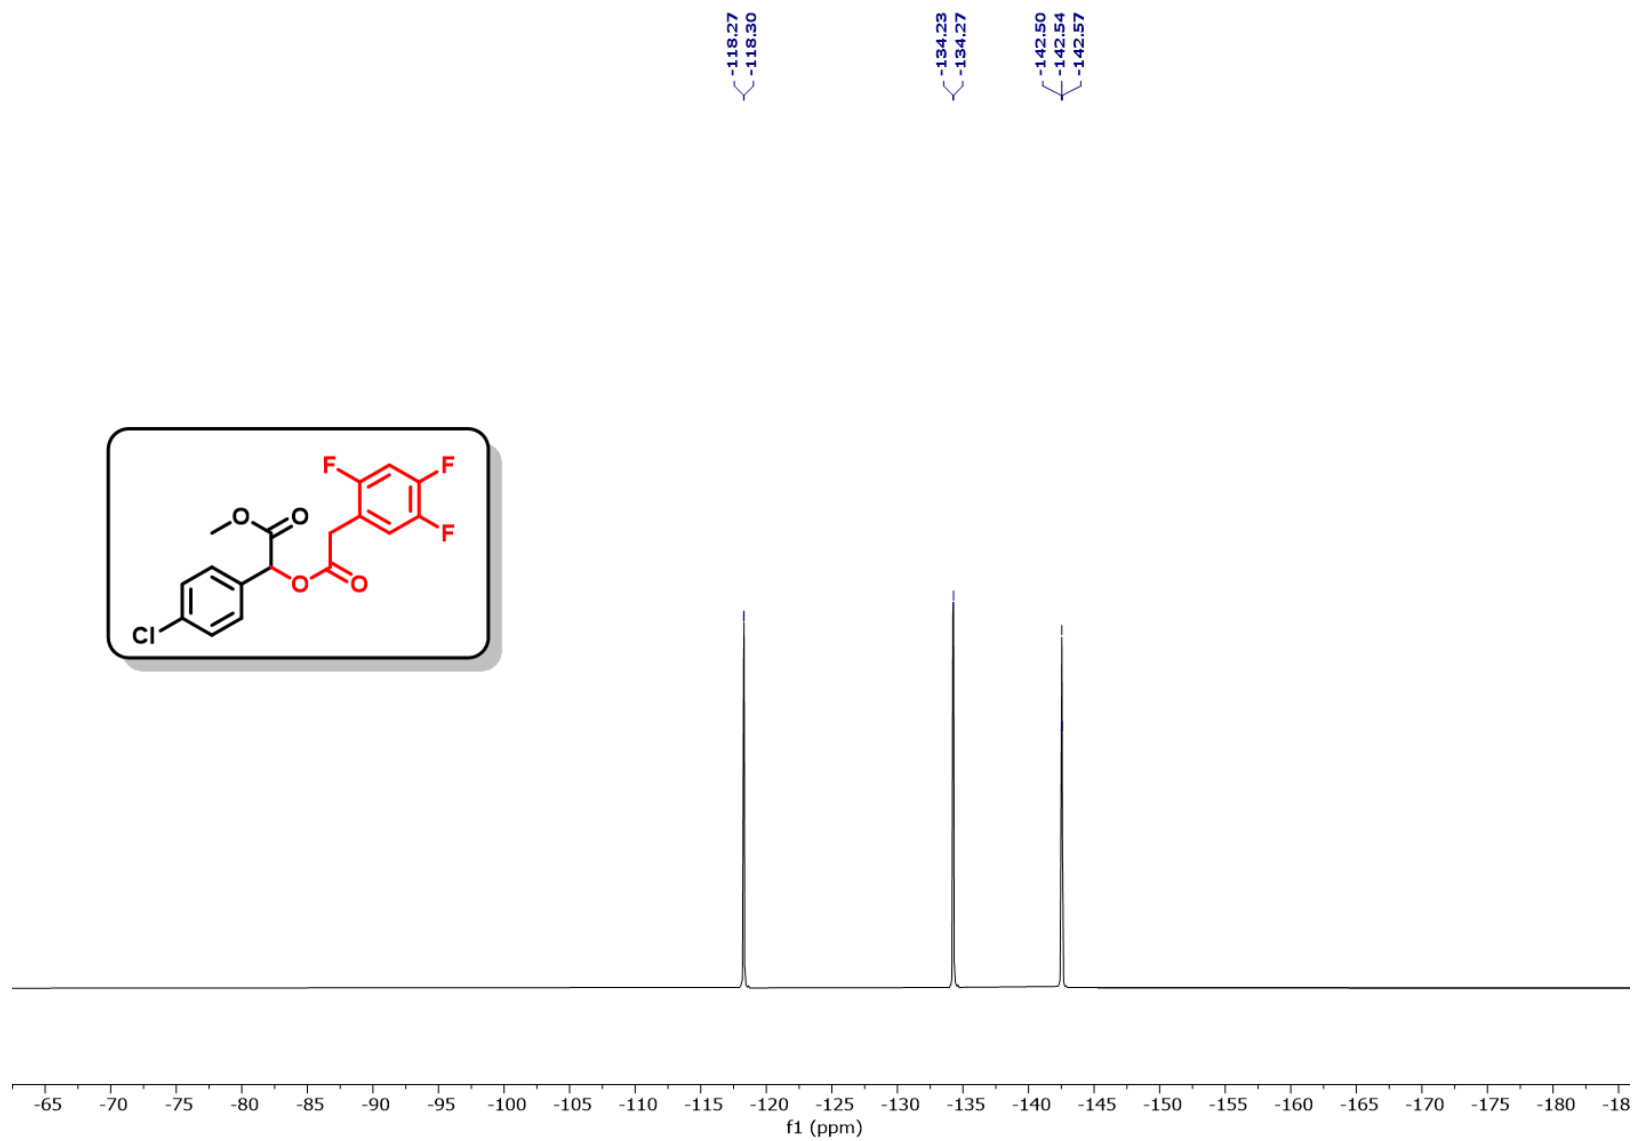

**Fig. S77.**  $^{19}\text{F}$  NMR (471 MHz,  $\text{CDCl}_3$ ) spectra of methyl 2-(4-chlorophenyl)-2-(2-(2,4,5-trifluorophenyl)acetoxy)acetate (**4g**).

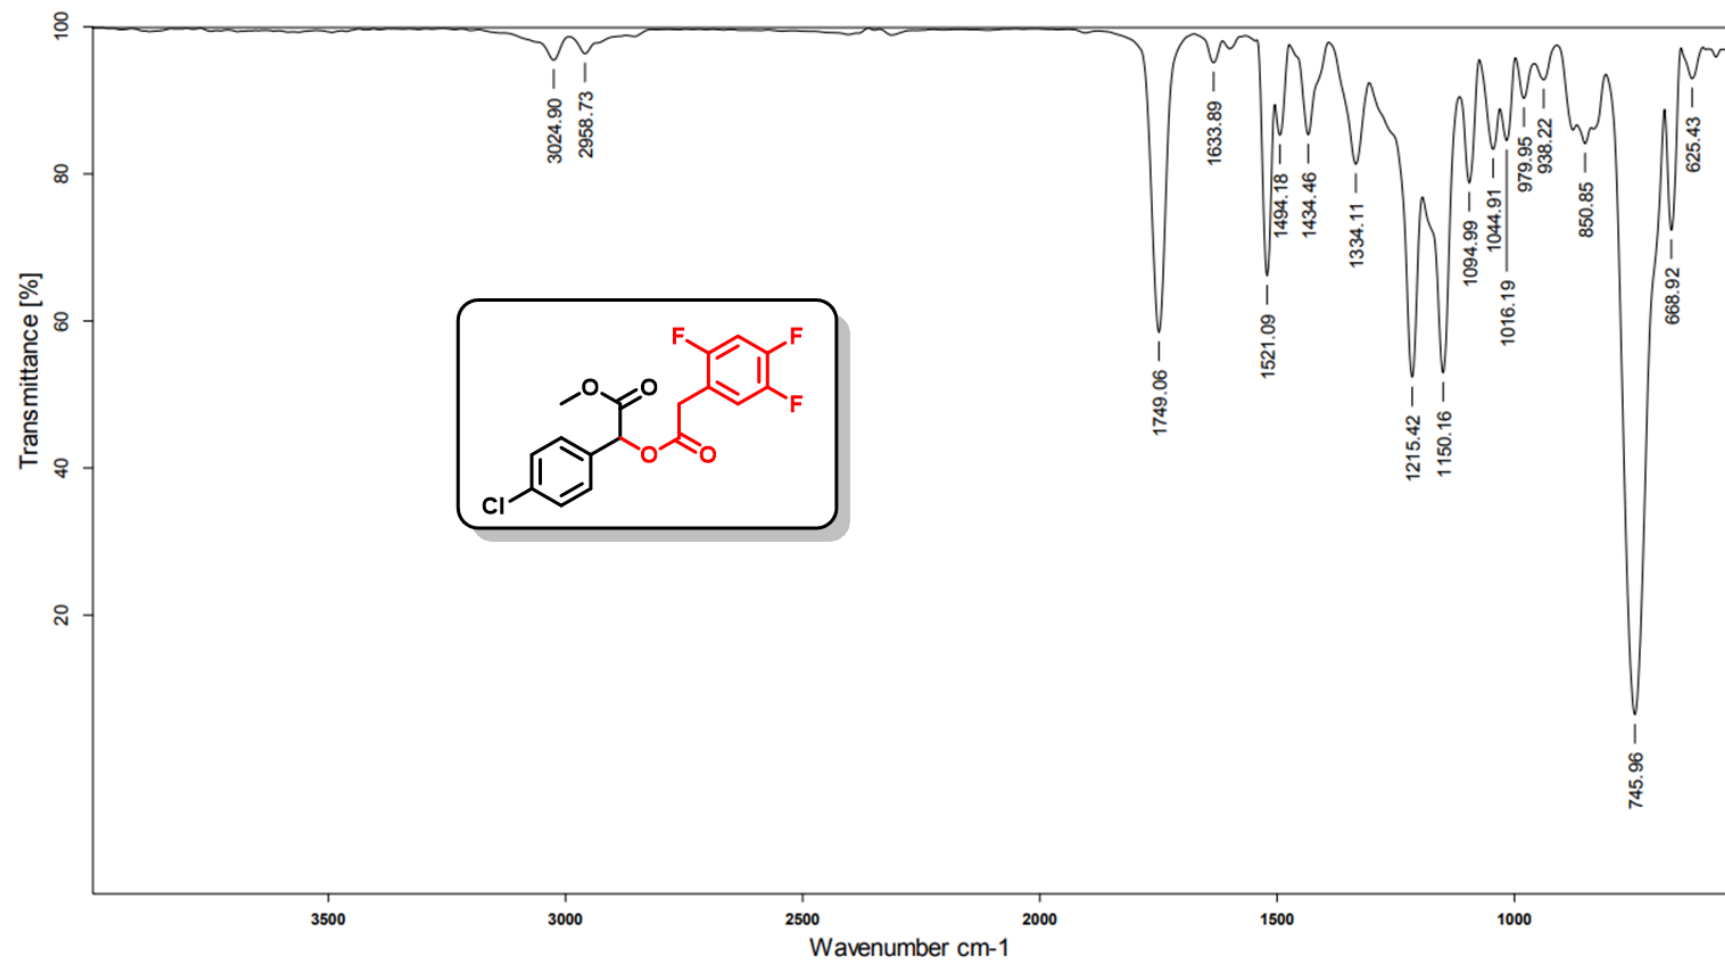

**Fig. S78.** IR spectra of spectra of methyl 2-(4-chlorophenyl)-2-(2-(2,4,5-trifluorophenyl)acetoxy)acetate (**4g**).

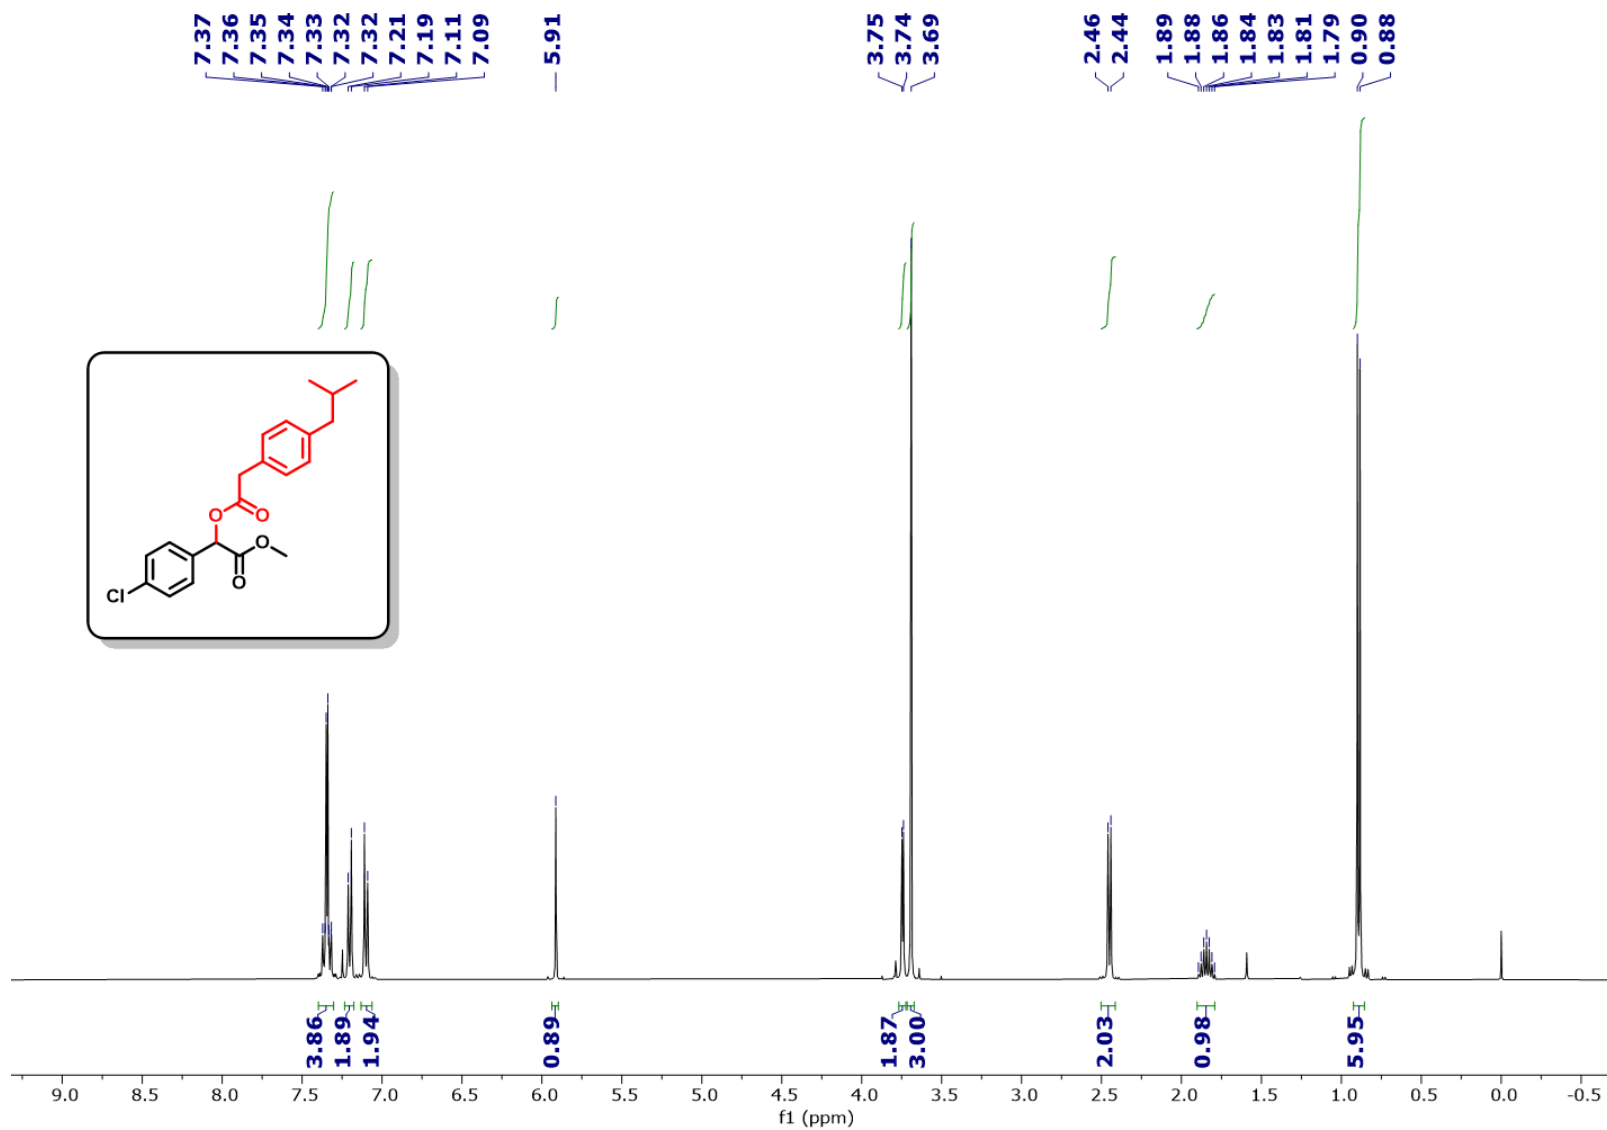

**Fig. S79.** <sup>1</sup>H NMR (400 MHz, CDCl<sub>3</sub>) spectra of methyl 2-(4-chlorophenyl)-2-(2-(4-isobutylphenyl)acetoxy)acetate (**4h**).



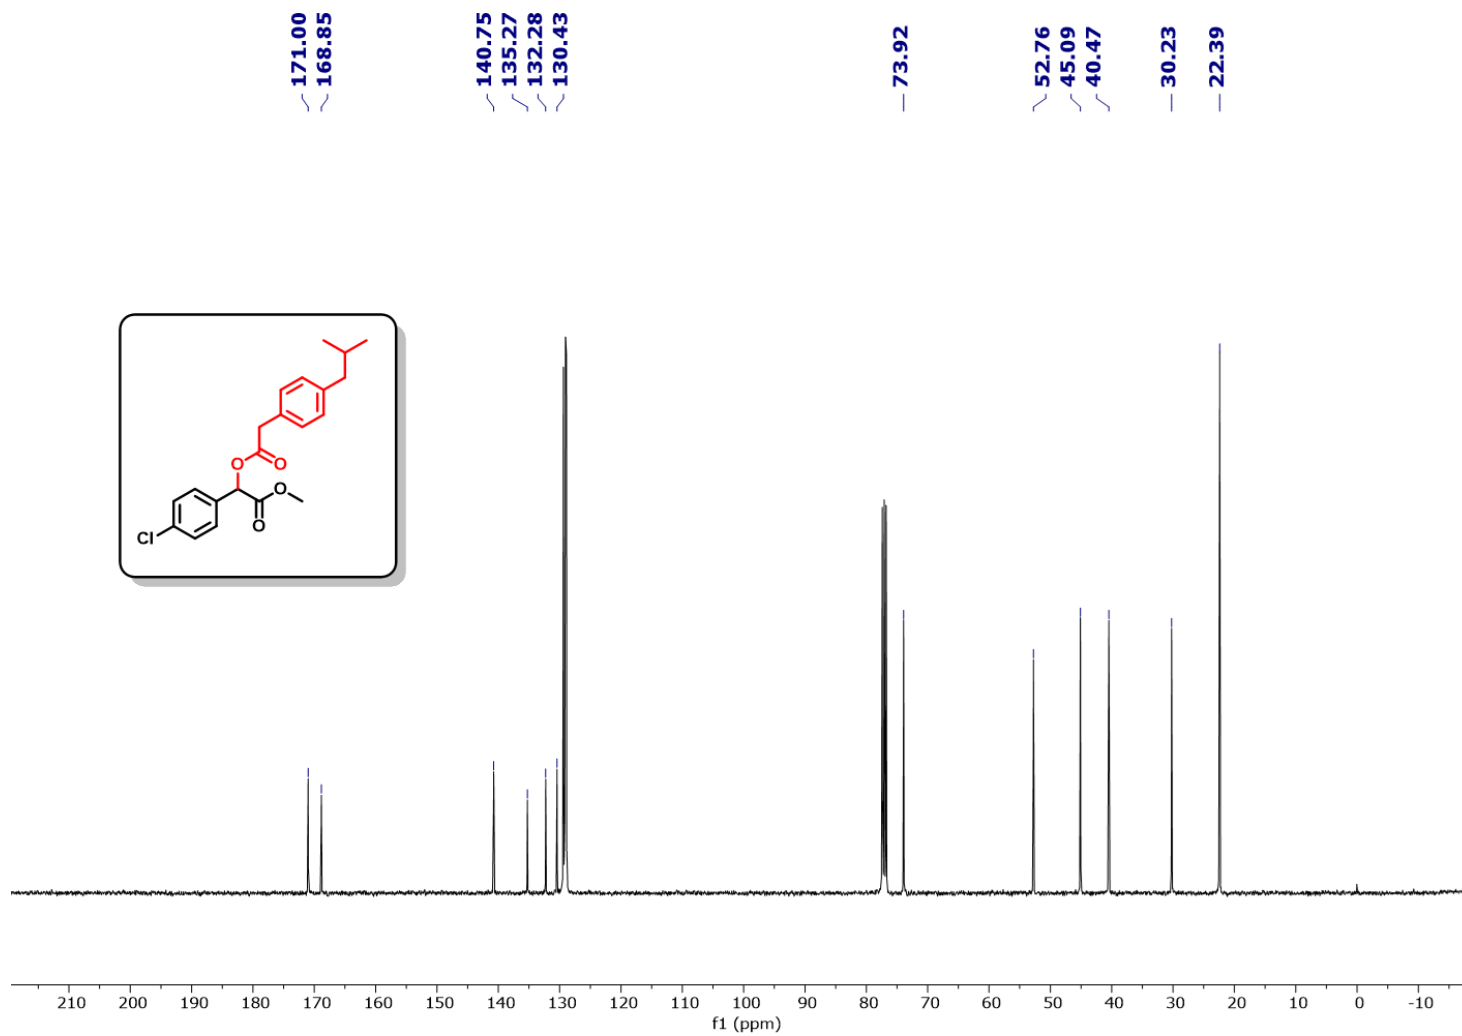

**Fig. S80.**  $^{13}\text{C}$  NMR (101 MHz,  $\text{CDCl}_3$ ) spectra of methyl 2-(4-chlorophenyl)-2-(2-(4-isobutylphenyl)acetoxy)acetate (**4h**).

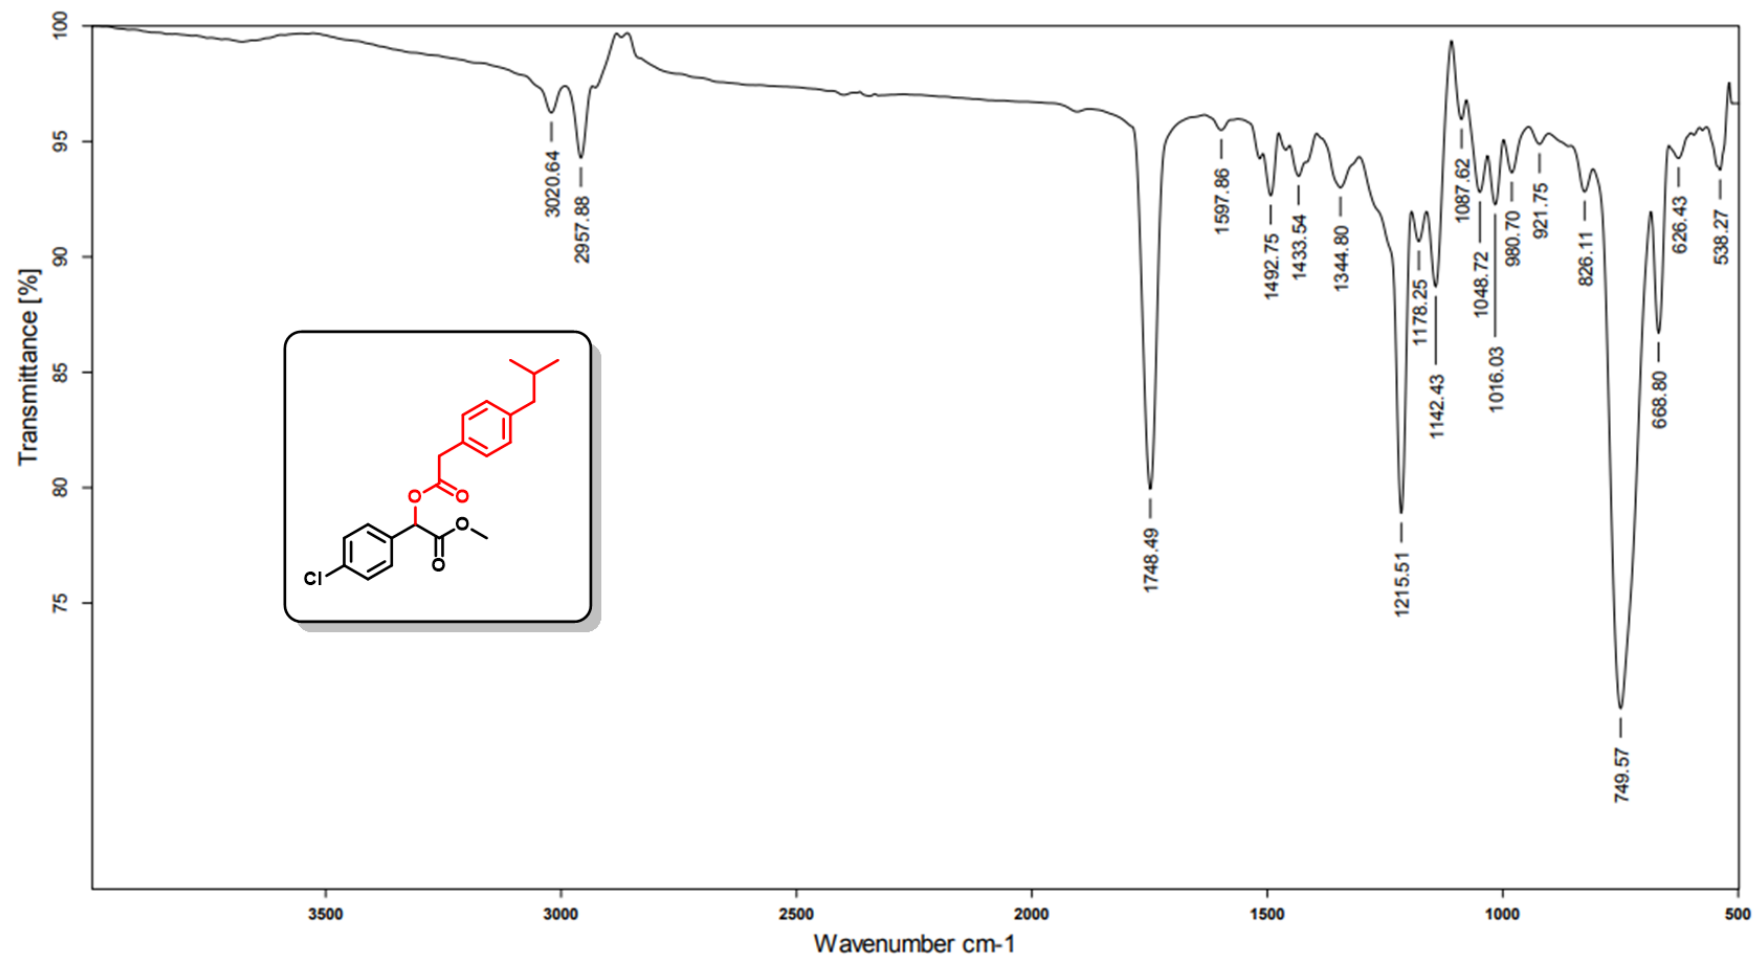

**Fig. S81.** IR spectra of spectra of methyl 2-(4-chlorophenyl)-2-(2-(4-isobutylphenyl)acetoxy)acetate (**4h**).



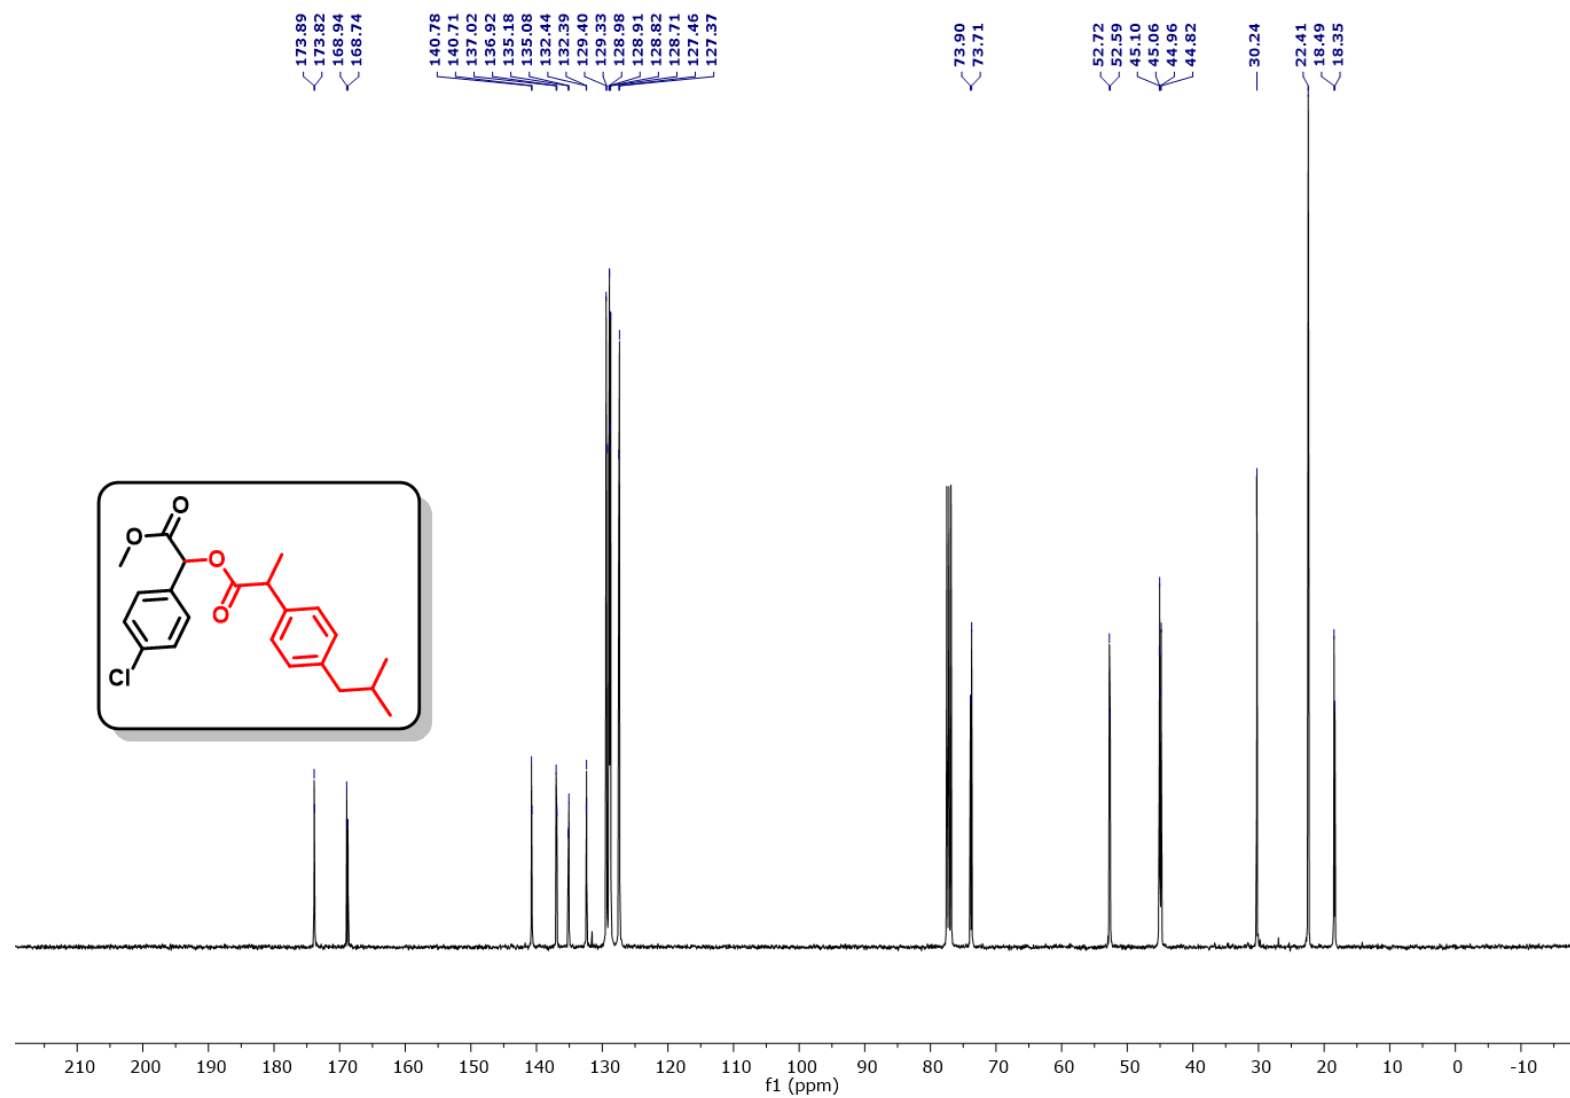

**Fig. S83.**  $^{13}\text{C}$  NMR (101 MHz,  $\text{CDCl}_3$ ) spectra of 1-(4-chlorophenyl)-2-methoxy-2-oxoethyl 2-(4-isobutylphenyl)propanoate (**4i**).

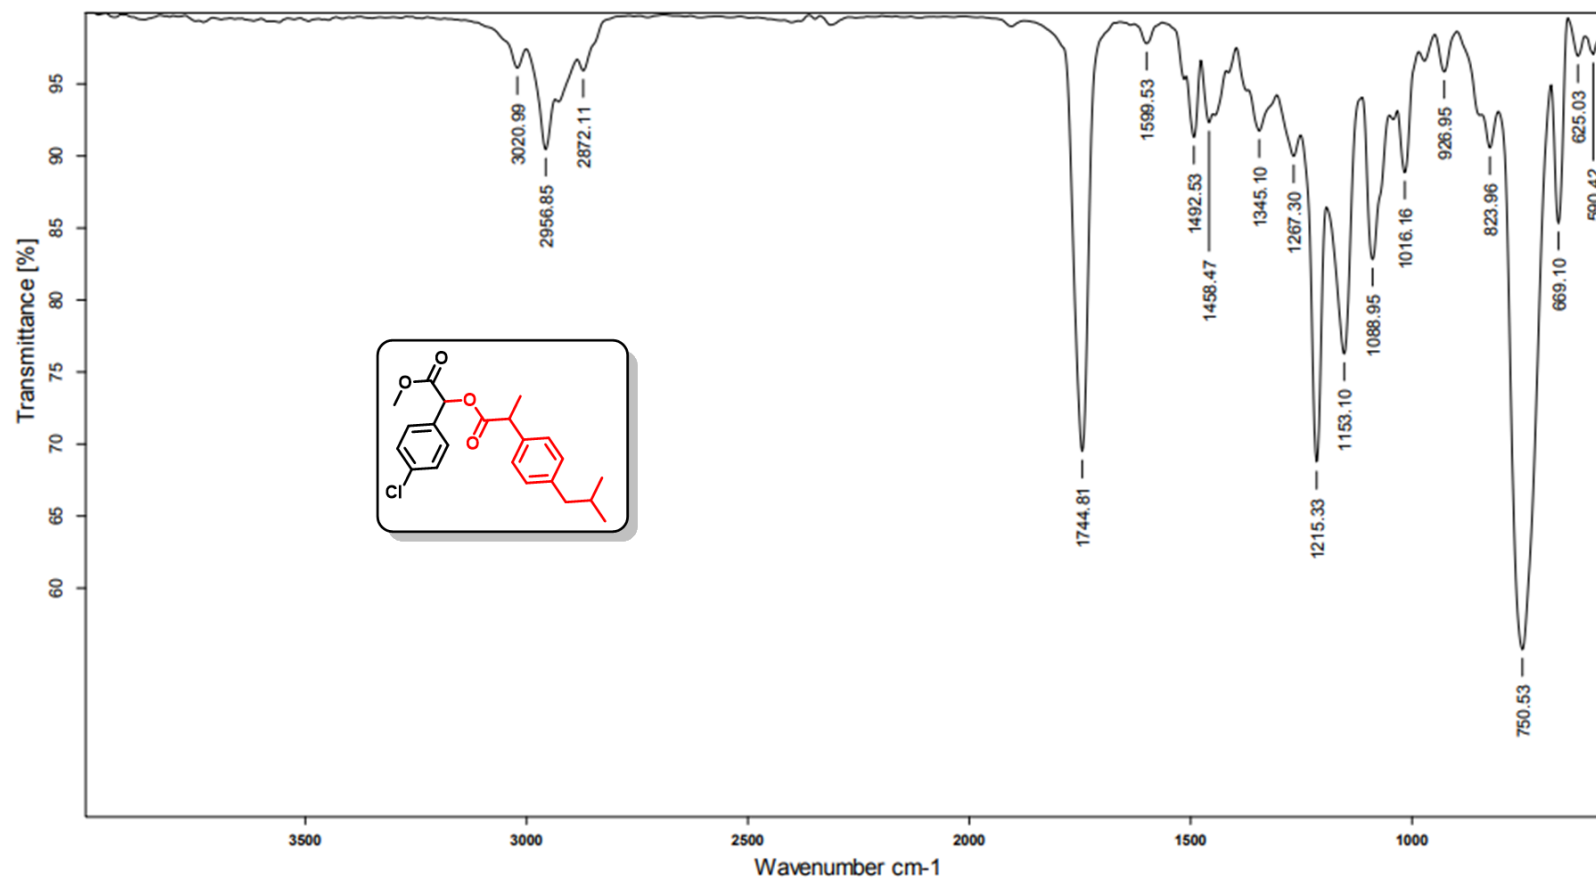

**Fig. S84.** IR spectra of spectra of 1-(4-chlorophenyl)-2-methoxy-2-oxoethyl 2-(4-isobutylphenyl)propanoate (**4i**).

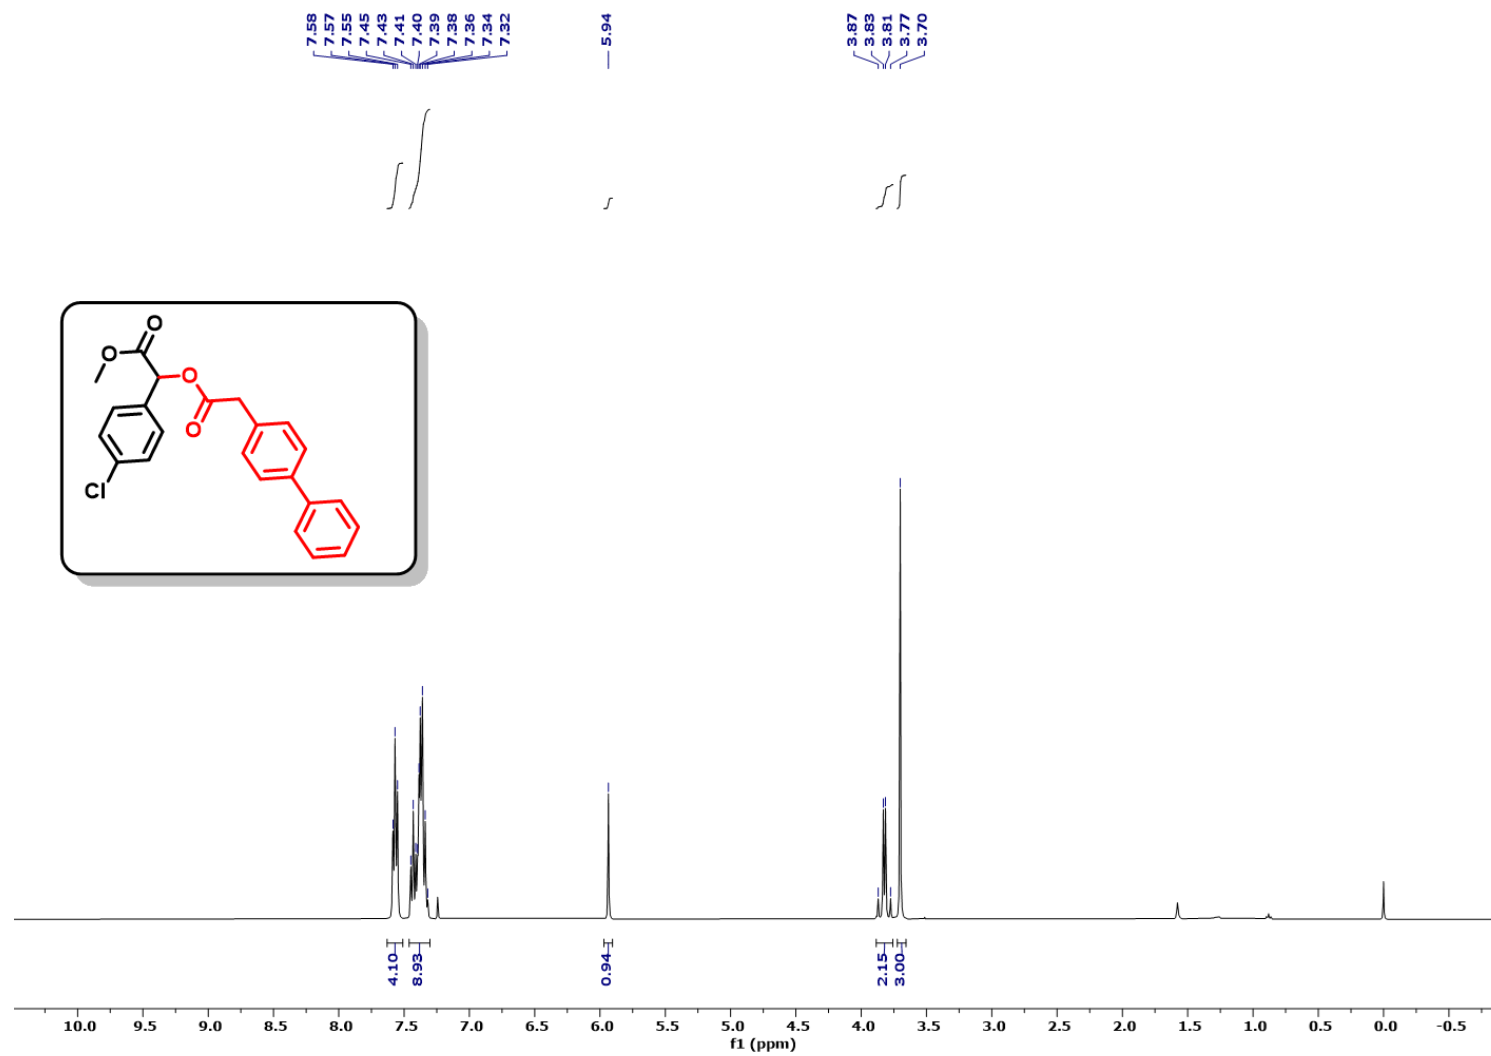

**Fig. S85.** <sup>1</sup>H NMR (400 MHz, CDCl<sub>3</sub>) spectra of methyl 2-(2-([1,1'-biphenyl]-4-yl)acetoxy)-2-(4-chlorophenyl)acetate (**4j**).

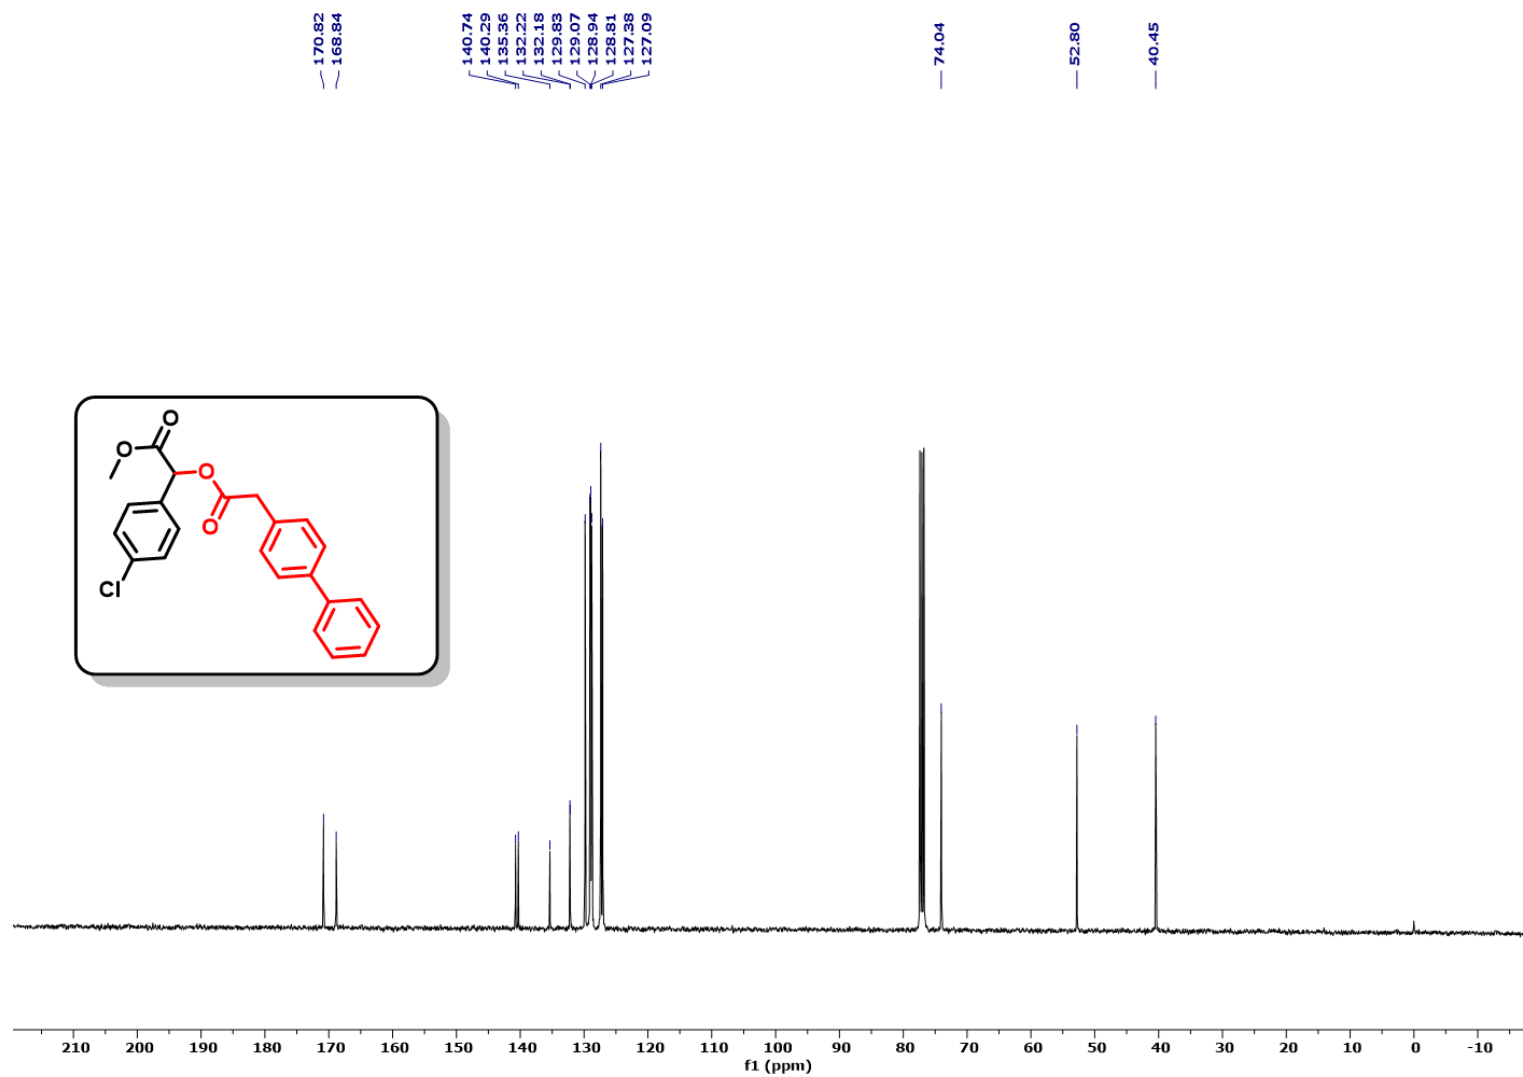

**Fig. S86.** <sup>13</sup>C NMR (101 MHz, CDCl<sub>3</sub>) spectra of methyl 2-(2-([1,1'-biphenyl]-4-yl)acetoxy)-2-(4-chlorophenyl)acetate (**4j**).

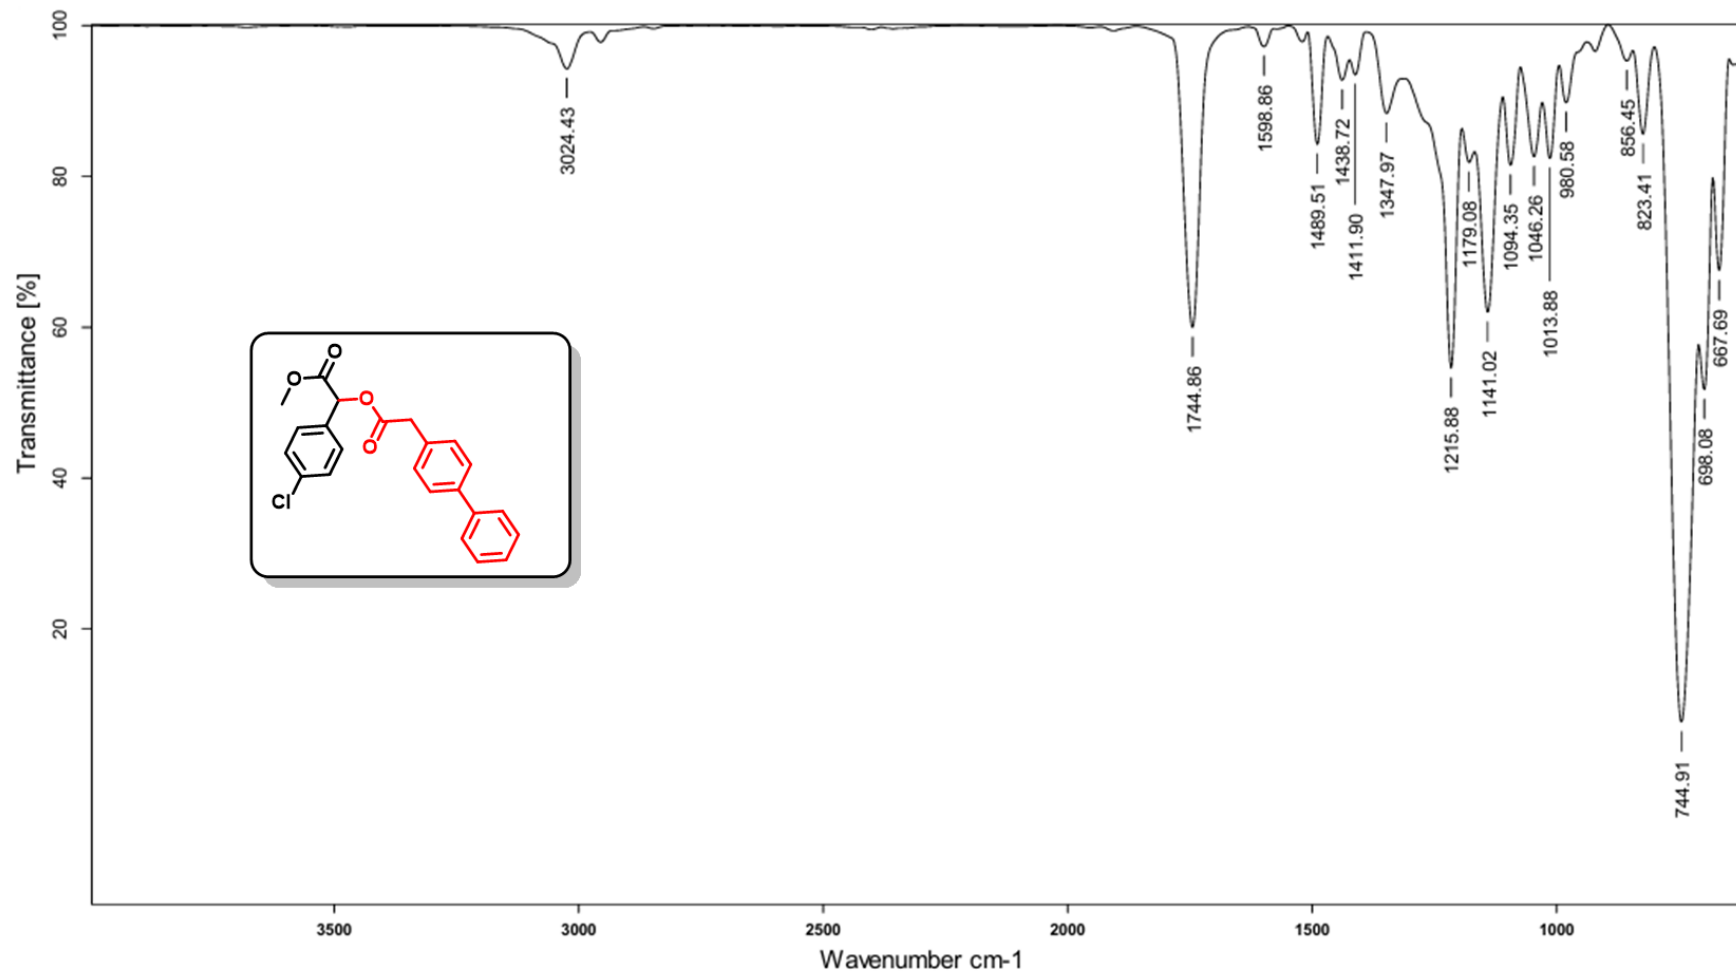

**Fig. S87.** IR spectra of spectra of methyl 2-(2-([1,1'-biphenyl]-4-yl)acetoxy)-2-(4-chlorophenyl)acetate (**4j**).



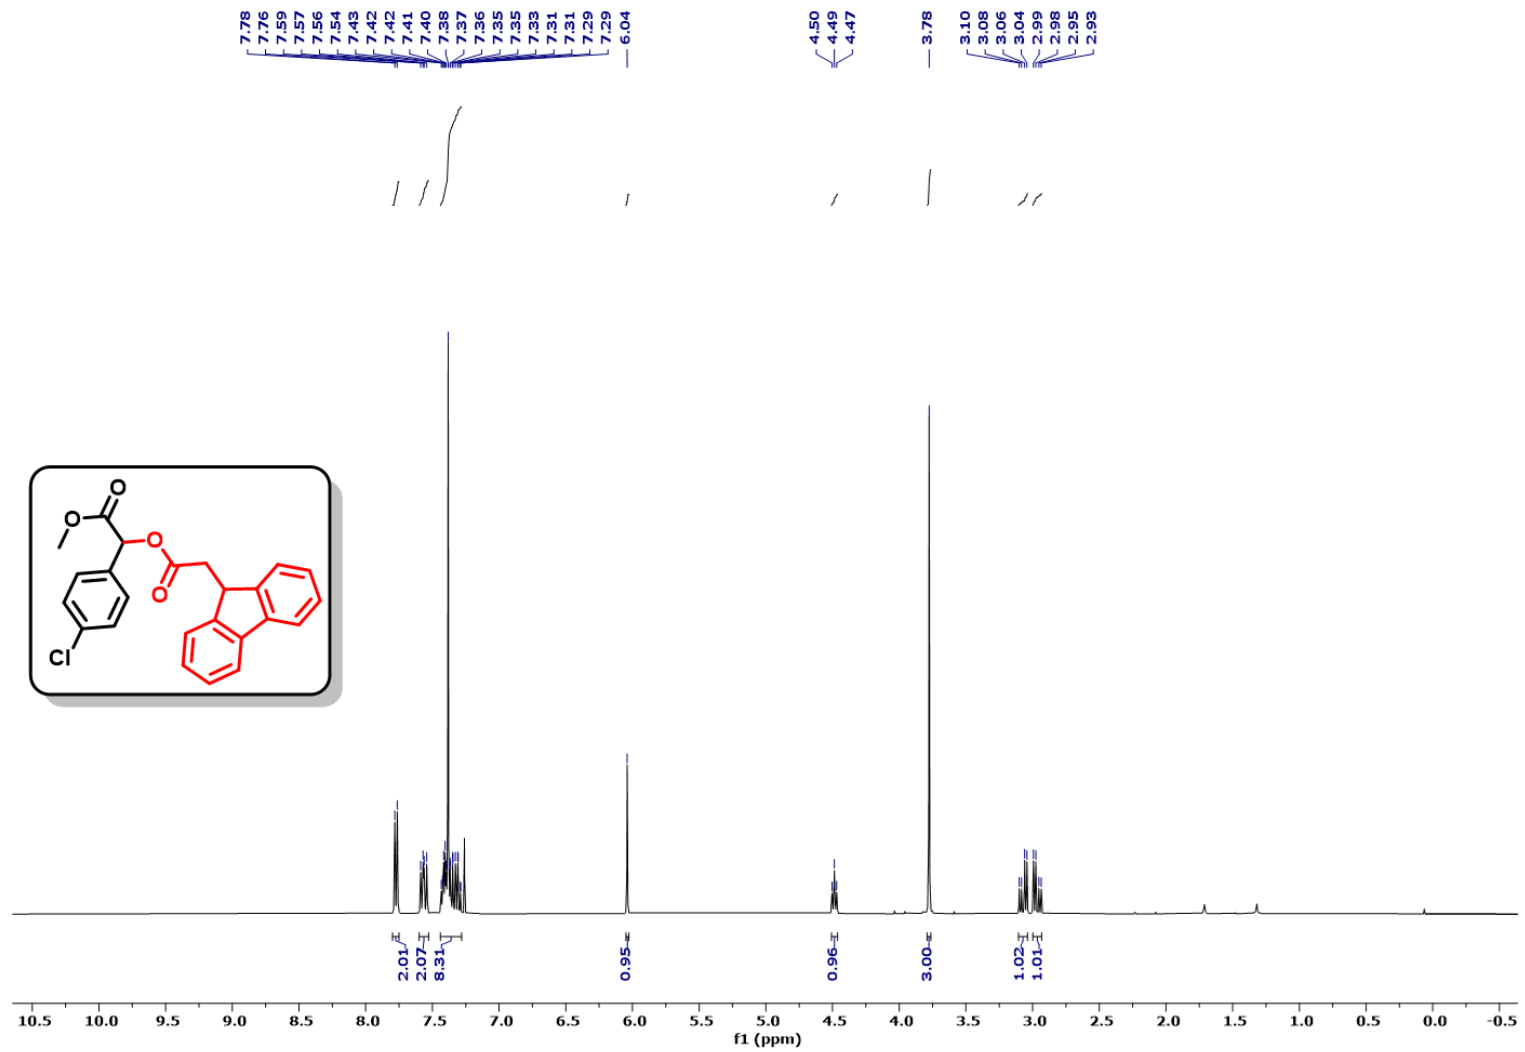

**Fig. S88.** <sup>1</sup>H NMR (400 MHz, CDCl<sub>3</sub>) spectra of methyl 2-(2-(9H-fluoren-9-yl)acetoxy)-2-(4-chlorophenyl)acetate (**4k**).

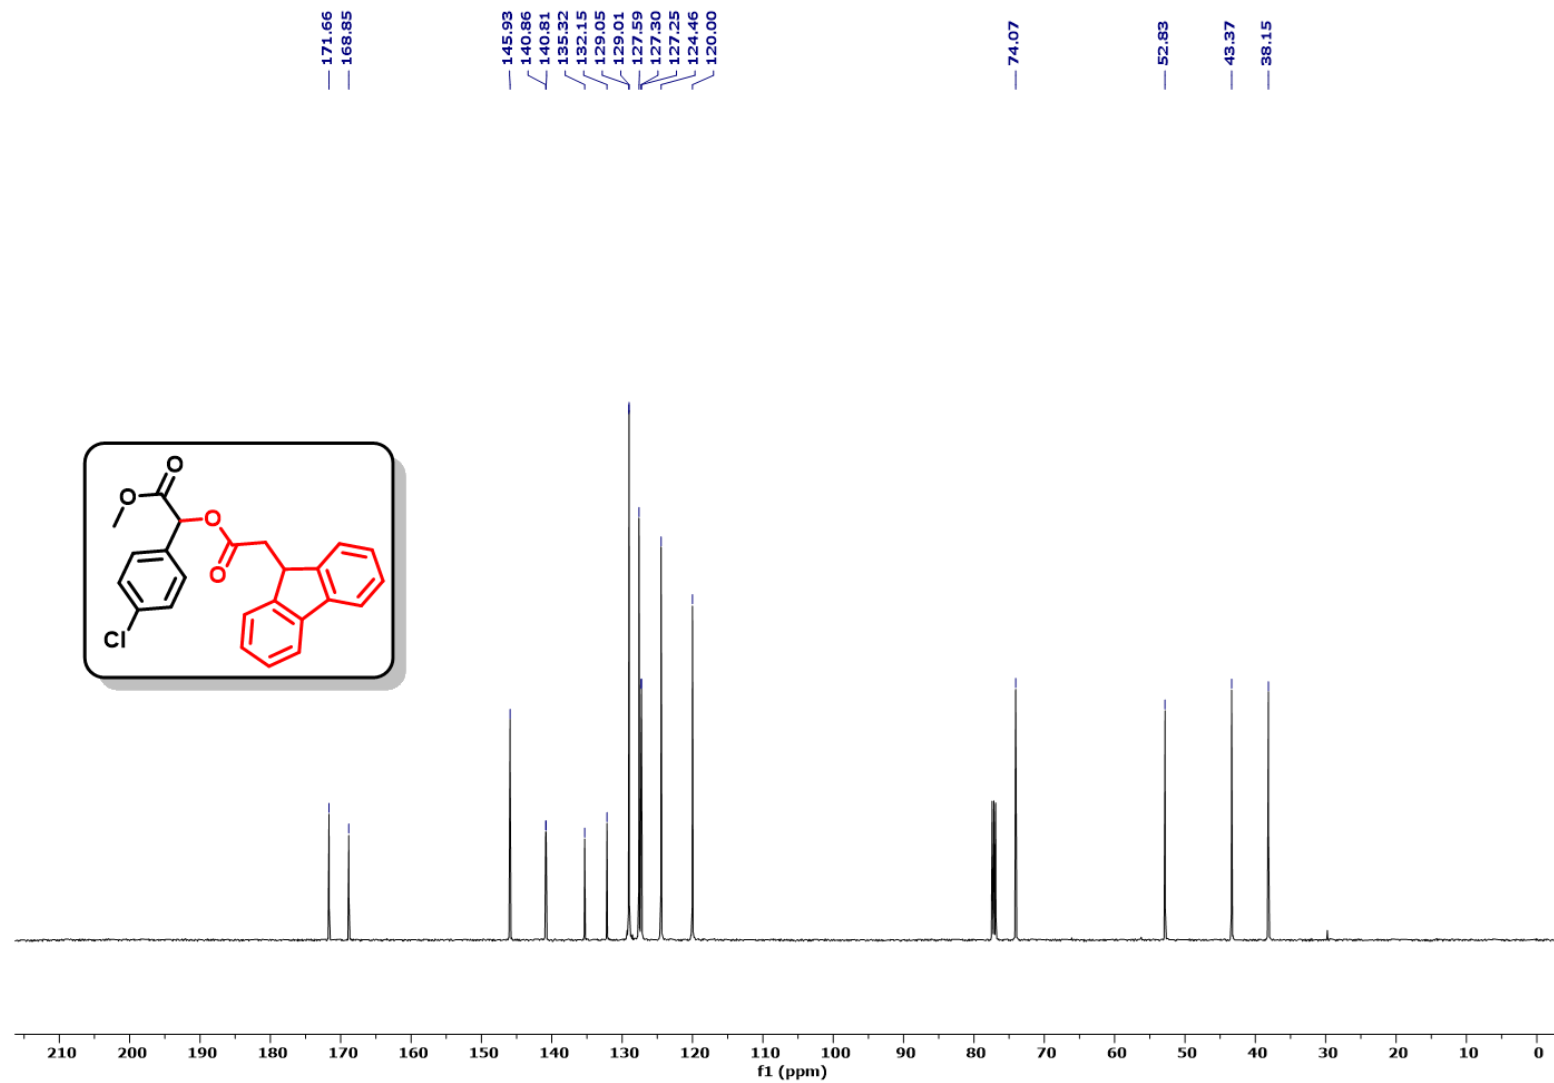

**Fig. S89.**  $^{13}\text{C}$  NMR (126 MHz,  $\text{CDCl}_3$ ) spectra of methyl 2-(2-(9H-fluoren-9-yl)acetoxy)-2-(4-chlorophenyl)acetate (**4k**).

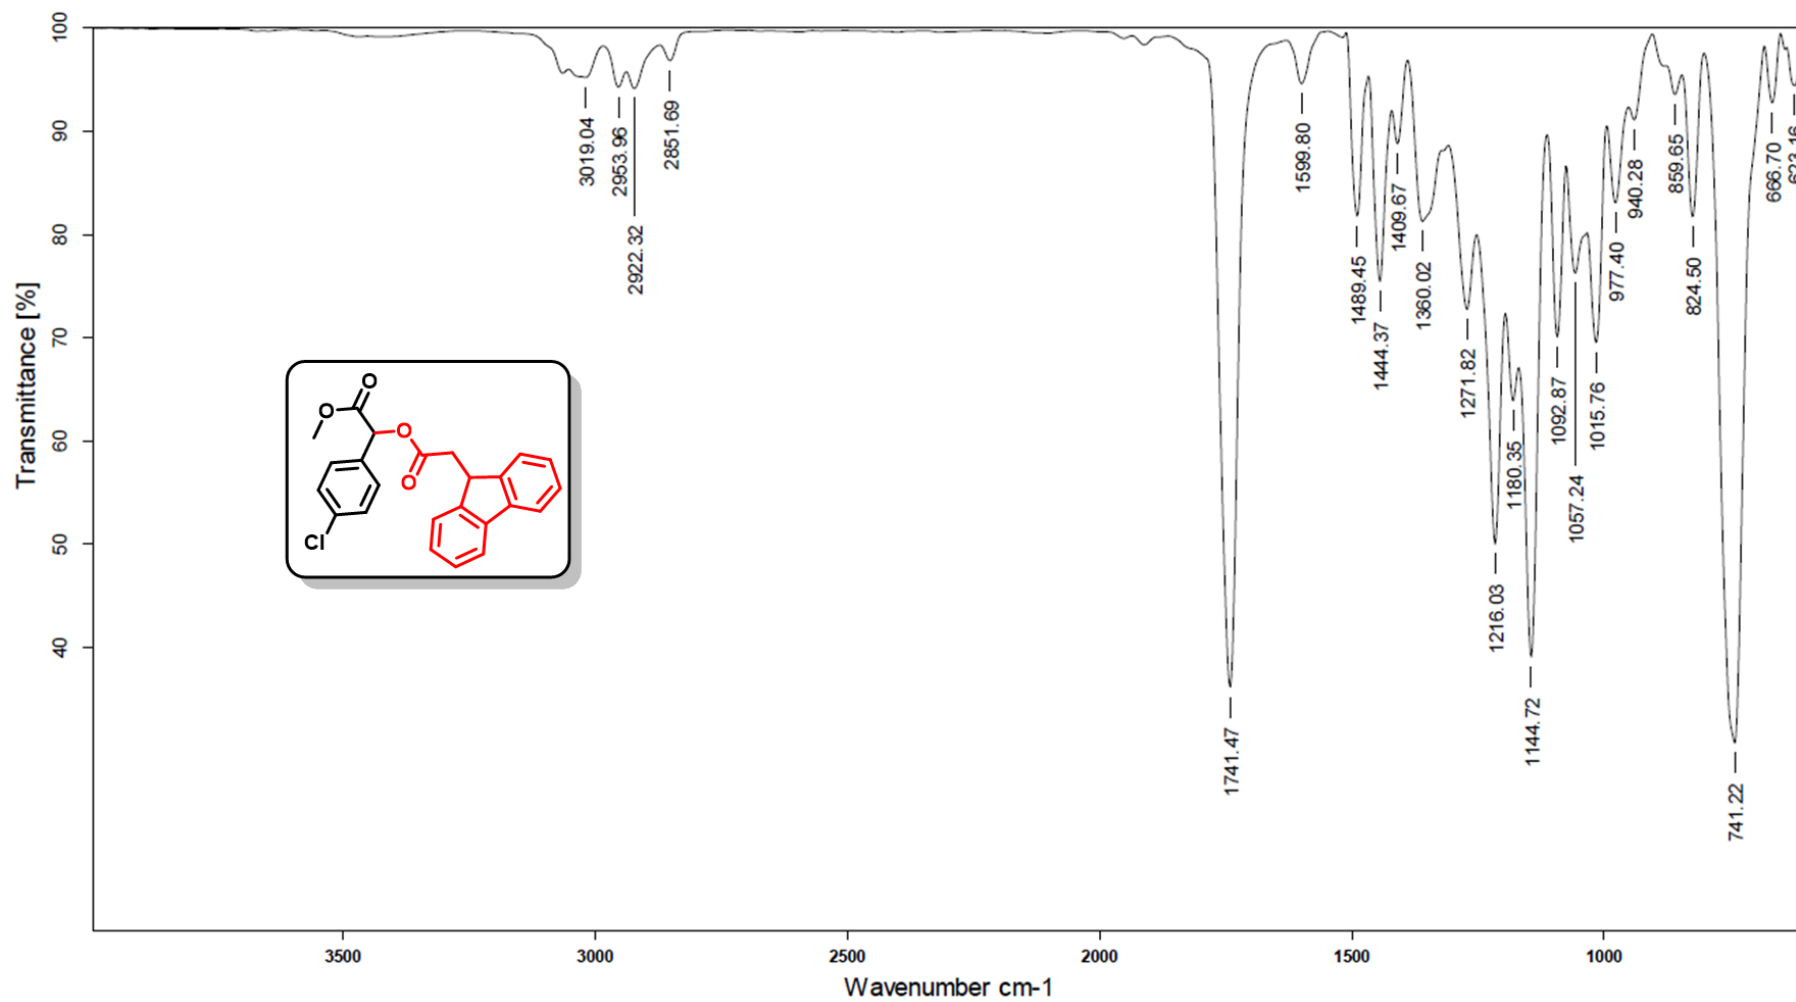

**Fig. S90.** IR spectra of spectra of methyl 2-(2-(9H-fluoren-9-yl)acetoxy)-2-(4-chlorophenyl)acetate (**4k**).

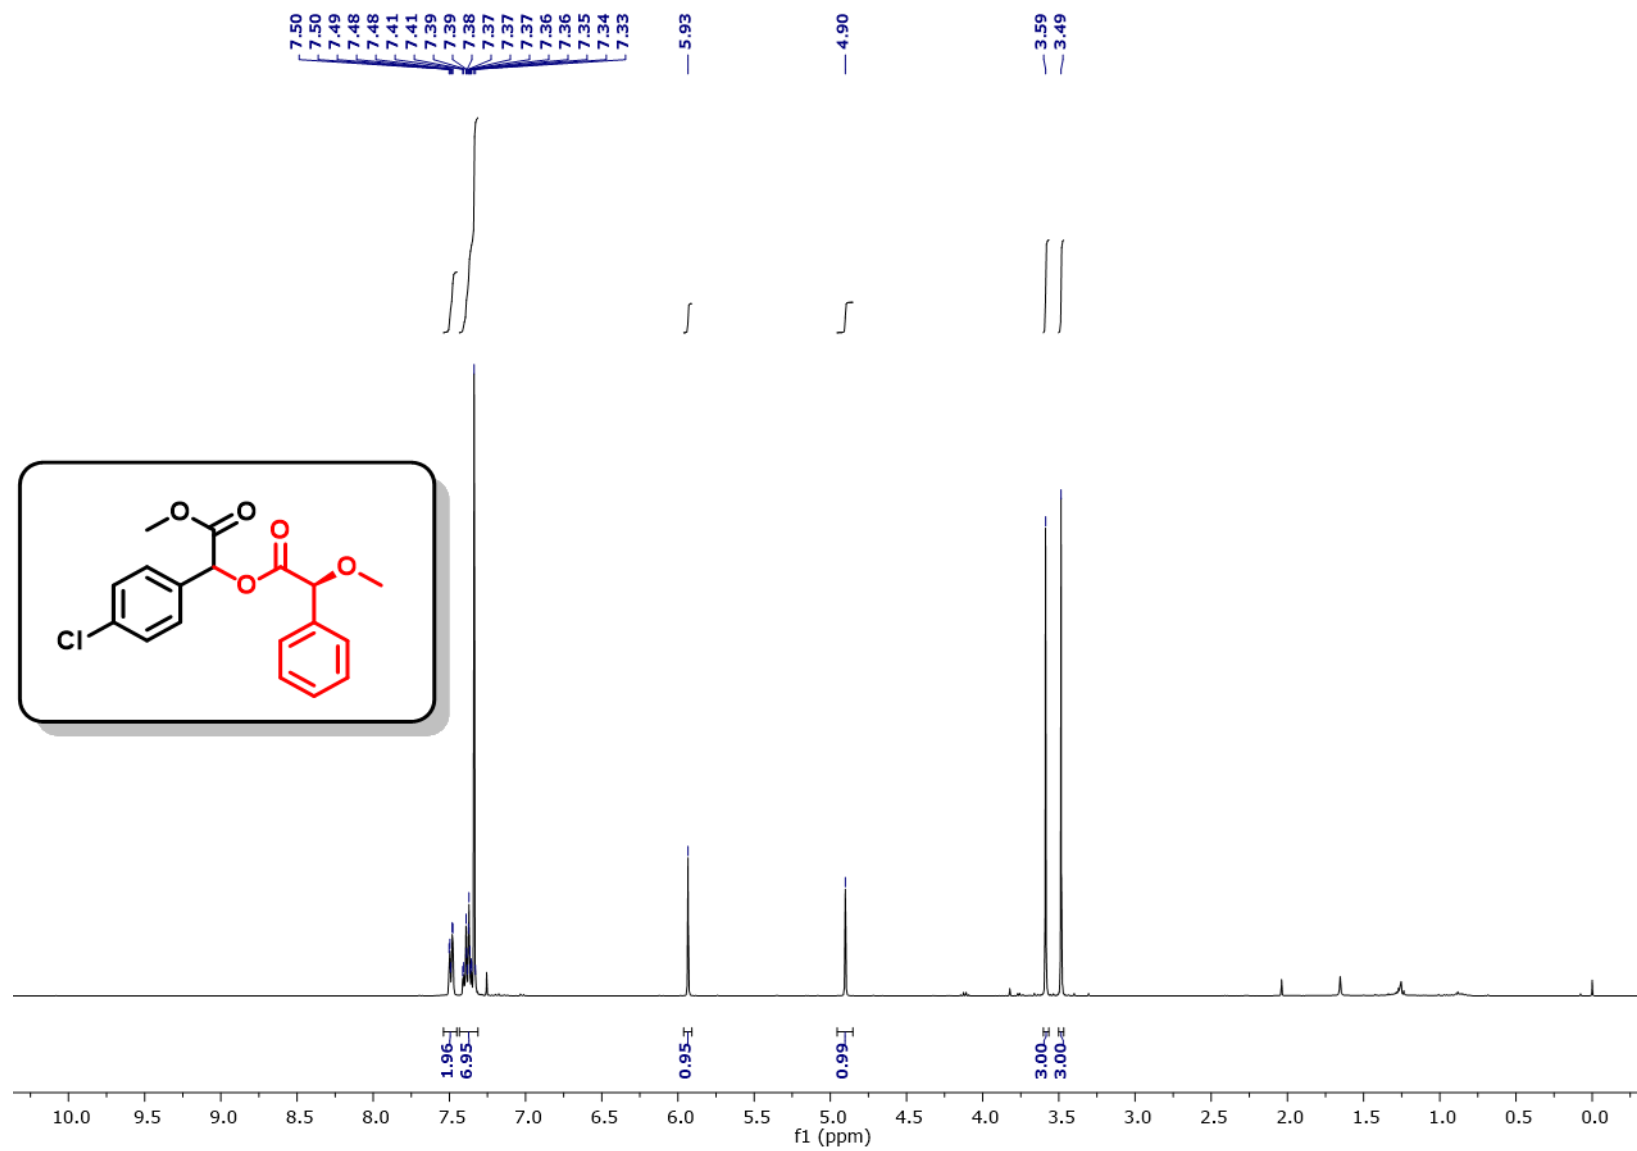

**Fig. S91.** <sup>1</sup>H NMR (400 MHz, CDCl<sub>3</sub>) spectra of . 1-(4-Chlorophenyl)-2-methoxy-2-oxoethyl (2S)-2-methoxy-2-phenylacetate (**41**).

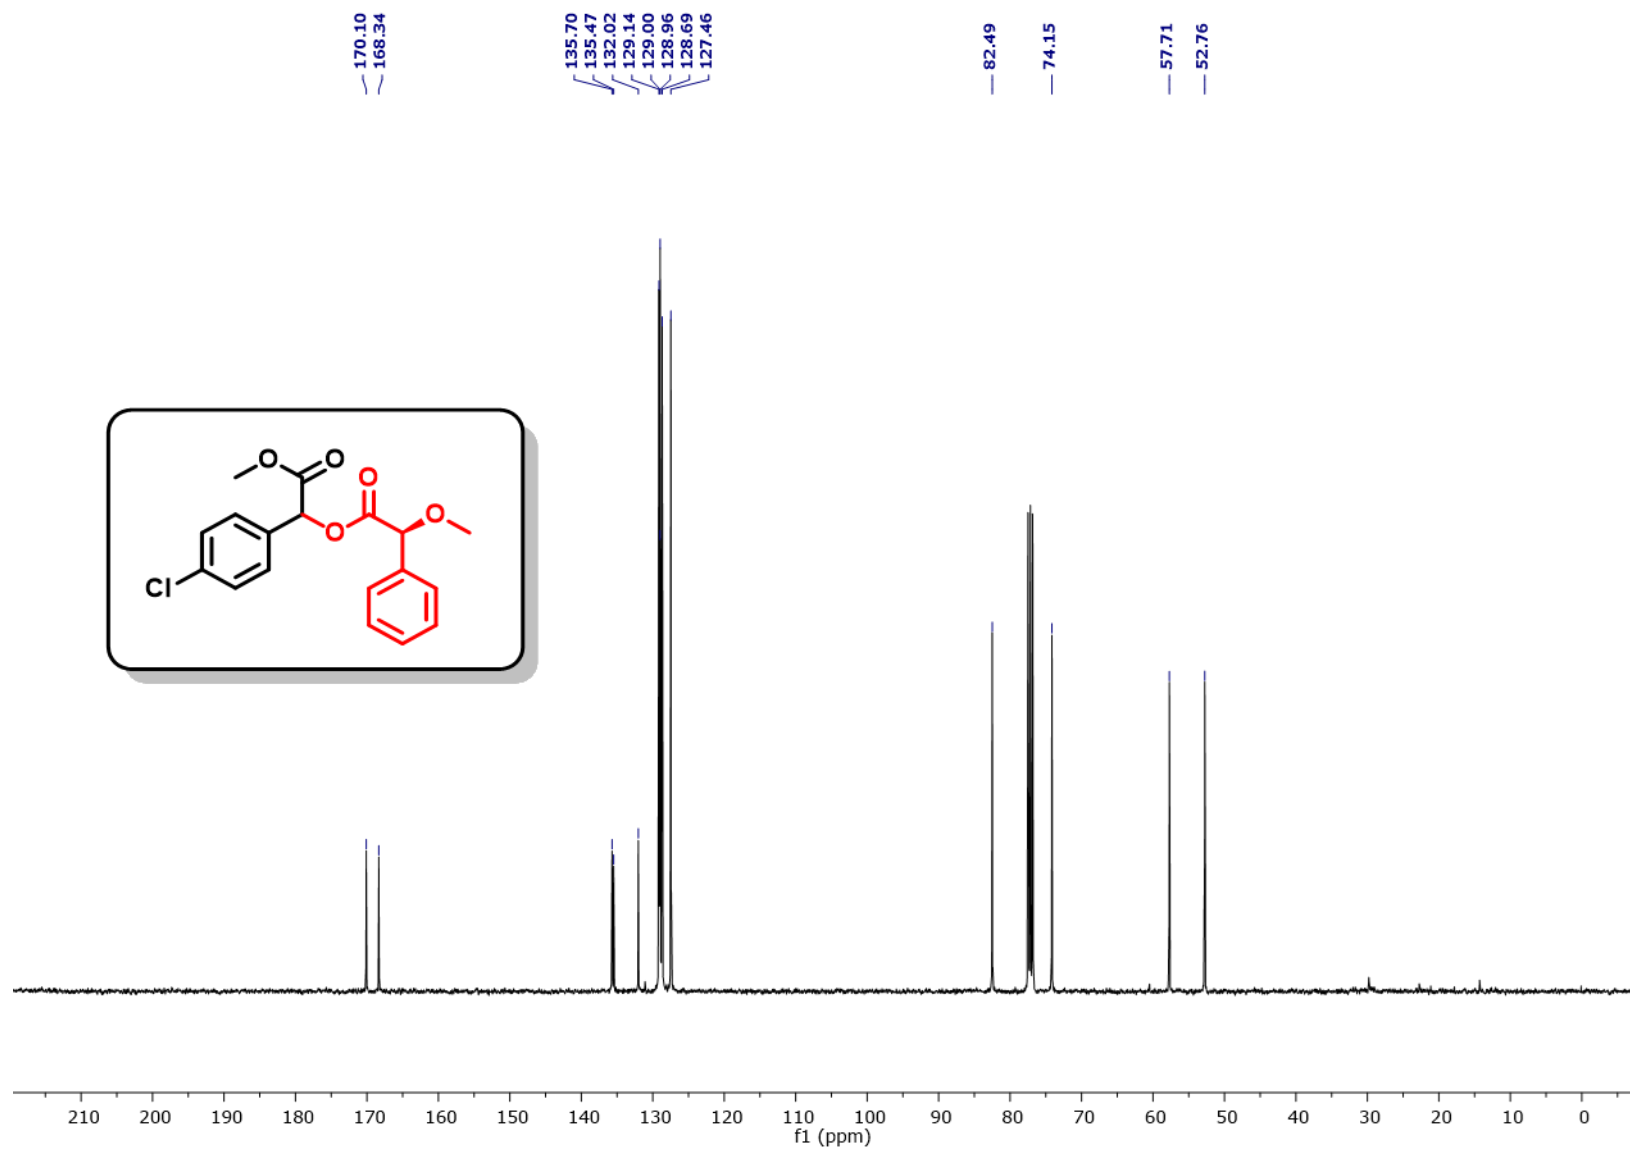

**Fig. S92.** <sup>13</sup>C NMR (101 MHz, CDCl<sub>3</sub>) spectra of 1-(4-Chlorophenyl)-2-methoxy-2-oxoethyl (2S)-2-methoxy-2-phenylacetate (**4I**).

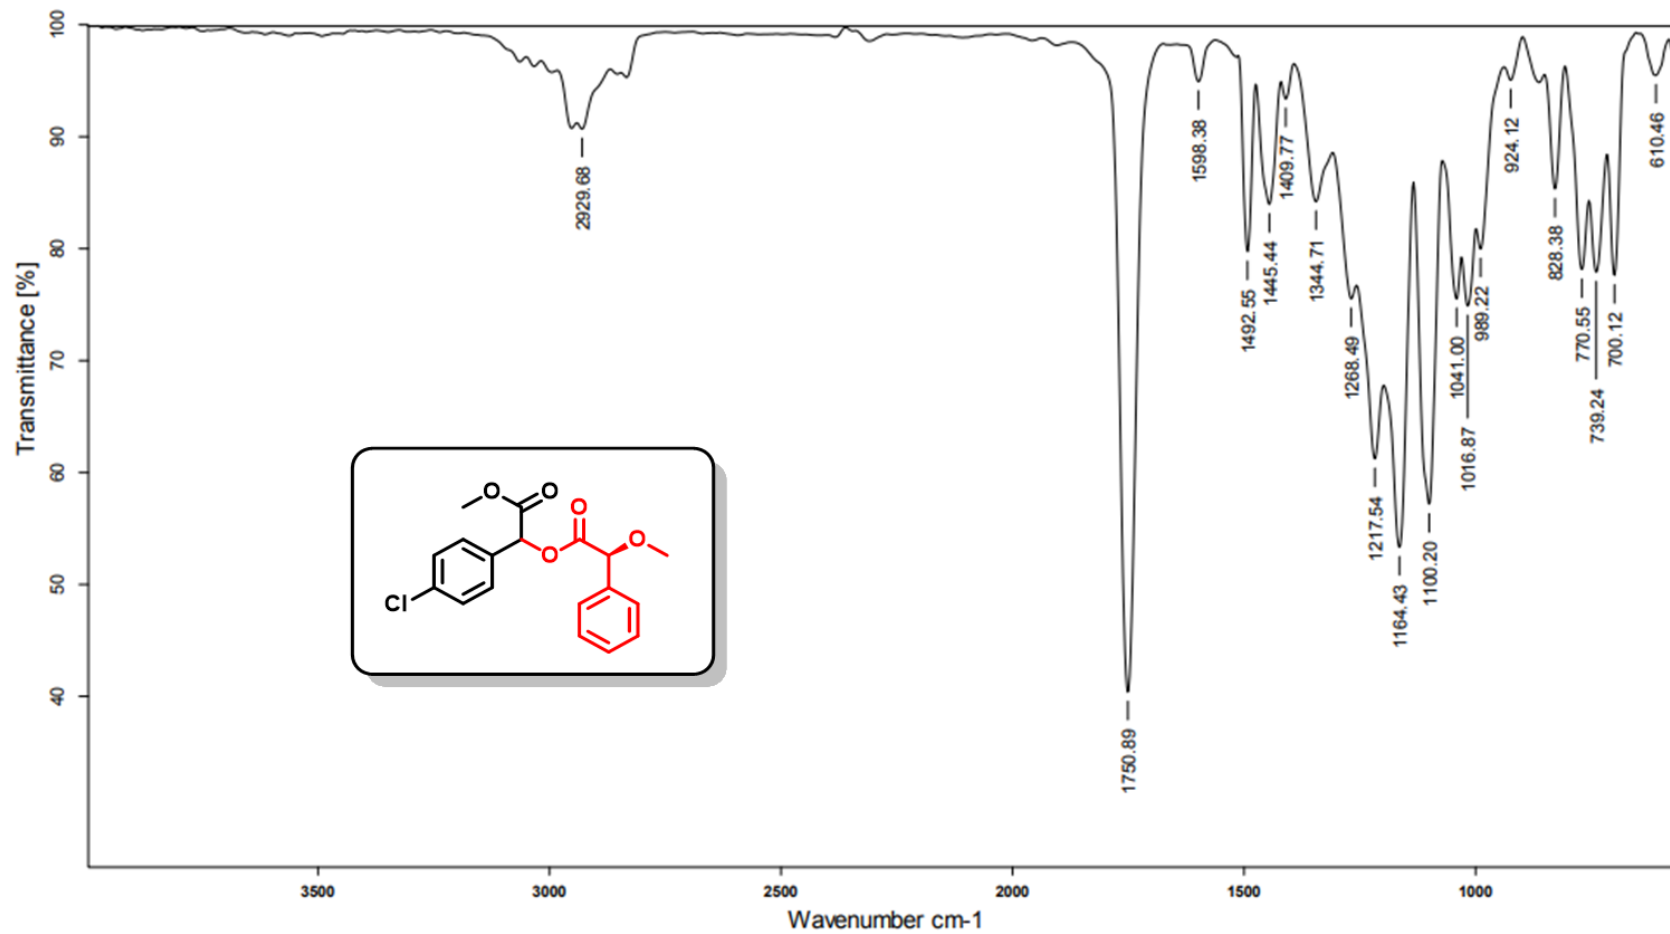

**Fig. S93.** IR spectra of spectra of 1-(4-Chlorophenyl)-2-methoxy-2-oxoethyl (2S)-2-methoxy-2-phenylacetate (**41**).

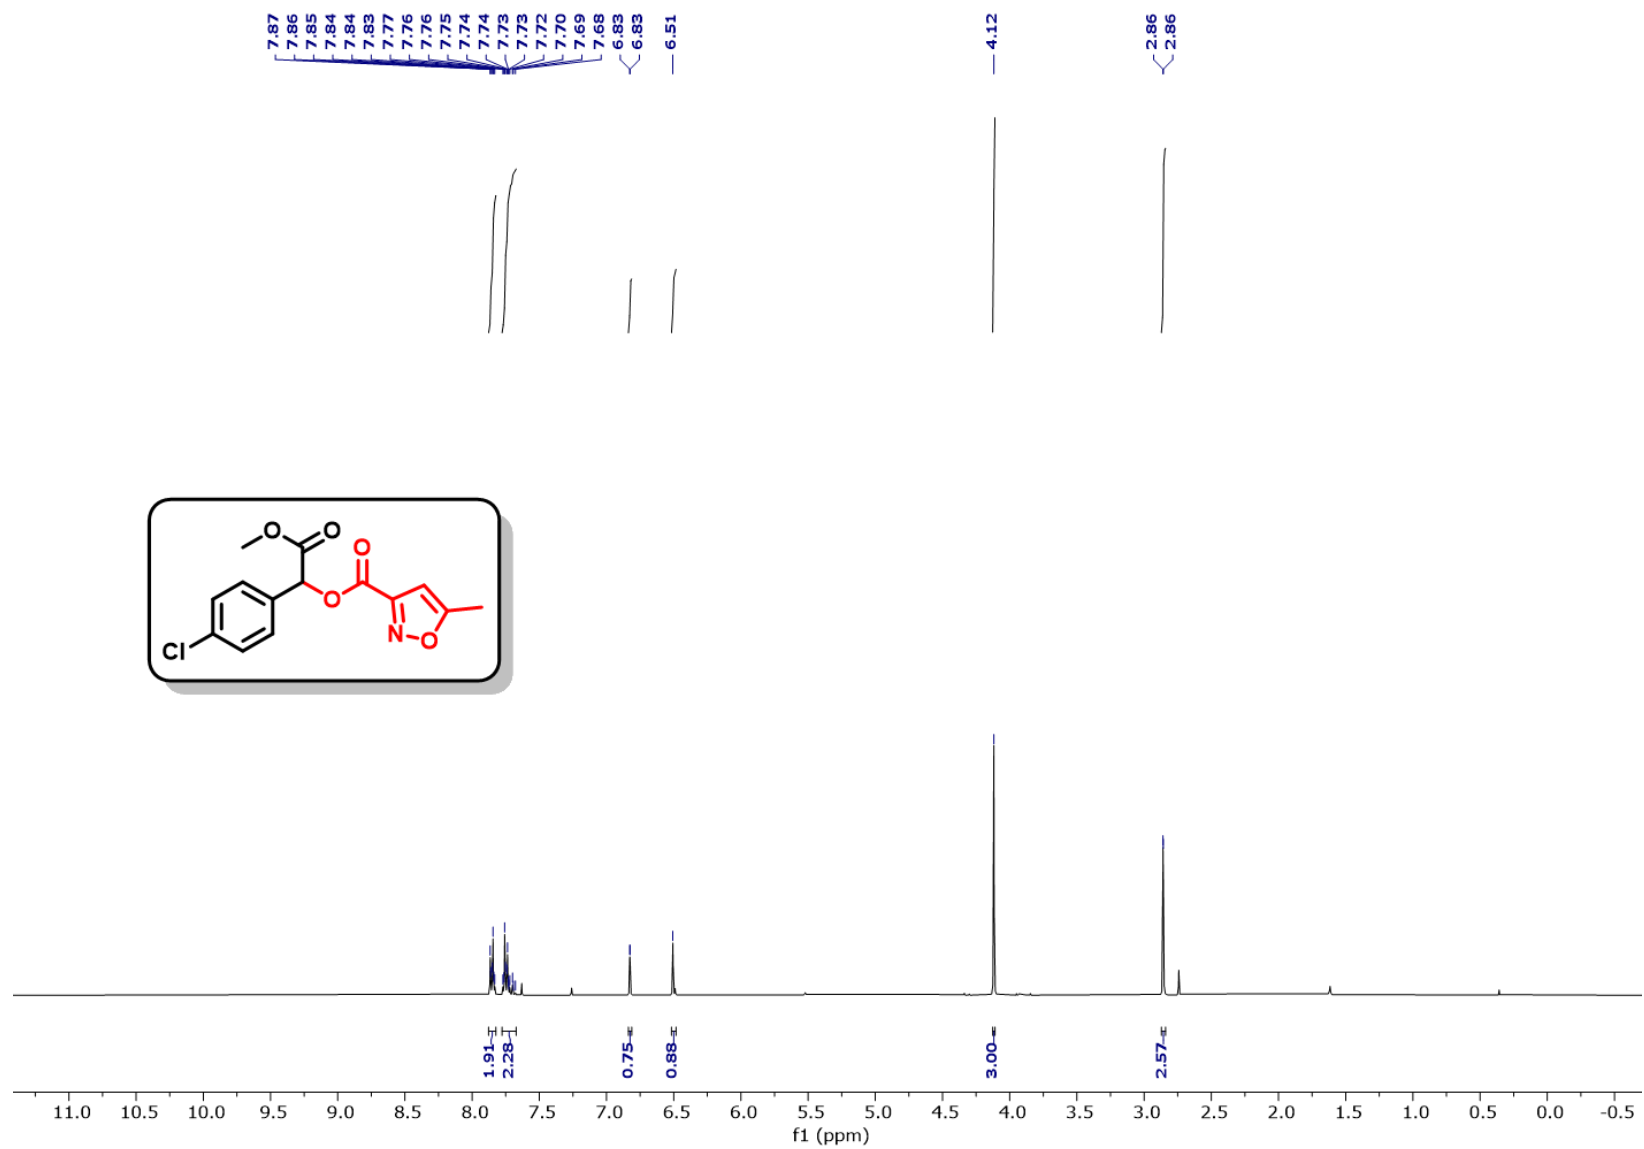

**Fig. S94.** <sup>1</sup>H NMR (400 MHz, CDCl<sub>3</sub>) spectra of 1-(4-chlorophenyl)-2-methoxy-2-oxoethyl 5-methylisoxazole-3-carboxylate (**4m**).

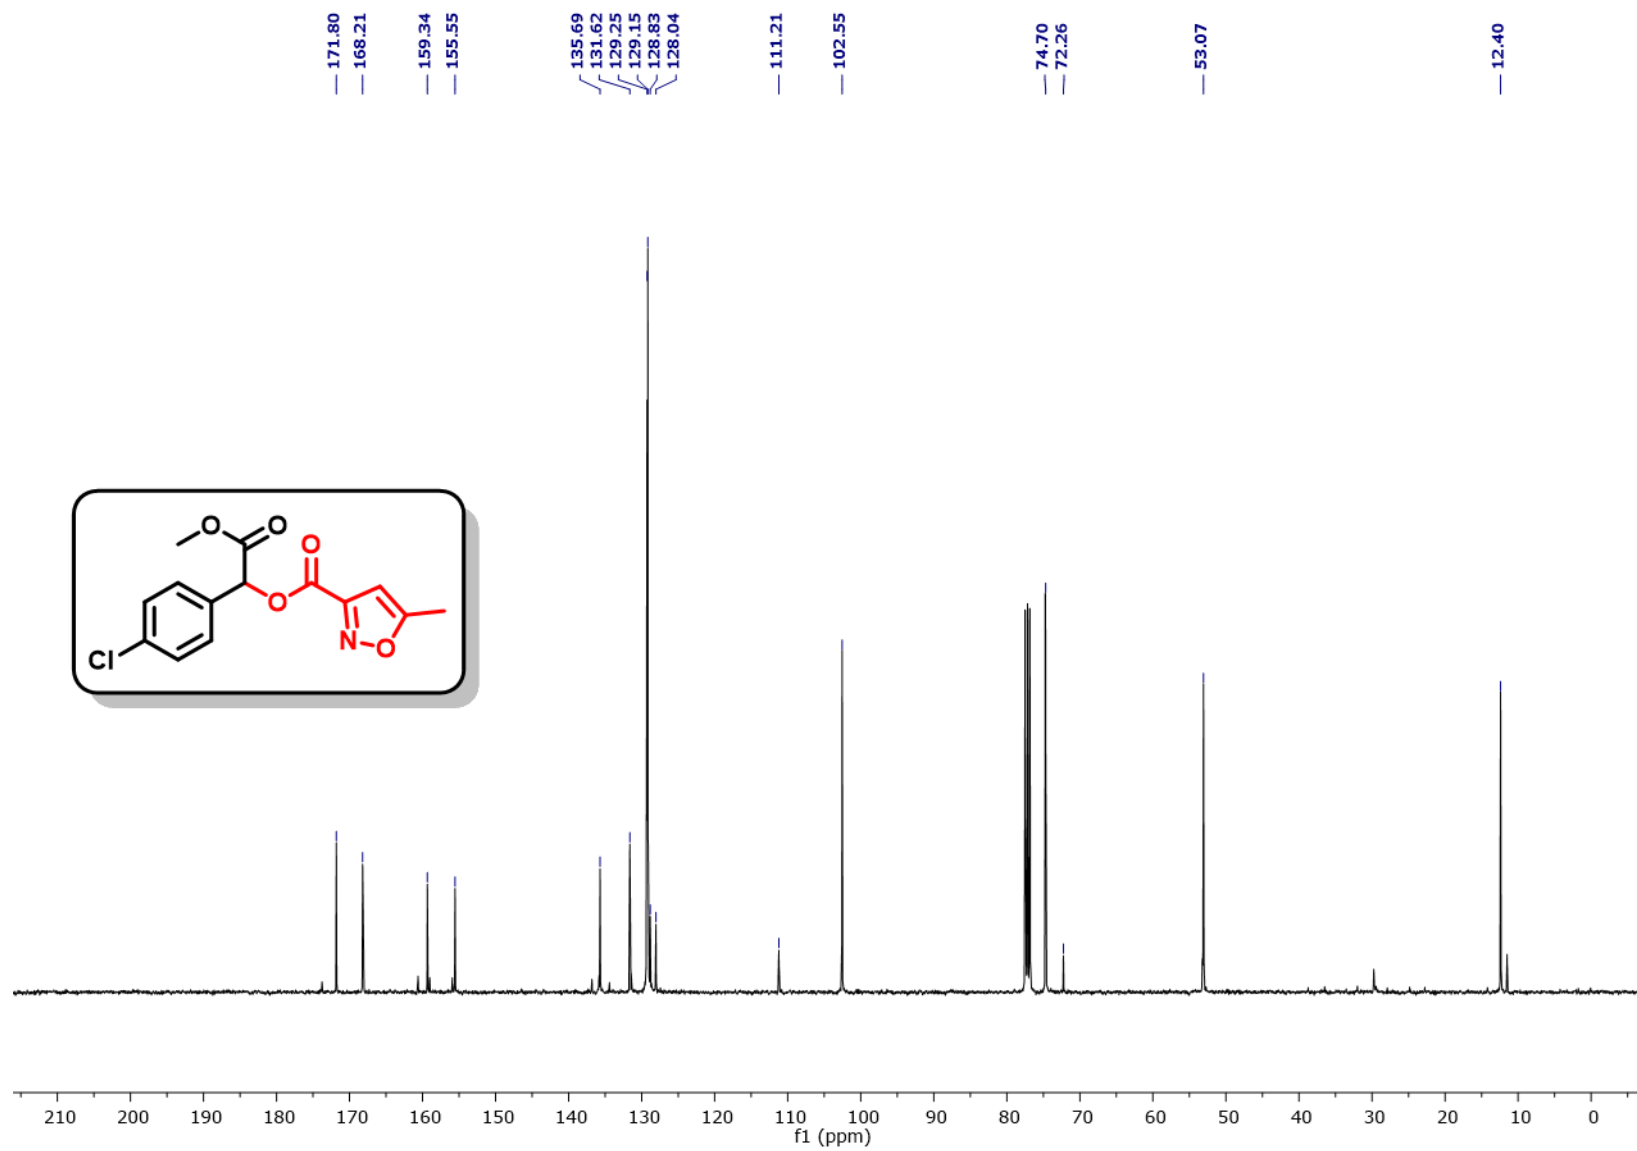

**Fig. S95.** <sup>13</sup>C NMR (101 MHz, CDCl<sub>3</sub>) spectra of 1-(4-chlorophenyl)-2-methoxy-2-oxoethyl 5-methylisoxazole-3-carboxylate (**4m**).



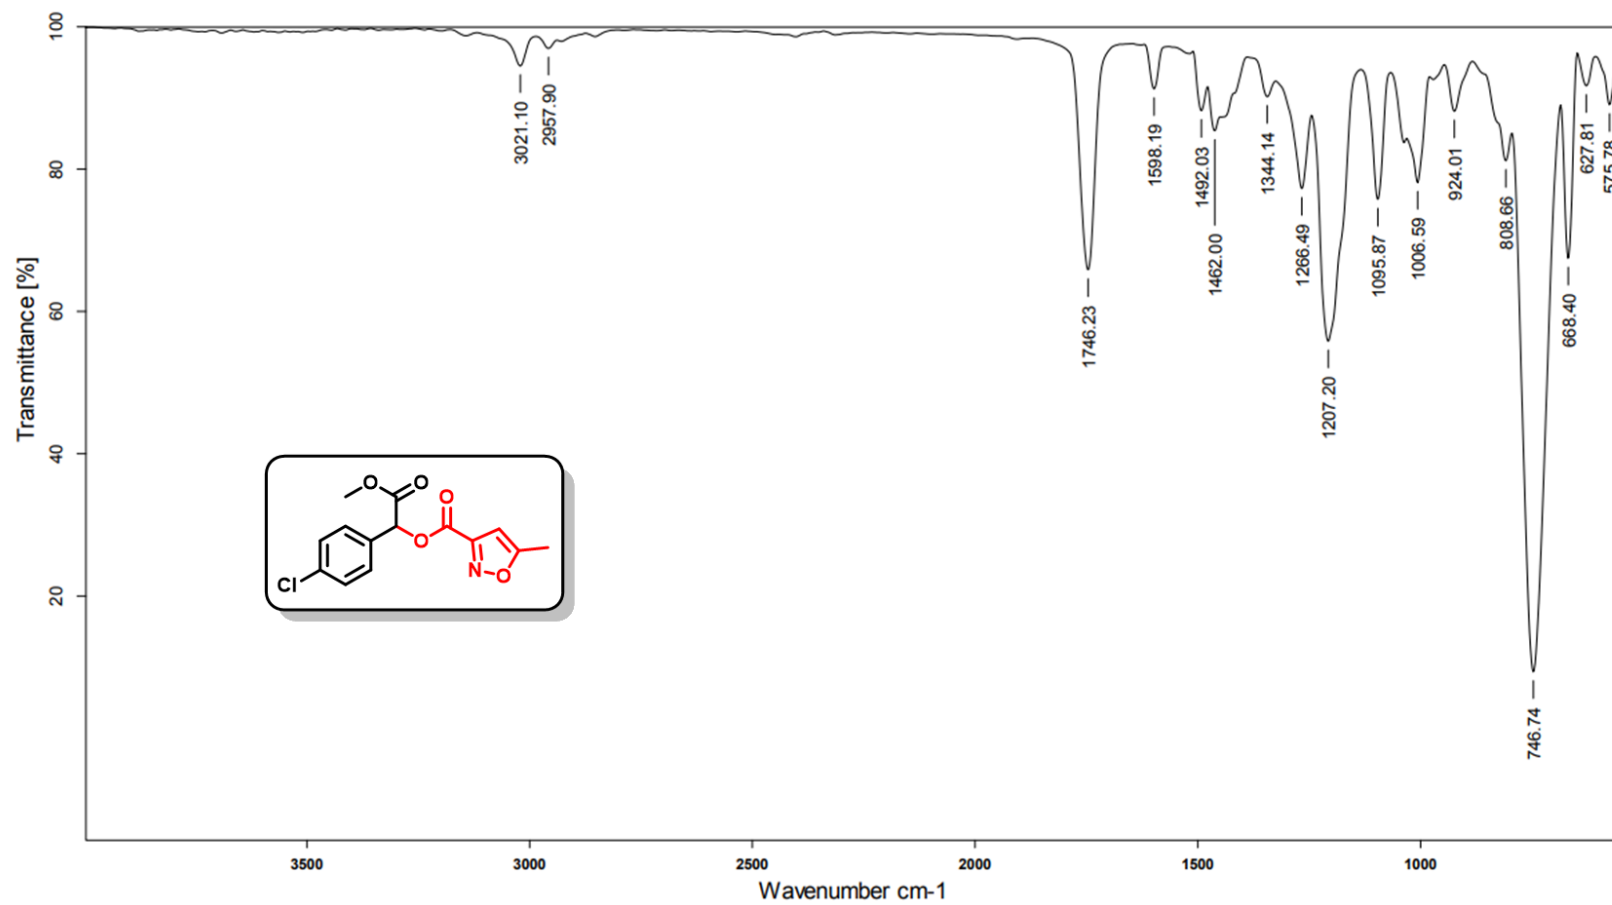

**Fig. S96.** IR spectra of spectra of 1-(4-chlorophenyl)-2-methoxy-2-oxoethyl 5-methylisoxazole-3-carboxylate (**4m**).

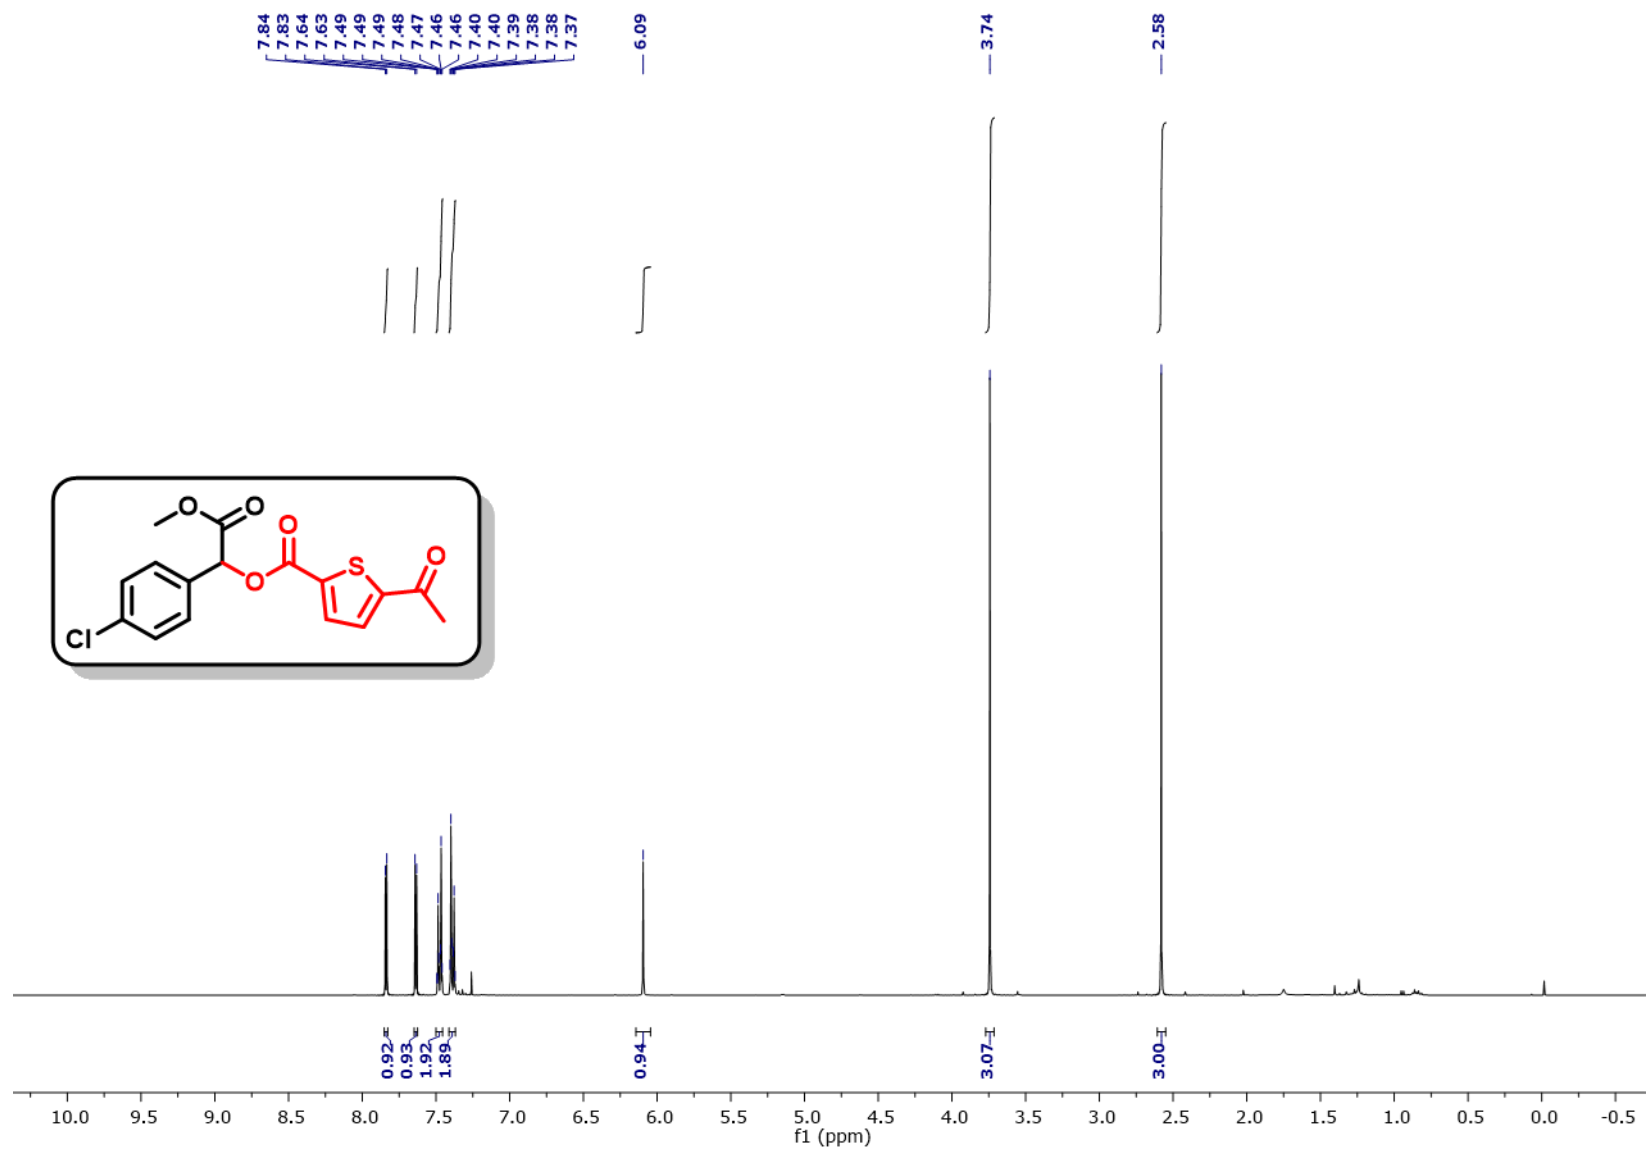

**Fig. S97.** <sup>1</sup>H NMR (400 MHz, CDCl<sub>3</sub>) spectra of 1-(4-chlorophenyl)-2-methoxy-2-oxoethyl 5-acetylthiophene-2-carboxylate (**4n**).

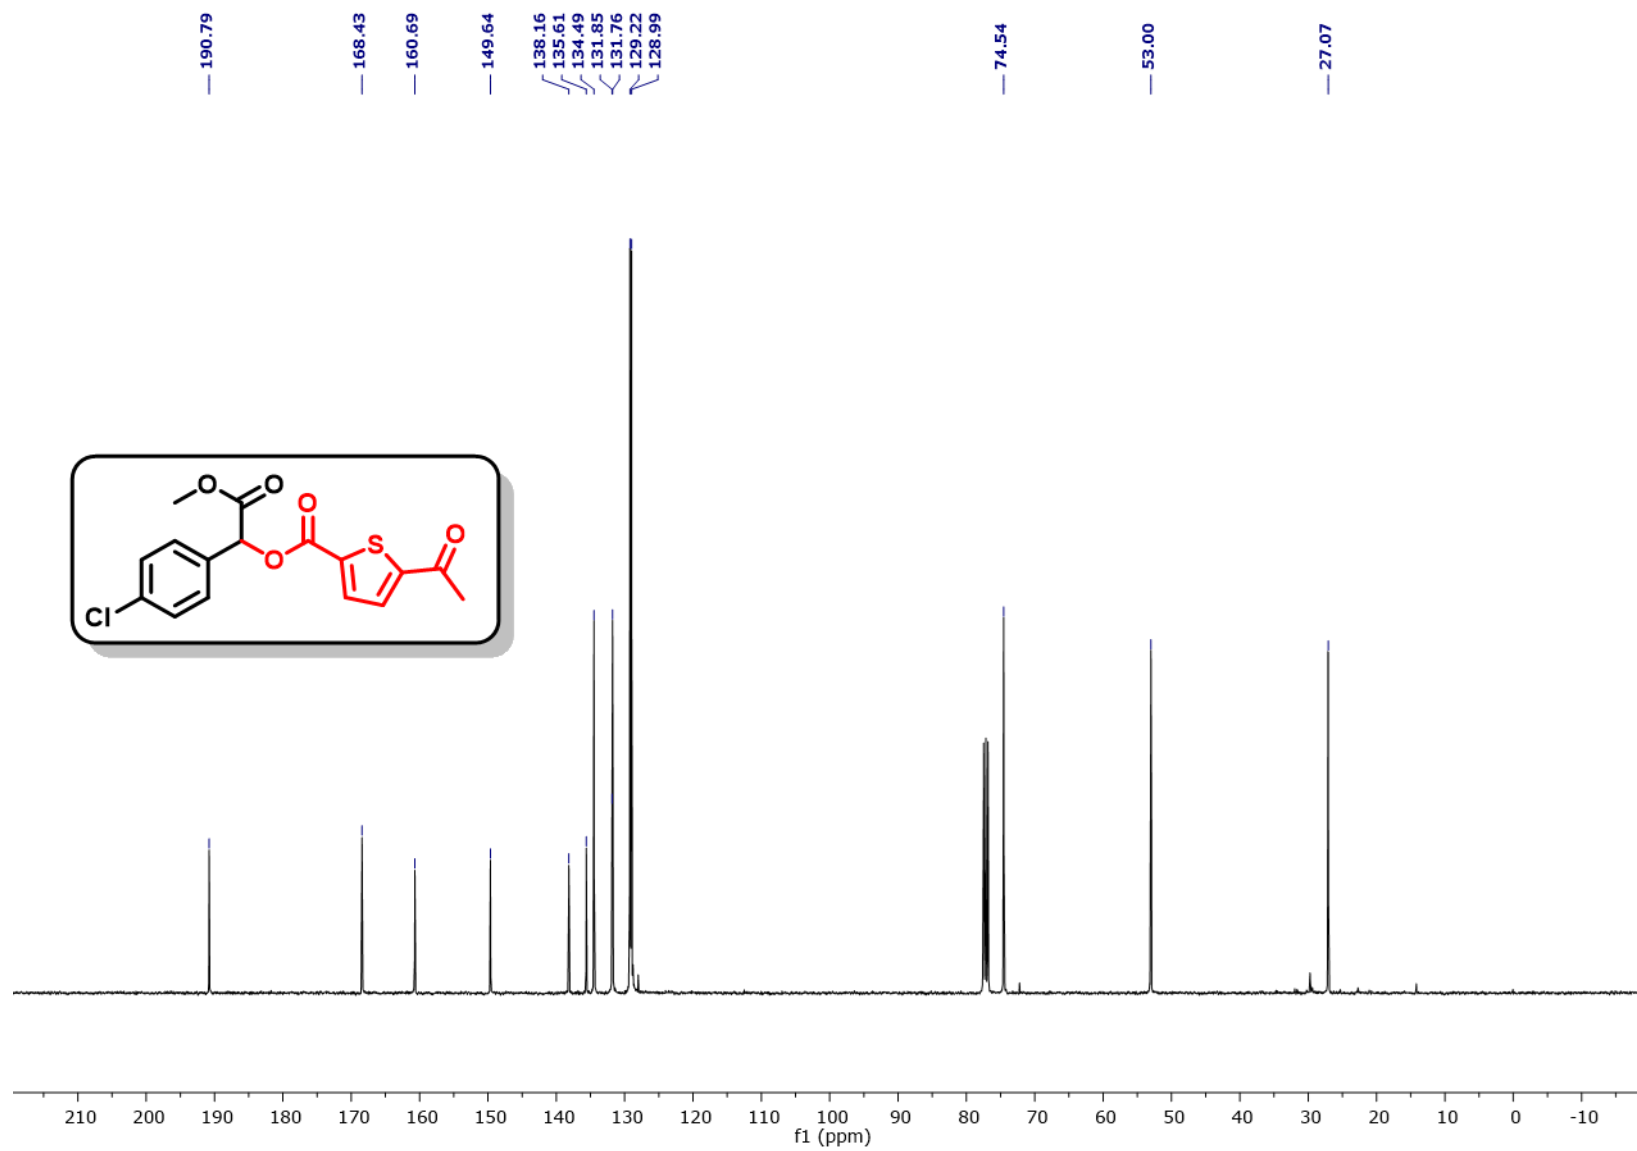

**Fig. S98.**  $^{13}\text{C}$  NMR (101 MHz,  $\text{CDCl}_3$ ) spectra of 1-(4-chlorophenyl)-2-methoxy-2-oxoethyl 5-acetylthiophene-2-carboxylate (**4n**).

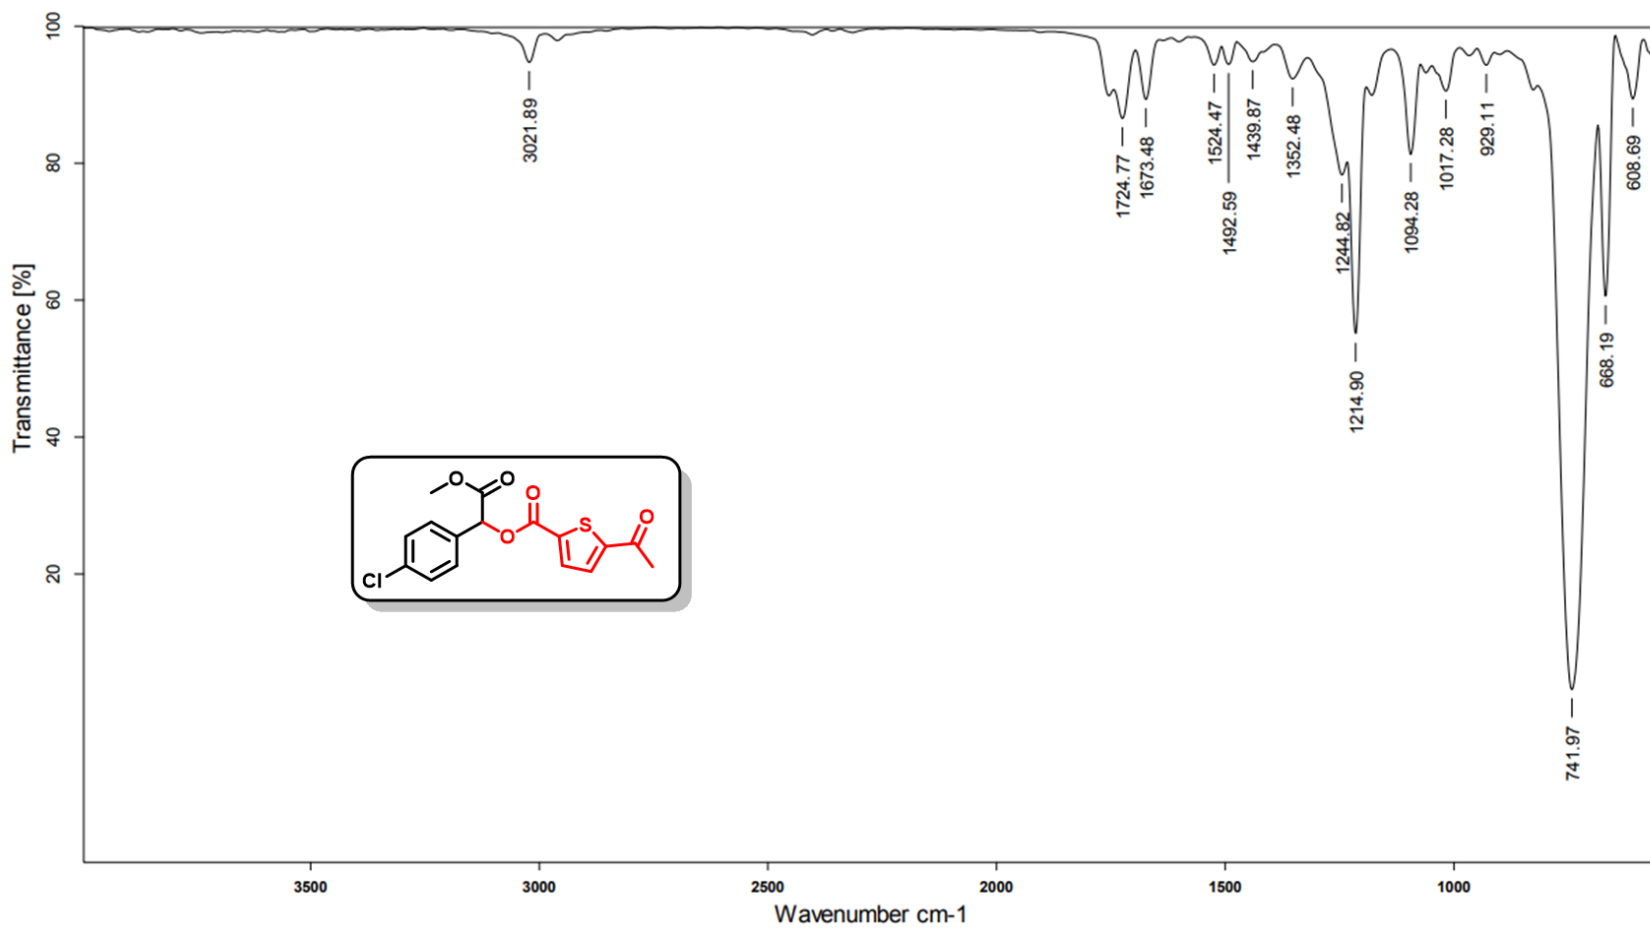

**Fig. S99.** IR spectra of spectra of 1-(4-chlorophenyl)-2-methoxy-2-oxoethyl 5-acetylthiophene-2-carboxylate (**4n**).

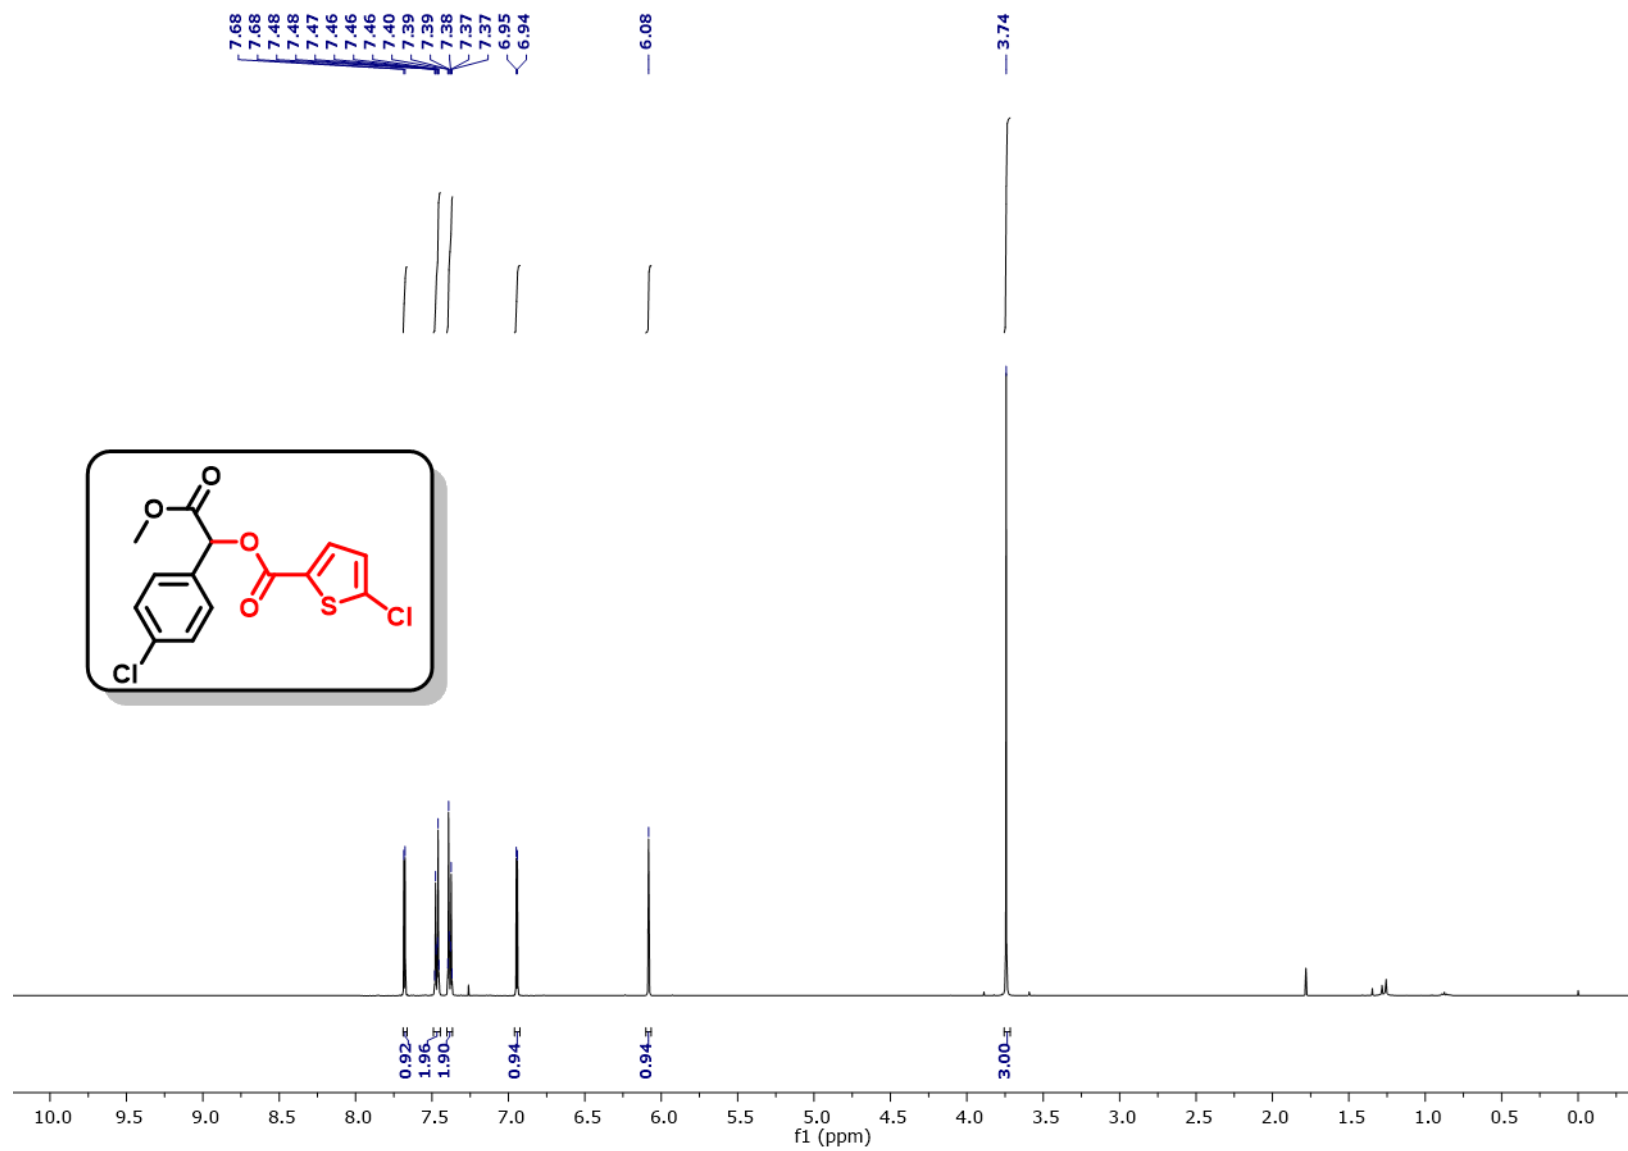

**Fig. S100.** <sup>1</sup>H NMR (500 MHz, CDCl<sub>3</sub>) spectra of 1-(4-chlorophenyl)-2-methoxy-2-oxoethyl 5-chlorothiophene-2-carboxylate (**40**).

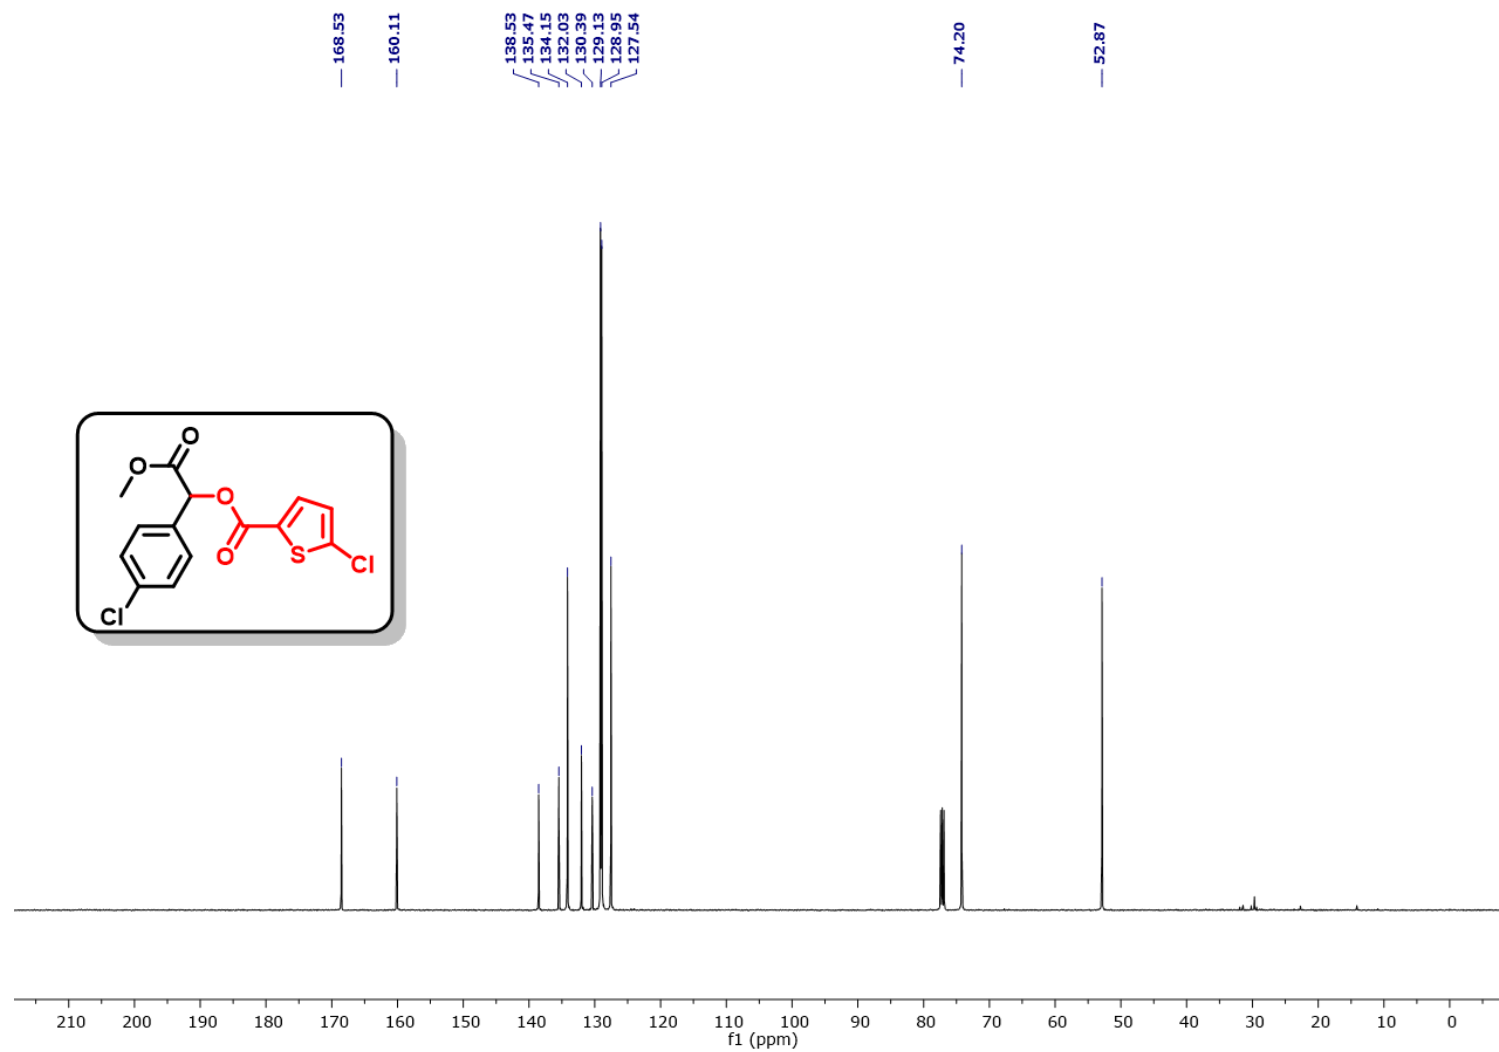

**Fig. S101.** <sup>13</sup>C NMR (126 MHz, CDCl<sub>3</sub>) spectra of 1-(4-chlorophenyl)-2-methoxy-2-oxoethyl 5-chlorothiophene-2-carboxylate (**4o**).

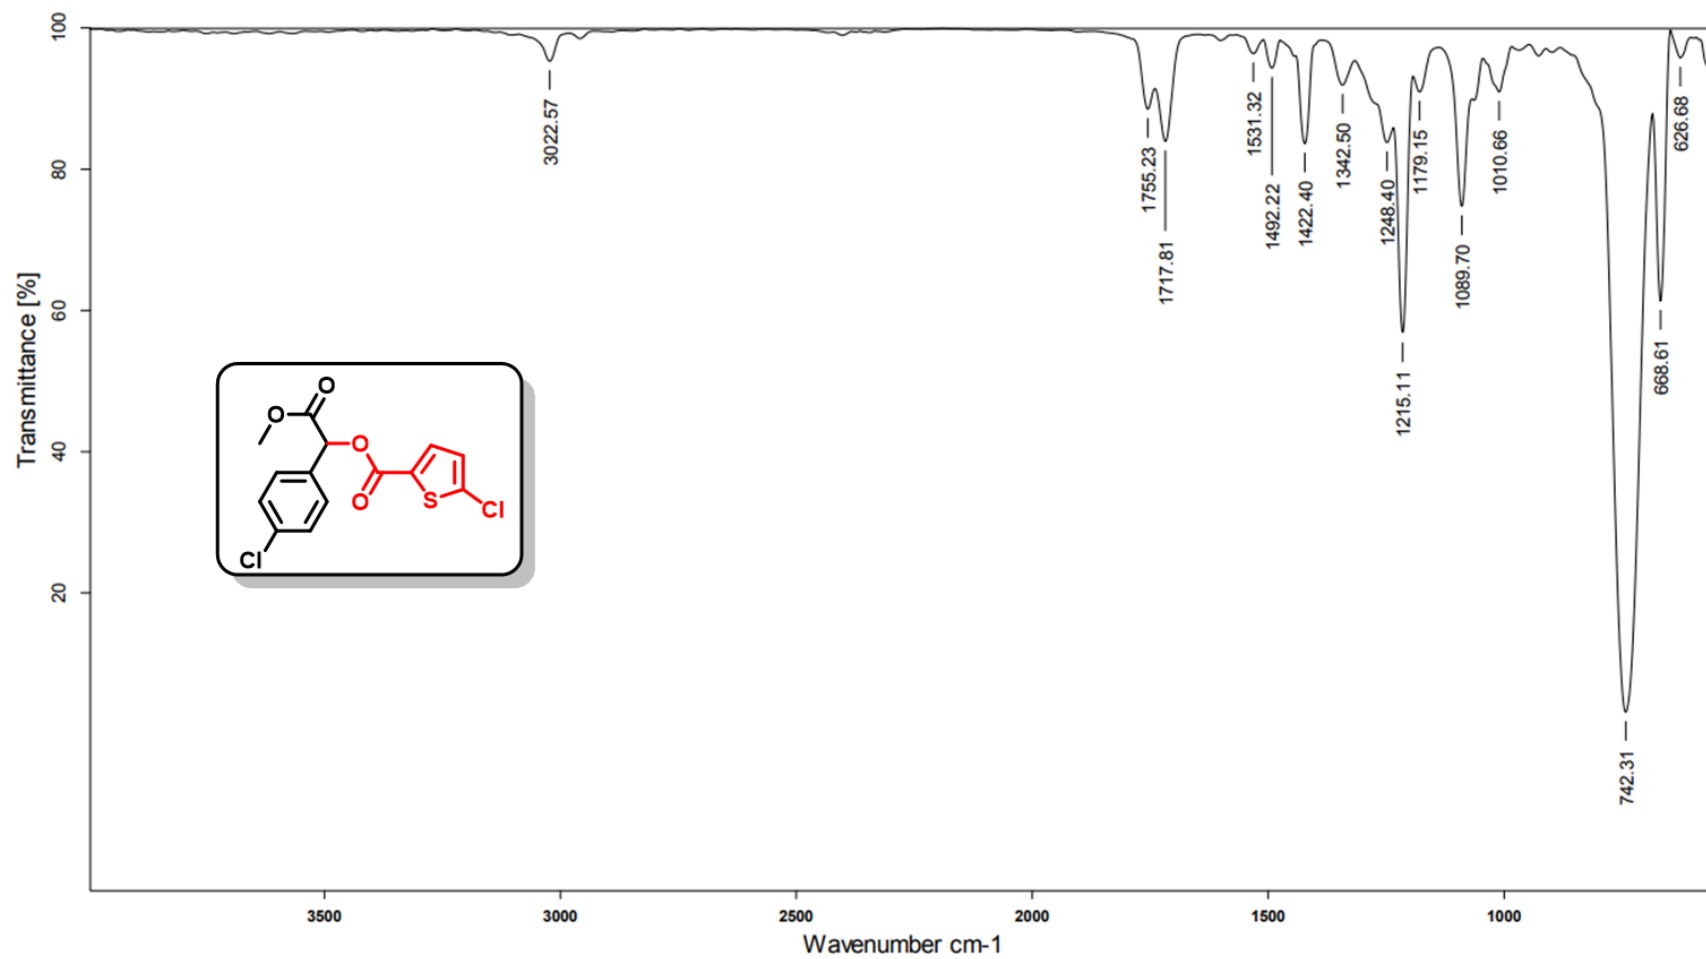

**Fig. S102.** IR spectra of spectra of 1-(4-chlorophenyl)-2-methoxy-2-oxoethyl 5-chlorothiophene-2-carboxylate (**4o**).

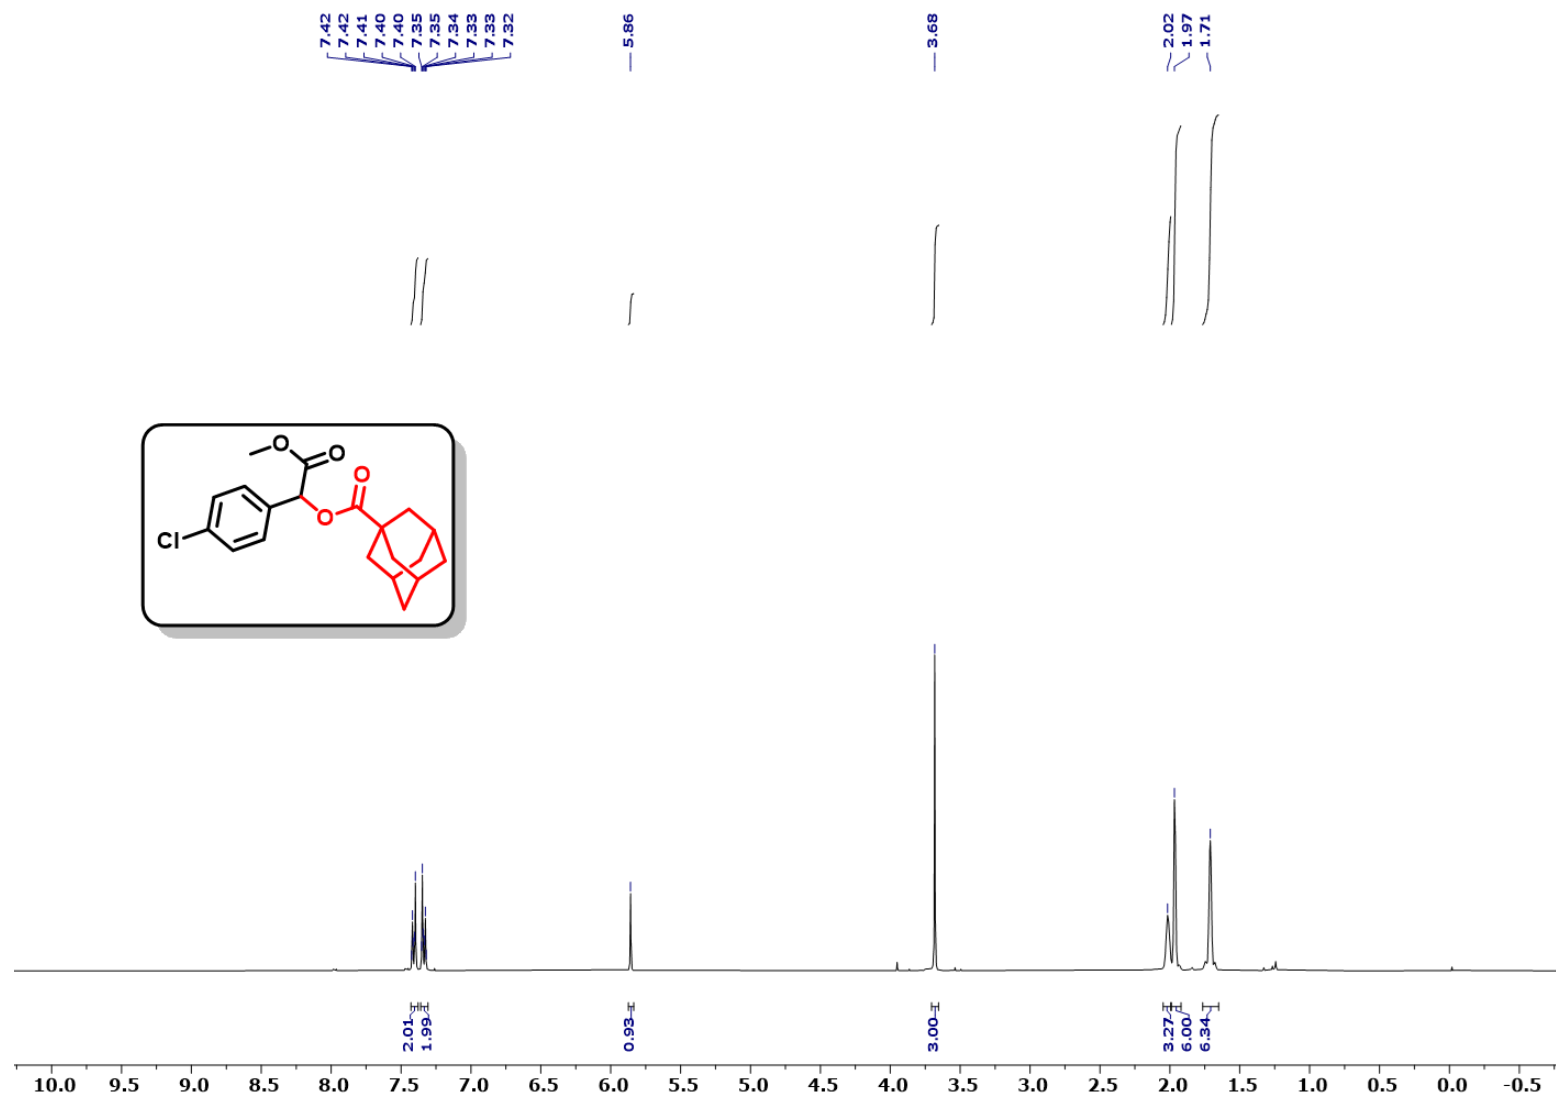

**Fig. S103.** <sup>1</sup>H NMR (400 MHz, CDCl<sub>3</sub>) spectra of 1-(4-chlorophenyl)-2-methoxy-2-oxoethyl (1s,3s)-adamantane-1-carboxylate (**4p**).



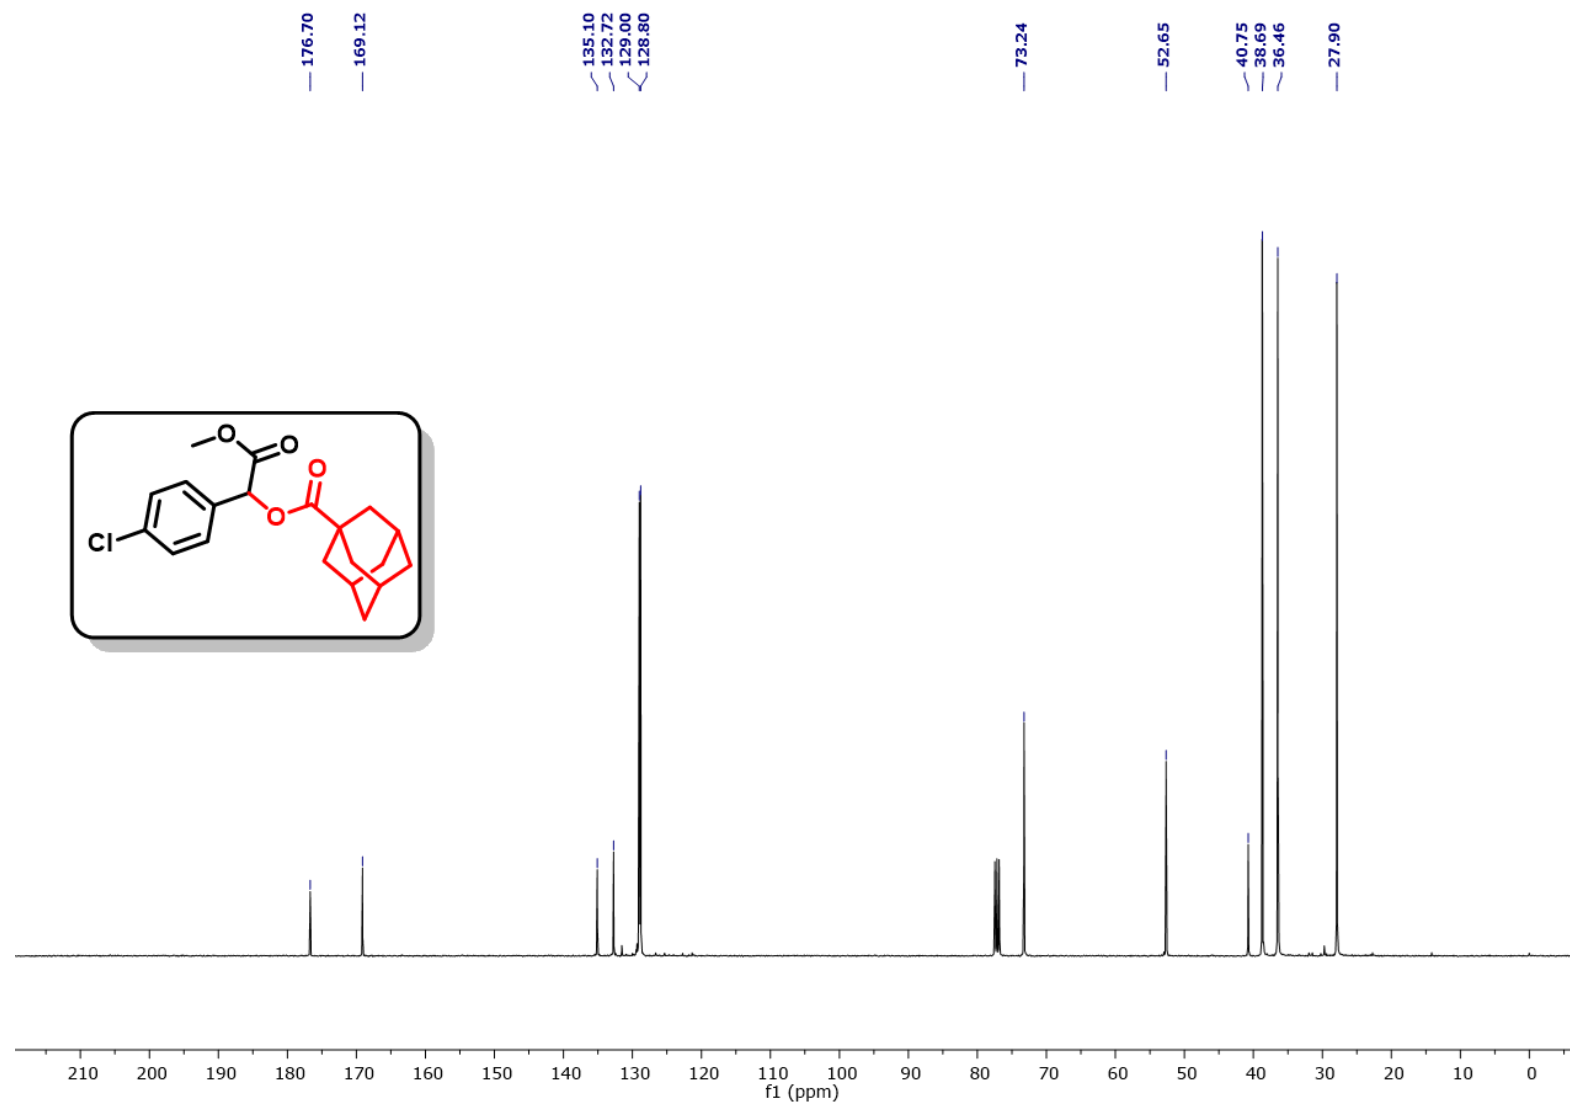

**Fig. S104.** <sup>13</sup>C NMR (101 MHz, CDCl<sub>3</sub>) spectra of 1-(4-chlorophenyl)-2-methoxy-2-oxoethyl (1s,3s)-adamantane-1-carboxylate (**4p**).

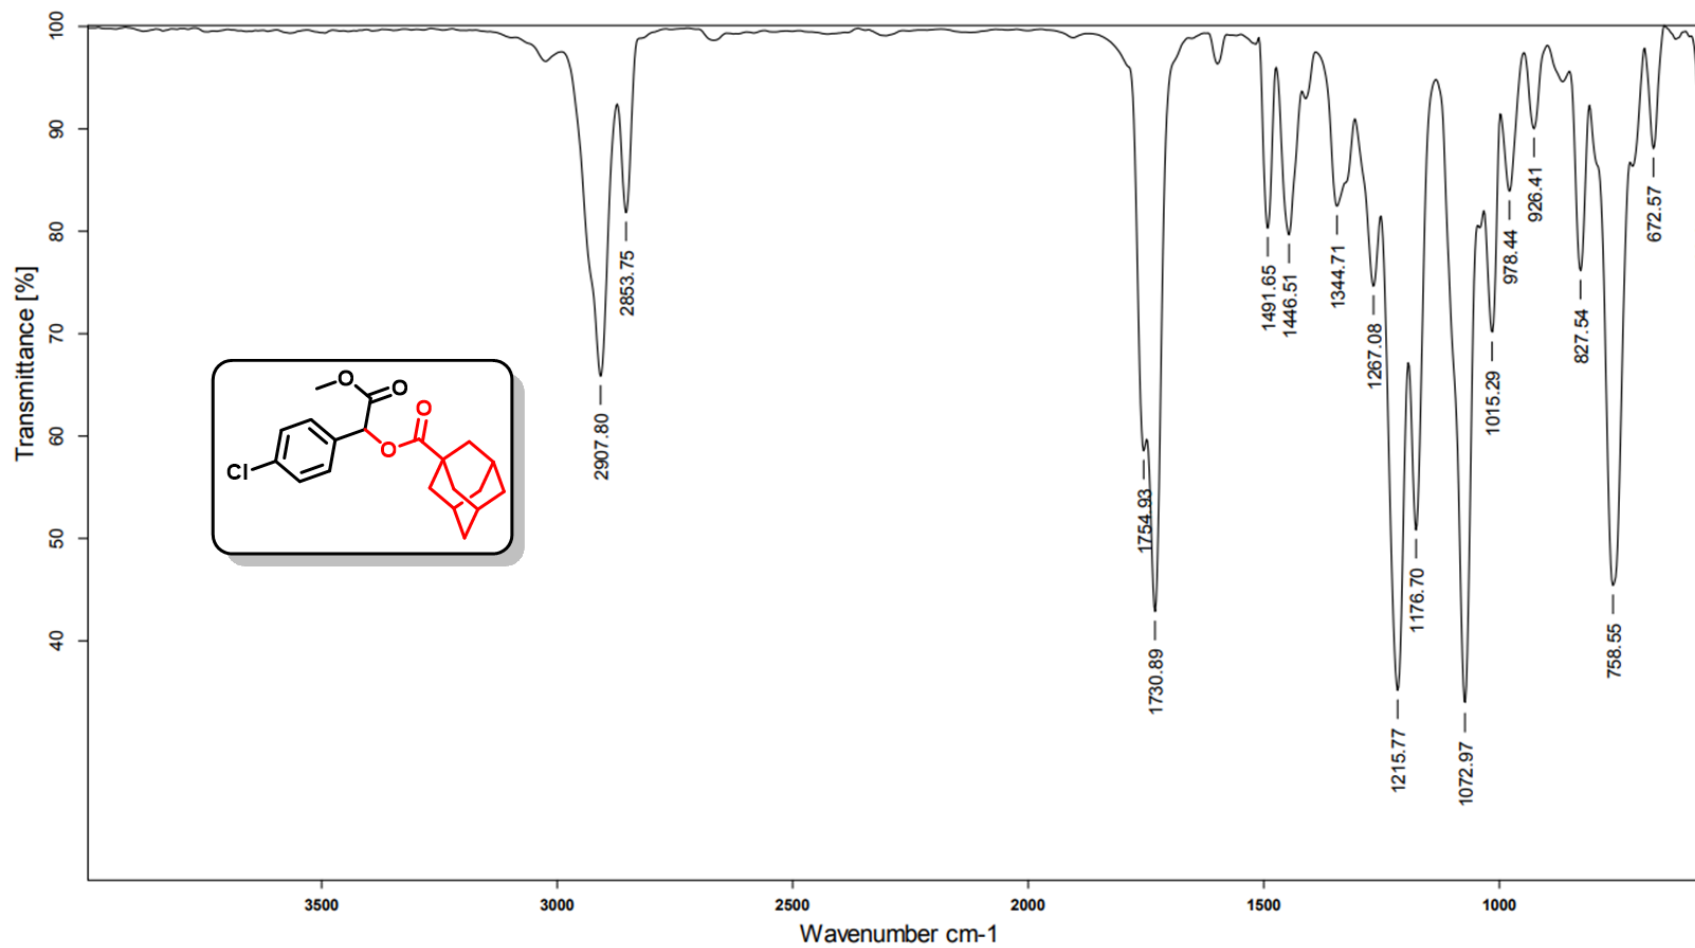

**Fig. S105.** IR spectra of spectra of 1-(4-chlorophenyl)-2-methoxy-2-oxoethyl (1s,3s)-adamantane-1-carboxylate (**4p**).

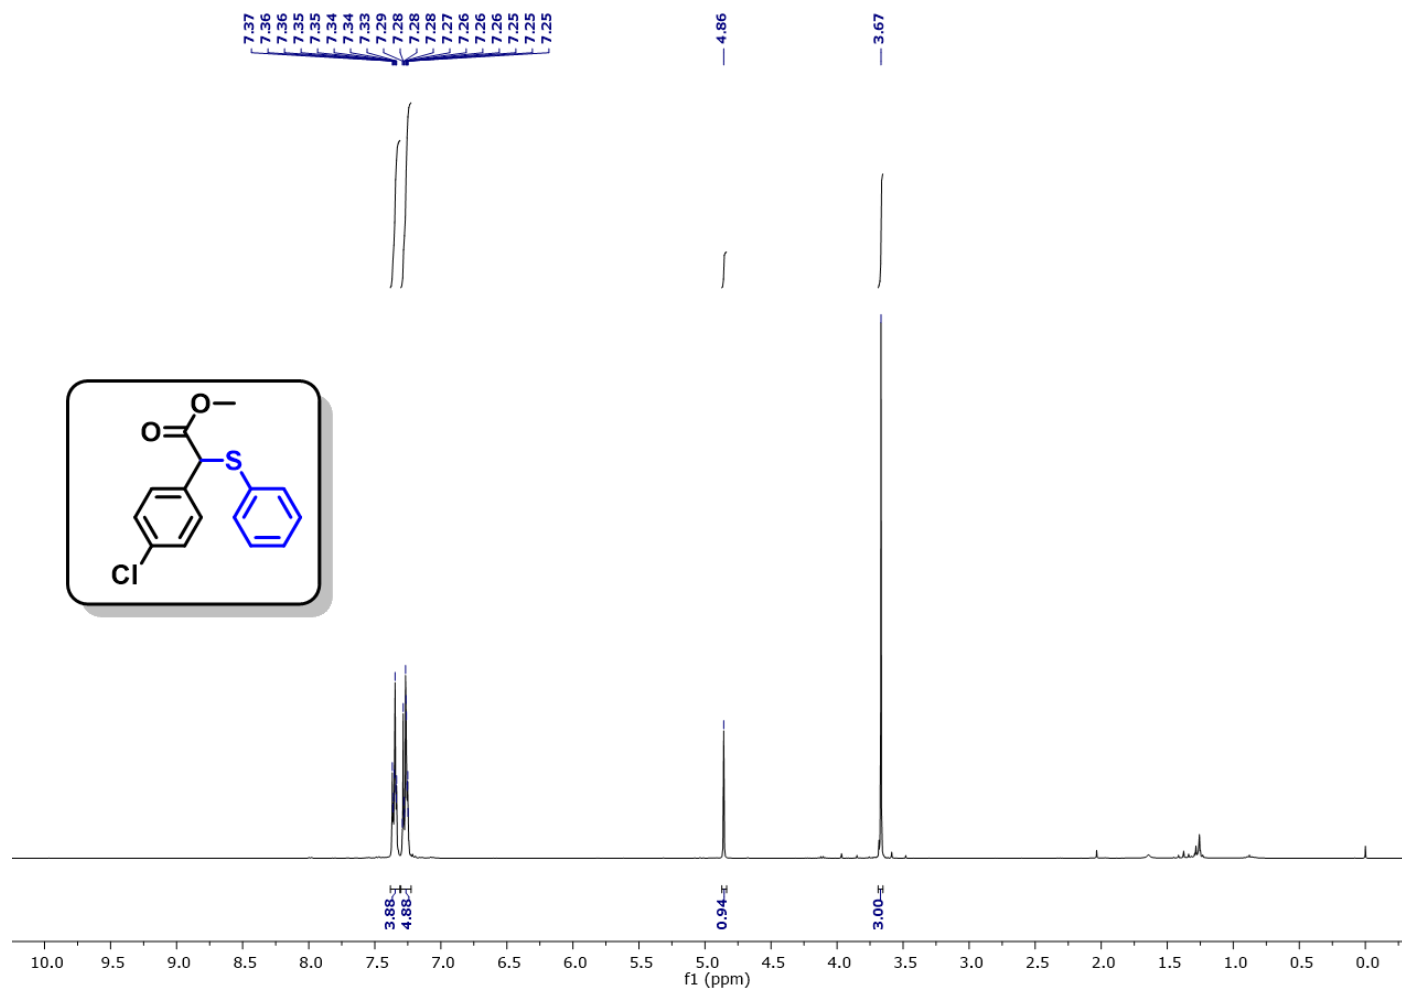

**Fig. S106.** <sup>1</sup>H NMR (400 MHz, CDCl<sub>3</sub>) spectra of methyl 2-(4-chlorophenyl)-2-(phenylthio)acetate (**6a**).

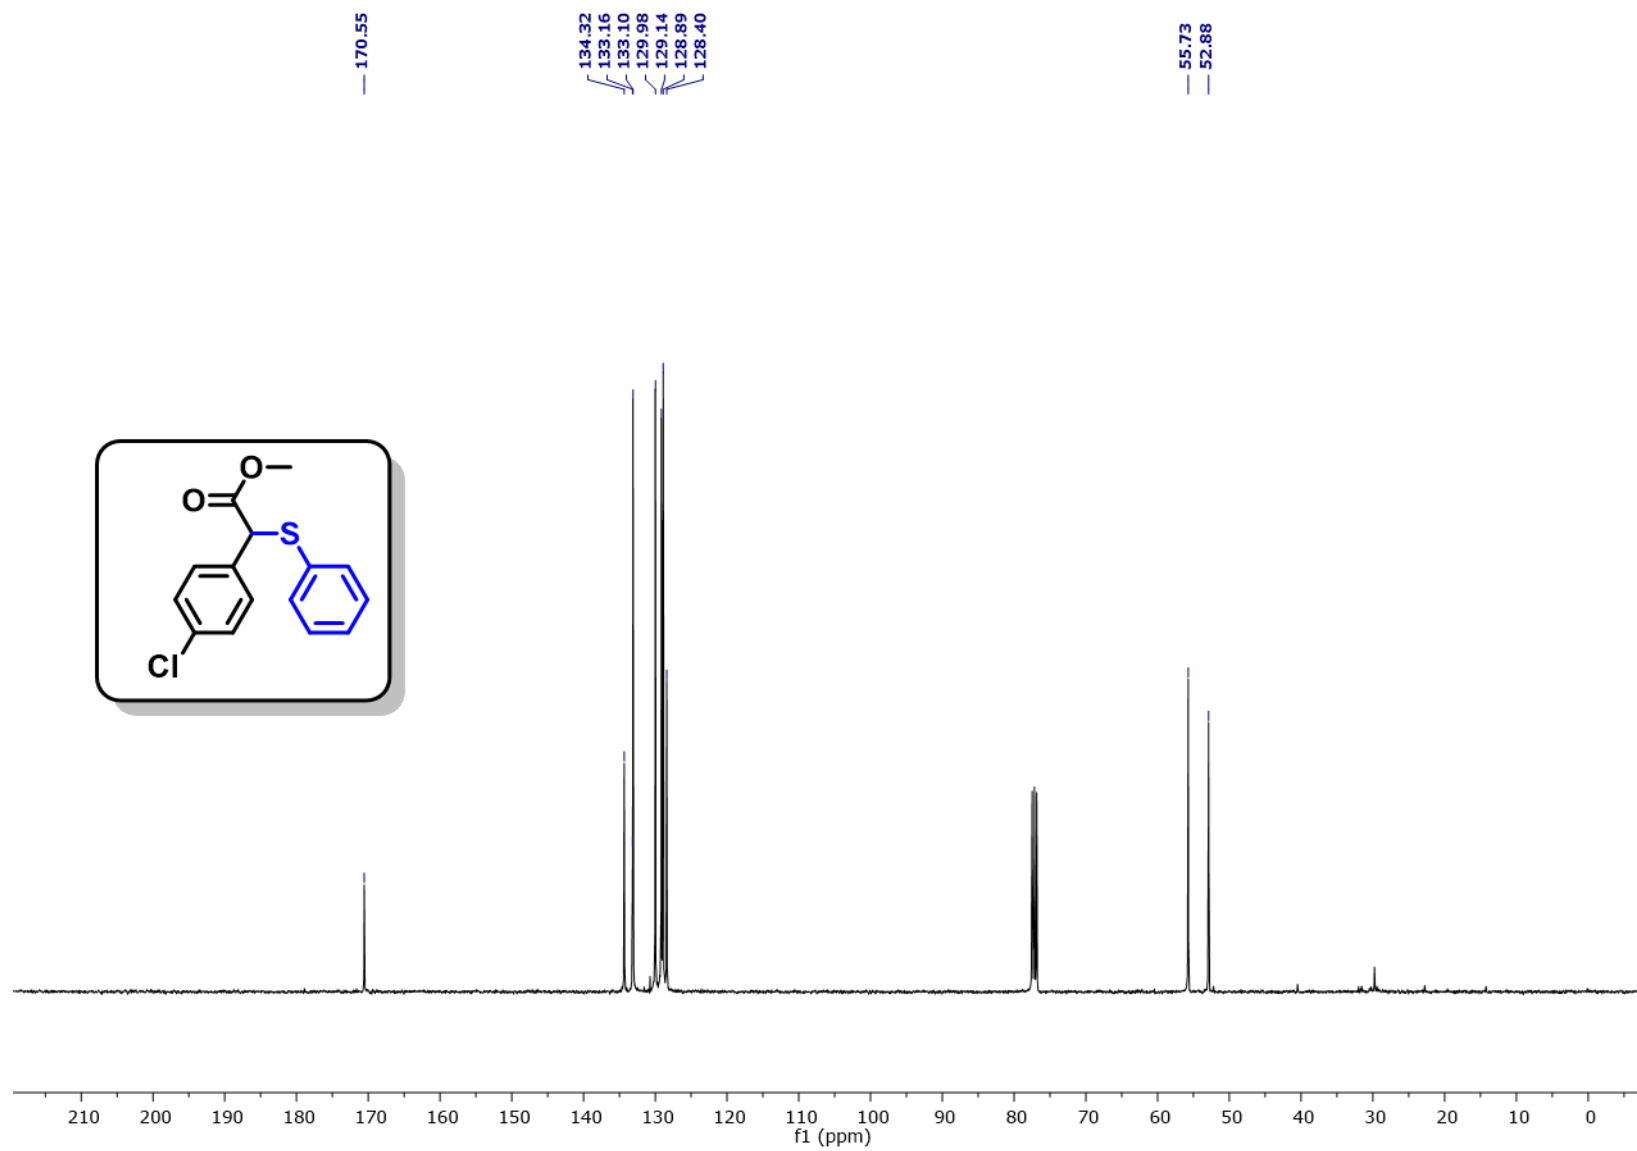

**Fig. S107.**  $^{13}\text{C}$  NMR (101 MHz,  $\text{CDCl}_3$ ) spectra of methyl 2-(4-chlorophenyl)-2-(phenylthio)acetate (**6a**).

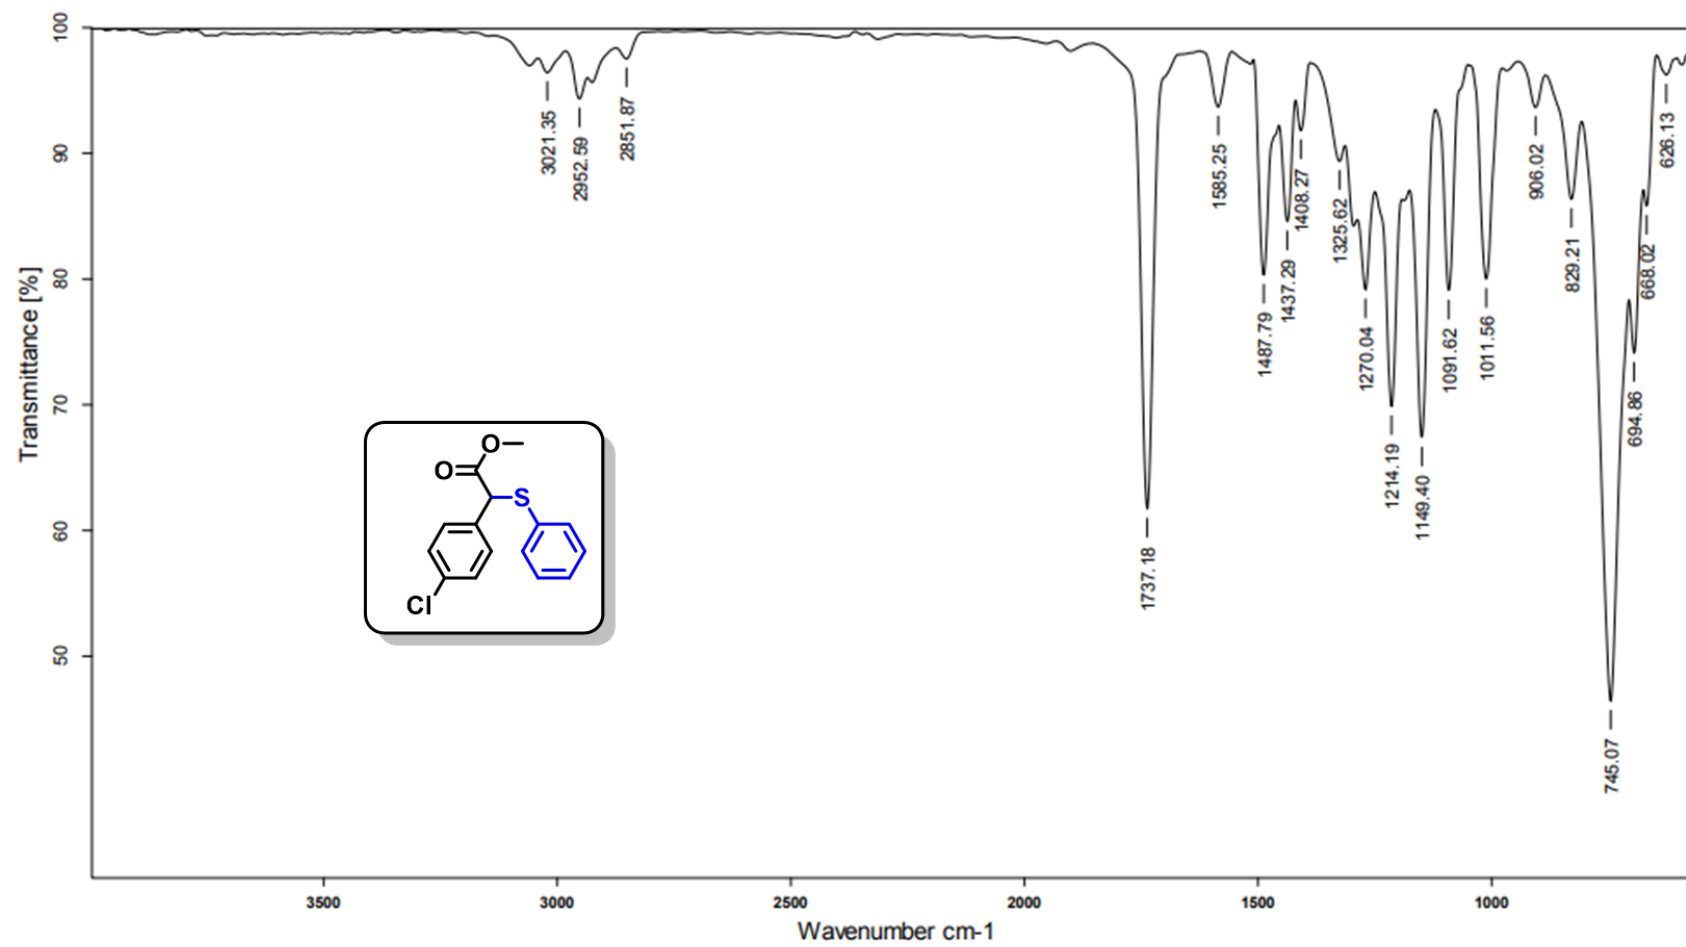

**Fig. S108.** IR spectra of spectra of methyl 2-(4-chlorophenyl)-2-(phenylthio)acetate (**6a**).

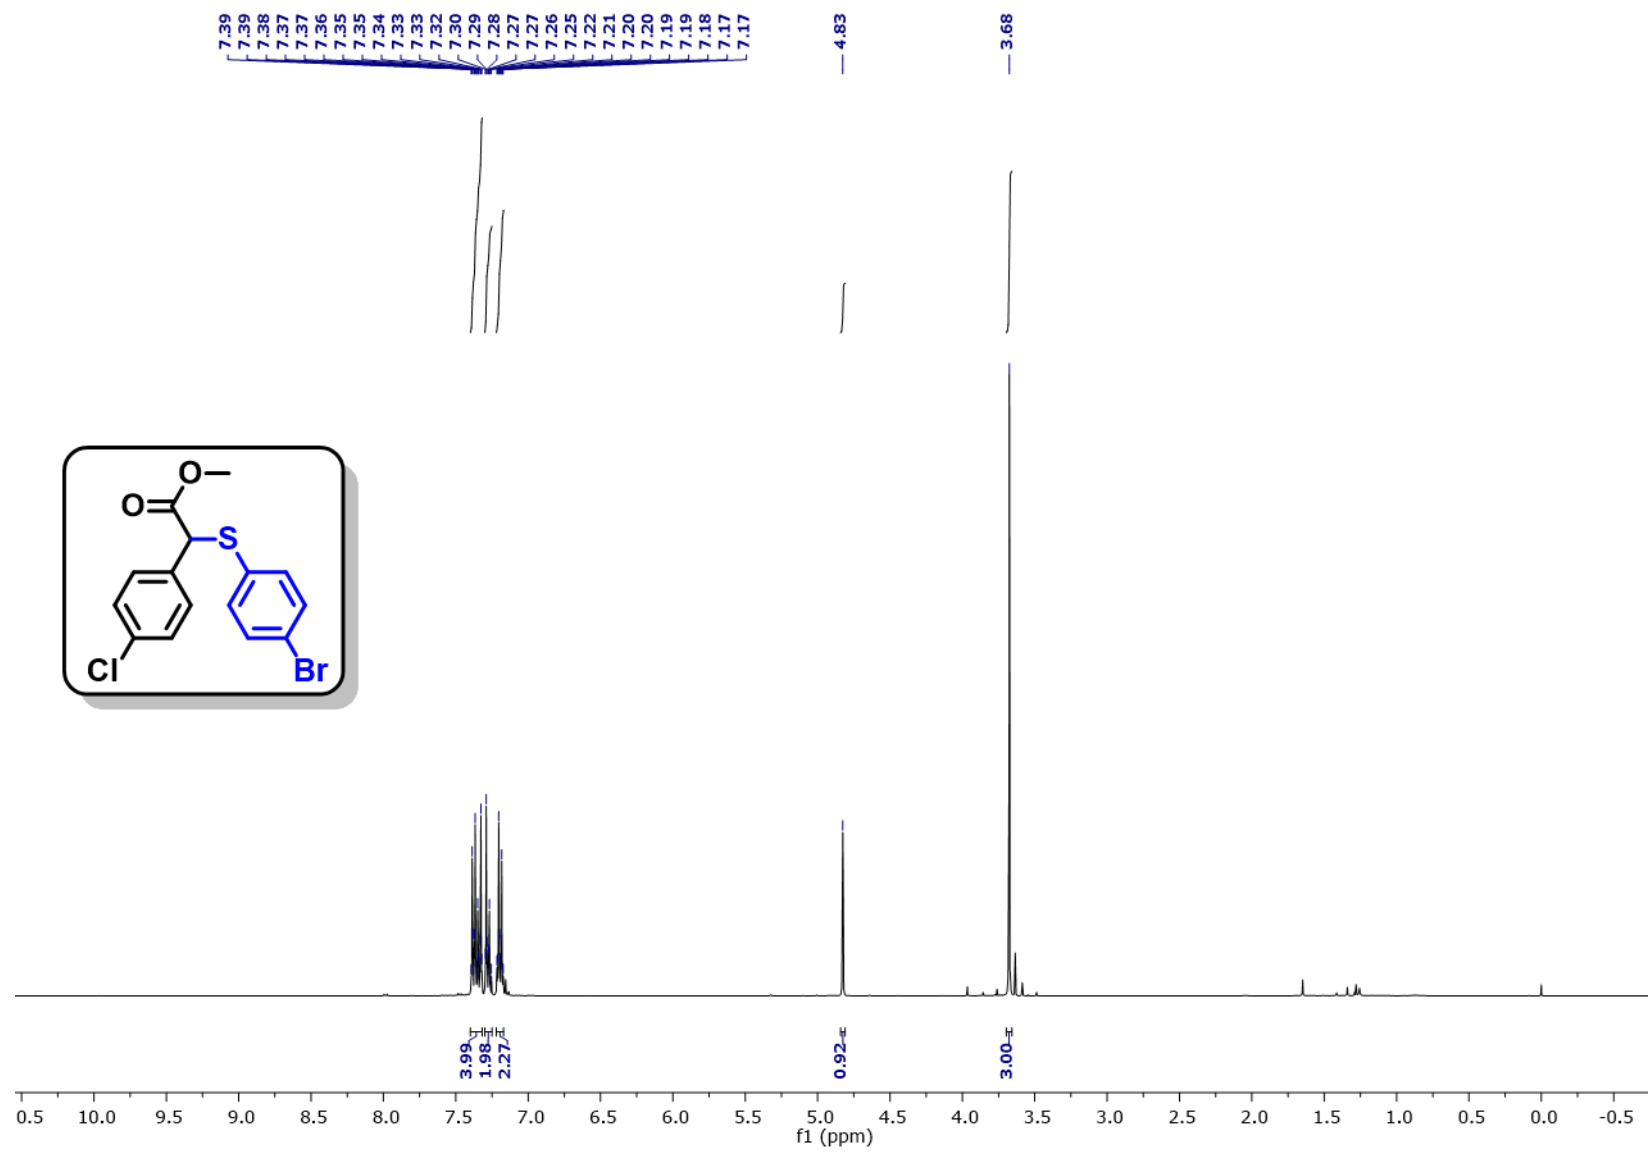

**Fig. S109.** <sup>1</sup>H NMR (400 MHz, CDCl<sub>3</sub>) spectra of methyl 2-((4-bromophenyl)thio)-2-(4-chlorophenyl)acetate (**6b**).

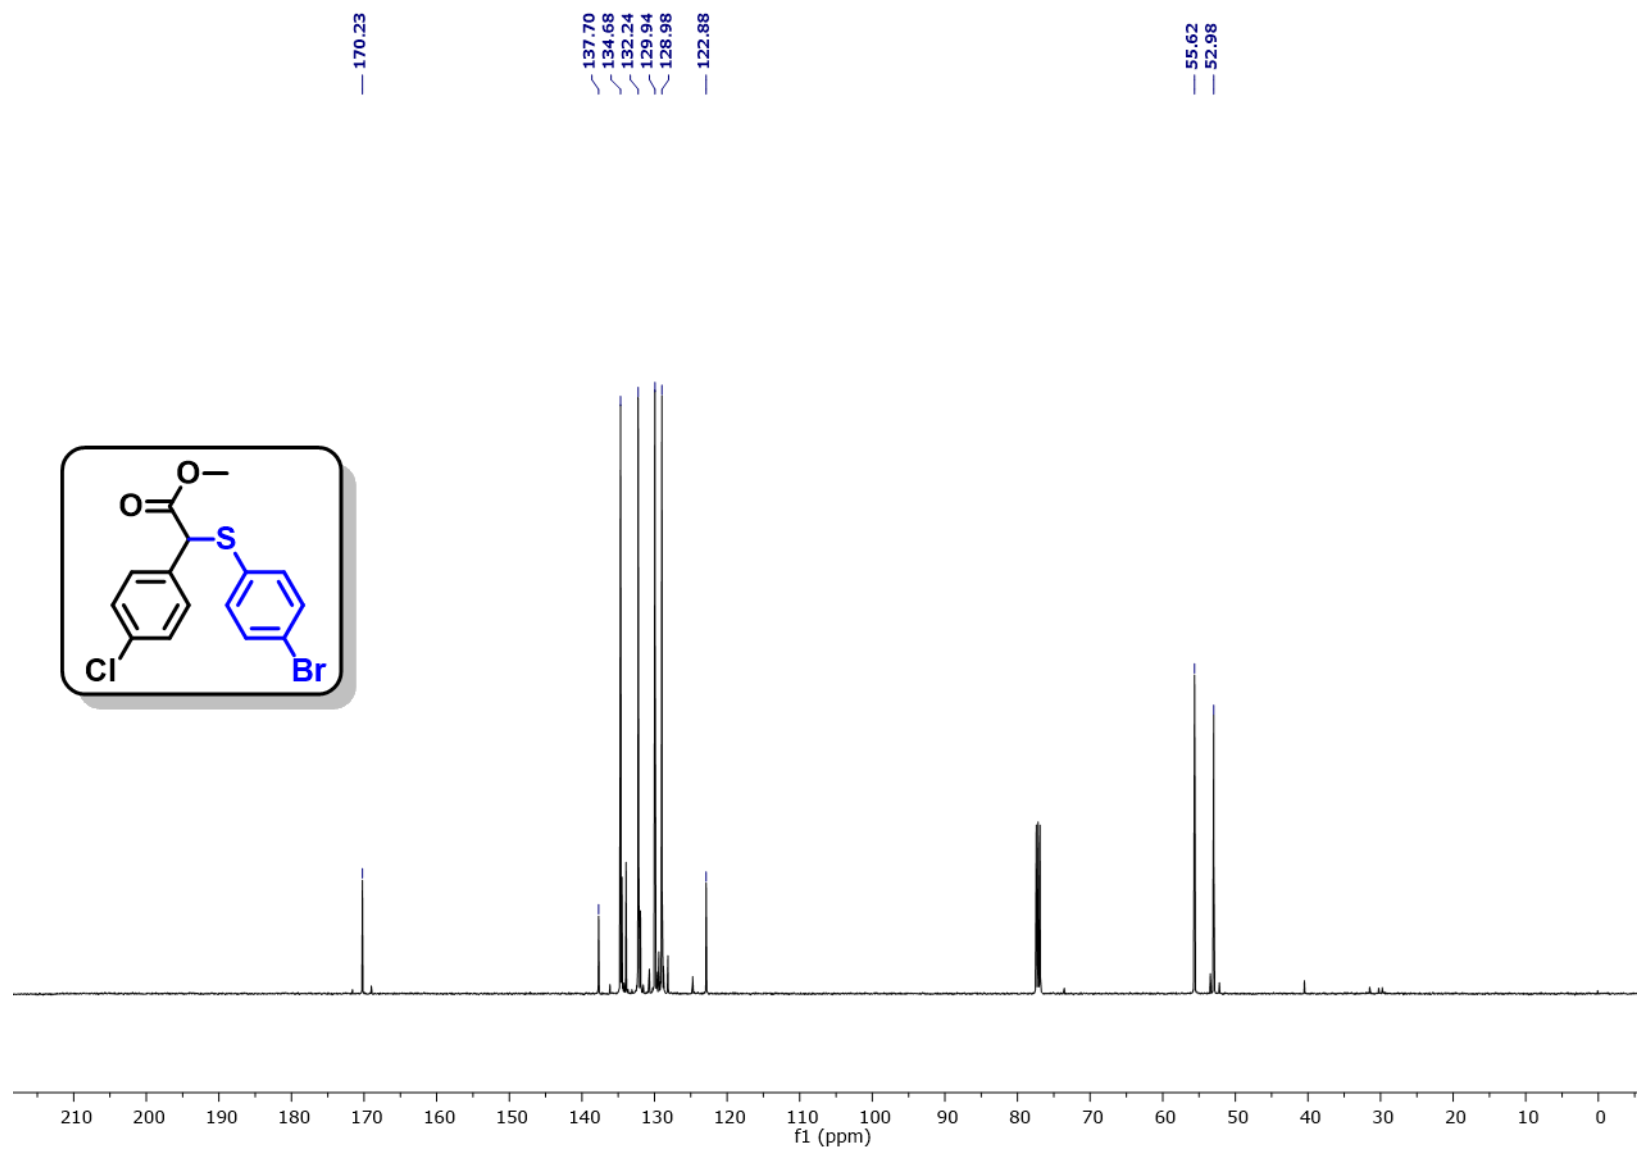

**Fig. S110.** <sup>13</sup>C NMR (126 MHz, CDCl<sub>3</sub>) spectra of methyl 2-((4-bromophenyl)thio)-2-(4-chlorophenyl)acetate (**6b**).

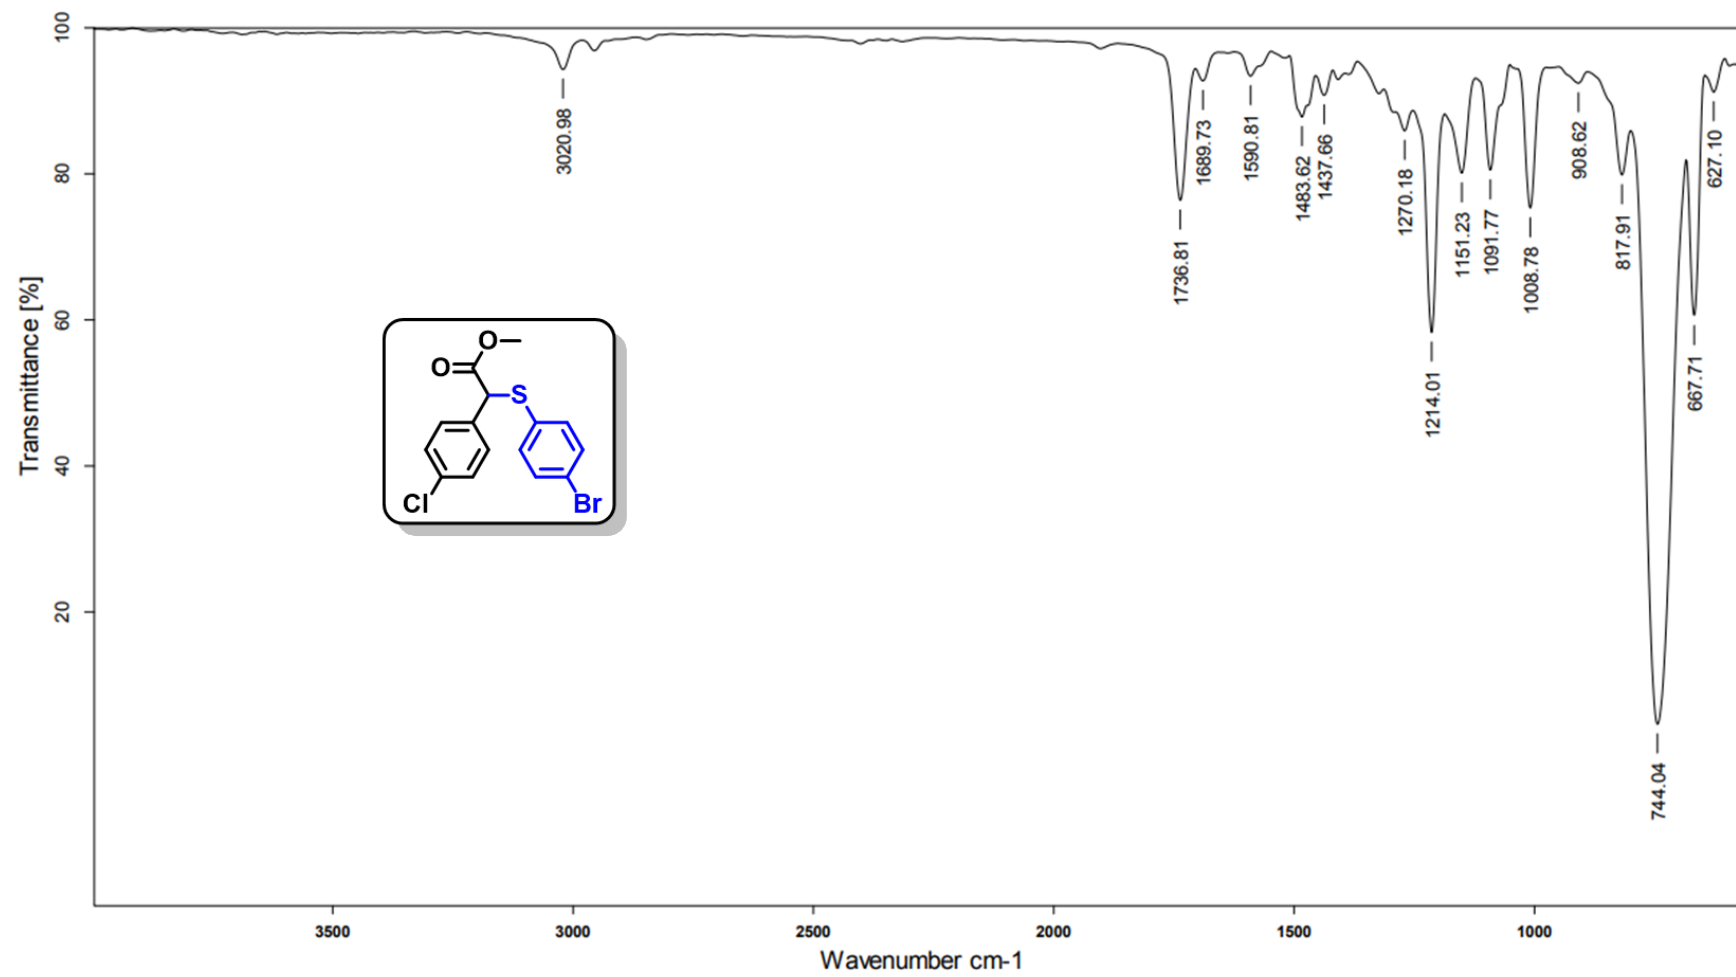

**Fig. S111.** IR spectra of spectra of methyl 2-((4-bromophenyl)thio)-2-(4-chlorophenyl)acetate (**6b**).



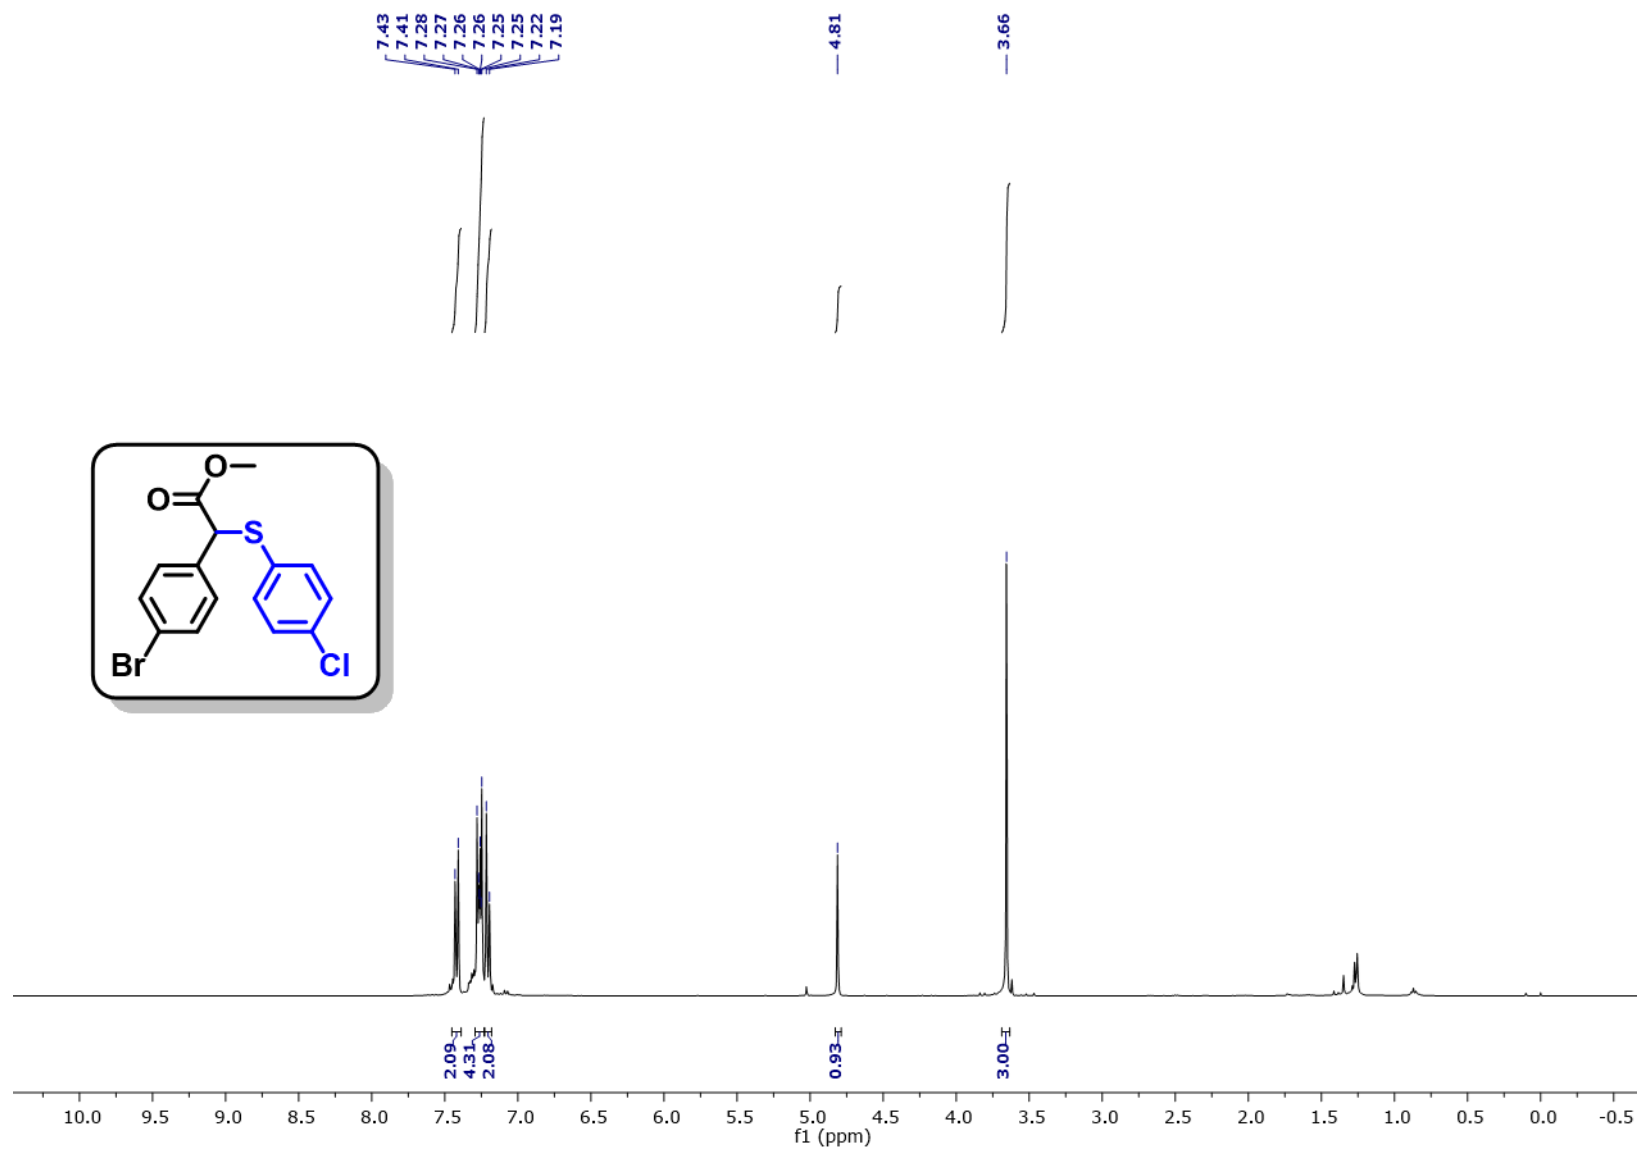

**Fig. S112.** <sup>1</sup>H NMR (400 MHz, CDCl<sub>3</sub>) spectra of methyl 2-(4-bromophenyl)-2-((4-chlorophenyl)thio)acetate (**6c**).

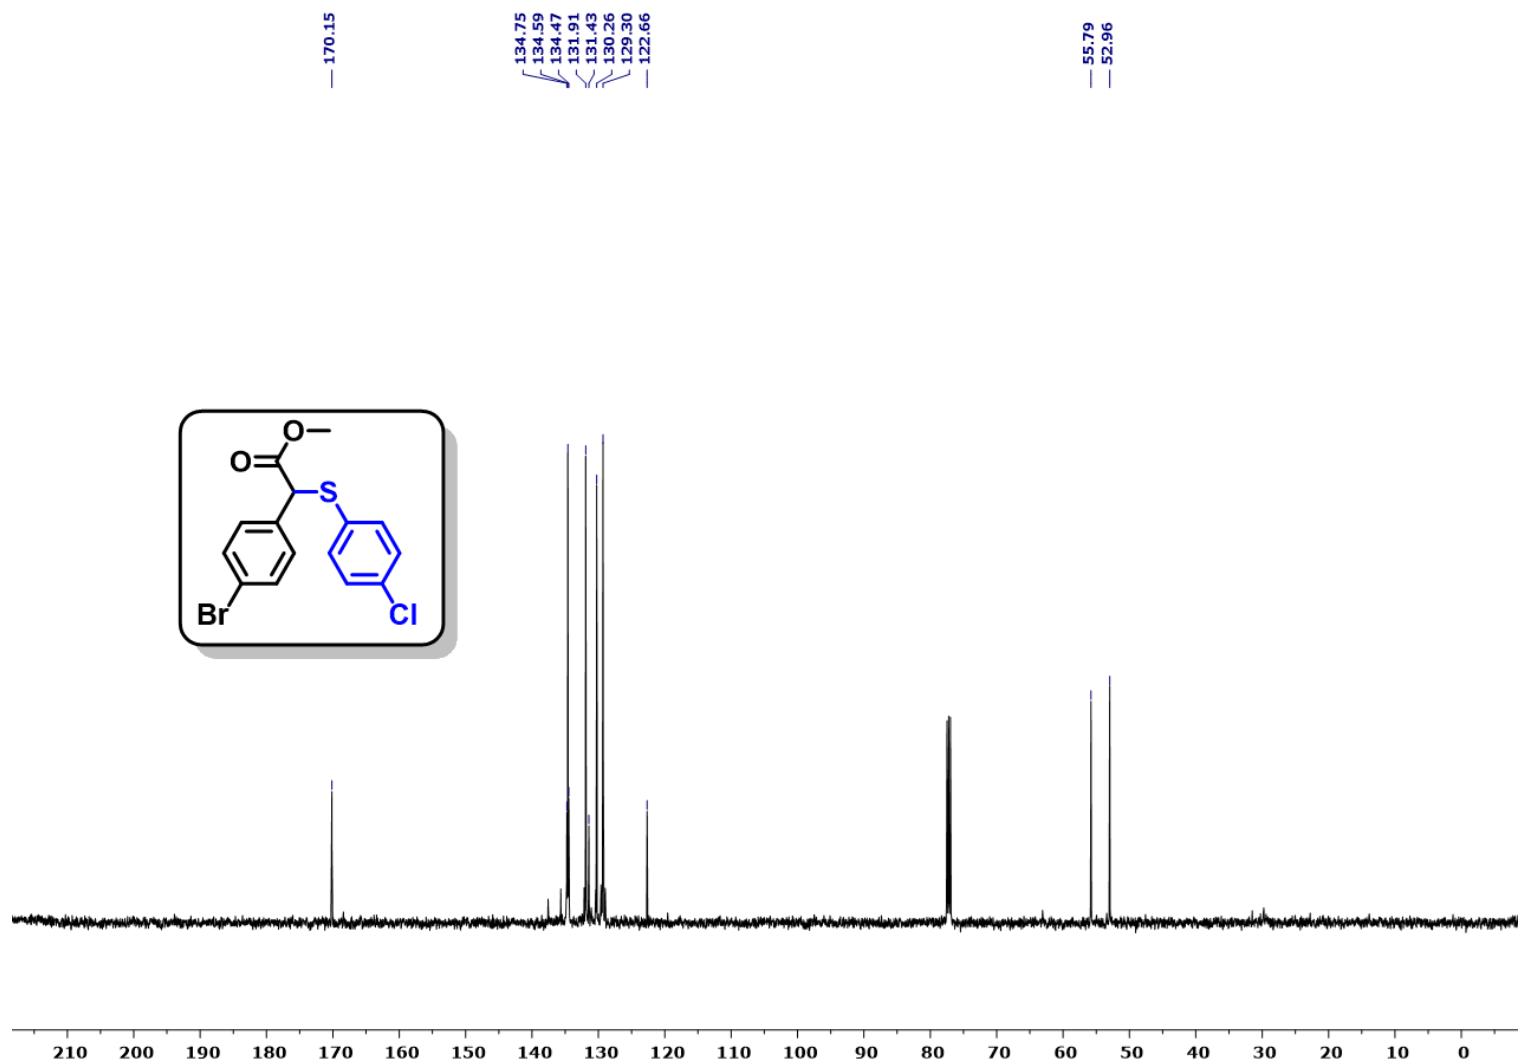

**Fig. S113.** <sup>13</sup>C NMR (126 MHz, CDCl<sub>3</sub>) spectra of methyl 2-(4-bromophenyl)-2-((4-chlorophenyl)thio)acetate (**6c**).

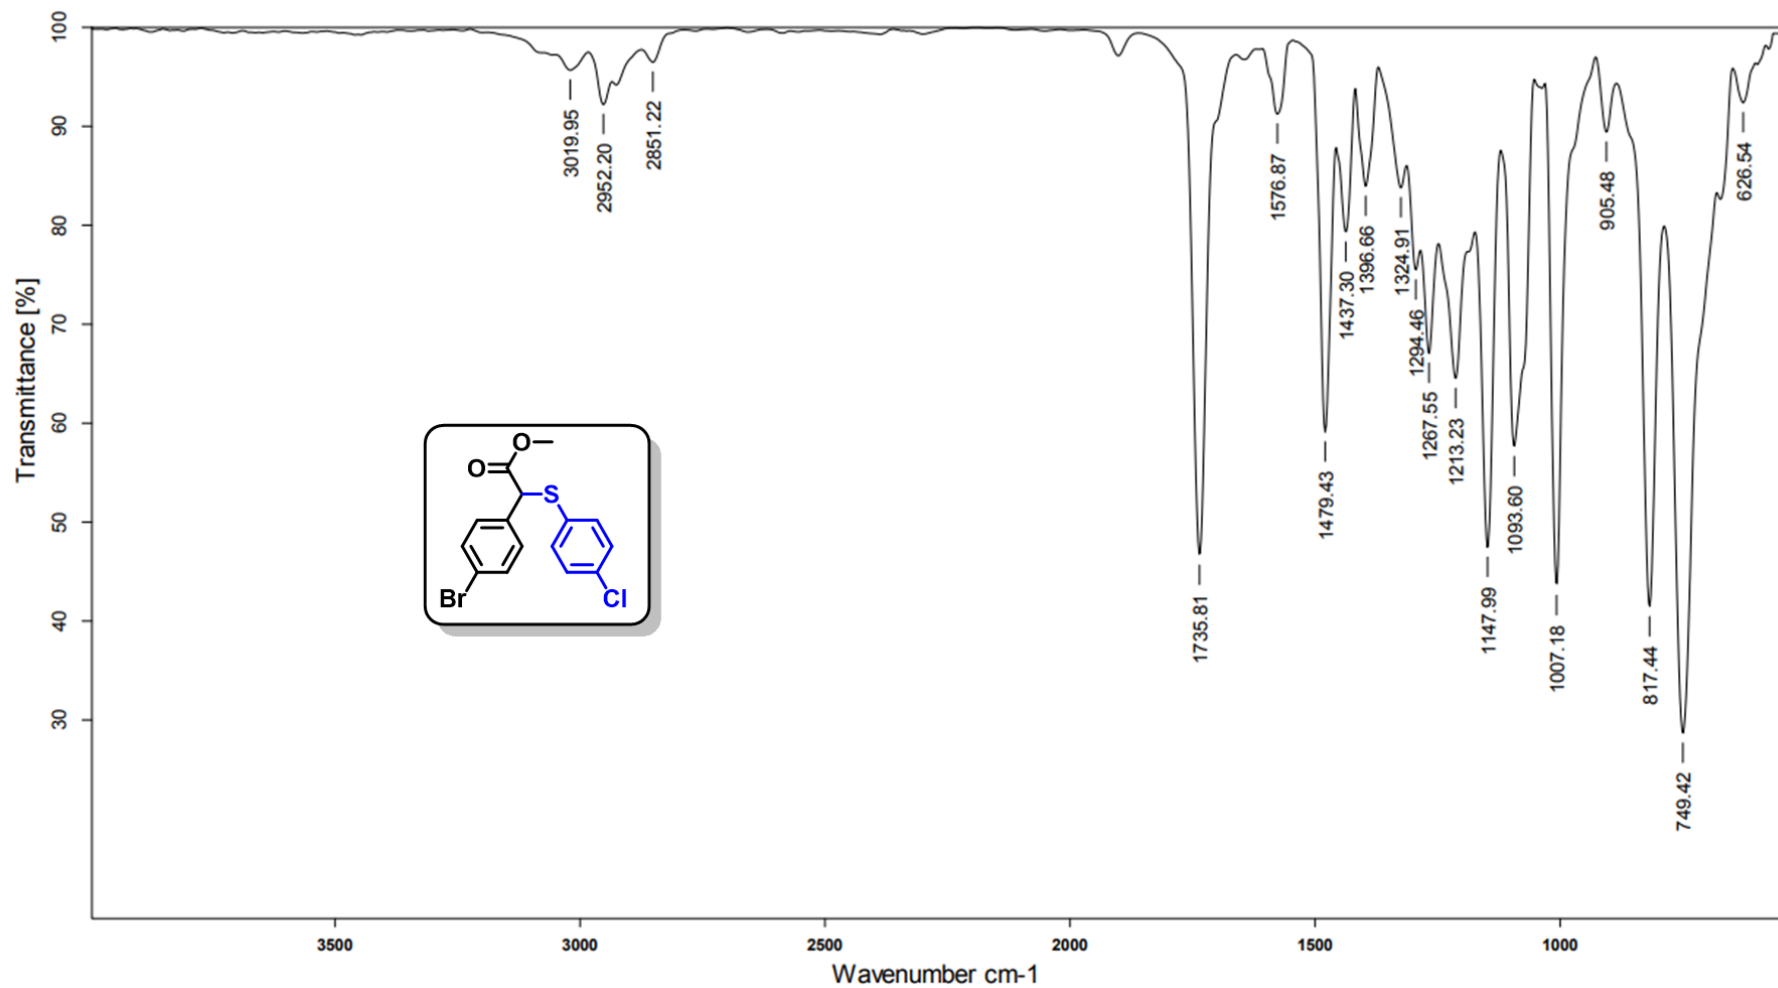

**Fig. S114.** IR spectra of spectra of methyl 2-(4-bromophenyl)-2-((4-chlorophenyl)thio)acetate (**6c**).

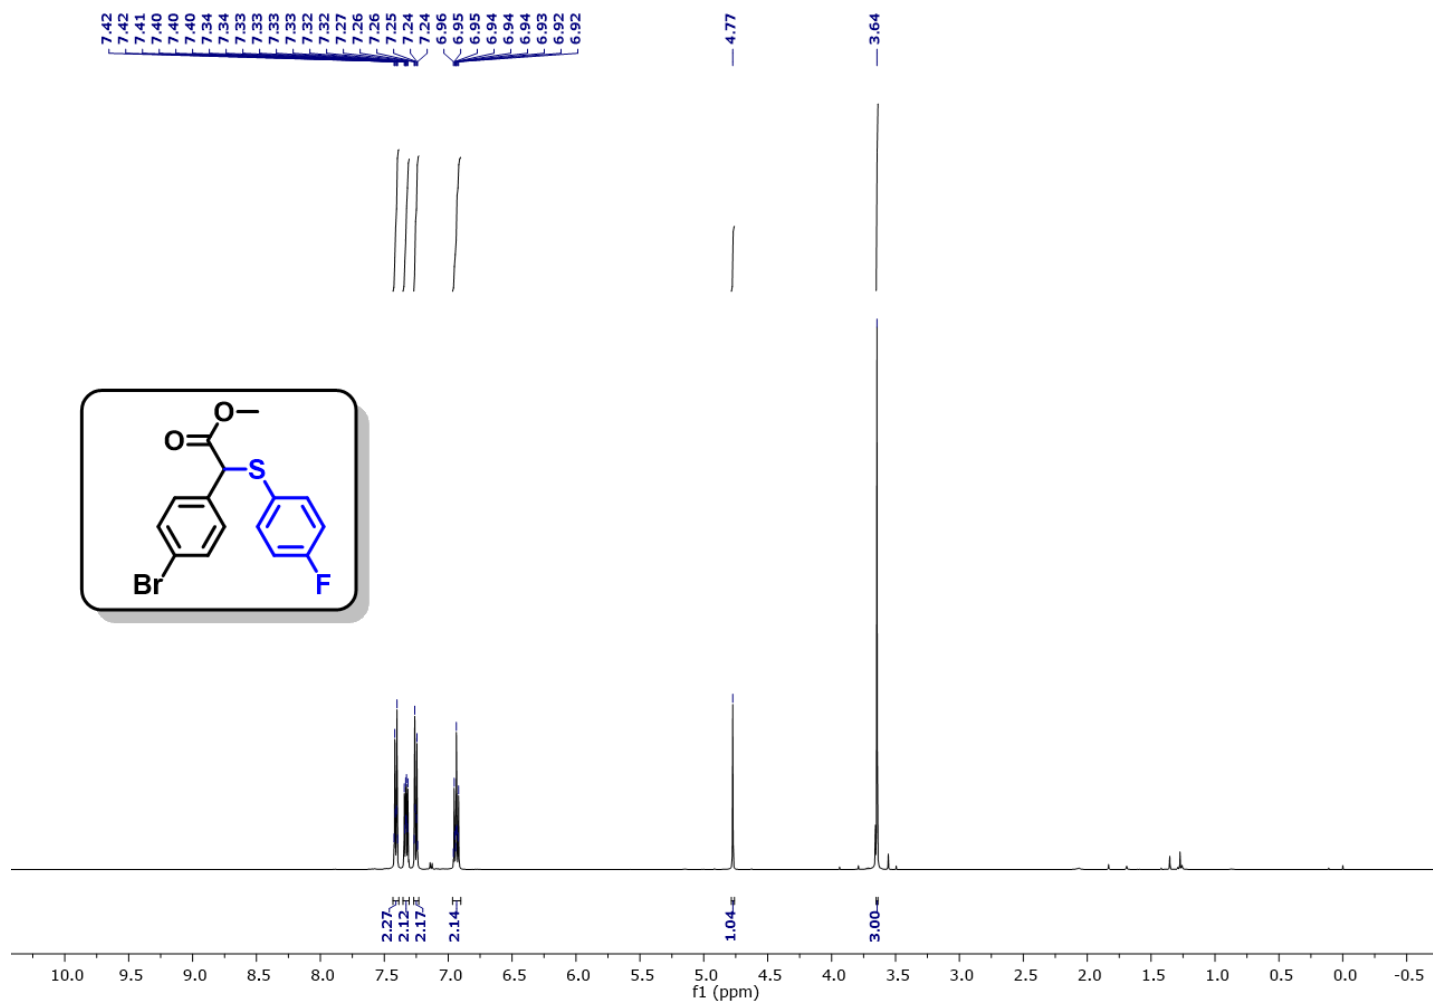

**Fig. S115.** <sup>1</sup>H NMR (500 MHz, CDCl<sub>3</sub>) spectra of methyl 2-(4-bromophenyl)-2-((4-fluorophenyl)thio)acetate (**6d**).

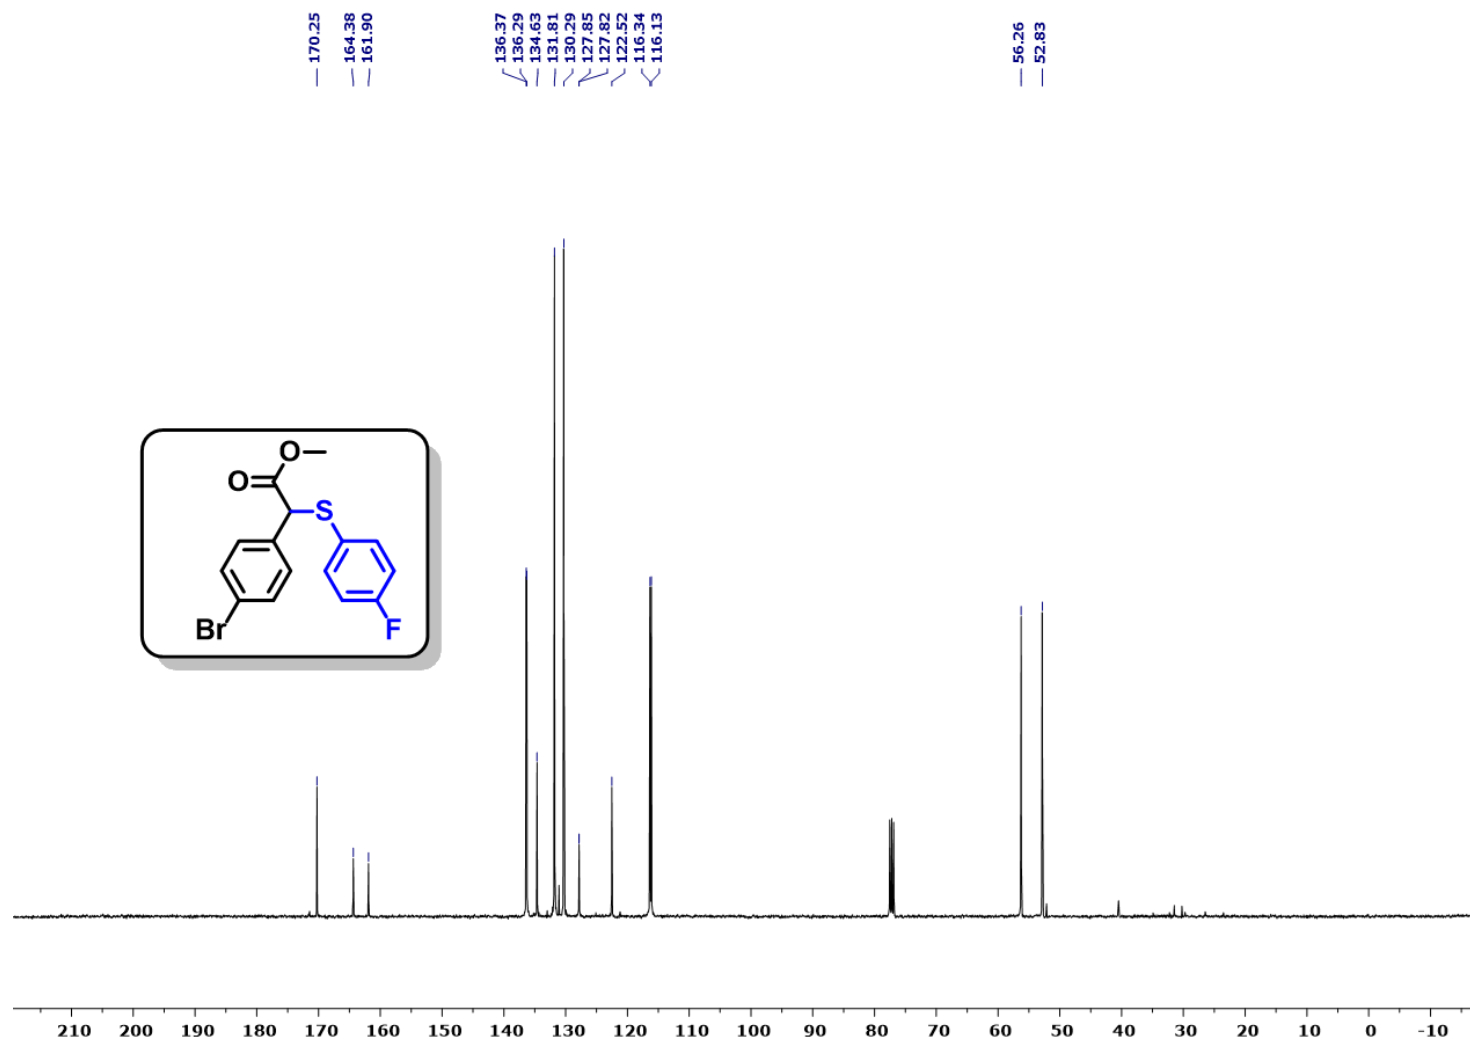

**Fig. S116.**  $^{13}\text{C}$  NMR (101 MHz, CDCl<sub>3</sub>) spectra of methyl 2-(4-bromophenyl)-2-((4-fluorophenyl)thio)acetate (**6d**).

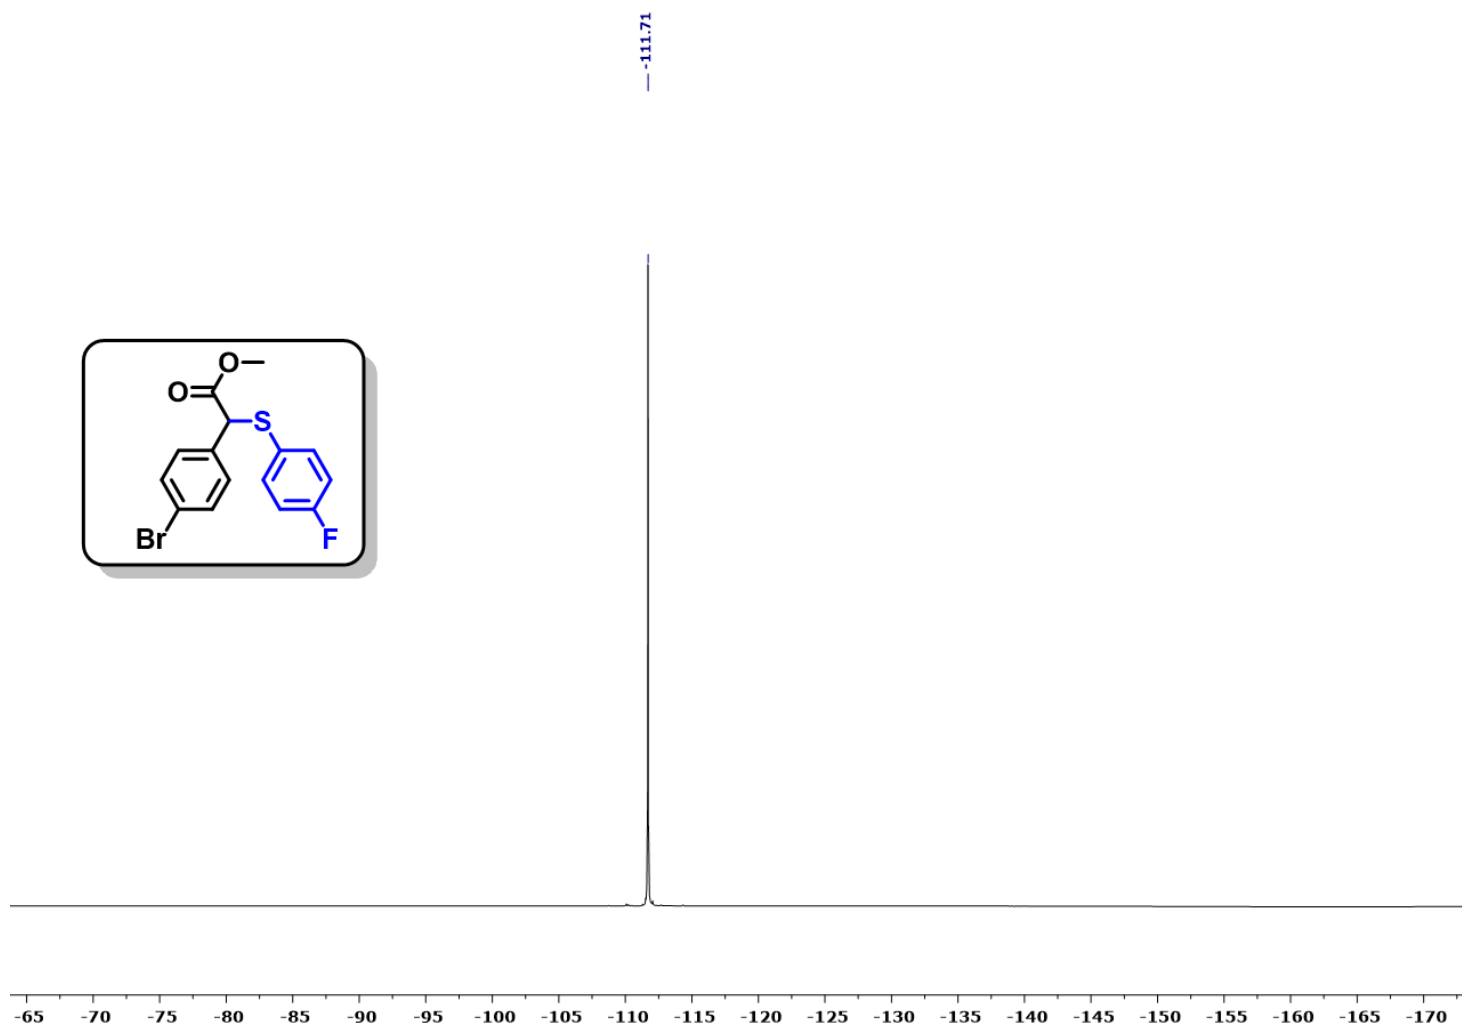

**Fig. S117.**  $^{19}\text{F}$  NMR (471 MHz,  $\text{CDCl}_3$ ) spectra of methyl 2-(4-bromophenyl)-2-((4-fluorophenyl)thio)acetate (**6d**).

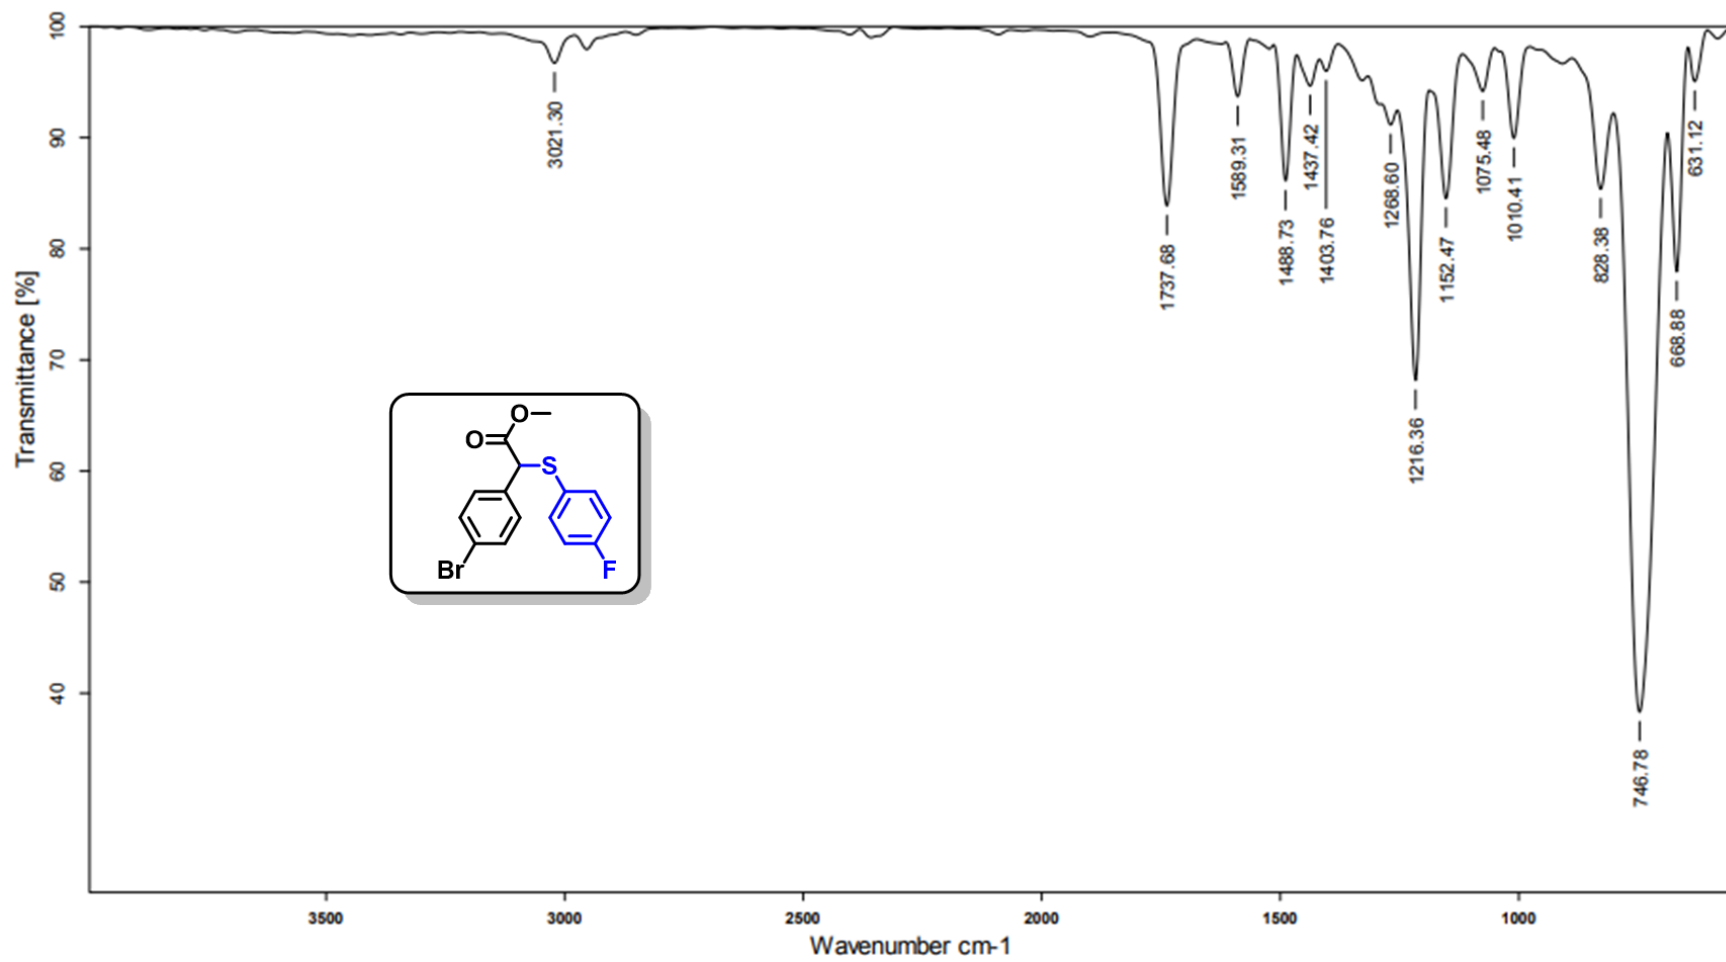

**Fig. S118.** IR spectra of spectra of methyl 2-(4-bromophenyl)-2-((4-fluorophenyl)thio)acetate (**6d**).

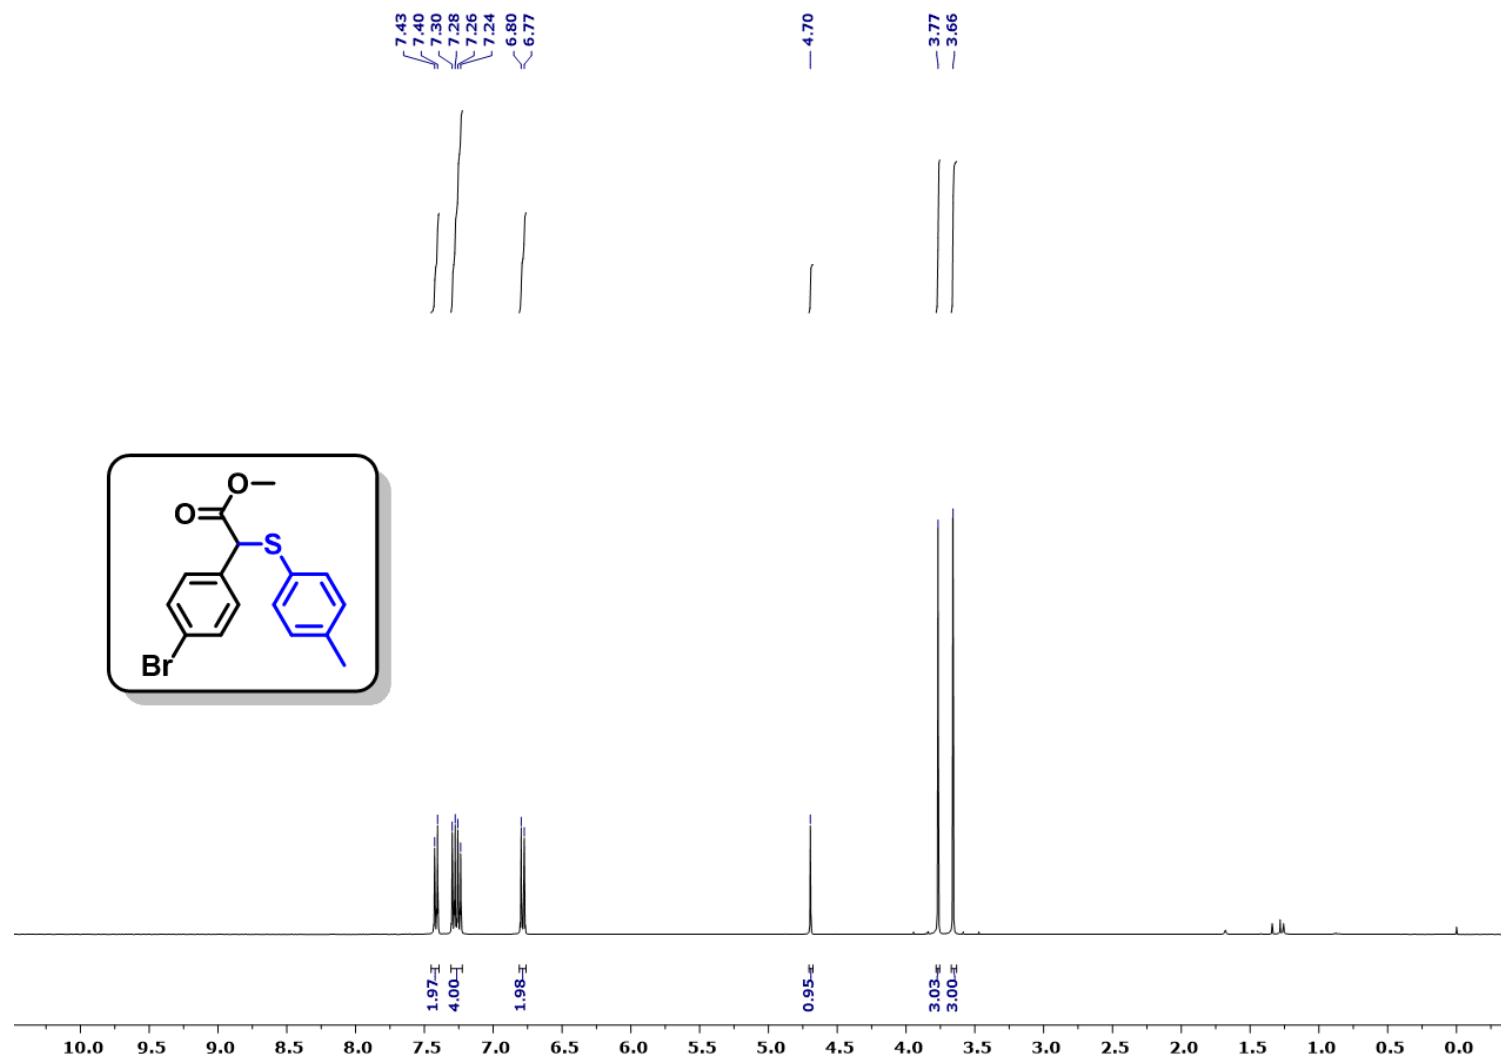

**Fig. S119.** <sup>1</sup>H NMR (400 MHz, CDCl<sub>3</sub>) spectra of methyl 2-(4-bromophenyl)-2-(p-tolylthio)acetate (**6e**).



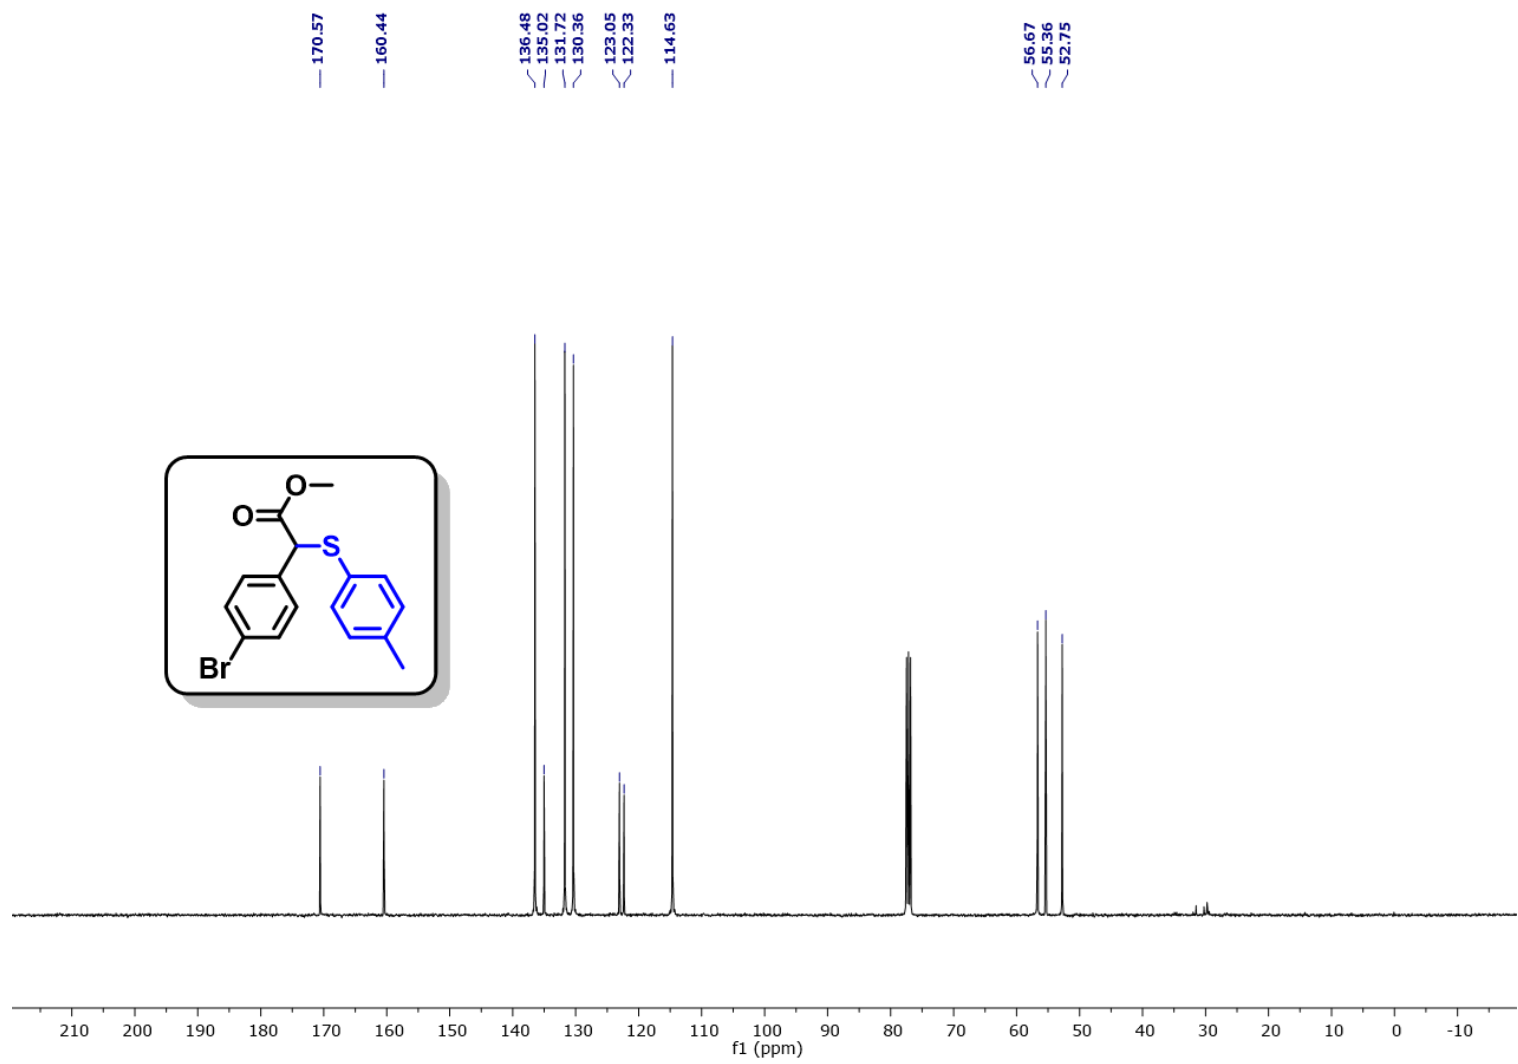

**Fig. S120.** <sup>13</sup>C NMR (101 MHz, CDCl<sub>3</sub>) spectra of methyl 2-(4-bromophenyl)-2-(p-tolylthio)acetate (**6e**).

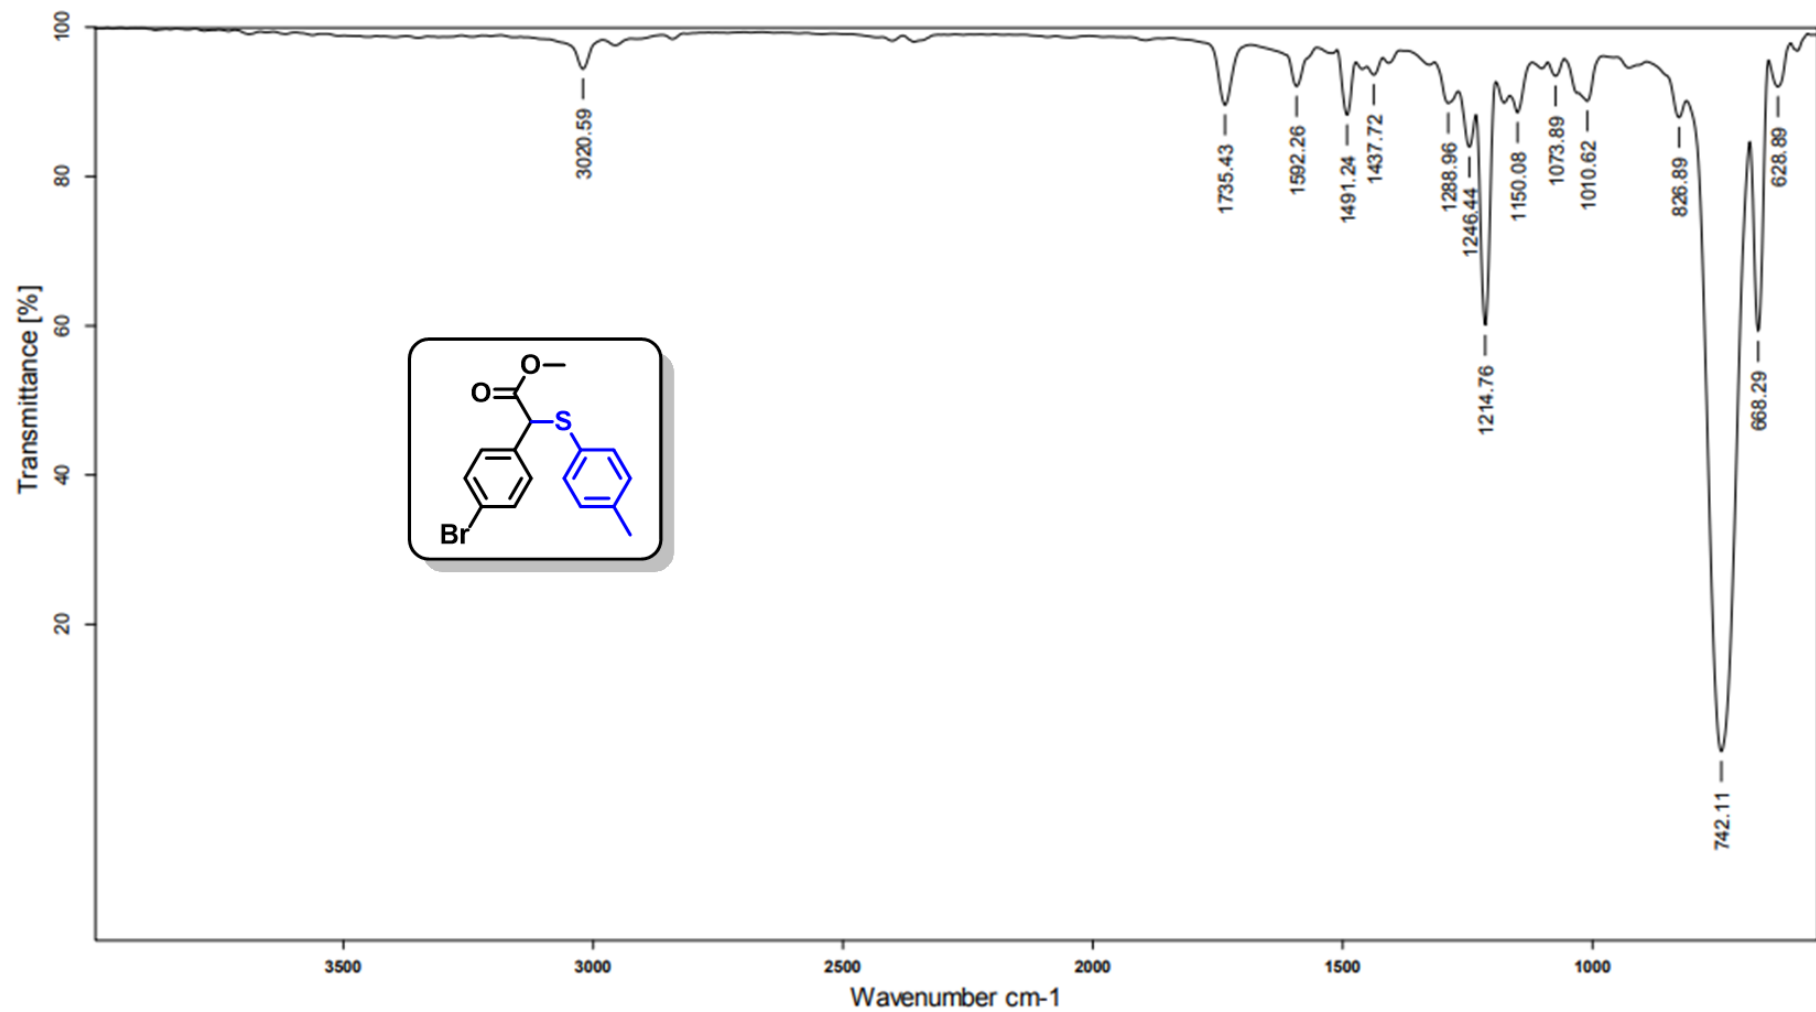

**Fig. S121.** IR spectra of spectra of methyl 2-(4-bromophenyl)-2-(p-tolylthio)acetate (**6e**).

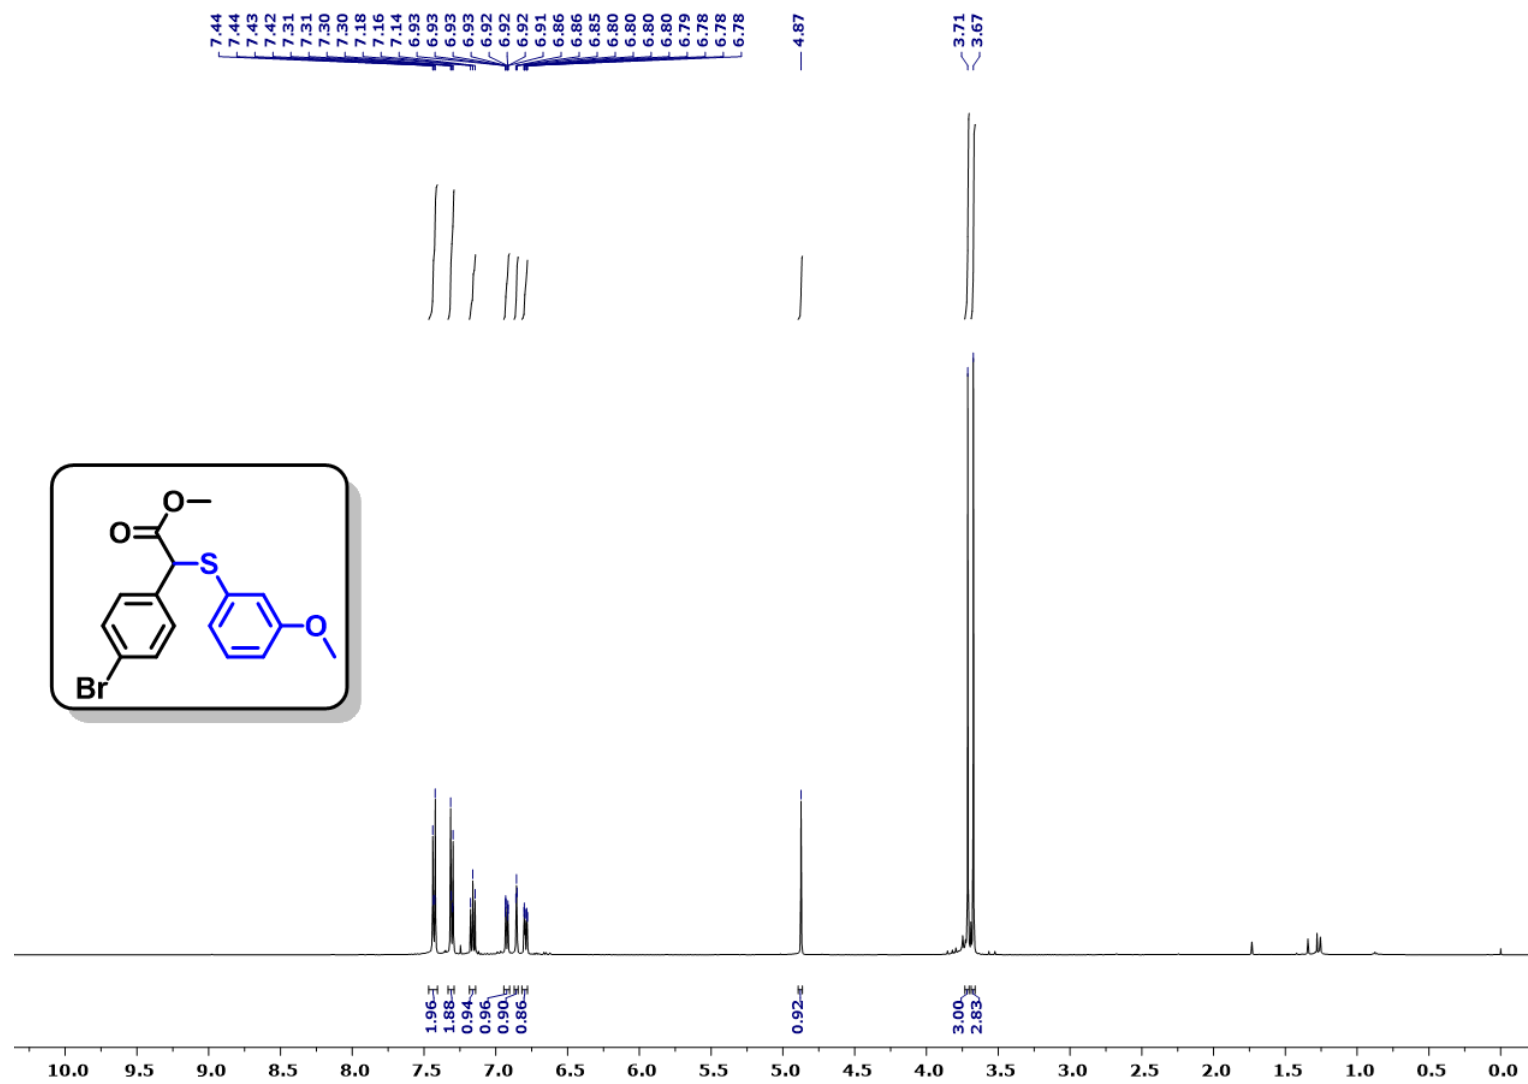

**Fig. S122.** <sup>1</sup>H NMR (500 MHz, CDCl<sub>3</sub>) spectra of methyl 2-(4-bromophenyl)-2-((3-methoxyphenyl)thio)acetate (**6f**).

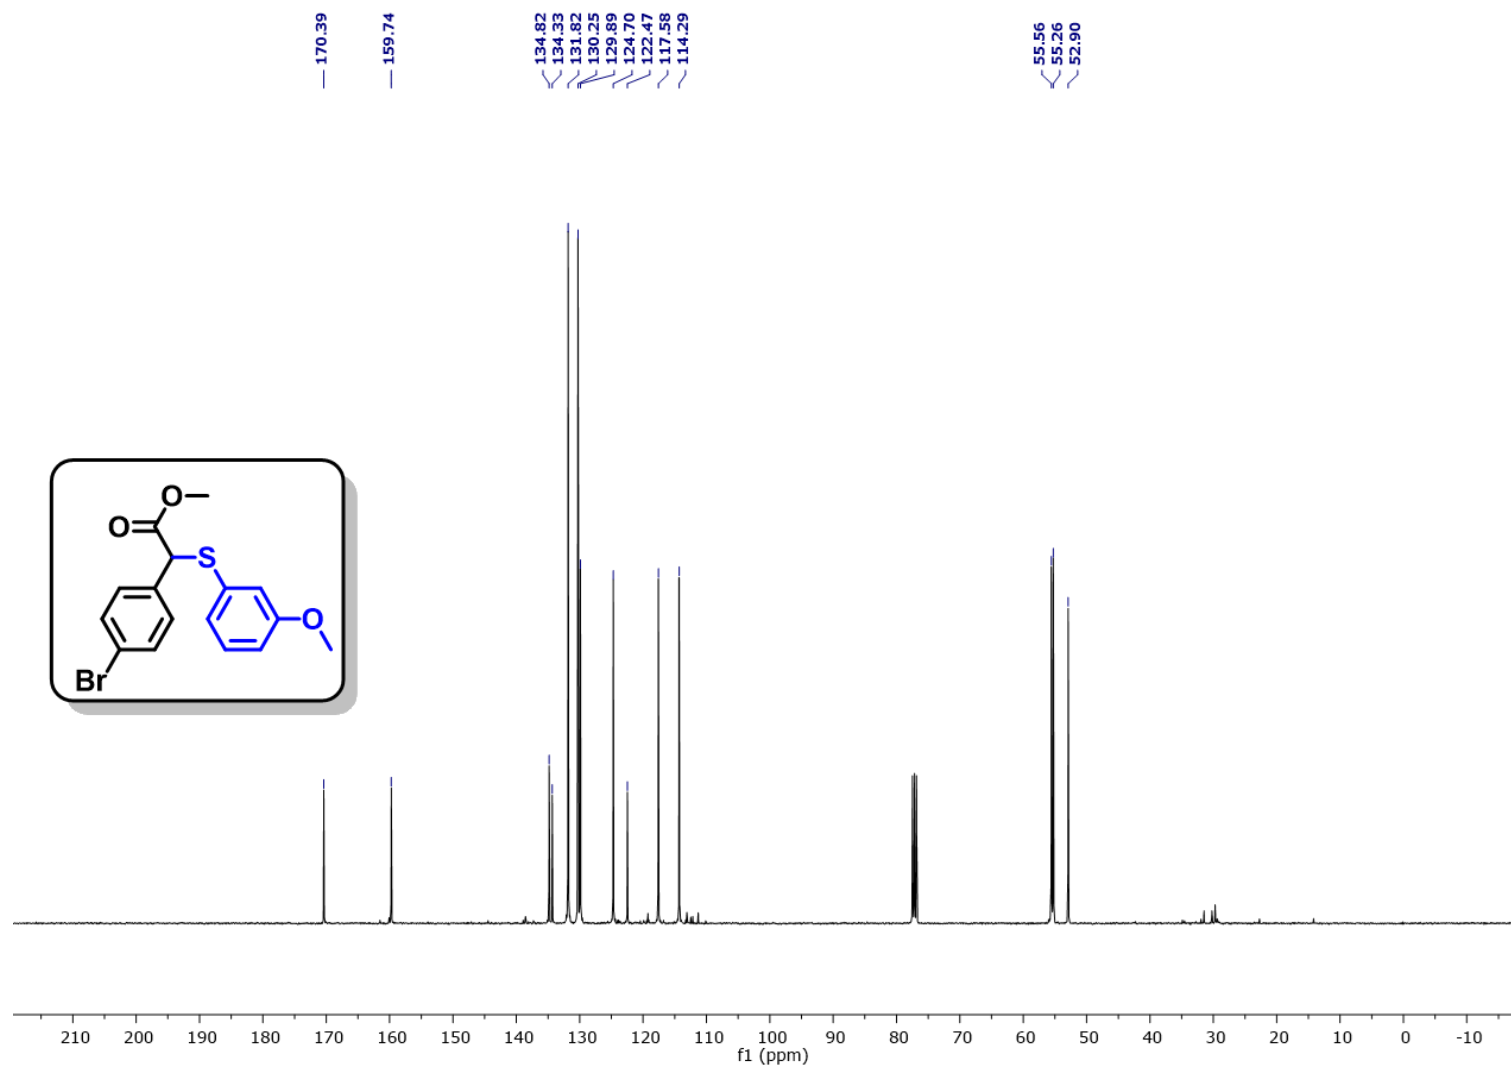

**Fig. S123.**  $^{13}\text{C}$  NMR (101 MHz,  $\text{CDCl}_3$ ) spectra of methyl 2-(4-bromophenyl)-2-((3-methoxyphenyl)thio)acetate (**6f**).

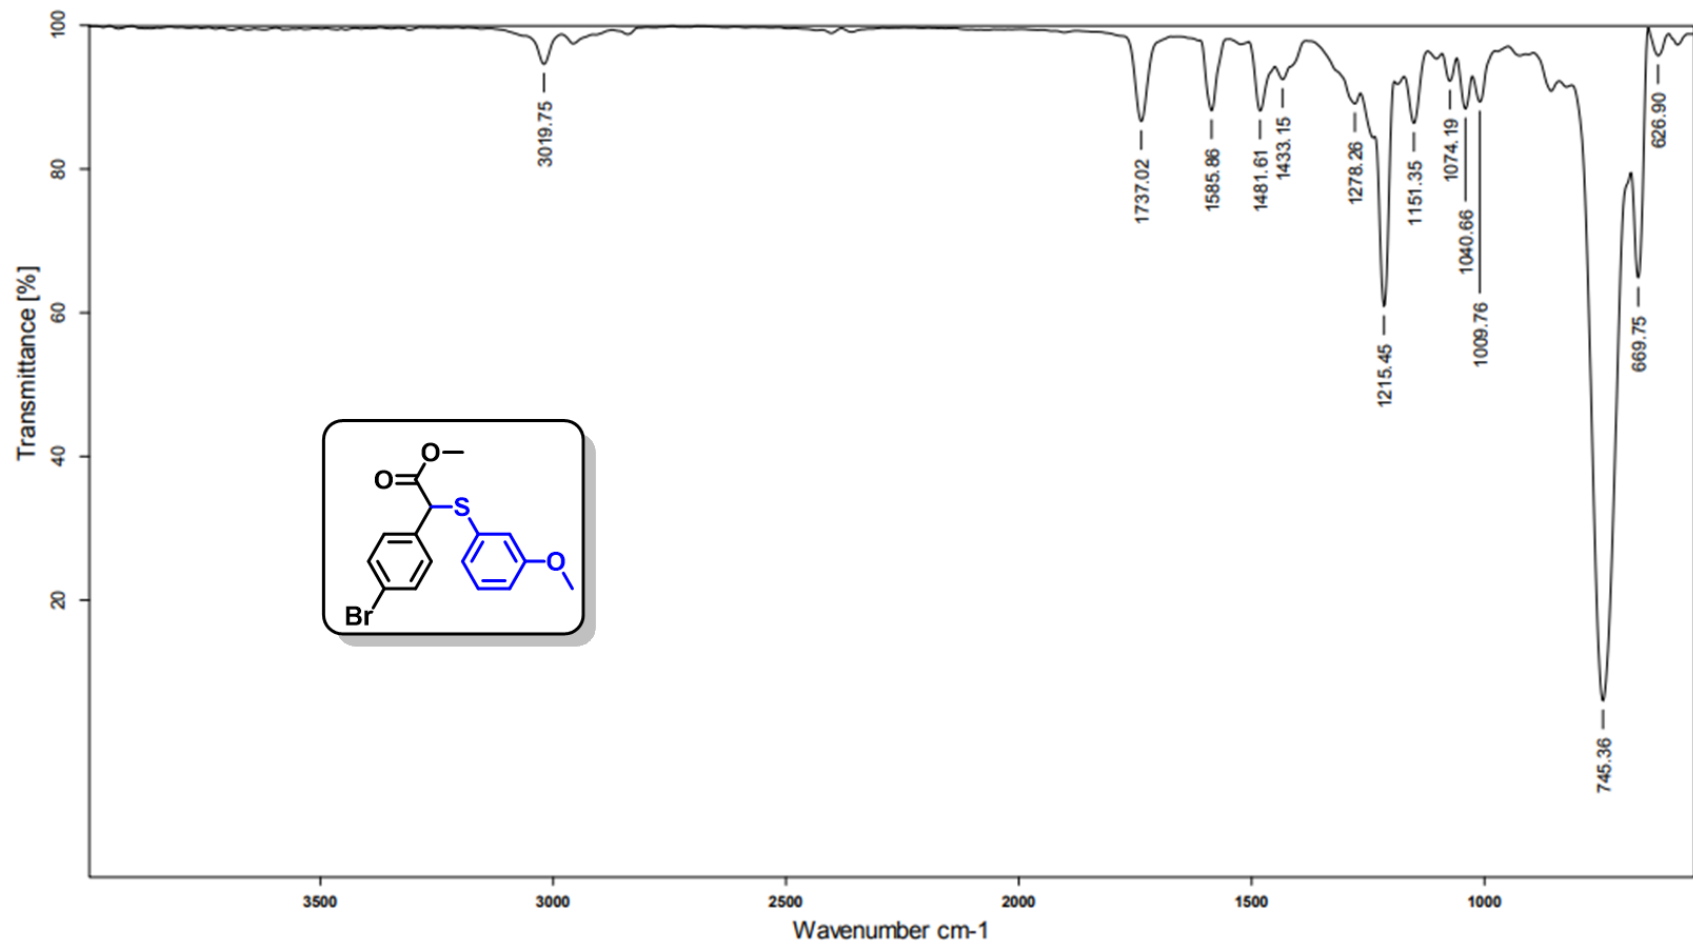

Fig. S124. IR spectra of spectra of methyl 2-(4-bromophenyl)-2-((3-methoxyphenyl)thio)acetate (**6f**).

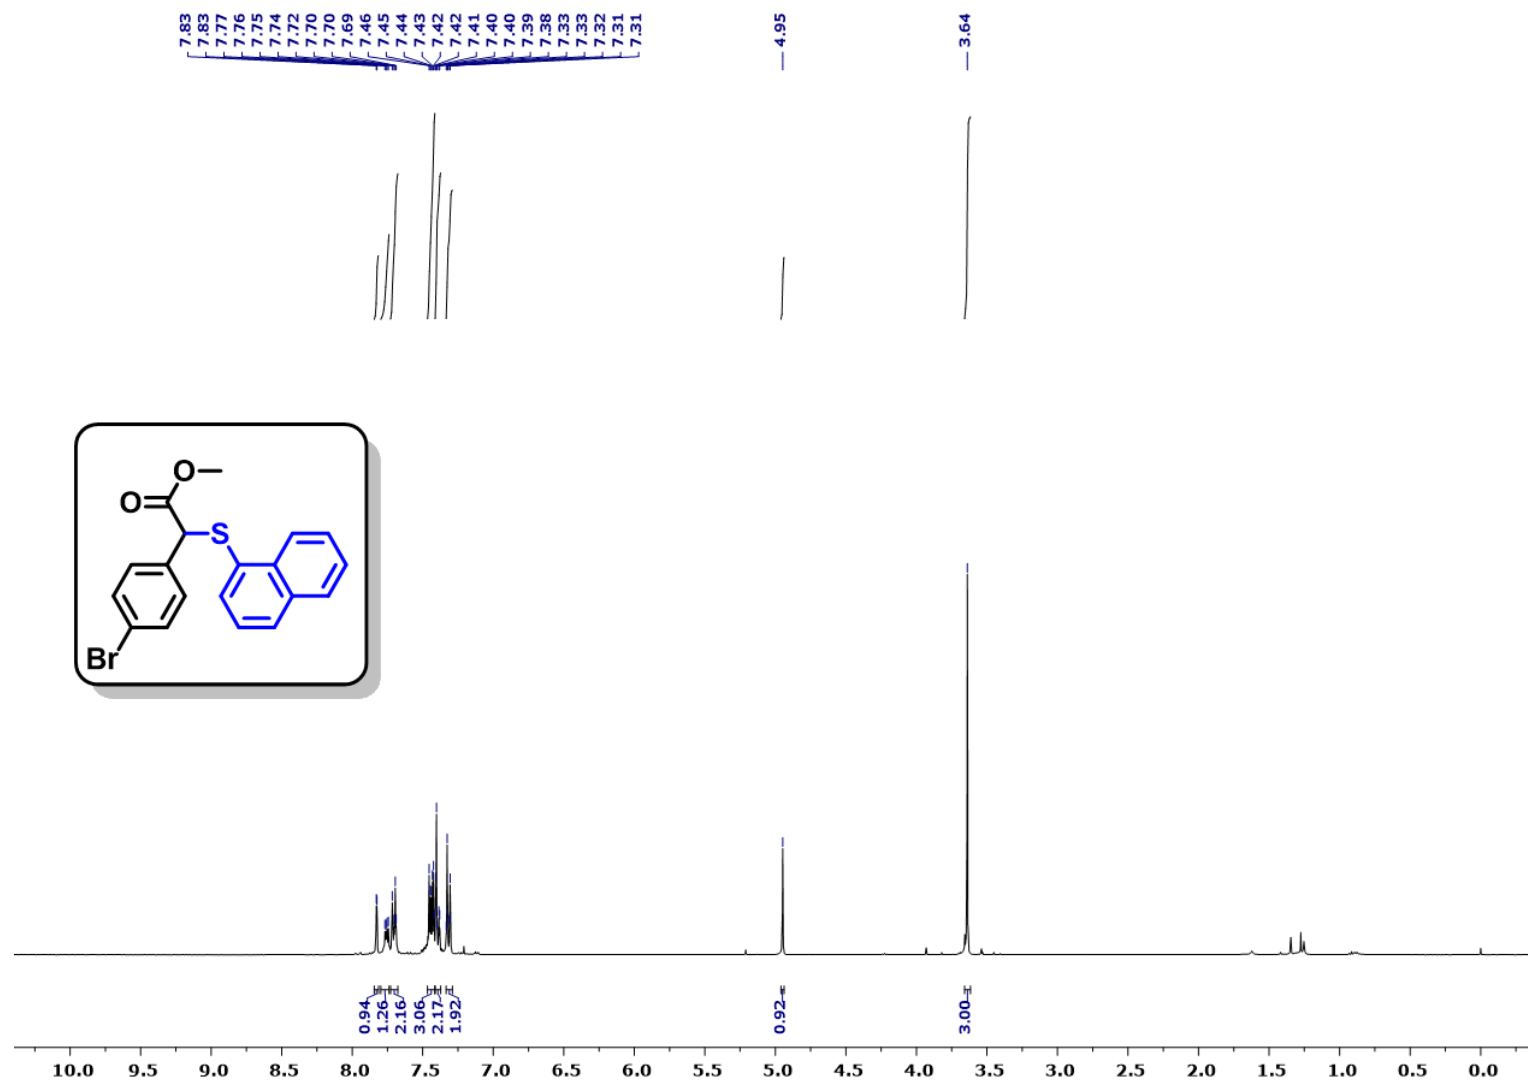

**Fig. S125.** <sup>1</sup>H NMR (400 MHz, CDCl<sub>3</sub>) spectra of methyl 2-(4-bromophenyl)-2-(naphthalen-1-ylthio)acetate (**6g**).

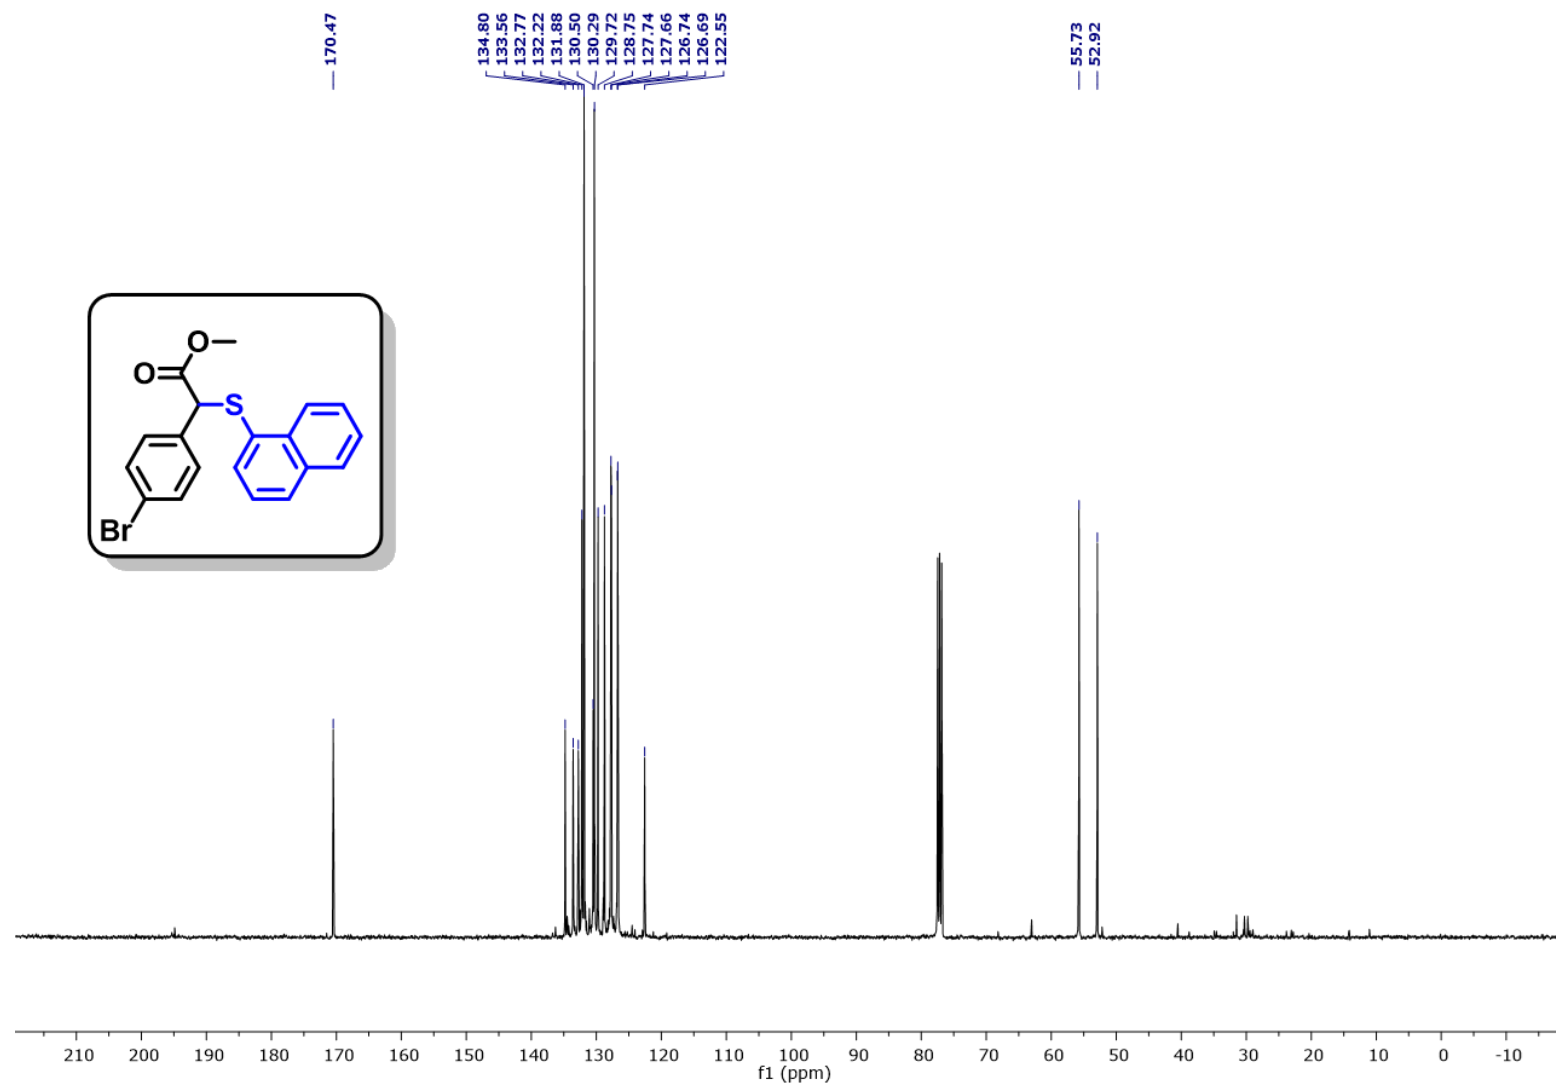

**Fig. S126.** <sup>13</sup>C NMR (101 MHz, CDCl<sub>3</sub>) spectra of methyl 2-(4-bromophenyl)-2-(naphthalen-1-ylthio)acetate (**6g**).

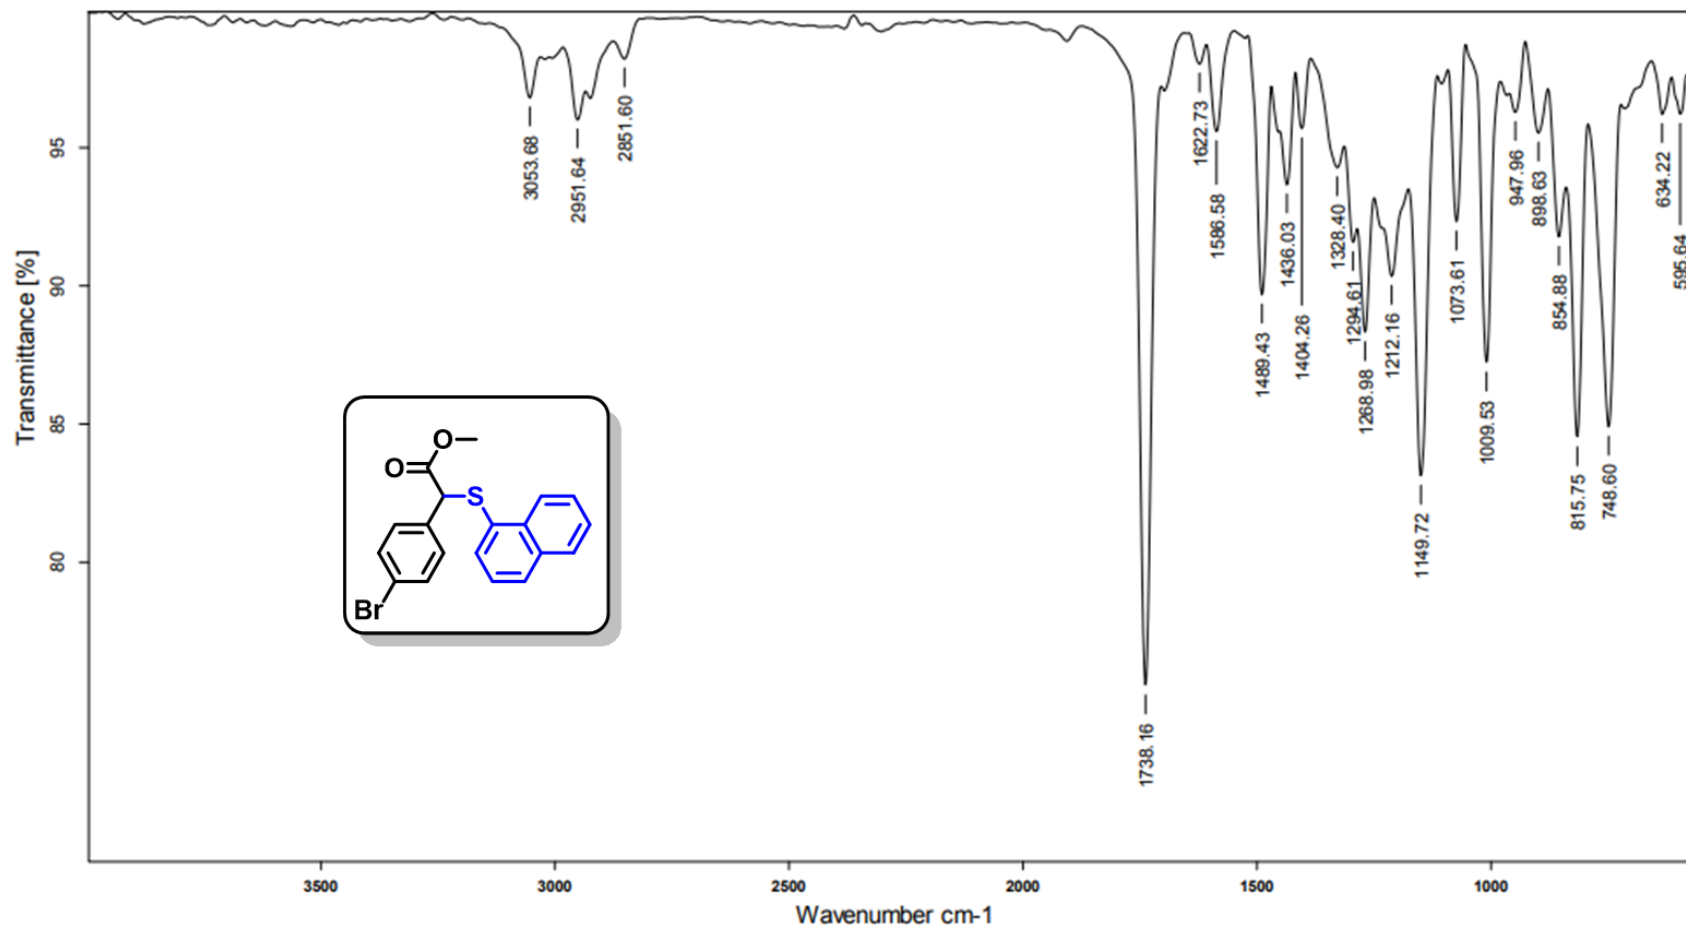

**Fig. S127.** IR spectra of spectra of methyl 2-(4-bromophenyl)-2-(naphthalen-1-ylthio)acetate (**6g**).



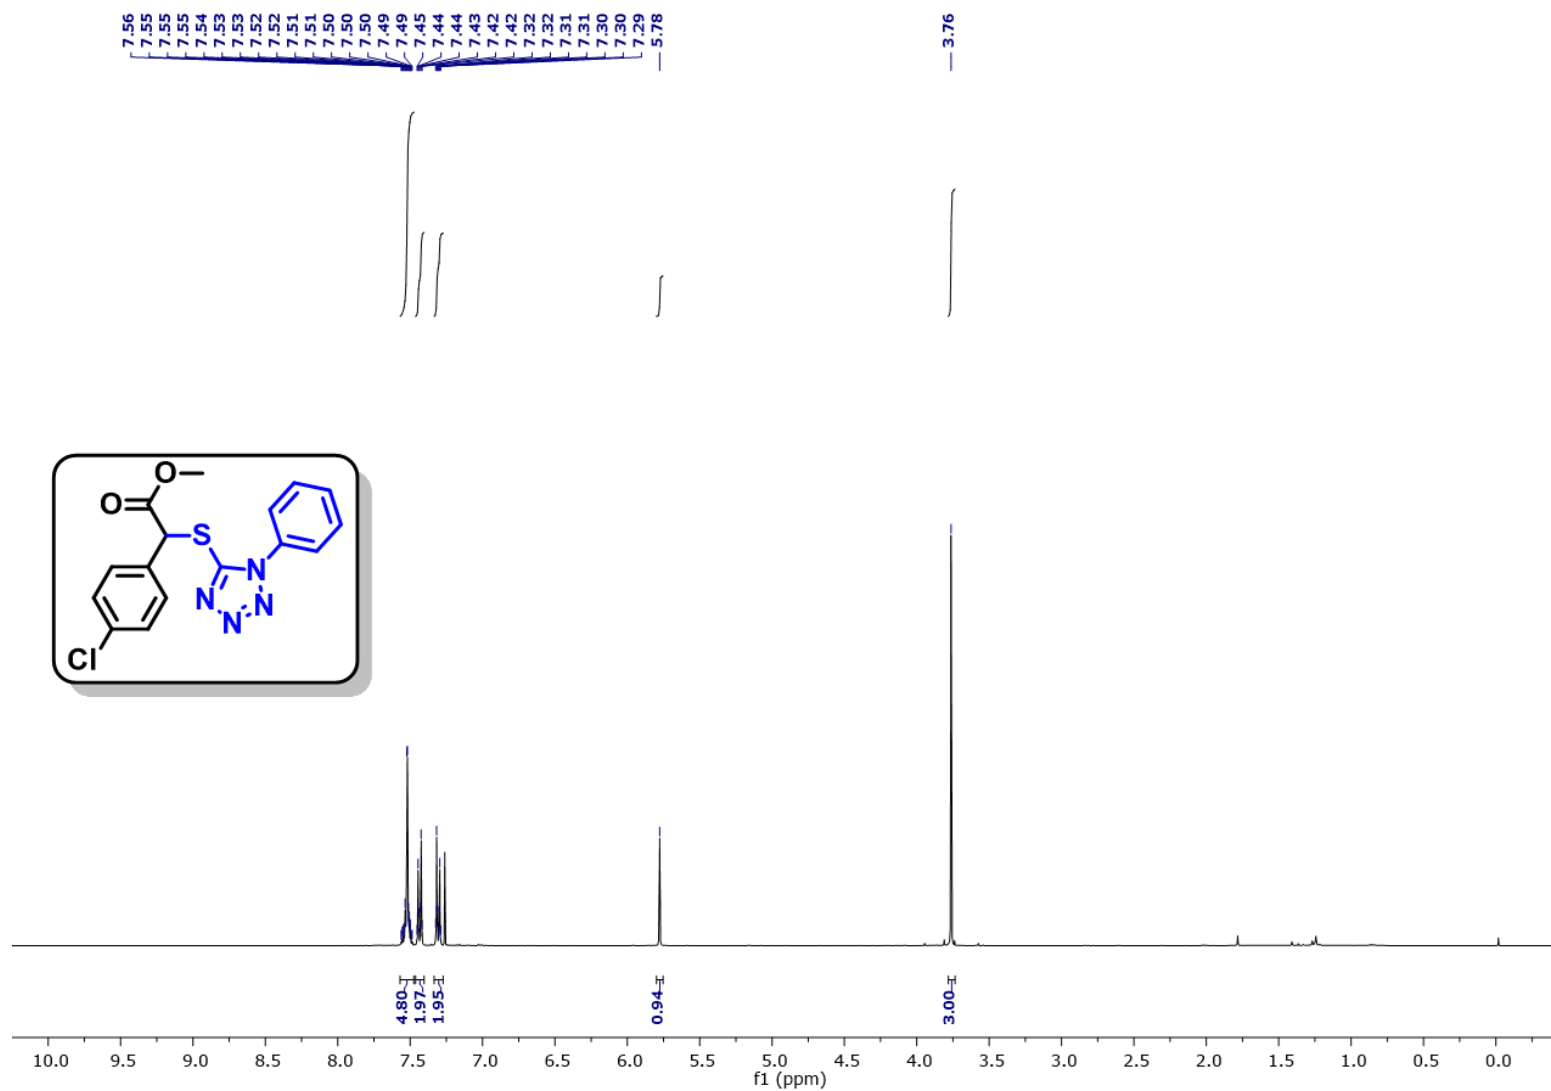

**Fig. S128.** <sup>1</sup>H NMR (400 MHz, CDCl<sub>3</sub>) spectra of methyl 2-(4-chlorophenyl)-2-((1-phenyl-1H-tetrazol-5-yl)thio)acetate (**6h**).

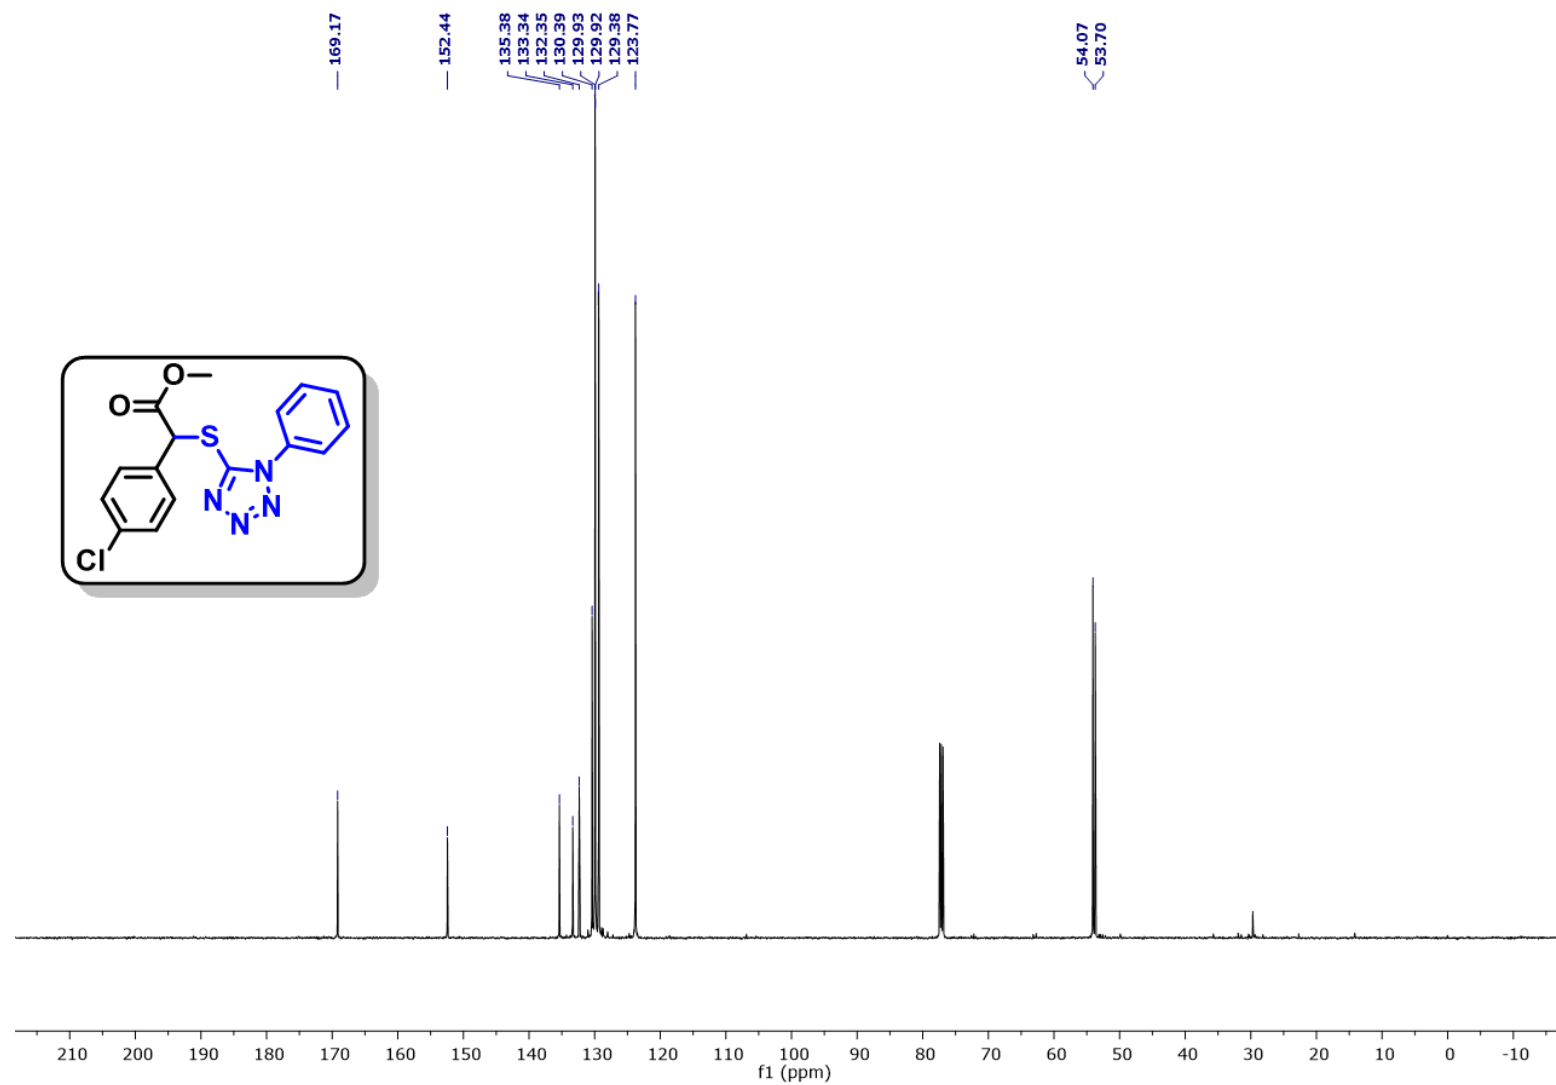

**Fig. S129.**  $^{13}\text{C}$  NMR (126 MHz,  $\text{CDCl}_3$ ) spectra of methyl 2-(4-chlorophenyl)-2-((1-phenyl-1H-tetrazol-5-yl)thio)acetate (**6h**).

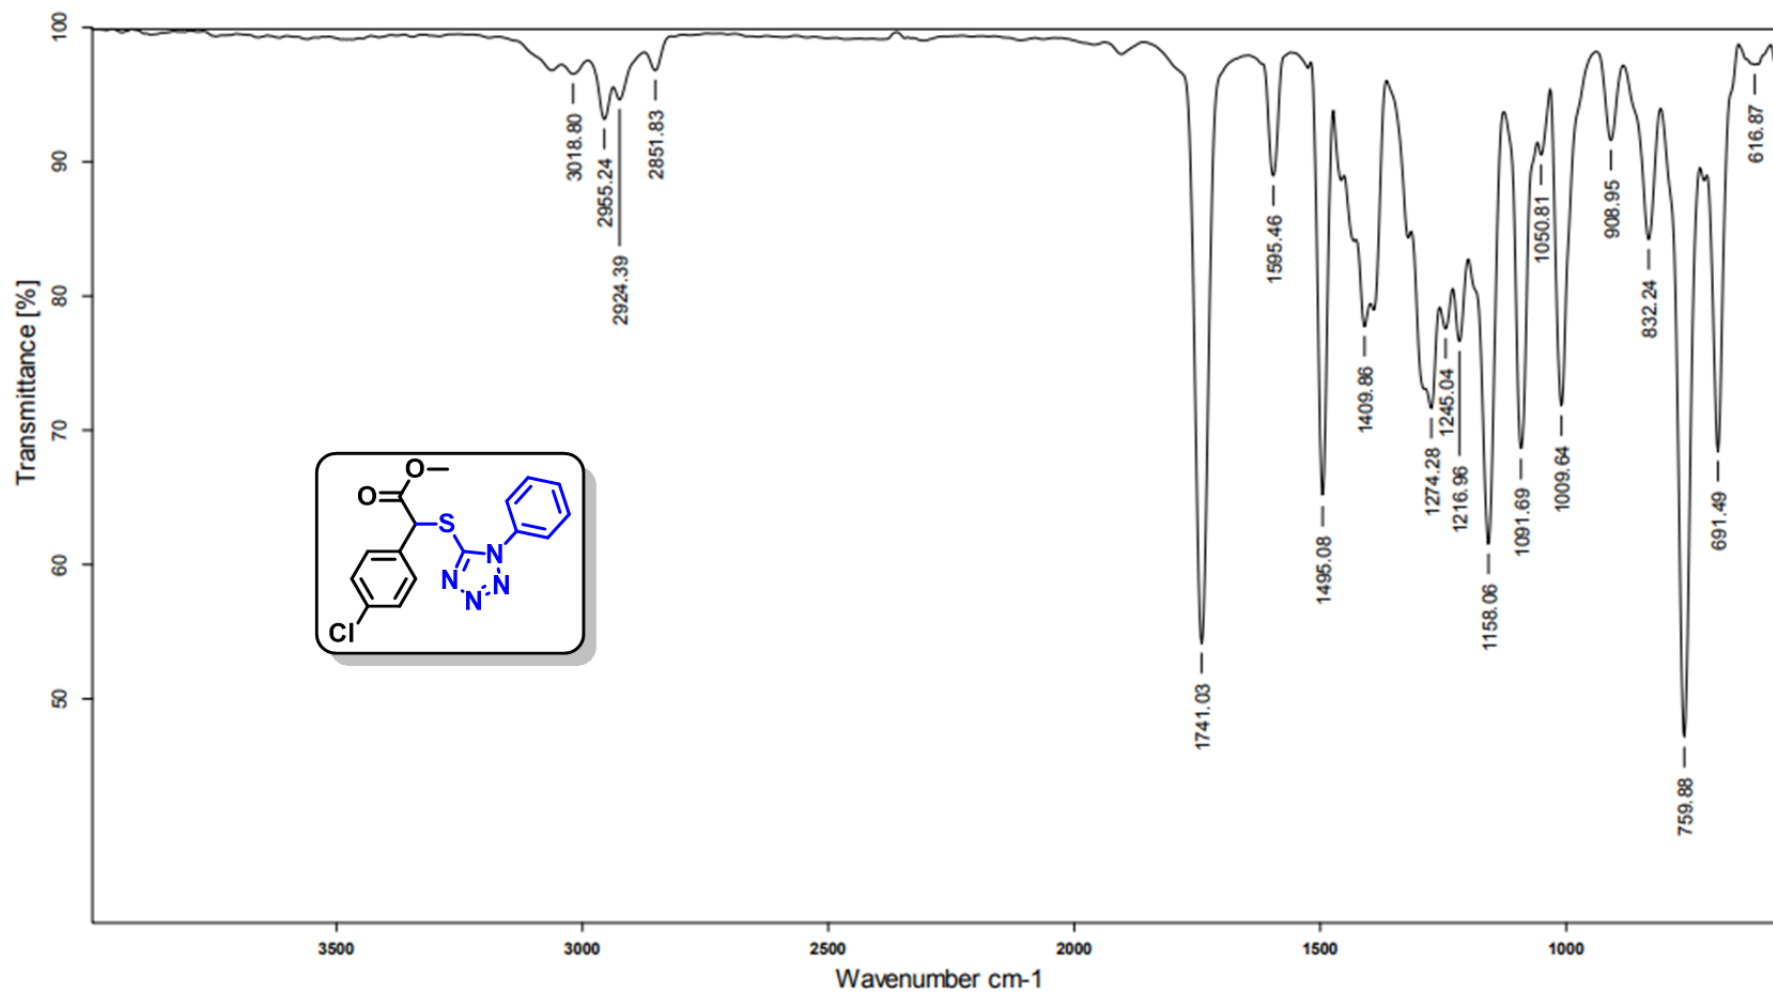

Fig. S130. IR spectra of spectra of methyl 2-(4-chlorophenyl)-2-((1-phenyl-1H-tetrazol-5-yl)thio)acetate (**6h**).

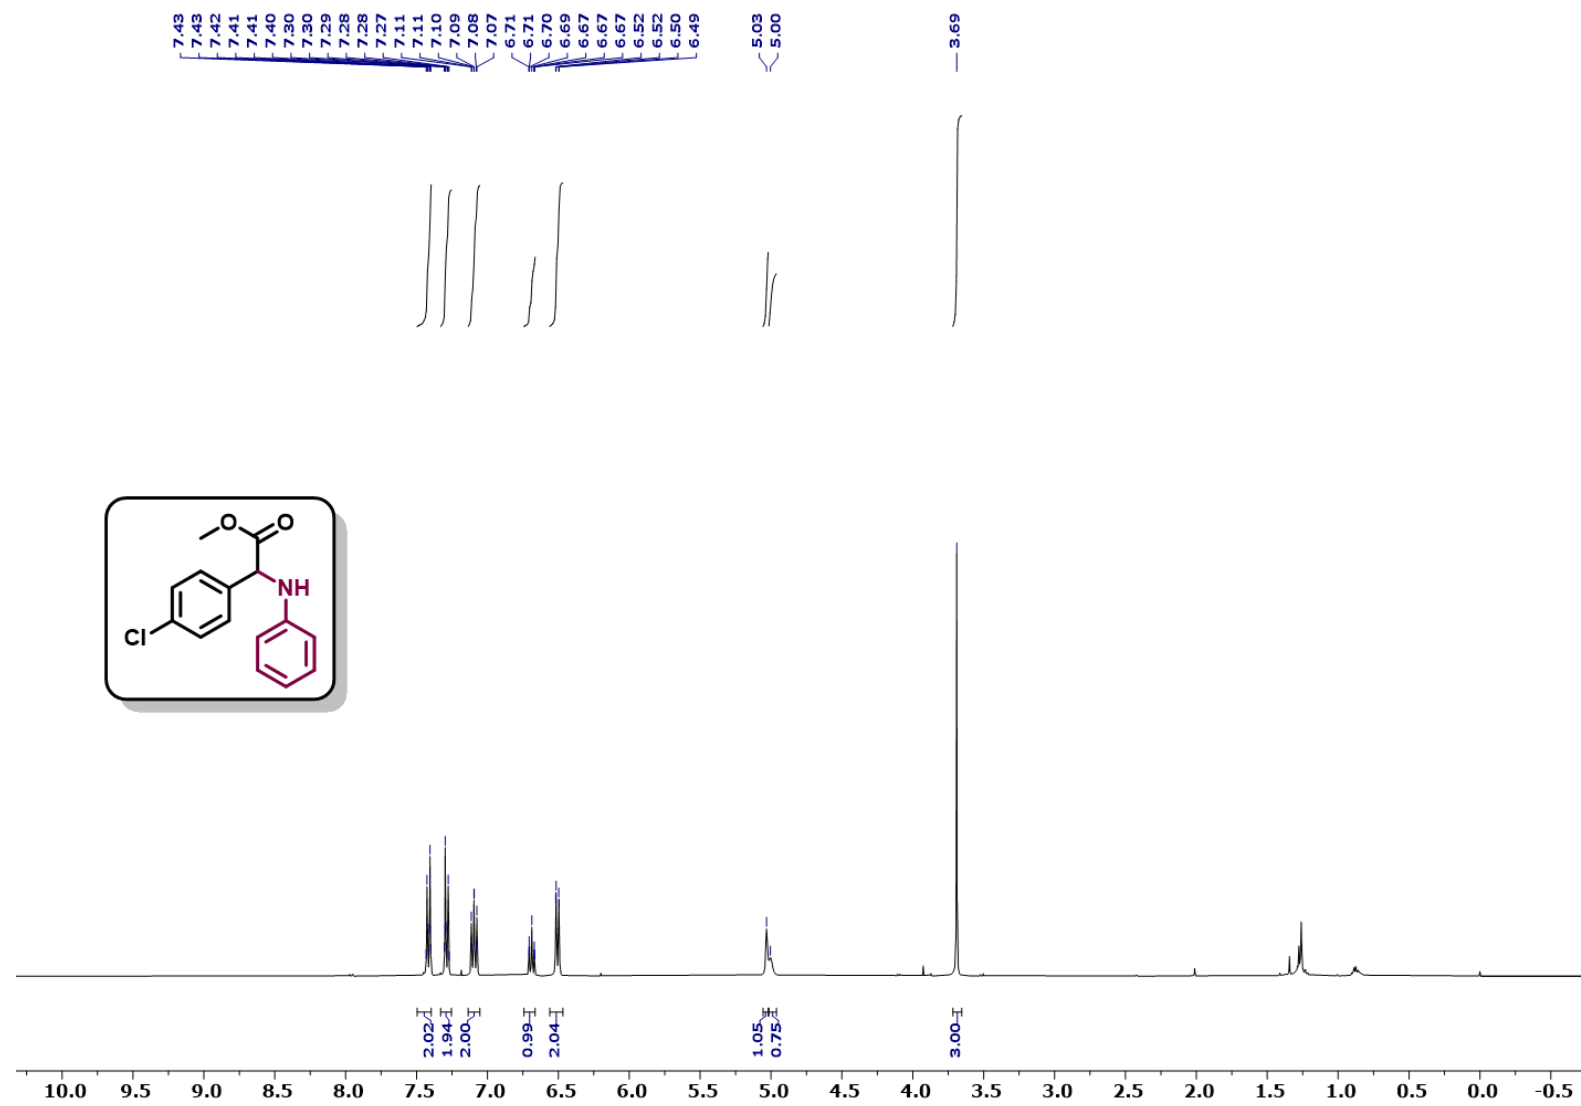

**Fig. S131.** <sup>1</sup>H NMR (400 MHz, CDCl<sub>3</sub>) spectra of methyl 2-(4-chlorophenyl)-2-(phenylamino)acetate (**8a**).

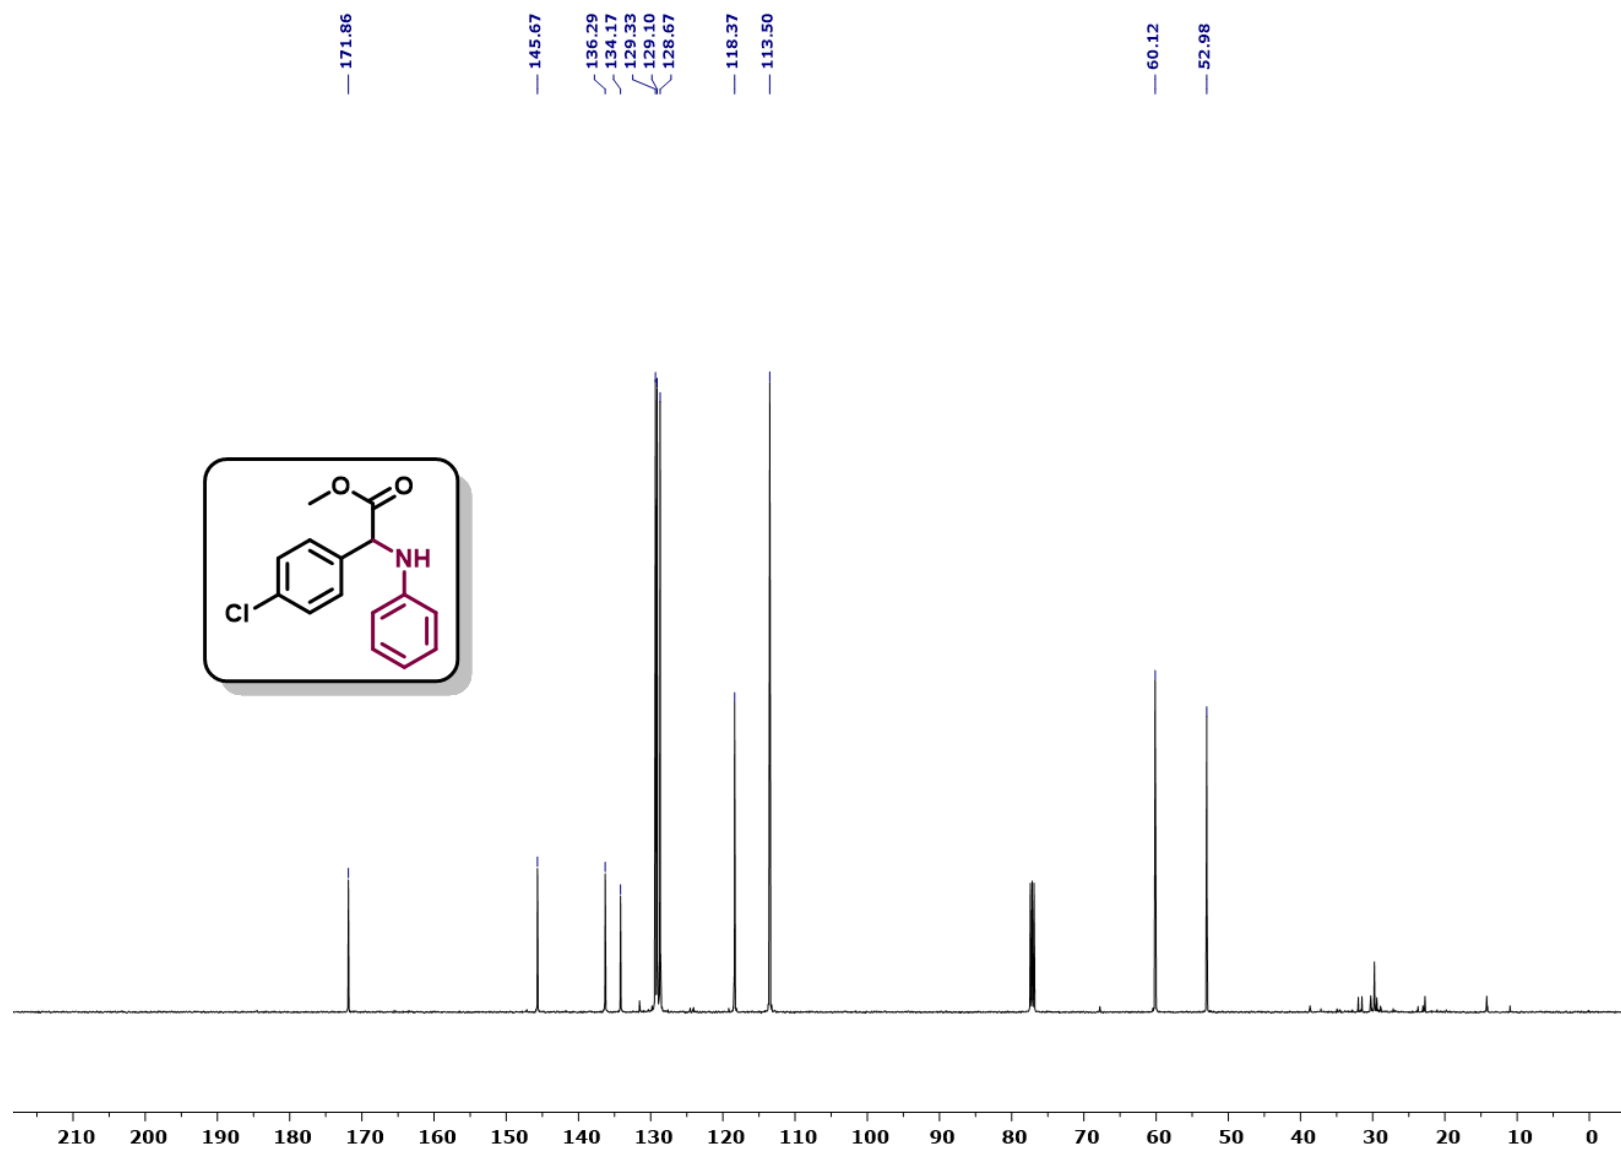

**Fig. S132.**  $^{13}\text{C}$  NMR (126 MHz,  $\text{CDCl}_3$ ) spectra of methyl 2-(4-chlorophenyl)-2-(phenylamino)acetate (**8a**).

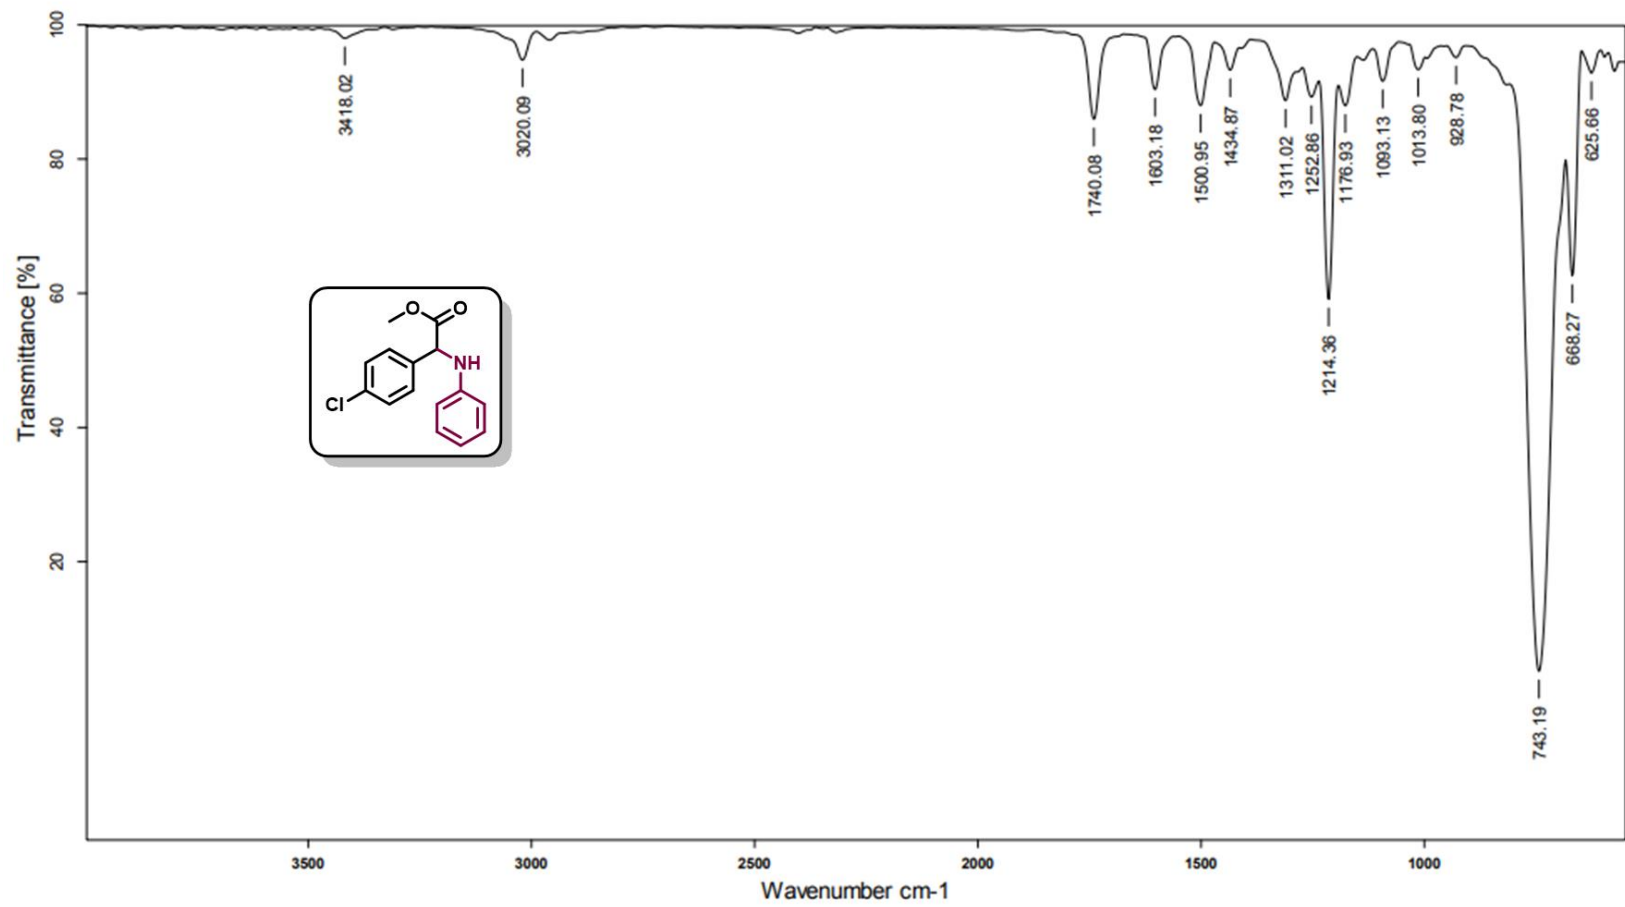

**Fig. S133.** IR spectra of methyl 2-(4-chlorophenyl)-2-(phenylamino)acetate (**8a**).

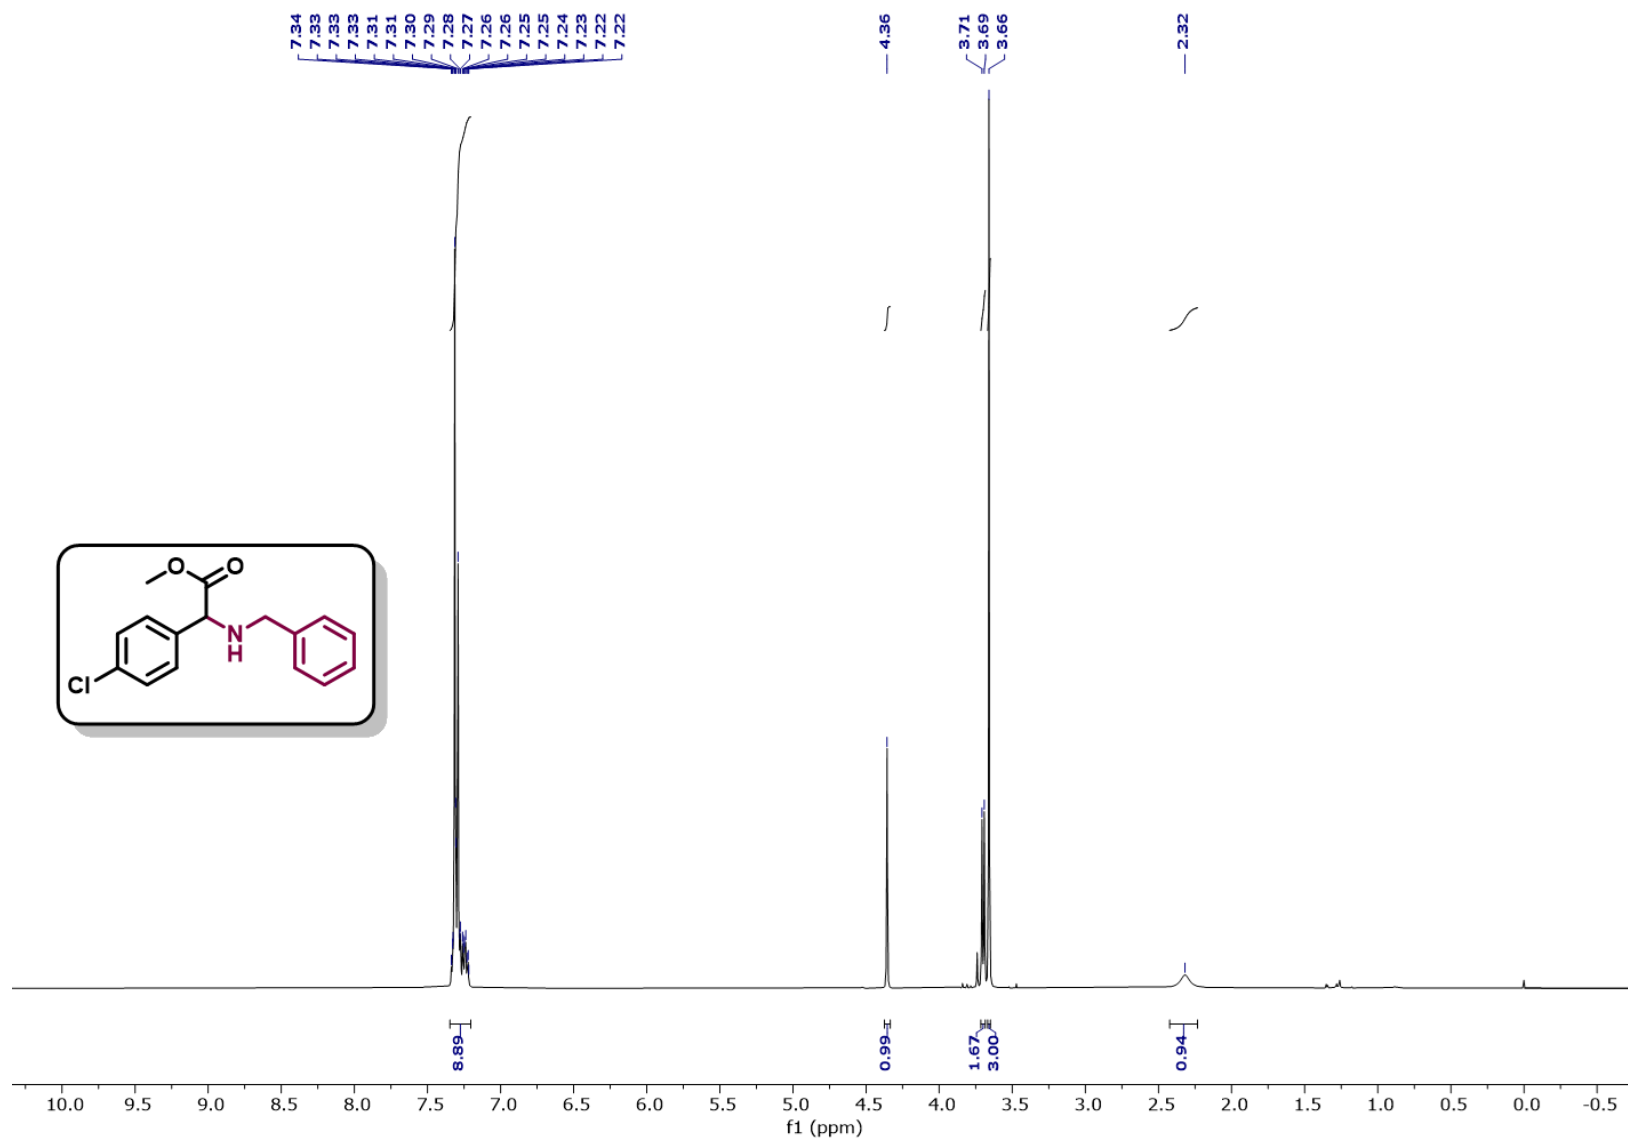

**Fig. S134.** <sup>1</sup>H NMR (400 MHz, CDCl<sub>3</sub>) spectra of methyl 2-(benzylamino)-2-(4-chlorophenyl)acetate (**8b**).

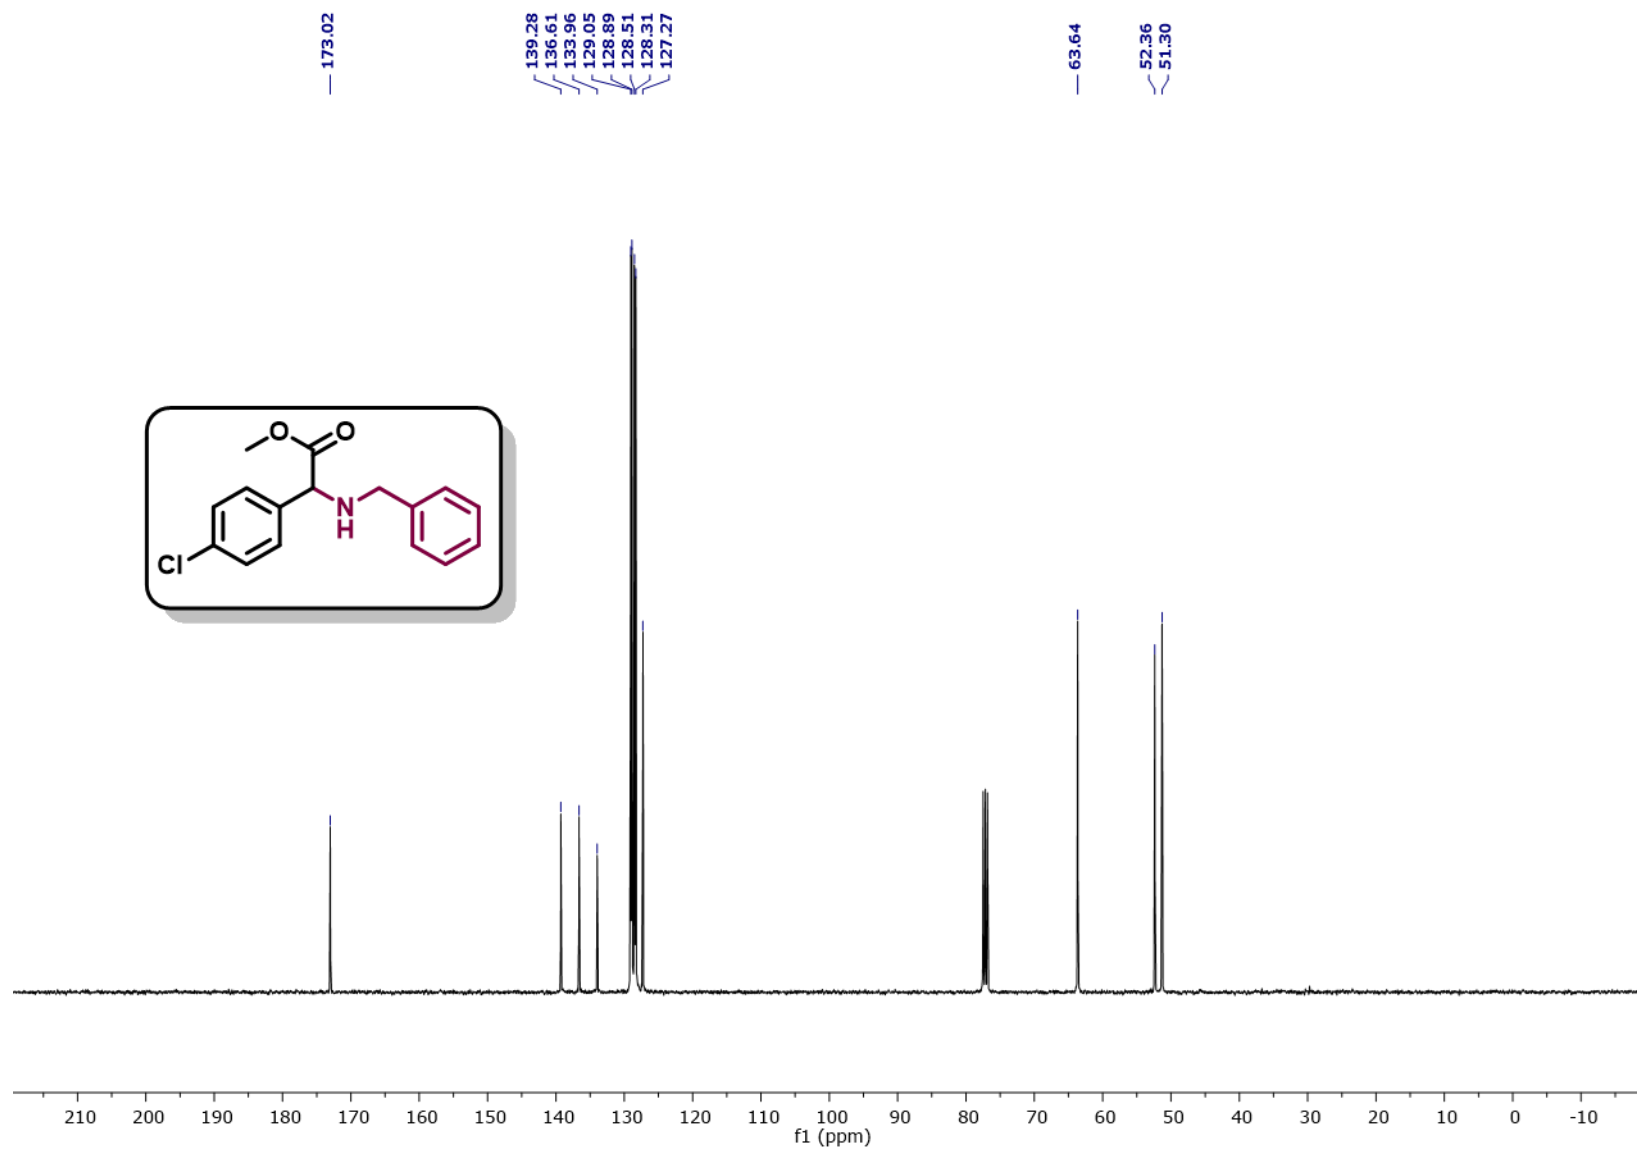

**Fig. S135.**  $^{13}\text{C}$  NMR (101 MHz,  $\text{CDCl}_3$ ) spectra of methyl 2-(benzylamino)-2-(4-chlorophenyl)acetate (**8b**).



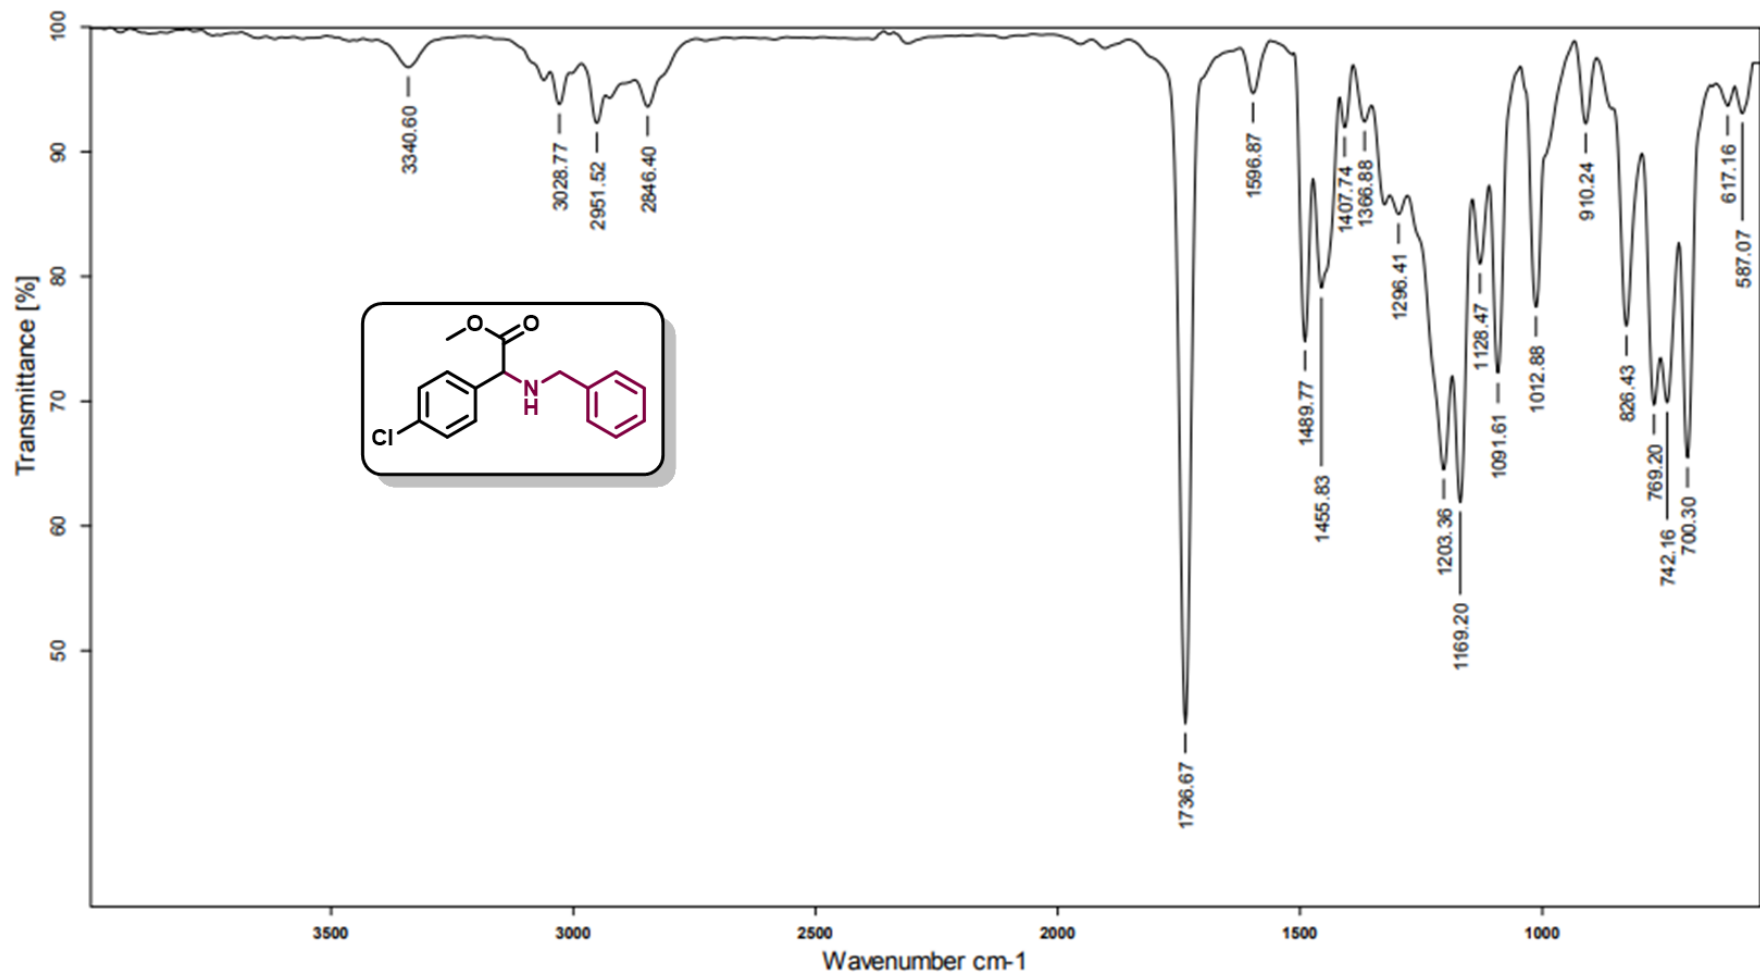

Fig. S136. IR spectra of methyl 2-(benzylamino)-2-(4-chlorophenyl)acetate (**8b**).

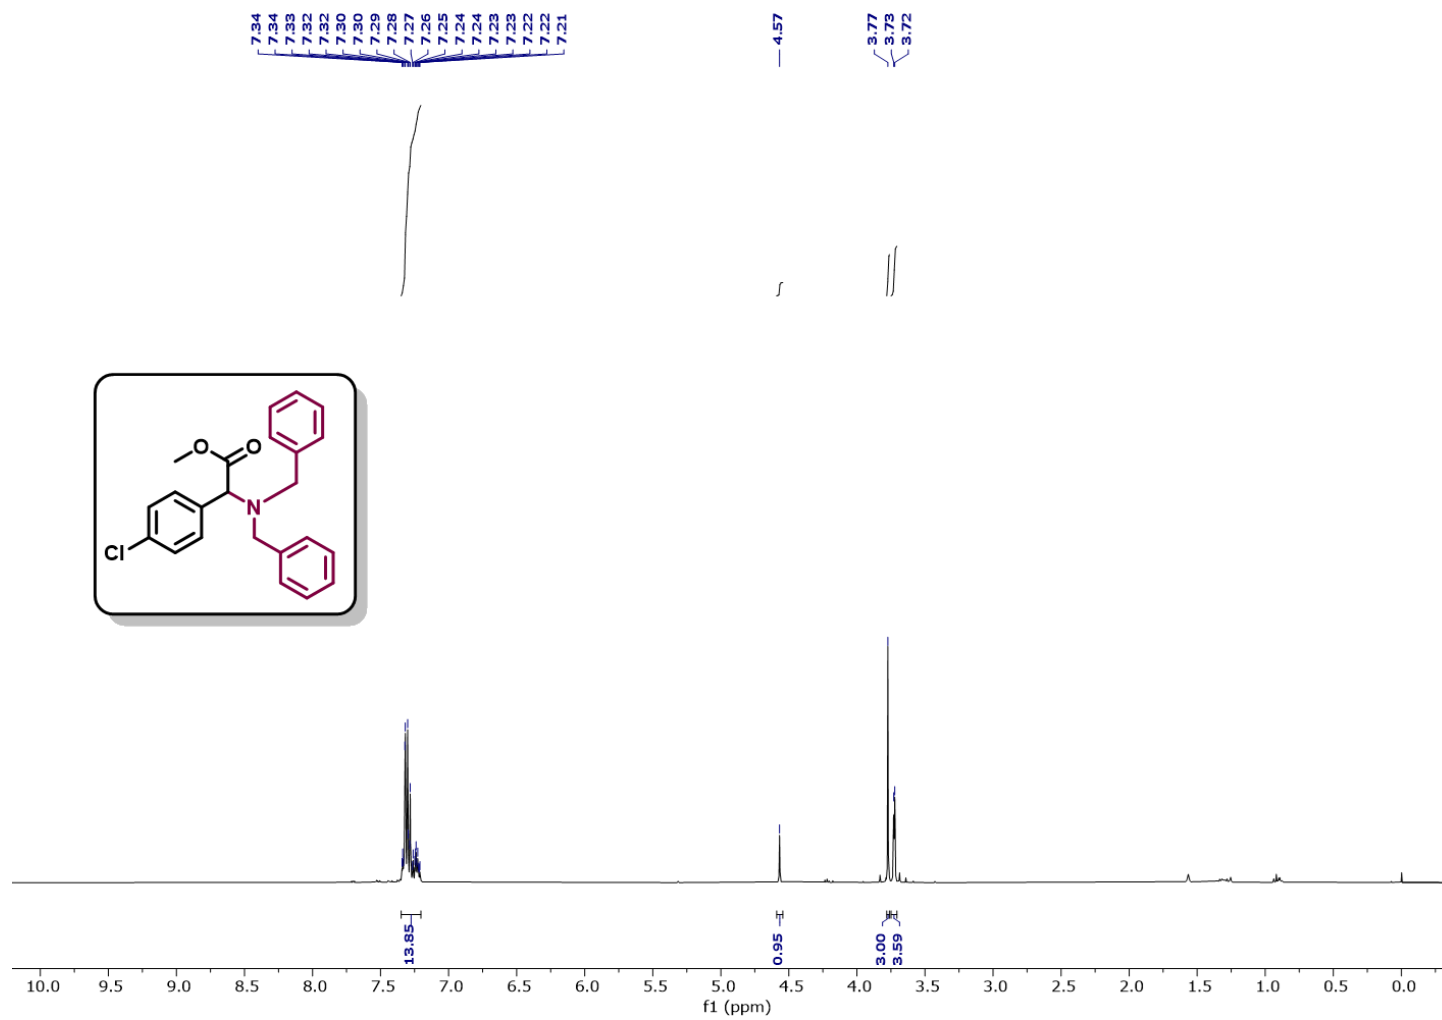

**Fig. S137.** <sup>1</sup>H NMR (400 MHz, CDCl<sub>3</sub>) spectra of methyl 2-(4-chlorophenyl)-2-(dibenzylamino)acetate (**8c**).

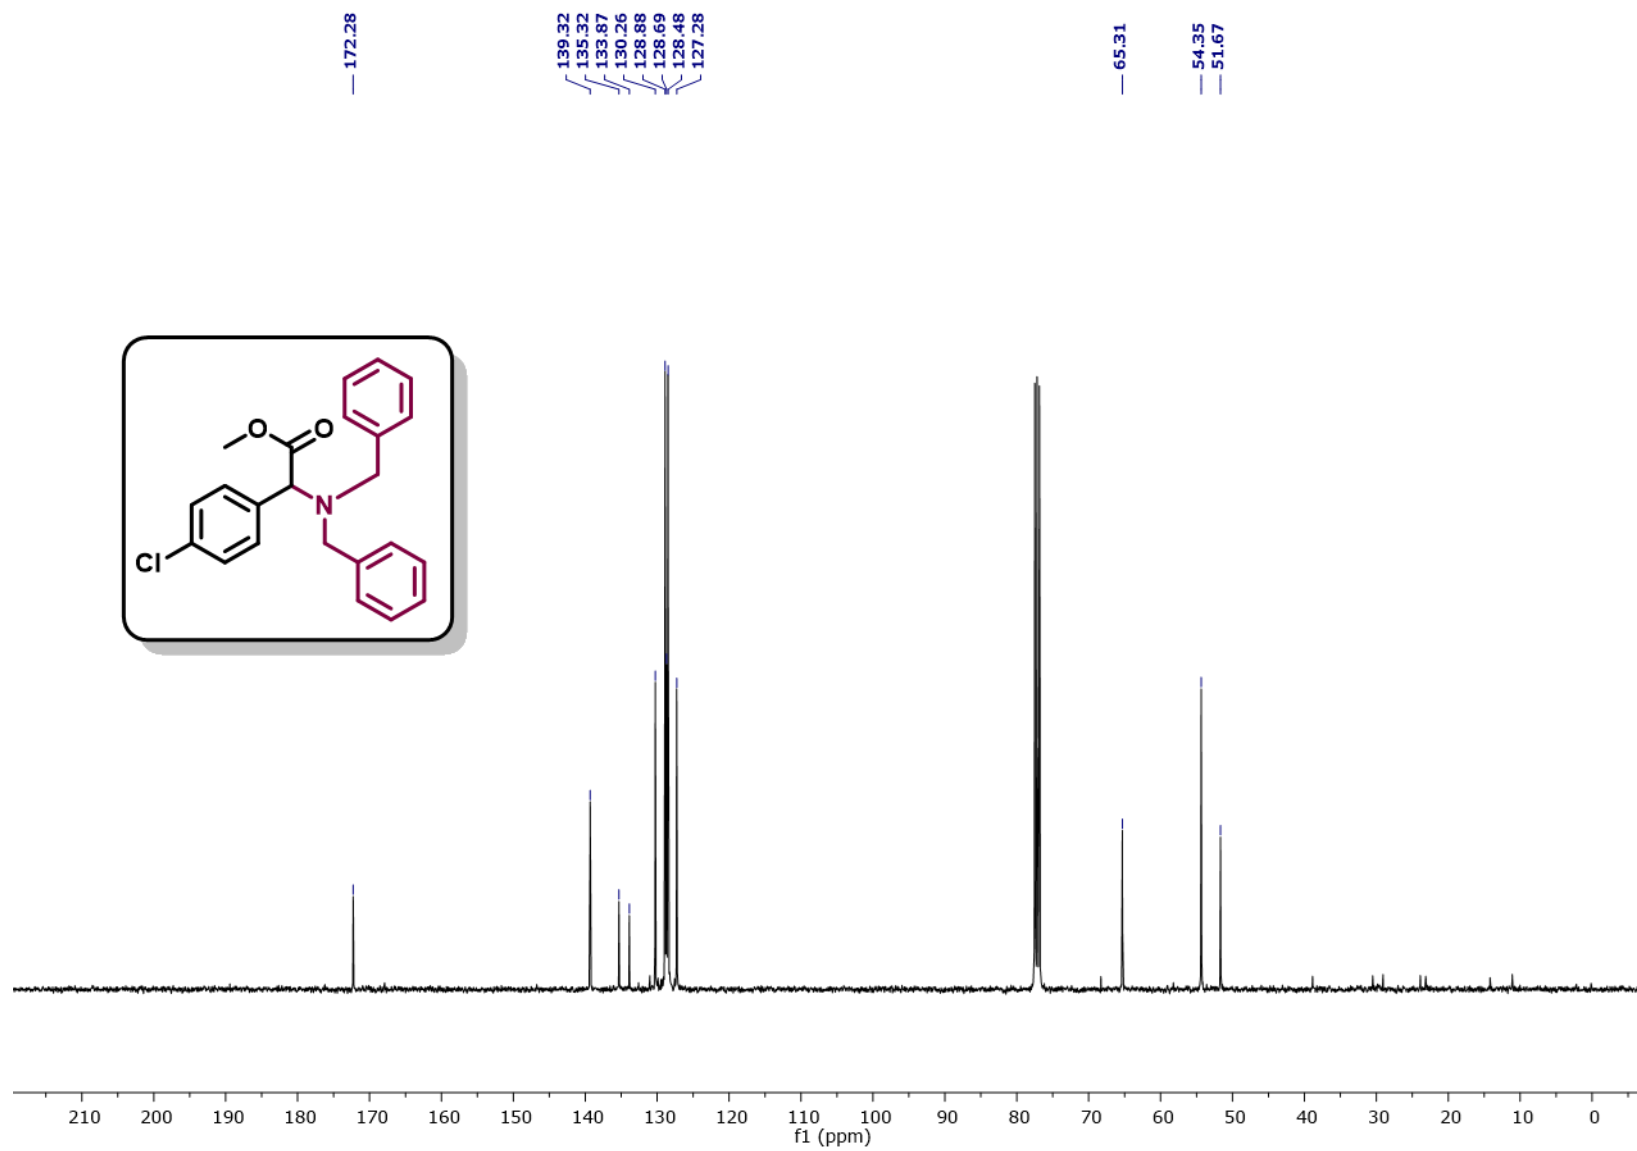

**Fig. S138.**  $^{13}\text{C}$  NMR (101 MHz,  $\text{CDCl}_3$ ) spectra of methyl 2-(4-chlorophenyl)-2-(dibenzylamino)acetate (**8c**).

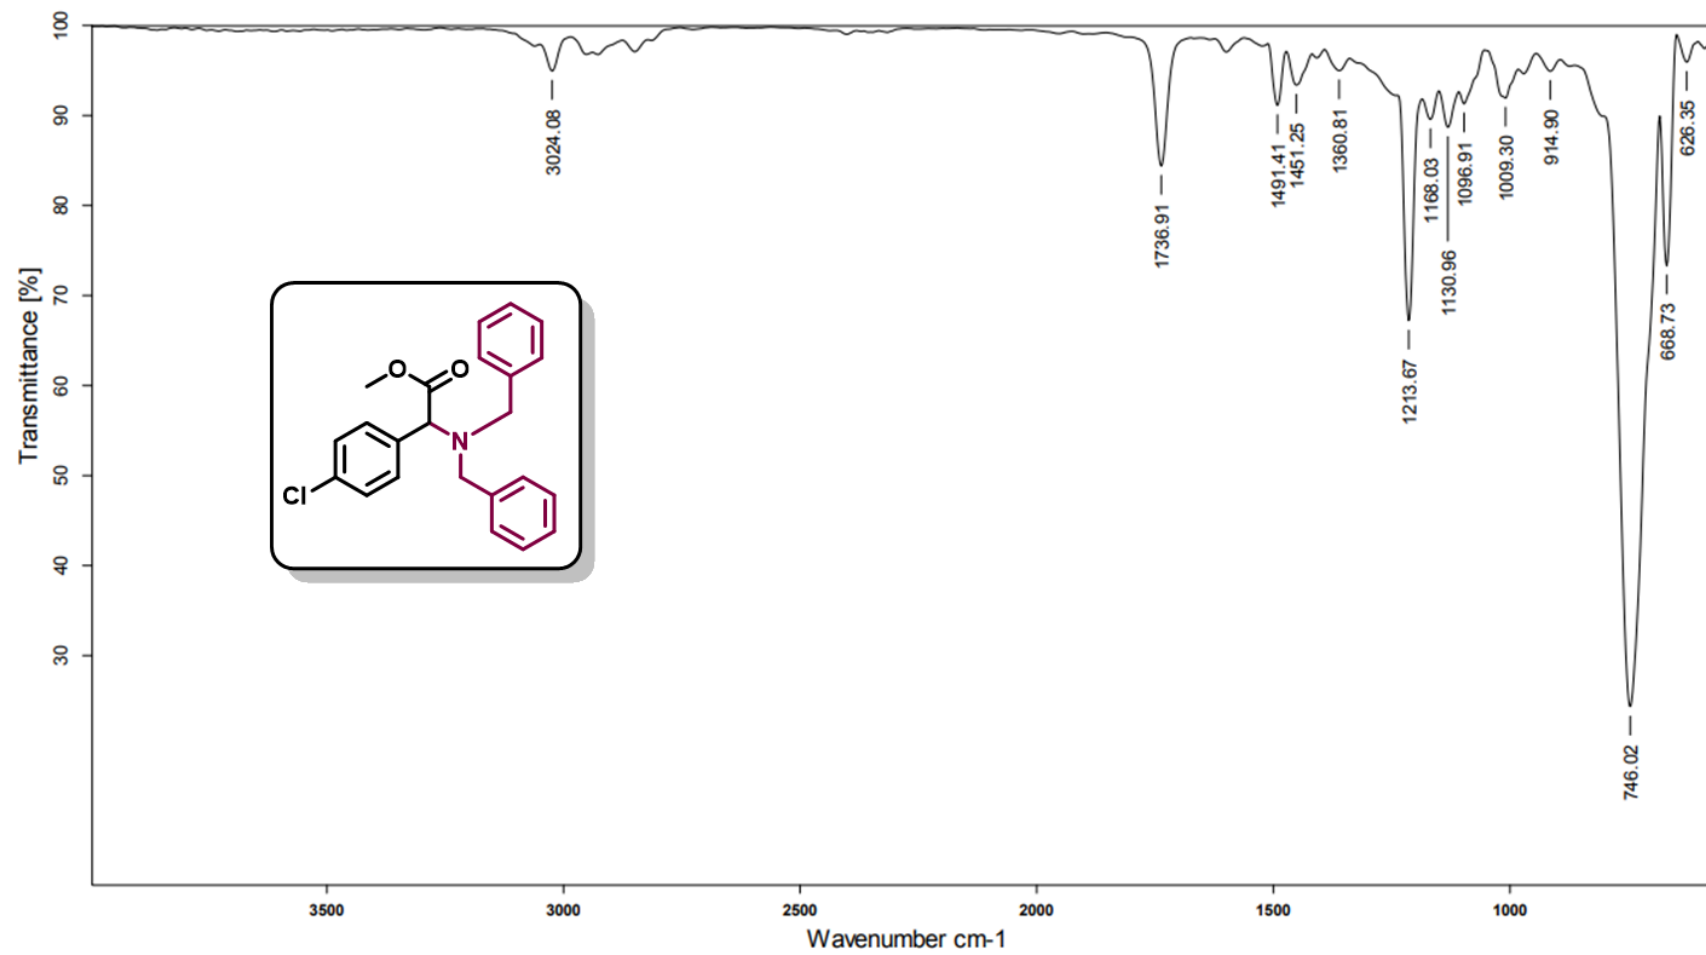

**Fig. S139.** IR spectra of methyl 2-(4-chlorophenyl)-2-(dibenzylamino)acetate (**8c**).

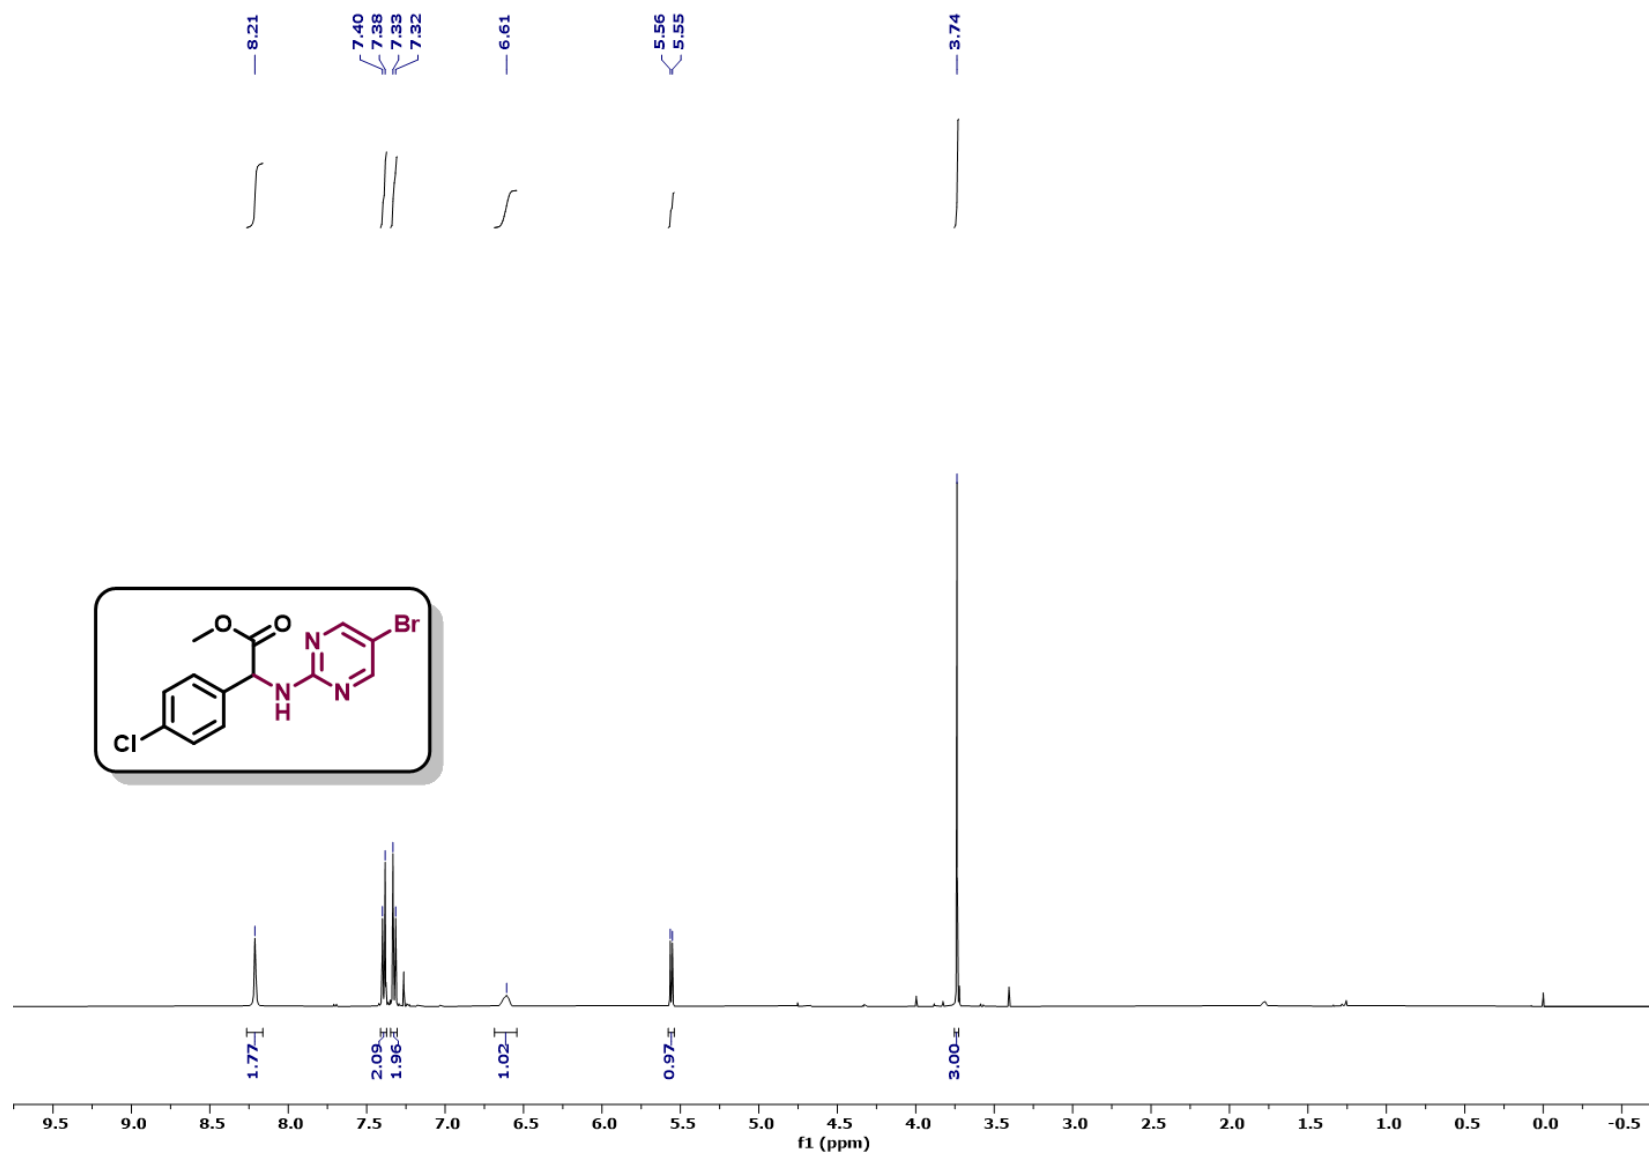

**Fig. S140.** <sup>1</sup>H NMR (500 MHz, CDCl<sub>3</sub>) spectra of methyl 2-((5-bromopyrimidin-2-yl)amino)-2-(4-chlorophenyl)acetate (**8d**).

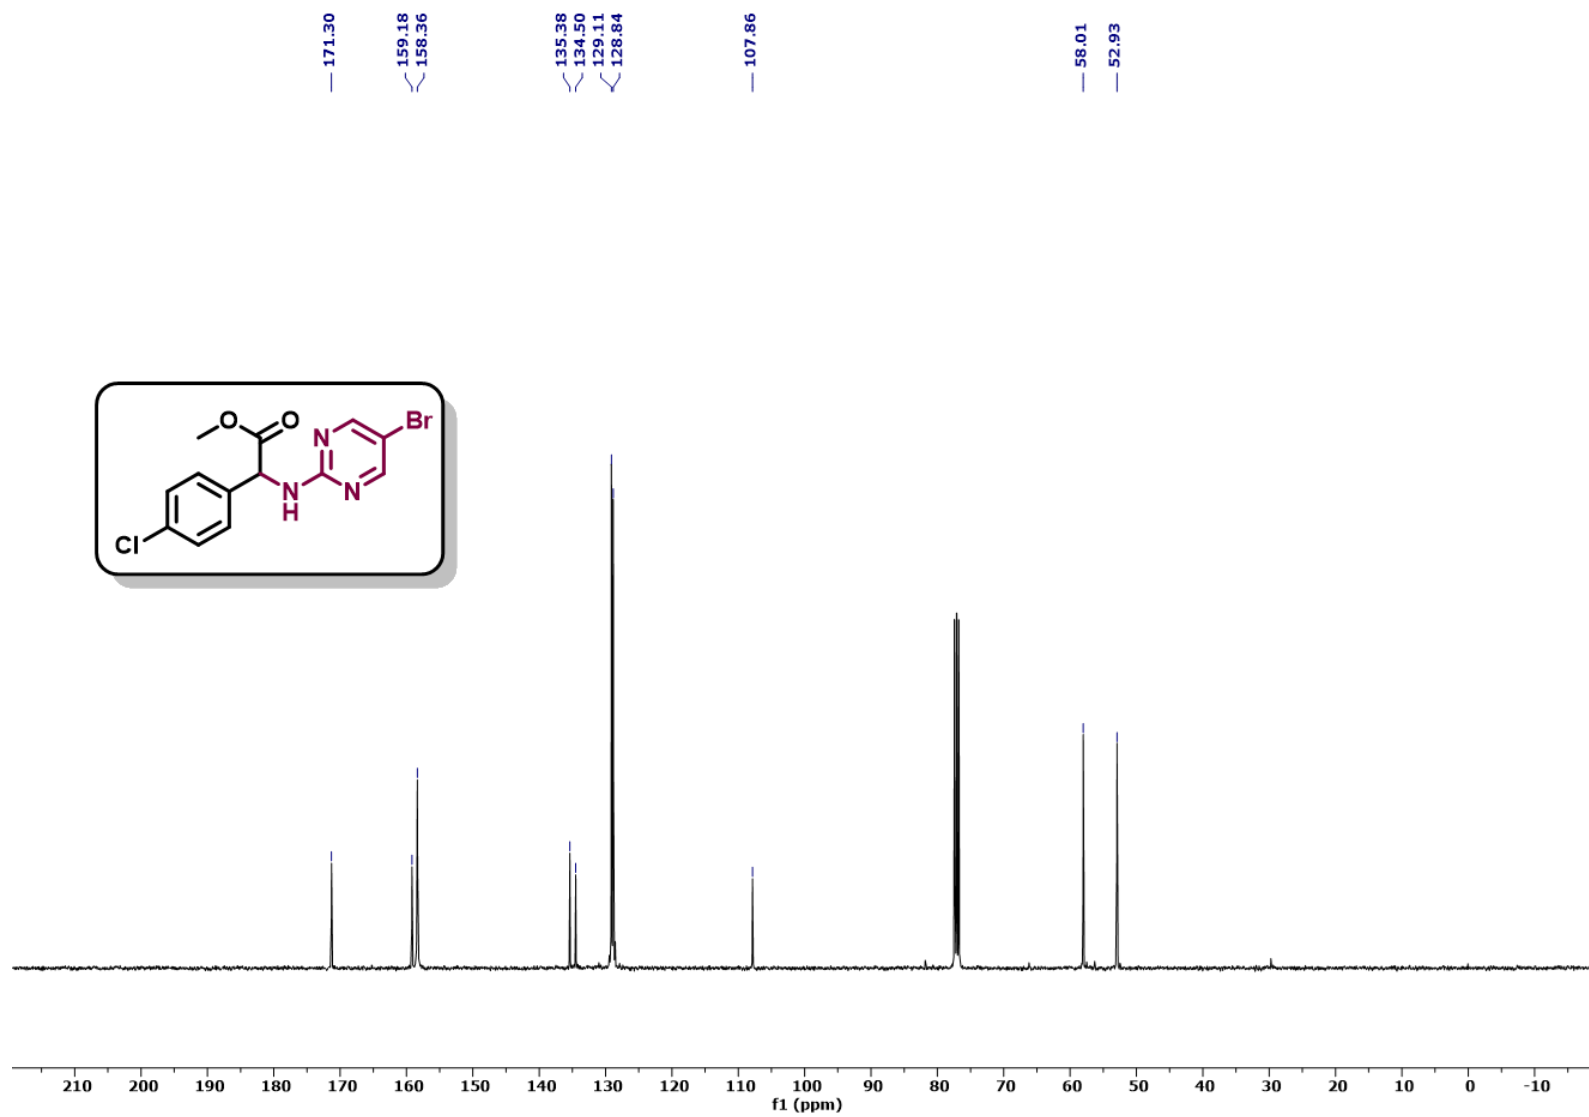

**Fig. S141.** <sup>13</sup>C NMR (101 MHz, CDCl<sub>3</sub>) spectra of methyl 2-((5-bromopyrimidin-2-yl)amino)-2-(4-chlorophenyl)acetate (**8d**).

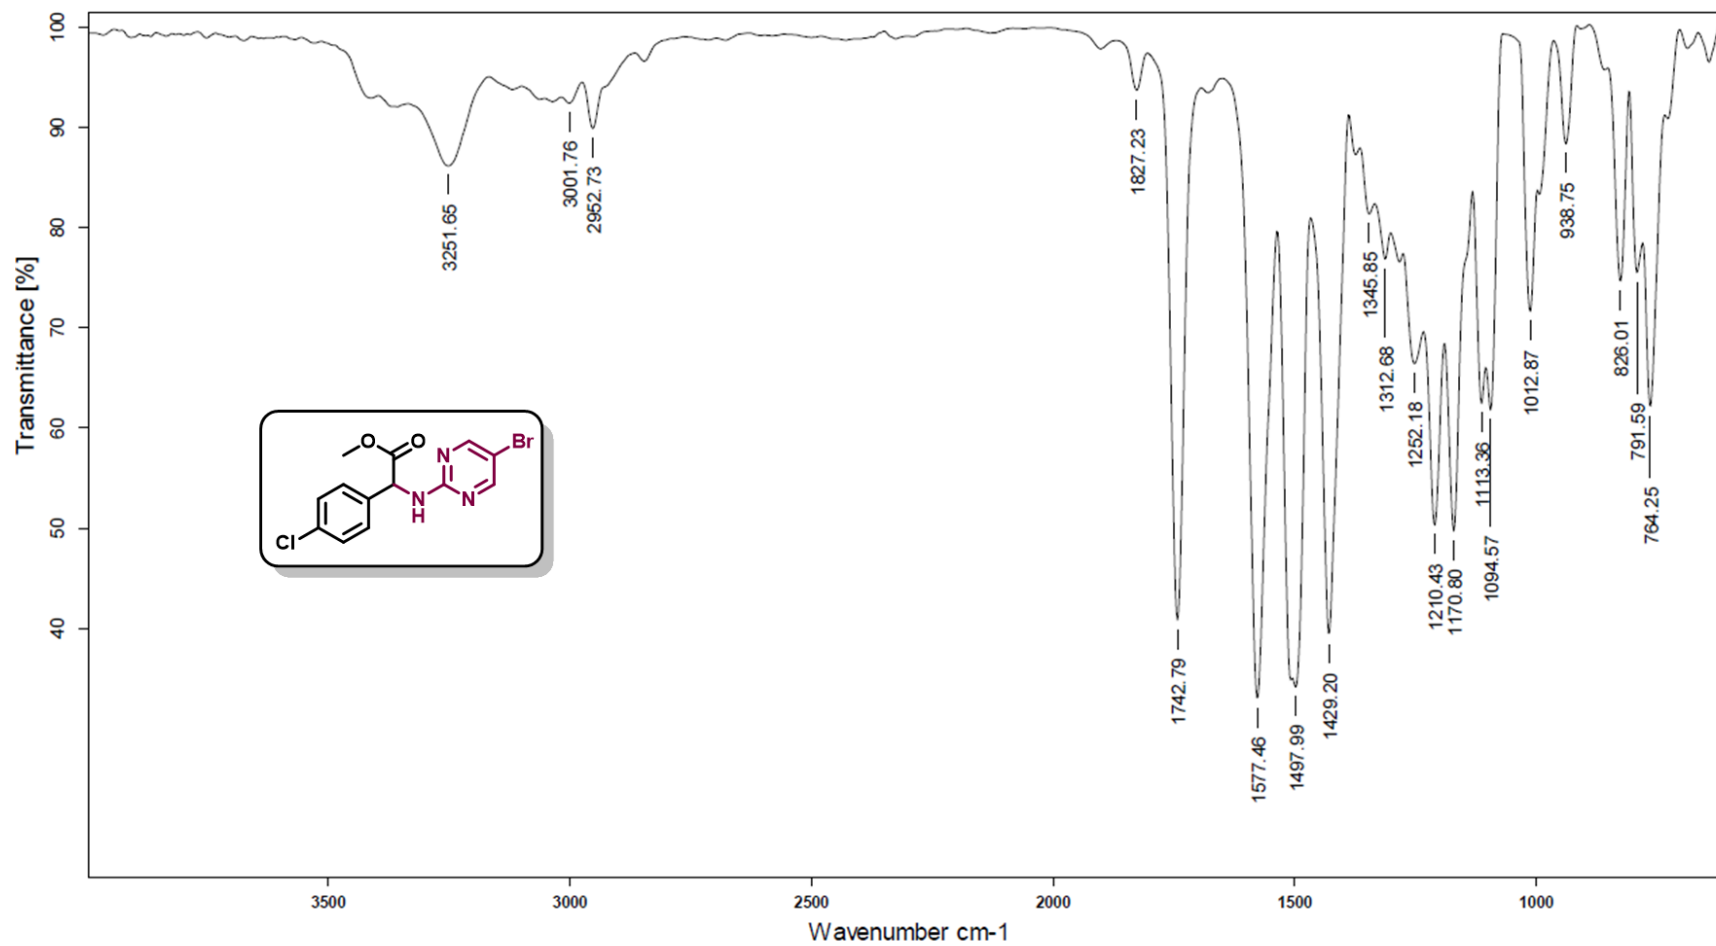

**Fig. S142.** IR spectra of methyl 2-((5-bromopyrimidin-2-yl)amino)-2-(4-chlorophenyl)acetate (**8d**).

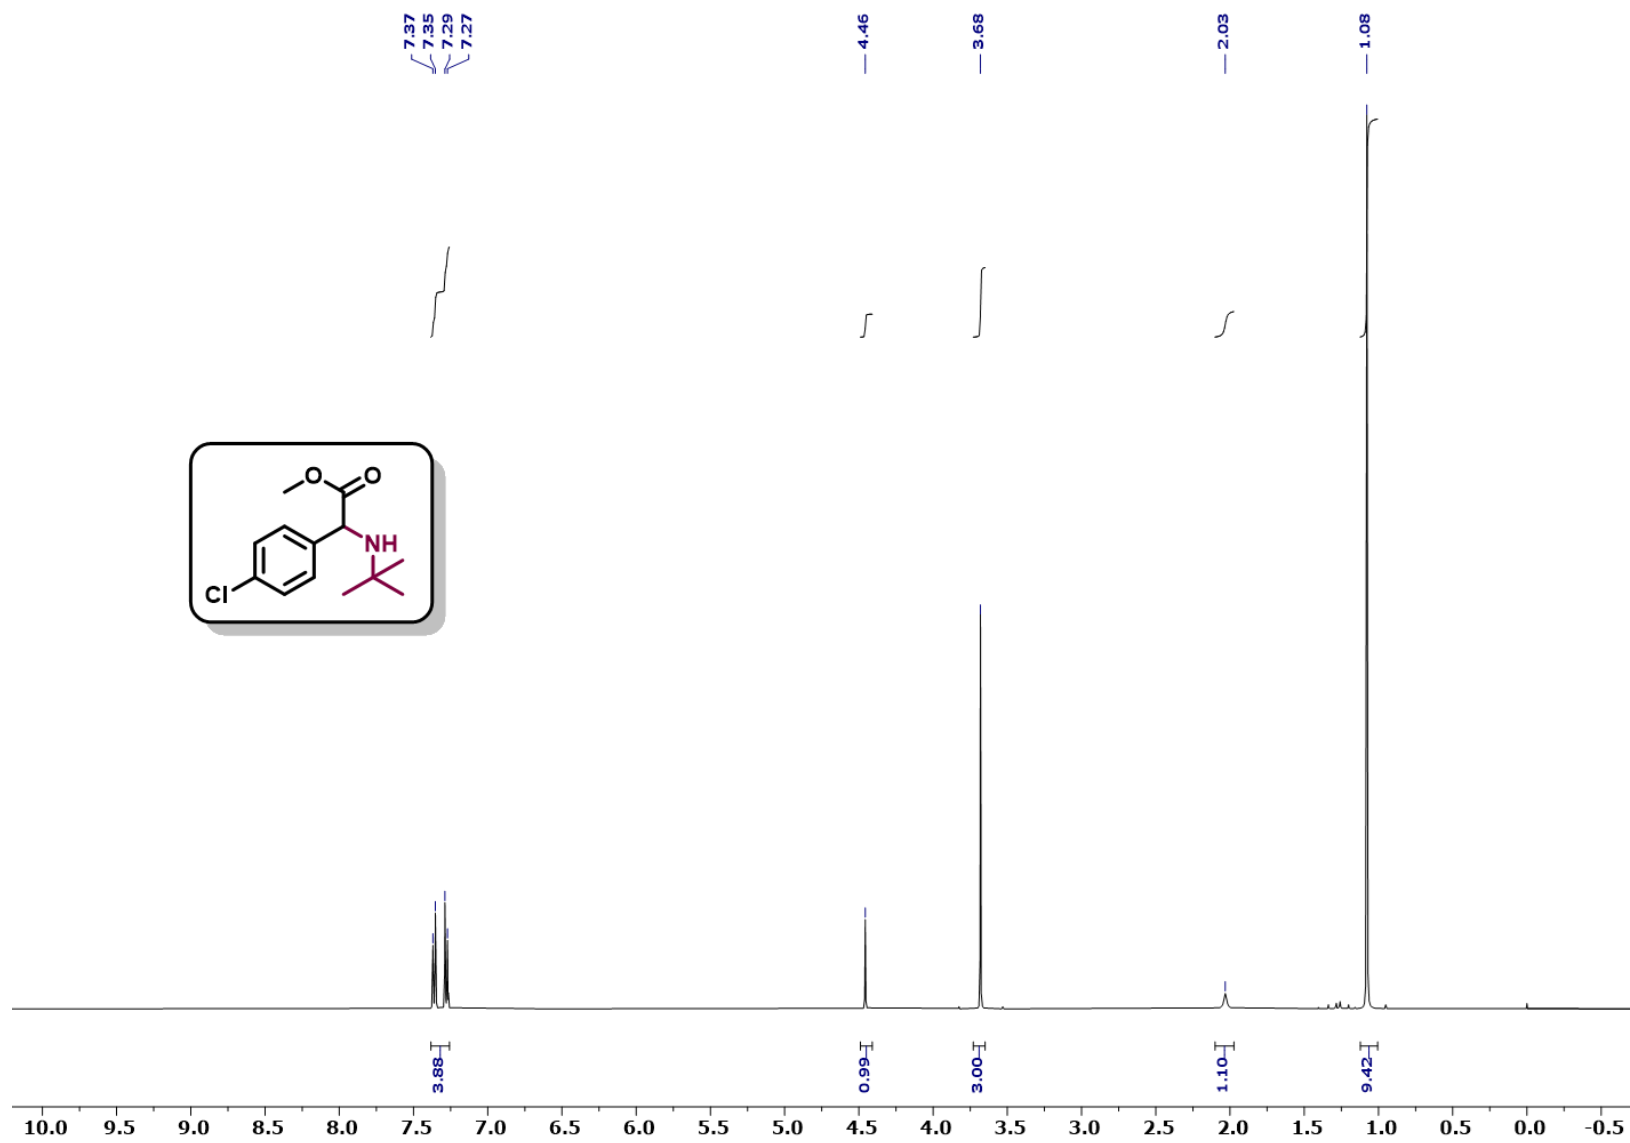

**Fig. S143.** <sup>1</sup>H NMR (500 MHz, CDCl<sub>3</sub>) spectra of methyl 2-(tert-butylamino)-2-(4-chlorophenyl)acetate (**8e**).



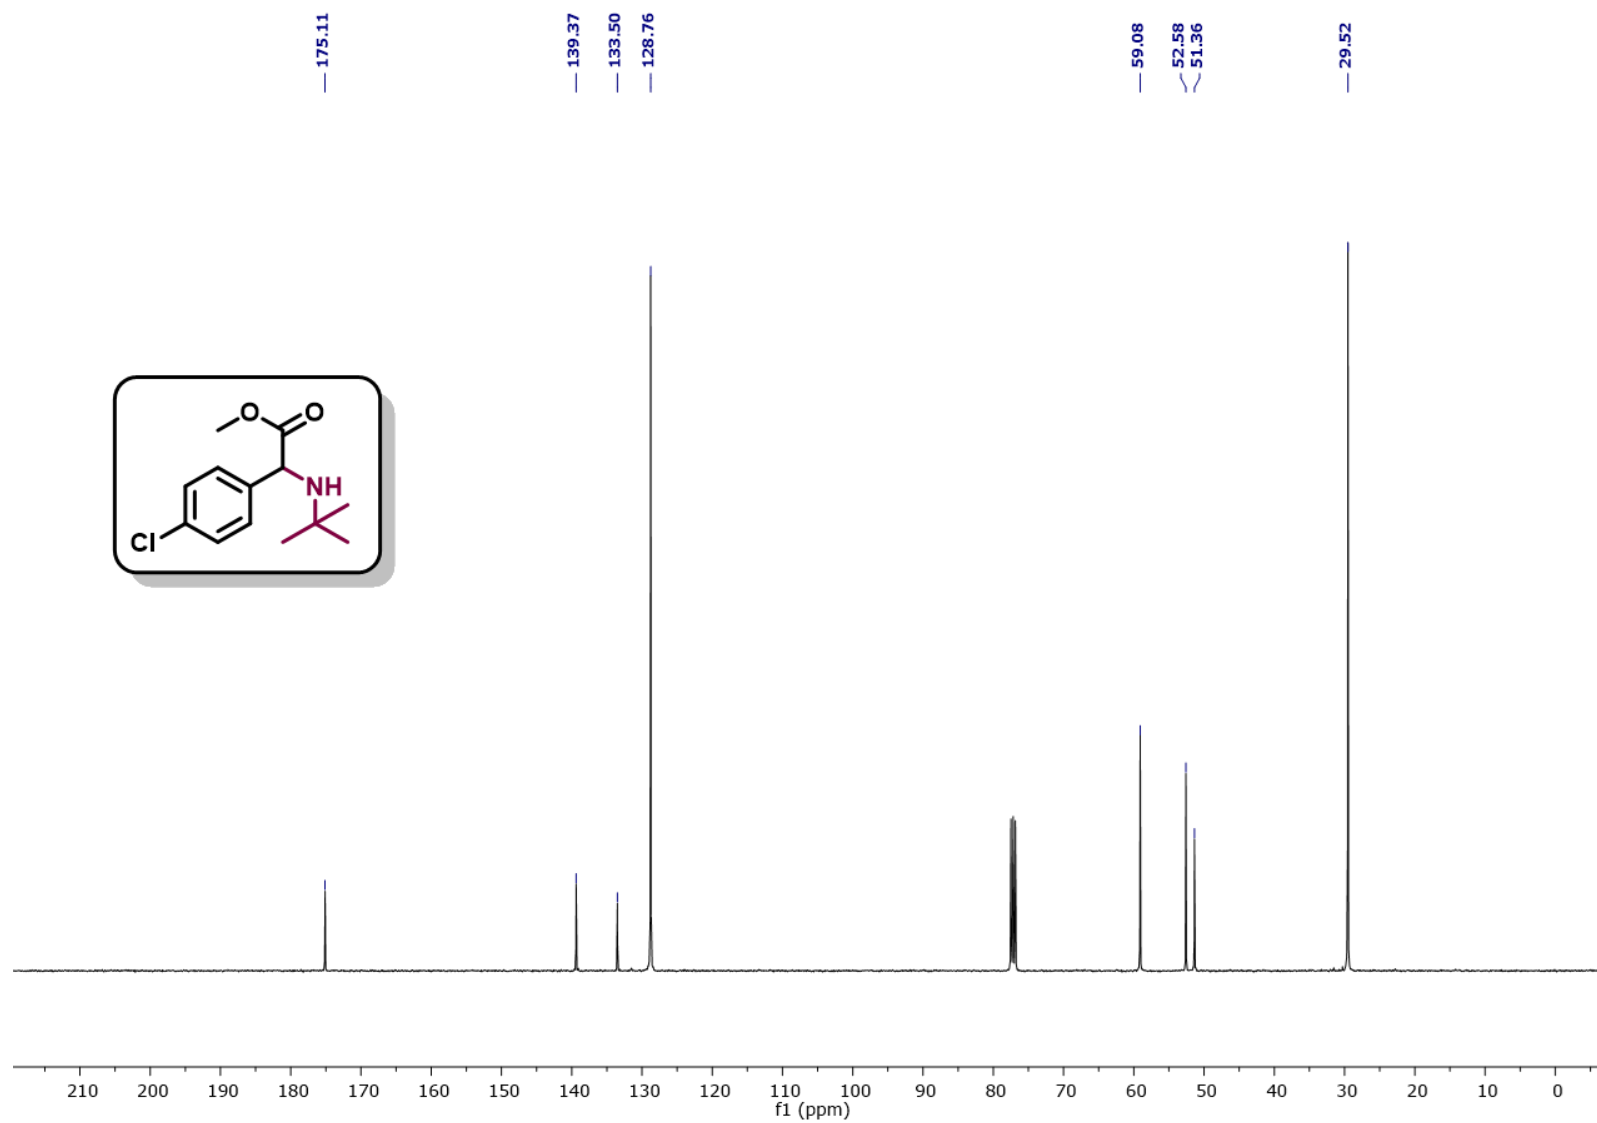

**Fig. S144.** <sup>13</sup>C NMR (101 MHz, CDCl<sub>3</sub>) spectra of methyl 2-(tert-butylamino)-2-(4-chlorophenyl)acetate (**8e**).

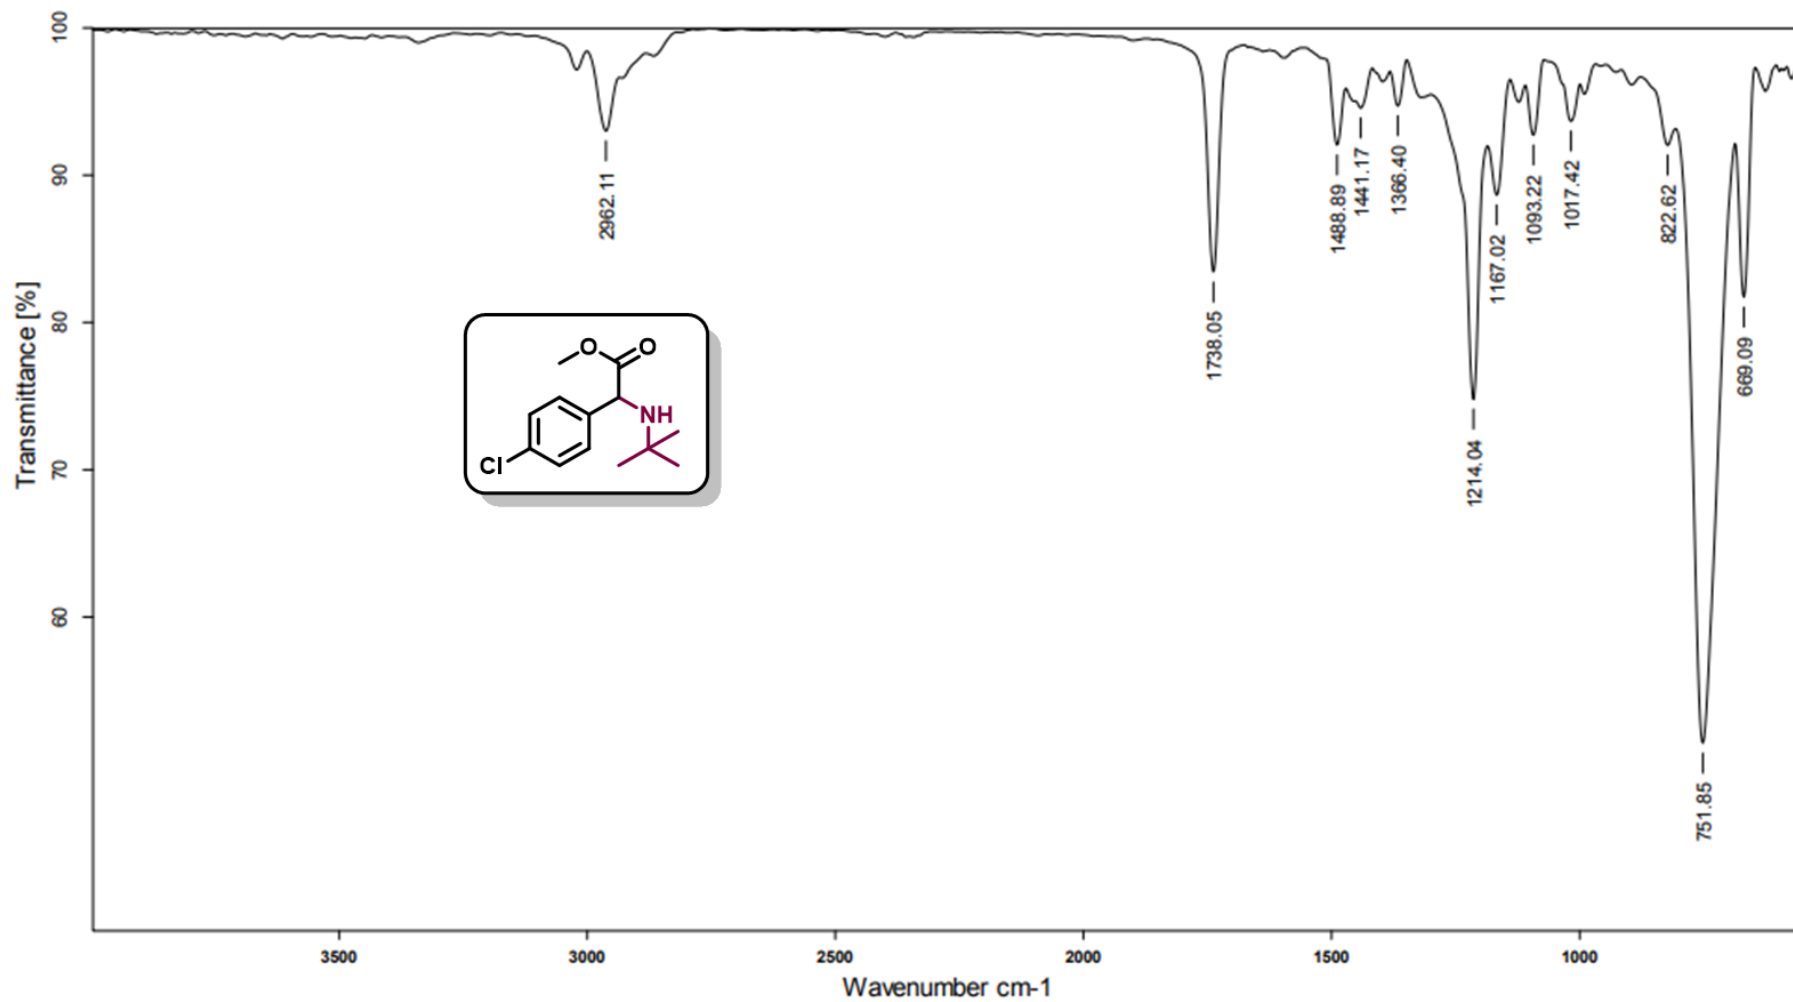

**Fig. S145.** IR spectra of methyl 2-(tert-butylamino)-2-(4-chlorophenyl)acetate (**8e**).

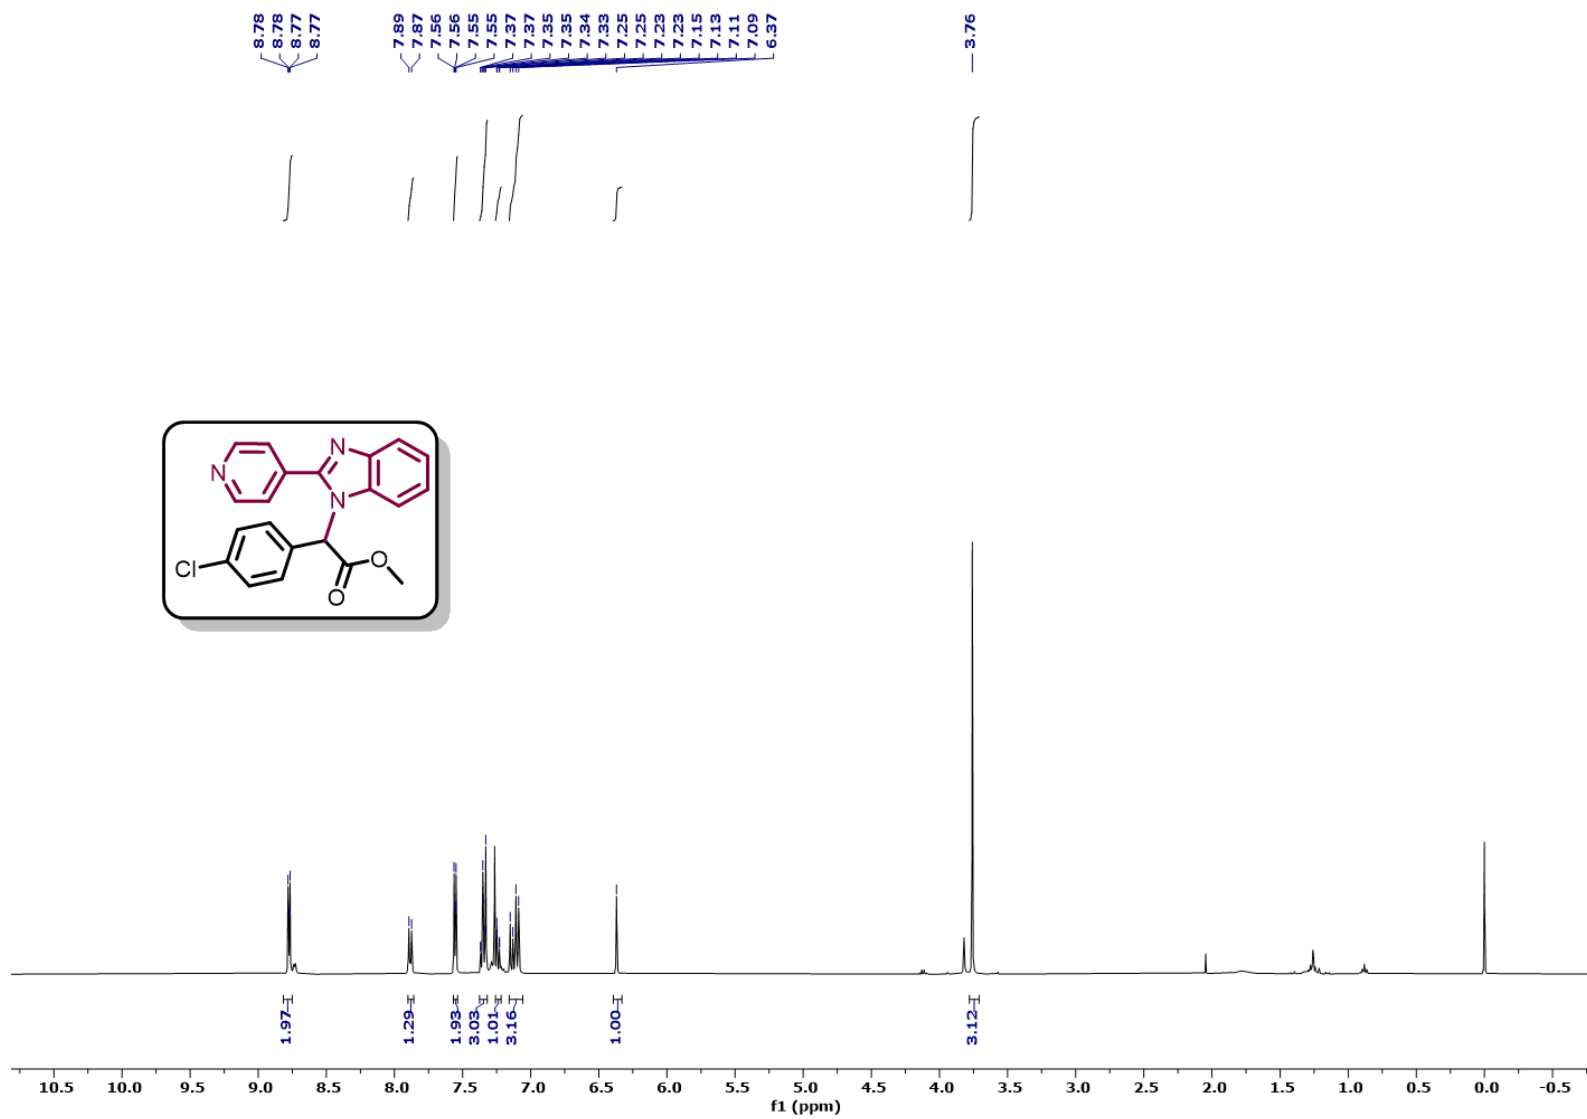

**Fig. S146.** <sup>1</sup>H NMR (400 MHz, CDCl<sub>3</sub>) spectra of methyl 2-(4-chlorophenyl)-2-(2-(pyridin-4-yl)-1H-benzo[d]imidazol-1-yl)acetate (**8f**).

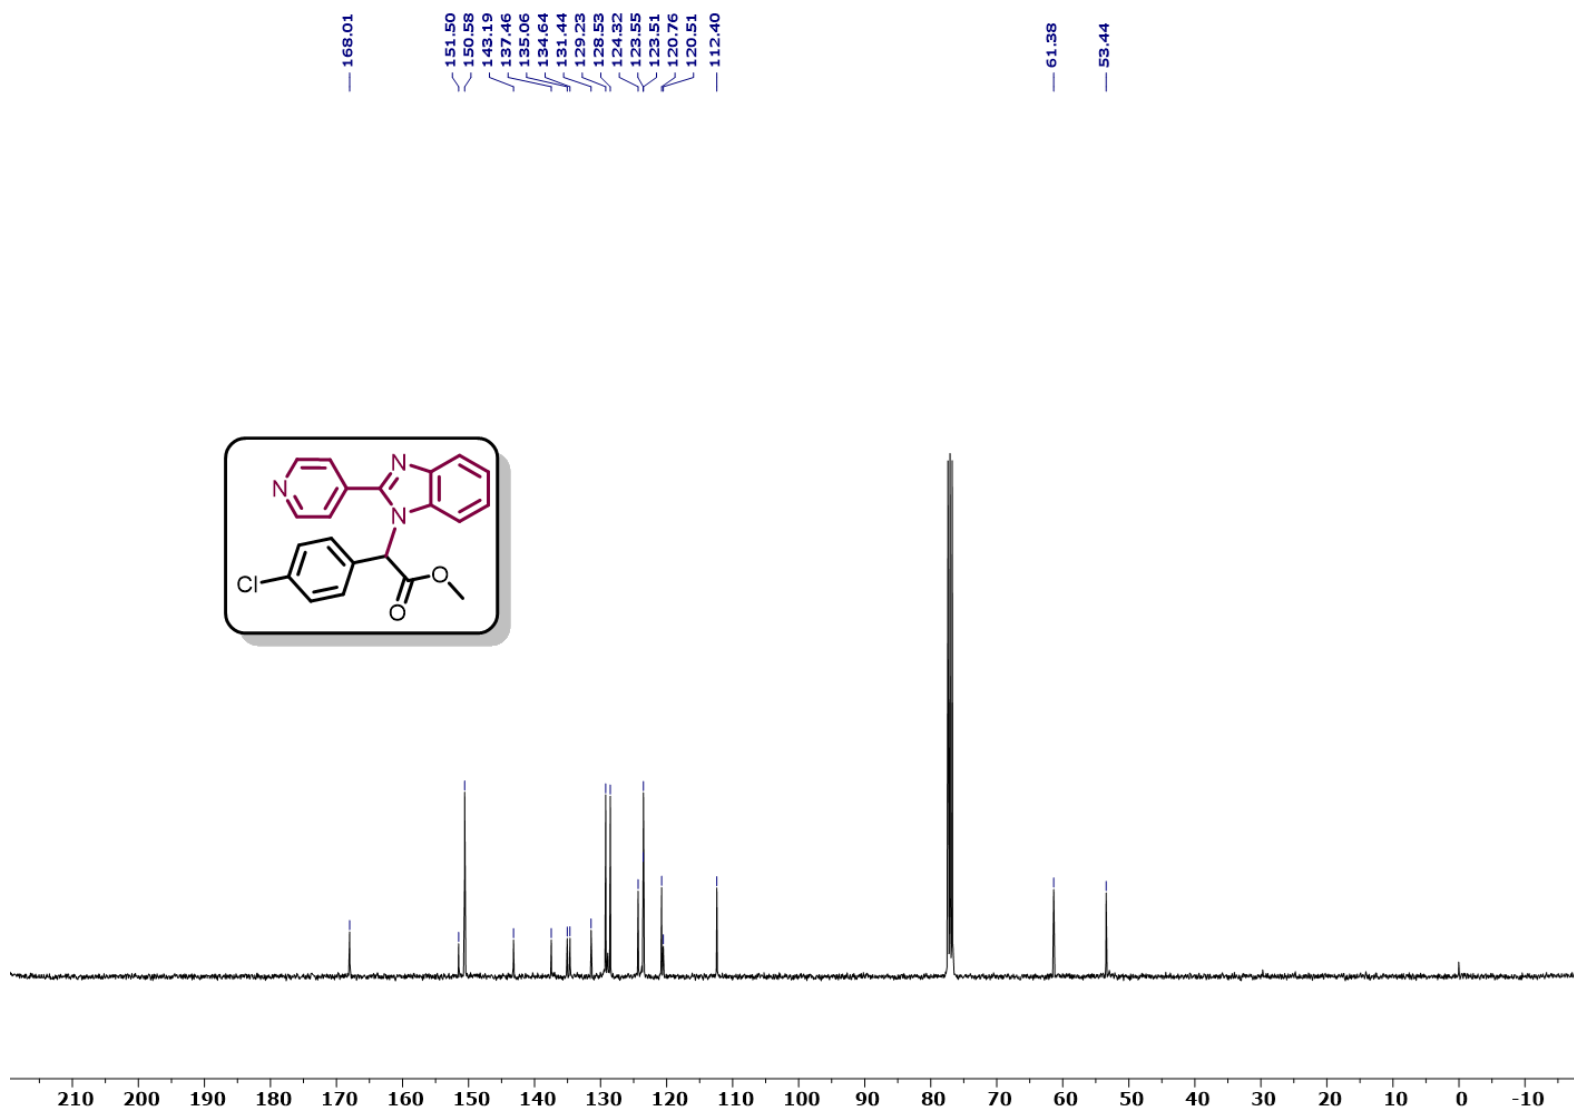

**Fig. S147.** <sup>13</sup>C NMR (101 MHz, CDCl<sub>3</sub>) spectra of methyl 2-(4-chlorophenyl)-2-(2-(pyridin-4-yl)-1H-benzo[d]imidazol-1-yl)acetate (**8f**).

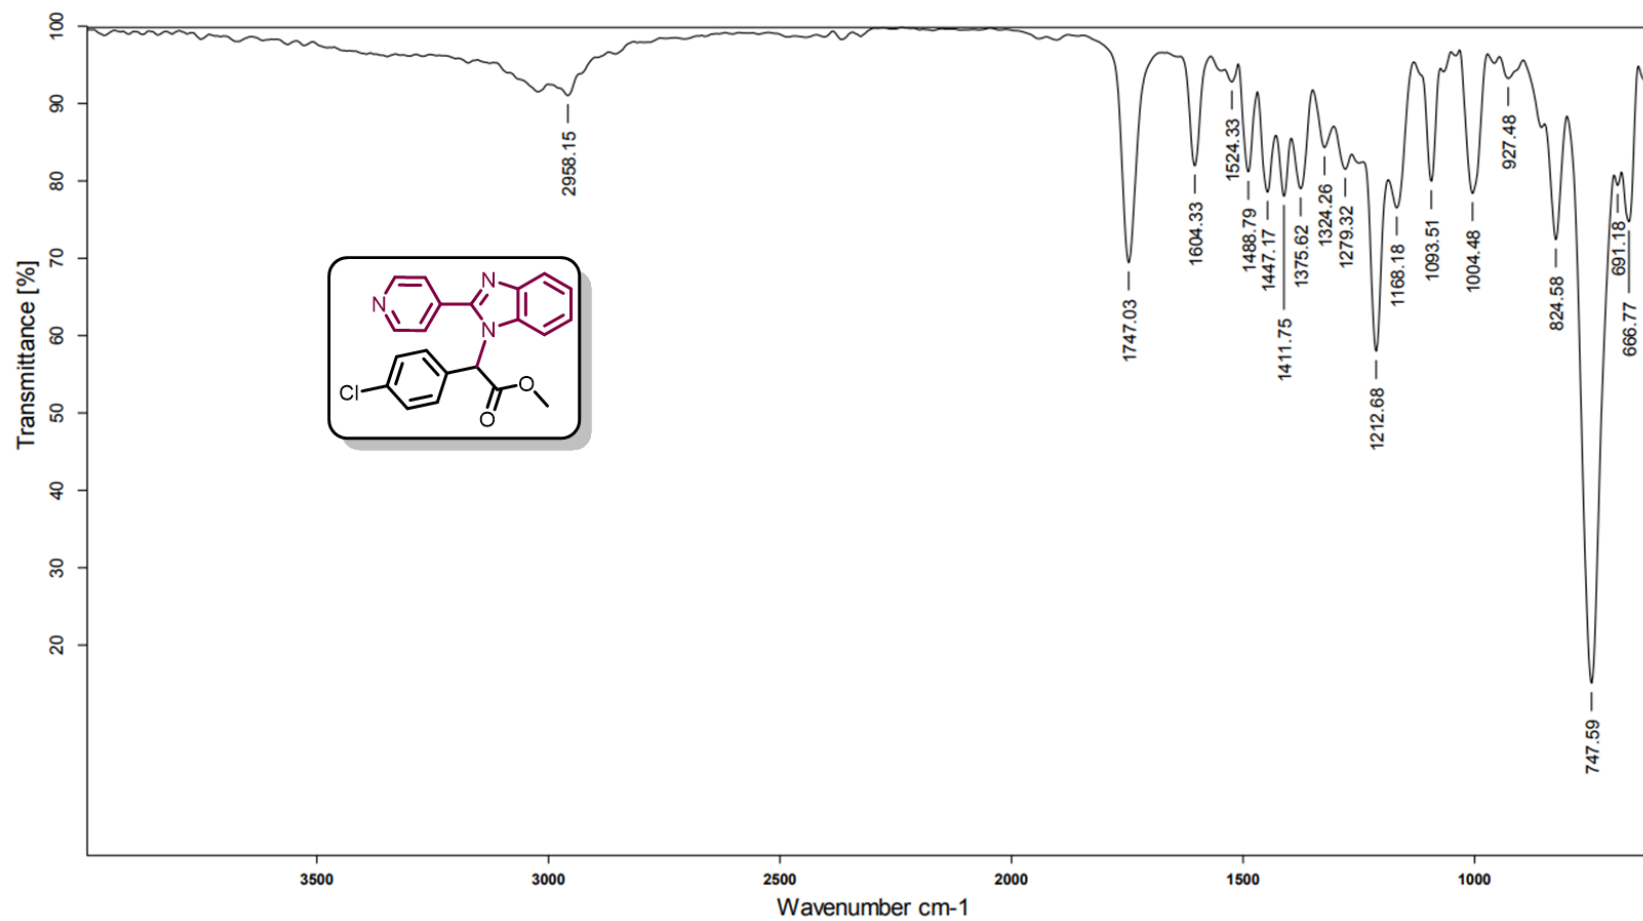

**Fig. S148.** IR spectra of methyl 2-(4-chlorophenyl)-2-(2-(pyridin-4-yl)-1H-benzo[d]imidazol-1-yl)acetate (**8f**).

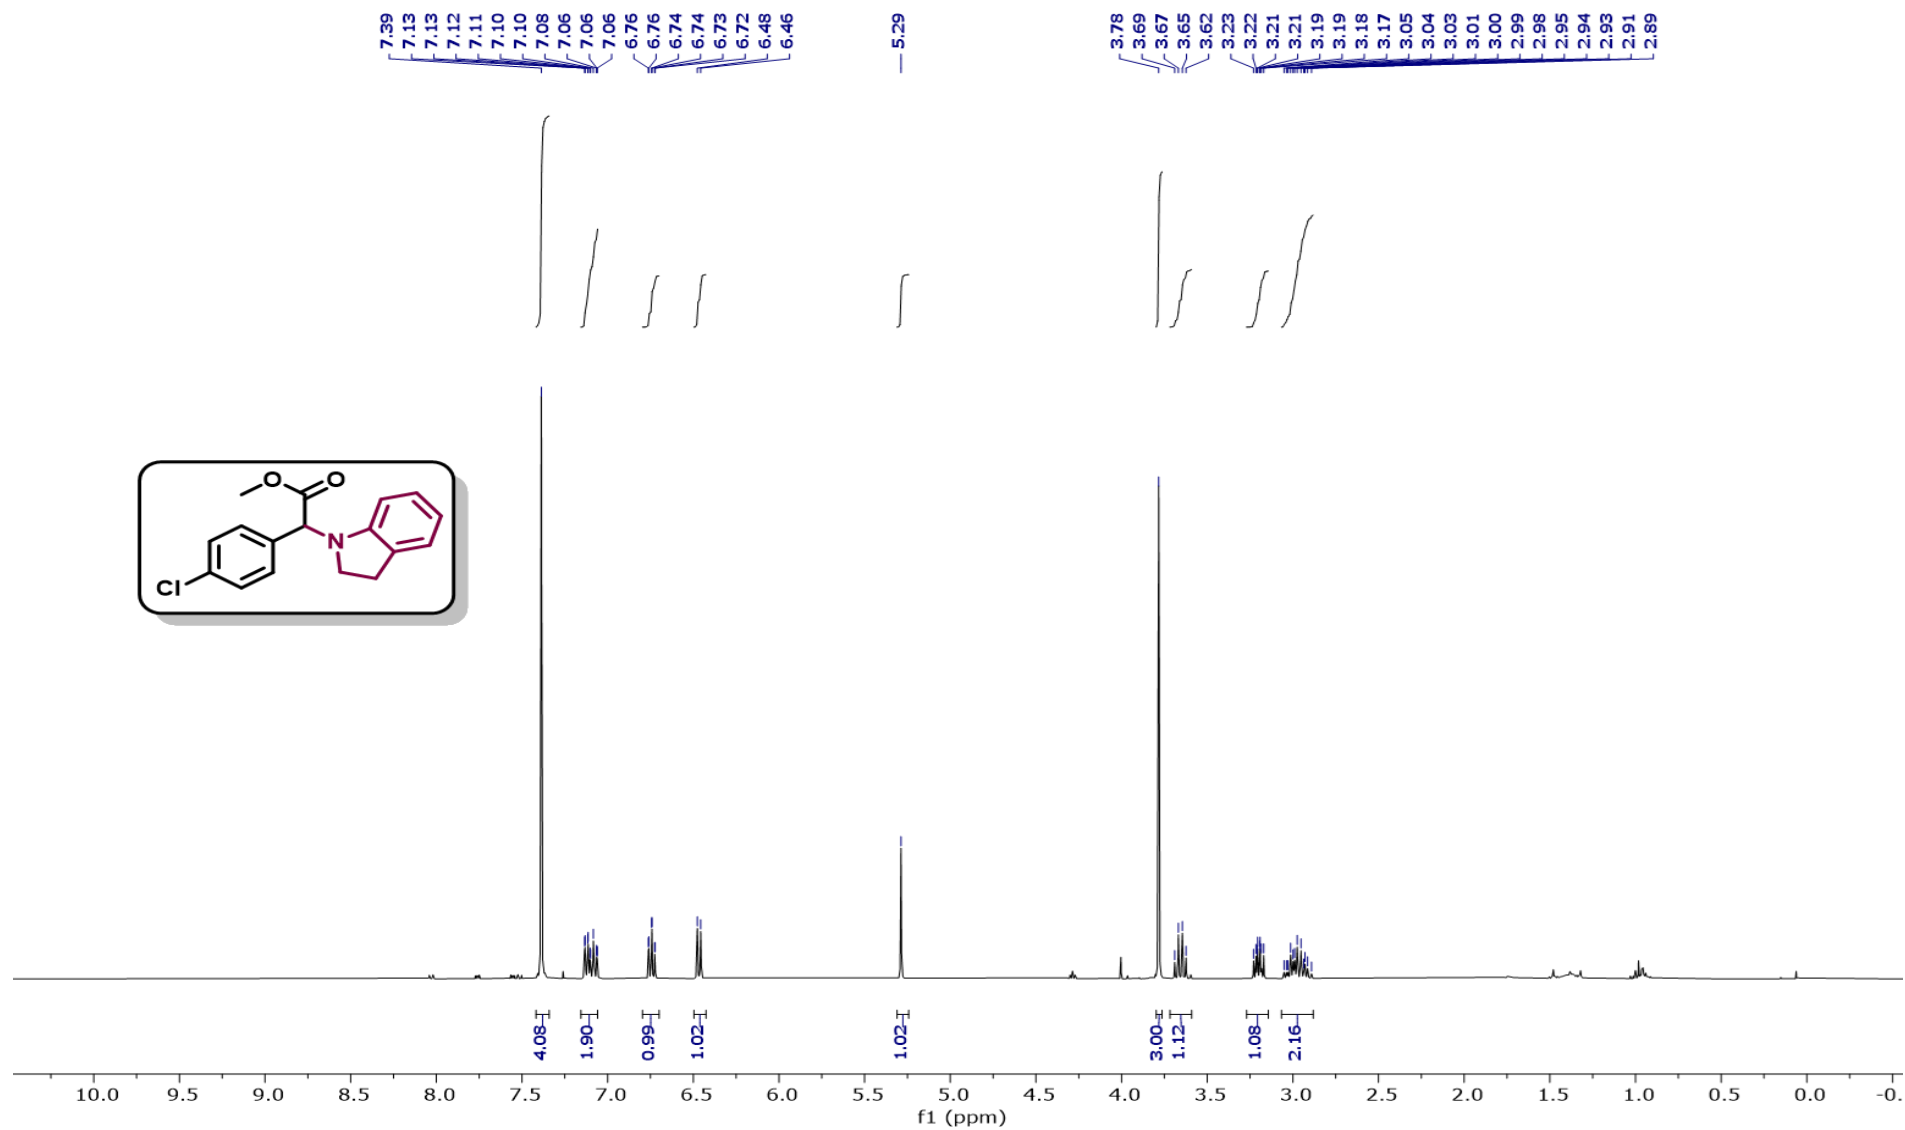

**Fig. S149.** <sup>1</sup>H NMR (400 MHz, CDCl<sub>3</sub>) spectra of methyl 2-(4-chlorophenyl)-2-(indolin-1-yl)acetate (**8g**).

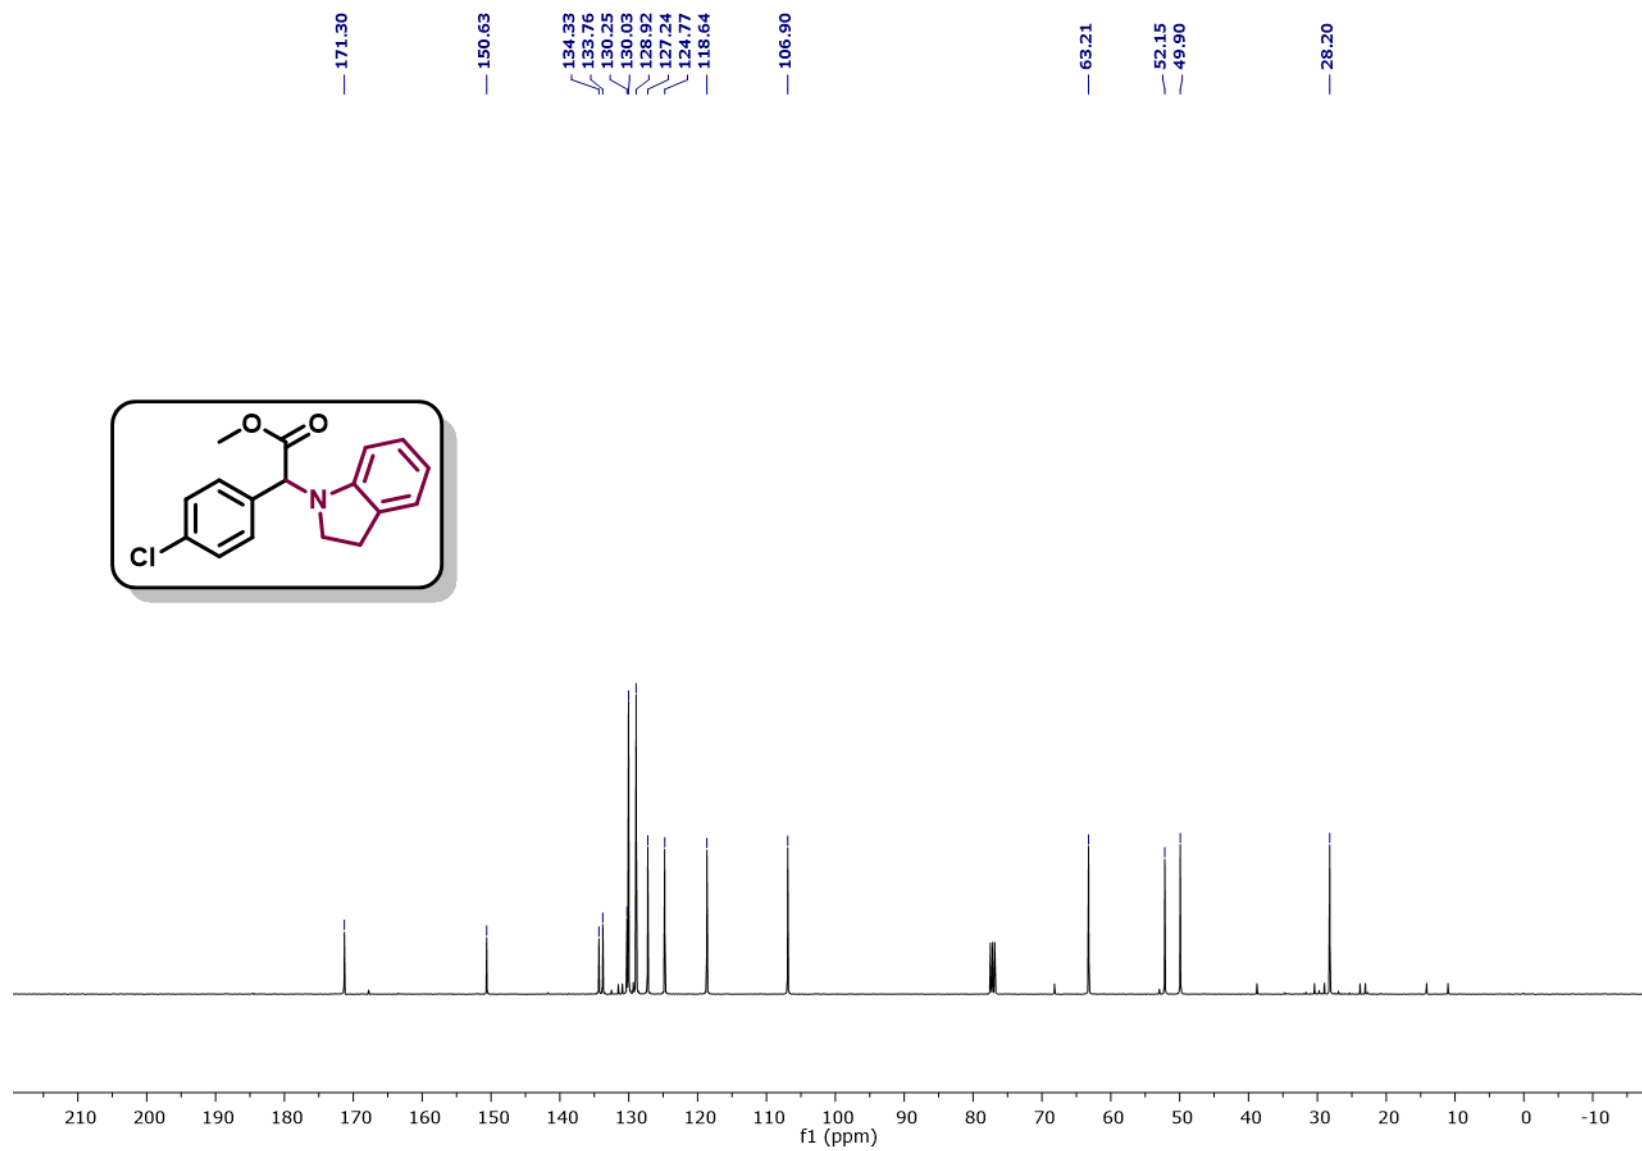

**Fig. S150.**  $^{13}\text{C}$  NMR (101 MHz,  $\text{CDCl}_3$ ) spectra of methyl 2-(4-chlorophenyl)-2-(indolin-1-yl)acetate (**8g**).

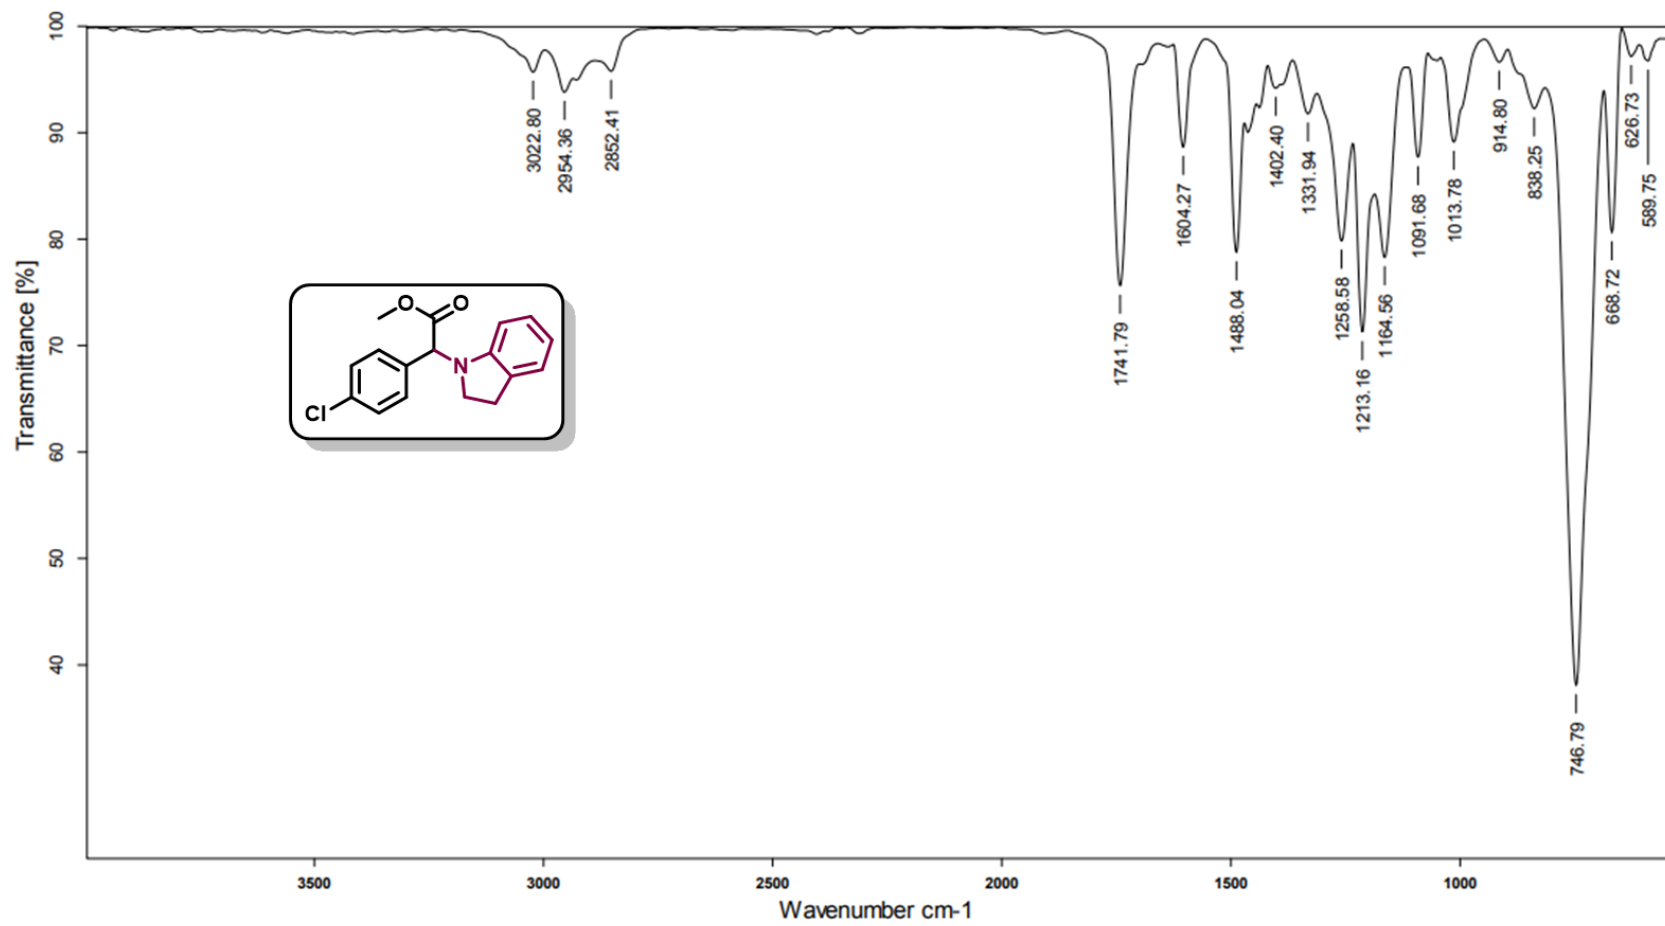

**Fig. S151.** IR spectra of methyl 2-(4-chlorophenyl)-2-(indolin-1-yl)acetate (**8g**).



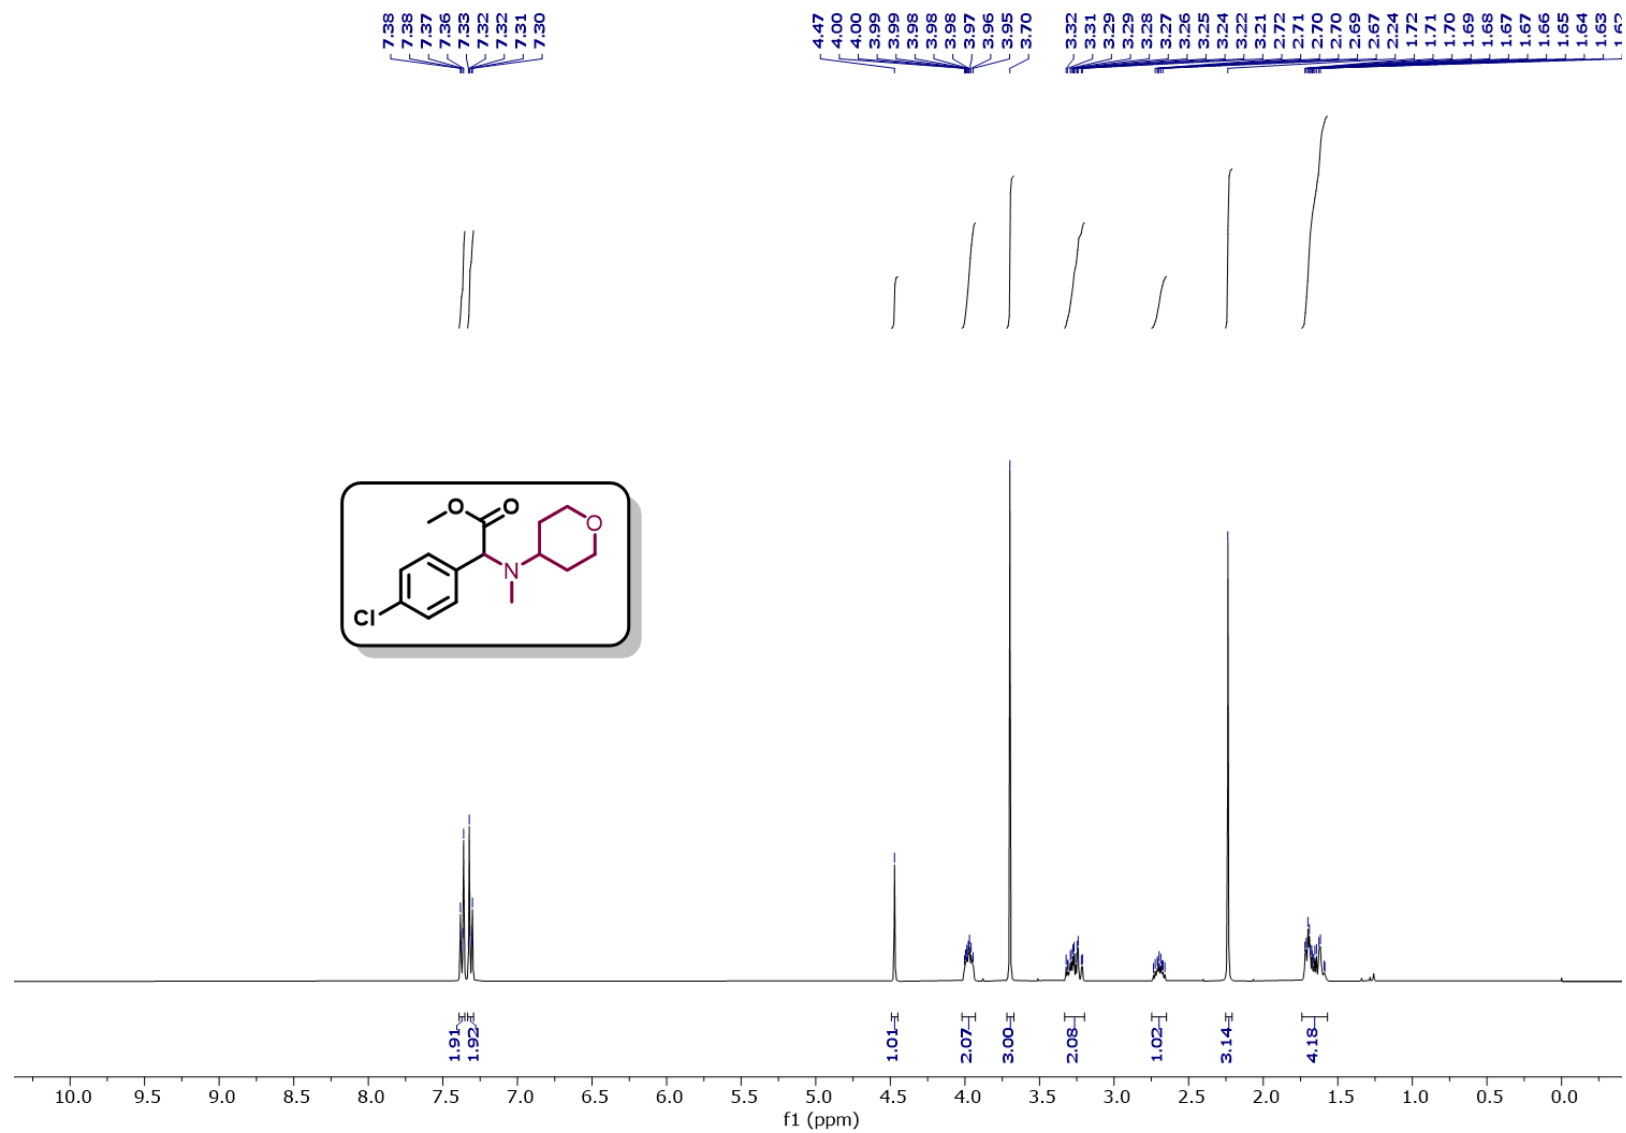

**Fig. S152.** <sup>1</sup>H NMR (400 MHz, CDCl<sub>3</sub>) spectra of methyl 2-(4-chlorophenyl)-2-(methyl(tetrahydro-2H-pyran-4-yl)amino)acetate (**8h**).

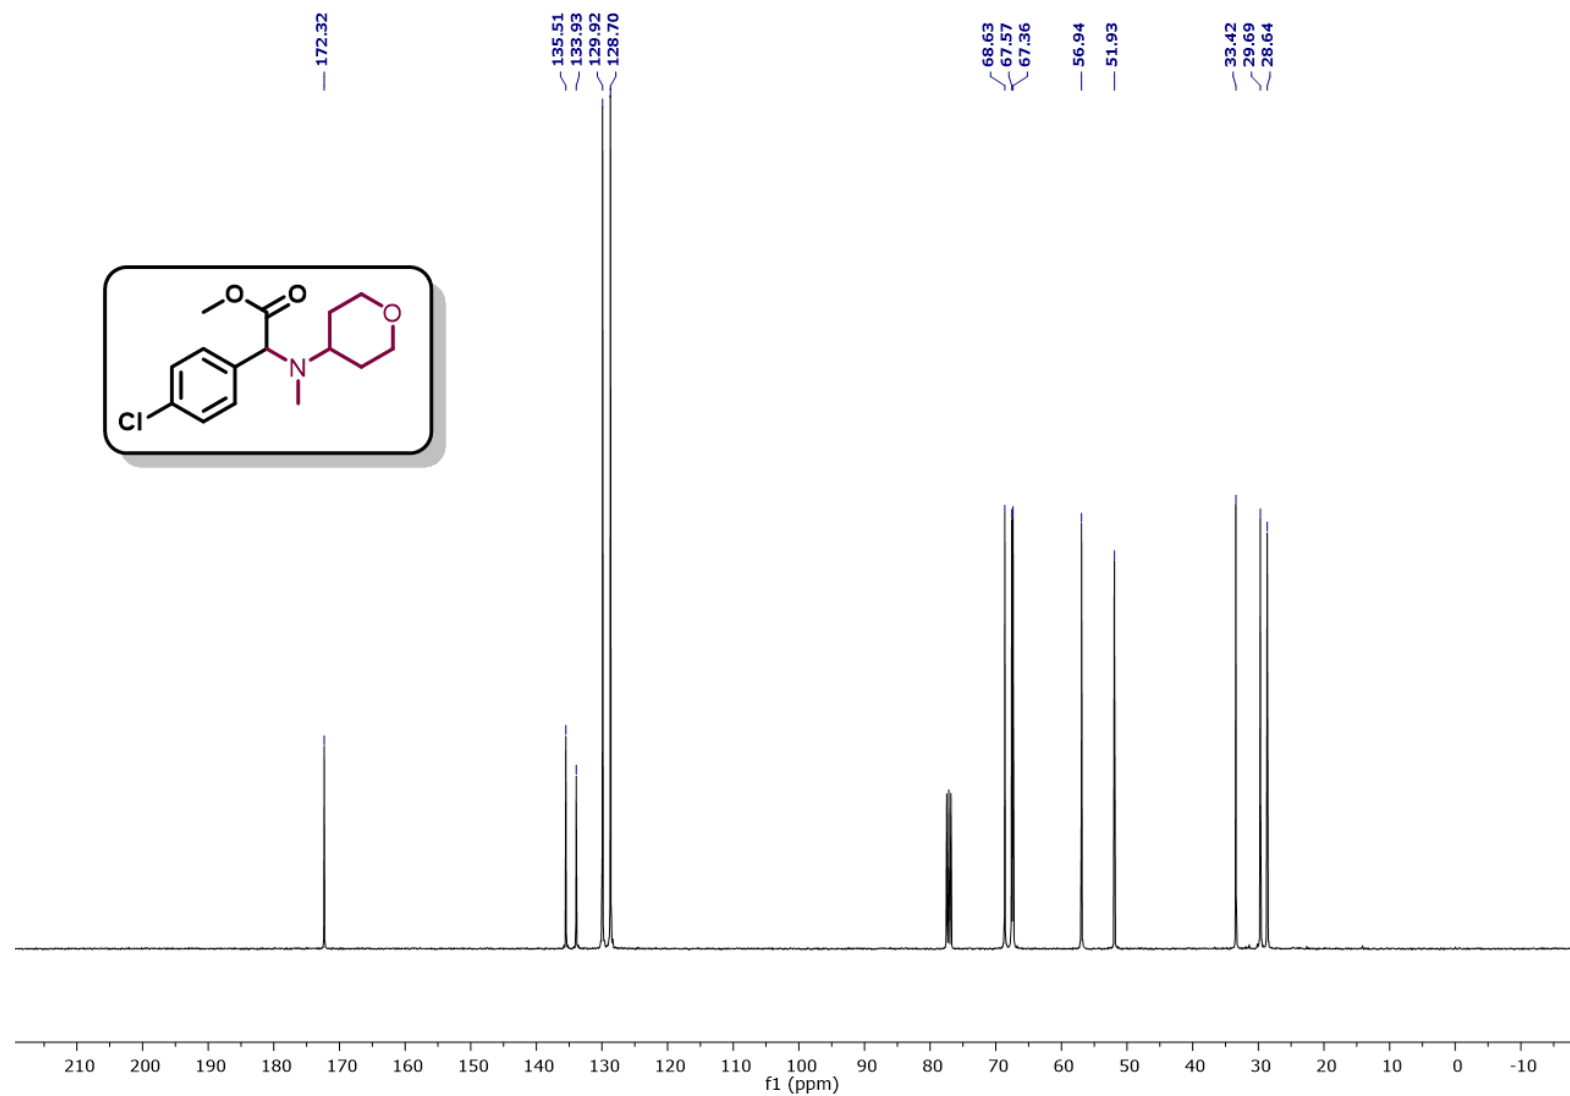

**Fig. S153.** <sup>13</sup>C NMR (101 MHz, CDCl<sub>3</sub>) spectra of Methyl 2-(4-chlorophenyl)-2-(methyl(tetrahydro-2H-pyran-4-yl)amino)acetate (**8h**).

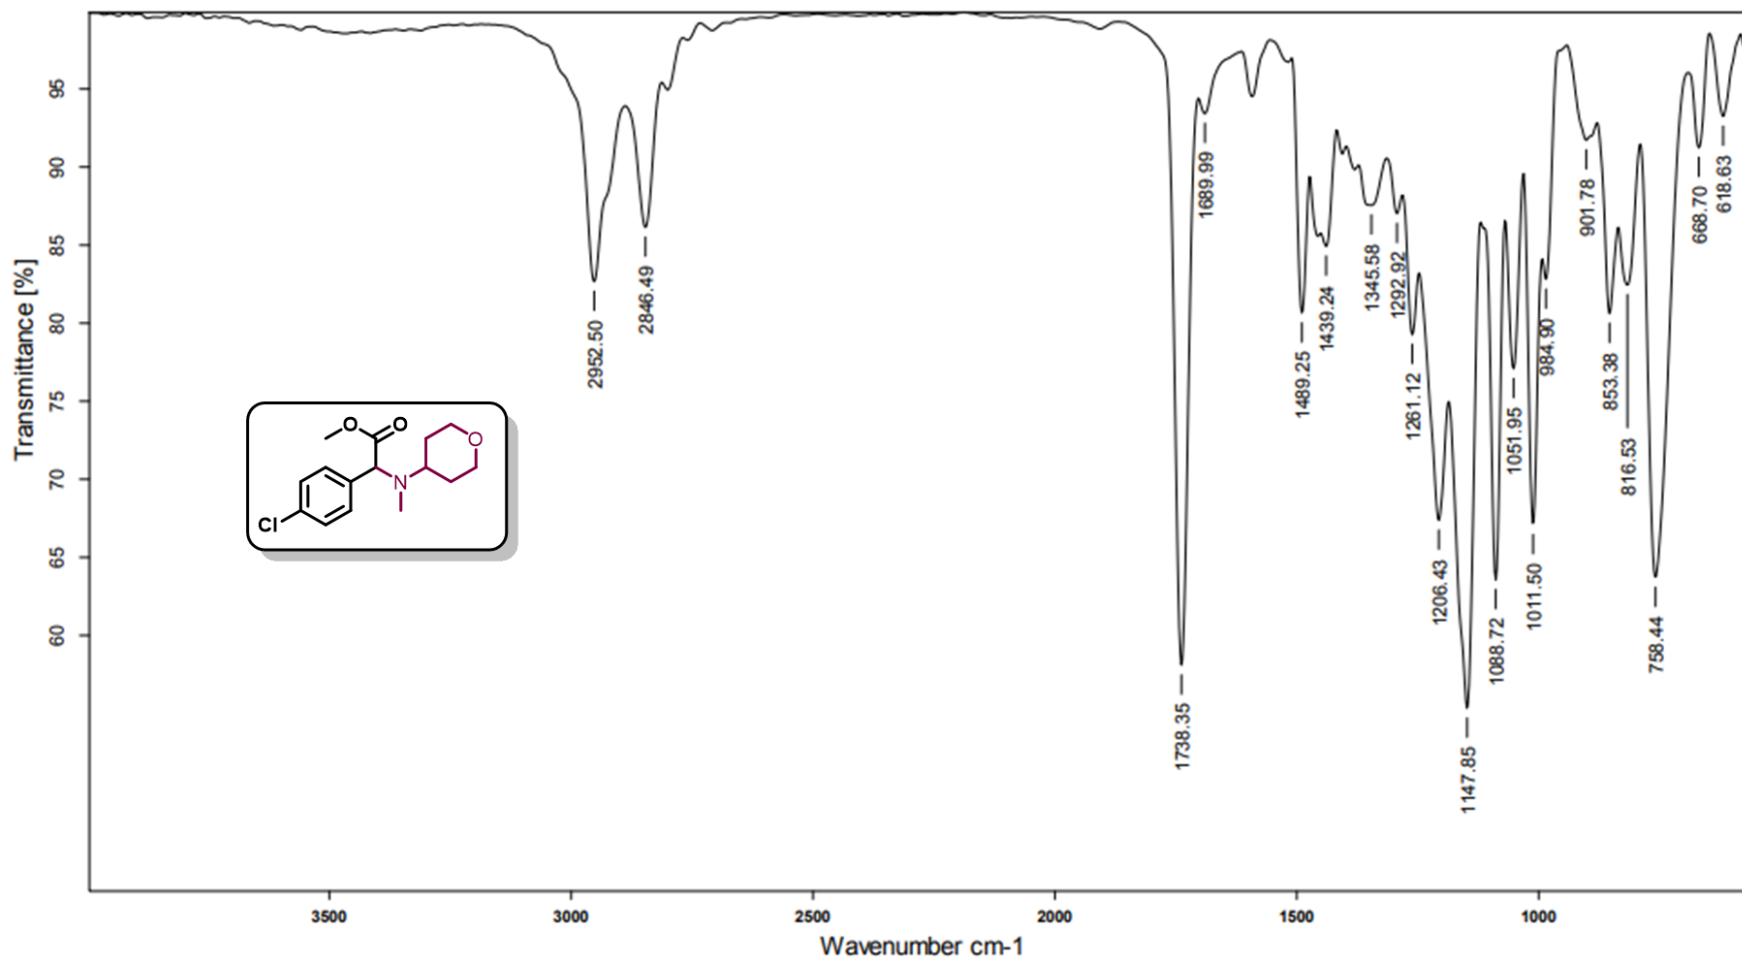

**Fig. S154.** IR spectra of Methyl 2-(4-chlorophenyl)-2-(methyl(tetrahydro-2H-pyran-4-yl)amino)acetate (**8h**).

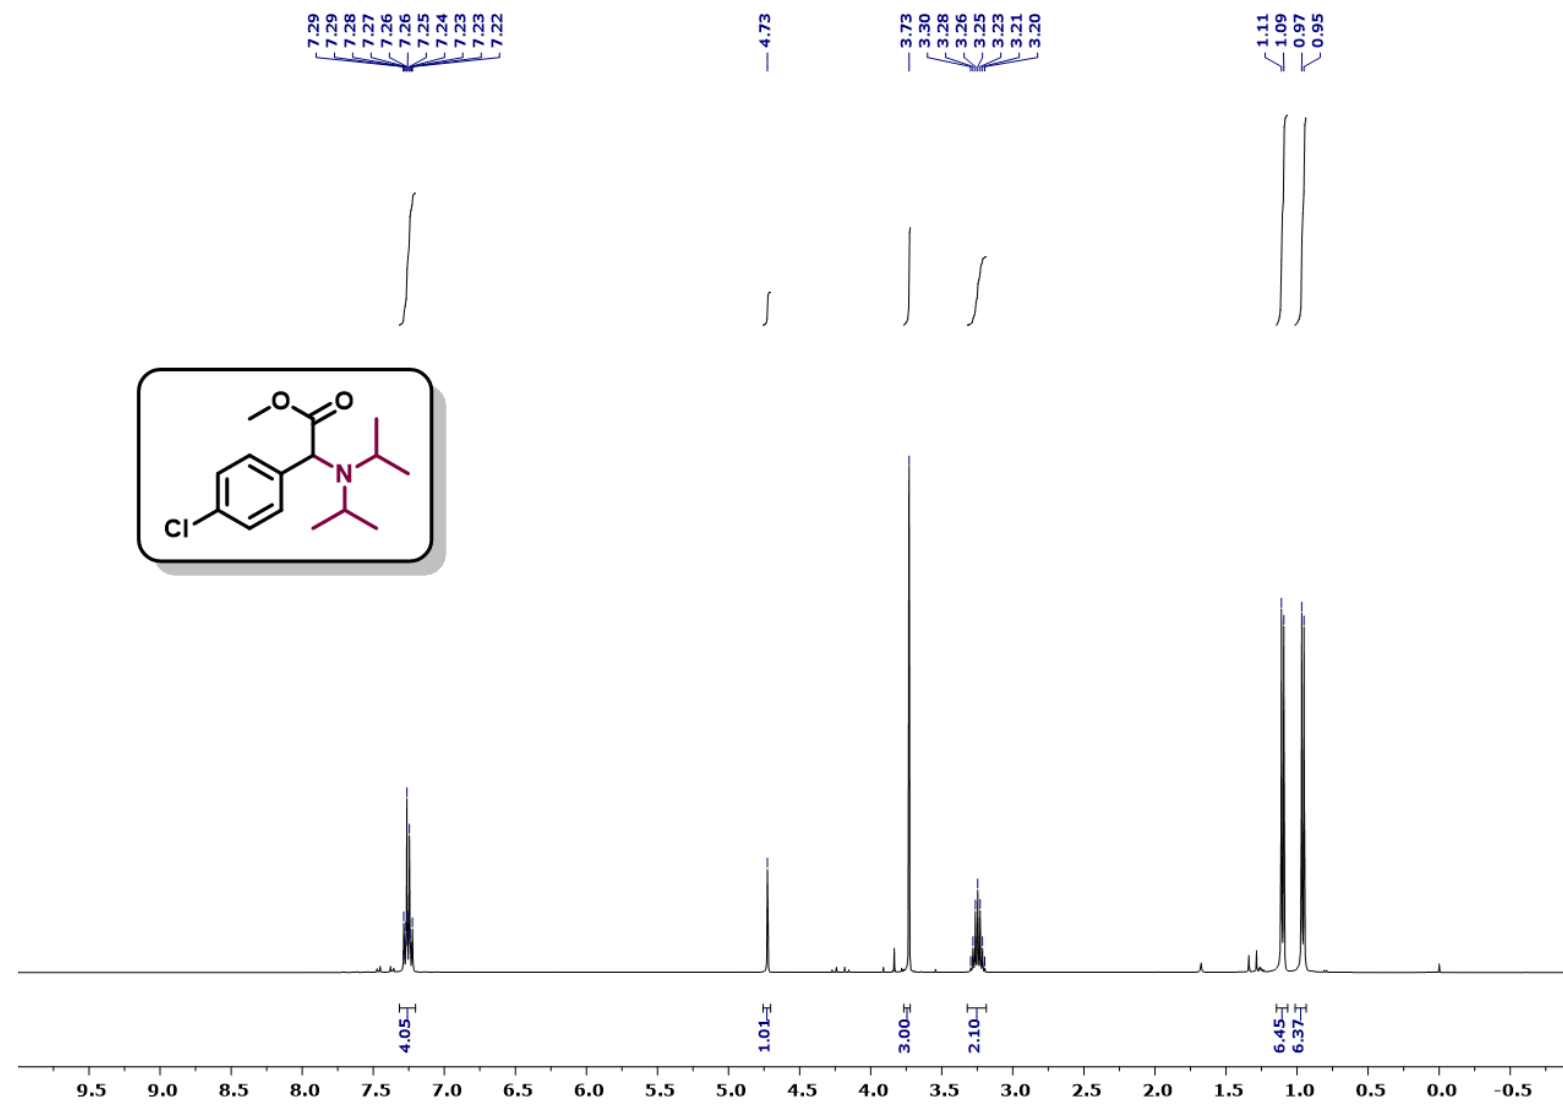

**Fig. S155.** <sup>1</sup>H NMR (400 MHz, CDCl<sub>3</sub>) spectra of methyl 2-(4-chlorophenyl)-2-(diisopropylamino)acetate (**8i**).

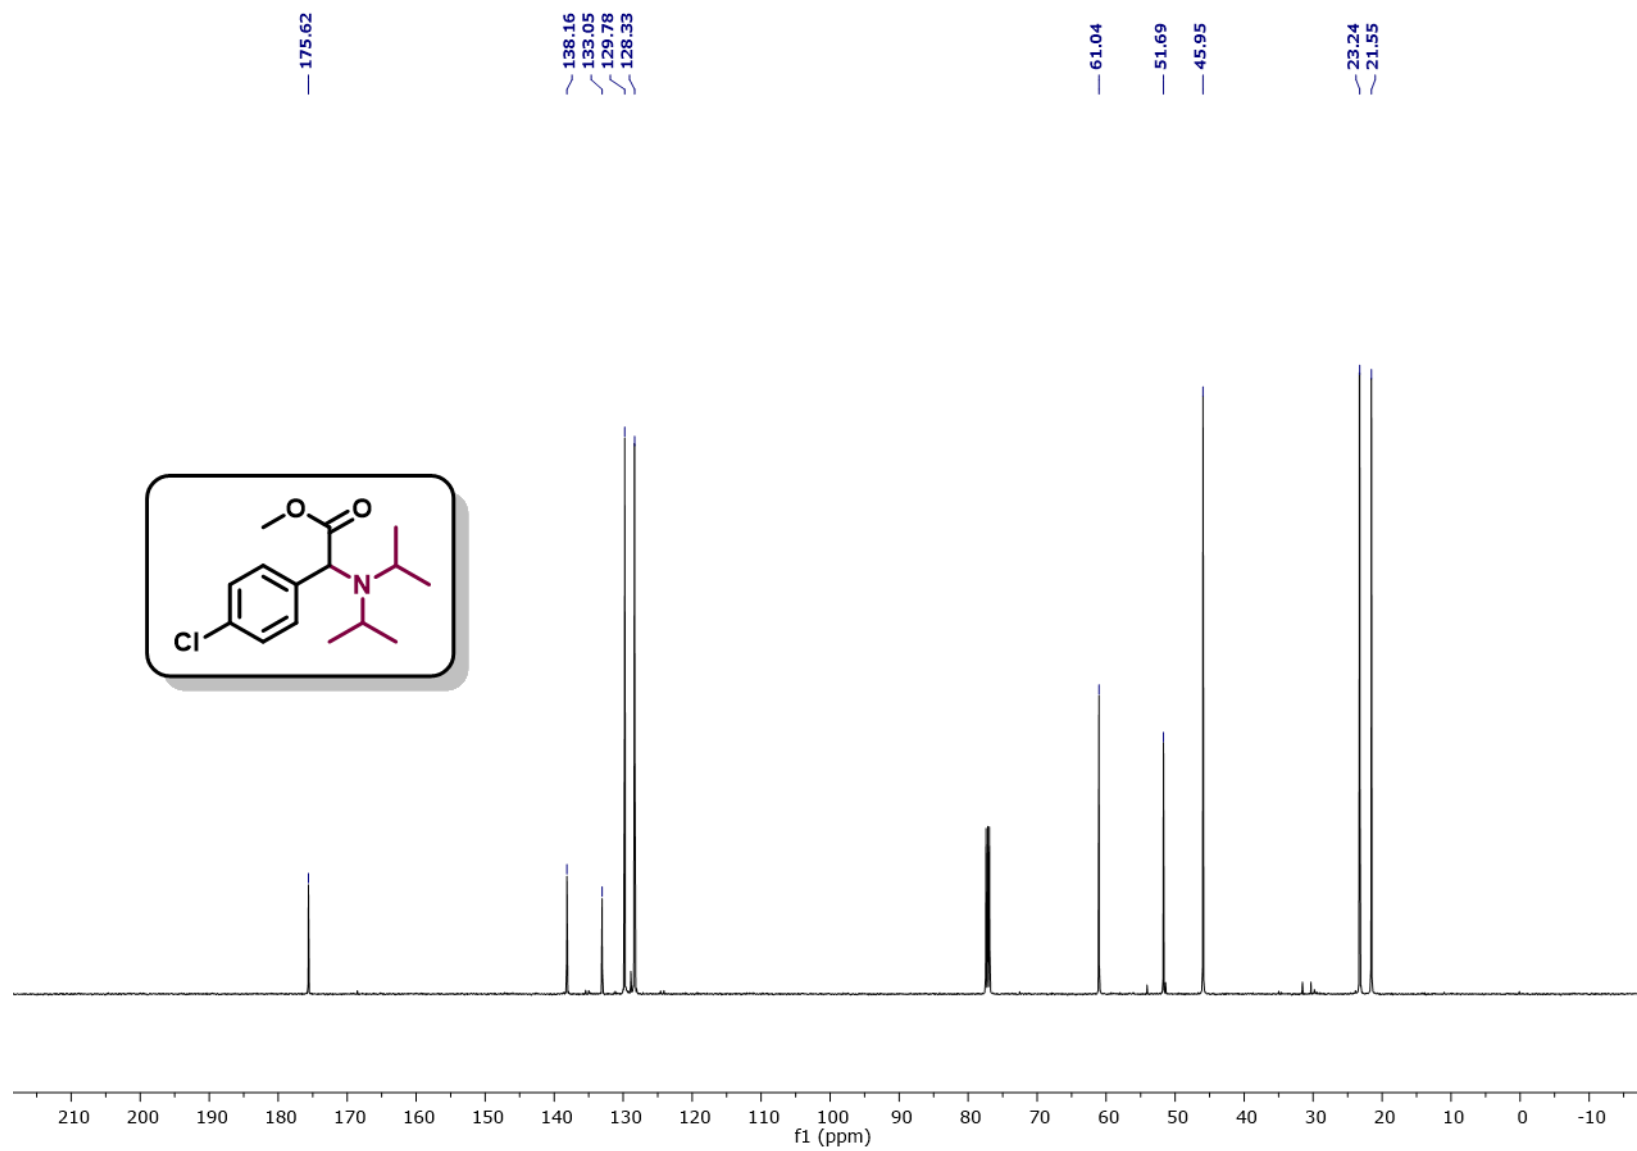

**Fig. S156.** <sup>13</sup>C NMR (126 MHz, CDCl<sub>3</sub>) spectra of methyl 2-(4-chlorophenyl)-2-(diisopropylamino)acetate (**8i**).

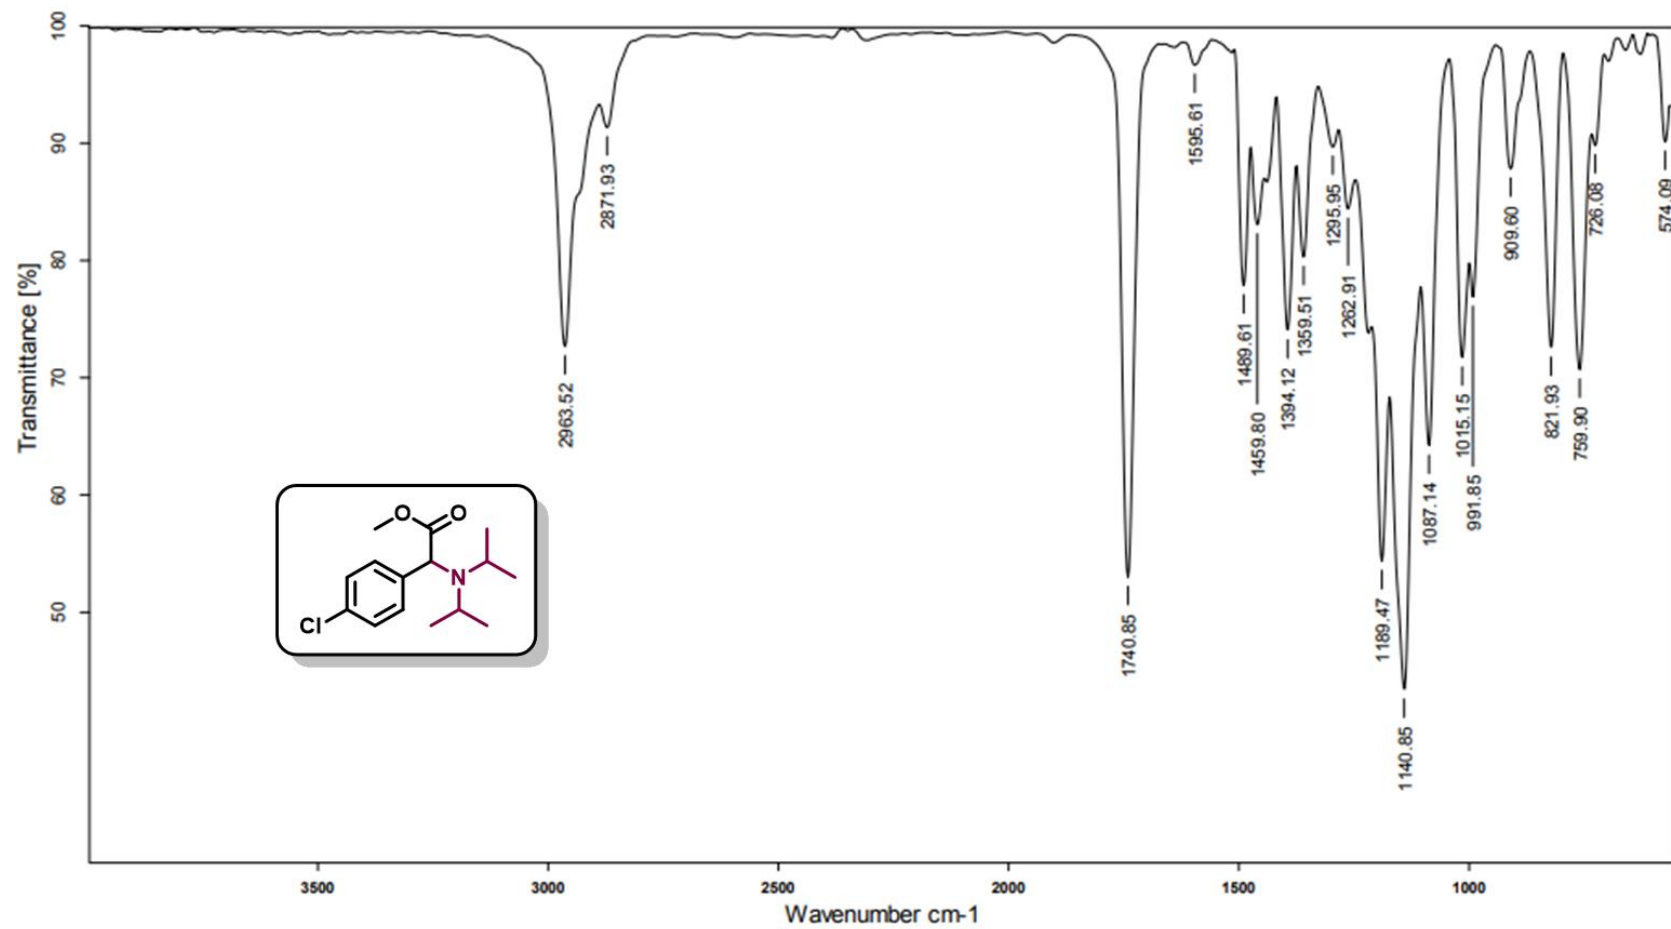

**Fig. S157.** IR spectra of methyl 2-(4-chlorophenyl)-2-(diisopropylamino)acetate (**8i**).

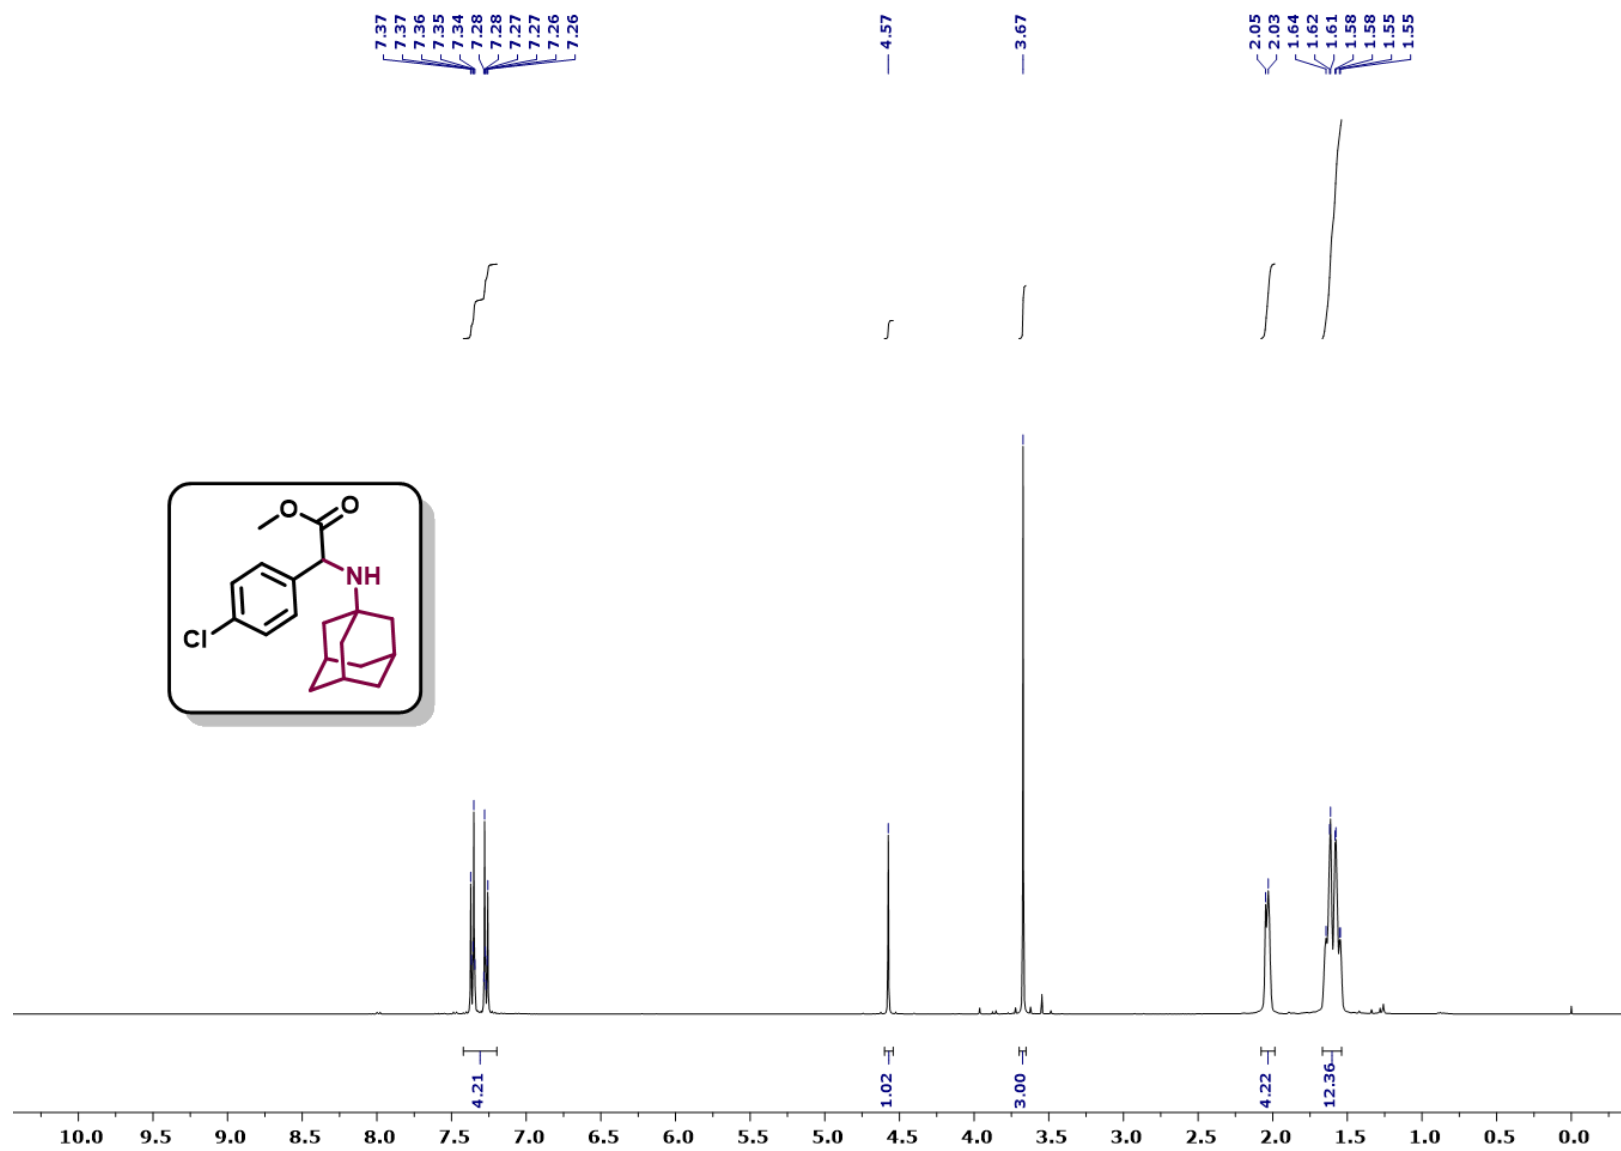

**Fig. S158.** <sup>1</sup>H NMR (400 MHz, CDCl<sub>3</sub>) spectra of methyl 2-(((3s,5s,7s)-adamantan-1-yl)amino)-2-(4-chlorophenyl)acetate (**8j**).

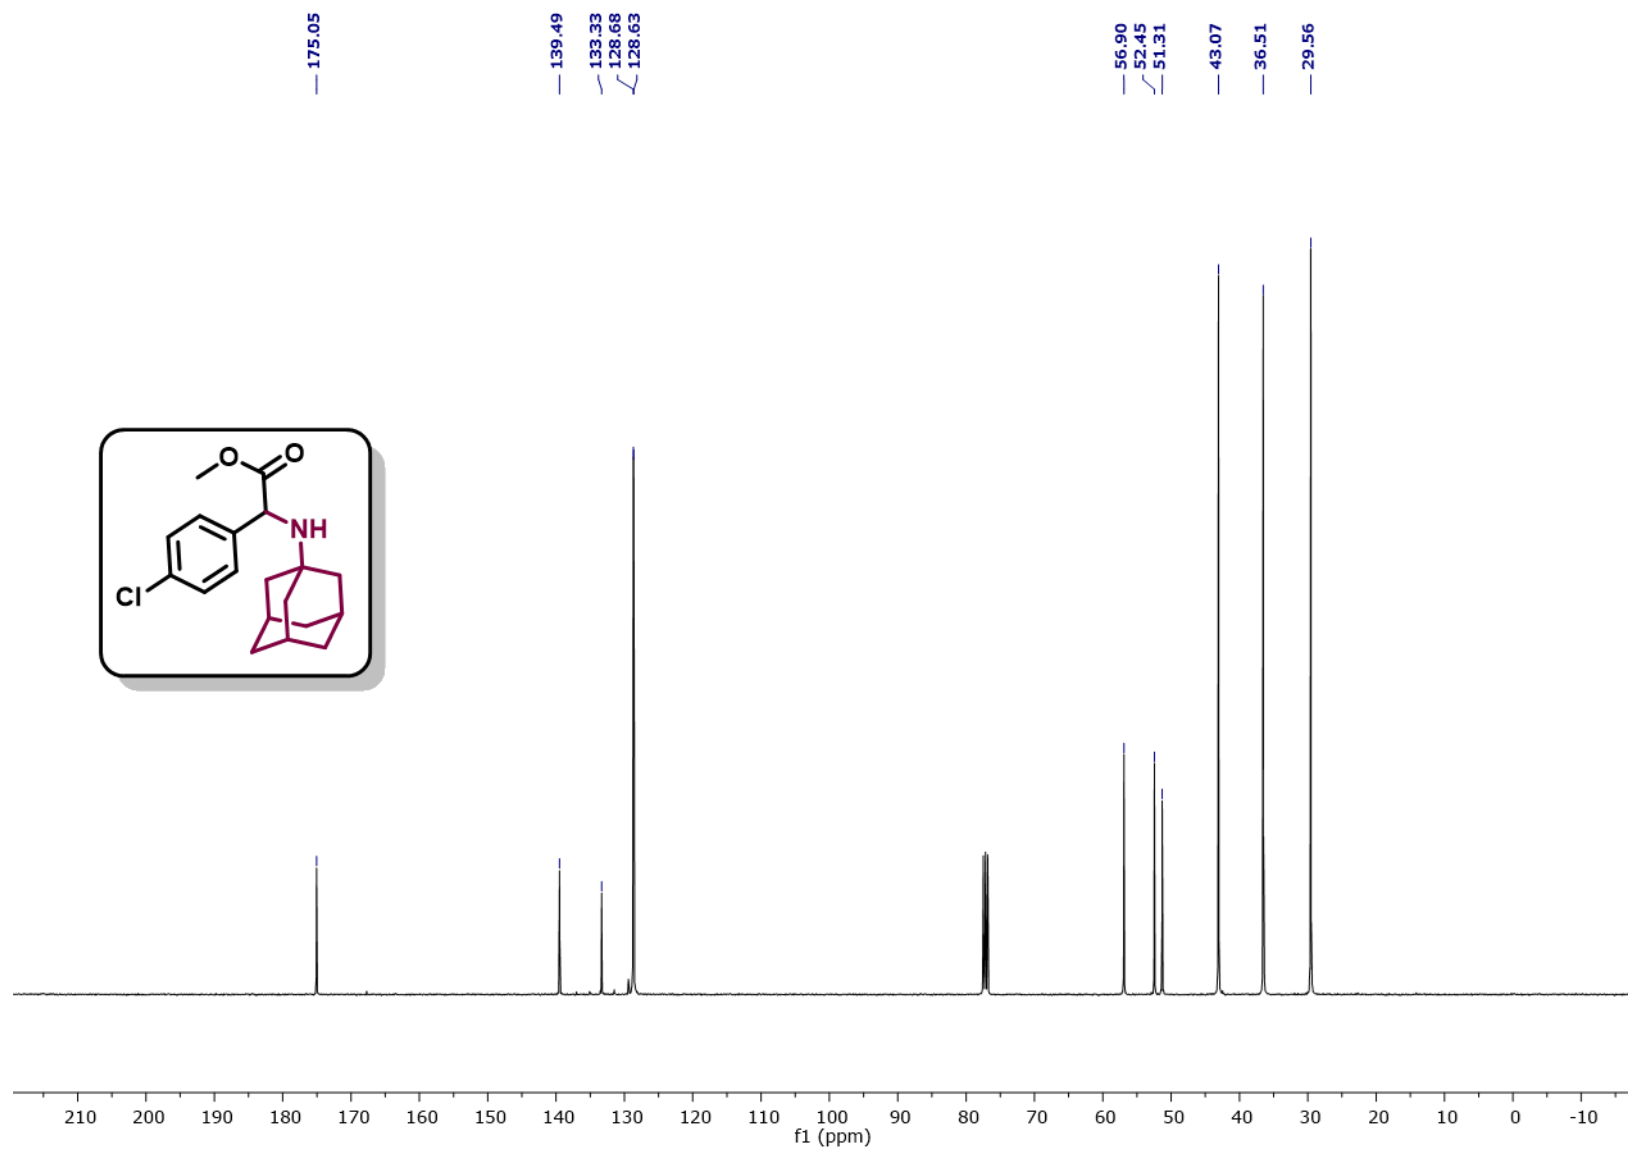

**Fig. S159.**  $^{13}\text{C}$  NMR (101 MHz,  $\text{CDCl}_3$ ) spectra of methyl 2-(((3s,5s,7s)-adamantan-1-yl)amino)-2-(4-chlorophenyl)acetate (**8j**).



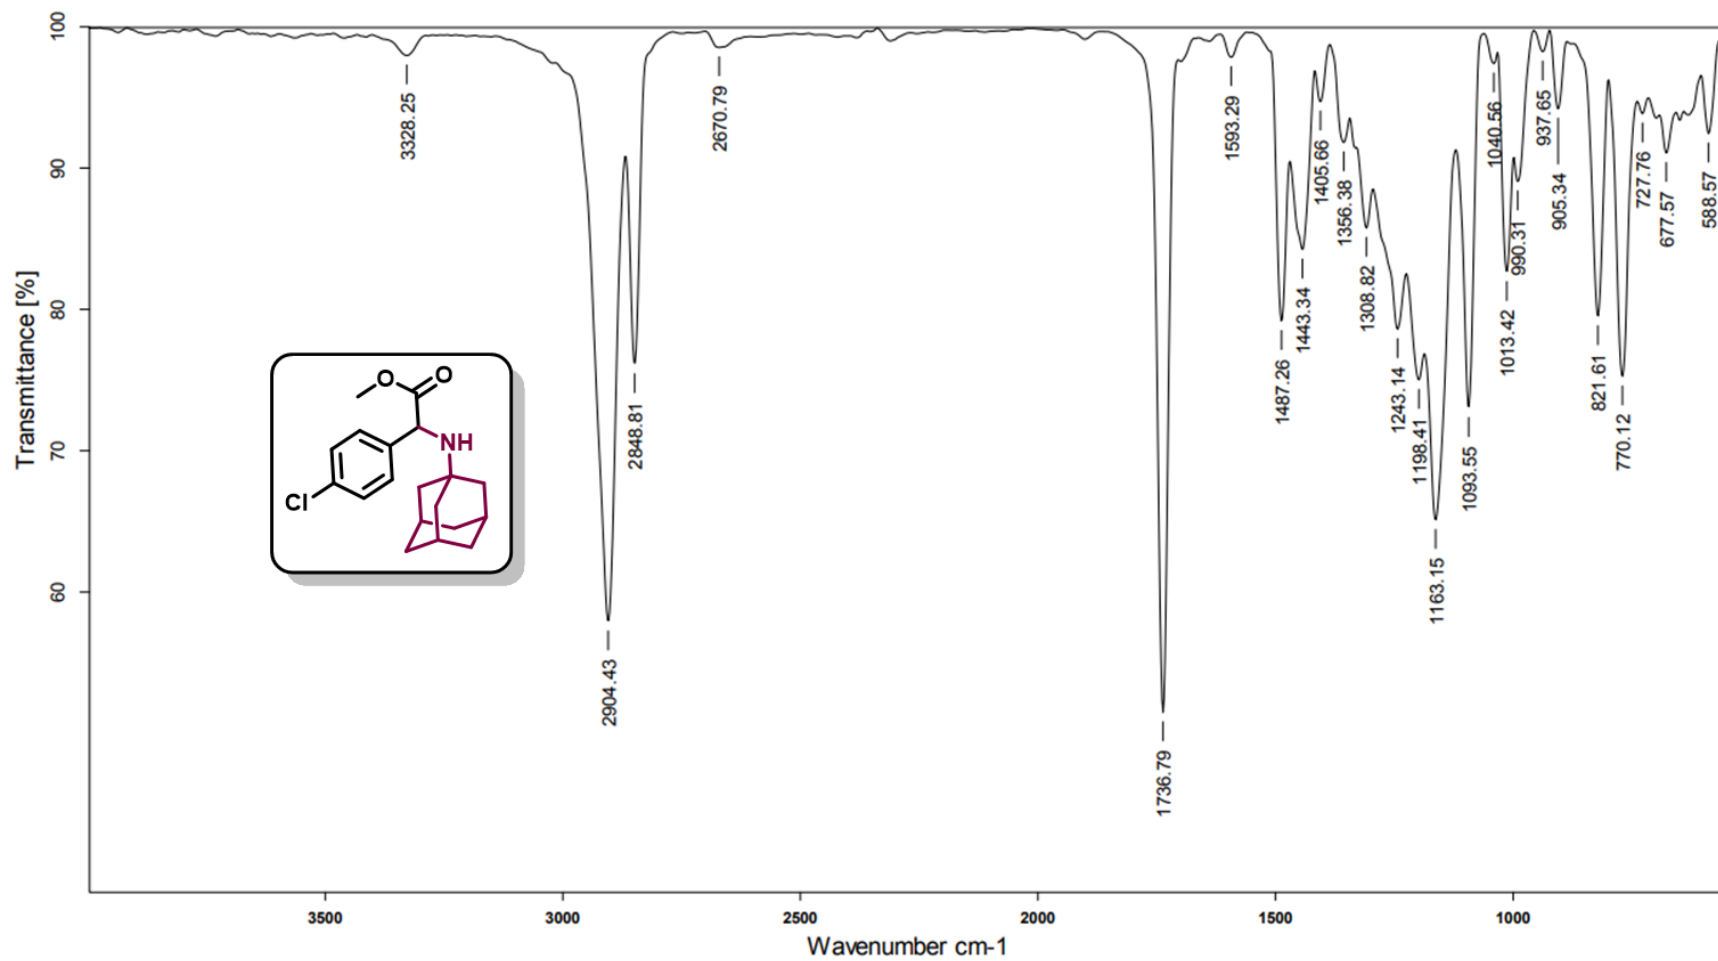

**Fig. S160.** IR spectra of methyl 2-(((3s,5s,7s)-adamantan-1-yl)amino)-2-(4-chlorophenyl)acetate (**8j**).

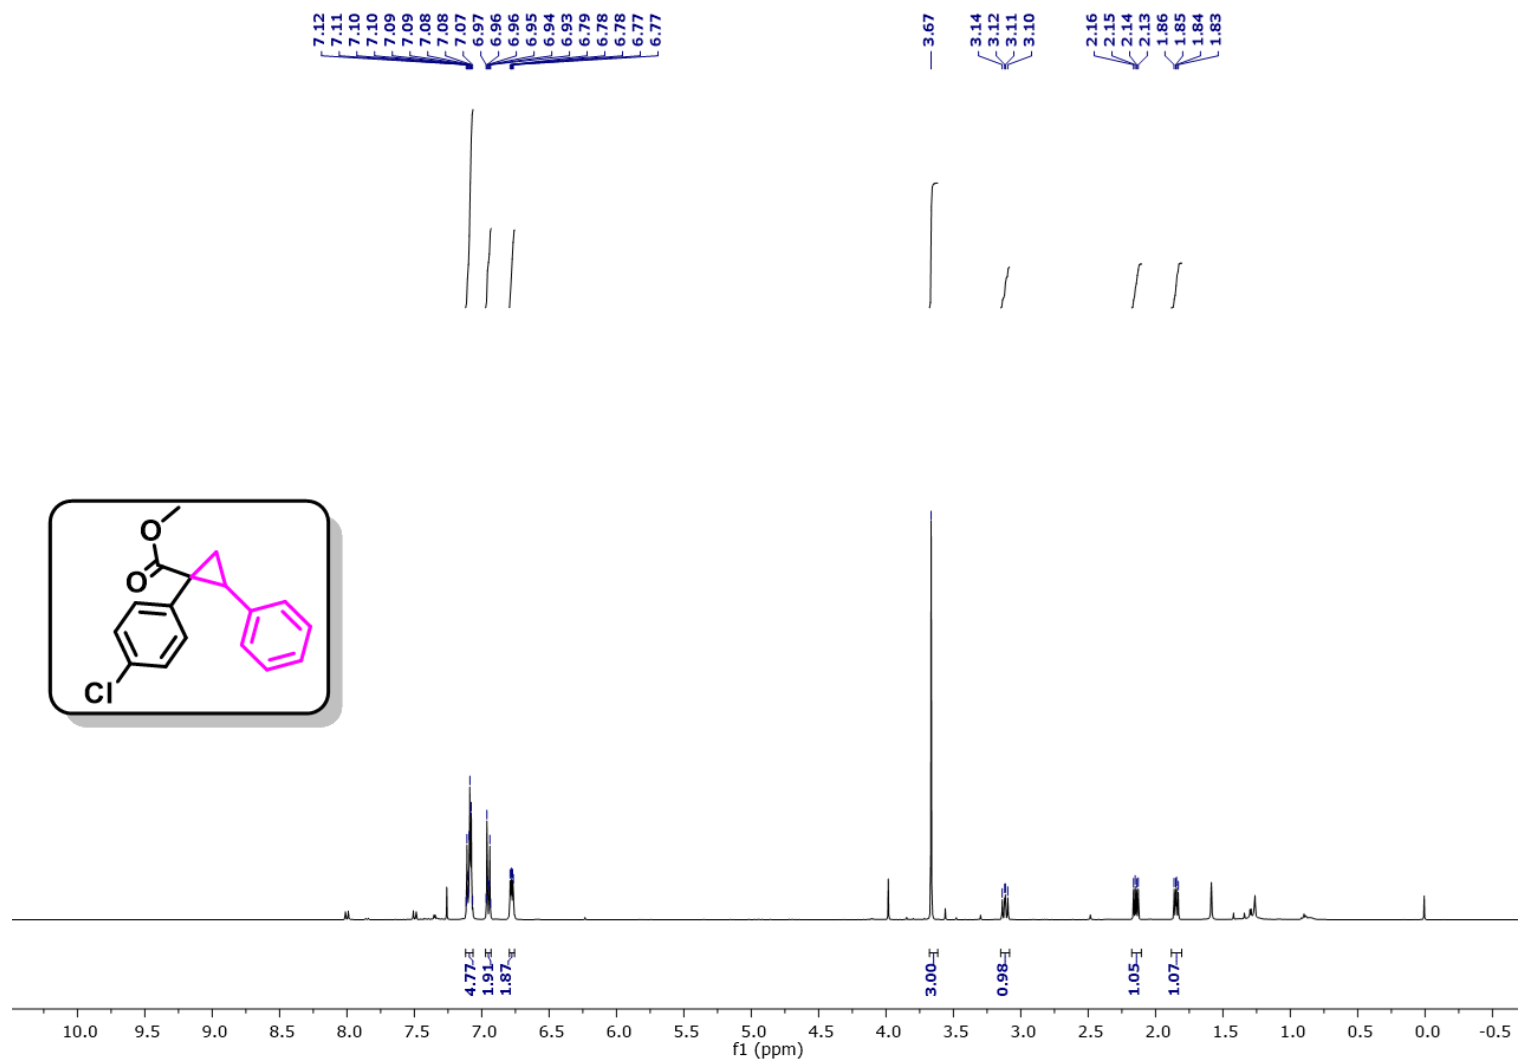

**Fig. S161.** <sup>1</sup>H NMR (400 MHz, CDCl<sub>3</sub>) spectra of methyl 1-(4-chlorophenyl)-2-phenylcyclopropane-1-carboxylate (**10a**).

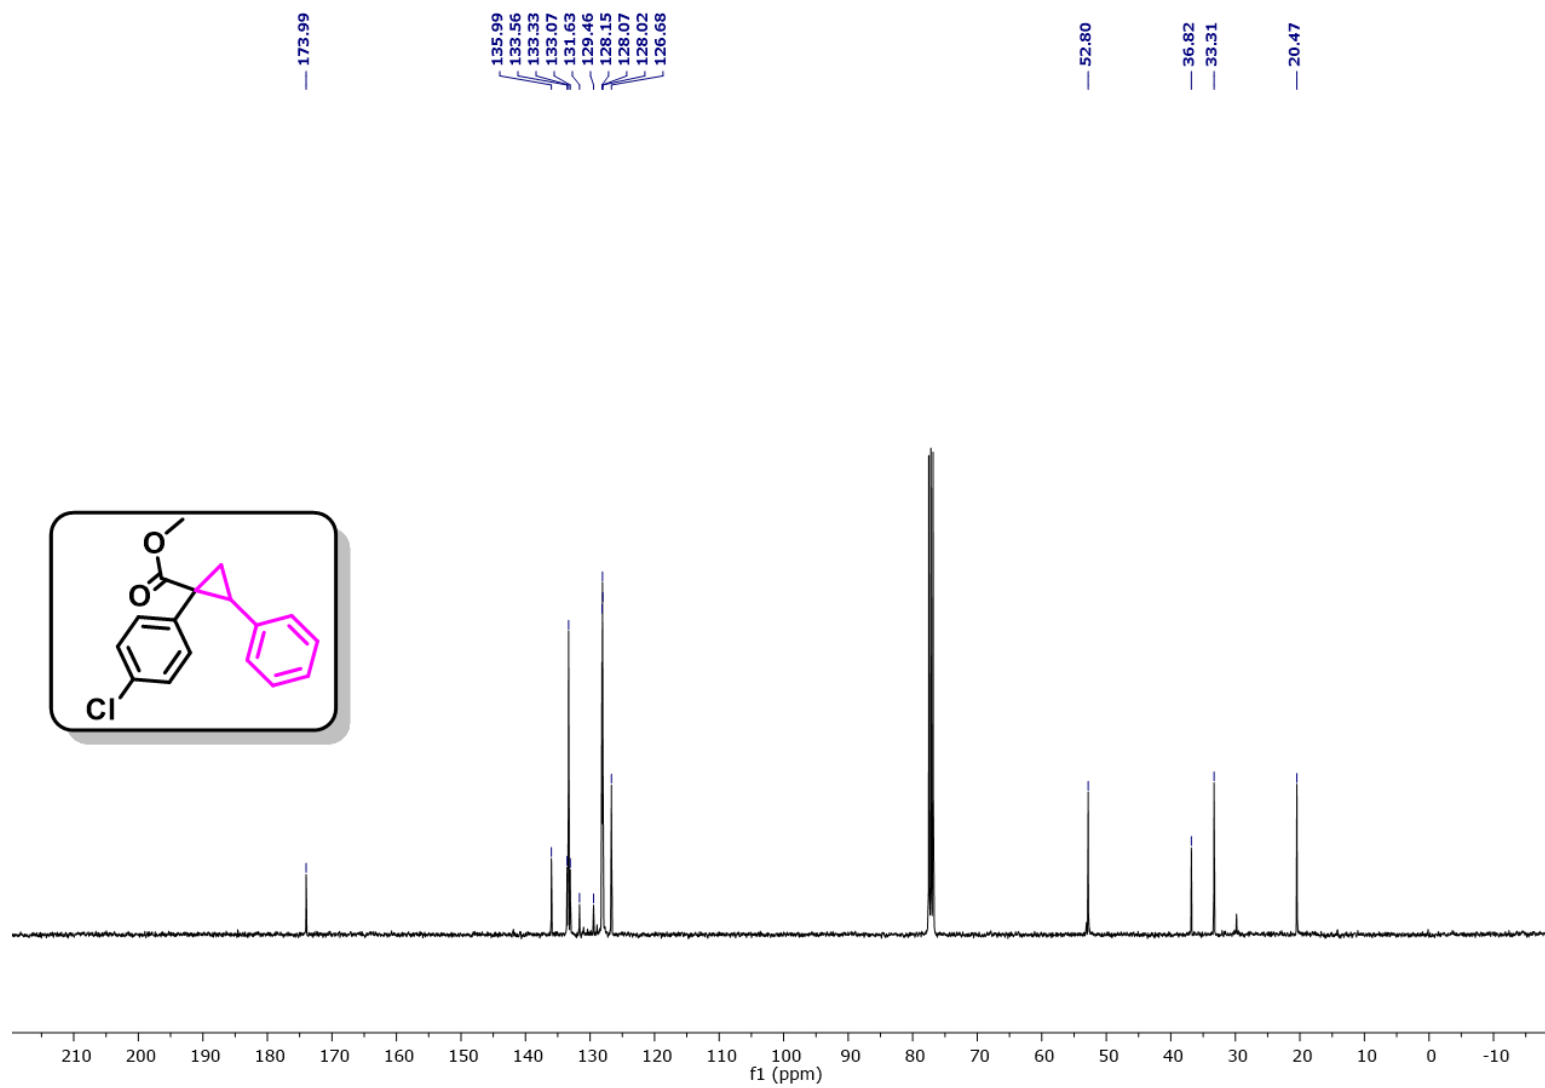

**Fig. S162.**  $^{13}\text{C}$  NMR (101 MHz,  $\text{CDCl}_3$ ) spectra of methyl 1-(4-chlorophenyl)-2-phenylcyclopropane-1-carboxylate (**10a**).

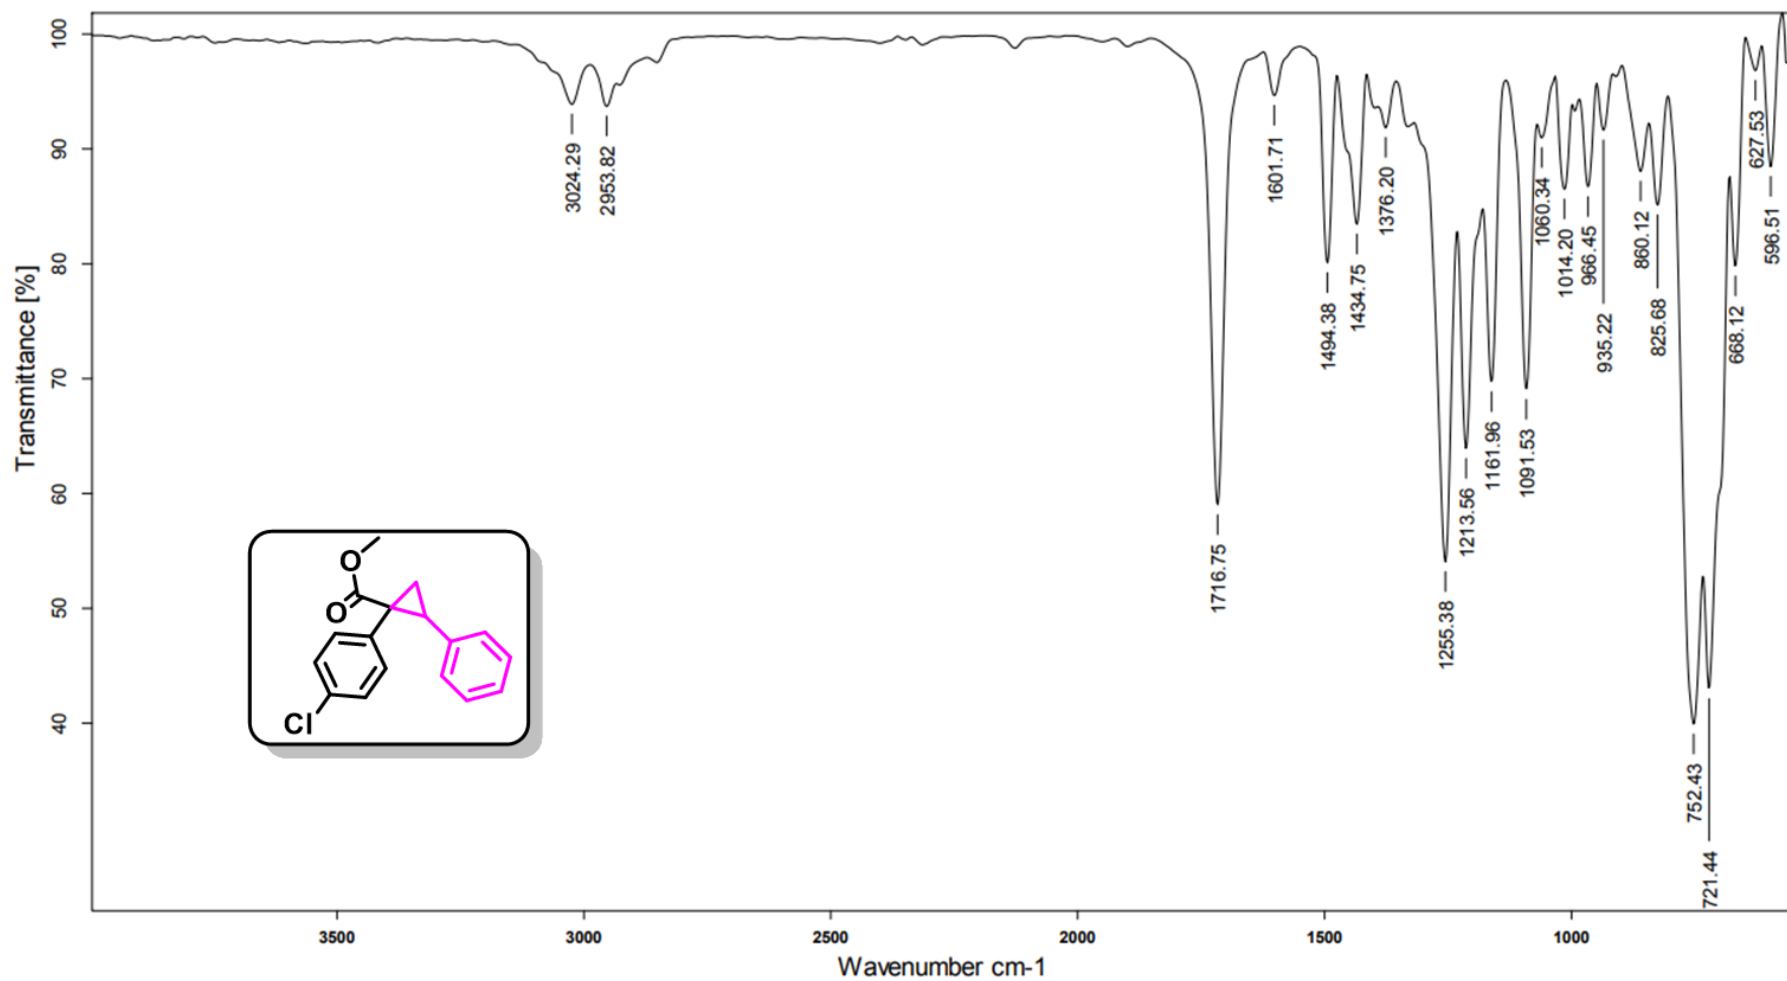

**Fig. S163.** IR spectra of spectra of methyl 1-(4-chlorophenyl)-2-phenylcyclopropane-1-carboxylate (**10a**).

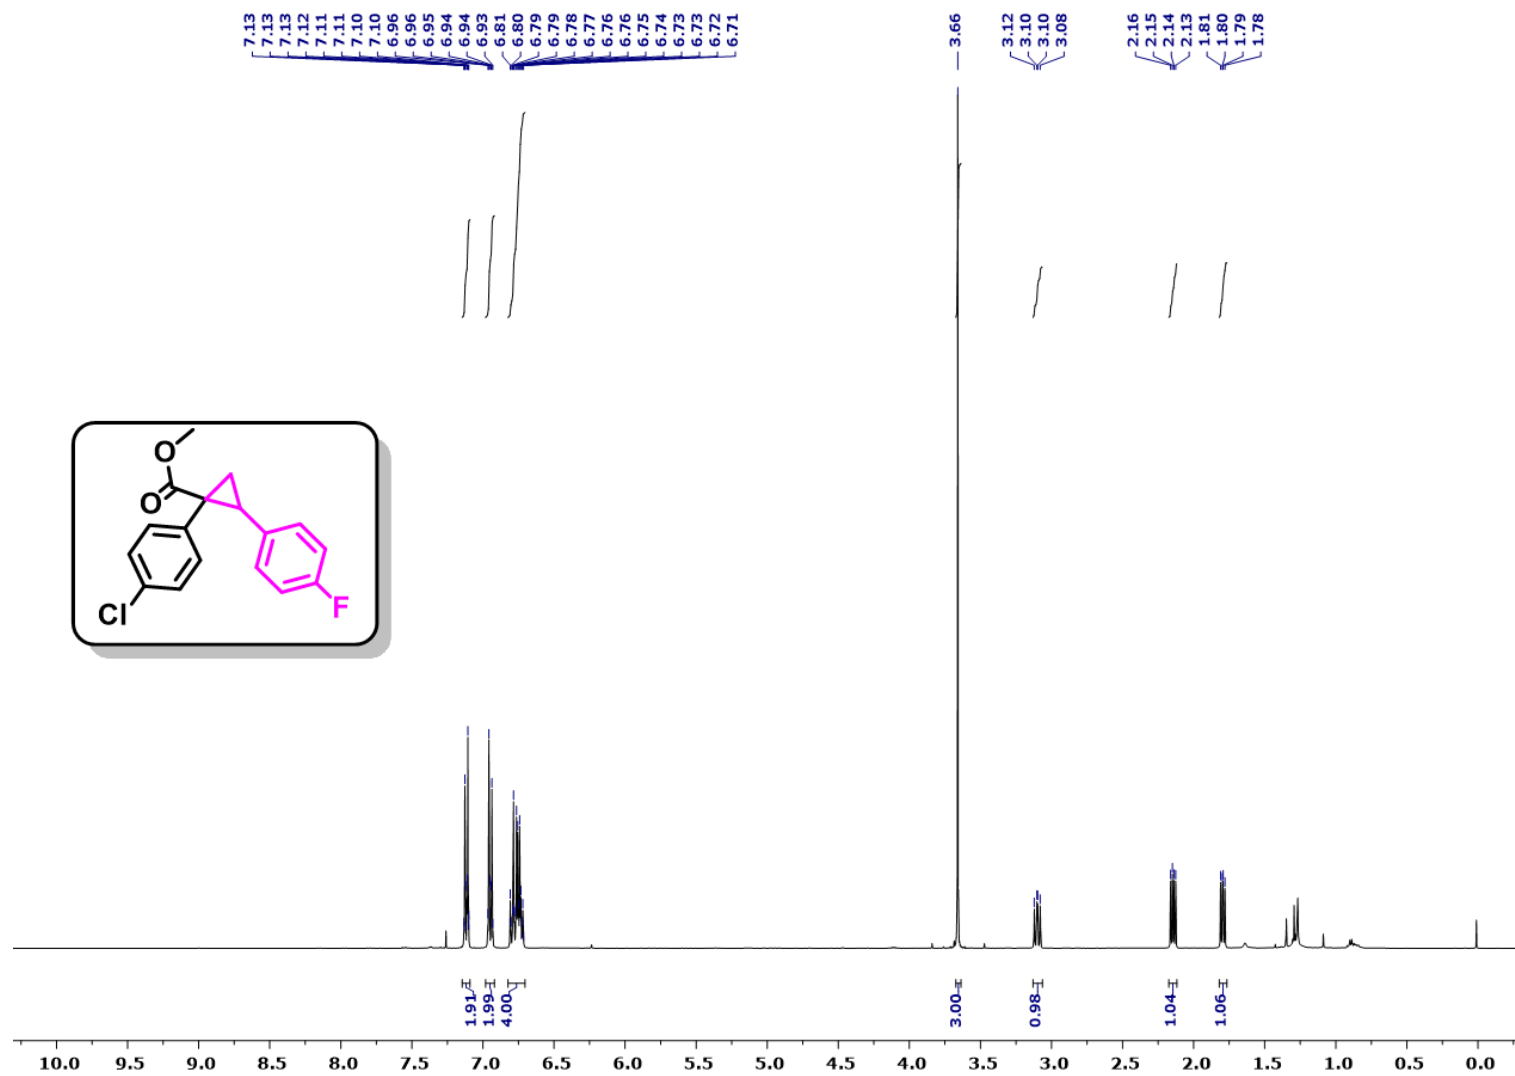

**Fig. S164.** <sup>1</sup>H NMR (400 MHz, CDCl<sub>3</sub>) spectra of methyl 1-(4-chlorophenyl)-2-(4-fluorophenyl)cyclopropane-1-carboxylate (**10b**).

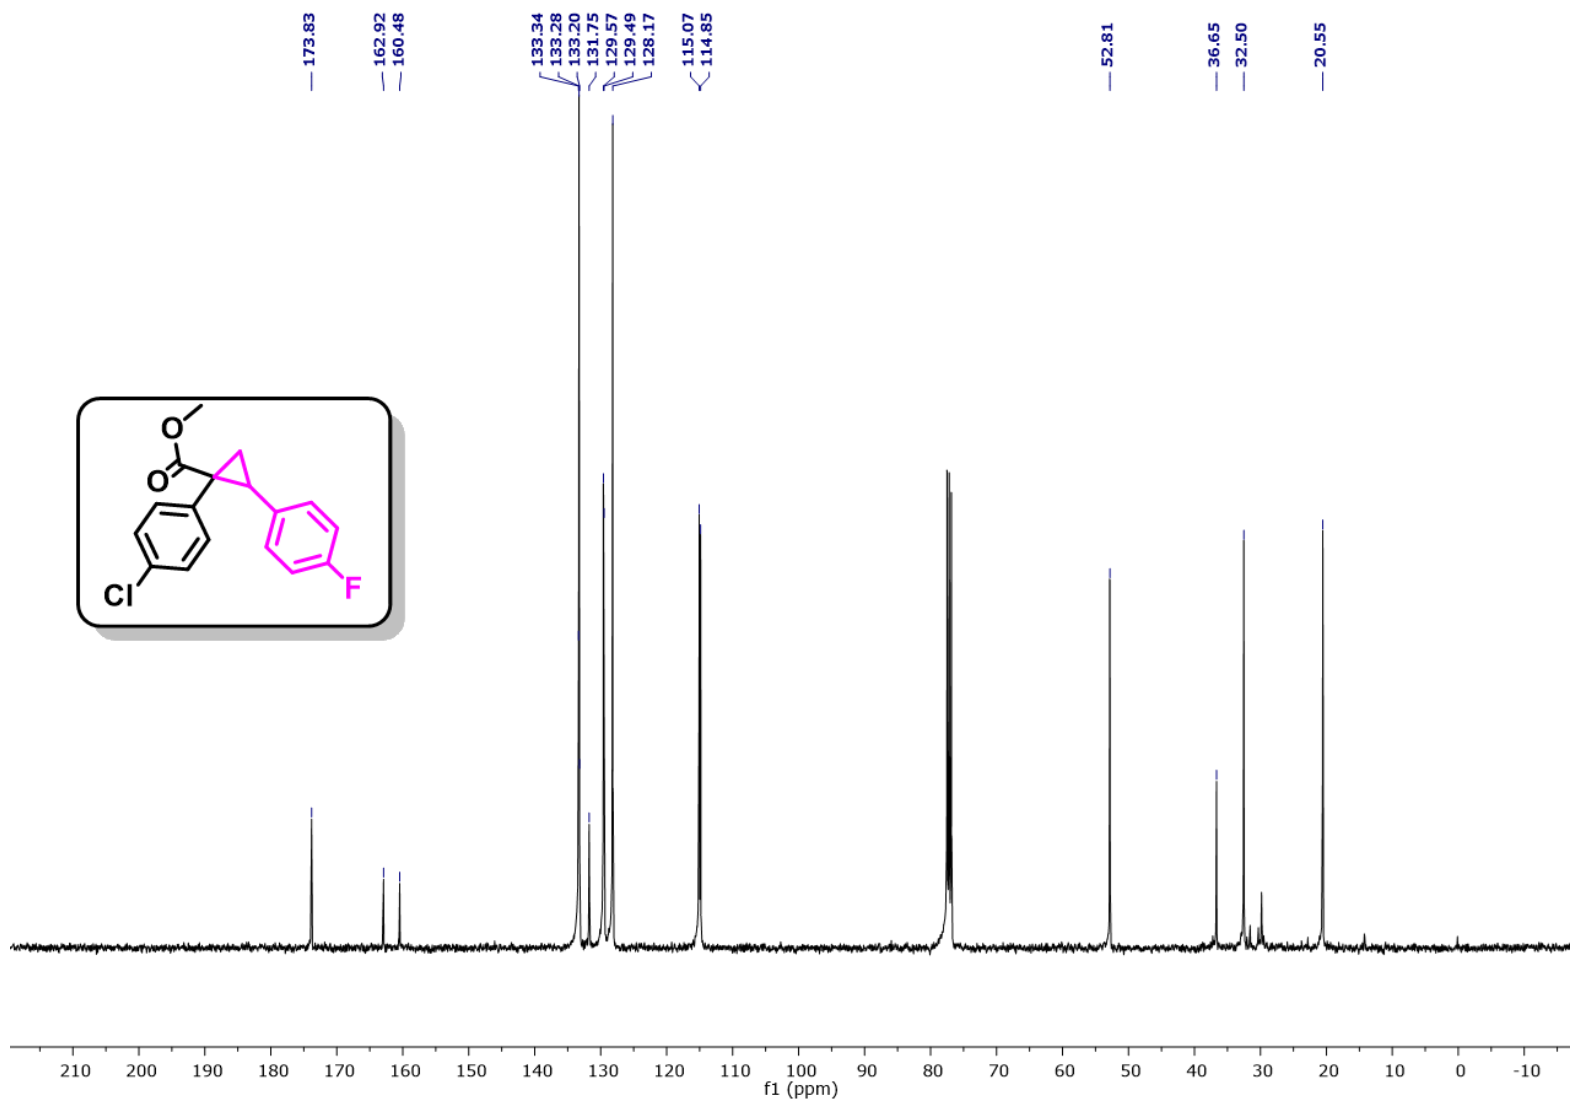

**Fig. S165.** <sup>13</sup>C NMR (101 MHz, CDCl<sub>3</sub>) spectra of methyl 1-(4-chlorophenyl)-2-(4-fluorophenyl)cyclopropane-1-carboxylate (**10b**).

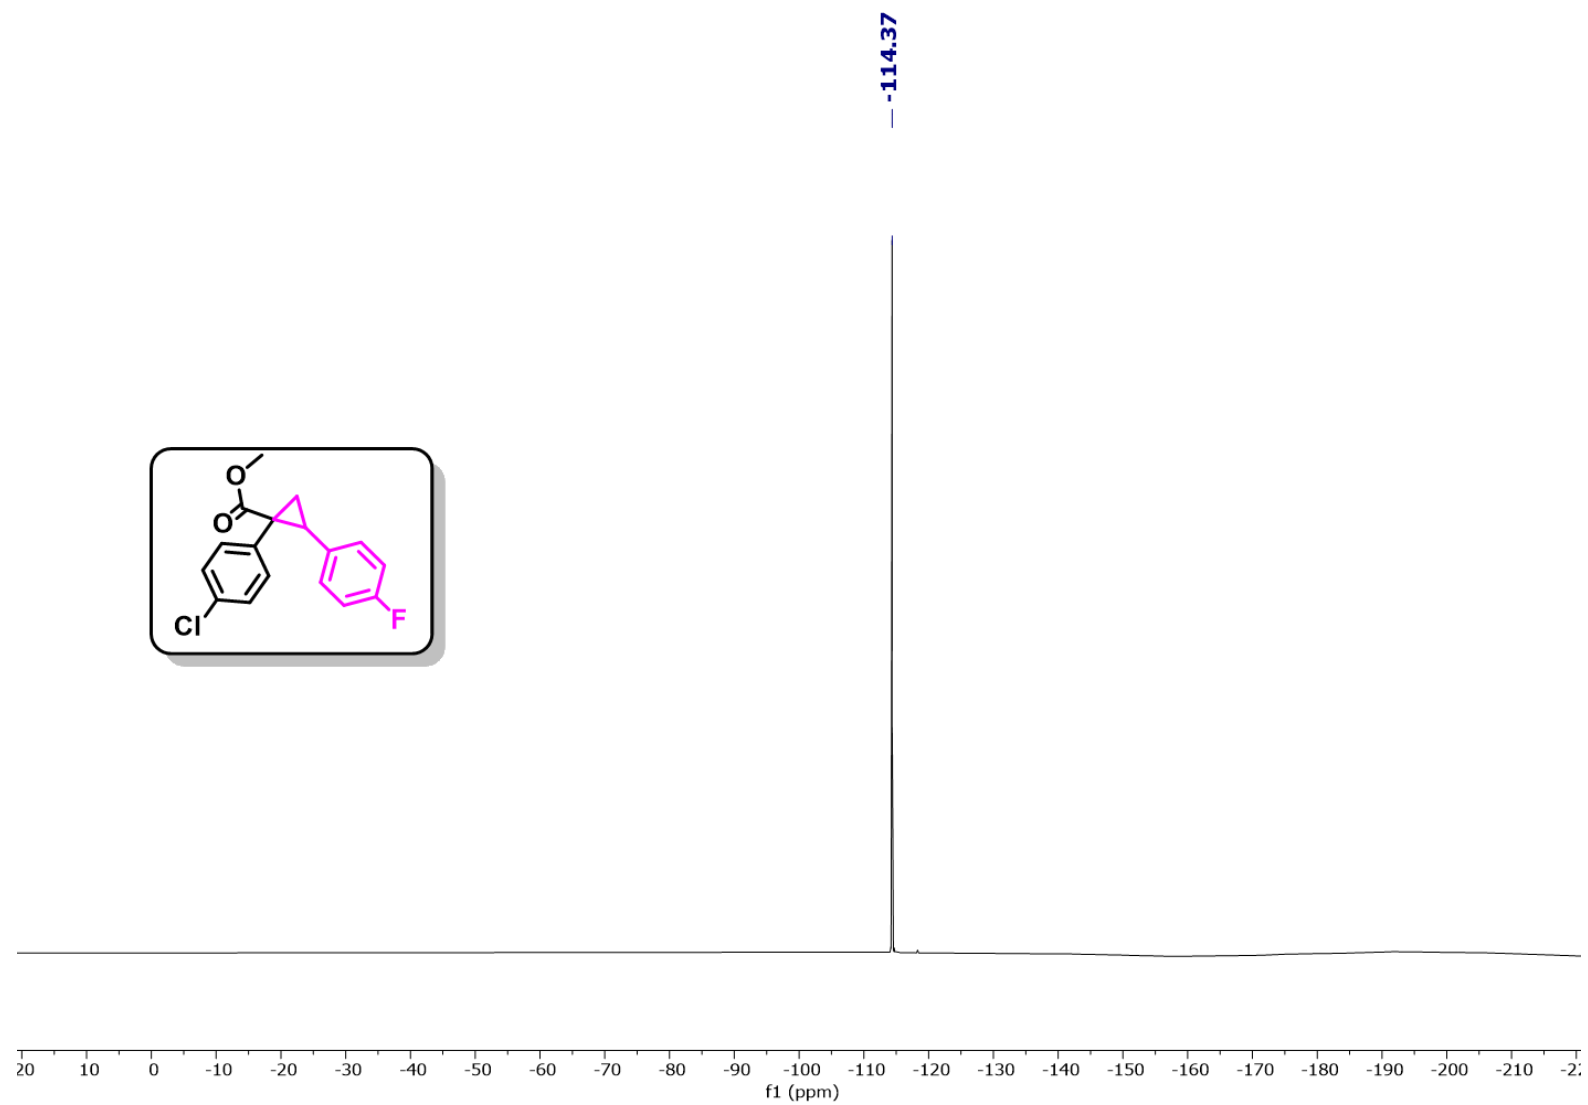

**Fig. S166.**  $^{19}\text{F}$  NMR (471 MHz,  $\text{CDCl}_3$ ) spectra of methyl 1-(4-chlorophenyl)-2-(4-fluorophenyl)cyclopropane-1-carboxylate (**10b**).

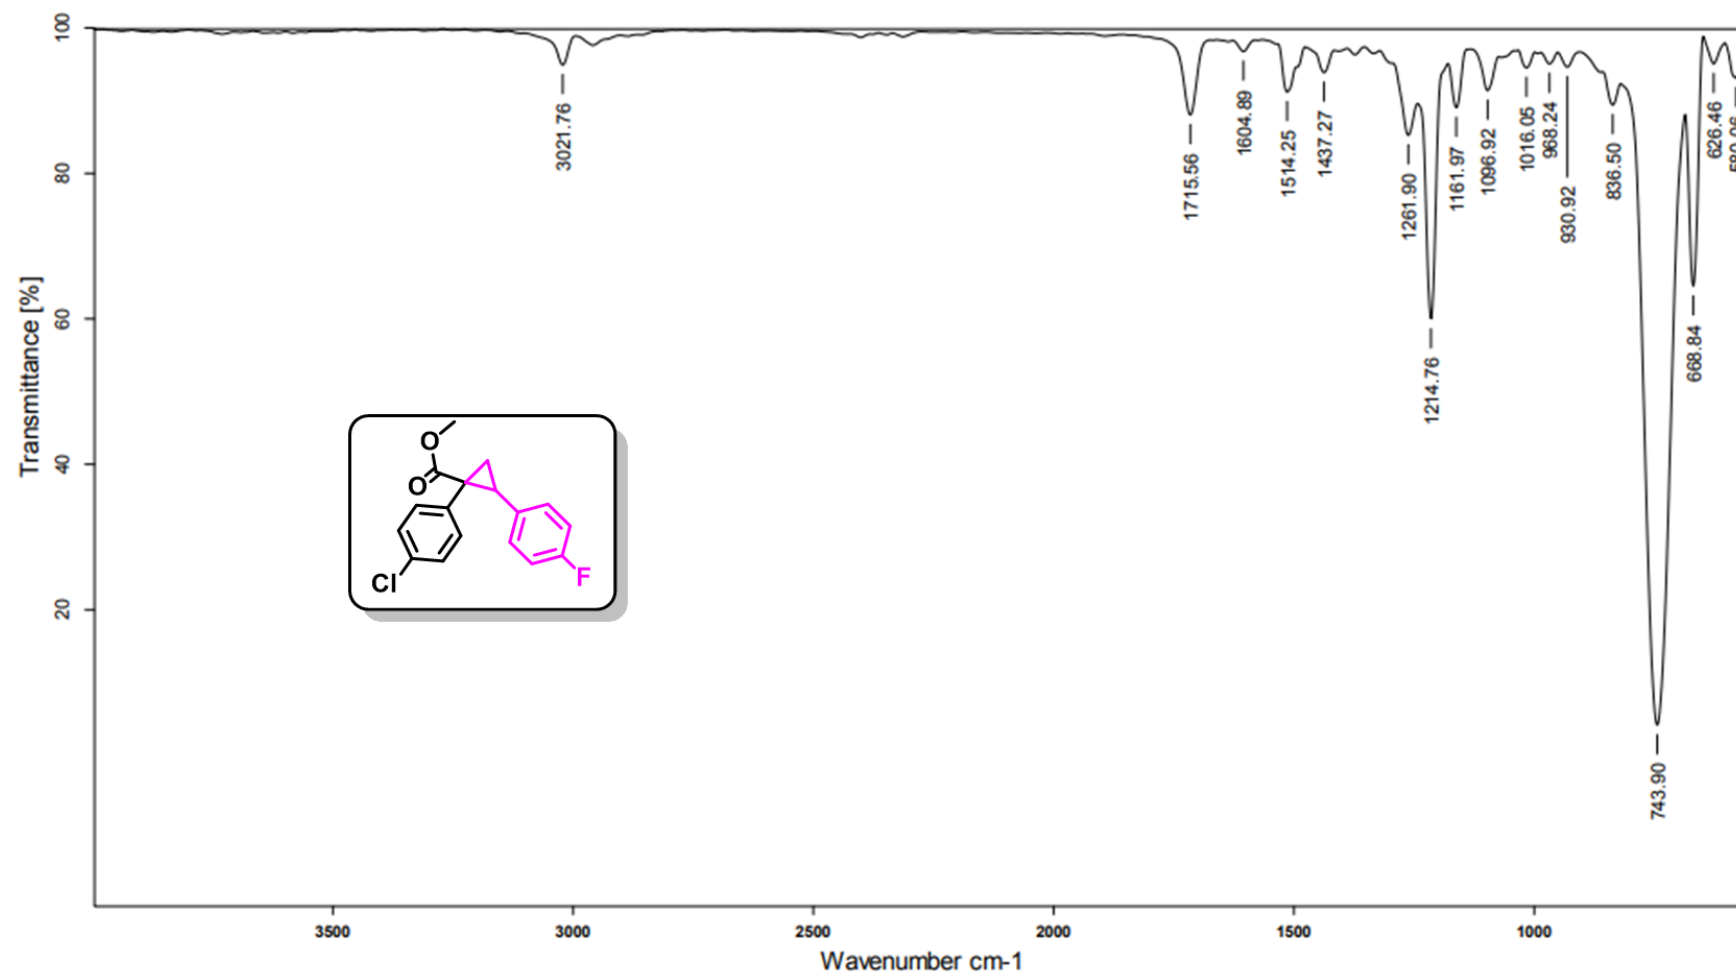

**Fig. S167.** IR spectra of spectra of methyl 1-(4-chlorophenyl)-2-(4-fluorophenyl)cyclopropane-1-carboxylate (**10b**).



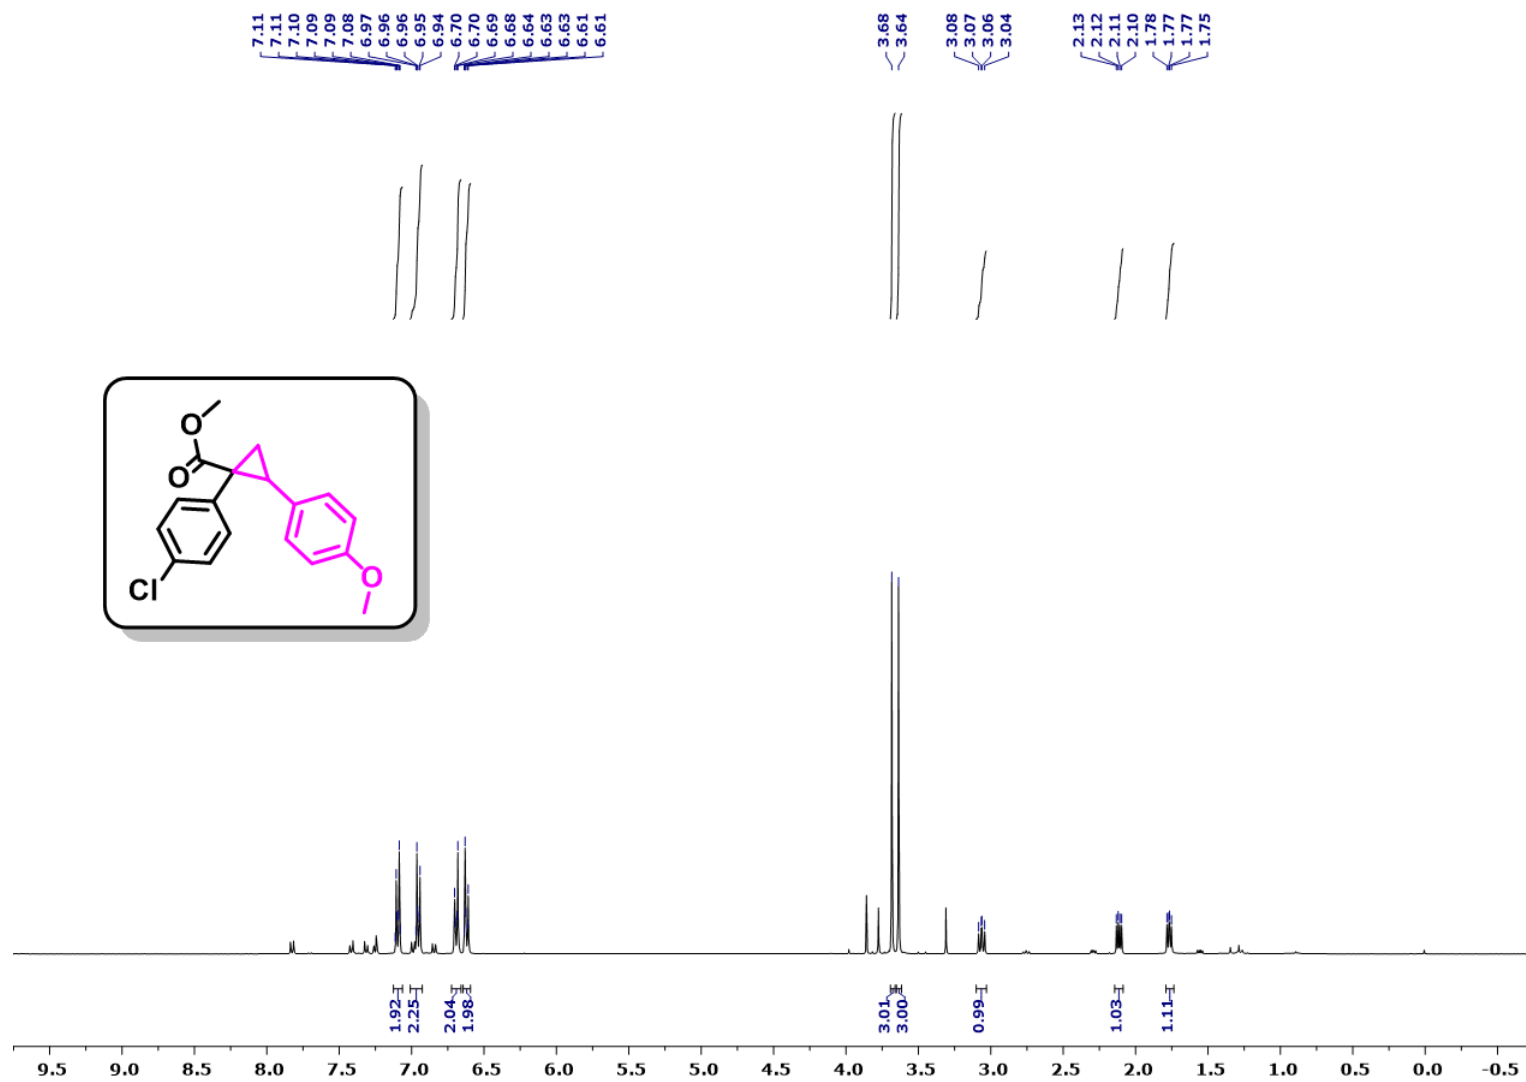

**Fig. S168.** <sup>1</sup>H NMR (400 MHz, CDCl<sub>3</sub>) spectra of methyl 1-(4-chlorophenyl)-2-(4-methoxyphenyl)cyclopropane-1-carboxylate (**10c**).

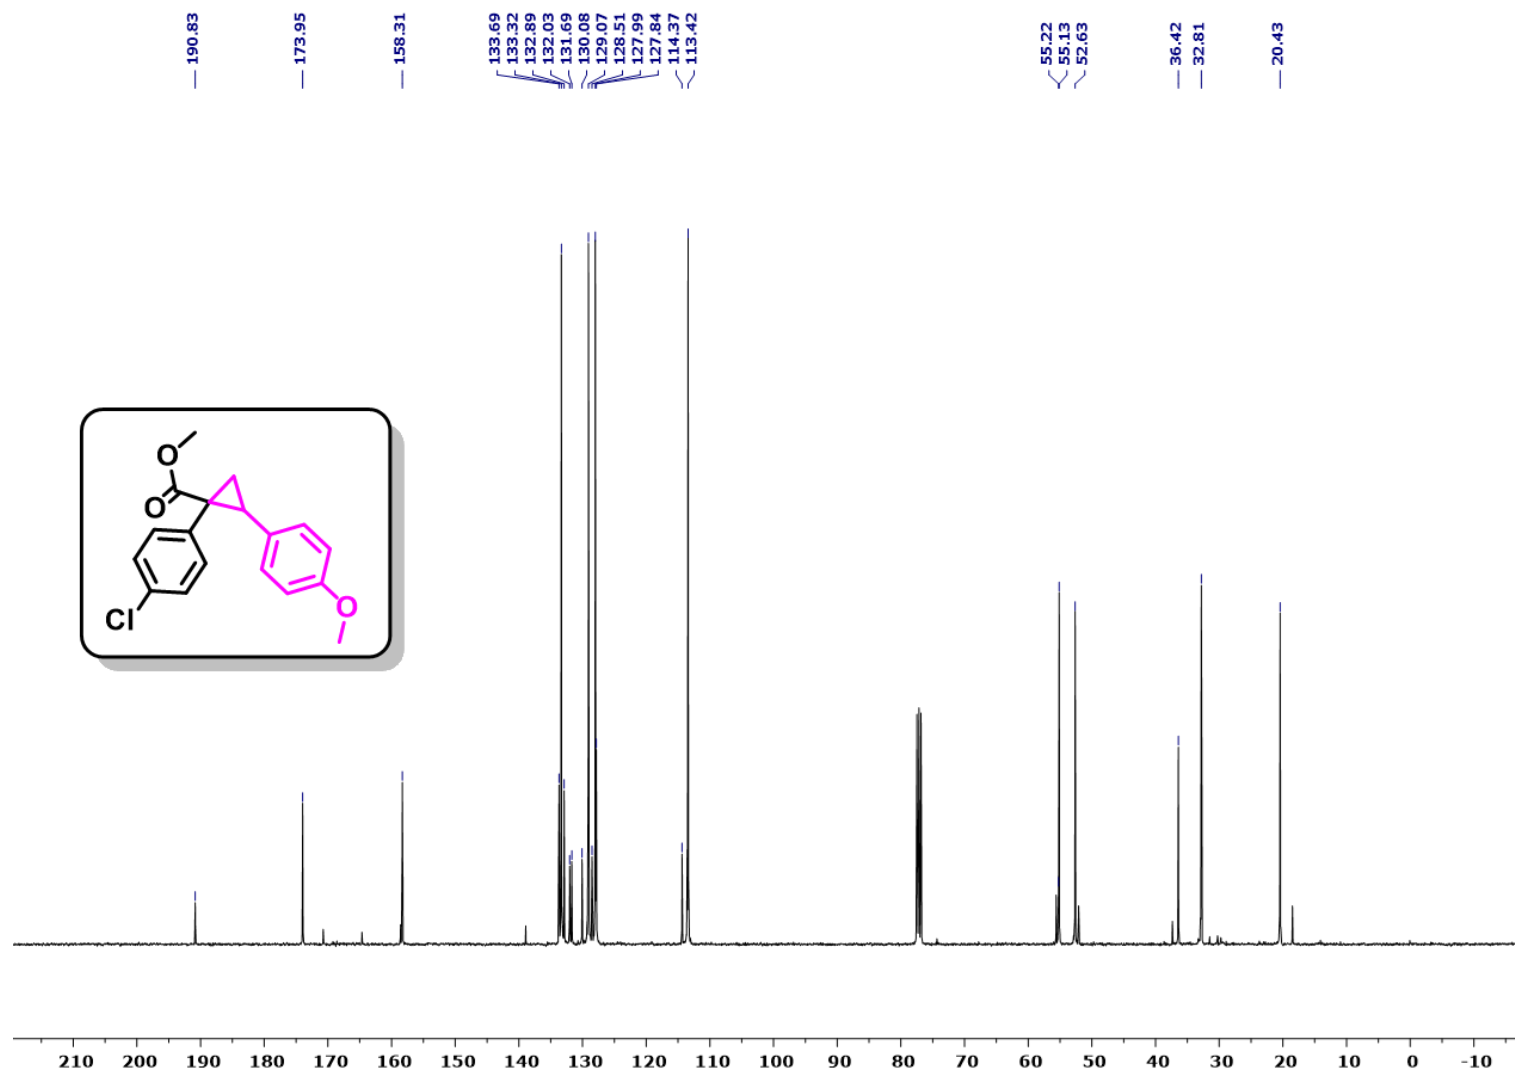

**Fig. S169.** <sup>13</sup>C NMR (101 MHz, CDCl<sub>3</sub>) spectra of methyl 1-(4-chlorophenyl)-2-(4-methoxyphenyl)cyclopropane-1-carboxylate (**10c**).

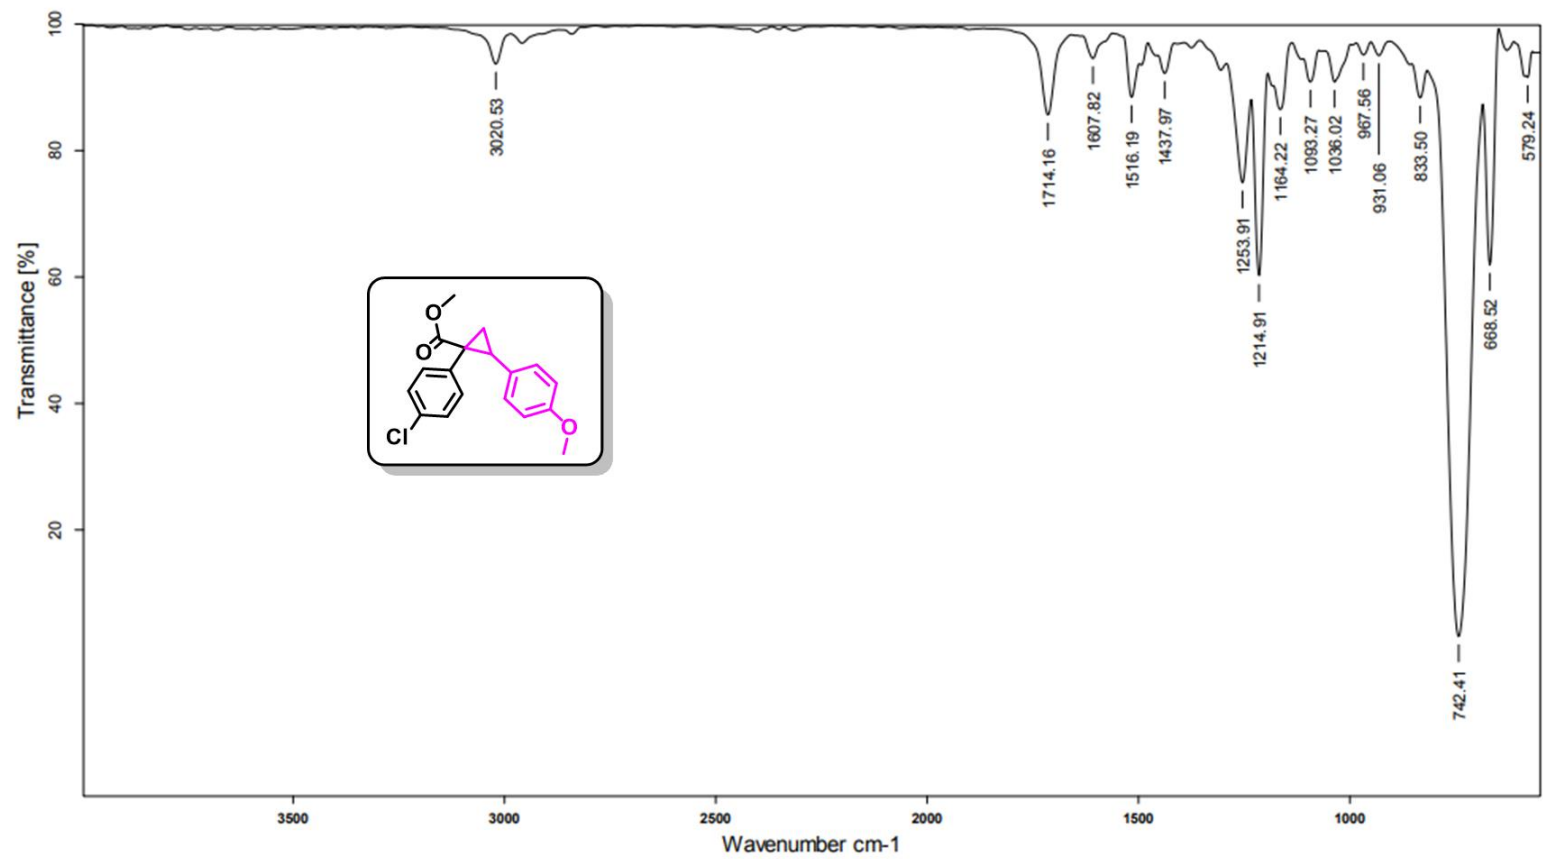

**Fig. S170.** IR spectra of spectra of methyl 1-(4-chlorophenyl)-2-(4-methoxyphenyl)cyclopropane-1-carboxylate (**10c**).

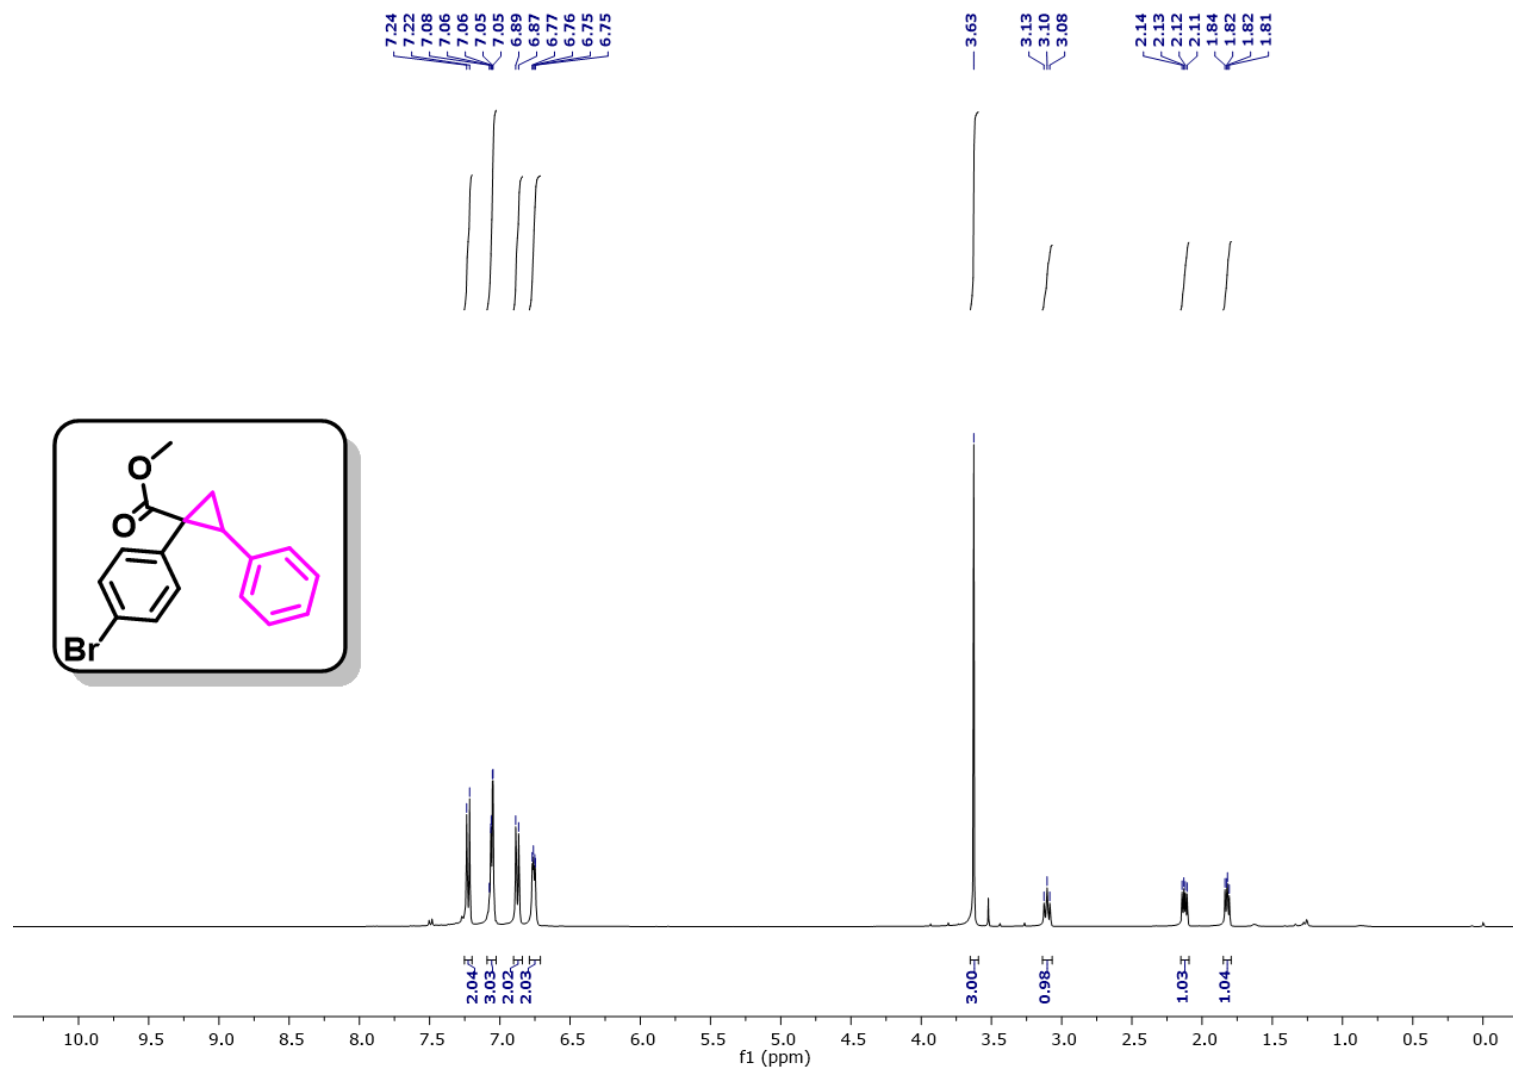

**Fig. S171.** <sup>1</sup>H NMR (400 MHz, CDCl<sub>3</sub>) spectra of methyl 1-(4-bromophenyl)-2-phenylcyclopropane-1-carboxylate (**10d**).

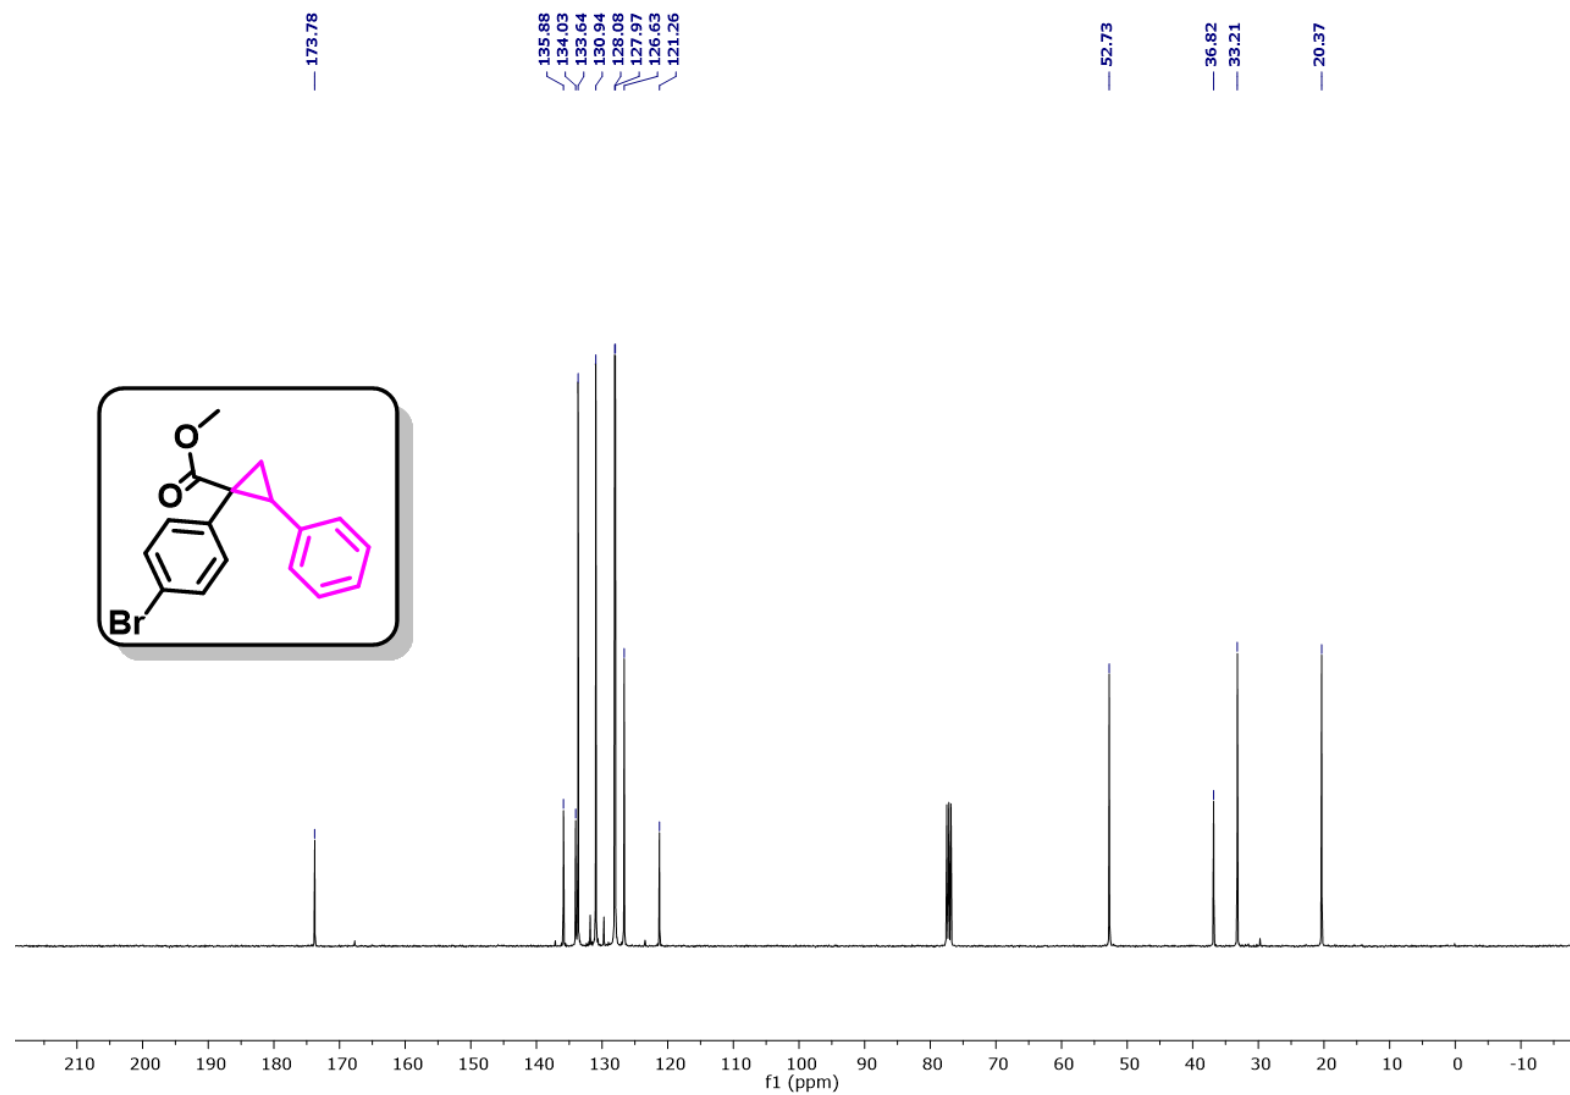

**Fig. S172.**  $^{13}\text{C}$  NMR (101 MHz,  $\text{CDCl}_3$ ) spectra of methyl 1-(4-bromophenyl)-2-phenylcyclopropane-1-carboxylate (**10d**).

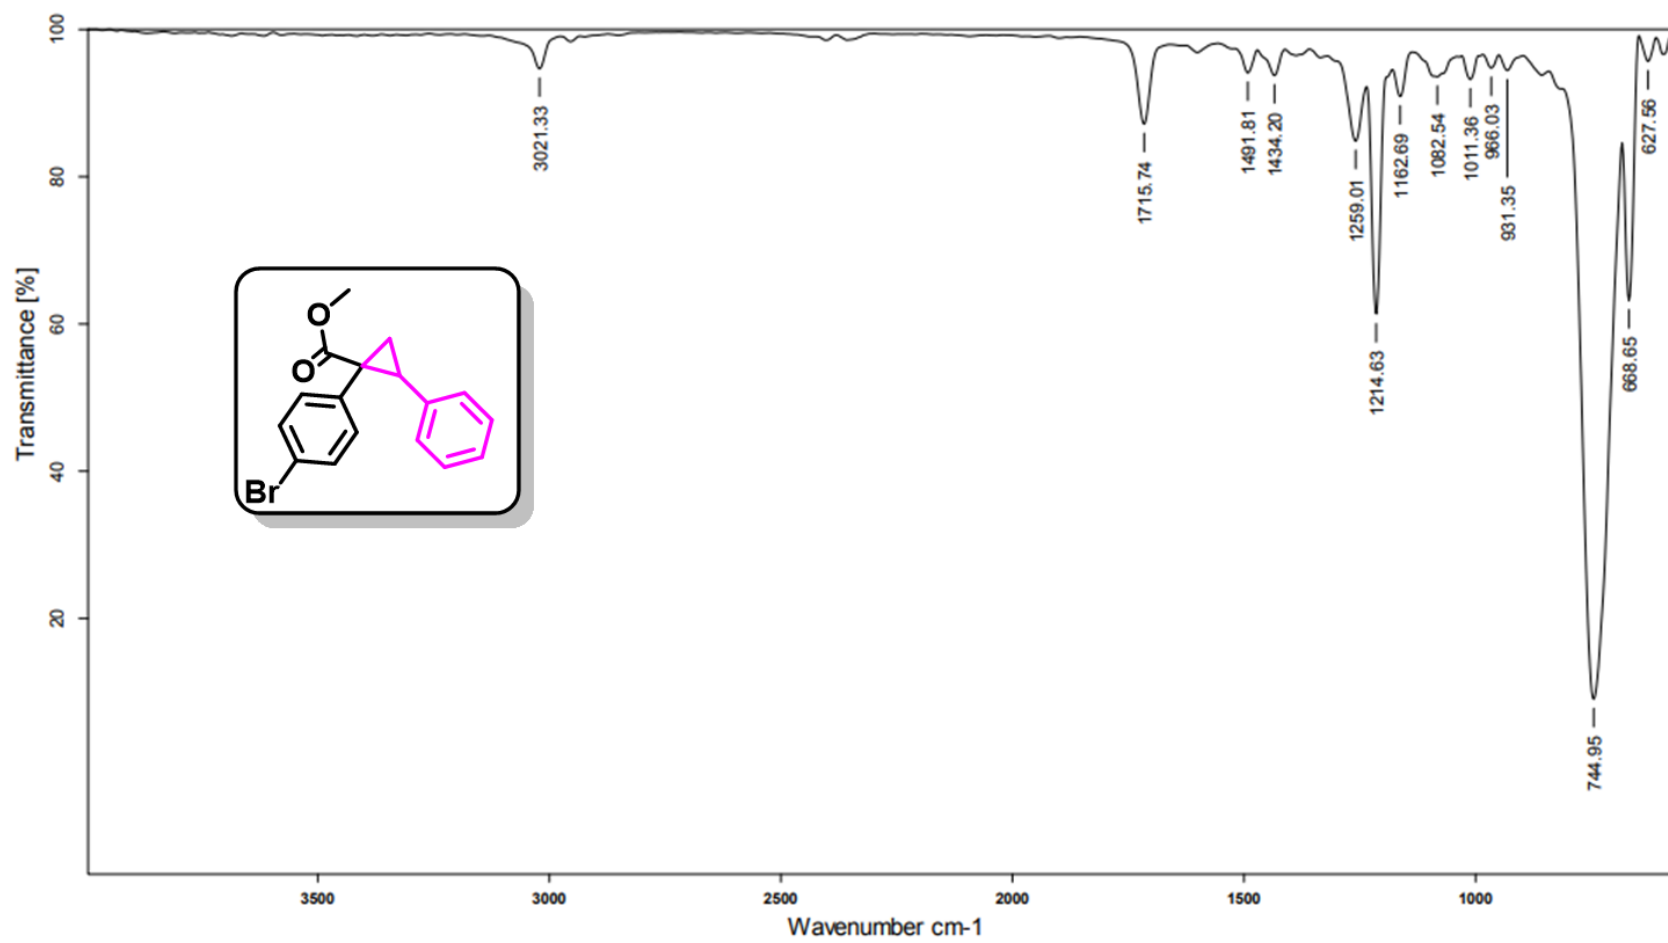

**Fig. S173.** IR spectra of spectra of methyl 1-(4-bromophenyl)-2-phenylcyclopropane-1-carboxylate (**10d**).

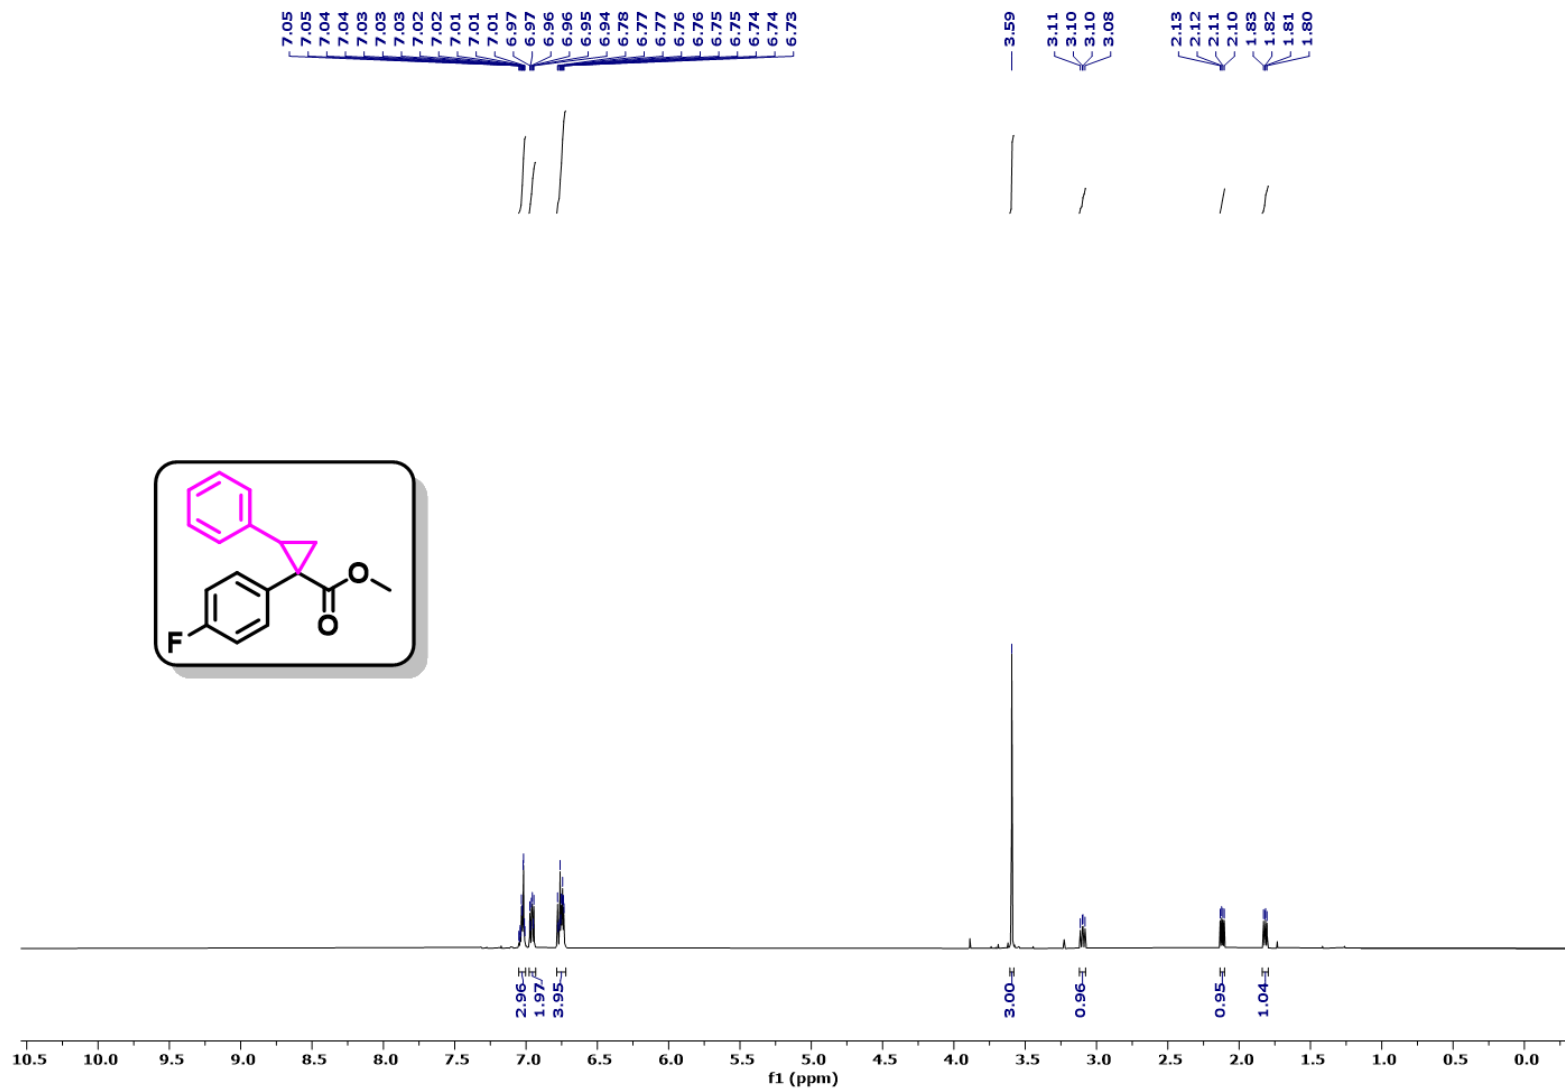

**Fig. S174.** <sup>1</sup>H NMR (500 MHz, CDCl<sub>3</sub>) spectra of methyl 1-(4-fluorophenyl)-2-phenylcyclopropane-1-carboxylate (**10e**).

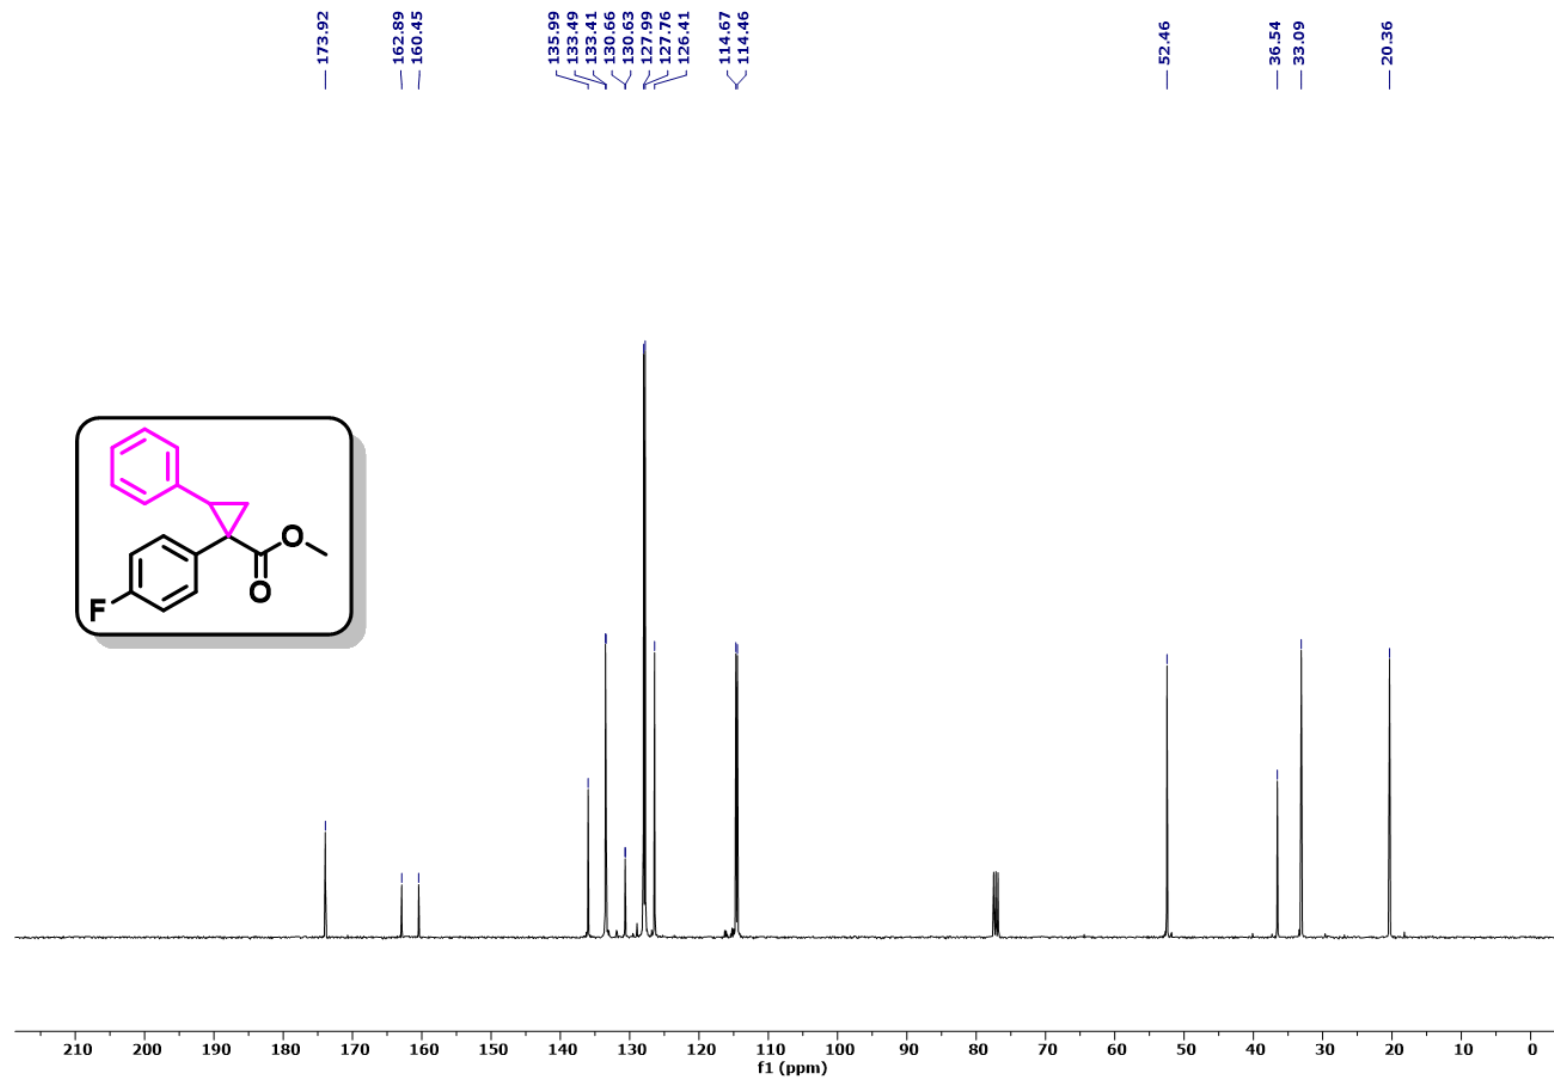

**Fig. S175.**  $^{13}\text{C}$  NMR (101 MHz,  $\text{CDCl}_3$ ) spectra of methyl 1-(4-fluorophenyl)-2-phenylcyclopropane-1-carboxylate (**10e**).



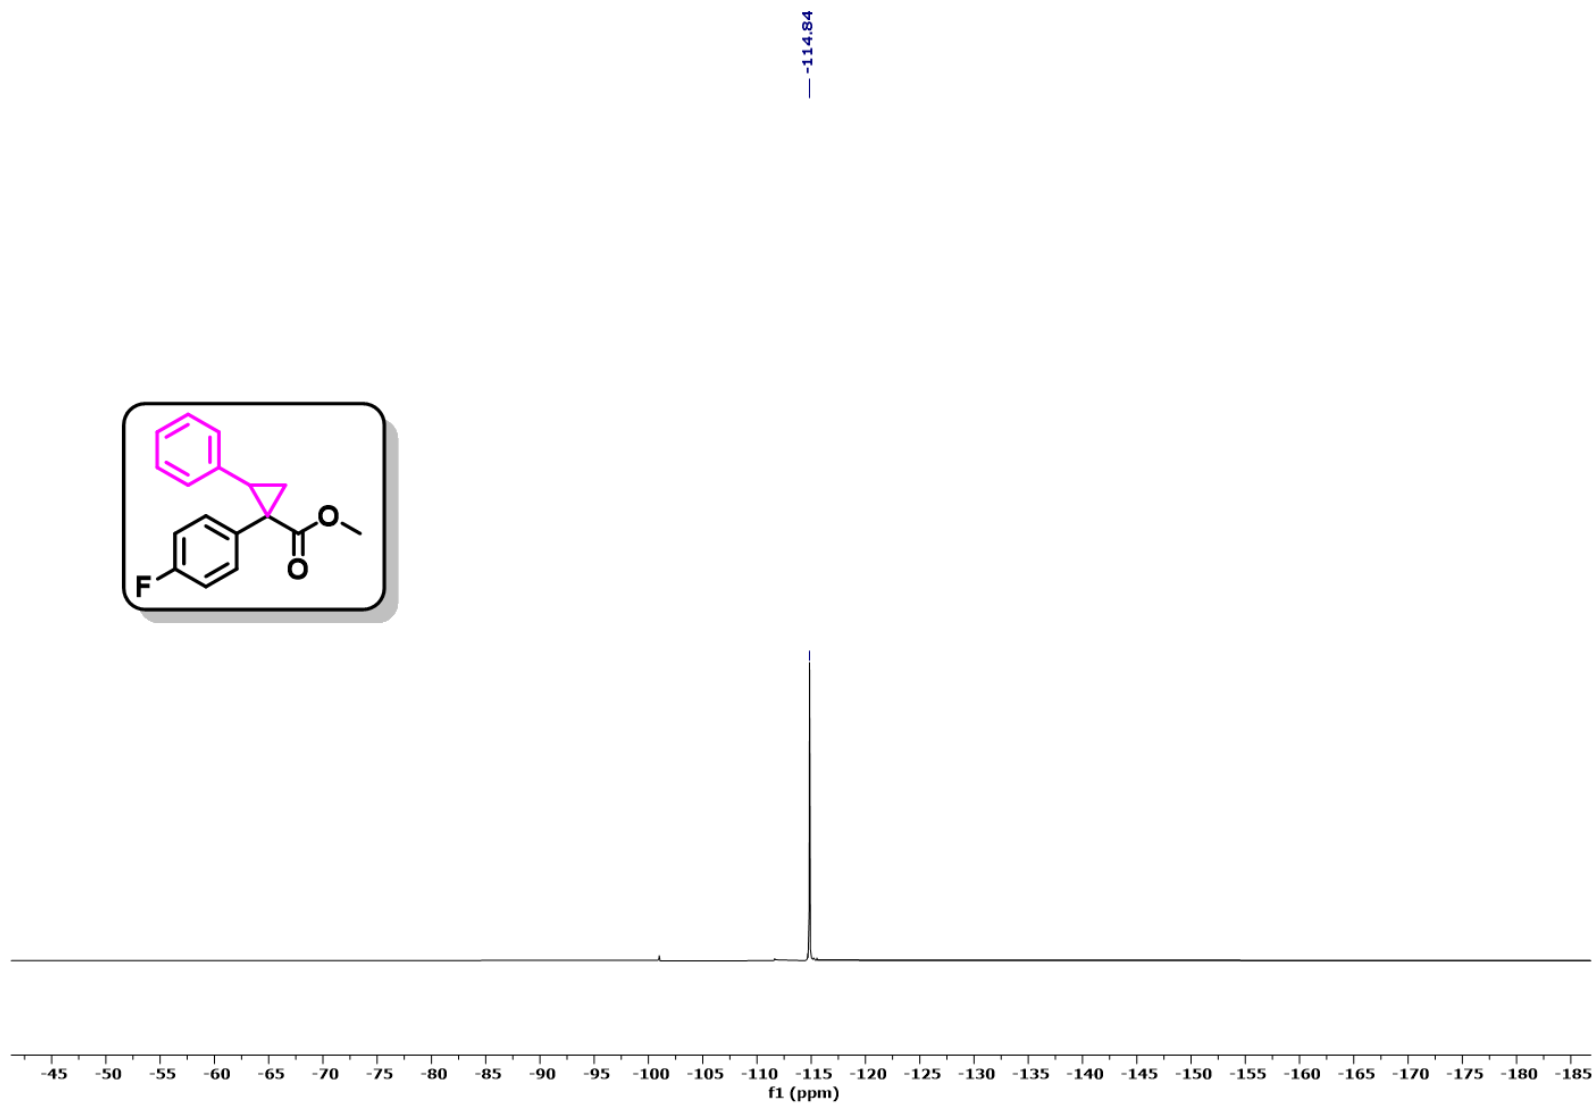

**Fig. S176.**  $^{19}\text{F}$  NMR (377 MHz,  $\text{CDCl}_3$ ) spectra of methyl 1-(4-fluorophenyl)-2-phenylcyclopropane-1-carboxylate (**10e**).

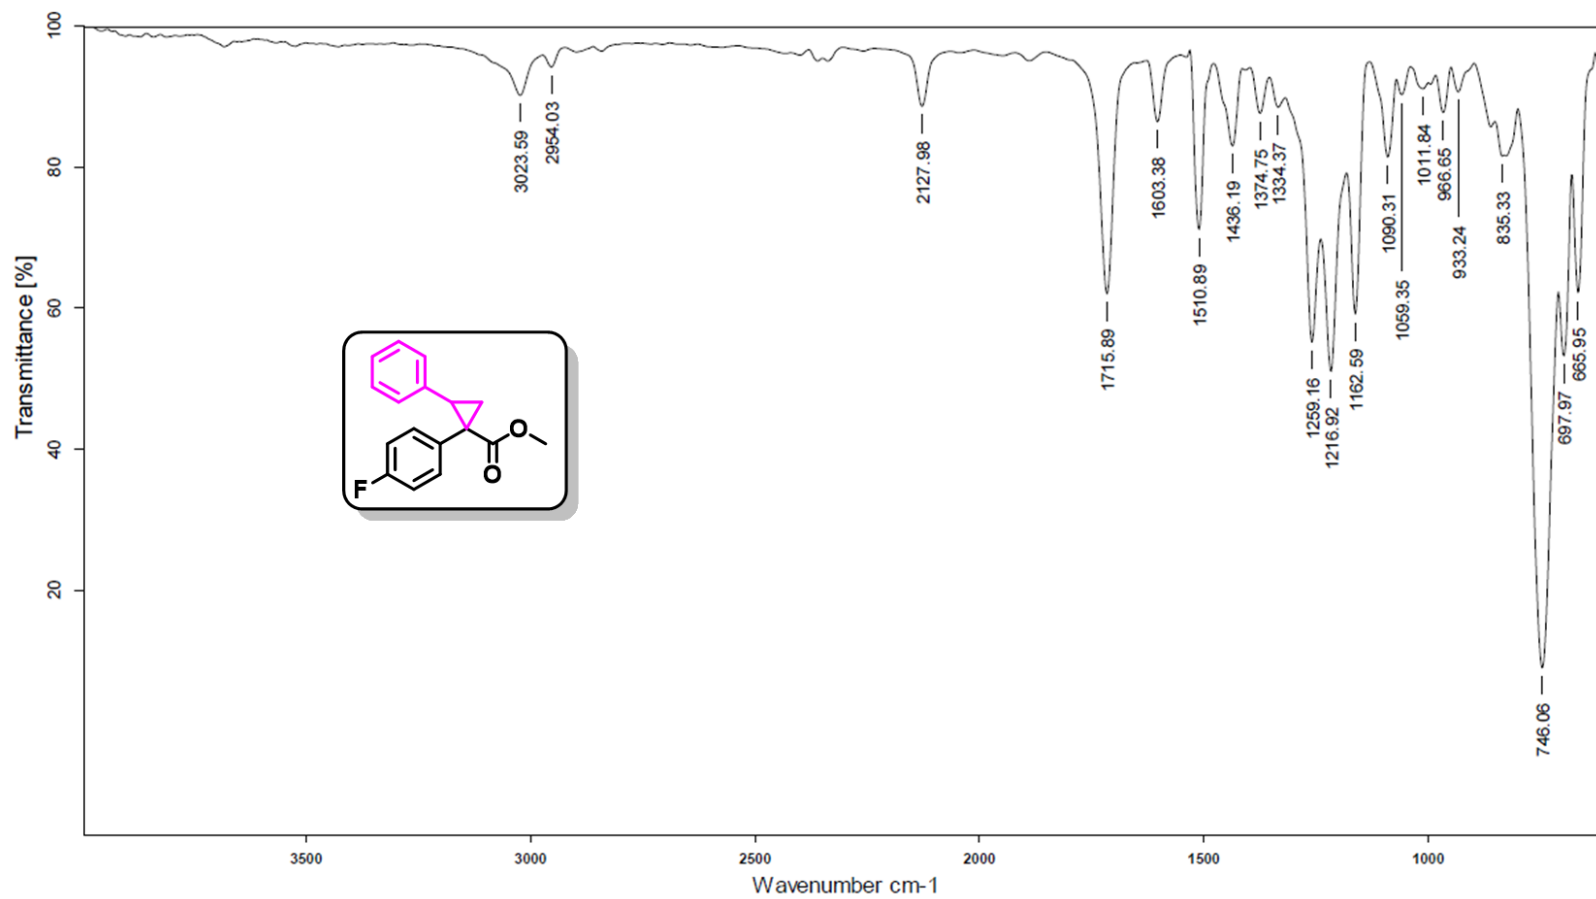

**Fig. S177.** IR spectra of spectra of methyl 1-(4-fluorophenyl)-2-phenylcyclopropane-1-carboxylate (**10e**).

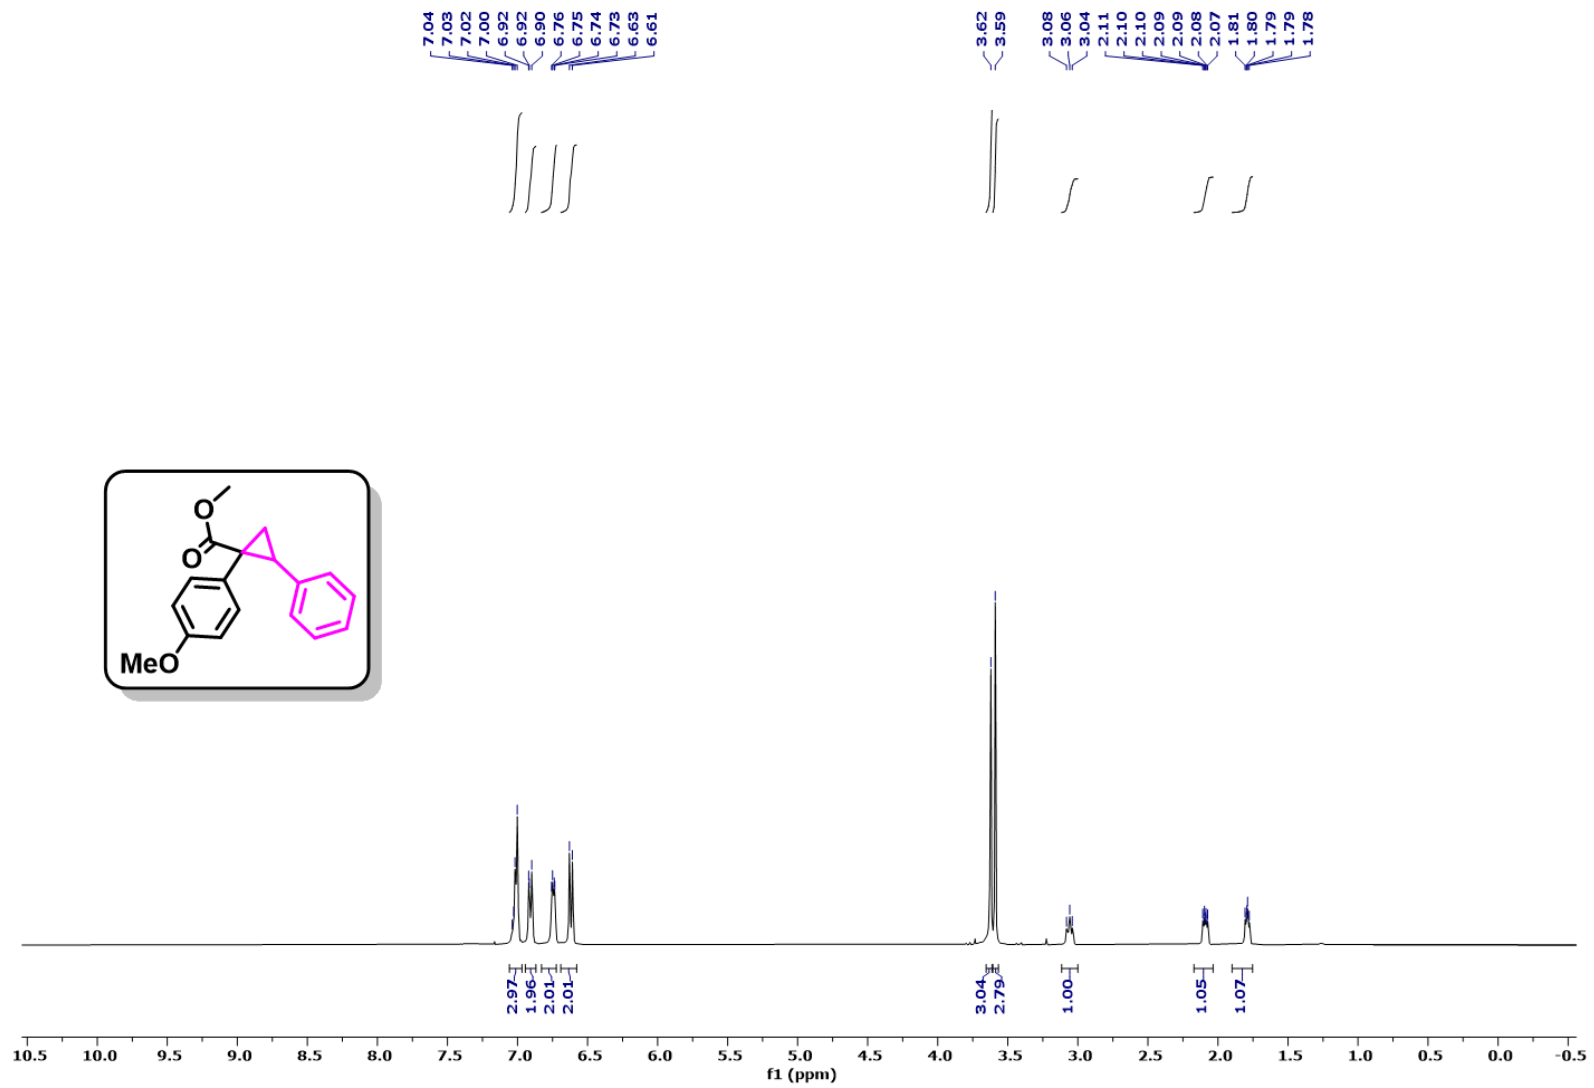

**Fig. S178.** <sup>1</sup>H NMR (400 MHz, CDCl<sub>3</sub>) spectra of methyl 1-(4-methoxyphenyl)-2-phenylcyclopropane-1-carboxylate (**10f**).

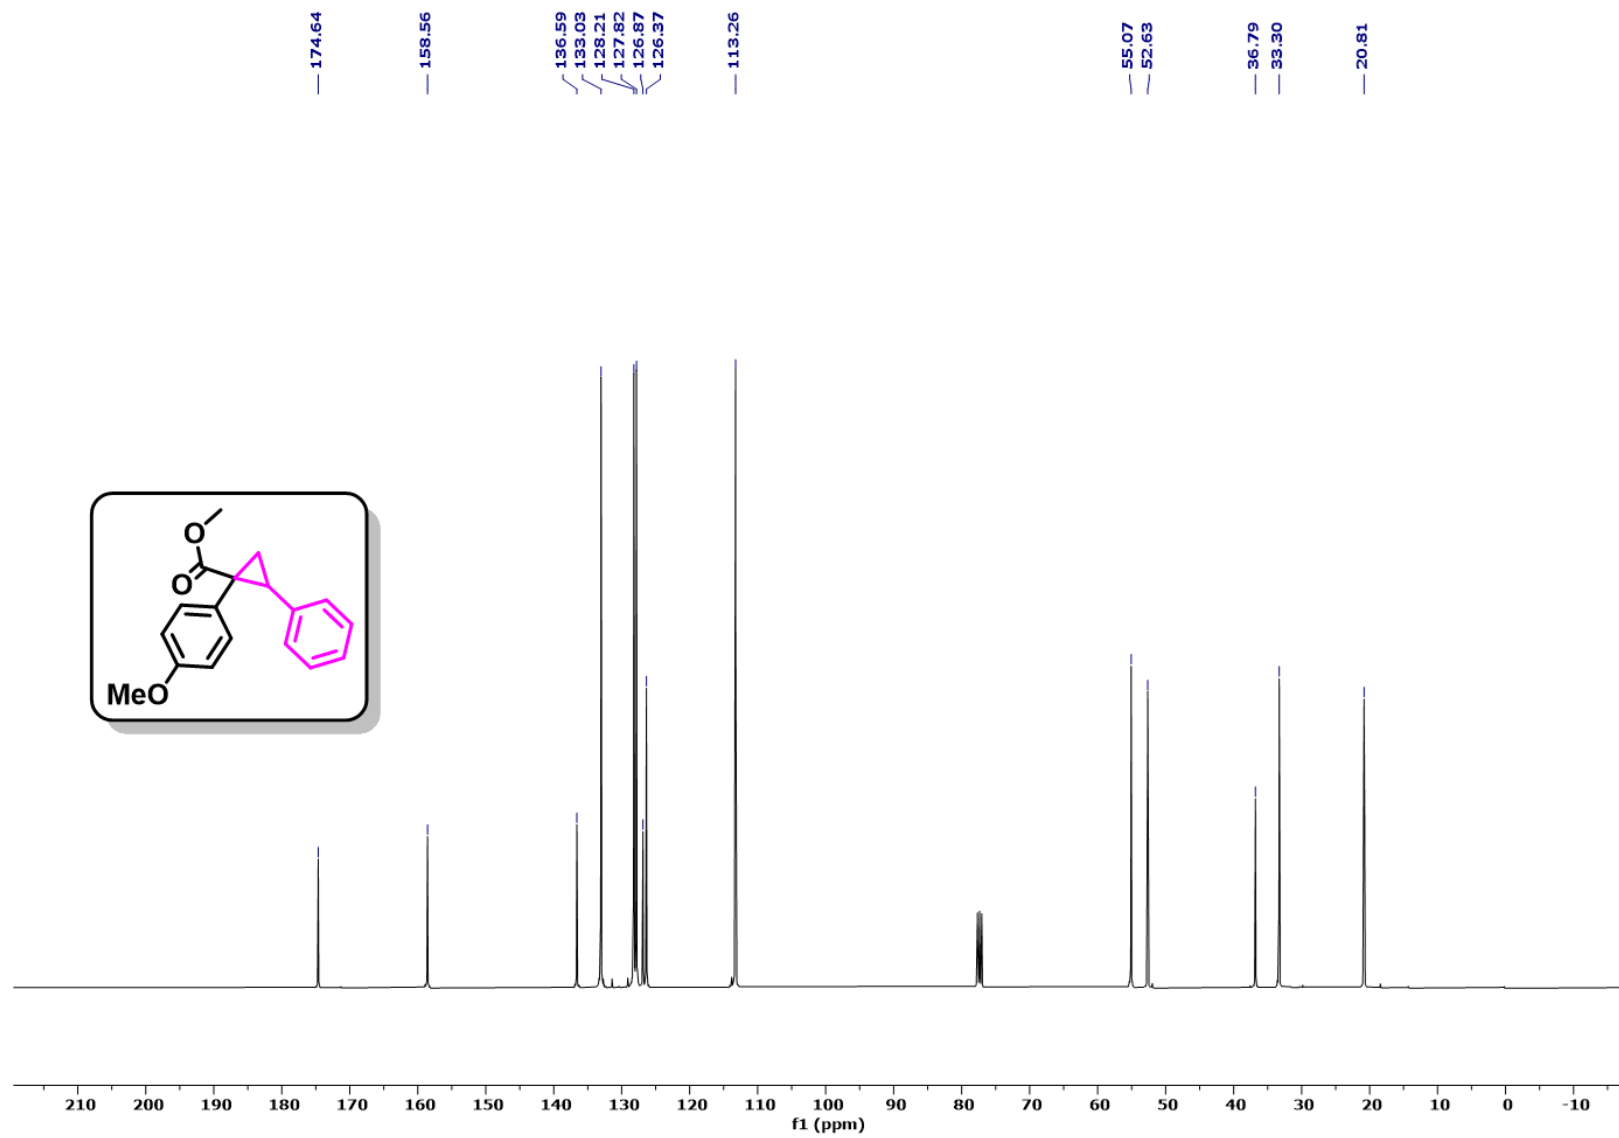

**Fig. S179.**  $^{13}\text{C}$  NMR (101 MHz,  $\text{CDCl}_3$ ) spectra of methyl 1-(4-methoxyphenyl)-2-phenylcyclopropane-1-carboxylate (**10f**).

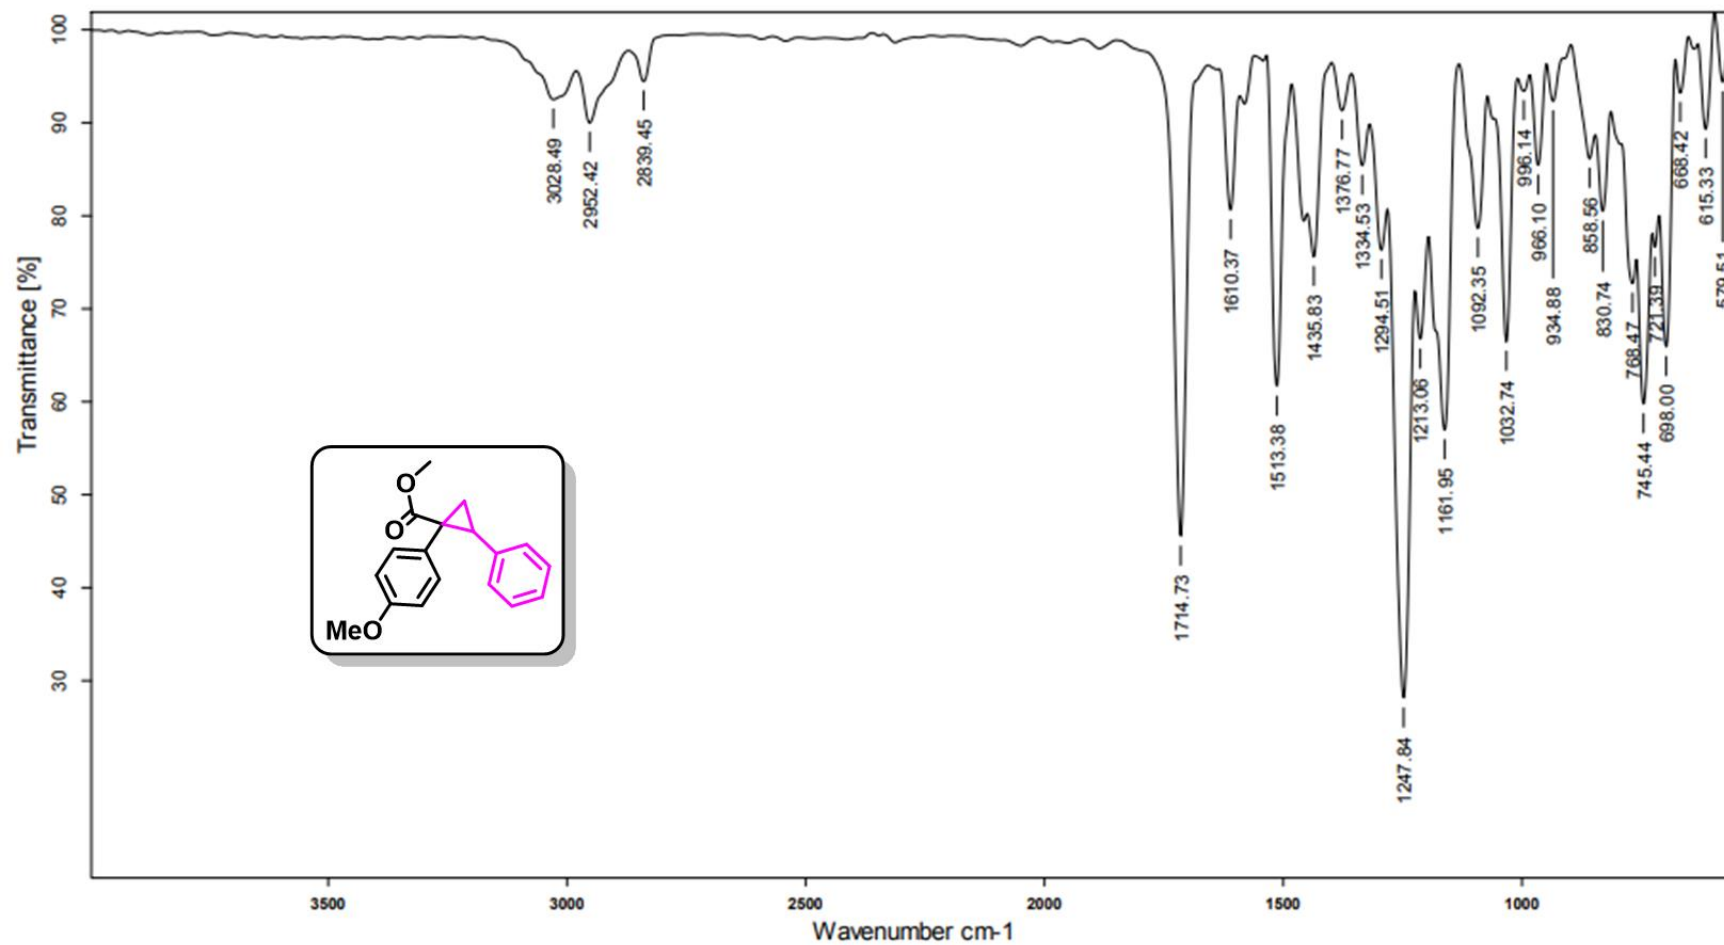

Fig. S180. IR spectra of spectra of methyl 1-(4-methoxyphenyl)-2-phenylcyclopropane-1-carboxylate (10f).

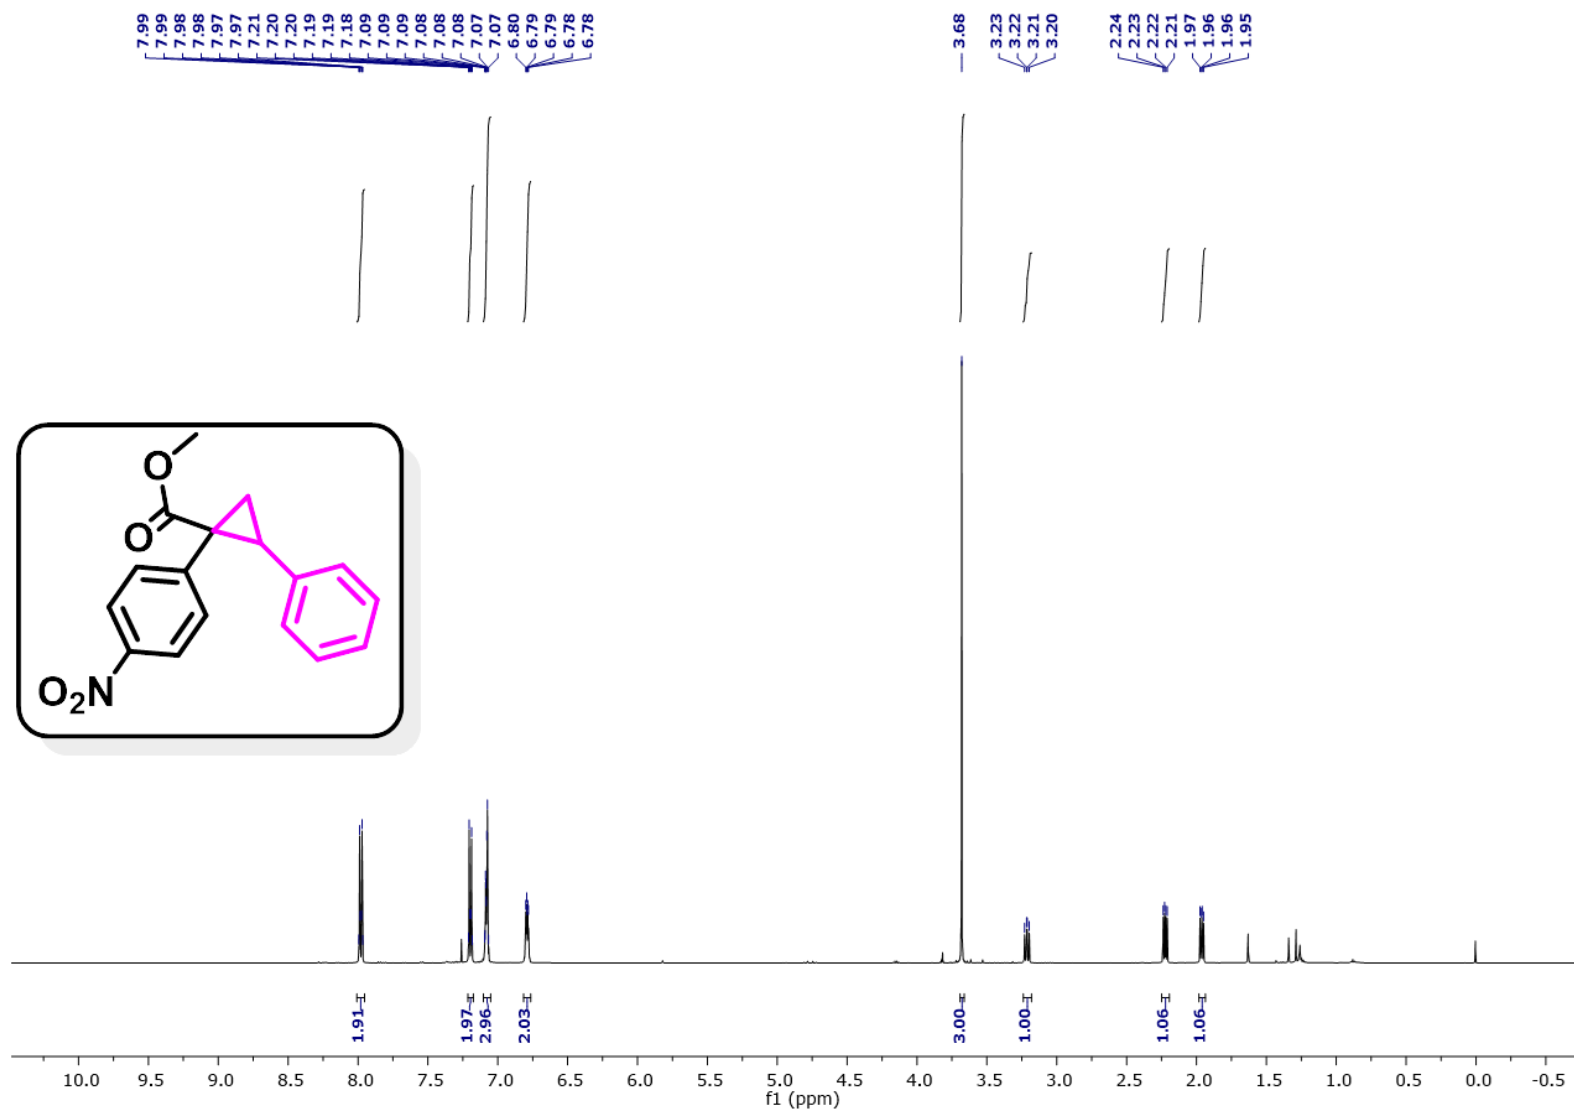

**Fig. S181.** <sup>1</sup>H NMR (500 MHz, CDCl<sub>3</sub>) spectra of methyl 1-(4-nitrophenyl)-2-phenylcyclopropane-1-carboxylate (**10g**).

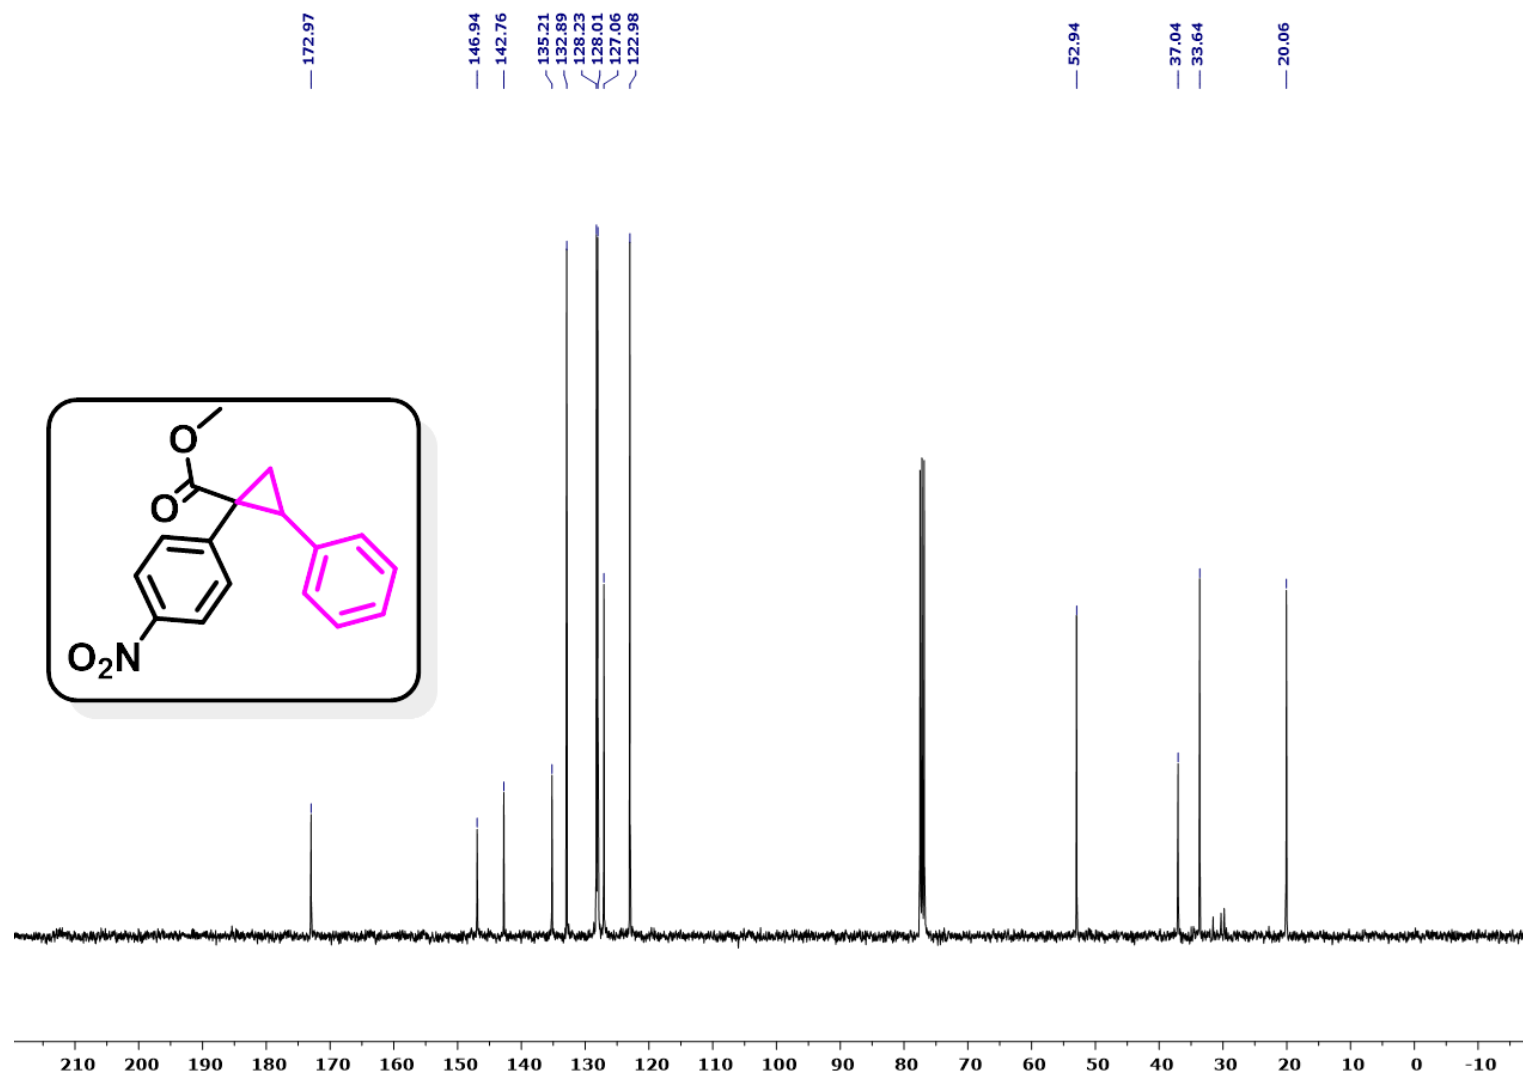

**Fig. S182.**  $^{13}\text{C}$  NMR (101 MHz,  $\text{CDCl}_3$ ) spectra of methyl 1-(4-nitrophenyl)-2-phenylcyclopropane-1-carboxylate (**10g**).

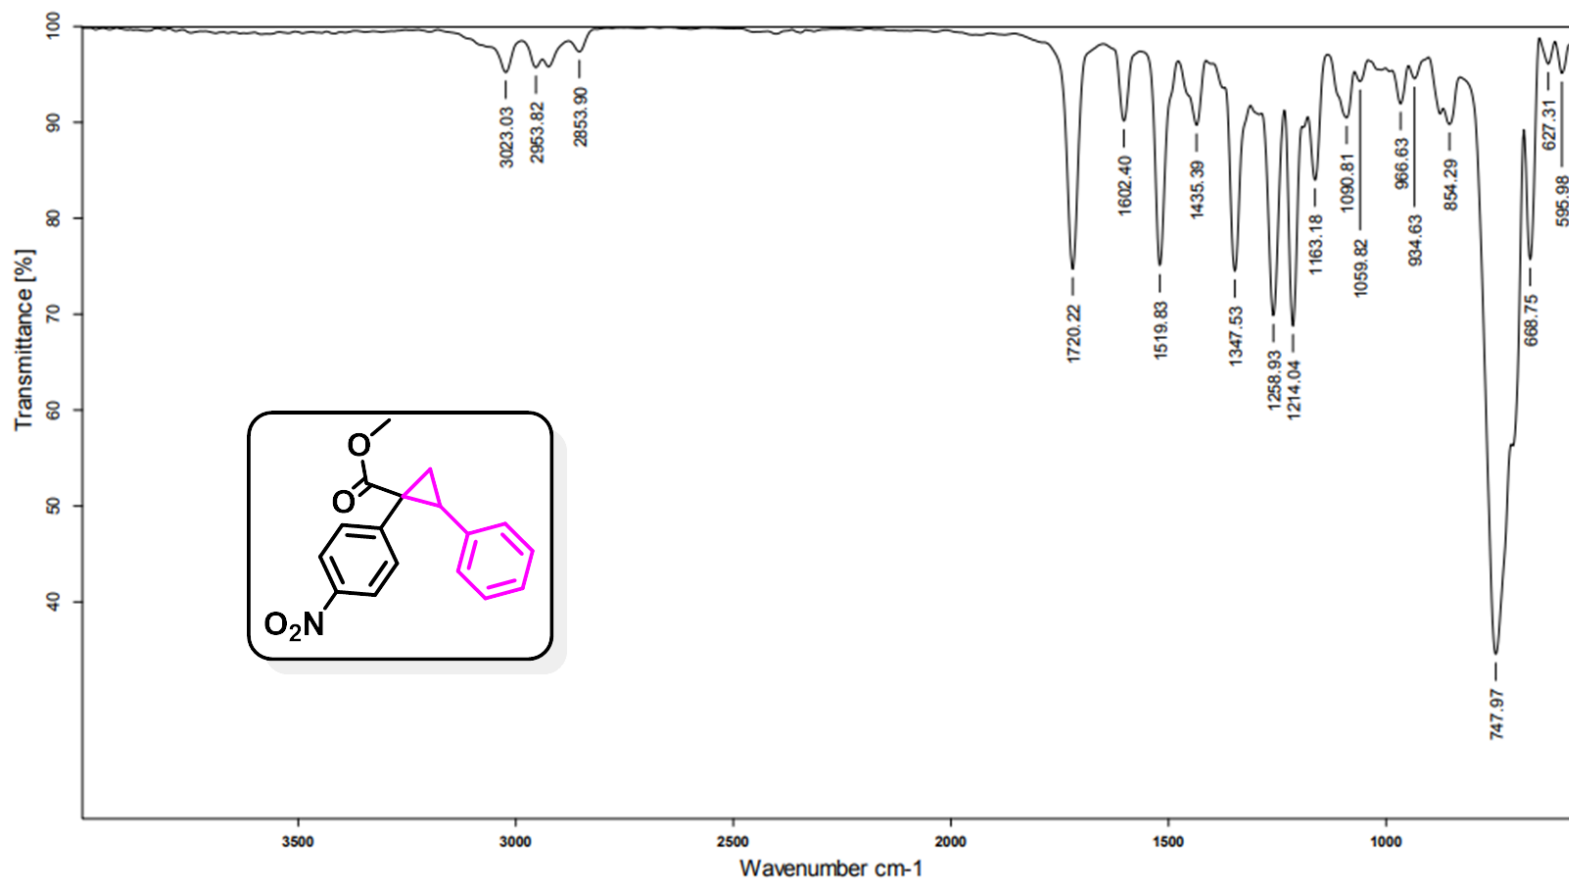

**Fig. S183.** IR spectra of spectra of methyl 1-(4-nitrophenyl)-2-phenylcyclopropane-1-carboxylate (**10g**).



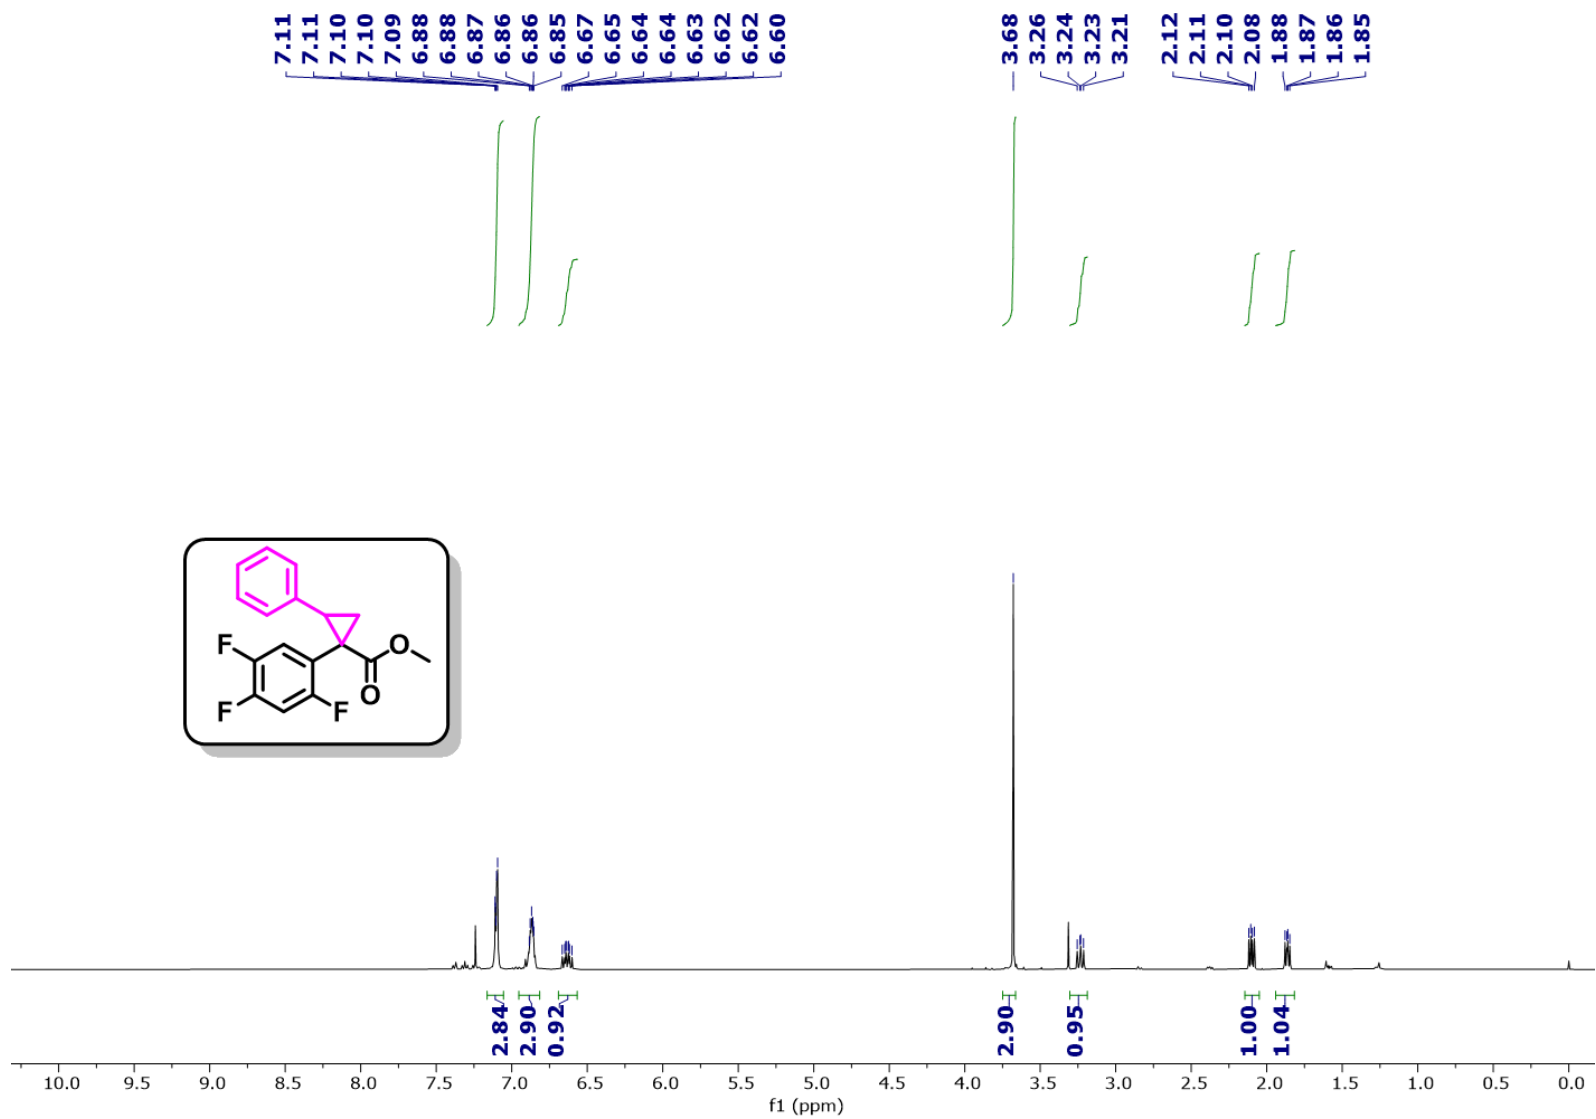

**Fig. S184.** <sup>1</sup>H NMR (400 MHz, CDCl<sub>3</sub>) spectra of methyl 2-phenyl-1-(2,4,5-trifluorophenyl)cyclopropane-1-carboxylate (**10h**).

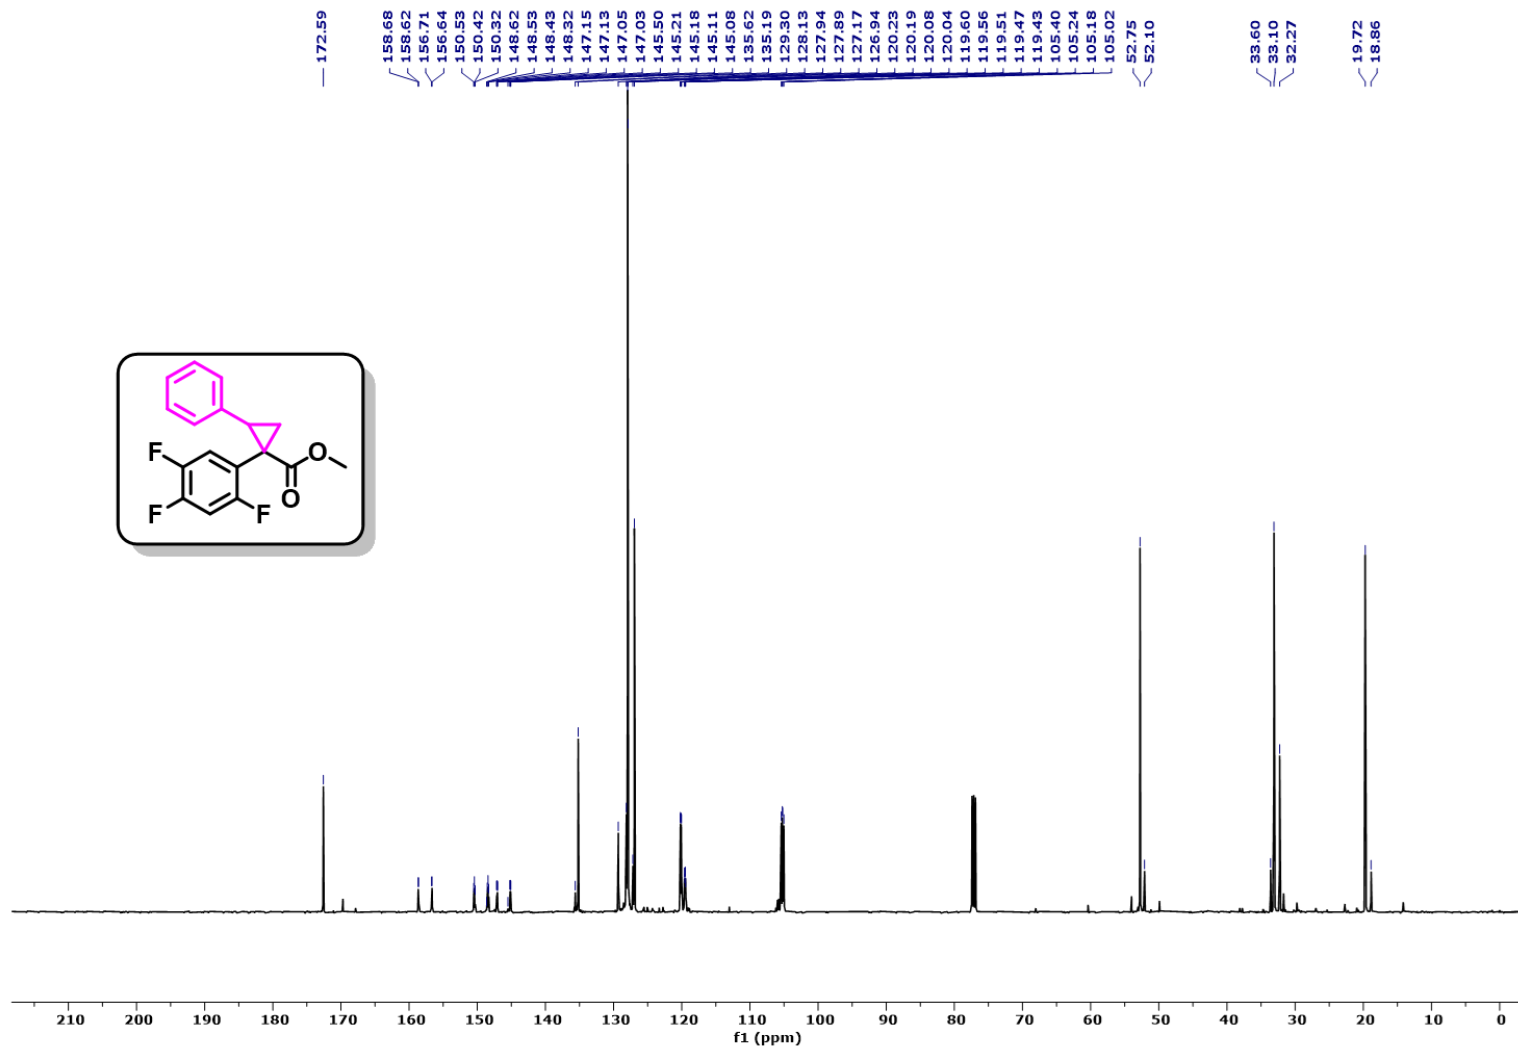

**Fig. S185.** <sup>13</sup>C NMR (126 MHz, CDCl<sub>3</sub>) spectra of methyl methyl 2-phenyl-1-(2,4,5-trifluorophenyl)cyclopropane-1-carboxylate (**10h**).

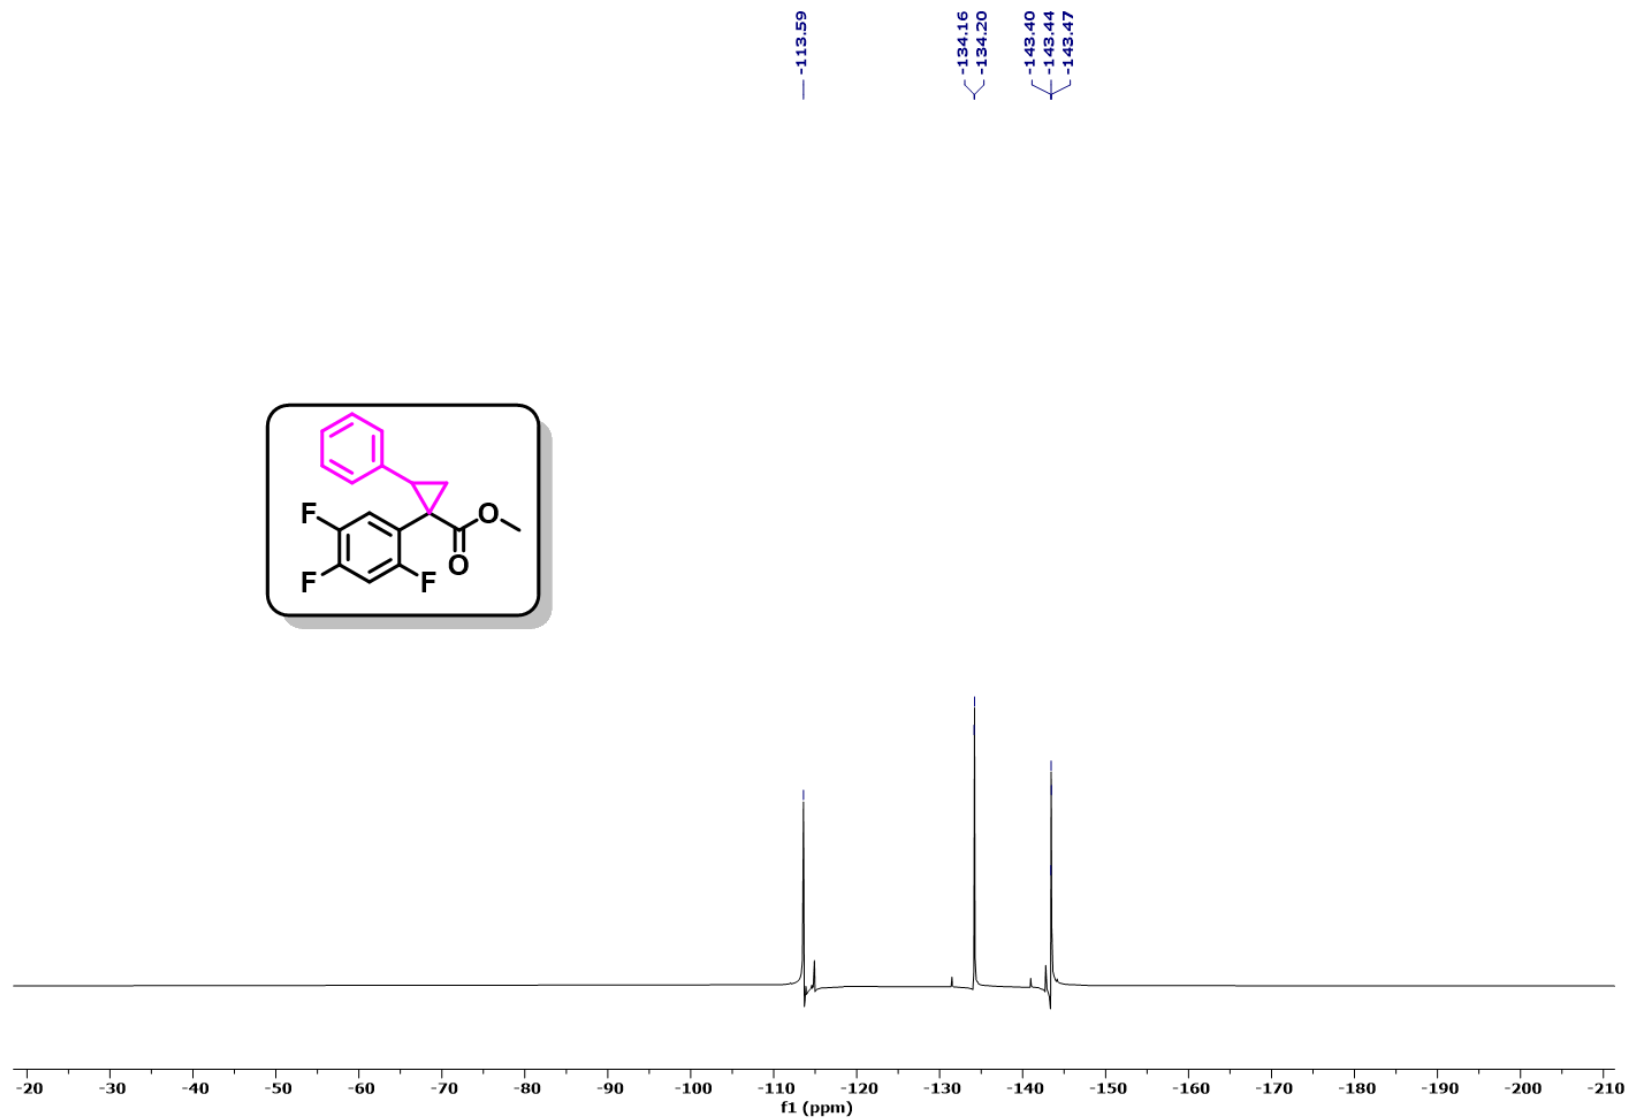

**Fig. S186.**  $^{19}\text{F}$  NMR (471 MHz,  $\text{CDCl}_3$ ) spectra of methyl 2-phenyl-1-(2,4,5-trifluorophenyl)cyclopropane-1-carboxylate (**10h**).

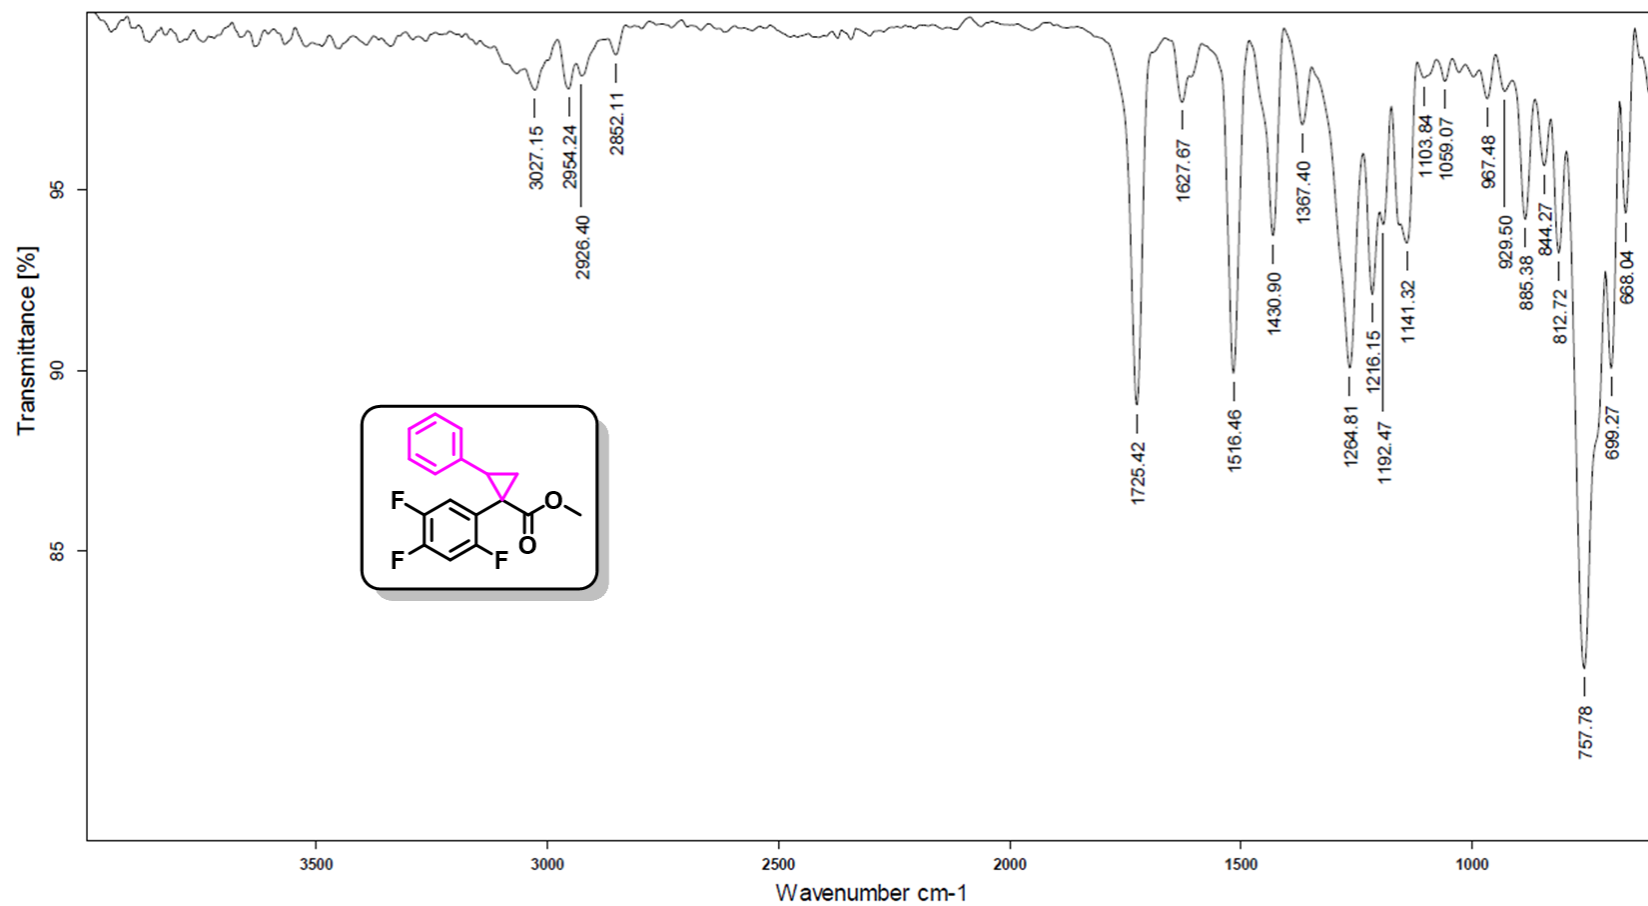

**Fig. S187.** IR spectra of spectra of methyl 2-phenyl-1-(2,4,5-trifluorophenyl)cyclopropane-1-carboxylate (**10h**).

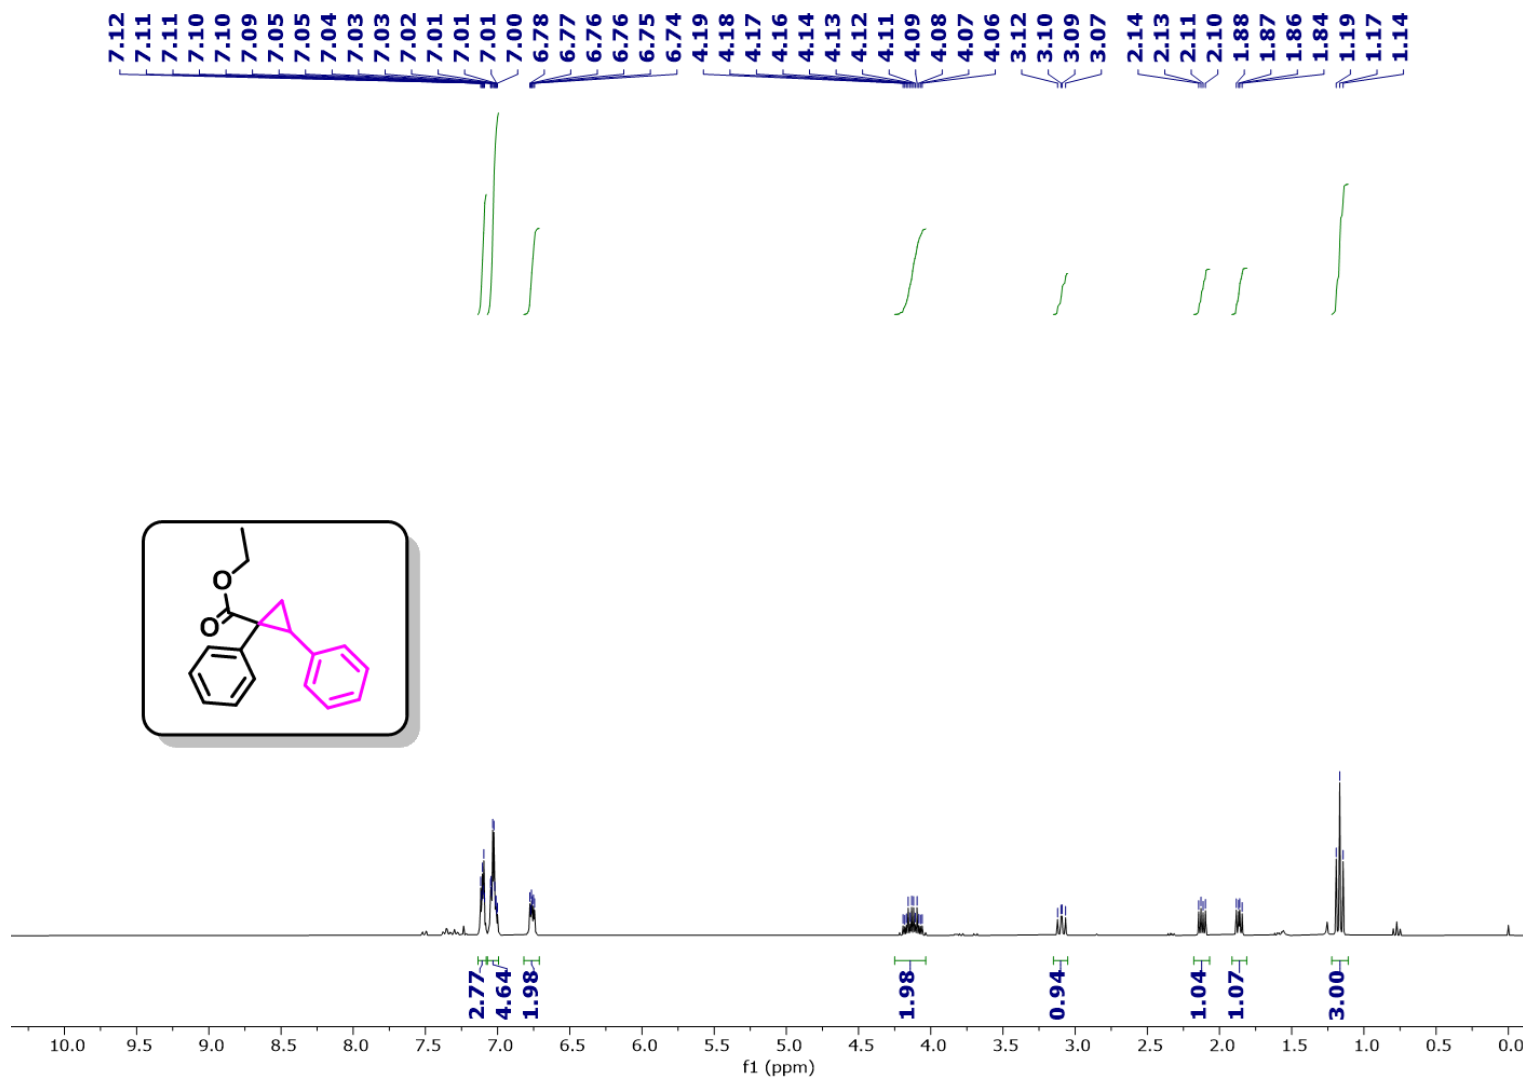

**Fig. S188.** <sup>1</sup>H NMR (300 MHz, CDCl<sub>3</sub>) spectra of ethyl 1,2-diphenylcyclopropane-1-carboxylate (**10i**).

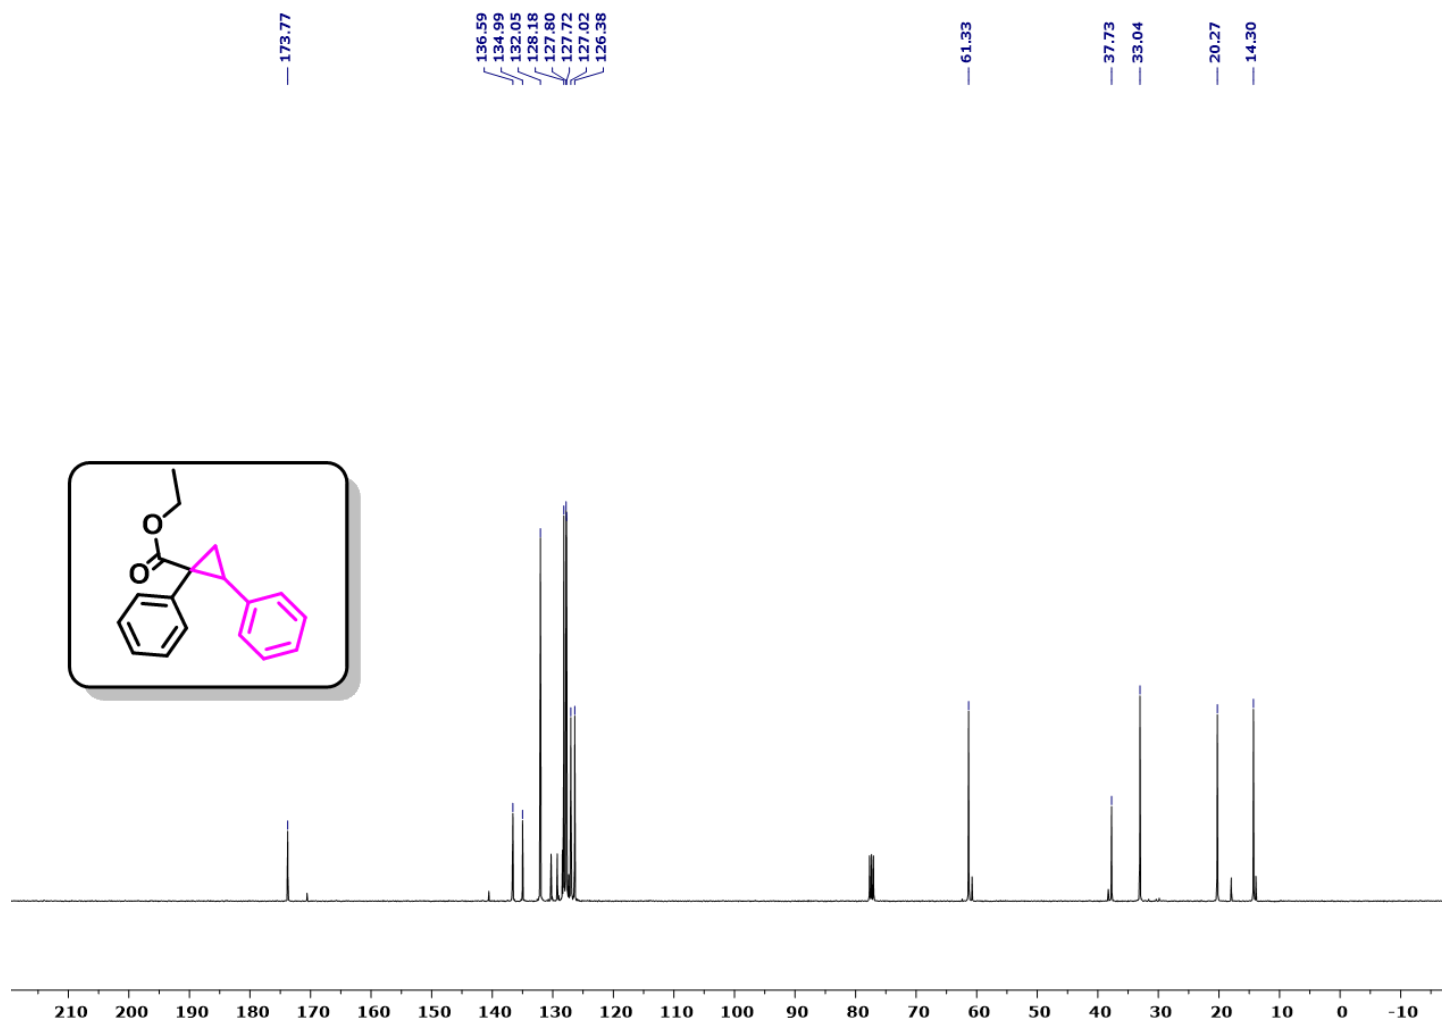

**Fig. S189.**  $^{13}\text{C}$  NMR (101 MHz,  $\text{CDCl}_3$ ) spectra of ethyl 1,2-diphenylcyclopropane-1-carboxylate (**10i**).

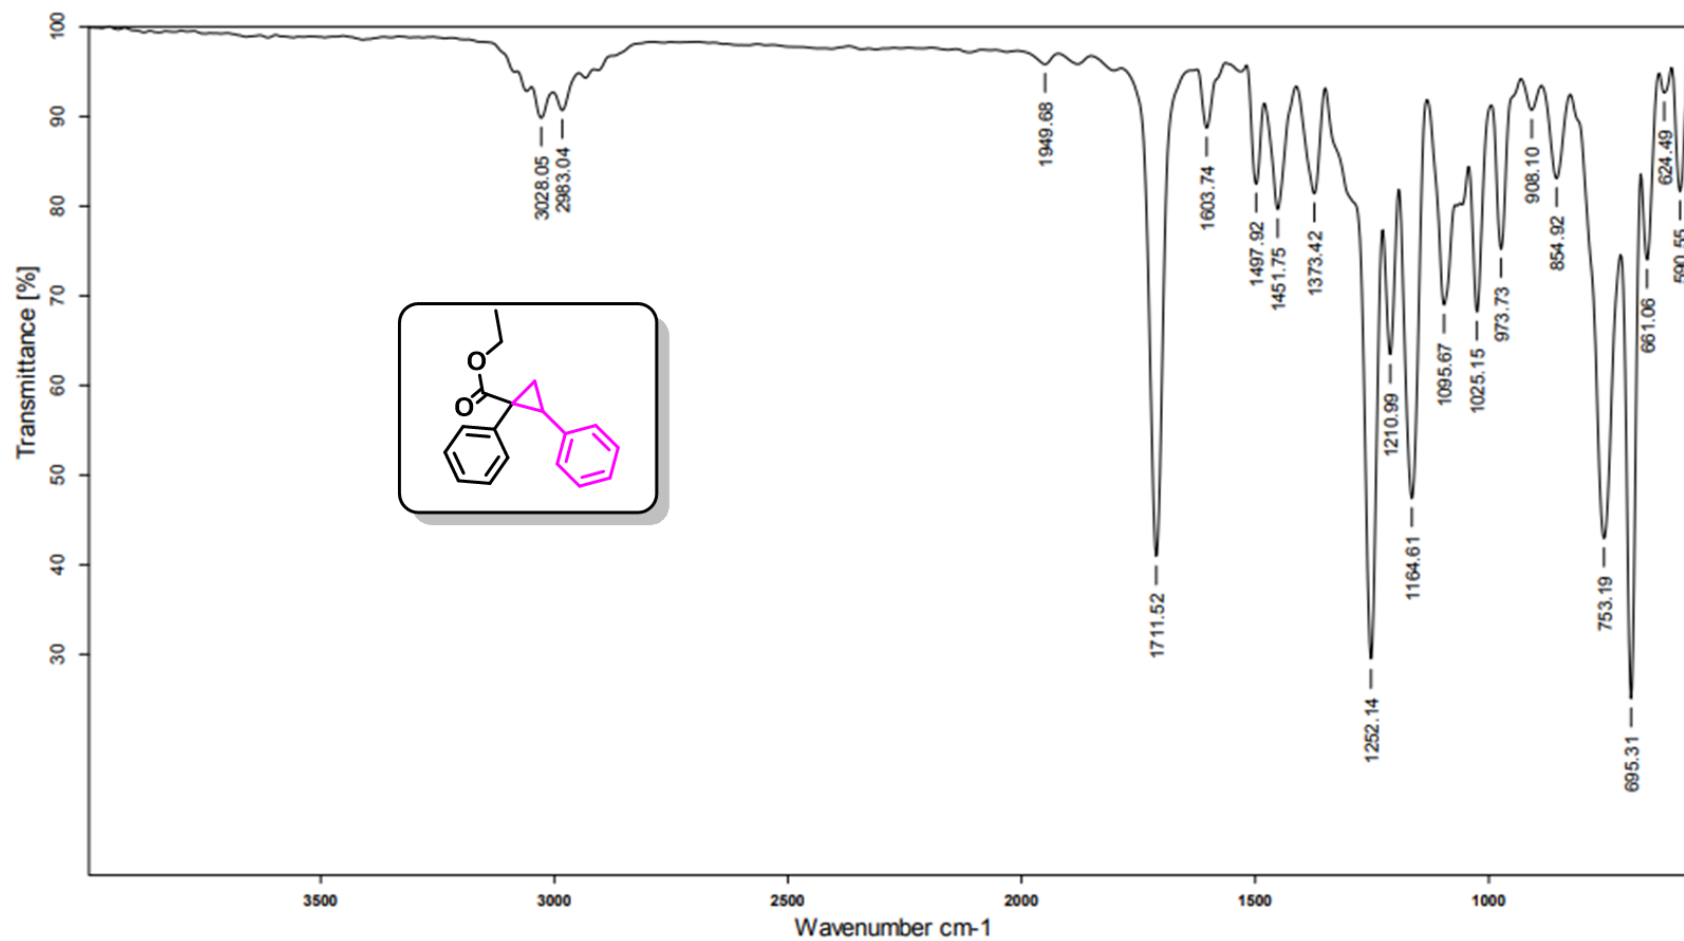

**Fig. S190.** IR spectra of spectra of ethyl 1,2-diphenylcyclopropane-1-carboxylate (**10i**).

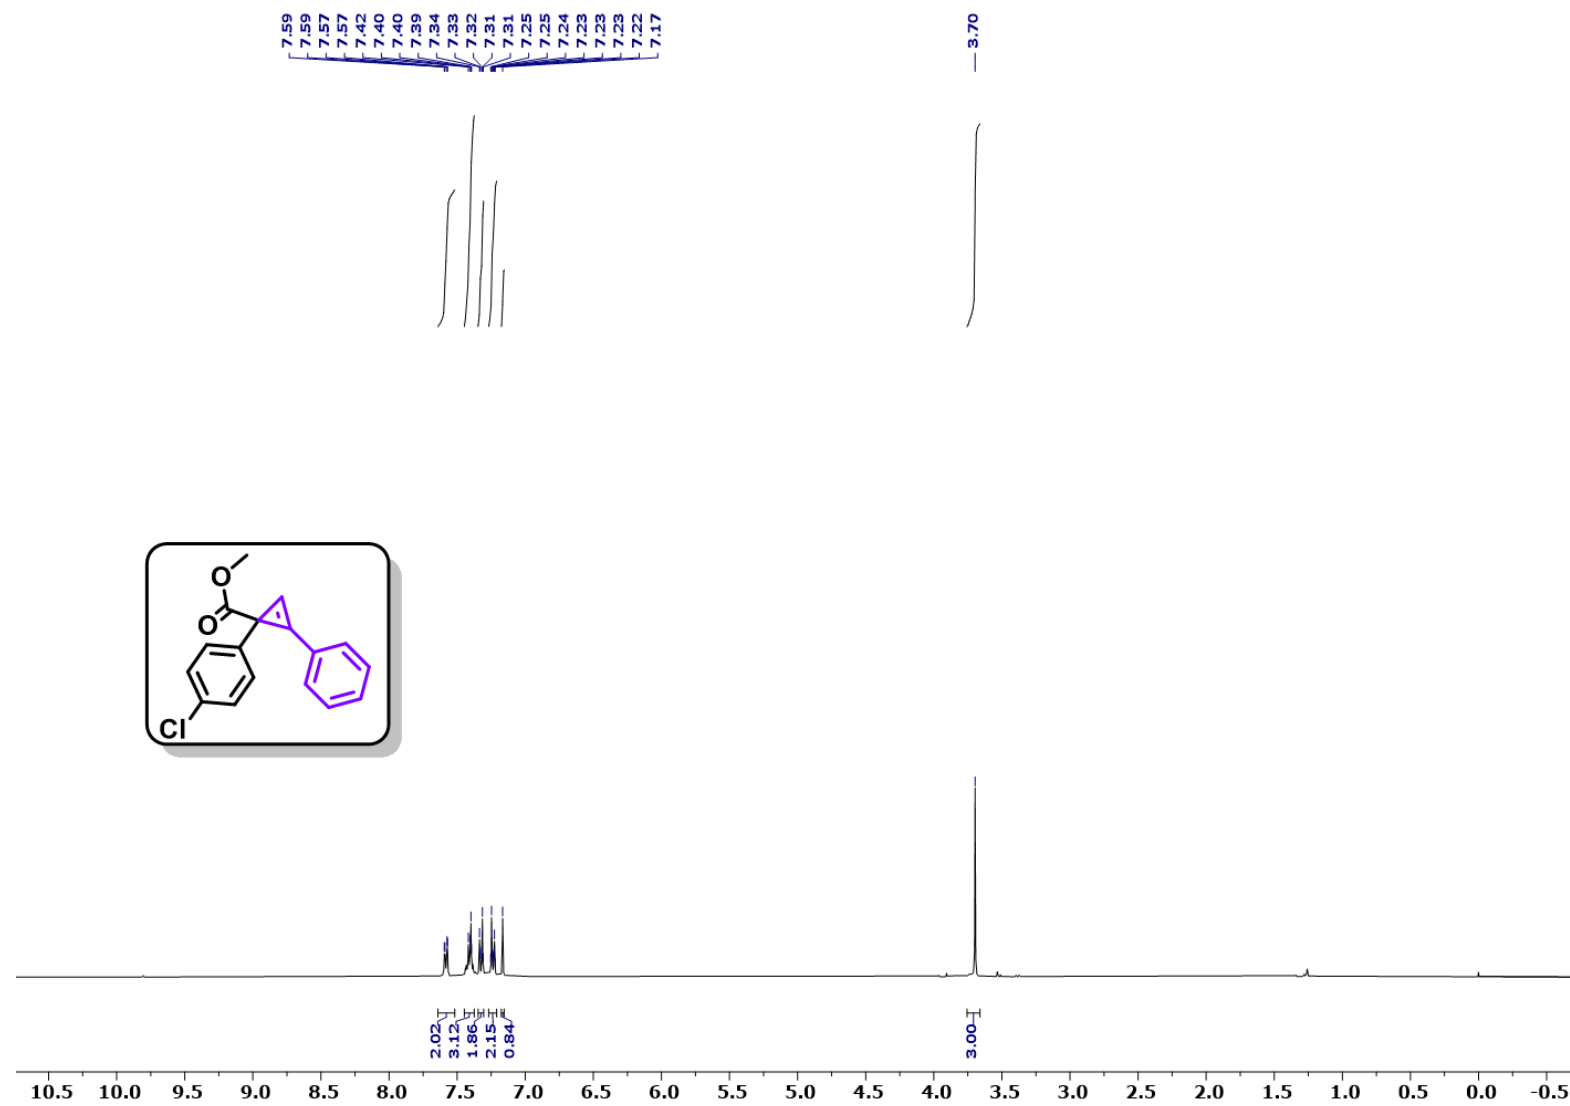

**Fig. S191.** <sup>1</sup>H NMR (400 MHz, CDCl<sub>3</sub>) spectra of methyl 1-(4-chlorophenyl)-2-phenylcycloprop-2-ene-1-carboxylate (**12a**).



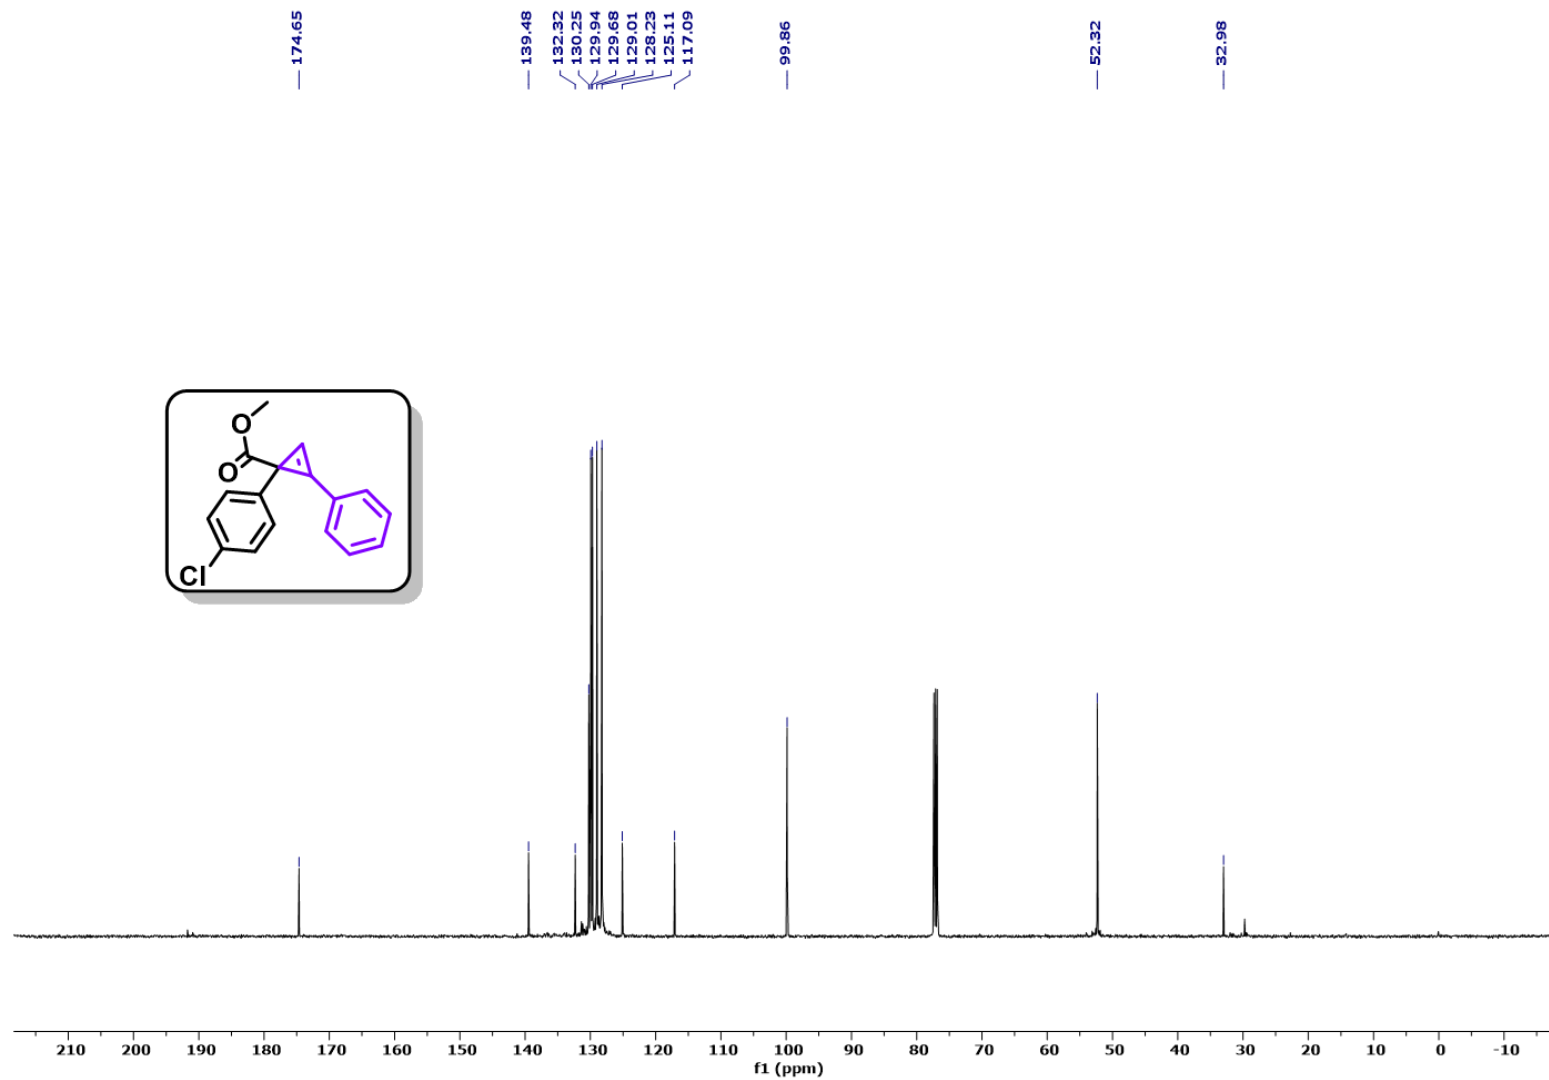

**Fig. S192.** <sup>13</sup>C NMR (126 MHz, CDCl<sub>3</sub>) spectra of methyl 1-(4-chlorophenyl)-2-phenylcycloprop-2-ene-1-carboxylate (**12a**).

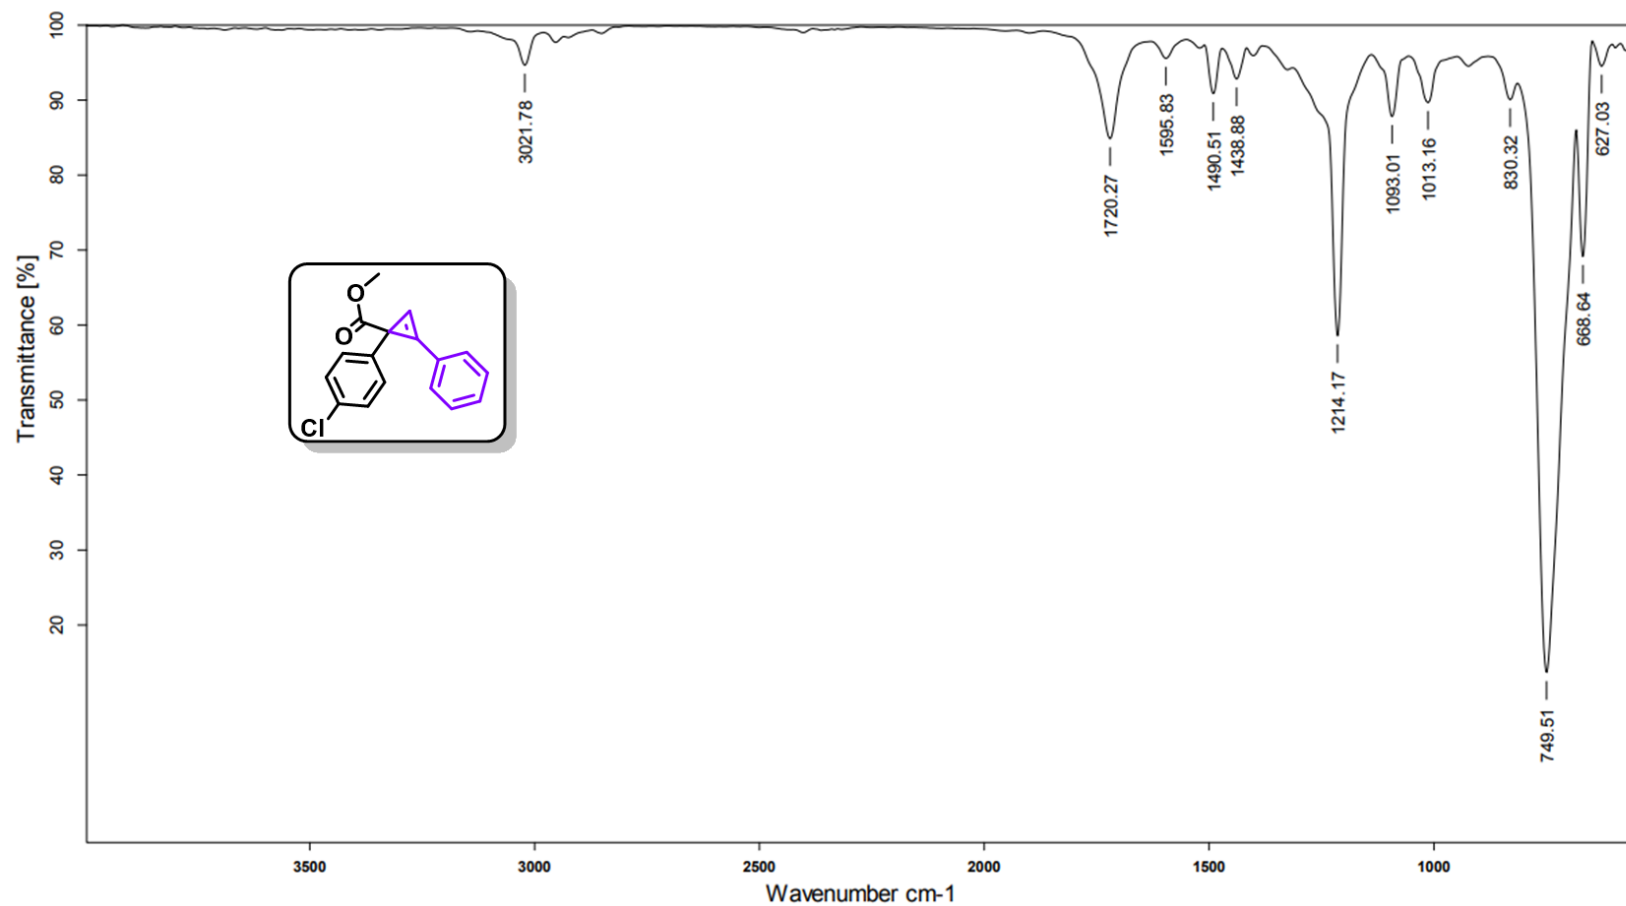

**Fig. S193.** IR spectra of spectra of methyl 1-(4-chlorophenyl)-2-phenylcycloprop-2-ene-1-carboxylate (**12a**).

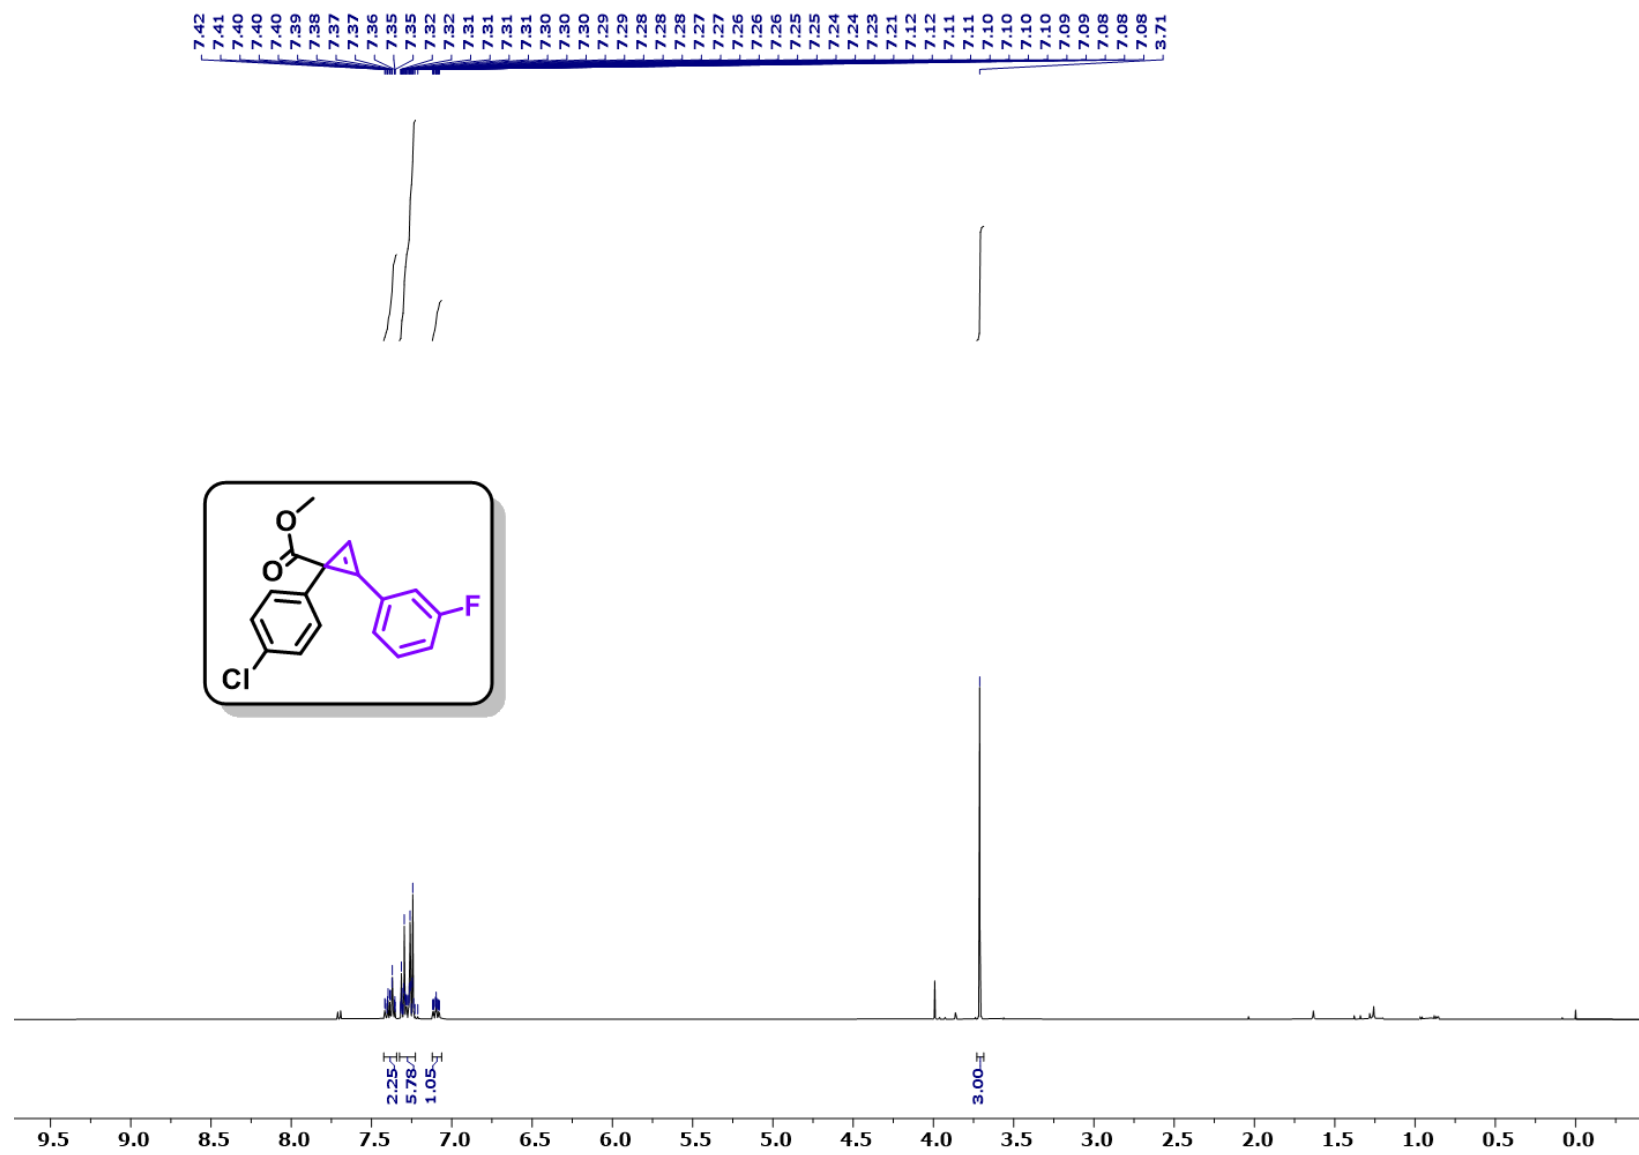

**Fig. S194.** <sup>1</sup>H NMR (500 MHz, CDCl<sub>3</sub>) spectra of methyl 1-(4-chlorophenyl)-2-(3-fluorophenyl)cycloprop-2-ene-1-carboxylate (**12b**).

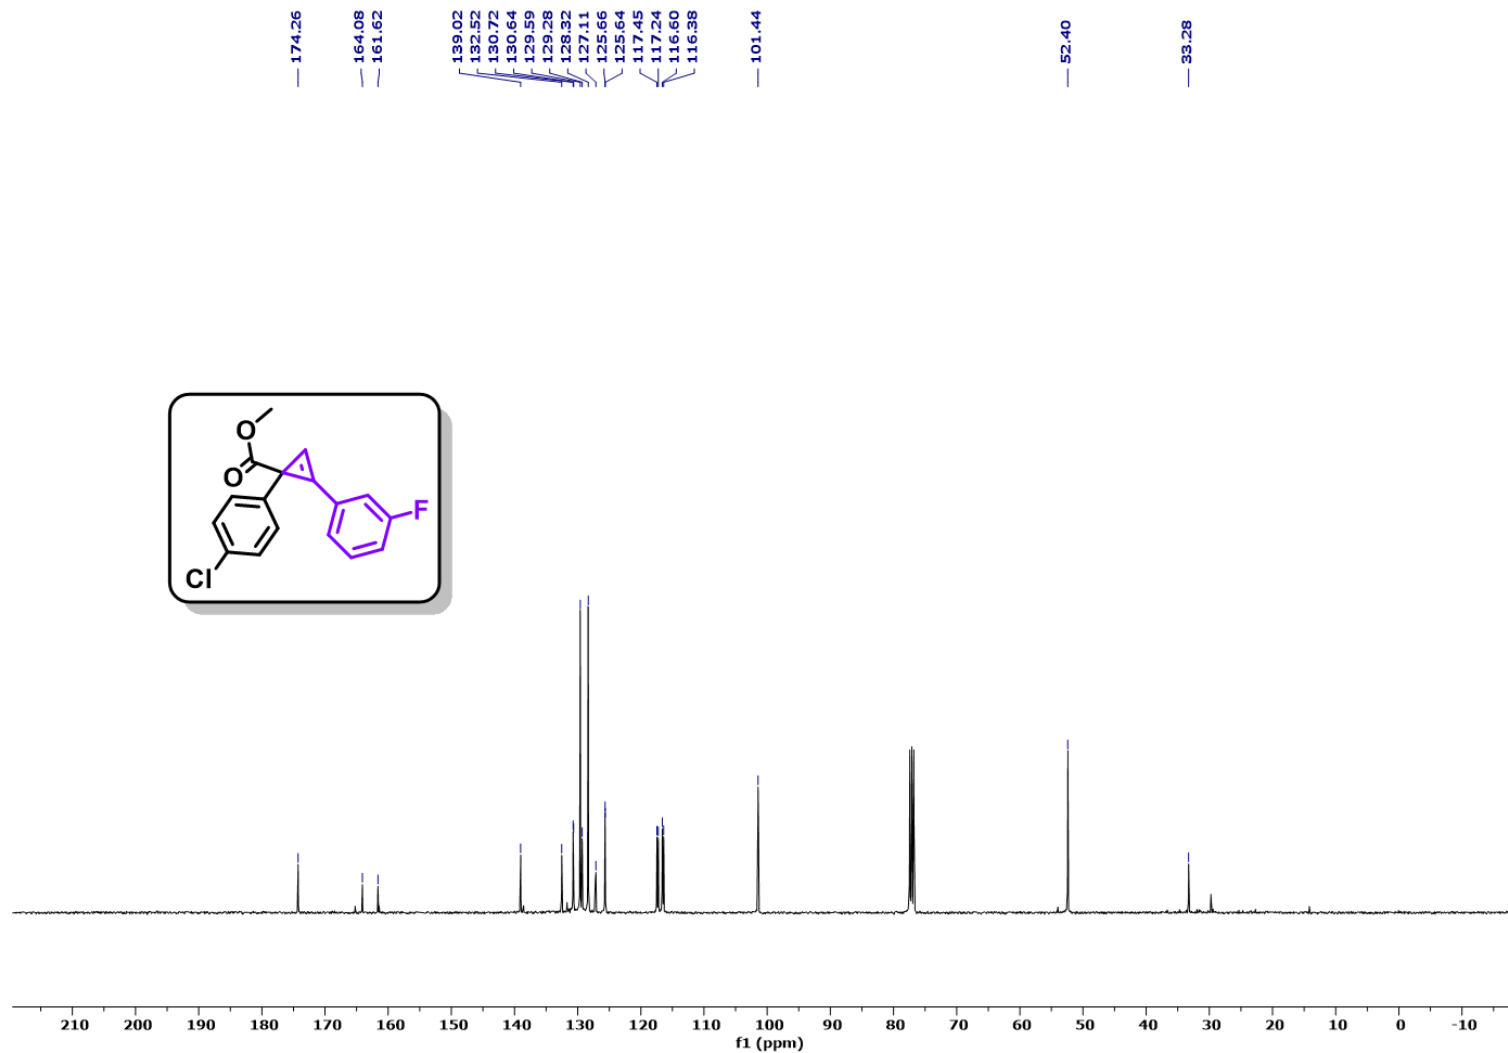

**Fig. S195.** <sup>13</sup>C NMR (101 MHz, CDCl<sub>3</sub>) spectra of methyl 1-(4-chlorophenyl)-2-(3-fluorophenyl)cycloprop-2-ene-1-carboxylate (**12b**).

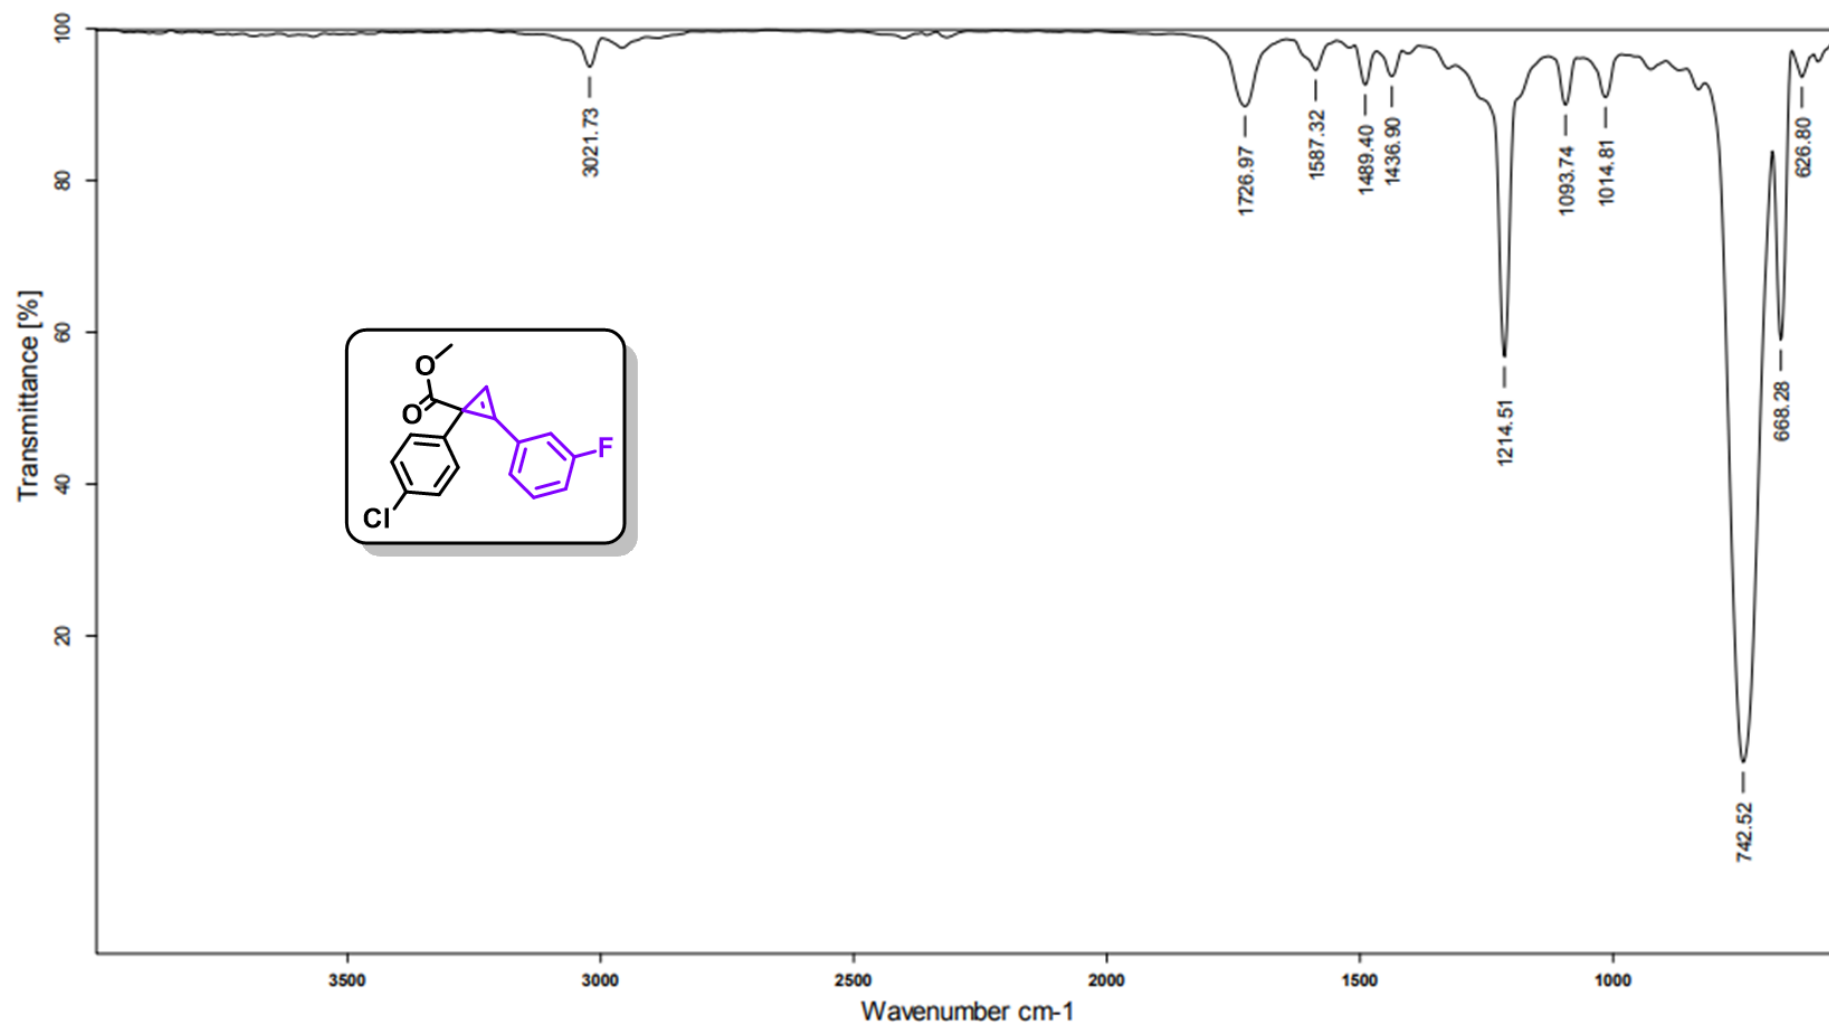

**Fig. S196.** IR spectra of spectra of methyl 1-(4-chlorophenyl)-2-(3-fluorophenyl)cycloprop-2-ene-1-carboxylate (**12b**).

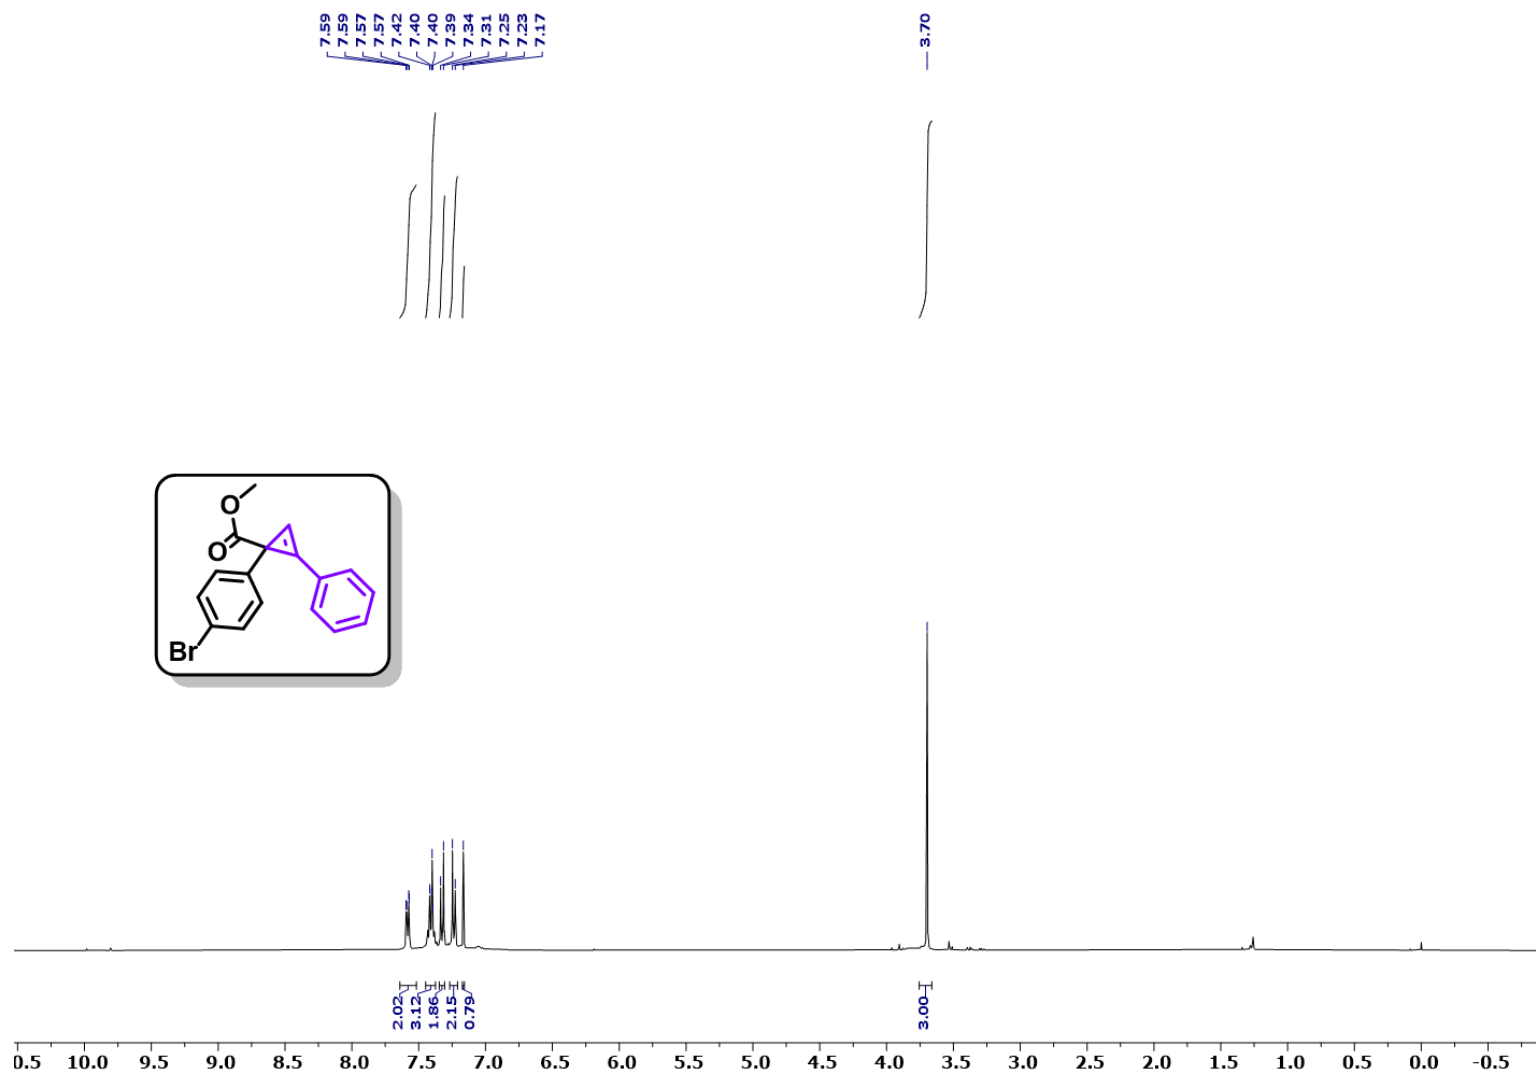

**Fig. S197.** <sup>1</sup>H NMR (400 MHz, CDCl<sub>3</sub>) spectra of methyl 1-(4-bromophenyl)-2-phenylcycloprop-2-ene-1-carboxylate (**12c**).

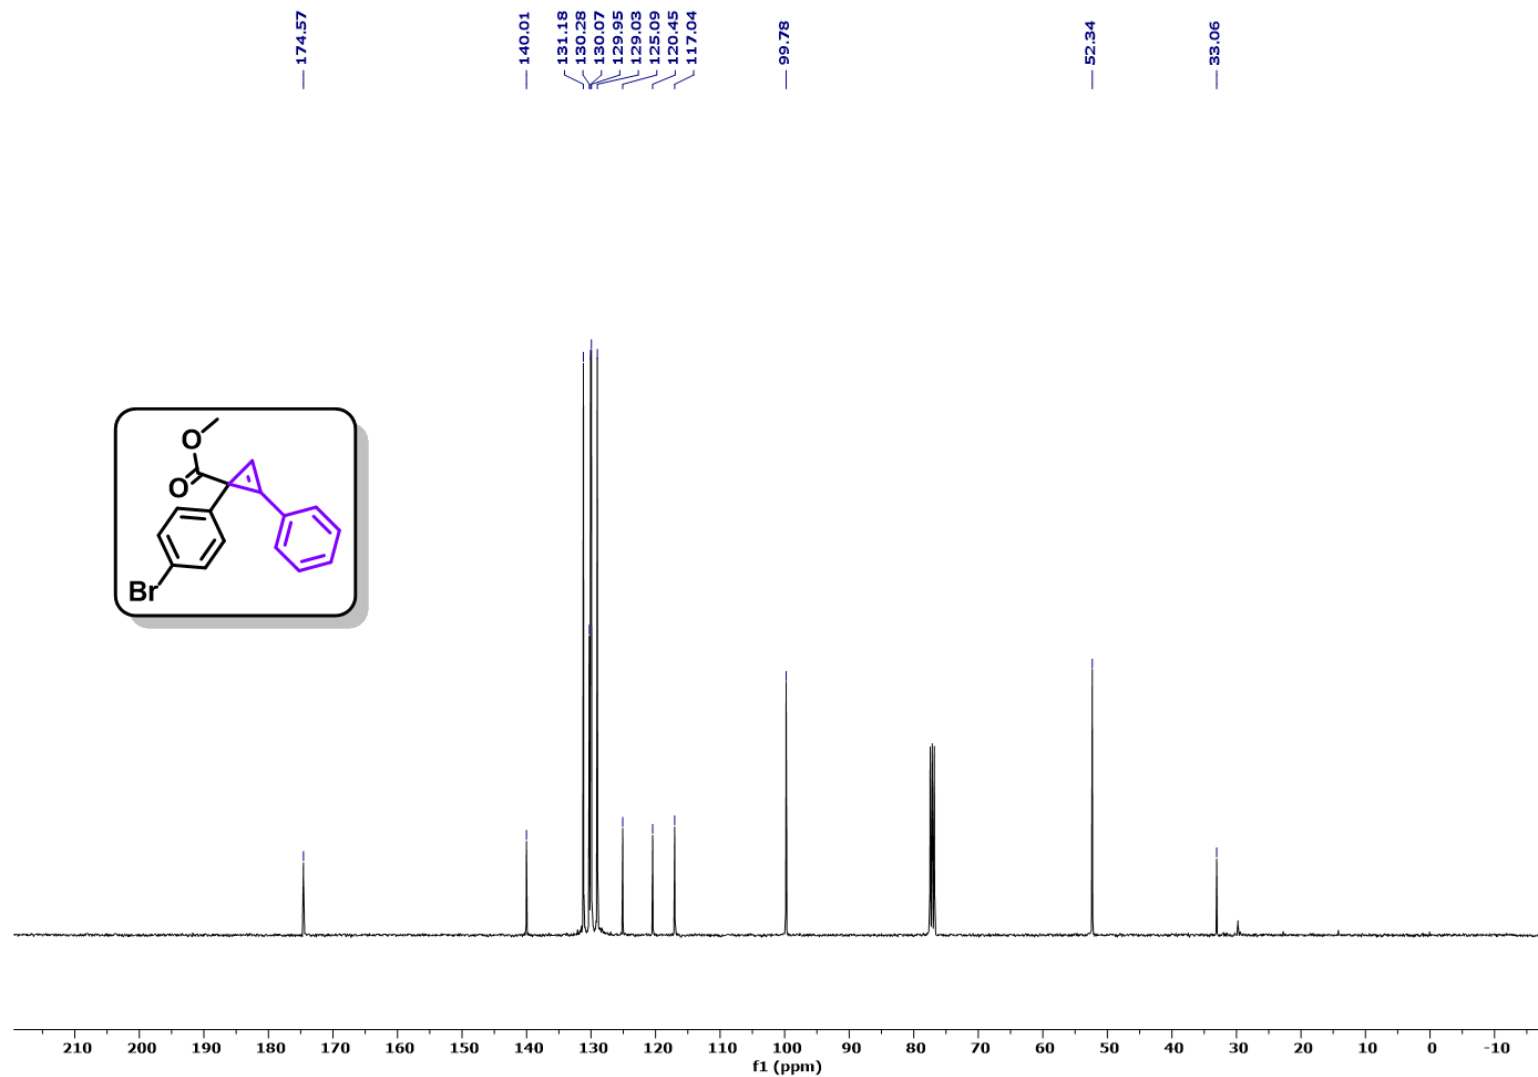

**Fig. S198.**  $^{13}\text{C}$  NMR (101 MHz,  $\text{CDCl}_3$ ) spectra of methyl 1-(4-bromophenyl)-2-phenylcycloprop-2-ene-1-carboxylate (**12c**).

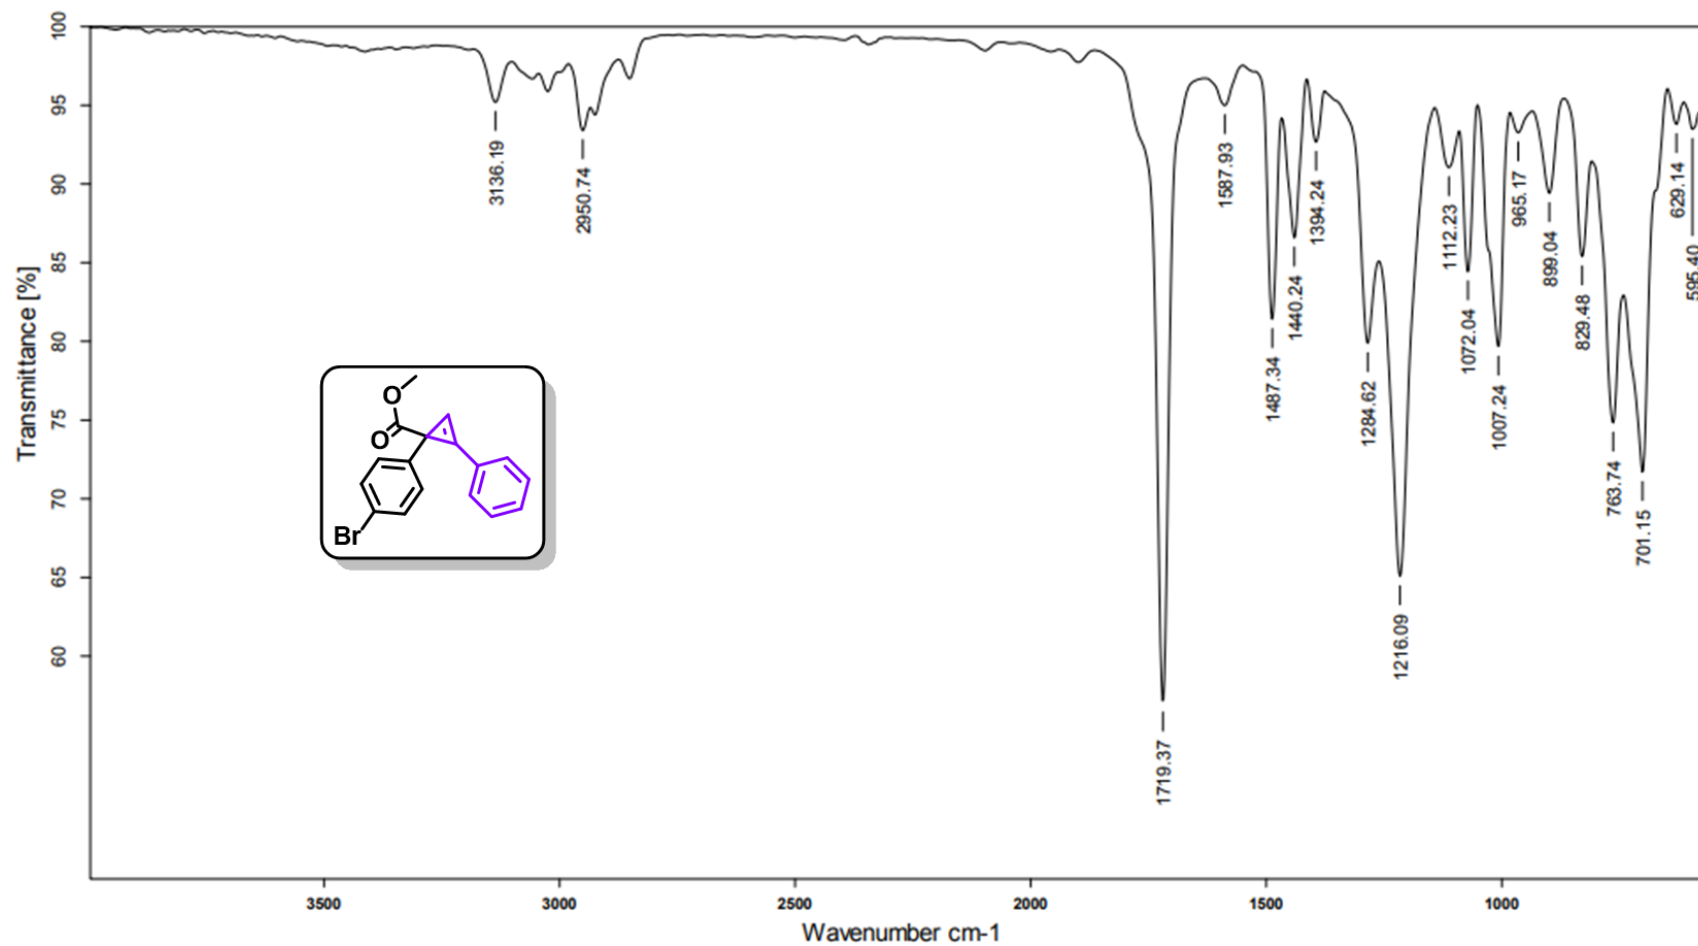

**Fig. S199.** IR spectra of spectra of methyl 1-(4-bromophenyl)-2-phenylcycloprop-2-ene-1-carboxylate (**12c**).



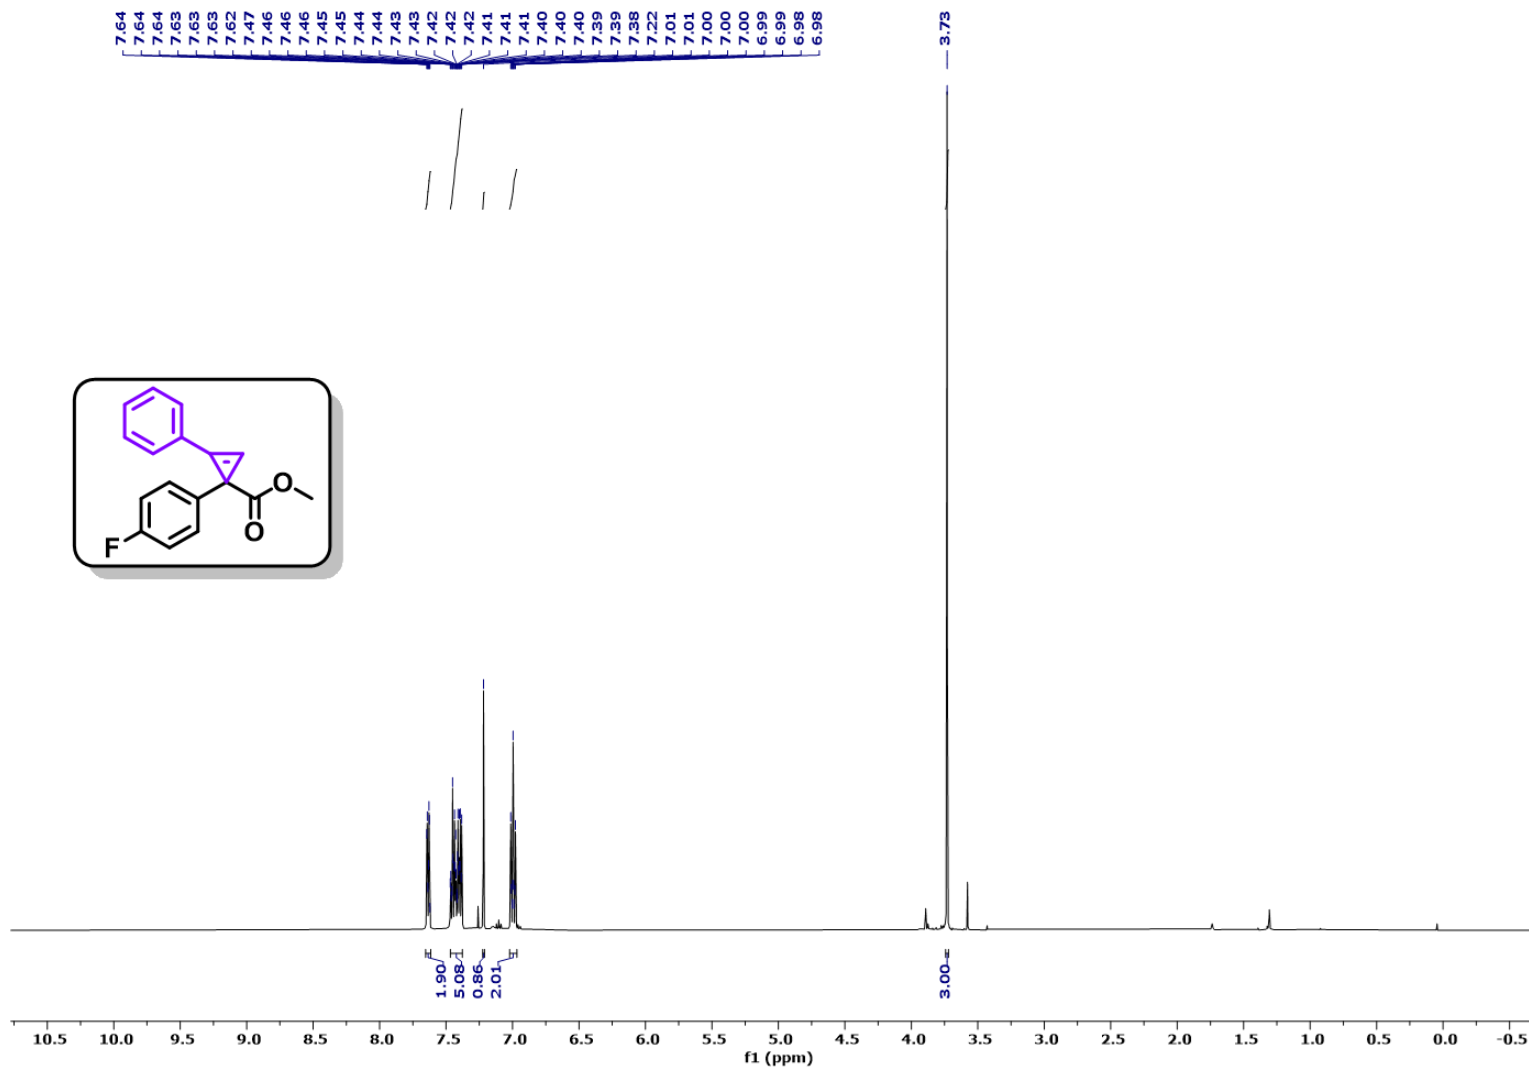

**Fig. S200.** <sup>1</sup>H NMR (500 MHz, CDCl<sub>3</sub>) spectra of methyl 1-(4-fluorophenyl)-2-phenylcycloprop-2-ene-1-carboxylate (**12d**).

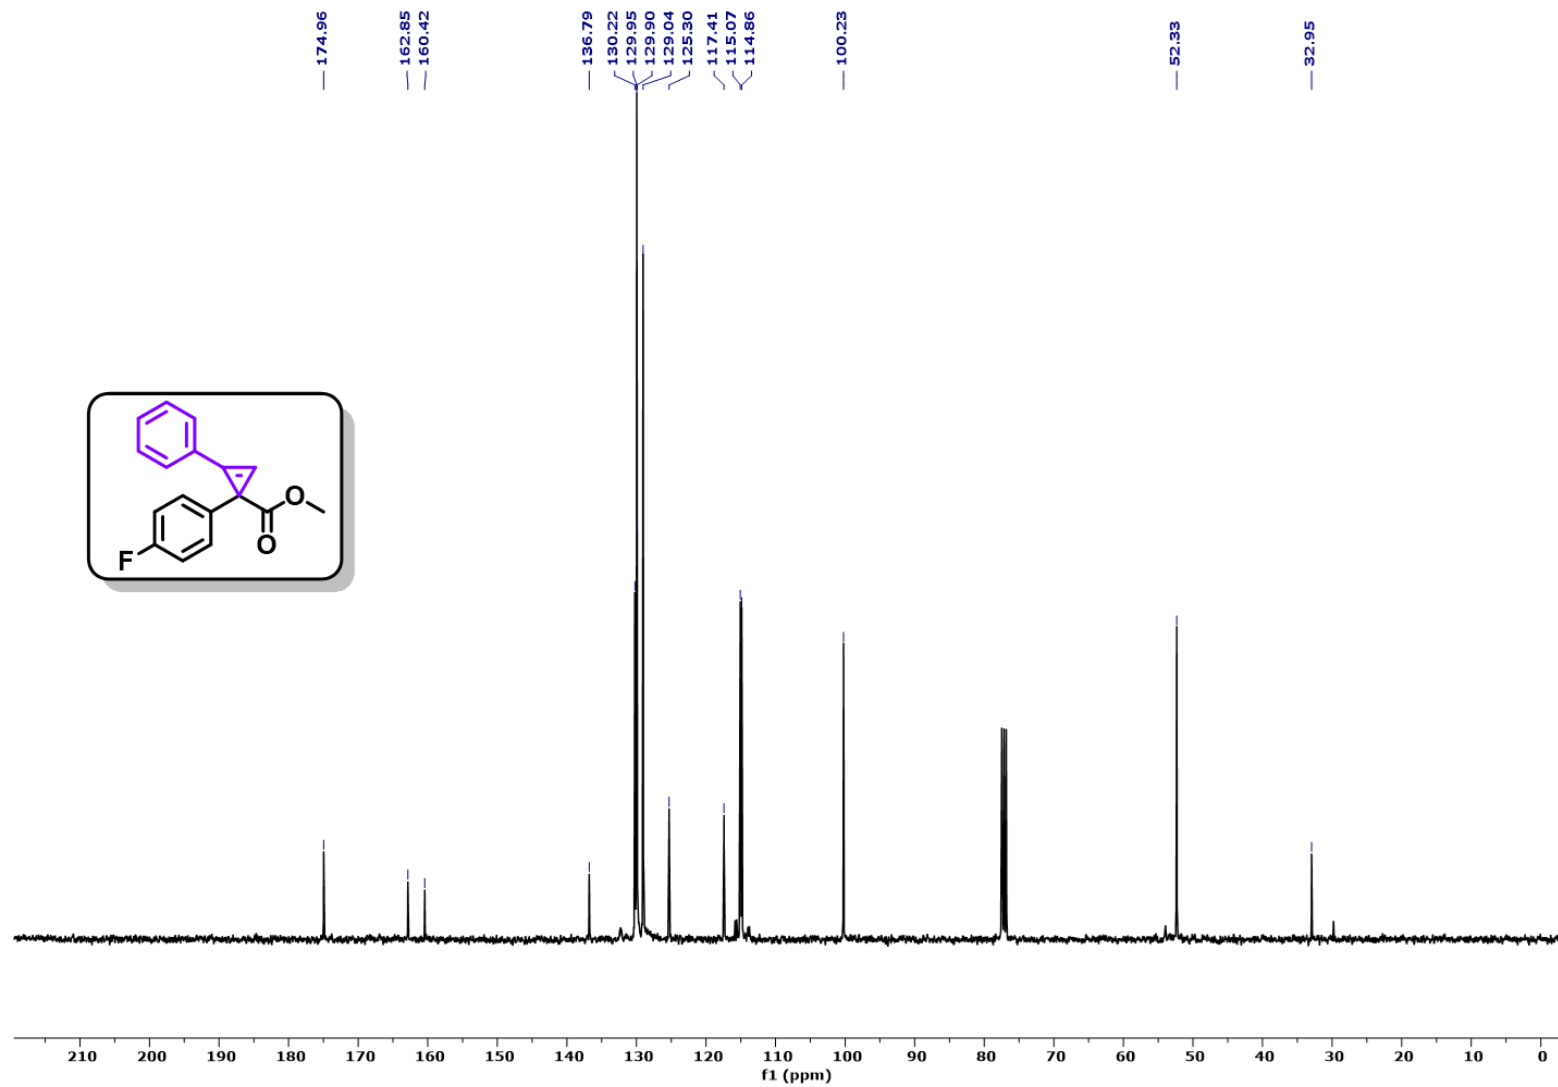

**Fig. S201.** <sup>13</sup>C NMR (101 MHz, CDCl<sub>3</sub>) spectra of methyl 1-(4-fluorophenyl)-2-phenylcycloprop-2-ene-1-carboxylate (**12d**).

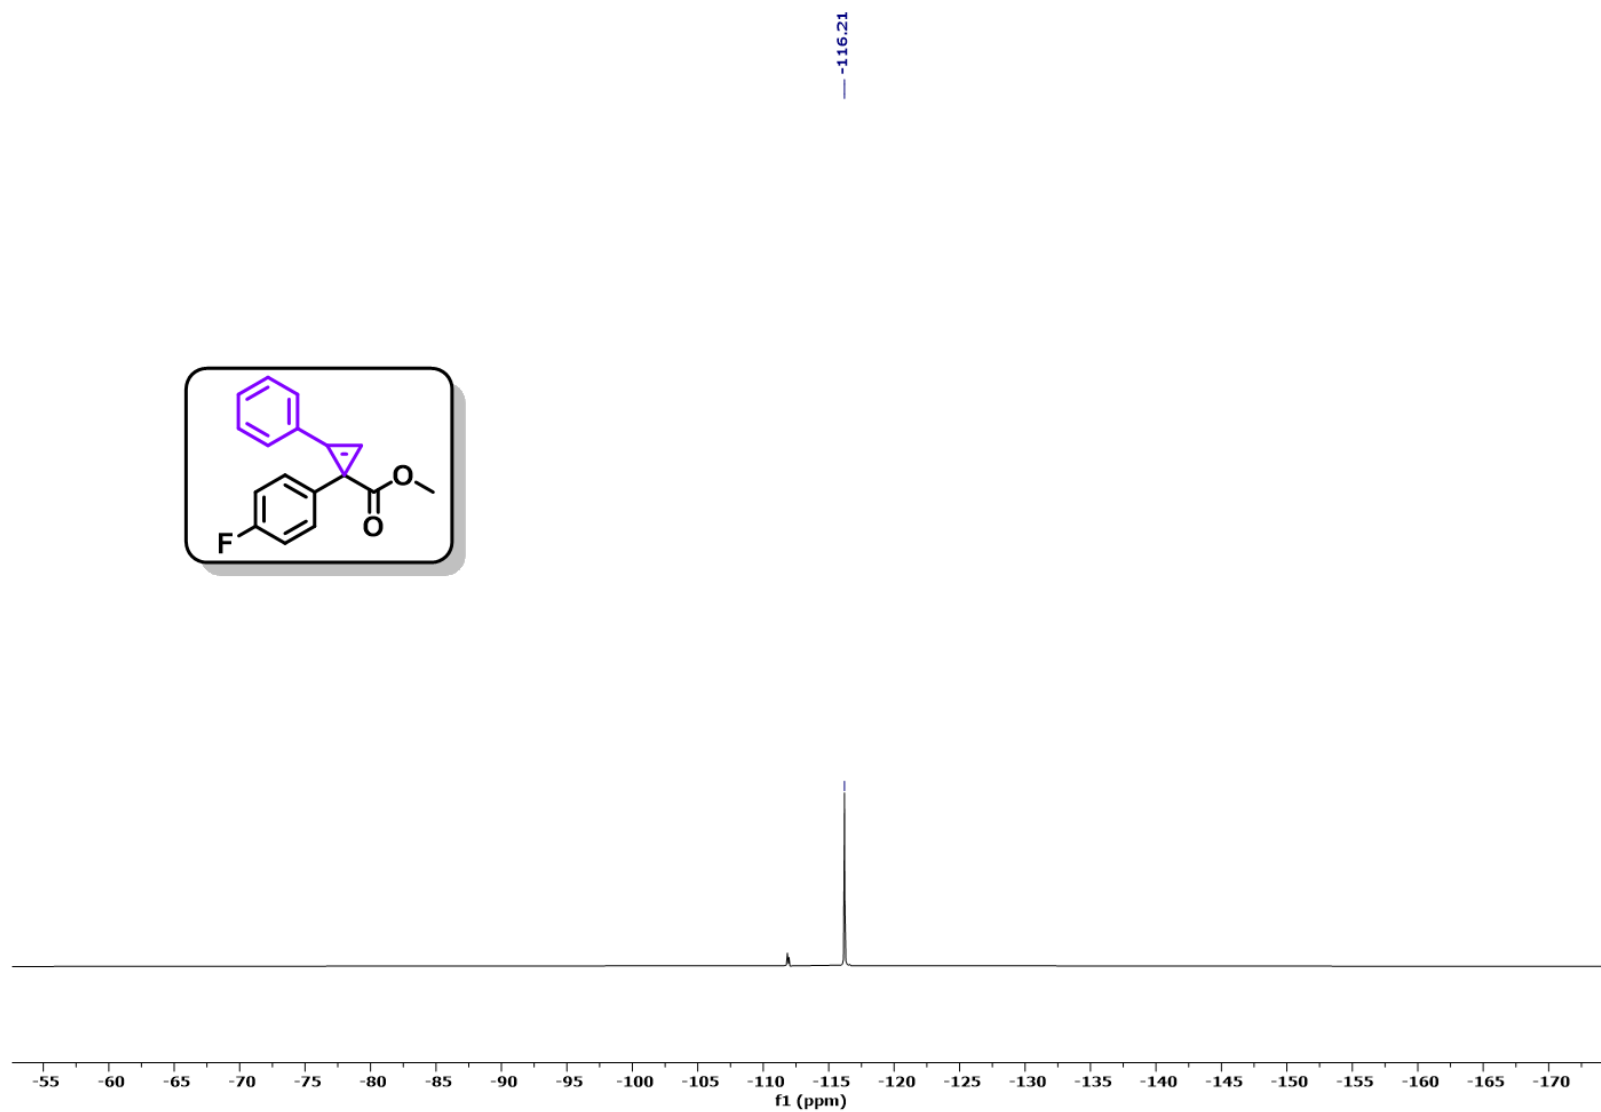

**Fig. S202.**  $^{19}\text{F}$  NMR (377 MHz,  $\text{CDCl}_3$ ) spectra of methyl 1-(4-fluorophenyl)-2-phenylcycloprop-2-ene-1-carboxylate (**3c**).

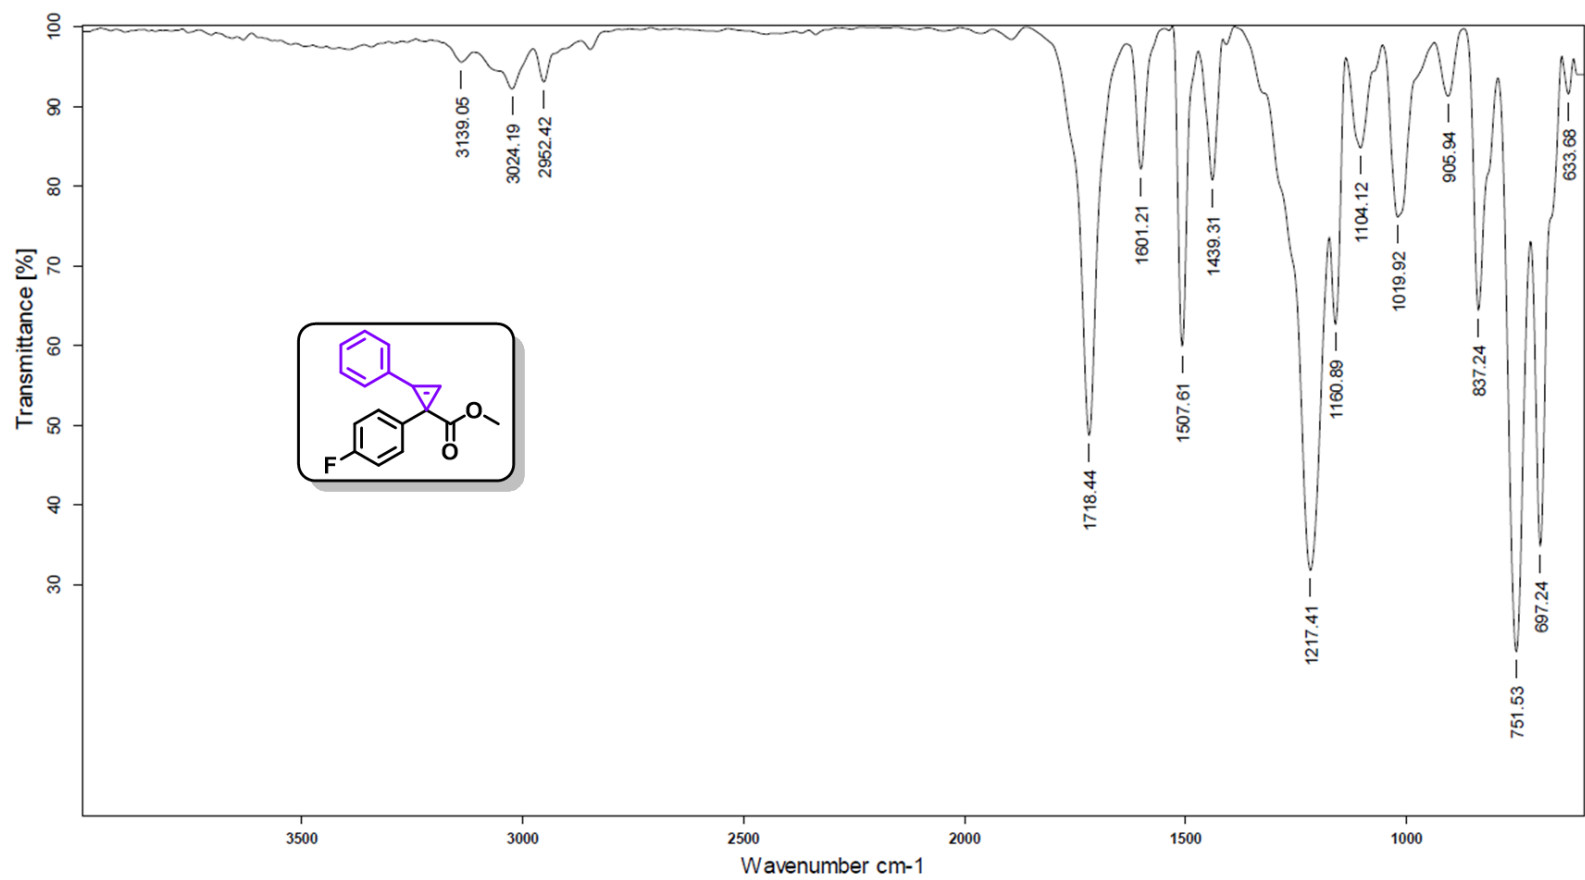

**Fig. S203.** IR spectra of spectra of methyl 1-(4-fluorophenyl)-2-phenylcycloprop-2-ene-1-carboxylate (**3c**).

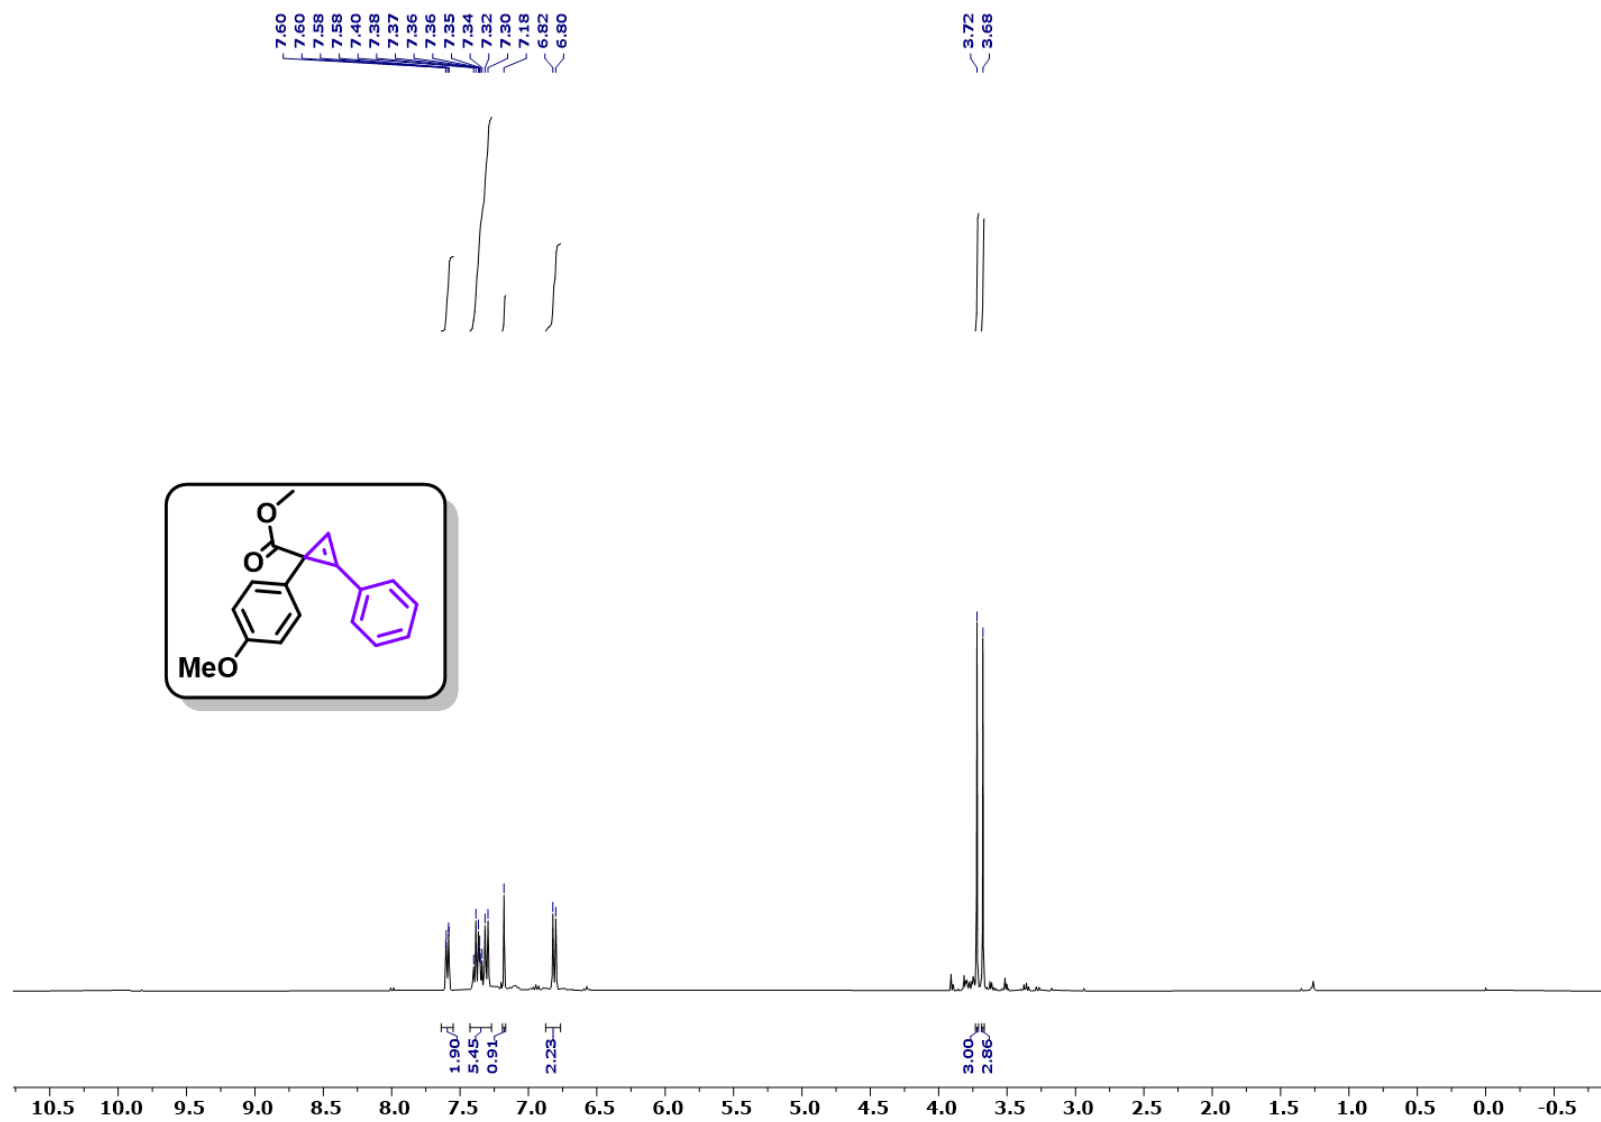

**Fig. S204.** <sup>1</sup>H NMR (400 MHz, CDCl<sub>3</sub>) spectra of methyl 1-(4-methoxyphenyl)-2-phenylcycloprop-2-ene-1-carboxylate (**12e**).

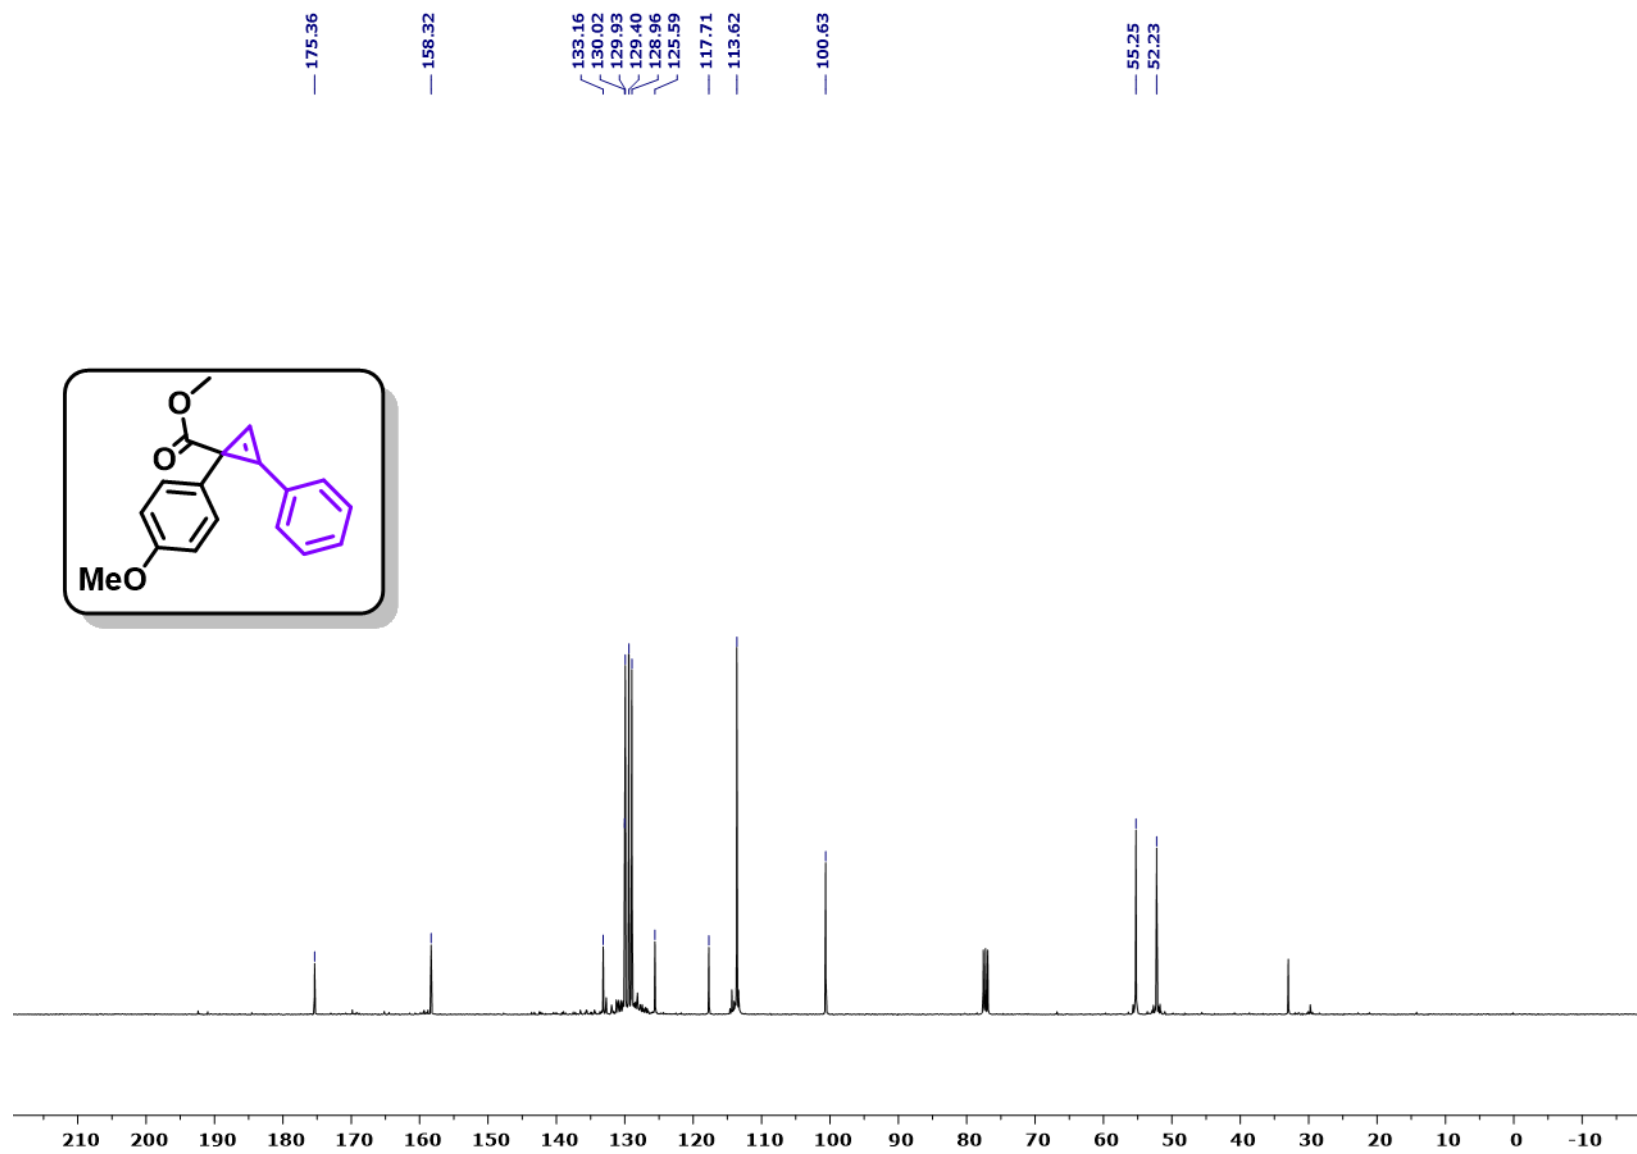

**Fig. S205.** <sup>13</sup>C NMR (101 MHz, CDCl<sub>3</sub>) spectra of methyl 2-(4-fluorophenyl)-1-(4-methoxyphenyl)cycloprop-2-ene-1-carboxylate (**12e**).

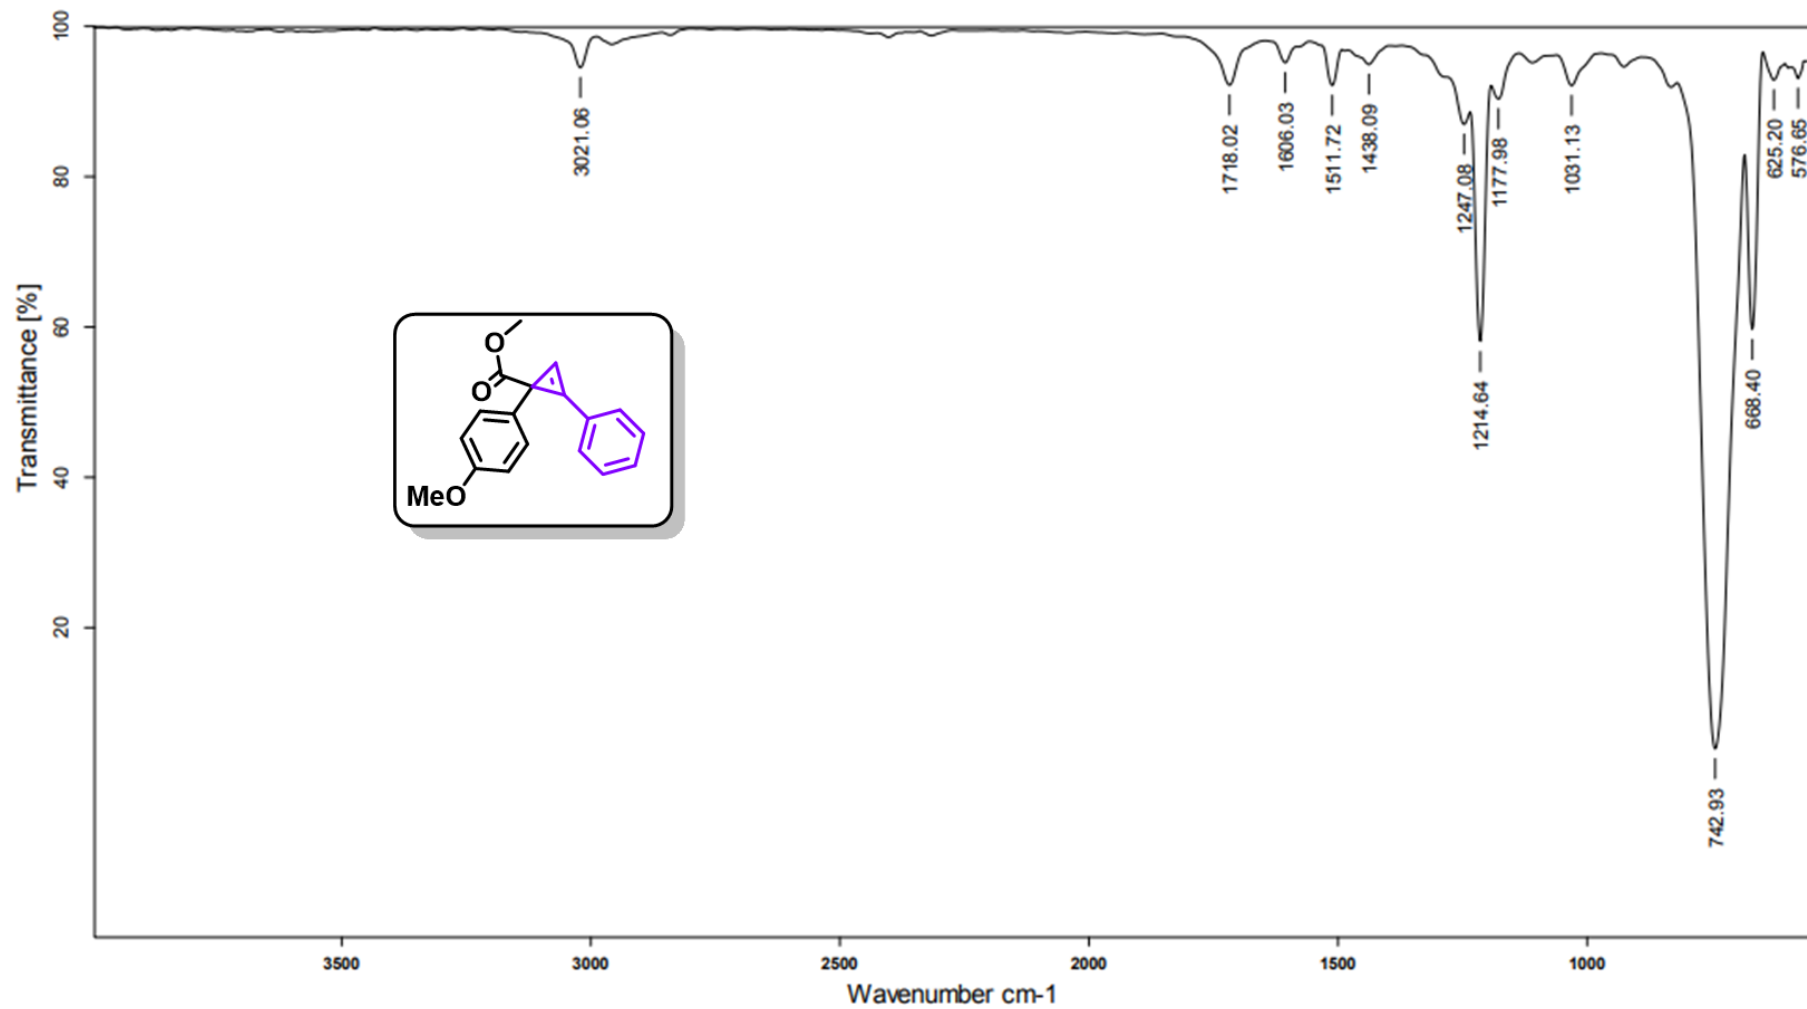

**Fig. S206.** IR spectra of spectra of methyl 2-(4-fluorophenyl)-1-(4-methoxyphenyl)cycloprop-2-ene-1-carboxylate (**12e**).

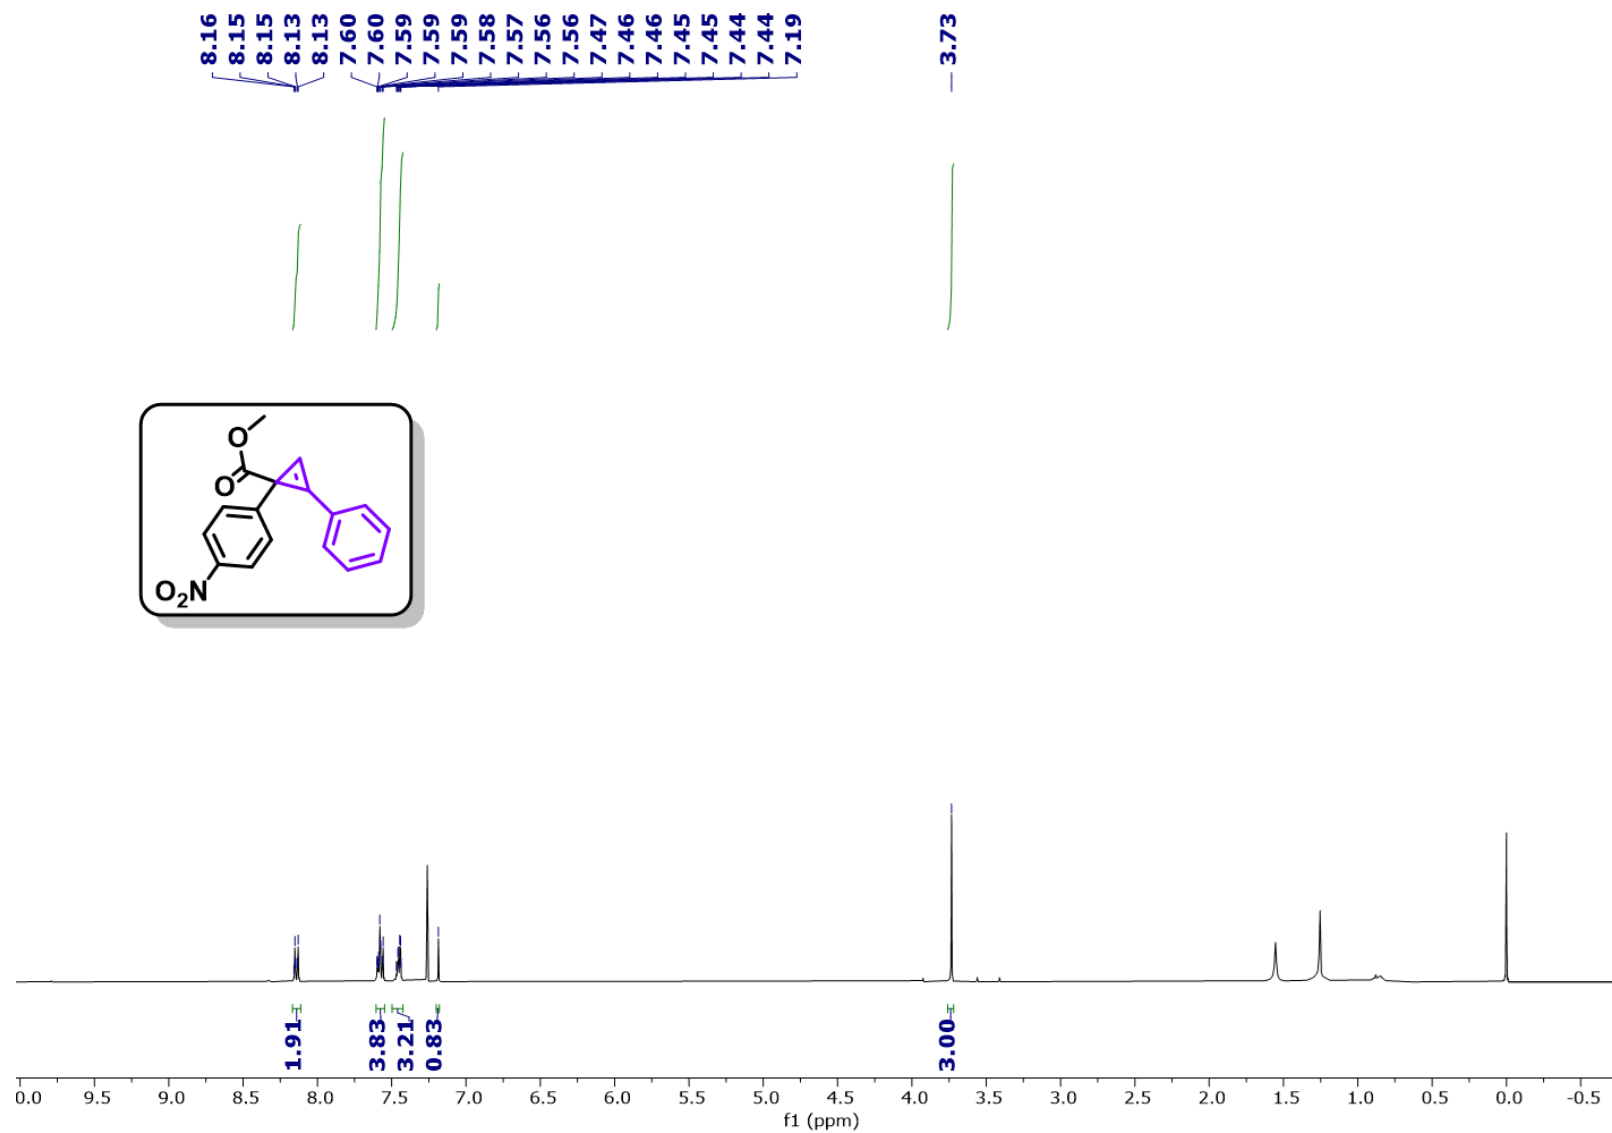

**Fig. S207.** <sup>1</sup>H NMR (400 MHz, CDCl<sub>3</sub>) spectra of methyl 1-(4-nitrophenyl)-2-phenylcycloprop-2-ene-1-carboxylate (**12f**).



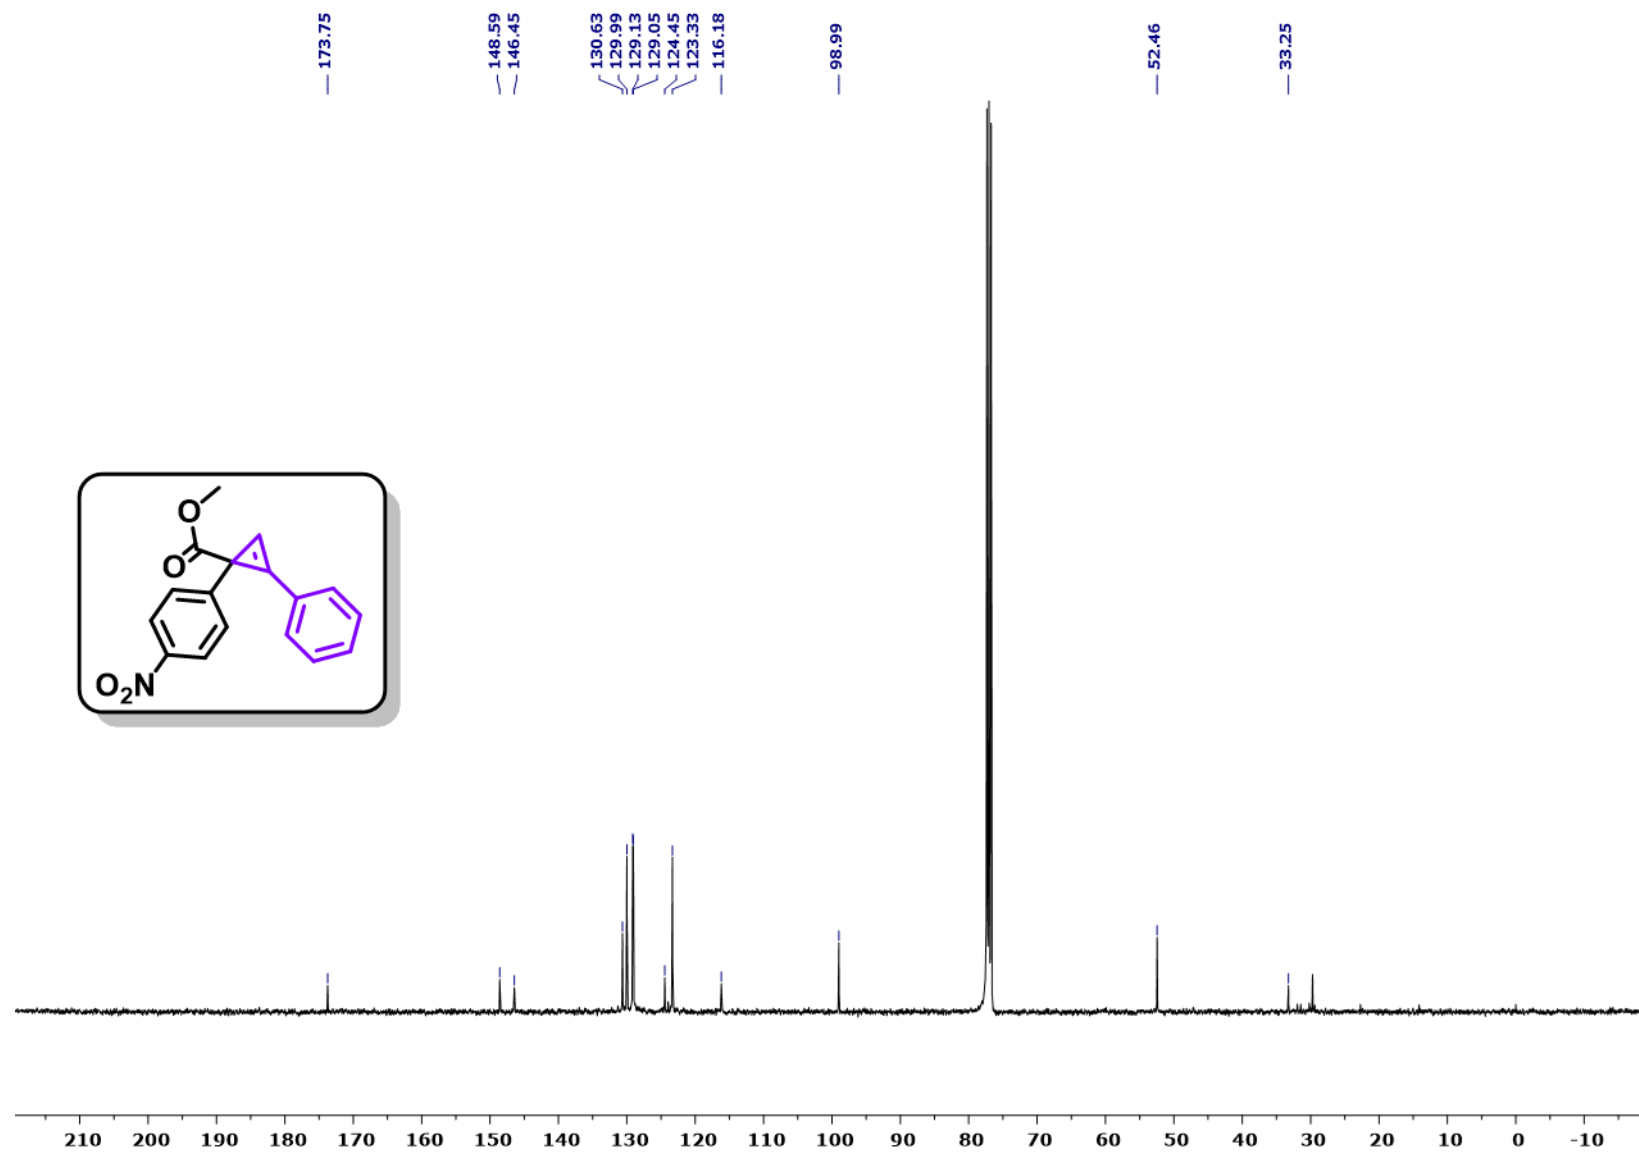

**Fig. S208.** <sup>13</sup>C NMR (101 MHz, CDCl<sub>3</sub>) spectra of methyl 1-(4-nitrophenyl)-2-phenylcycloprop-2-ene-1-carboxylate (**12f**).

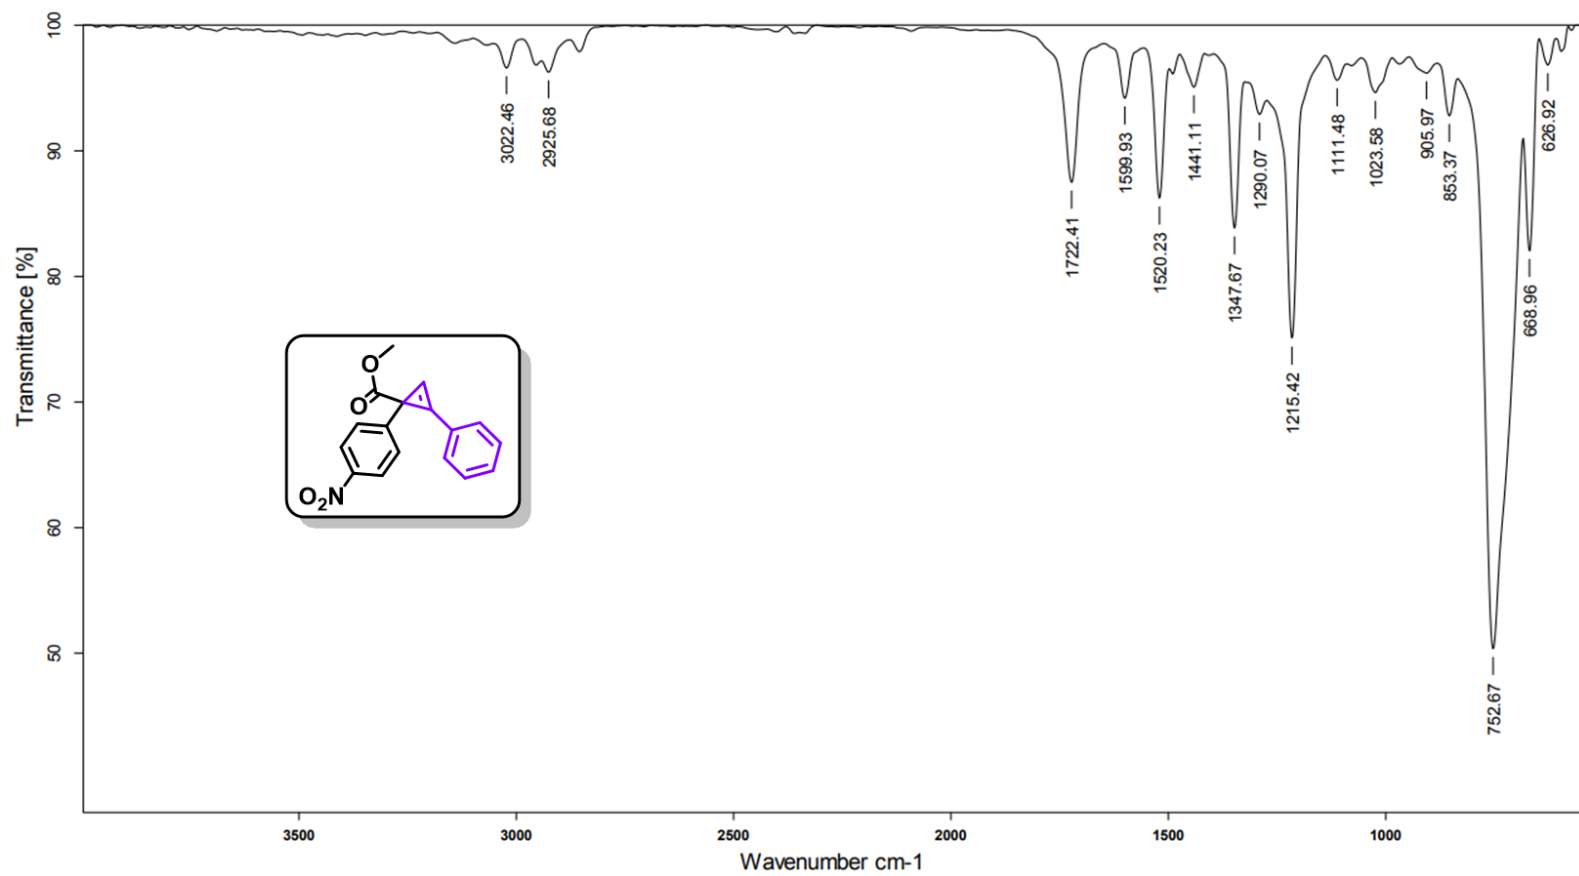

**Fig. S209.** IR spectra of spectra of methyl 1-(4-nitrophenyl)-2-phenylcycloprop-2-ene-1-carboxylate (**12f**).

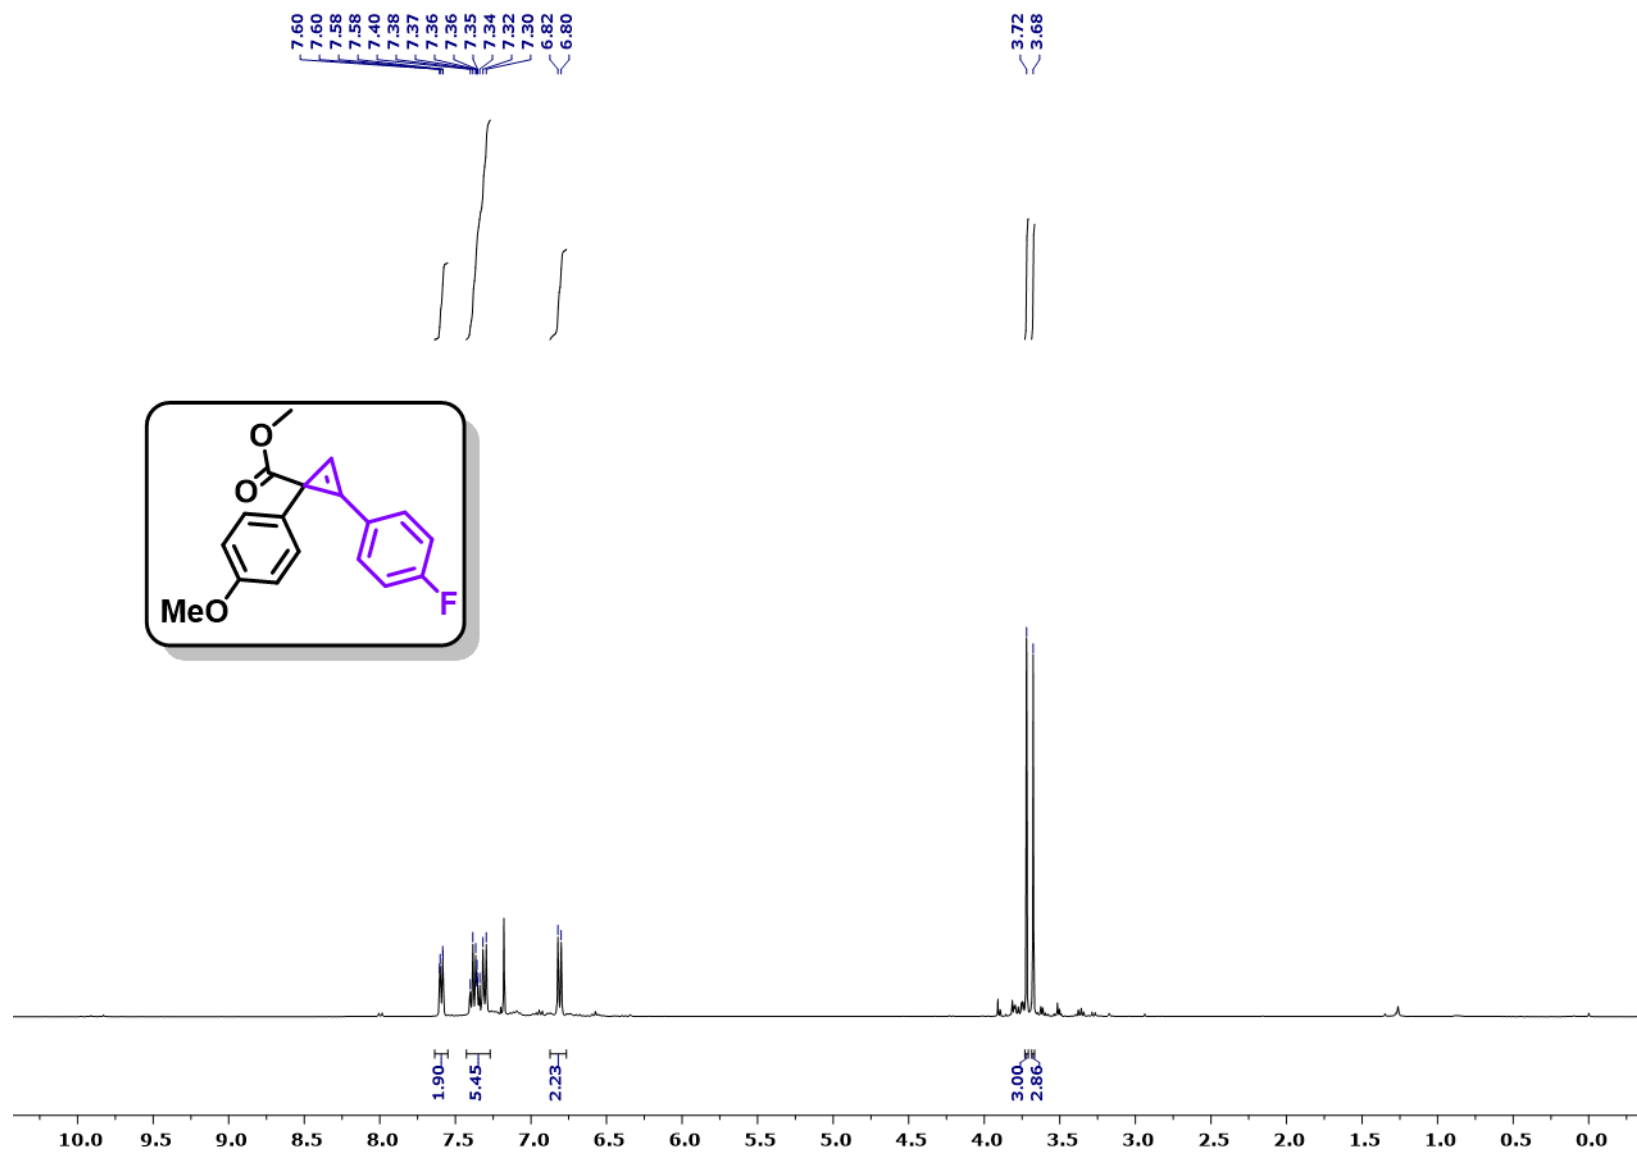

**Fig. S210.** <sup>1</sup>H NMR (400 MHz, CDCl<sub>3</sub>) spectra of methyl 2-(4-fluorophenyl)-1-(4-methoxyphenyl)cycloprop-2-ene-1-carboxylate (**12g**).

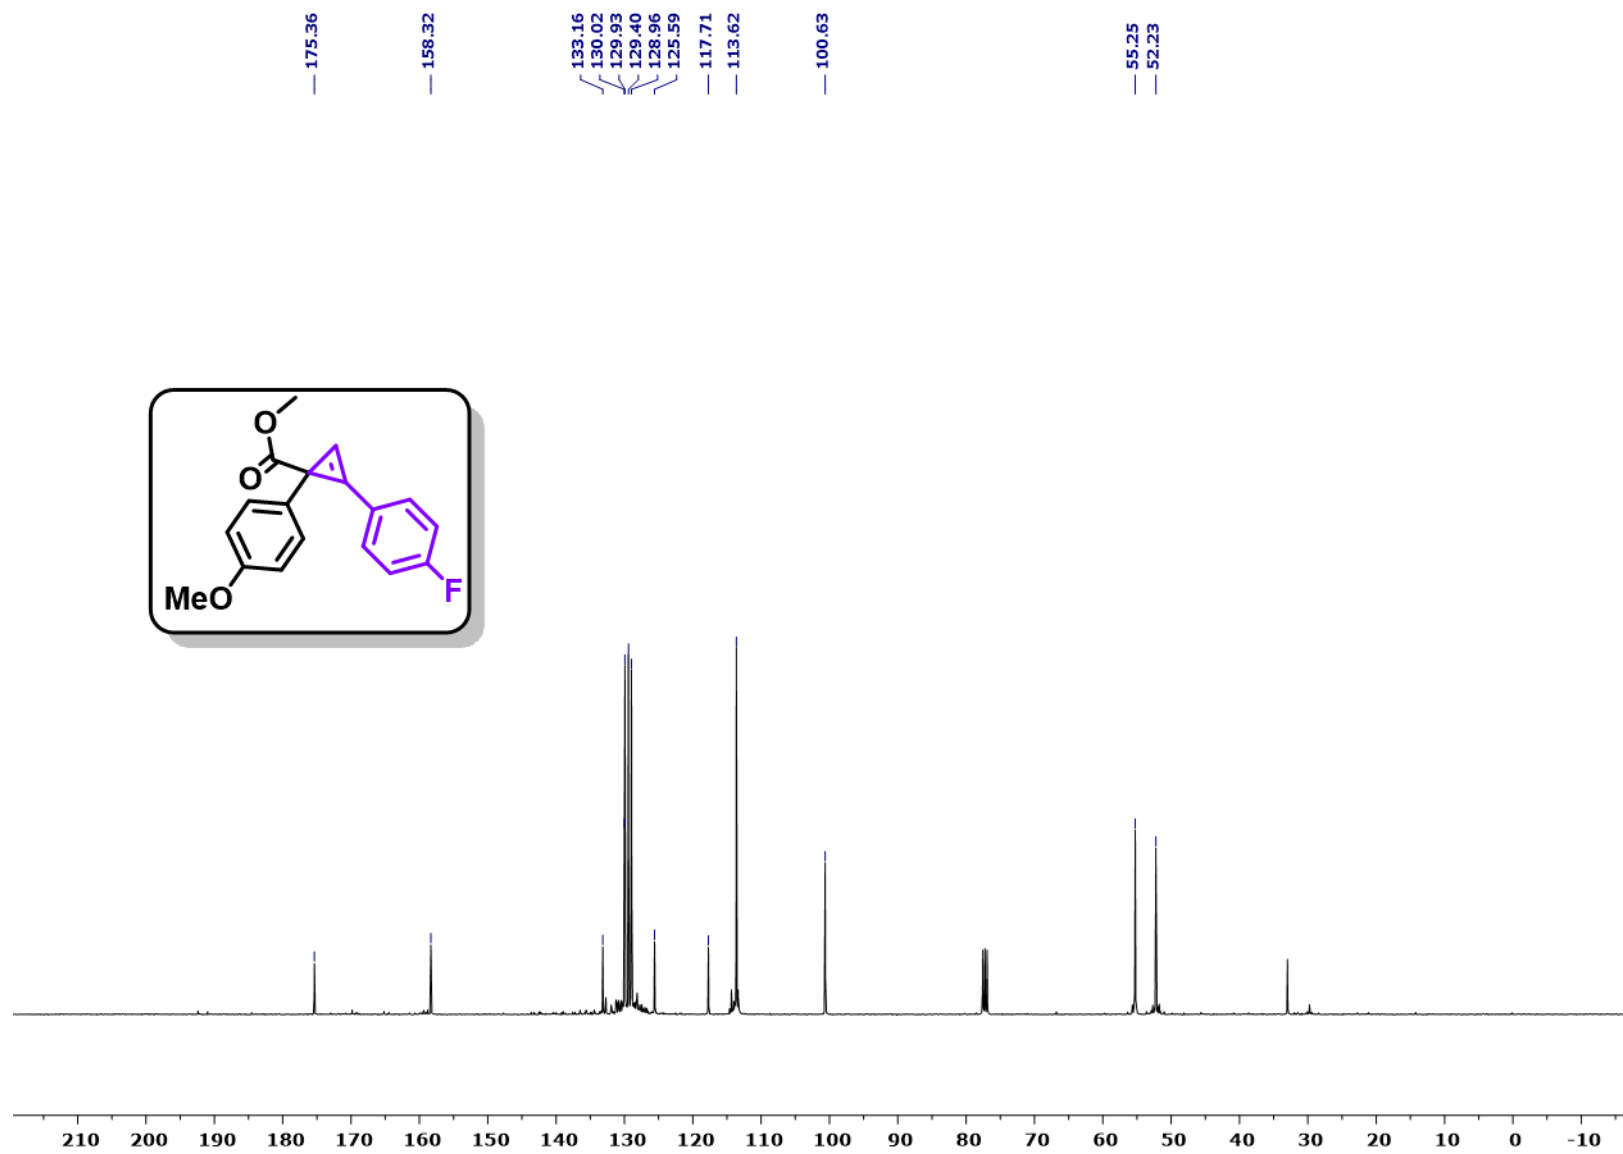

**Fig. S211.** <sup>13</sup>C NMR (101 MHz, CDCl<sub>3</sub>) spectra of methyl 2-(4-fluorophenyl)-1-(4-methoxyphenyl)cycloprop-2-ene-1-carboxylate (**12g**).

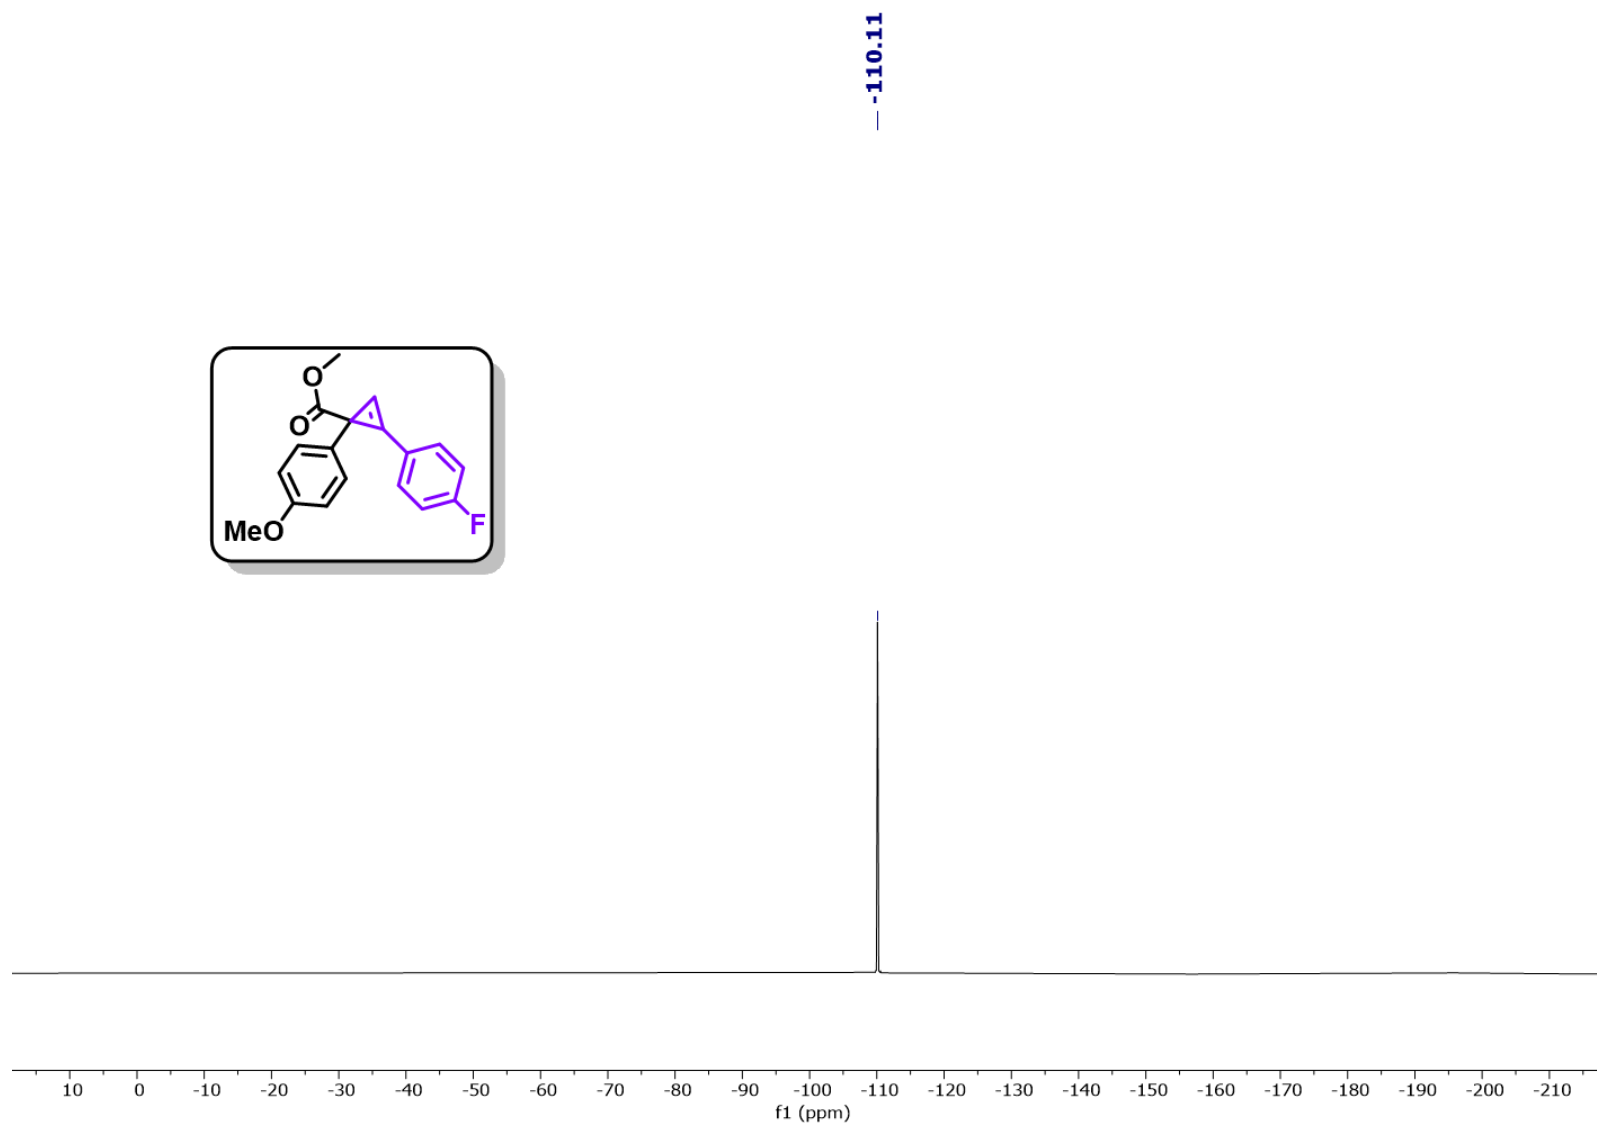

**Fig. S212.**  $^{19}\text{F}$  NMR (376 MHz,  $\text{CDCl}_3$ ) spectra of methyl 2-(4-fluorophenyl)-1-(4-methoxyphenyl)cycloprop-2-ene-1-carboxylate (**12g**).

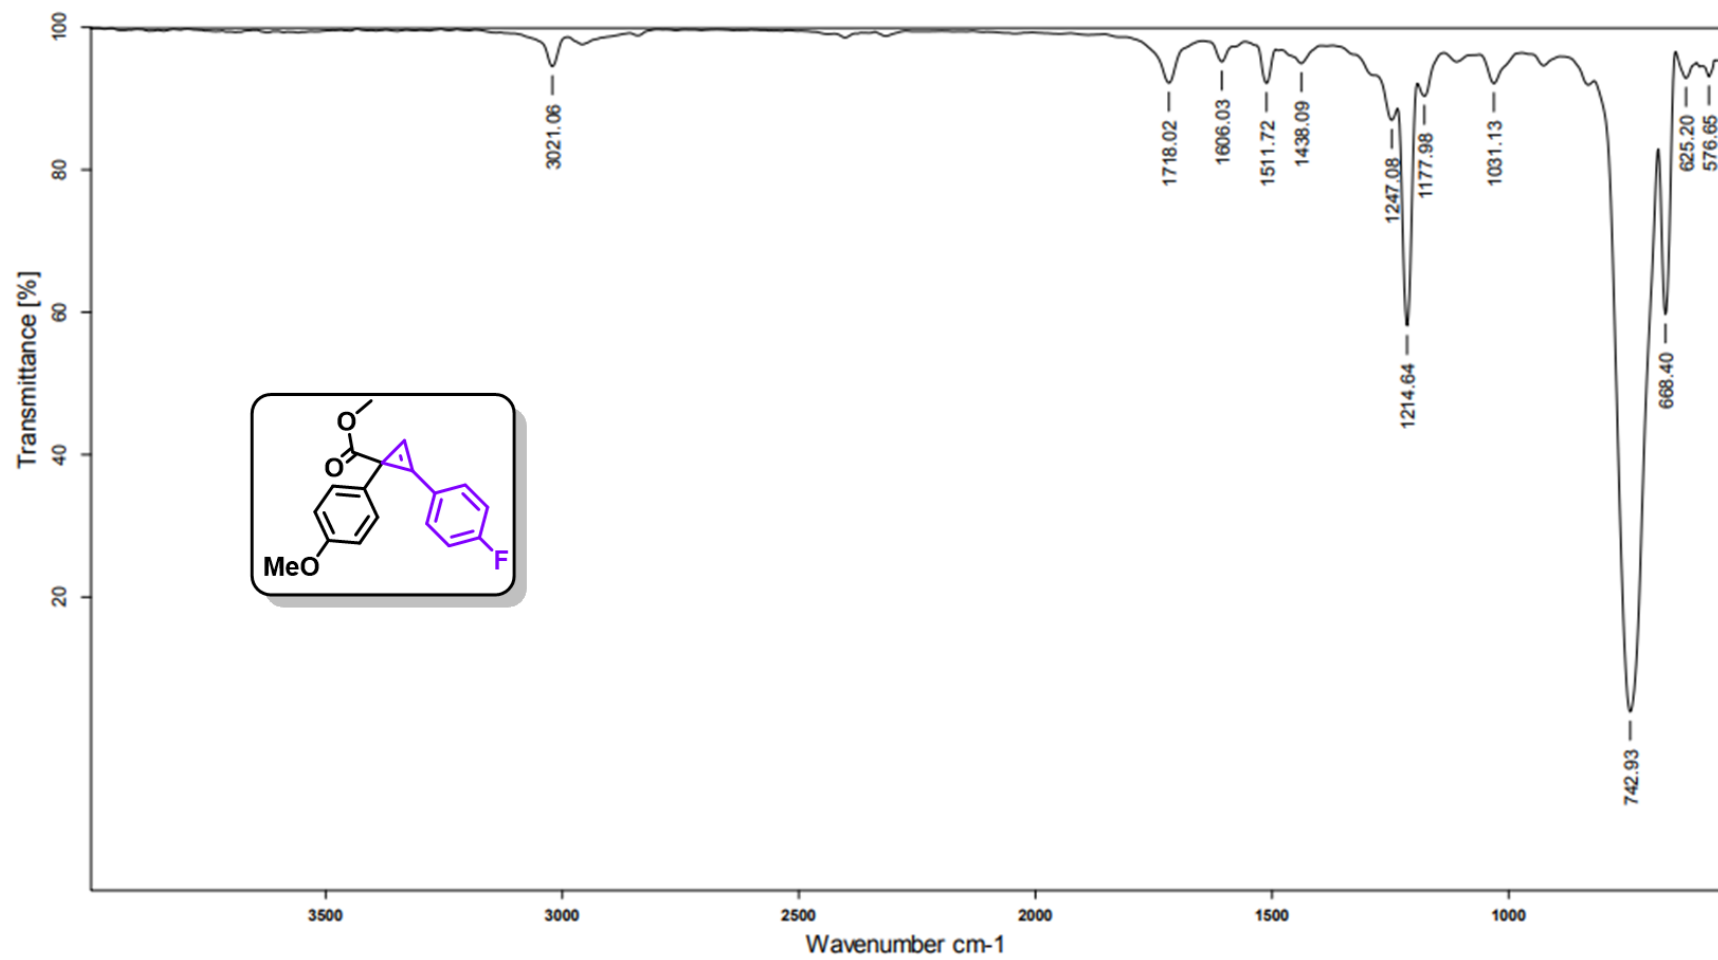

**Fig. S213.** IR spectra of spectra of methyl 2-(4-fluorophenyl)-1-(4-methoxyphenyl)cycloprop-2-ene-1-carboxylate (**12g**).

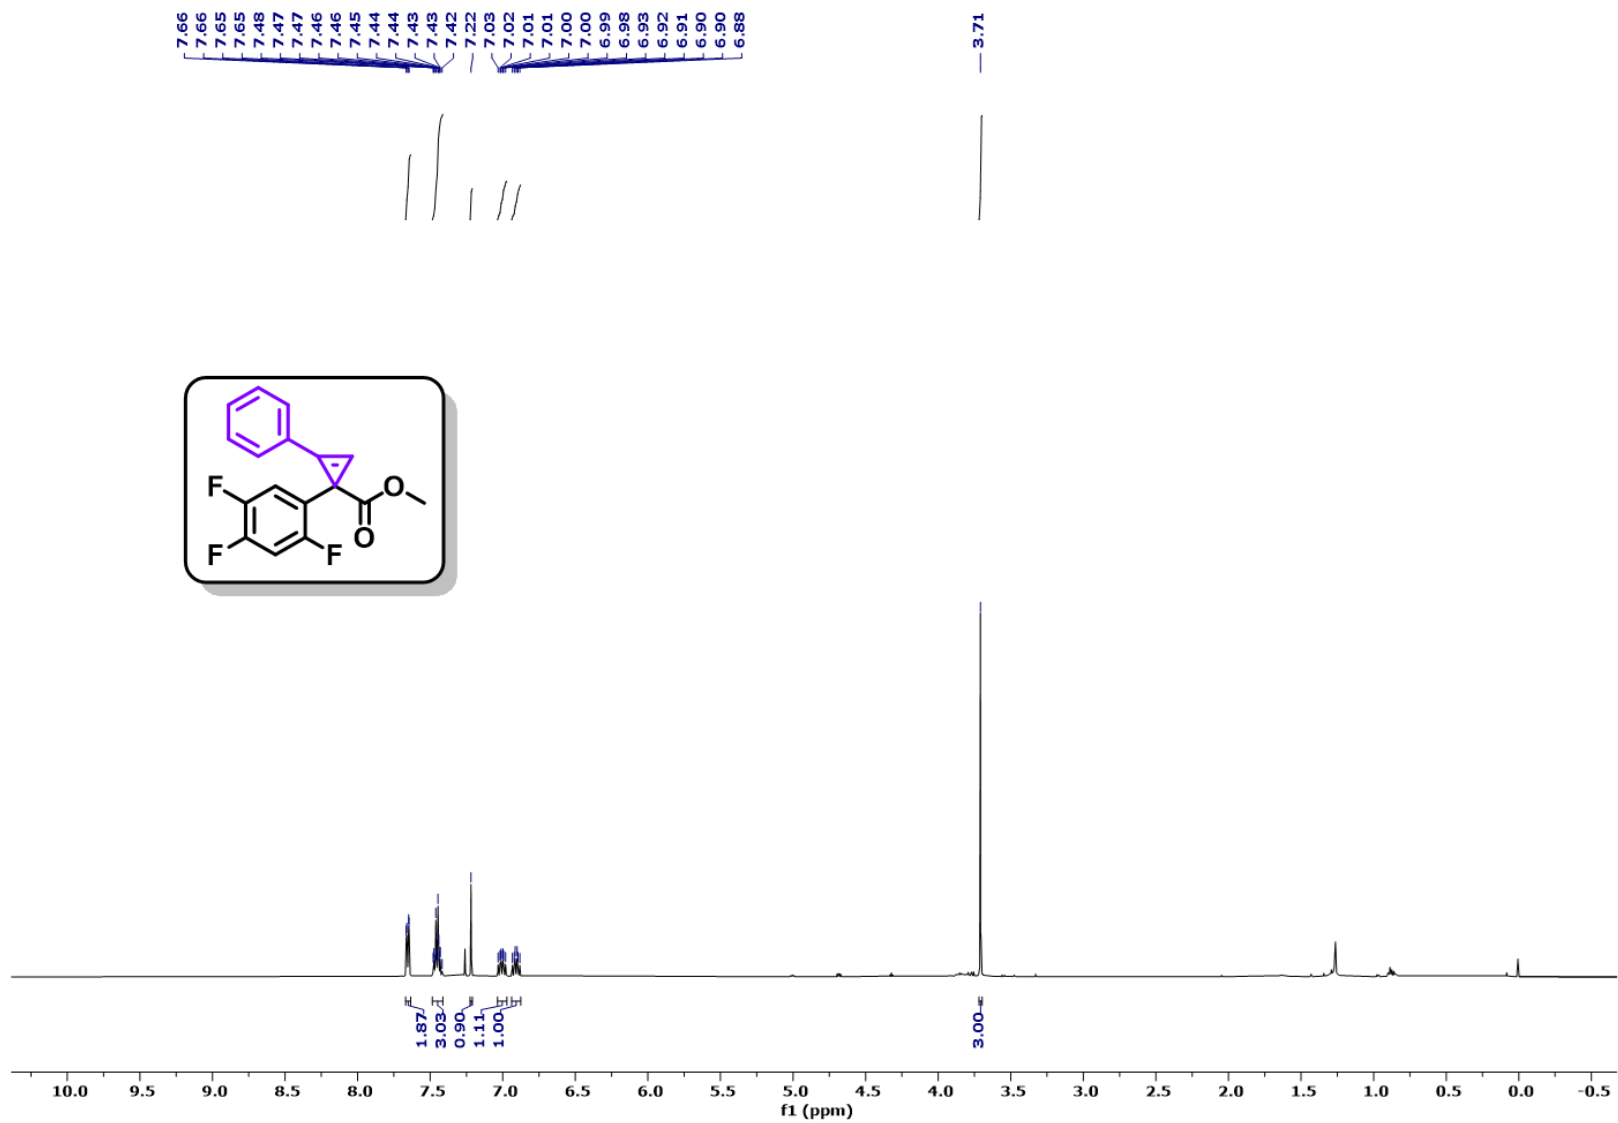

**Fig. S214.** <sup>1</sup>H NMR (500 MHz, CDCl<sub>3</sub>) spectra of methyl 2-phenyl-1-(2,4,5-trifluorophenyl)cycloprop-2-ene-1-carboxylate (**12h**).

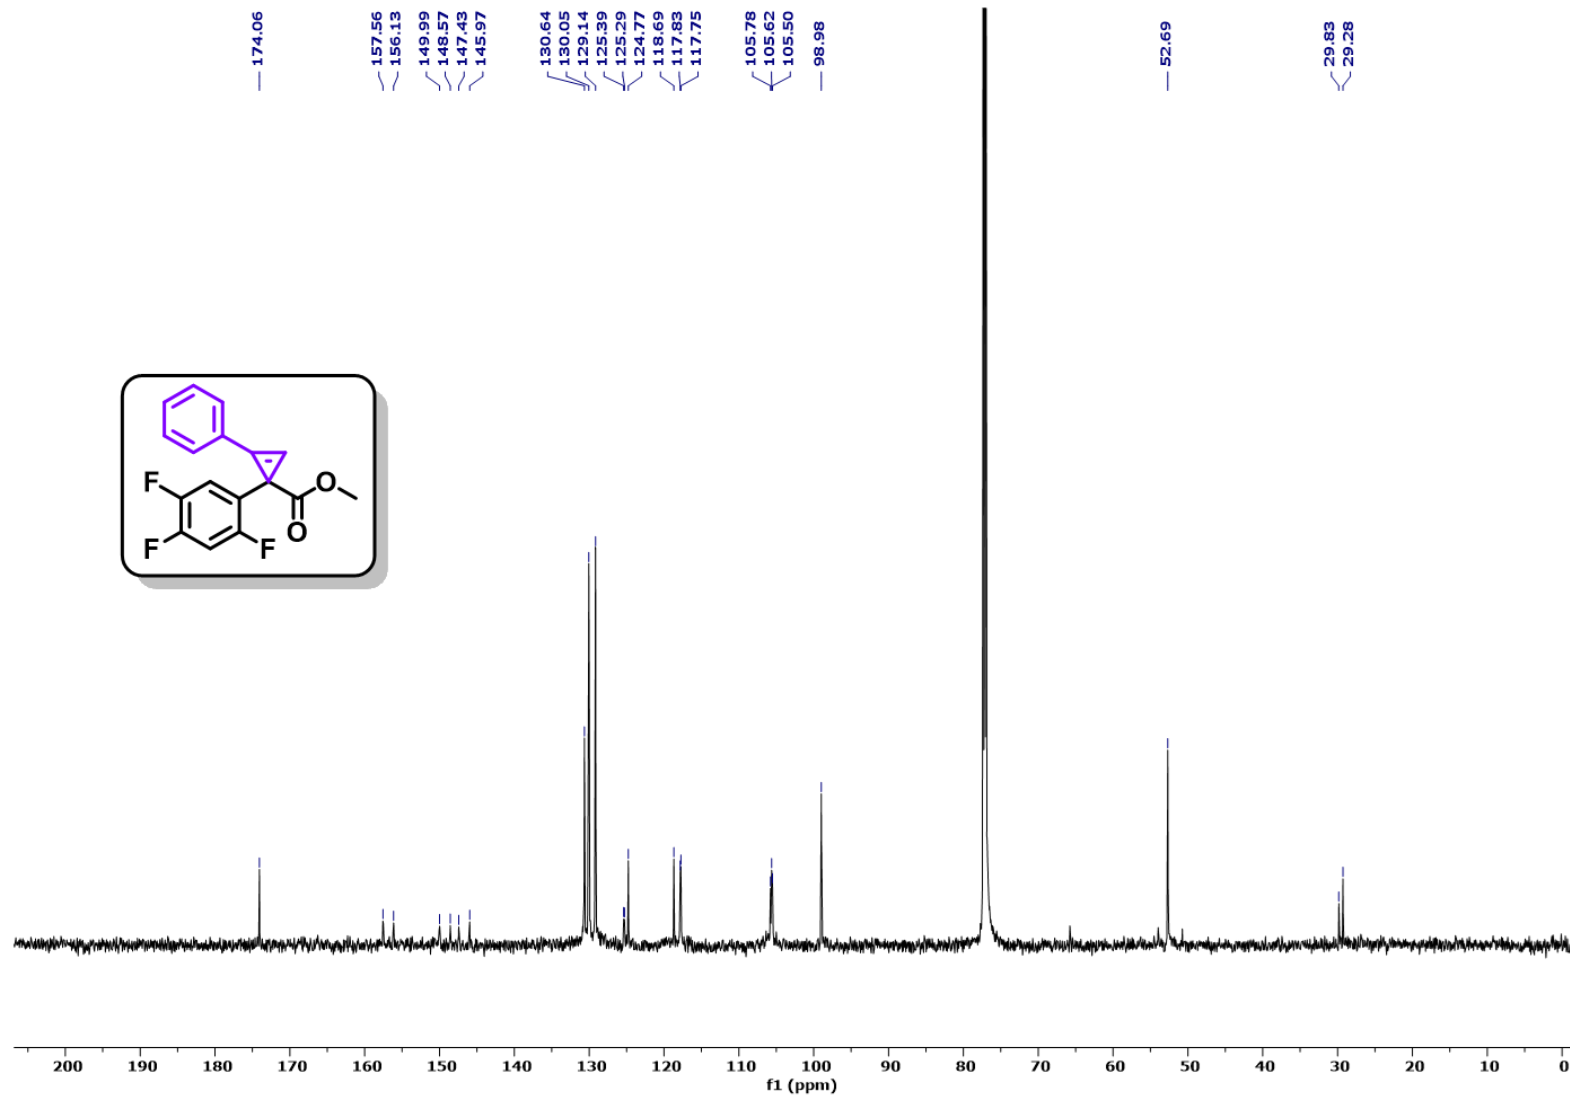

**Fig. S215.**  $^{13}\text{C}$  NMR (176 MHz,  $\text{CDCl}_3$ ) spectra of methyl 2-phenyl-1-(2,4,5-trifluorophenyl)cycloprop-2-ene-1-carboxylate (**12h**).



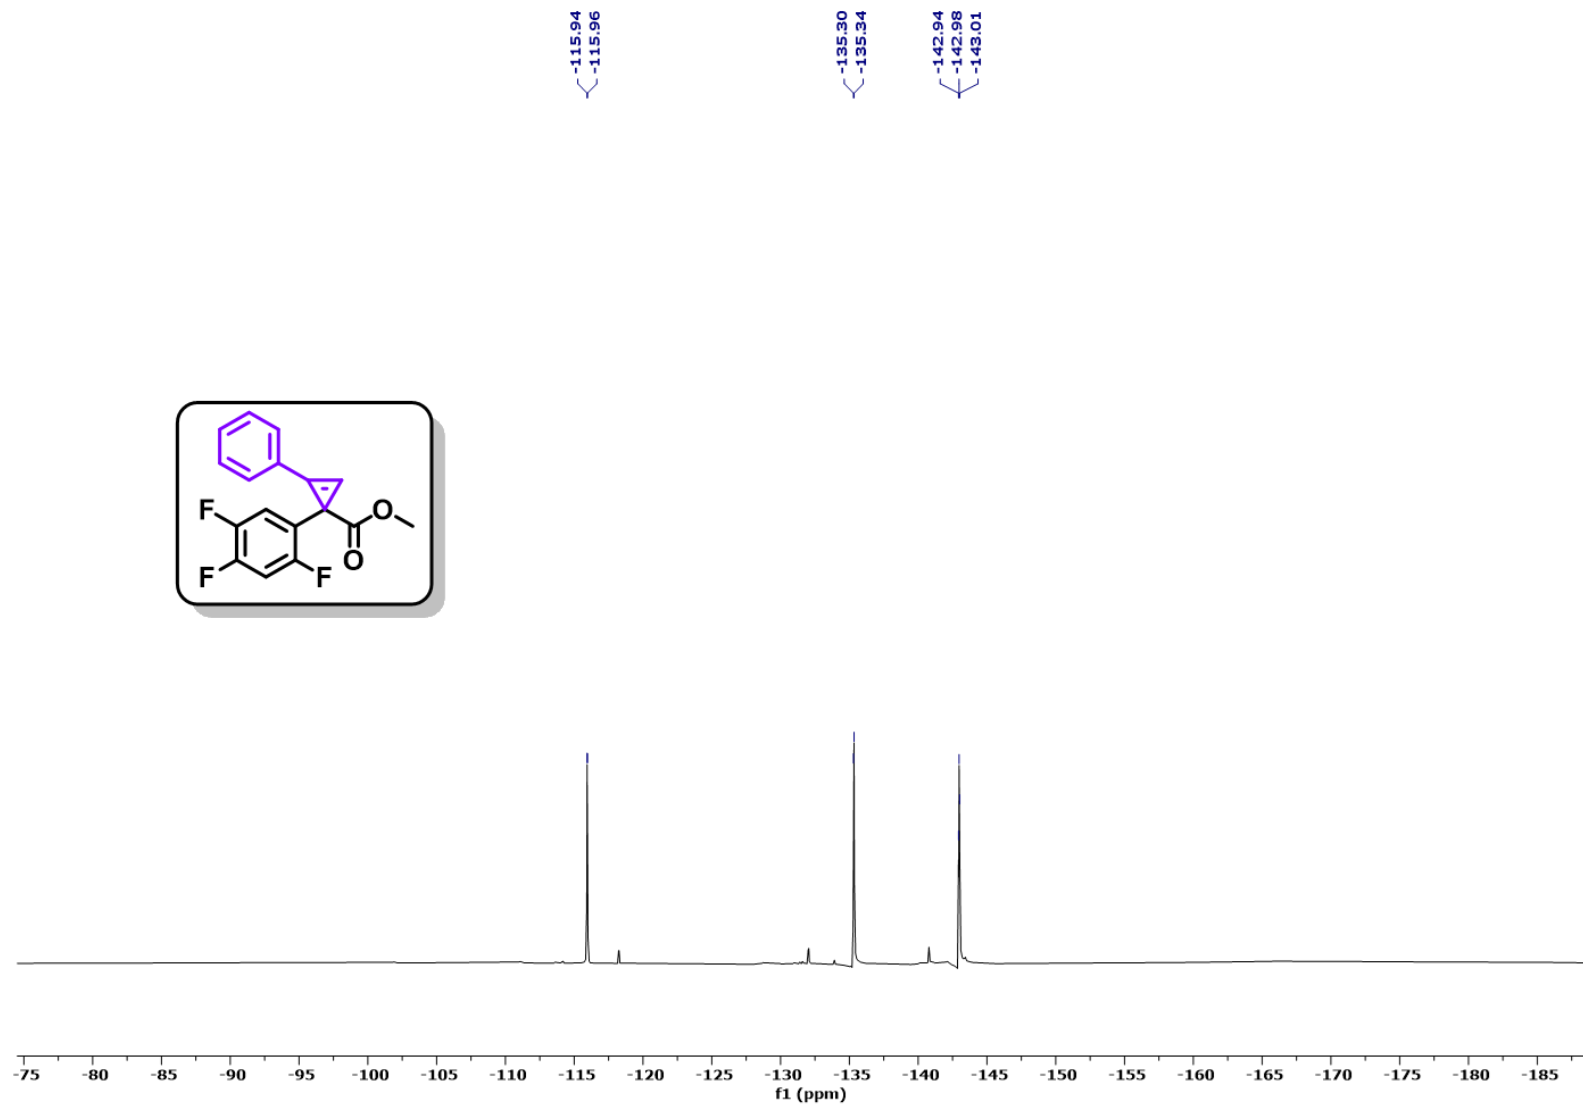

**Fig. S216.**  $^{19}\text{F}$  NMR (471 MHz,  $\text{CDCl}_3$ ) spectra of methyl 2-phenyl-1-(2,4,5-trifluorophenyl)cycloprop-2-ene-1-carboxylate (**12h**).

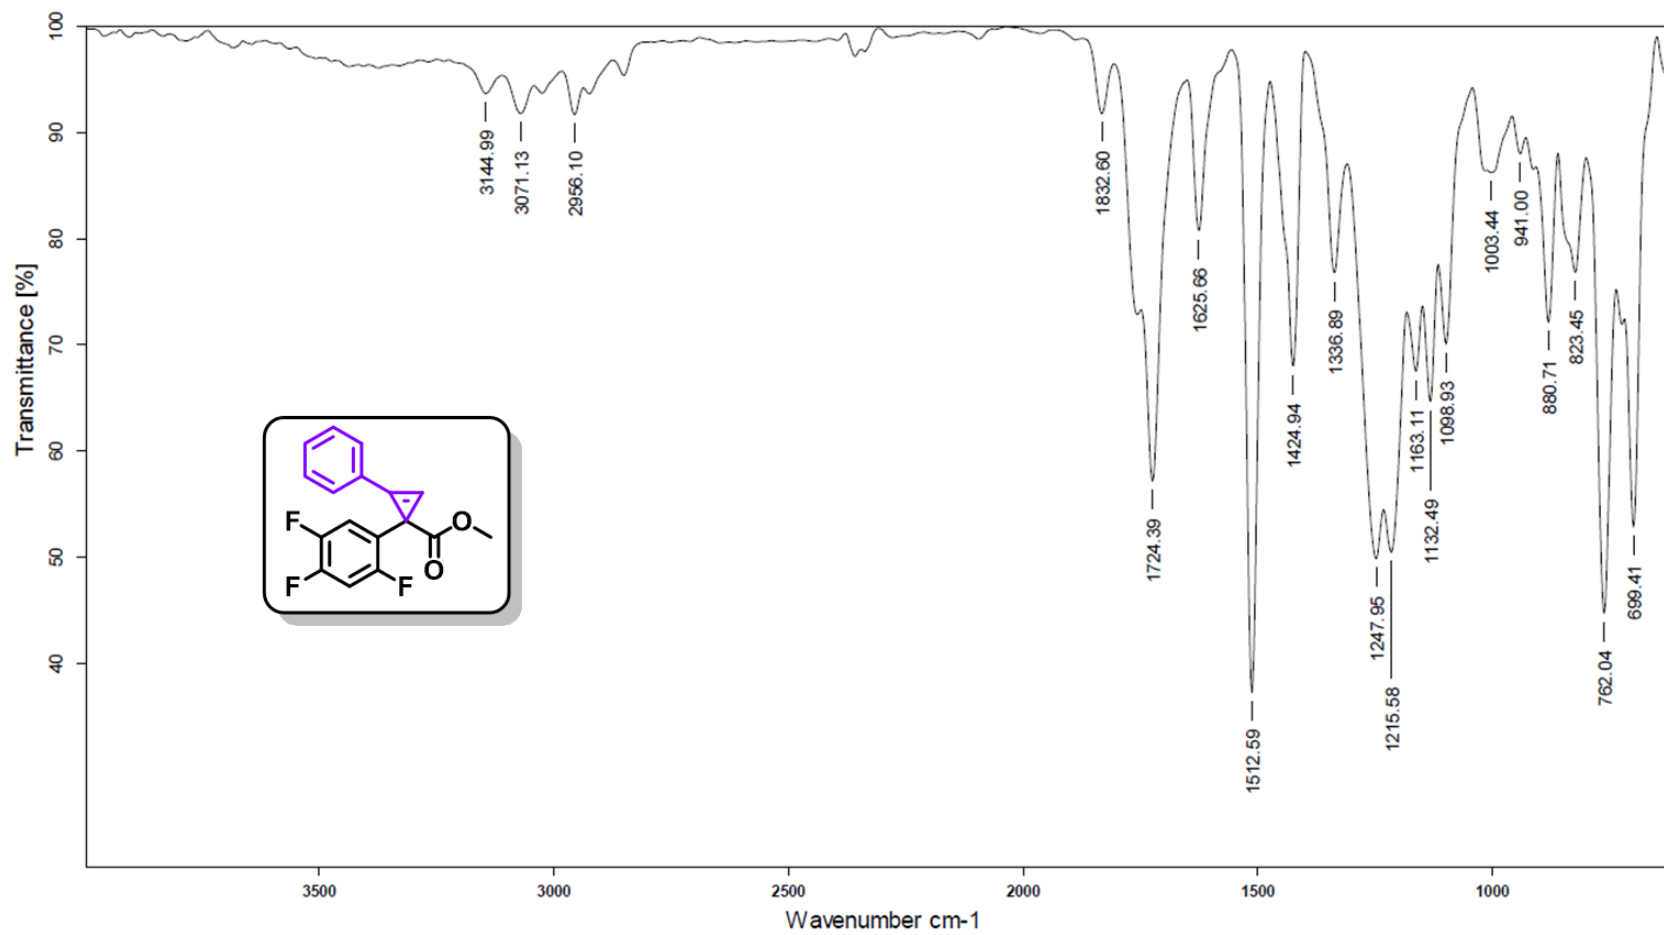

**Fig. S217.** IR spectra of spectra of methyl 2-phenyl-1-(2,4,5-trifluorophenyl)cycloprop-2-ene-1-carboxylate (**3h**).

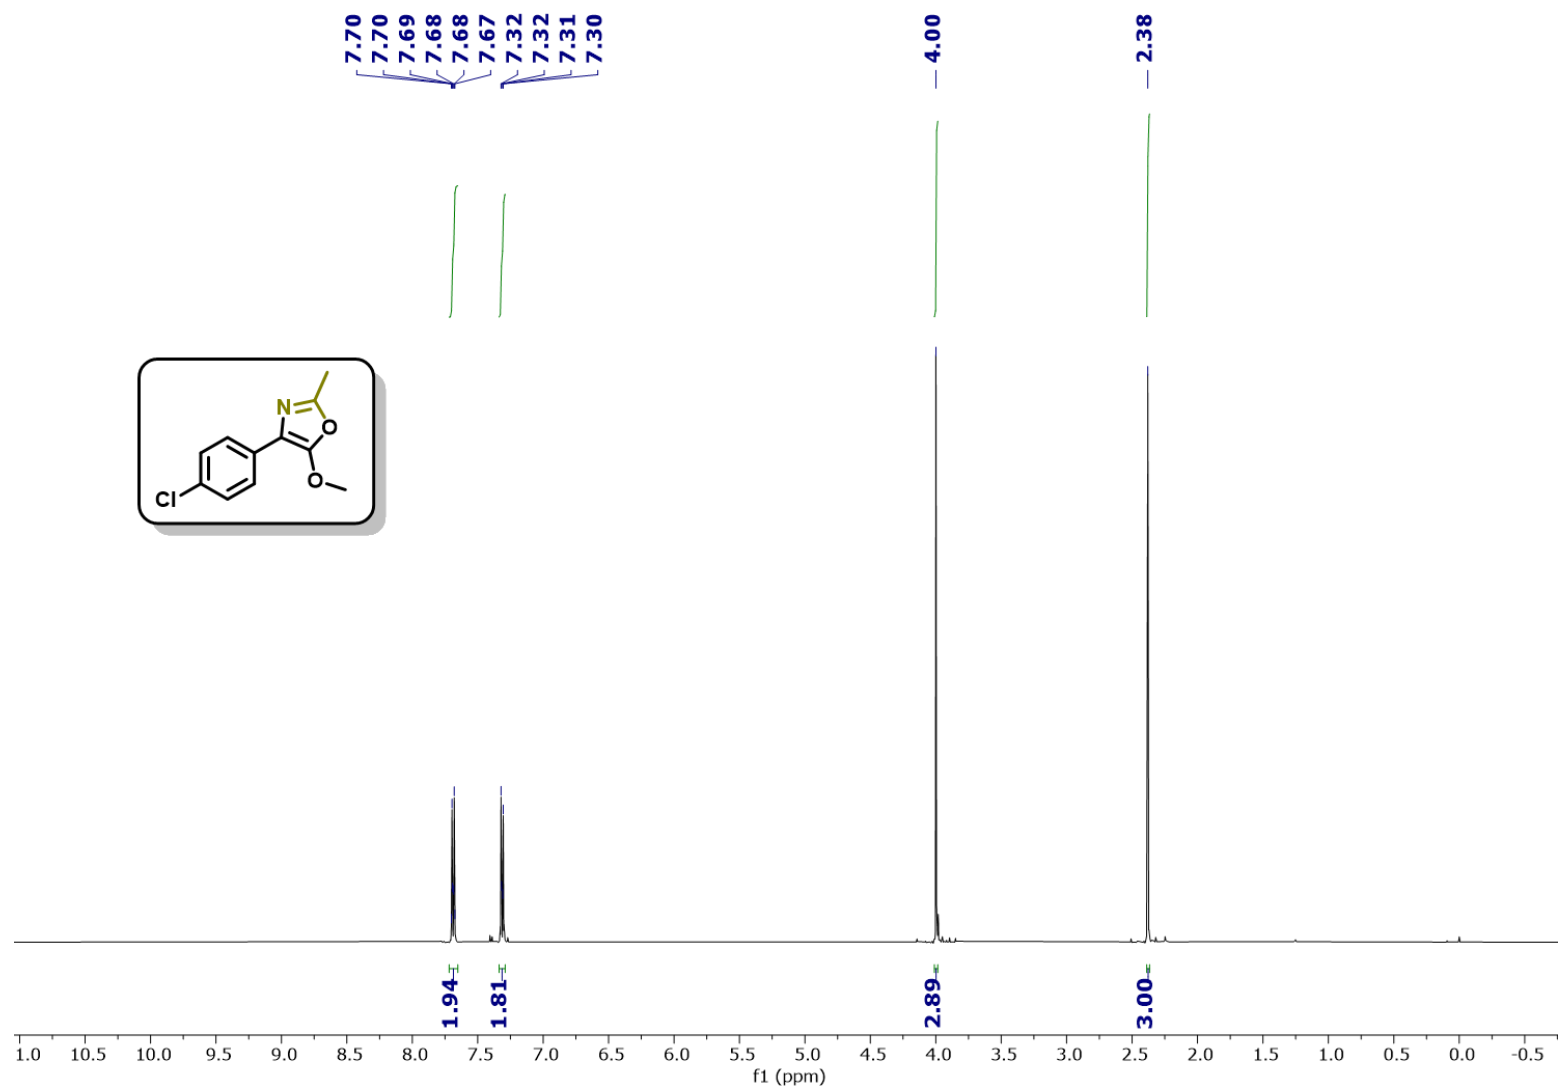

**Fig. S218.** <sup>1</sup>H NMR (500 MHz, CDCl<sub>3</sub>) spectra of 4-(4-chlorophenyl)-5-methoxy-2-methyloxazole (**14a**).

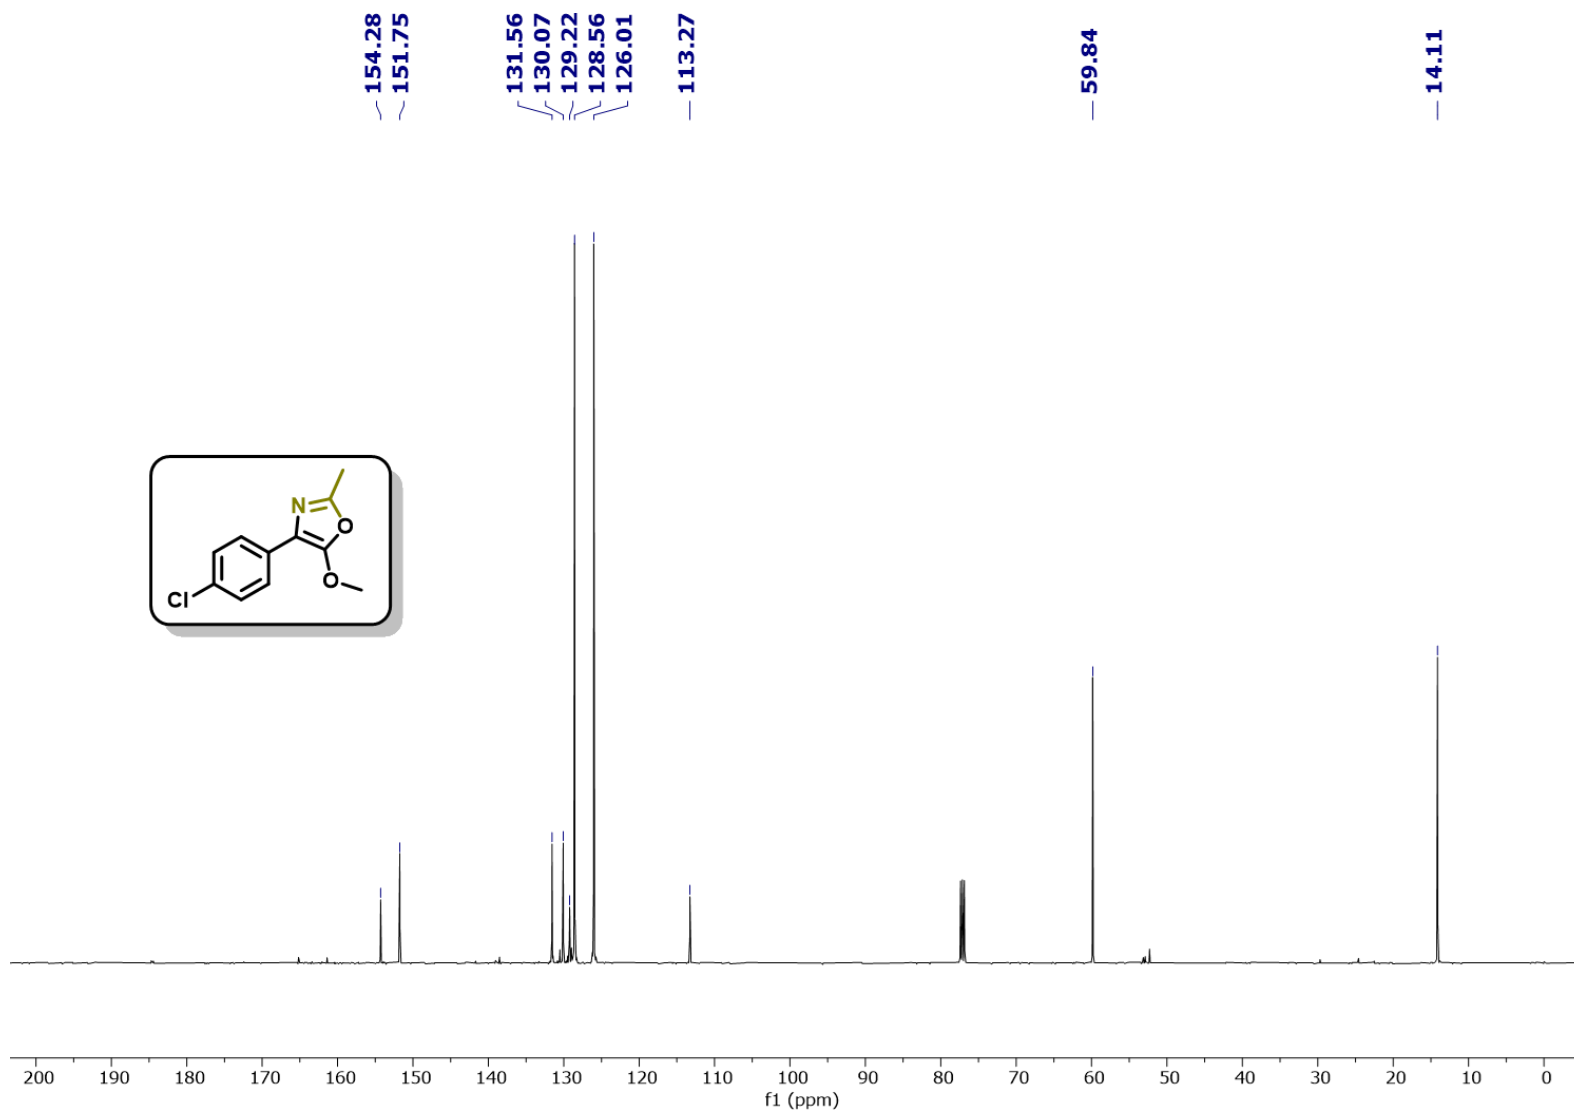

**Fig. S219.** <sup>13</sup>C NMR (101 MHz, CDCl<sub>3</sub>) spectra of 4-(4-chlorophenyl)-5-methoxy-2-methyl-oxazole (**14a**).

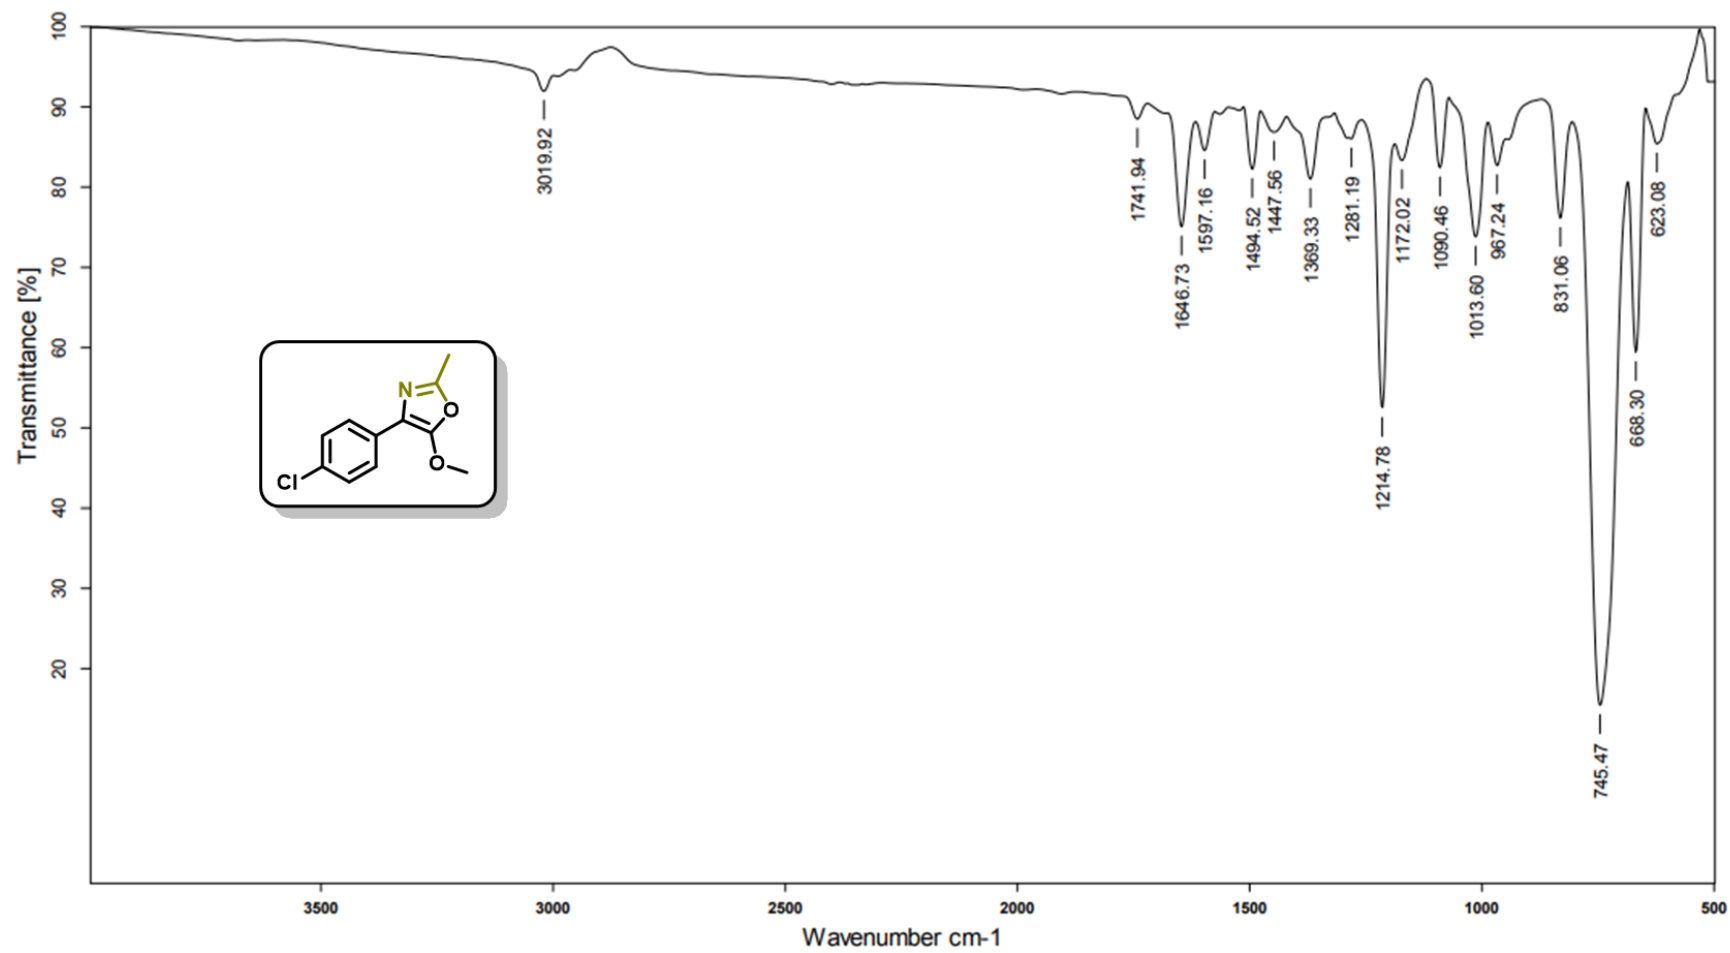

**Fig. S220.** IR spectra of spectra of 4-(4-chlorophenyl)-5-methoxy-2-methyloxazole (**14a**).

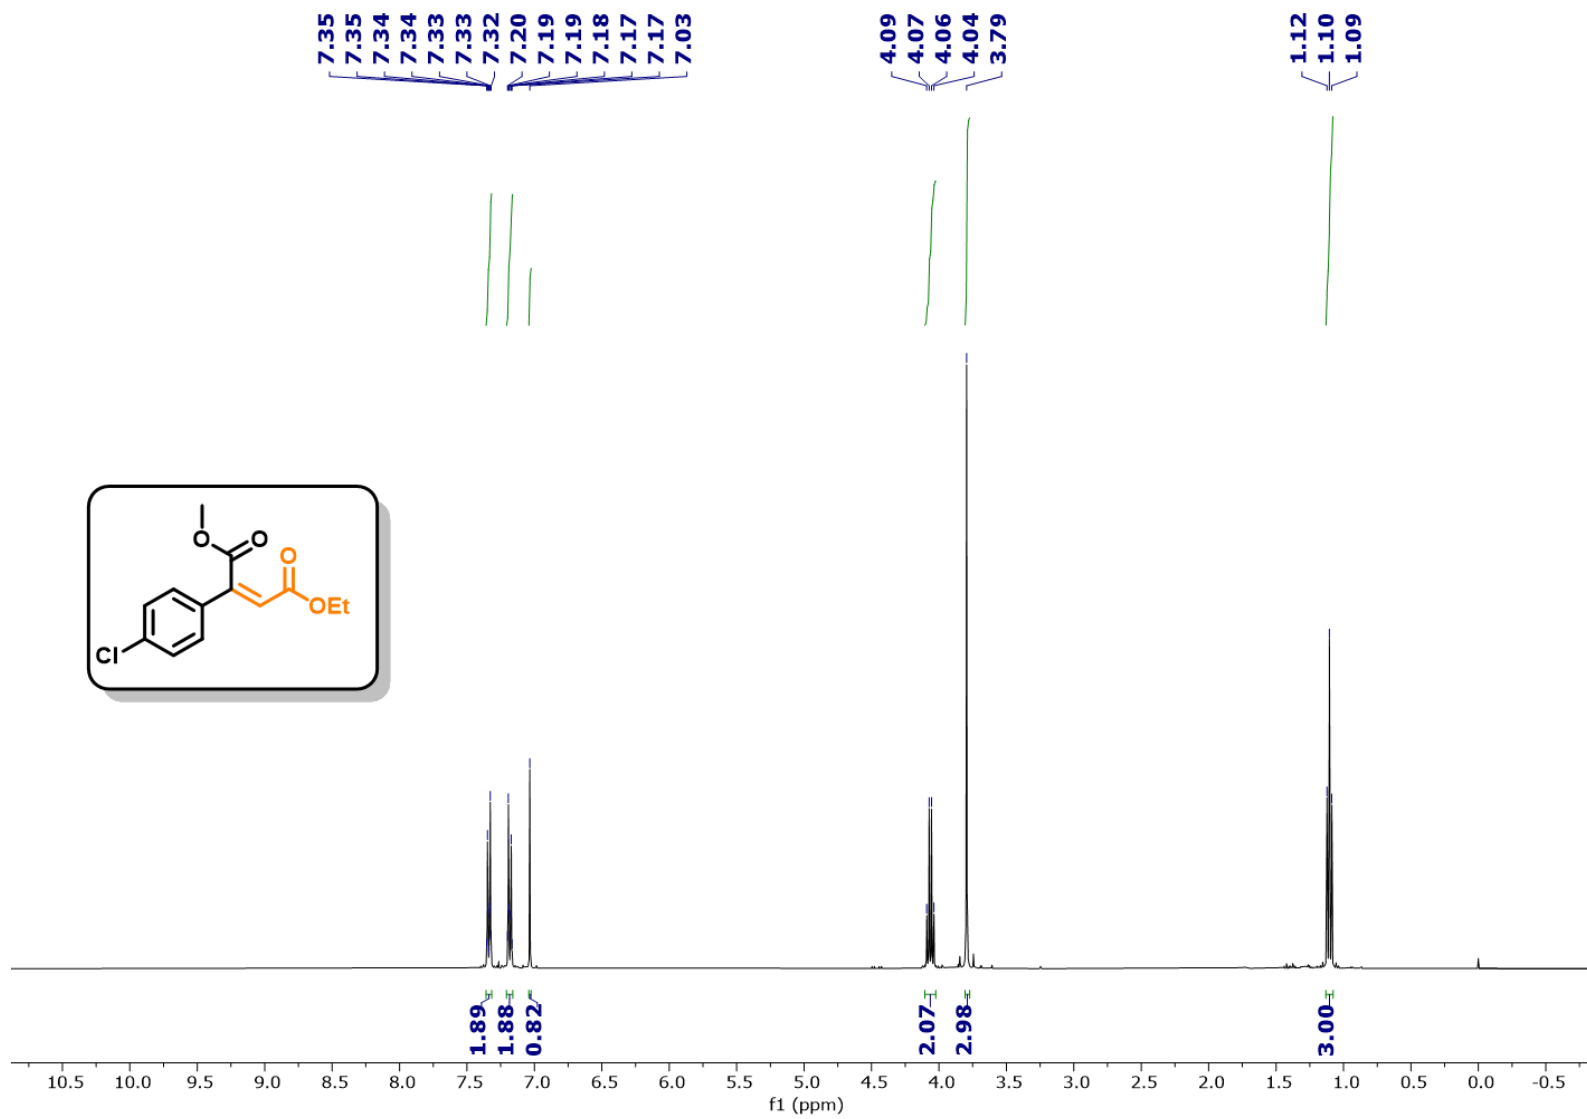

**Fig. S221.** <sup>1</sup>H NMR (400 MHz, CDCl<sub>3</sub>) spectra of 4-ethyl 1-methyl 2-(4-chlorophenyl)maleate (**16a**).

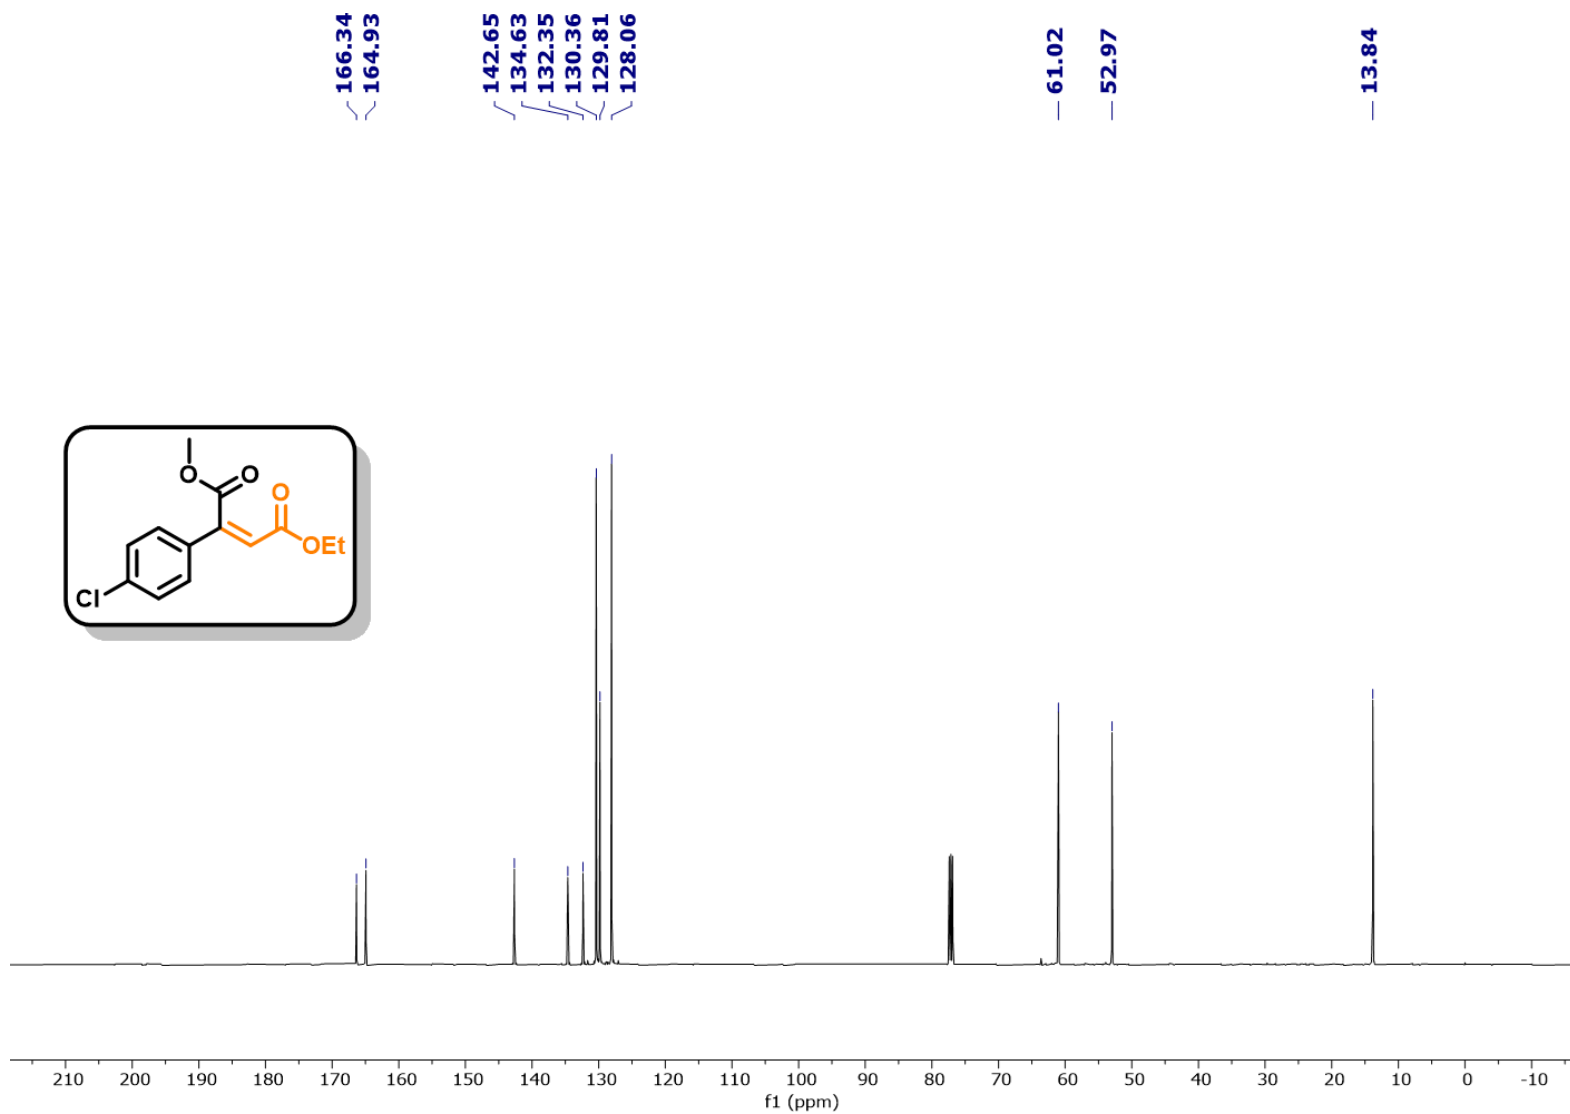

**Fig. S222.**  $^{13}\text{C}$  NMR (126 MHz,  $\text{CDCl}_3$ ) spectra of 4-ethyl 1-methyl 2-(4-chlorophenyl)maleate (**16a**).

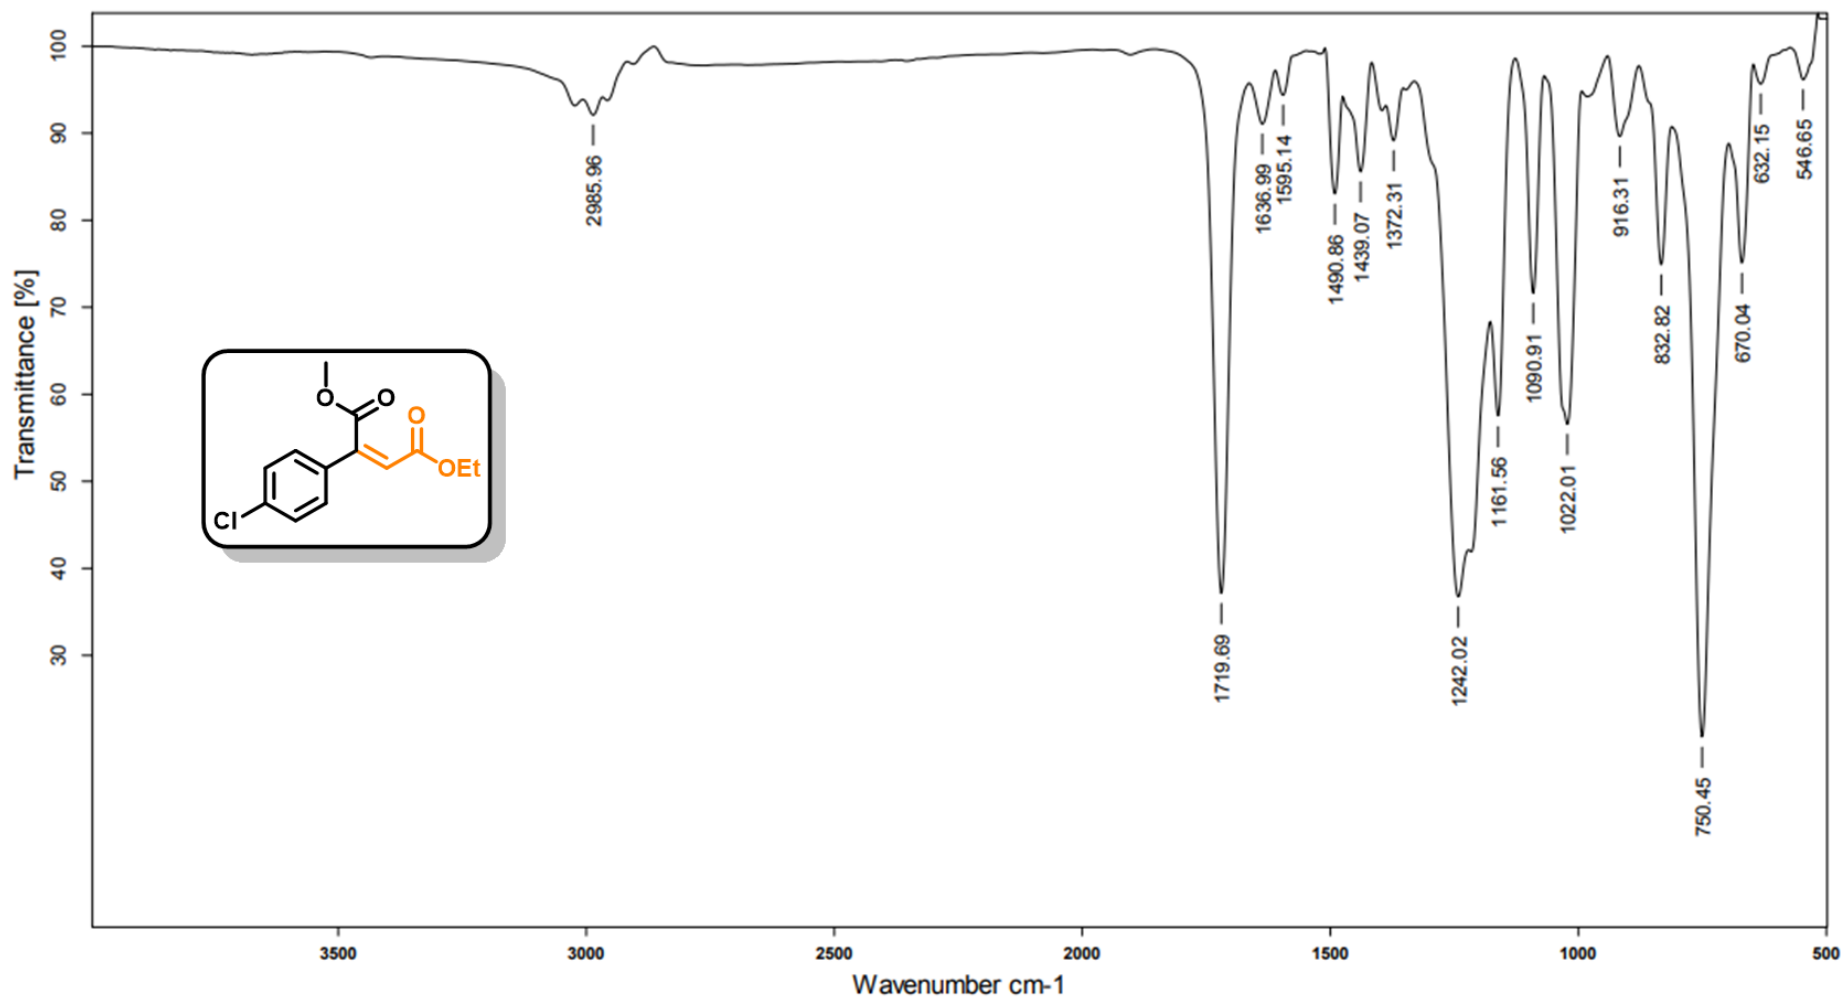

Fig. S223. IR spectra of spectra of 4-ethyl 1-methyl 2-(4-chlorophenyl)maleate (**16a**).
